# Supplementary material for: Comparative Proteomics Combined with Morphophysiological Analysis Revealed Chilling Response Patterns in Two Contrasting Maize Genotypes
Source: Cells. 2022 Apr 13;11(8):1321. doi: 10.3390/cells11081321 (PMC9024610; doi:10.3390/cells11081321)
Supplement: Supplementary file 1 [file cells-11-01321-s001.zip]

Archive with 9 entries (9 files):
- cells-1669641 supplementary conversion.pdf
- Table S1.xlsx
- Table S2.xlsx
- Table S3.xlsx
- Table S4.xlsx
- Table S5.xlsx
- Table S6.xlsx
- Table S7.xlsx
- Table S8.xlsx
