# Supplementary material for: Comparative Proteomics Combined with Morphophysiological Analysis Revealed Chilling Response Patterns in Two Contrasting Maize Genotypes
Source: Cells. 2022 Apr 13;11(8):1321. doi: 10.3390/cells11081321 (PMC9024610; doi:10.3390/cells11081321)
Supplement: Supplementary file 1 [file cells-11-01321-s001.zip › Table S1.xlsx]

## Sheet: Traits
Supplemental Table S1
Physiological responses induced by chilling stress in maize inbred lines KR701 (chilling tolerant) and hei8834 (chilling sensitive) at the first leaf and third leaf stage.
Stage	Treatments	first leaf stage										third leaf stage
Traits		rep1	rep2	rep3	rep4	rep5	rep6	rep7	rep8	rep9	rep10	rep1	rep2	rep3	rep4	rep5	rep6	rep7	rep8	rep9	rep10
Plant height(cm)	KR701(-)	15.8	16.1	16.3	15.7	16.9	16.3	16.9	16.8	16.8	16	26.6	27.4	27.7	27.3	26	26.5	27.3	27.8	27.7	26.5
	KR701(+)	15.6	15.2	15.1	15.2	15.2	15.1	15.3	16	15	15.9	27.4	27.3	26.5	26.1	26.4	26.1	26	26.2	26.1	26
	hei8834(-)	12.2	13.1	12.6	12	12.5	12.2	12.2	12.8	12.1	12	24.8	22.4	22.3	22.9	23.2	24.7	22.5	22.6	22.9	23.1
	hei8834(+)	10.8	10.3	10.4	10.6	10.1	10.3	10.2	10.3	10.5	10.2	23.3	20.8	20.5	20	24.5	20.1	20.1	20.6	20.4	23.2
Root lenth(cm)	KR701(-)	19.5	19.7	18.9	18.9	19.7	18.6	19.5	18.8	19.8	19	25.5	26.2	24.9	25.5	25.1	25.8	25.7	26.2	24.9	25.3
	KR701(+)	19.3	18.4	17.5	18.5	18.4	17.5	17.8	17.7	19.2	19	26.3	25.4	24.5	24.1	25.8	23.9	24	24.7	23.4	24.5
	hei8834(-)	21.3	21.2	21.7	21.5	21.4	21.7	21.8	21.4	21.7	21.6	25.3	25.2	25.7	26.5	25.7	25.8	24.1	25.9	25.7	24.2
	hei8834(+)	12.6	13.2	12.6	12.6	13	12.6	12.8	12.4	12.6	12.5	23.6	25.2	22.6	23.8	22.4	24.6	23.9	22.8	24.6	23.5
Relative leakage(%)	KR701(-)	9.1374	9.2743	9.1743								17.995	20.2578	16.6035
	KR701(+)	21.638	20.371	21.371								33.573	28.6239	30.4209
	hei8834(-)	14.423	14.23	14.33								20.835	19.798	22.438
	hei8834(+)	51.89	46.748	49.748								51.343	50.55	51.497
MDA content(μmol/g)	KR701(-)	1.33585	1.336	1.33933								1.39296	1.35782	1.30754
	KR701(+)	2.01715	2.0235	2.02967								2.58382	2.4576	2.29262
	hei8834(-)	1.56641	1.55906	1.56624								1.46613	1.5648	1.66613
	hei8834(+)	2.7458	2.75203	2.72873								3.42554	3.62554	3.5988
Chl content(mg/g)	KR701(-)	3.26148	3.39196	3.2946								3.29041	3.301	3.4022
	KR701(+)	2.1157	2.0563	2.2748								3.2838	3.1262	3.0703
	hei8834(-)	2.9845	2.8519	2.936								3.4314	3.6642	3.3558
	hei8834(+)	1.4958	1.4645	1.5929								3.1257	2.8967	2.9059
RWC(%)	KR701(-)	73.2751	70.773	72.885								89.5276	90.1064	89.7159
	KR701(+)	28.358	28.535	27.412								84.9934	84.7856	84.7645
	hei8834(-)	68.497	68.549	67.649								89.2114	89.0793	89.3798
	hei8834(+)	22.879	21.499	22.087								80.0387	80.6803	80.7111
SOD activity(U/g)	KR701(-)	215.962	213.208	204.585								238	230	232
	KR701(+)	300.402	305.221	301.811								308	316	328
	hei8834(-)	229.249	211.858	210.553								252	238	230
	hei8834(+)	262.348	265.587	253.968								292	298	316
POD activity(U/g)	KR701(-)	28	28.1	28.5								20.01	20.3	20.2
	KR701(+)	43	42.8	44.5								29	27.2	28.1
	hei8834(-)	20.75	21	20.25								18.56	18.1	23.76
	hei8834(+)	28.75	28.25	28.9								25.9	25.7	26.1
Fv/Fm	KR701(-)	0.718	0.708	0.715								0.732	0.725	0.735
	KR701(+)	0.666	0.65	0.668								0.683	0.687	0.689
	hei8834(-)	0.751	0.7	0.744								0.719	0.728	0.723
	hei8834(+)	0.539	0.535	0.511								0.647	0.652	0.646
(-): uniformly growing seedlings were grown at normal condition for 24 h. (+): uniformly growing seedlings were grown at 4°C for 24 h.

## Sheet: Fold change ratio
The comparative variation indicated in fold change ratio (+chilling/-chilling) induced by chilling stress in maize inbred lines KR701(chilling tolerant) and hei8834 (chilling sensitive) at the first leaf stage and the third leaf stage.
Stage	Fold change ratio	first leaf stage										third leaf stage
Traits		rep1	rep2	rep3	rep4	rep5	rep6	rep7	rep8	rep9	rep10	rep1	rep2	rep3	rep4	rep5	rep6	rep7	rep8	rep9	rep10
Plant height	KR701(+)/(-)	0.953545	0.929095	0.922983	0.929095	0.929095	0.922983	0.935208	0.977995	0.91687	0.971883	0.982275	1.01182	1.0229	1.00812	0.960118	0.978582	1.00812	1.02659	1.0229	0.978582
	hei8834(+)/(-)	0.87308	0.83266	0.840744	0.856912	0.816492	0.83266	0.824576	0.83266	0.848828	0.824576	1.00691	0.898876	0.885912	0.864304	1.05877	0.868626	0.868626	0.890233	0.88159	1.00259
Root lenth	KR701(+)/(-)	1.01351	1.02391	0.982328	0.982328	1.02391	0.966736	1.01351	0.977131	1.02911	0.987526	1.03097	0.995688	0.960408	0.944728	1.01137	0.936887	0.940808	0.968248	0.917287	0.960408
	hei8834(+)/(-)	0.58523	0.613098	0.58523	0.58523	0.603809	0.58523	0.594519	0.575941	0.58523	0.580585	0.928768	0.991736	0.889414	0.936639	0.881543	0.968123	0.940575	0.897285	0.968123	0.924833
Relative leakage	KR701(+)/(-)	2.35319	2.2153	2.3241								1.83609	1.56541	1.66368
	hei8834(+)/(-)	3.62169	3.2628	3.4722								2.44214	2.40444	2.4495
MDA content	KR701(+)/(-)	1.50864	1.51339	1.51801								1.91002	1.81671	1.69476
	hei8834(+)/(-)	1.75574	1.75972	1.74482								2.18788	2.31562	2.29854
Chl content	KR701(+)/(-)	0.638025	0.620126	0.685992								0.985762	0.938452	0.921669
	hei8834(+)/(-)	0.51154	0.500849	0.54475								0.89721	0.831475	0.834111
RWC	KR701(+)/(-)	0.39217	0.394613	0.37909								0.94665	0.944337	0.9441
	hei8834(+)/(-)	0.33531	0.315088	0.323707								0.89706	0.904249	0.90459
SOD activity	KR701(+)/(-)	1.42201	1.44482	1.42868								1.32	1.35429	1.40571
	hei8834(+)/(-)	1.20775	1.22266	1.16917								1.21667	1.24167	1.31667
POD activity	KR701(+)/(-)	1.52482	1.51773	1.57801								1.43778	1.34854	1.39316
	hei8834(+)/(-)	1.39113	1.36694	1.39839								1.286	1.27607	1.29593
Fv/Fm	KR701(+)/(-)	0.933209	0.91079	0.93601								0.934763	0.94024	0.94297
	hei8834(+)/(-)	0.736674	0.73121	0.69841								0.89447	0.90138	0.89309
(+)/(-): +chilling/-chillling
