# Supplementary material for: Comparative Proteomics Combined with Morphophysiological Analysis Revealed Chilling Response Patterns in Two Contrasting Maize Genotypes
Source: Cells. 2022 Apr 13;11(8):1321. doi: 10.3390/cells11081321 (PMC9024610; doi:10.3390/cells11081321)
Supplement: Supplementary file 1 [file cells-11-01321-s001.zip › Table S2.xlsx]

## Sheet: Proteins
Supplemental Table S2
Basic profiles of proteomics data.
Checked	Master	Accession	Description	Coverage	# Peptides	# PSMs	# Unique Peptides	# Protein Groups	# AAs	MW [kDa]	calc. pI	emPAI	Protein FDR Confidence Sequest HT	Exp. q-value Sequest HT	Score Sequest HT	# Peptides Sequest HT	# Razor Peptides
FALSE	Master Protein	GRMZM2G083841_P01	pep:known chromosome:AGPv3:9:62306266:62311673:1 gene:GRMZM2G083841 transcript:GRMZM2G083841_T01 description:"est|mrna"	74	80	1471	70	1	970	109.3	6.04	600.744	High	0	6533.54	80	12
FALSE	Master Protein	GRMZM2G448344_P01 pep:known chromosome:AGPv3:1:203965684:203971162:-1 gene:GRMZM2G448344 transcript:GRMZM2G448344_T01 description:"cdna	est omrna|protein"	61	35	1056	30	1	483	53.4	6.79	3980.07	High	0	4715.21	35	5
FALSE	Master Protein	GRMZM2G306345_P05	pep:novel chromosome:AGPv3:6:146179404:146189965:-1 gene:GRMZM2G306345 transcript:GRMZM2G306345_T05 description:"est|protein"	75	52	885	33	1	708	76.6	6.93	642.444	High	0	4037.41	52	25
FALSE	Master Protein	GRMZM5G808402_P01	pep:known chromosome:AGPv3:Pt:54176:56114:-1 gene:GRMZM5G808402 transcript:GRMZM5G808402_T01 description:"mrna|protein"	93	37	880	8	1	498	54	5.43	3855.62	High	0	3838.22	37	40
FALSE	Master Protein	GRMZM2G448142_P02 pep:known chromosome:AGPv3:1:203943761:203950567:-1 gene:GRMZM2G448142 transcript:GRMZM2G448142_T02 description:"cdna	est protein"	73	27	739	1	1	448	48.4	4.89	2153.43	High	0	3259.85	27	0
FALSE	Master Protein	GRMZM2G089136_P01	pep:known chromosome:AGPv3:6:156450601:156453368:-1 gene:GRMZM2G089136 transcript:GRMZM2G089136_T01 description:"mrna|protein"	82	34	492	18	1	480	49.8	6.73	283.804	High	0	2185	34	18
FALSE	Master Protein	GRMZM2G097457_P01	pep:known chromosome:AGPv3:8:106530187:106541052:1 gene:GRMZM2G097457 transcript:GRMZM2G097457_T01 description:"omrna"	67	51	516	27	1	952	103	6.43	49.481	High	0	2157.44	51	5
FALSE	Master Protein	GRMZM5G808939_P01	pep:known chromosome:AGPv3:Pt:70706:72490:1 gene:GRMZM5G808939 transcript:GRMZM5G808939_T01 description:"mrna|protein"	38	16	435	16	1	508	56.1	6.54	222.872	High	0	2114.49	16	0
FALSE	Master Protein	GRMZM5G845611_P01	pep:known chromosome:AGPv3:1:6404117:6406779:1 gene:GRMZM5G845611 transcript:GRMZM5G845611_T01 description:"cdna"	71	29	499	23	1	449	47.2	6.39	183.785	High	0	2112.65	29	7
FALSE	Master Protein	GRMZM2G337113_P02	pep:known chromosome:AGPv3:2:42886006:42888042:-1 gene:GRMZM2G337113 transcript:GRMZM2G337113_T02 description:"est"	71	22	438	16	1	403	42.8	7.4	176.828	High	0	1833.3	22	0
FALSE	Master Protein	GRMZM2G085019_P01 pep:known chromosome:AGPv3:3:7276387:7281737:1 gene:GRMZM2G085019 transcript:GRMZM2G085019_T01 description:"cdna	est omrna|protein"	62	33	439	28	1	636	69.8	6.62	118.378	High	0	1730.03	33	6
FALSE	Master Protein	GRMZM2G121878_P01 pep:known chromosome:AGPv3:3:215547876:215555228:-1 gene:GRMZM2G121878 transcript:GRMZM2G121878_T01 description:"est	omrna protein"	76	28	388	2	1	452	49.3	8.46	86.992	High	0	1636.78	28	29
FALSE	Master Protein	GRMZM2G015419_P02 pep:known chromosome:AGPv3:4:234164922:234168659:1 gene:GRMZM2G015419 transcript:GRMZM2G015419_T02 description:"cdna	est omrna|protein"	58	48	364	30	1	905	102	6.57	66.688	High	0	1611.54	48	18
FALSE	Master Protein	GRMZM2G121878_P03 pep:known chromosome:AGPv3:3:215547876:215555228:-1 gene:GRMZM2G121878 transcript:GRMZM2G121878_T03 description:"cdna	est omrna"	72	27	377	1	1	456	49.5	8.56	76.426	High	0	1569.2	27	0
FALSE	Master Protein	GRMZM2G083016_P01 pep:known chromosome:AGPv3:8:120300948:120305946:-1 gene:GRMZM2G083016 transcript:GRMZM2G083016_T01 description:"cdna	est omrna|protein"	63	27	341	10	1	477	49.6	7.47	124.893	High	0	1568.92	27	0
FALSE	Master Protein	GRMZM2G175562_P02 pep:known chromosome:AGPv3:6:88908079:88909775:1 gene:GRMZM2G175562 transcript:GRMZM2G175562_T02 description:"cdna	est omrna|protein"	70	24	332	6	1	329	34.5	5.64	283.804	High	0	1503.21	24	0
FALSE	Master Protein	GRMZM2G033208_P01 pep:known chromosome:AGPv3:9:22790749:22795294:1 gene:GRMZM2G033208 transcript:GRMZM2G033208_T01 description:"cdna	est omrna|protein"	59	30	332	30	1	633	68.7	5.72	99	High	0	1409.68	30	0
FALSE	Master Protein	GRMZM2G083716_P01 pep:known chromosome:AGPv3:9:25935741:25940848:1 gene:GRMZM2G083716 transcript:GRMZM2G083716_T01 description:"cdna	est protein"	69	42	299	14	1	600	64	5.57	237.989	High	0	1354.58	42	29
FALSE	Master Protein	GRMZM2G001696_P01 pep:known chromosome:AGPv3:1:35744406:35748813:-1 gene:GRMZM2G001696 transcript:GRMZM2G001696_T01 description:"cdna	est protein"	73	44	302	26	1	667	73.4	6.93	275.605	High	0	1349.82	44	22
FALSE	Master Protein	GRMZM2G113349_P01 pep:known chromosome:AGPv3:5:51897880:51899471:1 gene:GRMZM2G113349 transcript:GRMZM2G113349_T01 description:"cdna	est omrna|protein"	63	24	296	6	1	373	39.1	7.74	120.153	High	0	1345.3	24	18
FALSE	Master Protein	GRMZM2G382914_P04	pep:known chromosome:AGPv3:5:84858054:84861666:1 gene:GRMZM2G382914 transcript:GRMZM2G382914_T04 description:"est|protein"	55	30	287	26	1	572	60.8	9.38	42.067	High	0	1320.19	30	1
FALSE	Master Protein	GRMZM2G059083_P01 pep:known chromosome:AGPv3:3:147329219:147331452:-1 gene:GRMZM2G059083 transcript:GRMZM2G059083_T01 description:"cdna	est omrna|protein"	64	27	275	15	1	368	40.8	7.68	233.623	High	0	1244.49	27	16
FALSE	Master Protein	GRMZM2G013342_P01 pep:known chromosome:AGPv3:1:290521010:290522107:1 gene:GRMZM2G013342 transcript:GRMZM2G013342_T01 description:"cdna	est omrna|protein"	66	14	291	3	1	199	21.6	9.76	99	High	0	1228.46	14	0
FALSE	Master Protein	GRMZM2G123922_P01 pep:known chromosome:AGPv3:10:111258316:111265830:-1 gene:GRMZM2G123922 transcript:GRMZM2G123922_T01 description:"cdna	est omrna|protein"	64	64	271	5	1	921	102	6.61	71.79	High	0	1196.37	64	66
FALSE	Master Protein	GRMZM2G106061_P01 pep:known chromosome:AGPv3:5:180683064:180685070:1 gene:GRMZM2G106061 transcript:GRMZM2G106061_T01 description:"cdna	est omrna|protein"	77	29	279	7	1	465	50.5	6.48	500.187	High	0	1194.61	29	28
FALSE	Master Protein	GRMZM2G046284_P01 pep:known chromosome:AGPv3:10:10198909:10200857:-1 gene:GRMZM2G046284 transcript:GRMZM2G046284_T01 description:"cdna	est omrna|protein"	54	22	284	12	1	388	41.7	7.83	90.201	High	0	1192.77	22	11
FALSE	Master Protein	GRMZM5G858094_P02	pep:known chromosome:AGPv3:2:83024018:83036516:1 gene:GRMZM5G858094 transcript:GRMZM5G858094_T02 description:"cdna"	53	103	281	42	1	2325	257.1	6.3	15.888	High	0	1180.31	103	68
FALSE	Master Protein	GRMZM2G079668_P02 pep:known chromosome:AGPv3:1:263209037:263214887:1 gene:GRMZM2G079668 transcript:GRMZM2G079668_T02 description:"cdna	est omrna|protein"	55	41	259	4	1	683	73	5.29	174.083	High	0	1162.28	41	40
FALSE	Master Protein	GRMZM2G009443_P01 pep:known chromosome:AGPv3:10:35591531:35598325:1 gene:GRMZM2G009443 transcript:GRMZM2G009443_T01 description:"cdna	est omrna|protein"	60	61	260	21	1	921	102	6.64	57.434	High	0	1155.79	61	2
FALSE	Master Protein	GRMZM2G162200_P01 pep:known chromosome:AGPv3:4:693736:696087:1 gene:GRMZM2G162200 transcript:GRMZM2G162200_T01 description:"cdna	est omrna|protein"	76	30	268	22	1	433	47.9	6.73	1184.97	High	0	1155.12	30	10
FALSE	Master Protein	GRMZM2G340251_P03 pep:known chromosome:AGPv3:3:126480083:126484332:-1 gene:GRMZM2G340251 transcript:GRMZM2G340251_T03 description:"abinitio	cdna est|omrna"	65	46	274	4	1	649	71.1	5.22	444.296	High	0	1152.78	46	1
FALSE	Master Protein	GRMZM2G098520_P01 pep:known chromosome:AGPv3:4:190228051:190230492:-1 gene:GRMZM2G098520 transcript:GRMZM2G098520_T01 description:"cdna	est protein"	75	14	282	8	1	170	19.1	8.91	157.489	High	0	1146.84	14	6
FALSE	Master Protein	GRMZM2G180625_P03	pep:known chromosome:AGPv3:6:6901483:6905941:-1 gene:GRMZM2G180625 transcript:GRMZM2G180625_T03 description:"omrna|protein"	85	26	265	7	1	342	37.2	7.18	331.46	High	0	1140.91	26	21
FALSE	Master Protein	GRMZM2G001327_P03	pep:known chromosome:AGPv3:6:136879633:136882882:-1 gene:GRMZM2G001327 transcript:GRMZM2G001327_T03 description:"est|protein"	72	27	243	6	1	447	49.2	9.13	71.79	High	0	1128.28	27	25
FALSE	Master Protein	GRMZM2G111475_P01 pep:novel chromosome:AGPv3:5:12591527:12597175:-1 gene:GRMZM2G111475 transcript:GRMZM2G111475_T01 description:"cdna	est omrna|protein"	52	39	248	2	1	683	73.2	5.26	136.686	High	0	1122.34	39	0
FALSE	Master Protein	GRMZM2G149751_P03 pep:known chromosome:AGPv3:1:176865369:176871676:1 gene:GRMZM2G149751 transcript:GRMZM2G149751_T03 description:"abinitio	cdna omrna"	63	46	241	28	1	766	84.4	5.77	81.54	High	0	1113.31	46	25
FALSE	Master Protein	AC233866.1_FGP006	pep:known chromosome:AGPv3:6:137601820:137603647:-1 gene:AC233866.1_FG006 transcript:AC233866.1_FGT006 description:"abinitio"	72	26	237	1	1	447	49.3	9.11	66.234	High	0	1110.14	26	4
FALSE	Master Protein	GRMZM2G113033_P02 pep:known chromosome:AGPv3:2:143429392:143430540:1 gene:GRMZM2G113033 transcript:GRMZM2G113033_T02 description:"cdna	est omrna"	76	11	253	5	1	153	17.8	7.99	162.789	High	0	1096.48	11	0
FALSE	Master Protein	GRMZM2G001500_P02	pep:known chromosome:AGPv3:10:21730900:21736012:1 gene:GRMZM2G001500 transcript:GRMZM2G001500_T02 description:"mrna"	56	41	237	20	1	703	74.6	5.21	93.406	High	0	1081.96	41	0
FALSE	Master Protein	GRMZM2G046804_P04	pep:known chromosome:AGPv3:4:36913992:36917377:-1 gene:GRMZM2G046804 transcript:GRMZM2G046804_T04 description:"est"	69	25	253	8	1	391	42.2	6.86	108.26	High	0	1074.64	25	0
FALSE	Master Protein	GRMZM2G126361_P02 pep:known chromosome:AGPv3:6:83126966:83130839:1 gene:GRMZM2G126361 transcript:GRMZM2G126361_T02 description:"est	omrna protein"	51	35	243	35	1	688	72.7	5.82	540.17	High	0	1072.56	35	0
FALSE	Master Protein	GRMZM2G056039_P01 pep:known chromosome:AGPv3:1:154092556:154096679:1 gene:GRMZM2G056039 transcript:GRMZM2G056039_T01 description:"cdna	est omrna|protein"	65	46	240	4	1	649	71	5.25	325.222	High	0	1042.45	46	46
FALSE	Master Protein	GRMZM2G153541_P06	pep:known chromosome:AGPv3:9:88068734:88070843:1 gene:GRMZM2G153541 transcript:GRMZM2G153541_T06 description:"protein"	62	23	216	2	1	447	49.3	9.11	47.939	High	0	1007.86	23	0
FALSE	Master Protein	GRMZM2G036609_P01 pep:known chromosome:AGPv3:7:171002271:171021085:-1 gene:GRMZM2G036609 transcript:GRMZM2G036609_T01 description:"cdna	est protein"	53	65	226	65	1	1616	175	6.64	24.366	High	0	989.17	65	0
FALSE	Master Protein	GRMZM2G407996_P01 pep:known chromosome:AGPv3:4:131204515:131207279:1 gene:GRMZM2G407996 transcript:GRMZM2G407996_T01 description:"abinitio	cdna protein"	74	27	224	5	1	466	50.7	6.64	355.225	High	0	953.71	27	0
FALSE	Master Protein	GRMZM2G094165_P01	pep:known chromosome:AGPv3:8:146085244:146092183:1 gene:GRMZM2G094165 transcript:GRMZM2G094165_T01 description:"est|omrna"	54	14	208	1	1	245	26.5	8.41	170.907	High	0	910.57	14	0
FALSE	Master Protein	GRMZM2G001084_P01	pep:known chromosome:AGPv3:2:64406192:64419933:1 gene:GRMZM2G001084 transcript:GRMZM2G001084_T01 description:"est|mrna"	54	50	209	1	1	896	100.2	6.58	43.478	High	0	907.16	50	0
FALSE	Master Protein	GRMZM2G114945_P01 pep:known chromosome:AGPv3:2:103028617:103030359:-1 gene:GRMZM2G114945 transcript:GRMZM2G114945_T01 description:"cdna	est omrna|protein"	63	28	210	25	1	374	42	7.01	236.137	High	0	899.95	28	3
FALSE	Master Protein	GRMZM2G112165_P01 pep:known chromosome:AGPv3:2:190093038:190097209:1 gene:GRMZM2G112165 transcript:GRMZM2G112165_T01 description:"cdna	est omrna|protein"	61	51	214	8	1	698	80.1	5.1	76.426	High	0	893	51	46
FALSE	Master Protein	GRMZM2G095851_P01 pep:known chromosome:AGPv3:1:296424348:296428658:1 gene:GRMZM2G095851 transcript:GRMZM2G095851_T01 description:"cdna	est omrna|protein"	63	51	207	3	1	843	93.9	6.35	82.768	High	0	860.6	51	0
FALSE	Master Protein	AC203173.3_FGP004	pep:known chromosome:AGPv3:8:174769780:174773141:-1 gene:AC203173.3_FG004 transcript:AC203173.3_FGT004 description:"abinitio"	63	51	204	3	1	843	93.8	6.35	79.139	High	0	850.62	51	59
FALSE	Master Protein	GRMZM2G069651_P01 pep:known chromosome:AGPv3:7:131816486:131820321:1 gene:GRMZM2G069651 transcript:GRMZM2G069651_T01 description:"cdna	est omrna|protein"	54	47	200	2	1	699	80.2	5.11	43.893	High	0	824.77	47	0
FALSE	Master Protein	GRMZM2G047954_P01 pep:known chromosome:AGPv3:7:4799319:4801203:-1 gene:GRMZM2G047954 transcript:GRMZM2G047954_T01 description:"cdna	est omrna|protein"	51	14	182	8	1	303	31.8	9.45	12.503	High	0	818.23	14	0
FALSE	Master Protein	GRMZM2G121878_P04	pep:known chromosome:AGPv3:3:215547876:215550056:-1 gene:GRMZM2G121878 transcript:GRMZM2G121878_T04 description:"est|omrna"	79	10	179	1	1	164	17.8	6.89	145.78	High	0	816.91	10	0
FALSE	Master Protein	GRMZM2G343543_P05	pep:known chromosome:AGPv3:6:102923481:102926877:-1 gene:GRMZM2G343543 transcript:GRMZM2G343543_T05 description:"est|mrna"	62	23	179	2	1	447	49.3	9.06	40.753	High	0	815.06	23	0
FALSE	Master Protein	GRMZM2G155253_P02	pep:known chromosome:AGPv3:4:204774264:204776415:-1 gene:GRMZM2G155253 transcript:GRMZM2G155253_T02 description:"cdna|est"	54	21	194	11	1	394	42.4	6.58	74.858	High	0	813.17	21	0
FALSE	Master Protein	GRMZM2G016677_P01 pep:known chromosome:AGPv3:2:237620514:237622123:-1 gene:GRMZM2G016677 transcript:GRMZM2G016677_T01 description:"cdna	est omrna|protein"	60	15	169	9	1	258	27.2	8.87	32.598	High	0	804.64	15	6
FALSE	Master Protein	GRMZM2G095252_P02 pep:novel chromosome:AGPv3:6:58716320:58718708:-1 gene:GRMZM2G095252 transcript:GRMZM2G095252_T02 description:"cdna	est omrna|protein"	73	25	178	4	1	332	35.6	5.17	298.358	High	0	802.27	25	0
FALSE	Master Protein	GRMZM2G015295_P01 pep:known chromosome:AGPv3:4:21158461:21161610:1 gene:GRMZM2G015295 transcript:GRMZM2G015295_T01 description:"cdna	est omrna|protein"	68	29	179	29	1	485	53.2	5.9	116.877	High	0	776.78	29	0
FALSE	Master Protein	AC215201.3_FGP005	pep:novel chromosome:AGPv3:6:142273603:142277674:1 gene:AC215201.3_FG005 transcript:AC215201.3_FGT005 description:"abinitio"	58	33	173	27	1	593	63.1	5.12	70.969	High	0	769.2	33	7
FALSE	Master Protein	GRMZM5G810061_P01	pep:known chromosome:AGPv3:2:23124080:23127981:1 gene:GRMZM5G810061 transcript:GRMZM5G810061_T01 description:"est|mrna"	67	41	180	10	1	769	84.5	5.73	49.119	High	0	765.04	41	38
FALSE	Master Protein	GRMZM2G012631_P01 pep:known chromosome:AGPv3:4:198547817:198551900:-1 gene:GRMZM2G012631 transcript:GRMZM2G012631_T01 description:"cdna	est omrna|protein"	56	49	191	17	1	699	80.3	5.06	64.793	High	0	762.12	49	4
FALSE	Master Protein	AC197672.3_FGP002	pep:known chromosome:AGPv3:10:98149608:98168566:1 gene:AC197672.3_FG002 transcript:AC197672.3_FGT002 description:"abinitio"	37	77	196	18	1	2325	257.1	6.46	6.827	High	0	757.37	77	0
FALSE	Master Protein	GRMZM2G414192_P02	pep:known chromosome:AGPv3:1:247786948:247788296:-1 gene:GRMZM2G414192 transcript:GRMZM2G414192_T02 description:"omrna|protein"	47	8	193	5	1	260	27.8	5.41	55.234	High	0	753.74	8	0
FALSE	Master Protein	GRMZM2G113408_P01 pep:known chromosome:AGPv3:6:163133778:163137313:-1 gene:GRMZM2G113408 transcript:GRMZM2G113408_T01 description:"cdna	est omrna|protein"	55	22	168	4	1	553	59.1	6.42	50.248	High	0	752.2	22	23
FALSE	Master Protein	GRMZM2G021331_P01 pep:known chromosome:AGPv3:8:65484575:65488309:1 gene:GRMZM2G021331 transcript:GRMZM2G021331_T01 description:"cdna	est omrna|protein"	60	22	167	4	1	553	59	6.15	58.456	High	0	749.09	22	0
FALSE	Master Protein	GRMZM2G427369_P01	pep:known chromosome:AGPv3:5:210019289:210020221:-1 gene:GRMZM2G427369 transcript:GRMZM2G427369_T01 description:"omrna|protein"	41	7	142	7	1	227	25.1	5.88	132.352	High	0	742.42	7	0
FALSE	Master Protein	GRMZM2G306732_P01 pep:known chromosome:AGPv3:1:38853117:38855307:-1 gene:GRMZM2G306732 transcript:GRMZM2G306732_T01 description:"cdna	est omrna|protein"	45	18	151	18	1	413	44.5	5.22	161.378	High	0	741.83	18	0
FALSE	Master Protein	GRMZM5G813217_P03	pep:known chromosome:AGPv3:7:129998805:130003537:-1 gene:GRMZM5G813217 transcript:GRMZM5G813217_T03 description:"est"	72	53	165	26	1	708	80.8	4.86	140.963	High	0	733.82	53	31
FALSE	Master Protein	GRMZM2G168143_P01 pep:known chromosome:AGPv3:9:27028016:27030404:1 gene:GRMZM2G168143 transcript:GRMZM2G168143_T01 description:"cdna	est omrna|protein"	59	23	165	11	1	355	39.3	8.32	108.648	High	0	732.23	23	3
FALSE	Master Protein	GRMZM2G348512_P06	pep:known chromosome:AGPv3:3:215512816:215518550:-1 gene:GRMZM2G348512 transcript:GRMZM2G348512_T06 description:"est"	77	17	164	7	1	206	22.7	6.99	364.174	High	0	725.16	17	3
FALSE	Master Protein	GRMZM2G019404_P01 pep:known chromosome:AGPv3:2:4305357:4312331:-1 gene:GRMZM2G019404 transcript:GRMZM2G019404_T01 description:"cdna	est protein"	48	43	172	6	1	951	104.7	6.7	57.171	High	0	721.33	43	0
FALSE	Master Protein	GRMZM6G741210_P01	pep:known chromosome:AGPv3:3:178865444:178897469:-1 gene:GRMZM6G741210 transcript:GRMZM6G741210_T01 description:"cdna"	51	11	159	11	1	271	29.3	5.72	72.564	High	0	718.4	11	0
FALSE	Master Protein	GRMZM2G448174_P01 pep:known chromosome:AGPv3:1:203956036:203962672:-1 gene:GRMZM2G448174 transcript:GRMZM2G448174_T01 description:"cdna	est omrna|protein"	56	20	170	20	1	320	35.4	9.03	315.228	High	0	711.64	20	0
FALSE	Master Protein	GRMZM2G165747_P01 pep:known chromosome:AGPv3:1:259272477:259277810:-1 gene:GRMZM2G165747 transcript:GRMZM2G165747_T01 description:"cdna	est protein"	55	37	155	6	1	765	84.4	6.2	21.23	High	0	708.08	37	0
FALSE	Master Protein	GRMZM2G002220_P01	pep:known chromosome:AGPv3:4:197541805:197546387:-1 gene:GRMZM2G002220 transcript:GRMZM2G002220_T01 description:"est"	65	51	161	24	1	793	89.4	5.11	59.256	High	0	697.62	51	0
FALSE	Master Protein	GRMZM2G117198_P02	pep:known chromosome:AGPv3:8:129154927:129156460:1 gene:GRMZM2G117198 transcript:GRMZM2G117198_T02 description:"omrna|protein"	61	18	132	1	1	421	45.8	6.48	50.09	High	0	692.83	18	21
FALSE	Master Protein	GRMZM2G061135_P01 pep:known chromosome:AGPv3:10:86428340:86432074:1 gene:GRMZM2G061135 transcript:GRMZM2G061135_T01 description:"cdna	est protein"	64	18	130	2	1	397	43	5.91	59.619	High	0	687.87	18	0
FALSE	Master Protein	GRMZM2G428391_P01 pep:known chromosome:AGPv3:1:41105576:41108339:1 gene:GRMZM2G428391 transcript:GRMZM2G428391_T01 description:"cdna	est omrna|protein"	61	38	154	13	1	649	71.1	5.19	59.783	High	0	687.34	38	3
FALSE	Master Protein	GRMZM2G162529_P01 pep:known chromosome:AGPv3:5:199643154:199645484:1 gene:GRMZM2G162529 transcript:GRMZM2G162529_T01 description:"cdna	est omrna|protein"	67	22	150	11	1	405	44.7	6.21	245.209	High	0	683.16	22	14
FALSE	Master Protein	GRMZM2G129513_P01 pep:known chromosome:AGPv3:1:203209824:203213983:-1 gene:GRMZM2G129513 transcript:GRMZM2G129513_T01 description:"cdna	est omrna|protein"	60	27	153	27	1	432	46.8	6.89	77.137	High	0	674.96	27	0
FALSE	Master Protein	GRMZM2G032003_P05	pep:known chromosome:AGPv3:7:146528797:146534984:-1 gene:GRMZM2G032003 transcript:GRMZM2G032003_T05 description:"omrna|protein"	70	28	149	14	1	473	52.1	5.36	68.783	High	0	673.46	28	15
FALSE	Master Protein	GRMZM2G374302_P01 pep:known chromosome:AGPv3:4:144862958:144868207:1 gene:GRMZM2G374302 transcript:GRMZM2G374302_T01 description:"cdna	est protein"	64	37	153	37	1	639	70.7	5.33	81.97	High	0	671.9	37	0
FALSE	Master Protein	GRMZM2G377341_P01 pep:known chromosome:AGPv3:5:38590536:38601853:-1 gene:GRMZM2G377341 transcript:GRMZM2G377341_T01 description:"cdna	est omrna|protein"	46	83	162	72	1	2248	250.9	6.43	8.177	High	0	670.33	83	0
FALSE	Master Protein	GRMZM5G852968_P03	pep:known chromosome:AGPv3:7:143560266:143564142:-1 gene:GRMZM5G852968 transcript:GRMZM5G852968_T03 description:"cdna|est"	56	17	151	3	1	304	32.4	6.55	99	High	0	666.5	17	0
FALSE	Master Protein	GRMZM2G123719_P01 pep:known chromosome:AGPv3:10:133297638:133301147:-1 gene:GRMZM2G123719 transcript:GRMZM2G123719_T01 description:"cdna	est omrna|protein"	57	36	157	5	1	768	84.2	5.49	28.471	High	0	666.12	36	0
FALSE	Master Protein	GRMZM2G357296_P01 pep:known chromosome:AGPv3:6:125424113:125425065:-1 gene:GRMZM2G357296 transcript:GRMZM2G357296_T01 description:"cdna	est omrna|protein"	63	10	188	3	1	155	17.7	9.8	25.102	High	0	665.65	10	0
FALSE	Master Protein	GRMZM2G006894_P01 pep:known chromosome:AGPv3:10:145614824:145621943:1 gene:GRMZM2G006894 transcript:GRMZM2G006894_T01 description:"cdna	est omrna|protein"	48	44	156	6	1	961	105.9	6.84	48.239	High	0	658.48	44	33
FALSE	Master Protein	GRMZM2G054123_P04 pep:known chromosome:AGPv3:8:38416740:38418858:1 gene:GRMZM2G054123 transcript:GRMZM2G054123_T04 description:"cdna	est protein"	62	18	132	5	1	392	42.5	5.82	79.309	High	0	656.09	18	5
FALSE	Master Protein	GRMZM2G057576_P01 pep:known chromosome:AGPv3:10:1135014:1145195:1 gene:GRMZM2G057576 transcript:GRMZM2G057576_T01 description:"cdna	est omrna|protein"	44	71	156	61	1	1707	193	5.35	11.328	High	0	655.69	71	11
FALSE	Master Protein	AC199526.5_FGP002	pep:known chromosome:AGPv3:3:58905868:58907052:-1 gene:AC199526.5_FG002 transcript:AC199526.5_FGT002 description:"abinitio"	62	17	128	4	1	394	42.7	5.94	70.969	High	0	652.55	17	0
FALSE	Master Protein	GRMZM2G087598_P02	pep:known chromosome:AGPv3:6:93157101:93160624:-1 gene:GRMZM2G087598 transcript:GRMZM2G087598_T02 description:"cdna|protein"	58	33	152	5	1	677	72.5	5.92	38.811	High	0	651.49	33	33
FALSE	Master Protein	GRMZM5G870932_P01	pep:known chromosome:AGPv3:9:142082081:142086925:1 gene:GRMZM5G870932 transcript:GRMZM5G870932_T01 description:"est"	57	32	152	14	1	659	72.5	6.76	43.668	High	0	651.16	32	0
FALSE	Master Protein	GRMZM2G047732_P02	pep:known chromosome:AGPv3:8:39133073:39133865:1 gene:GRMZM2G047732 transcript:GRMZM2G047732_T02 description:"cdna|protein"	64	11	183	4	1	155	17.6	9.77	25.102	High	0	643.02	11	7
FALSE	Master Protein	GRMZM2G059191_P01 pep:known chromosome:AGPv3:8:156995161:156998789:-1 gene:GRMZM2G059191 transcript:GRMZM2G059191_T01 description:"cdna	est omrna|protein"	63	25	151	16	1	369	40.7	8.32	107.571	High	0	640.78	25	0
FALSE	Master Protein	GRMZM2G110408_P01 pep:known chromosome:AGPv3:9:110677553:110681978:-1 gene:GRMZM2G110408 transcript:GRMZM2G110408_T01 description:"cdna	est omrna|protein"	56	32	149	4	1	677	72.4	5.92	37.882	High	0	639.44	32	0
FALSE	Master Protein	GRMZM2G008247_P01 pep:known chromosome:AGPv3:10:37762909:37767709:1 gene:GRMZM2G008247 transcript:GRMZM2G008247_T01 description:"cdna	est omrna|protein"	52	28	144	15	1	563	64.1	7.23	48.77	High	0	633.65	28	14
FALSE	Master Protein	GRMZM2G138258_P01 pep:known chromosome:AGPv3:3:147436574:147440207:-1 gene:GRMZM2G138258 transcript:GRMZM2G138258_T01 description:"cdna	est omrna|protein"	42	16	144	16	1	415	43.9	6.39	27.73	High	0	627.58	16	0
FALSE	Master Protein	GRMZM2G057535_P01 pep:known chromosome:AGPv3:7:157638031:157641018:1 gene:GRMZM2G057535 transcript:GRMZM2G057535_T01 description:"cdna	est omrna|protein"	60	22	138	6	1	447	49.3	9.07	20.544	High	0	627.52	22	0
FALSE	Master Protein	GRMZM2G071630_P01 pep:known chromosome:AGPv3:4:133130993:133134382:1 gene:GRMZM2G071630 transcript:GRMZM2G071630_T01 description:"cdna	est omrna"	72	22	155	13	1	337	36.4	7.47	41.17	High	0	622.05	22	0
FALSE	Master Protein	GRMZM2G069095_P01 pep:known chromosome:AGPv3:5:95940968:95948316:-1 gene:GRMZM2G069095 transcript:GRMZM2G069095_T01 description:"cdna	est omrna|protein"	28	23	142	7	1	766	80.1	5.33	28.286	High	0	618.63	23	16
FALSE	Master Protein	GRMZM2G067985_P05	pep:known chromosome:AGPv3:8:134054930:134057182:1 gene:GRMZM2G067985 transcript:GRMZM2G067985_T05 description:"omrna|protein"	63	23	138	4	1	430	47.4	5.58	82.768	High	0	607.7	23	25
FALSE	Master Protein	GRMZM2G047727_P01 pep:known chromosome:AGPv3:2:165736653:165740672:-1 gene:GRMZM2G047727 transcript:GRMZM2G047727_T01 description:"cdna	est omrna|protein"	52	8	176	2	1	129	14.7	9.92	26.826	High	0	605.43	8	0
FALSE	Master Protein	GRMZM2G098290_P02	pep:known chromosome:AGPv3:10:145900776:145906241:-1 gene:GRMZM2G098290 transcript:GRMZM2G098290_T02 description:"cdna|est"	62	20	135	18	1	423	46	6.87	123.52	High	0	598.81	20	2
FALSE	Master Protein	GRMZM2G318635_P01 pep:known chromosome:AGPv3:5:213340251:213350414:-1 gene:GRMZM2G318635 transcript:GRMZM2G318635_T01 description:"cdna	est omrna"	49	76	151	72	1	1764	190.9	6.13	13.077	High	0	596.88	76	4
FALSE	Master Protein	GRMZM2G112149_P02 pep:known chromosome:AGPv3:5:15564376:15569803:-1 gene:GRMZM2G112149 transcript:GRMZM2G112149_T02 description:"cdna	est omrna|protein"	55	40	132	10	1	812	89.6	6.84	22.58	High	0	595	40	14
FALSE	Master Protein	GRMZM2G104310_P01 pep:known chromosome:AGPv3:10:5874253:5880613:1 gene:GRMZM2G104310 transcript:GRMZM2G104310_T01 description:"cdna	est omrna|protein"	56	40	127	40	1	1042	111.9	7.06	25.007	High	0	593.01	40	0
FALSE	Master Protein	GRMZM2G077222_P01 pep:known chromosome:AGPv3:1:300543745:300548443:1 gene:GRMZM2G077222 transcript:GRMZM2G077222_T01 description:"cdna	est omrna|protein"	51	46	139	46	1	919	100.2	4.68	43.242	High	0	586.15	46	0
FALSE	Master Protein	GRMZM2G034152_P01 pep:known chromosome:AGPv3:10:62260920:62265303:-1 gene:GRMZM2G034152 transcript:GRMZM2G034152_T01 description:"cdna	est protein"	63	34	133	33	1	500	56.3	6.05	226.585	High	0	585.99	34	1
FALSE	Master Protein	GRMZM2G010884_P01 pep:known chromosome:AGPv3:9:103446560:103448428:-1 gene:GRMZM2G010884 transcript:GRMZM2G010884_T01 description:"abinitio	cdna est|omrna"	54	11	145	11	1	267	29	8.97	291.864	High	0	579.84	11	0
FALSE	Master Protein	GRMZM2G449496_P01 pep:known chromosome:AGPv3:8:84641808:84644915:1 gene:GRMZM2G449496 transcript:GRMZM2G449496_T01 description:"cdna	est omrna"	69	34	132	34	1	496	51.8	8.37	55.234	High	0	579.4	34	0
FALSE	Master Protein	GRMZM2G434173_P01 pep:known chromosome:AGPv3:1:300067860:300072489:-1 gene:GRMZM2G434173 transcript:GRMZM2G434173_T01 description:"cdna	est omrna|protein"	66	32	132	26	1	584	61.4	5.29	41.813	High	0	577.73	32	0
FALSE	Master Protein	AC207722.2_FGP009	pep:known chromosome:AGPv3:7:147094052:147095217:-1 gene:AC207722.2_FG009 transcript:AC207722.2_FGT009 description:"est"	46	8	161	5	1	262	27.8	5.26	37.312	High	0	577.27	8	0
FALSE	Master Protein	GRMZM2G047055_P03	pep:known chromosome:AGPv3:1:269101022:269103558:1 gene:GRMZM2G047055 transcript:GRMZM2G047055_T03 description:"abinitio|est"	64	22	134	4	1	377	41.8	5.49	99	High	0	576.95	22	0
FALSE	Master Protein	GRMZM2G064302_P01 pep:known chromosome:AGPv3:9:22112240:22116928:1 gene:GRMZM2G064302 transcript:GRMZM2G064302_T01 description:"cdna	est omrna|protein"	72	28	122	14	1	446	48	5.4	67.978	High	0	570.47	28	15
FALSE	Master Protein	GRMZM2G149428_P01 pep:known chromosome:AGPv3:2:220058172:220060652:-1 gene:GRMZM2G149428 transcript:GRMZM2G149428_T01 description:"cdna	est omrna|protein"	58	12	125	12	1	283	30.2	5.71	49.802	High	0	566.7	12	0
FALSE	Master Protein	GRMZM2G131286_P01	pep:known chromosome:AGPv3:2:204498422:204501387:1 gene:GRMZM2G131286 transcript:GRMZM2G131286_T01 description:"cdna|est"	77	23	120	20	1	426	45.7	7.68	82.768	High	0	564.89	23	3
FALSE	Master Protein	GRMZM2G104325_P01 pep:known chromosome:AGPv3:7:14468797:14474919:-1 gene:GRMZM2G104325 transcript:GRMZM2G104325_T01 description:"cdna	est omrna|protein"	53	47	131	27	1	956	105.2	6.95	32	High	0	561.2	47	25
FALSE	Master Protein	GRMZM2G155216_P02 pep:known chromosome:AGPv3:8:70312725:70314459:-1 gene:GRMZM2G155216 transcript:GRMZM2G155216_T02 description:"cdna	est protein"	42	8	152	3	1	302	31.8	6.8	15.379	High	0	557.67	8	2
FALSE	Master Protein	GRMZM2G345493_P02	pep:known chromosome:AGPv3:9:93350461:93352641:1 gene:GRMZM2G345493 transcript:GRMZM2G345493_T02 description:"cdna"	75	22	122	14	1	361	38.2	6.61	89.474	High	0	550.98	22	9
FALSE	Master Protein	GRMZM2G048907_P01 pep:known chromosome:AGPv3:7:152868671:152870546:-1 gene:GRMZM2G048907 transcript:GRMZM2G048907_T01 description:"cdna	est protein"	43	18	130	18	1	419	46.1	8.84	35.747	High	0	543.99	18	0
FALSE	Master Protein	GRMZM2G002807_P01 pep:known chromosome:AGPv3:2:196570628:196574505:-1 gene:GRMZM2G002807 transcript:GRMZM2G002807_T01 description:"cdna	est omrna|protein"	55	17	120	3	1	298	31.6	7.36	75.27	High	0	538.93	17	14
FALSE	Master Protein	GRMZM2G035520_P01 pep:known chromosome:AGPv3:3:93429123:93435133:1 gene:GRMZM2G035520 transcript:GRMZM2G035520_T01 description:"cdna	est protein"	49	44	124	19	1	956	105.4	6.64	29.943	High	0	526.25	44	0
FALSE	Master Protein	GRMZM2G126190_P01 pep:known chromosome:AGPv3:4:214771574:214774269:1 gene:GRMZM2G126190 transcript:GRMZM2G126190_T01 description:"cdna	est omrna|protein"	72	23	118	2	1	377	41.7	5.49	89.852	High	0	522.89	23	0
FALSE	Master Protein	GRMZM2G328908_P01 pep:known chromosome:AGPv3:10:48358863:48361518:1 gene:GRMZM2G328908 transcript:GRMZM2G328908_T01 description:"cdna	est omrna|protein"	68	26	114	13	1	466	51.4	6.55	99	High	0	520.59	26	16
FALSE	Master Protein	GRMZM2G024150_P01 pep:known chromosome:AGPv3:5:3530018:3531150:-1 gene:GRMZM2G024150 transcript:GRMZM2G024150_T01 description:"cdna	est omrna|protein"	57	14	134	3	1	236	25.3	9.86	63.938	High	0	518.06	14	13
FALSE	Master Protein	GRMZM2G030169_P01 pep:known chromosome:AGPv3:5:23036169:23039886:1 gene:GRMZM2G030169 transcript:GRMZM2G030169_T01 description:"abinitio	cdna est|omrna"	72	23	118	2	1	377	41.7	5.49	81.54	High	0	516.52	23	2
FALSE	Master Protein	GRMZM2G023289_P01 pep:known chromosome:AGPv3:1:267953427:267959982:1 gene:GRMZM2G023289 transcript:GRMZM2G023289_T01 description:"cdna	est omrna|protein"	62	34	114	7	1	648	70.4	7.43	37.882	High	0	500.96	34	30
FALSE	Master Protein	GRMZM2G058310_P01 pep:known chromosome:AGPv3:7:155396510:155399710:1 gene:GRMZM2G058310 transcript:GRMZM2G058310_T01 description:"cdna	est omrna|protein"	73	28	113	28	1	488	55.1	5.03	41.17	High	0	493.89	28	0
FALSE	Master Protein	GRMZM2G015989_P02 pep:known chromosome:AGPv3:4:241298119:241302905:-1 gene:GRMZM2G015989 transcript:GRMZM2G015989_T02 description:"abinitio	cdna est"	55	30	123	18	1	605	64.3	5.99	24.719	High	0	493.11	30	0
FALSE	Master Protein	GRMZM2G069542_P01 pep:known chromosome:AGPv3:5:144847481:144855080:-1 gene:GRMZM2G069542 transcript:GRMZM2G069542_T01 description:"cdna	est omrna|protein"	49	43	135	29	1	960	109.4	6.1	7.354	High	0	488.53	43	1
FALSE	Master Protein	GRMZM2G152908_P01 pep:known chromosome:AGPv3:9:122479052:122485725:-1 gene:GRMZM2G152908 transcript:GRMZM2G152908_T01 description:"cdna	est omrna|protein"	50	39	111	33	1	816	92.9	6.48	29.079	High	0	487.79	39	6
FALSE	Master Protein	GRMZM2G116258_P01 pep:known chromosome:AGPv3:6:155783973:155788301:-1 gene:GRMZM2G116258 transcript:GRMZM2G116258_T01 description:"cdna	est omrna|protein"	65	23	118	23	1	474	50.1	6.74	62.096	High	0	485.63	23	0
FALSE	Master Protein	GRMZM2G310431_P01 pep:known chromosome:AGPv3:8:168506539:168509902:-1 gene:GRMZM2G310431 transcript:GRMZM2G310431_T01 description:"cdna	est omrna|protein"	50	33	118	6	1	648	70.8	5.19	40.843	High	0	484.68	33	2
FALSE	Master Protein	GRMZM2G129246_P02 pep:known chromosome:AGPv3:7:5528435:5532236:1 gene:GRMZM2G129246 transcript:GRMZM2G129246_T02 description:"cdna	est omrna|protein"	60	19	118	17	1	369	40	8.98	99	High	0	483.73	19	2
FALSE	Master Protein	GRMZM2G412611_P01	pep:known chromosome:AGPv3:6:110869873:110881843:1 gene:GRMZM2G412611 transcript:GRMZM2G412611_T01 description:"est|protein"	52	63	118	63	1	1469	163.9	5.96	6.197	High	0	483.66	63	0
FALSE	Master Protein	GRMZM2G421857_P01	pep:known chromosome:AGPv3:4:235986863:235992984:-1 gene:GRMZM2G421857 transcript:GRMZM2G421857_T01 description:"est|omrna"	65	39	118	6	1	622	68.5	5.52	40.081	High	0	483.36	39	39
FALSE	Master Protein	GRMZM2G389233_P03	pep:known chromosome:AGPv3:1:202789101:202800959:1 gene:GRMZM2G389233 transcript:GRMZM2G389233_T03 description:"cdna|omrna"	61	43	115	43	1	887	99.5	5.83	19.375	High	0	483.19	43	0
FALSE	Master Protein	GRMZM2G073351_P02 pep:known chromosome:AGPv3:5:24880737:24883770:-1 gene:GRMZM2G073351 transcript:GRMZM2G073351_T02 description:"cdna	est omrna|protein"	72	25	107	5	1	396	42.3	8.98	157.489	High	0	481.38	25	23
FALSE	Master Protein	AC233949.1_FGP004	pep:known chromosome:AGPv3:5:32109702:32114768:-1 gene:AC233949.1_FG004 transcript:AC233949.1_FGT004 description:"abinitio"	60	44	108	4	1	845	94.3	5.26	32.177	High	0	480.07	44	44
FALSE	Master Protein	GRMZM2G324314_P04 pep:known chromosome:AGPv3:2:138942732:138945687:1 gene:GRMZM2G324314 transcript:GRMZM2G324314_T04 description:"cdna	est omrna"	55	31	114	30	1	389	44.6	10.11	157.489	High	0	472.7	31	1
FALSE	Master Protein	GRMZM2G006765_P02	pep:known chromosome:AGPv3:2:140690303:140692762:1 gene:GRMZM2G006765 transcript:GRMZM2G006765_T02 description:"est"	72	23	107	2	1	377	41.7	5.49	73.989	High	0	471.5	23	9
FALSE	Master Protein	GRMZM2G036765_P01 pep:known chromosome:AGPv3:1:237146881:237152159:-1 gene:GRMZM2G036765 transcript:GRMZM2G036765_T01 description:"cdna	est omrna|protein"	62	43	105	3	1	810	89.9	5.17	35.747	High	0	470.94	43	2
FALSE	Master Protein	GRMZM2G105644_P01 pep:known chromosome:AGPv3:5:206940311:206942851:1 gene:GRMZM2G105644 transcript:GRMZM2G105644_T01 description:"cdna	est omrna|protein"	66	30	119	30	1	457	50	9.03	77.805	High	0	470.39	30	0
FALSE	Master Protein	GRMZM2G128877_P02	pep:known chromosome:AGPv3:5:87347943:87360122:1 gene:GRMZM2G128877 transcript:GRMZM2G128877_T02 description:"cdna|omrna"	64	37	115	4	1	622	68.4	5.45	32.322	High	0	467.6	37	0
FALSE	Master Protein	GRMZM2G116689_P03 pep:known chromosome:AGPv3:7:116404655:116408869:1 gene:GRMZM2G116689 transcript:GRMZM2G116689_T03 description:"cdna	est protein"	30	6	145	1	1	153	17.1	6.06	3.125	High	0	467.26	6	0
FALSE	Master Protein	GRMZM2G134264_P01 pep:known chromosome:AGPv3:2:102766801:102769426:-1 gene:GRMZM2G134264 transcript:GRMZM2G134264_T01 description:"cdna	est omrna|protein"	40	17	113	9	1	372	41.1	6.05	30.623	High	0	466.19	17	0
FALSE	Master Protein	GRMZM2G026024_P01 pep:known chromosome:AGPv3:4:159020429:159023347:-1 gene:GRMZM2G026024 transcript:GRMZM2G026024_T01 description:"abinitio	cdna est|omrna"	42	19	108	8	1	582	64.9	8.5	16.191	High	0	465.14	19	0
FALSE	Master Protein	GRMZM5G836910_P01	pep:known chromosome:AGPv3:5:213953336:213958271:1 gene:GRMZM5G836910 transcript:GRMZM5G836910_T01 description:"est"	60	28	117	28	1	459	50.4	8.29	57.434	High	0	464.85	28	0
FALSE	Master Protein	GRMZM2G109383_P01 pep:known chromosome:AGPv3:5:10865997:10872126:-1 gene:GRMZM2G109383 transcript:GRMZM2G109383_T01 description:"cdna	est omrna|protein"	54	32	107	5	1	650	70.7	7.68	24.119	High	0	461.4	32	0
FALSE	Master Protein	GRMZM2G100403_P02	pep:known chromosome:AGPv3:7:10292460:10296266:1 gene:GRMZM2G100403 transcript:GRMZM2G100403_T02 description:"est"	66	24	97	9	1	403	44.3	10.64	36.276	High	0	459.65	24	0
FALSE	Master Protein	GRMZM2G018197_P01 pep:known chromosome:AGPv3:2:234103378:234106002:-1 gene:GRMZM2G018197 transcript:GRMZM2G018197_T01 description:"cdna	est omrna|protein"	64	24	97	6	1	404	44.4	10.51	55.234	High	0	458.91	24	20
FALSE	Master Protein	GRMZM2G040095_P02 pep:known chromosome:AGPv3:2:4192279:4196263:1 gene:GRMZM2G040095 transcript:GRMZM2G040095_T02 description:"cdna	est omrna|protein"	50	39	108	39	1	892	97.3	5.94	16.408	High	0	453.72	39	0
FALSE	Master Protein	GRMZM5G858454_P02	pep:known chromosome:AGPv3:10:96344573:96353240:-1 gene:GRMZM5G858454 transcript:GRMZM5G858454_T02 description:"cdna|est"	50	38	113	3	1	905	98.9	6.48	19.893	High	0	452.19	38	41
FALSE	Master Protein	GRMZM2G391936_P02	pep:known chromosome:AGPv3:1:273514156:273518826:-1 gene:GRMZM2G391936 transcript:GRMZM2G391936_T02 description:"cdna|omrna"	76	34	107	34	1	505	55.3	8.35	50.795	High	0	452.12	34	0
FALSE	Master Protein	GRMZM2G700683_P01	pep:known chromosome:AGPv3:8:138044516:138049451:1 gene:GRMZM2G700683 transcript:GRMZM2G700683_T01 description:"cdna"	49	50	113	13	1	1174	127.2	5.69	13.36	High	0	450.78	50	39
FALSE	Master Protein	GRMZM2G397247_P04 pep:known chromosome:AGPv3:5:58553975:58563282:-1 gene:GRMZM2G397247 transcript:GRMZM2G397247_T04 description:"abinitio	cdna est|omrna|protein"	71	24	109	24	1	426	46.1	6.38	119.226	High	0	448.68	24	0
FALSE	Master Protein	GRMZM2G034243_P01 pep:known chromosome:AGPv3:9:153124447:153126242:-1 gene:GRMZM2G034243 transcript:GRMZM2G034243_T01 description:"cdna	est omrna|protein"	75	19	95	12	1	355	37.9	7.33	123.52	High	0	441.93	19	10
FALSE	Master Protein	GRMZM2G323024_P01 pep:known chromosome:AGPv3:10:147389924:147396098:1 gene:GRMZM2G323024 transcript:GRMZM2G323024_T01 description:"cdna	est omrna|protein"	42	45	100	45	1	1379	152.1	6.3	8.698	High	0	440.82	45	0
FALSE	Master Protein	GRMZM5G856777_P01 pep:known chromosome:AGPv3:Pt:6392:12986:1 gene:GRMZM5G856777 transcript:GRMZM5G856777_T01 description:"est	mrna protein"	24	9	111	9	1	473	51.9	7.03	12.335	High	0	437.13	9	0
FALSE	Master Protein	GRMZM2G009479_P01 pep:known chromosome:AGPv3:5:123239668:123243697:1 gene:GRMZM2G009479 transcript:GRMZM2G009479_T01 description:"cdna	est protein"	32	31	109	13	1	911	102.8	7.03	5.556	High	0	432.69	31	0
FALSE	Master Protein	GRMZM2G085577_P01	pep:known chromosome:AGPv3:3:179031418:179040320:1 gene:GRMZM2G085577 transcript:GRMZM2G085577_T01 description:"est"	53	38	102	38	1	838	94.4	7.28	18.953	High	0	432.43	38	0
FALSE	Master Protein	GRMZM2G124434_P01 pep:known chromosome:AGPv3:1:240922200:240925273:1 gene:GRMZM2G124434 transcript:GRMZM2G124434_T01 description:"cdna	est omrna|protein"	65	25	103	16	1	380	42.9	6.42	74.858	High	0	431.48	25	10
FALSE	Master Protein	GRMZM2G051677_P01	pep:known chromosome:AGPv3:6:3573121:3576022:1 gene:GRMZM2G051677 transcript:GRMZM2G051677_T01 description:"omrna|protein"	71	20	99	20	1	335	35.5	5.58	89.474	High	0	429.68	20	0
FALSE	Master Protein	GRMZM2G023232_P01 pep:known chromosome:AGPv3:6:130528209:130534334:1 gene:GRMZM2G023232 transcript:GRMZM2G023232_T01 description:"cdna	est omrna|protein"	55	47	104	22	1	841	93	5.24	30.623	High	0	428.33	47	27
FALSE	Master Protein	GRMZM2G102838_P01 pep:known chromosome:AGPv3:6:81891034:81893207:1 gene:GRMZM2G102838 transcript:GRMZM2G102838_T01 description:"cdna	est omrna|protein"	54	19	97	19	1	394	43	8.76	17.588	High	0	426.93	19	0
FALSE	Master Protein	GRMZM5G833389_P02	pep:known chromosome:AGPv3:8:170315932:170320657:-1 gene:GRMZM5G833389 transcript:GRMZM5G833389_T02 description:"cdna|est"	62	31	100	9	1	559	60.6	5.53	35.21	High	0	426.79	31	26
FALSE	Master Protein	GRMZM2G085646_P02 pep:novel chromosome:AGPv3:5:5287242:5288719:1 gene:GRMZM2G085646 transcript:GRMZM2G085646_T02 description:"abinitio	cdna est"	43	11	101	11	1	232	24.5	9.48	45.416	High	0	425.39	11	0
FALSE	Master Protein	GRMZM2G114793_P01	pep:known chromosome:AGPv3:5:69354043:69357915:-1 gene:GRMZM2G114793 transcript:GRMZM2G114793_T01 description:"est"	51	36	101	3	1	663	73	5.21	28.854	High	0	423.87	36	33
FALSE	Master Protein	GRMZM2G467338_P02 pep:known chromosome:AGPv3:2:115513871:115520261:-1 gene:GRMZM2G467338 transcript:GRMZM2G467338_T02 description:"cdna	est omrna"	43	36	106	2	1	975	106.6	6.7	11.978	High	0	420.65	36	0
FALSE	Master Protein	AC207890.3_FGP002	pep:known chromosome:AGPv3:4:94458791:94464287:1 gene:AC207890.3_FG002 transcript:AC207890.3_FGT002 description:"abinitio"	60	49	98	16	1	986	108.2	6.89	13.208	High	0	419.35	49	34
FALSE	Master Protein	GRMZM2G153815_P01 pep:known chromosome:AGPv3:5:21719063:21724696:1 gene:GRMZM2G153815 transcript:GRMZM2G153815_T01 description:"cdna	est omrna|protein"	50	30	94	25	1	678	72.6	5.77	14.348	High	0	417.62	30	5
FALSE	Master Protein	GRMZM2G351977_P01	pep:known chromosome:AGPv3:8:141176051:141177936:1 gene:GRMZM2G351977 transcript:GRMZM2G351977_T01 description:"abinitio|omrna"	34	7	115	2	1	264	28	5.66	16.783	High	0	417.59	7	0
FALSE	Master Protein	GRMZM2G048371_P03	pep:known chromosome:AGPv3:1:125081143:125087730:-1 gene:GRMZM2G048371 transcript:GRMZM2G048371_T03 description:"cdna|protein"	74	25	84	16	1	446	48.1	5.82	27.289	High	0	417.38	25	2
FALSE	Master Protein	GRMZM2G053299_P01 pep:known chromosome:AGPv3:1:296102632:296106489:-1 gene:GRMZM2G053299 transcript:GRMZM2G053299_T01 description:"cdna	est omrna|protein"	64	22	100	4	1	377	41.6	5.4	50.09	High	0	415.39	22	0
FALSE	Master Protein	GRMZM2G415007_P01 pep:known chromosome:AGPv3:4:240596989:240600763:1 gene:GRMZM2G415007 transcript:GRMZM2G415007_T01 description:"cdna	est omrna|protein"	49	35	97	1	1	663	73.1	5.24	22.714	High	0	410.13	35	1
FALSE	Master Protein	GRMZM2G162968_P01 pep:known chromosome:AGPv3:9:124293005:124299258:-1 gene:GRMZM2G162968 transcript:GRMZM2G162968_T01 description:"cdna	est omrna|protein"	52	52	102	21	1	974	108.7	7.83	13.586	High	0	409.28	52	31
FALSE	Master Protein	GRMZM2G057823_P01 pep:known chromosome:AGPv3:3:165765568:165768179:1 gene:GRMZM2G057823 transcript:GRMZM2G057823_T01 description:"cdna	est omrna|protein"	68	25	84	3	1	355	38.6	7.61	89.474	High	0	407.2	25	22
FALSE	Master Protein	GRMZM5G875238_P01	pep:known chromosome:AGPv3:8:161465833:161471194:1 gene:GRMZM5G875238 transcript:GRMZM5G875238_T01 description:"mrna"	51	44	92	14	1	1068	118.5	6.67	11.542	High	0	406.33	44	31
FALSE	Master Protein	GRMZM2G136296_P01 pep:known chromosome:AGPv3:5:167101735:167109440:-1 gene:GRMZM2G136296 transcript:GRMZM2G136296_T01 description:"cdna	est omrna|protein"	66	48	97	15	1	901	98.5	7.08	13.384	High	0	405.69	48	0
FALSE	Master Protein	GRMZM2G084279_P01	pep:known chromosome:AGPv3:5:162873335:162876115:1 gene:GRMZM2G084279 transcript:GRMZM2G084279_T01 description:"est"	55	13	90	13	1	294	31.6	7.15	49.802	High	0	404.75	13	0
FALSE	Master Protein	GRMZM2G162748_P01 pep:known chromosome:AGPv3:5:142748781:142750441:-1 gene:GRMZM2G162748 transcript:GRMZM2G162748_T01 description:"cdna	est protein"	56	11	84	4	1	226	24	8.32	30.623	High	0	403.69	11	7
FALSE	Master Protein	GRMZM2G061990_P01 pep:known chromosome:AGPv3:3:219454655:219459655:1 gene:GRMZM2G061990 transcript:GRMZM2G061990_T01 description:"cdna	est omrna|protein"	46	48	101	11	1	1168	126.8	5.52	10.406	High	0	399.67	48	0
FALSE	Master Protein	GRMZM2G038032_P01 pep:known chromosome:AGPv3:6:163078693:163081080:1 gene:GRMZM2G038032 transcript:GRMZM2G038032_T01 description:"cdna	est omrna|protein"	69	17	81	2	1	334	36.2	6.61	34.481	High	0	399.56	17	15
FALSE	Master Protein	GRMZM2G003385_P01 pep:known chromosome:AGPv3:3:185890807:185895517:-1 gene:GRMZM2G003385 transcript:GRMZM2G003385_T01 description:"cdna	est omrna|protein"	55	29	95	5	1	556	60.3	5.77	24.119	High	0	398.26	29	2
FALSE	Master Protein	GRMZM2G116034_P02 pep:known chromosome:AGPv3:5:56805616:56809251:-1 gene:GRMZM2G116034 transcript:GRMZM2G116034_T02 description:"cdna	est omrna|protein"	63	24	95	9	1	414	46.9	5.48	63.223	High	0	398.1	24	18
FALSE	Master Protein	GRMZM2G450762_P01	pep:novel chromosome:AGPv3:1:234715688:234717186:1 gene:GRMZM2G450762 transcript:GRMZM2G450762_T01 description:"ocdna2"	27	6	94	1	1	190	21.1	8.38	22.714	High	0	394	6	0
FALSE	Master Protein	GRMZM2G347056_P01 pep:known chromosome:AGPv3:1:292165519:292171793:-1 gene:GRMZM2G347056 transcript:GRMZM2G347056_T01 description:"cdna	est mrna"	67	36	95	36	1	593	66.4	5.91	35.652	High	0	393.21	36	0
FALSE	Master Protein	GRMZM2G139680_P01 pep:known chromosome:AGPv3:4:110093336:110097464:1 gene:GRMZM2G139680 transcript:GRMZM2G139680_T01 description:"cdna	est omrna|protein"	53	16	93	3	1	260	28.3	6.1	28.552	High	0	392.47	16	13
FALSE	Master Protein	GRMZM2G056500_P01 pep:novel chromosome:AGPv3:2:103380502:103382701:-1 gene:GRMZM2G056500 transcript:GRMZM2G056500_T01 description:"est	omrna protein"	41	18	95	9	1	372	41.1	5.96	56.797	High	0	389.82	18	6
FALSE	Master Protein	GRMZM2G020801_P01 pep:known chromosome:AGPv3:4:28147612:28153503:1 gene:GRMZM2G020801 transcript:GRMZM2G020801_T01 description:"cdna	est omrna|protein"	49	32	93	22	1	797	86.7	6.18	28.936	High	0	385.62	32	5
FALSE	Master Protein	GRMZM2G043822_P03	pep:known chromosome:AGPv3:6:92976618:92979025:-1 gene:GRMZM2G043822 transcript:GRMZM2G043822_T03 description:"omrna|protein"	58	21	87	3	1	445	50	4.86	45.416	High	0	381.13	21	3
FALSE	Master Protein	GRMZM2G085078_P01 pep:known chromosome:AGPv3:3:208411907:208423617:1 gene:GRMZM2G085078 transcript:GRMZM2G085078_T01 description:"cdna	est omrna"	36	60	93	15	1	2187	239	6.86	2.539	High	0	379.7	60	45
FALSE	Master Protein	GRMZM2G351125_P01	pep:known scaffold:AGPv3:scaffold_507:135418:139778:-1 gene:GRMZM2G351125 transcript:GRMZM2G351125_T01 description:"est|mrna"	41	44	91	22	1	1356	145.6	4.51	7.75	High	0	378.97	44	24
FALSE	Master Protein	GRMZM5G864335_P01	pep:known chromosome:AGPv3:5:169882529:169886596:1 gene:GRMZM5G864335 transcript:GRMZM5G864335_T01 description:"est"	53	16	88	3	1	260	28.1	6.1	28.552	High	0	378.65	16	0
FALSE	Master Protein	GRMZM2G079381_P01 pep:known chromosome:AGPv3:4:178613063:178616618:1 gene:GRMZM2G079381 transcript:GRMZM2G079381_T01 description:"cdna	est omrna|protein"	62	30	87	13	1	597	66.1	6.9	17.632	High	0	376.87	30	18
FALSE	Master Protein	GRMZM2G063060_P01 pep:known chromosome:AGPv3:9:152900115:152904836:-1 gene:GRMZM2G063060 transcript:GRMZM2G063060_T01 description:"cdna	est omrna|protein"	54	38	85	2	1	804	89.4	5.26	19.47	High	0	376.19	38	4
FALSE	Master Protein	GRMZM2G415359_P02 pep:known chromosome:AGPv3:1:231398241:231403913:-1 gene:GRMZM2G415359 transcript:GRMZM2G415359_T02 description:"cdna	est omrna|protein"	65	20	88	20	1	332	35.6	6.09	124.893	High	0	376.18	20	0
FALSE	Master Protein	GRMZM2G040477_P01 pep:known chromosome:AGPv3:8:65264847:65267084:1 gene:GRMZM2G040477 transcript:GRMZM2G040477_T01 description:"cdna	est omrna|protein"	65	16	76	1	1	334	36.2	6.61	24.119	High	0	375.92	16	0
FALSE	Master Protein	GRMZM2G017257_P01 pep:known chromosome:AGPv3:9:7187390:7211060:-1 gene:GRMZM2G017257 transcript:GRMZM2G017257_T01 description:"cdna	est omrna|protein"	44	54	93	54	1	1284	141.5	6.74	6.602	High	0	375.42	54	0
FALSE	Master Protein	GRMZM2G016066_P01 pep:known chromosome:AGPv3:2:170192624:170193707:-1 gene:GRMZM2G016066 transcript:GRMZM2G016066_T01 description:"cdna	est omrna|protein"	61	8	75	4	1	139	14.8	9.79	73.989	High	0	375.42	8	4
FALSE	Master Protein	GRMZM2G120619_P01 pep:known chromosome:AGPv3:3:223440715:223442102:1 gene:GRMZM2G120619 transcript:GRMZM2G120619_T01 description:"cdna	est omrna|protein"	52	9	108	3	1	264	28	5.66	16.783	High	0	373.62	9	6
FALSE	Master Protein	GRMZM2G178960_P01 pep:known chromosome:AGPv3:9:151582532:151586407:-1 gene:GRMZM2G178960 transcript:GRMZM2G178960_T01 description:"cdna	est omrna|protein"	43	8	82	8	1	274	29	7.87	18.307	High	0	372.61	8	0
FALSE	Master Protein	GRMZM2G066024_P01 pep:known chromosome:AGPv3:8:162856704:162859417:-1 gene:GRMZM2G066024 transcript:GRMZM2G066024_T01 description:"cdna	est omrna|protein"	72	25	78	3	1	355	38.4	7.3	66.002	High	0	371.73	25	0
FALSE	Master Protein	GRMZM2G104419_P01 pep:novel chromosome:AGPv3:4:235260670:235267150:1 gene:GRMZM2G104419 transcript:GRMZM2G104419_T01 description:"cdna	est omrna|protein"	23	18	86	1	1	767	80.1	5.68	9	High	0	371.43	18	0
FALSE	Master Protein	GRMZM2G101271_P01 pep:known chromosome:AGPv3:5:209727724:209731835:1 gene:GRMZM2G101271 transcript:GRMZM2G101271_T01 description:"cdna	est omrna|protein"	67	28	83	28	1	490	54.9	5.27	34.35	High	0	371.41	28	0
FALSE	Master Protein	GRMZM2G178958_P01 pep:known chromosome:AGPv3:5:213590124:213594002:-1 gene:GRMZM2G178958 transcript:GRMZM2G178958_T01 description:"cdna	est omrna|protein"	51	25	81	23	1	596	61.8	7.72	27.651	High	0	369.29	25	2
FALSE	Master Protein	GRMZM2G145258_P01 pep:known chromosome:AGPv3:9:148369468:148373088:1 gene:GRMZM2G145258 transcript:GRMZM2G145258_T01 description:"cdna	est omrna|protein"	70	24	91	1	1	260	29.7	9.79	76.426	High	0	365.03	24	0
FALSE	Master Protein	GRMZM2G178192_P03	pep:novel chromosome:AGPv3:6:2450158:2455264:-1 gene:GRMZM2G178192 transcript:GRMZM2G178192_T03 description:"est|mrna"	35	12	92	11	1	293	33.6	4.81	17.957	High	0	364.21	12	0
FALSE	Master Protein	GRMZM5G888696_P02	pep:known chromosome:AGPv3:1:228622230:228626047:1 gene:GRMZM5G888696 transcript:GRMZM5G888696_T02 description:"est|mrna"	51	33	90	33	1	604	67.7	5.59	23.245	High	0	363.82	33	0
FALSE	Master Protein	GRMZM2G389118_P01	pep:known chromosome:AGPv3:8:126125230:126129733:1 gene:GRMZM2G389118 transcript:GRMZM2G389118_T01 description:"est|mrna"	35	39	84	17	1	1338	142.9	4.51	5.928	High	0	361.61	39	0
FALSE	Master Protein	GRMZM5G838196_P02	pep:known chromosome:AGPv3:4:58374604:58378154:-1 gene:GRMZM5G838196 transcript:GRMZM5G838196_T02 description:"est"	64	24	82	11	1	471	52	6.8	33.333	High	0	361.21	24	0
FALSE	Master Protein	GRMZM2G026117_P01 pep:known chromosome:AGPv3:5:84284464:84288424:1 gene:GRMZM2G026117 transcript:GRMZM2G026117_T01 description:"cdna	est omrna|protein"	56	19	91	5	1	356	38.4	7.87	30.623	High	0	360.79	19	16
FALSE	Master Protein	GRMZM2G348512_P01 pep:known chromosome:AGPv3:3:215506034:215509064:-1 gene:GRMZM2G348512 transcript:GRMZM2G348512_T01 description:"abinitio	cdna est"	30	5	98	1	1	200	22	6.54	4.817	High	0	360.02	5	0
FALSE	Master Protein	GRMZM2G074604_P01 pep:known chromosome:AGPv3:5:186727239:186730980:-1 gene:GRMZM2G074604 transcript:GRMZM2G074604_T01 description:"cdna	est omrna|protein"	58	36	84	16	1	703	75.4	6.37	20.544	High	0	359.5	36	21
FALSE	Master Protein	AC234515.1_FGP003	pep:known chromosome:AGPv3:5:83593467:83596539:1 gene:AC234515.1_FG003 transcript:AC234515.1_FGT003 description:"abinitio"	55	20	83	1	1	444	49.6	4.94	41.17	High	0	359.09	20	1
FALSE	Master Protein	GRMZM2G036455_P01 pep:known chromosome:AGPv3:1:227569042:227572130:-1 gene:GRMZM2G036455 transcript:GRMZM2G036455_T01 description:"cdna	est omrna|protein"	62	23	84	4	1	396	42.2	8.84	44.066	High	0	358.52	23	0
FALSE	Master Protein	GRMZM2G140432_P01 pep:known chromosome:AGPv3:1:49204323:49213247:1 gene:GRMZM2G140432 transcript:GRMZM2G140432_T01 description:"cdna	est omrna|protein"	50	32	82	32	1	850	95.1	6.23	10.898	High	0	355.84	32	0
FALSE	Master Protein	GRMZM2G030915_P01	pep:known chromosome:AGPv3:9:148335504:148347470:-1 gene:GRMZM2G030915 transcript:GRMZM2G030915_T01 description:"est"	55	24	88	1	1	332	37.1	9.77	29.079	High	0	355.09	24	23
FALSE	Master Protein	GRMZM2G071333_P01 pep:known chromosome:AGPv3:2:3103621:3109679:1 gene:GRMZM2G071333 transcript:GRMZM2G071333_T01 description:"cdna	est omrna|protein"	47	42	82	12	1	1090	123	6.65	8.295	High	0	351.77	42	32
FALSE	Master Protein	GRMZM2G170927_P01 pep:known chromosome:AGPv3:9:95183056:95188412:-1 gene:GRMZM2G170927 transcript:GRMZM2G170927_T01 description:"abinitio	cdna est|omrna"	26	21	84	4	1	771	80.6	5.4	14.615	High	0	350.96	21	3
FALSE	Master Protein	GRMZM2G137409_P01 pep:known chromosome:AGPv3:5:182174564:182181190:-1 gene:GRMZM2G137409 transcript:GRMZM2G137409_T01 description:"cdna	est omrna|protein"	48	34	84	34	1	746	82.2	5.97	13.454	High	0	350	34	0
FALSE	Master Protein	GRMZM2G135283_P04 pep:known chromosome:AGPv3:1:274342102:274347177:1 gene:GRMZM2G135283 transcript:GRMZM2G135283_T04 description:"cdna	est mrna"	58	24	84	24	1	513	56.5	8.51	24.809	High	0	349.78	24	0
FALSE	Master Protein	GRMZM2G106928_P01 pep:known chromosome:AGPv3:1:203627015:203630356:-1 gene:GRMZM2G106928 transcript:GRMZM2G106928_T01 description:"cdna	est omrna|protein"	56	9	65	9	1	206	20.9	5.82	38.811	High	0	349.68	9	0
FALSE	Master Protein	GRMZM2G015967_P01 pep:known chromosome:AGPv3:1:219526880:219530998:-1 gene:GRMZM2G015967 transcript:GRMZM2G015967_T01 description:"cdna	est omrna|protein"	54	19	77	19	1	426	46.6	5.01	32	High	0	346.75	19	0
FALSE	Master Protein	GRMZM2G071790_P01	pep:known chromosome:AGPv3:3:187499362:187503189:-1 gene:GRMZM2G071790 transcript:GRMZM2G071790_T01 description:"cdna|protein"	51	21	81	1	1	496	55.2	5.01	34.938	High	0	346.36	21	24
FALSE	Master Protein	GRMZM2G073054_P02	pep:known chromosome:AGPv3:2:59216710:59226937:1 gene:GRMZM2G073054 transcript:GRMZM2G073054_T02 description:"est|mrna"	52	36	82	36	1	844	94.7	5.55	15.322	High	0	345.37	36	0
FALSE	Master Protein	GRMZM2G144030_P01 pep:known chromosome:AGPv3:7:163041712:163045353:-1 gene:GRMZM2G144030 transcript:GRMZM2G144030_T01 description:"cdna	est omrna|protein"	77	13	70	12	1	160	17.5	5.99	99	High	0	342.78	13	1
FALSE	Master Protein	GRMZM2G020940_P01	pep:known chromosome:AGPv3:1:53618695:53620586:-1 gene:GRMZM2G020940 transcript:GRMZM2G020940_T01 description:"est"	76	24	85	18	1	344	38.4	6.8	39.471	High	0	342.16	24	7
FALSE	Master Protein	GRMZM2G473001_P01 pep:known chromosome:AGPv3:7:86459173:86464913:-1 gene:GRMZM2G473001 transcript:GRMZM2G473001_T01 description:"cdna	est omrna|protein"	51	45	86	29	1	967	110	6.04	5.521	High	0	340.3	45	10
FALSE	Master Protein	GRMZM2G158147_P01 pep:known chromosome:AGPv3:2:113264909:113273161:1 gene:GRMZM2G158147 transcript:GRMZM2G158147_T01 description:"cdna	est omrna|protein"	61	28	86	24	1	475	52.3	8.27	40.753	High	0	340.04	28	4
FALSE	Master Protein	GRMZM2G168149_P01 pep:known chromosome:AGPv3:7:18484063:18486515:1 gene:GRMZM2G168149 transcript:GRMZM2G168149_T01 description:"cdna	est omrna|protein"	57	16	82	5	1	279	30.3	10.11	62.096	High	0	340.02	16	13
FALSE	Master Protein	GRMZM2G074097_P01 pep:known chromosome:AGPv3:3:218917243:218918947:-1 gene:GRMZM2G074097 transcript:GRMZM2G074097_T01 description:"cdna	est omrna|protein"	62	15	80	7	1	355	37.3	5.88	26.213	High	0	340.01	15	14
FALSE	Master Protein	GRMZM2G120563_P07	pep:known chromosome:AGPv3:7:1313192:1318146:-1 gene:GRMZM2G120563 transcript:GRMZM2G120563_T07 description:"cdna|protein"	57	19	90	8	1	399	44.4	6.55	60.897	High	0	339.99	19	0
FALSE	Master Protein	GRMZM2G399284_P03 pep:known chromosome:AGPv3:2:184578630:184584414:-1 gene:GRMZM2G399284 transcript:GRMZM2G399284_T03 description:"cdna	est omrna|protein"	68	17	81	13	1	245	25.6	8.72	67.129	High	0	338.17	17	4
FALSE	Master Protein	GRMZM2G174984_P01 pep:known chromosome:AGPv3:4:27121588:27123964:-1 gene:GRMZM2G174984 transcript:GRMZM2G174984_T01 description:"cdna	est omrna|protein"	33	5	61	5	1	128	13.1	8.97	55.234	High	0	337.71	5	0
FALSE	Master Protein	GRMZM2G022180_P02 pep:known chromosome:AGPv3:10:112603436:112606897:-1 gene:GRMZM2G022180 transcript:GRMZM2G022180_T02 description:"cdna	est omrna|protein"	43	23	85	7	1	532	60.2	4.84	26.123	High	0	336.65	23	0
FALSE	Master Protein	GRMZM2G111818_P04 pep:known chromosome:AGPv3:4:183621709:183628106:-1 gene:GRMZM2G111818 transcript:GRMZM2G111818_T04 description:"cdna	est protein"	48	39	79	11	1	1056	117.3	5.34	7.33	High	0	334.39	39	0
FALSE	Master Protein	GRMZM2G094497_P01 pep:known chromosome:AGPv3:9:79417971:79429938:1 gene:GRMZM2G094497 transcript:GRMZM2G094497_T01 description:"cdna	est omrna|protein"	63	23	76	1	1	487	54.1	5.19	22.95	High	0	333.54	23	26
FALSE	Master Protein	GRMZM2G078641_P01 pep:known chromosome:AGPv3:10:123126089:123130079:1 gene:GRMZM2G078641 transcript:GRMZM2G078641_T01 description:"cdna	est omrna|protein"	70	21	84	2	1	261	29.6	4.81	157.489	High	0	333.31	21	24
FALSE	Master Protein	GRMZM2G306345_P01	pep:novel chromosome:AGPv3:6:146179404:146180805:-1 gene:GRMZM2G306345 transcript:GRMZM2G306345_T01 description:"mrna"	64	9	80	4	1	192	20.8	6.33	30.623	High	0	332.69	9	0
FALSE	Master Protein	GRMZM2G181151_P01 pep:known chromosome:AGPv3:6:104274311:104281719:1 gene:GRMZM2G181151 transcript:GRMZM2G181151_T01 description:"cdna	est protein"	66	23	75	1	1	487	54	5.19	22.95	High	0	331.04	23	0
FALSE	Master Protein	GRMZM2G042636_P02 pep:known chromosome:AGPv3:8:1370893:1374620:-1 gene:GRMZM2G042636 transcript:GRMZM2G042636_T02 description:"est	omrna protein"	57	21	79	2	1	447	50.2	4.83	55.234	High	0	330.98	21	0
FALSE	Master Protein	GRMZM2G154595_P01 pep:known chromosome:AGPv3:6:165831537:165836297:-1 gene:GRMZM2G154595 transcript:GRMZM2G154595_T01 description:"cdna	est omrna|protein"	62	16	63	5	1	340	35.3	8.1	68.519	High	0	330.83	16	12
FALSE	Master Protein	GRMZM2G399073_P02 pep:known chromosome:AGPv3:5:61555816:61563290:-1 gene:GRMZM2G399073 transcript:GRMZM2G399073_T02 description:"abinitio	cdna omrna|protein"	42	43	88	8	1	1001	113.1	5.08	9	High	0	330.82	43	37
FALSE	Master Protein	GRMZM2G163437_P01 pep:known chromosome:AGPv3:1:221701404:221705997:1 gene:GRMZM2G163437 transcript:GRMZM2G163437_T01 description:"cdna	est protein"	65	25	74	25	1	517	56.4	6.95	20.102	High	0	330.36	25	0
FALSE	Master Protein	GRMZM2G172932_P03 pep:known chromosome:AGPv3:8:170881465:170884640:-1 gene:GRMZM2G172932 transcript:GRMZM2G172932_T03 description:"cdna	est omrna|protein"	54	21	77	2	1	476	53.4	4.87	42.652	High	0	330.08	21	0
FALSE	Master Protein	GRMZM2G093050_P01 pep:known chromosome:AGPv3:3:7406103:7414401:1 gene:GRMZM2G093050 transcript:GRMZM2G093050_T01 description:"cdna	est omrna|protein"	43	46	84	31	1	965	111.8	9.17	9.758	High	0	330.03	46	15
FALSE	Master Protein	GRMZM2G122871_P01 pep:known chromosome:AGPv3:6:104230611:104235309:1 gene:GRMZM2G122871 transcript:GRMZM2G122871_T01 description:"cdna	est omrna"	62	24	81	9	1	417	47.1	6.37	55.234	High	0	328.79	24	19
FALSE	Master Protein	GRMZM5G840582_P01	pep:known chromosome:AGPv3:2:236204265:236208701:-1 gene:GRMZM5G840582 transcript:GRMZM5G840582_T01 description:"protein"	59	24	83	12	1	479	53.5	8.41	37.075	High	0	328.25	24	16
FALSE	Master Protein	GRMZM2G416120_P01 pep:known chromosome:AGPv3:1:234834523:234840412:-1 gene:GRMZM2G416120 transcript:GRMZM2G416120_T01 description:"cdna	est omrna|protein"	56	34	78	23	1	576	60.9	5.85	32.711	High	0	327.96	34	11
FALSE	Master Protein	GRMZM2G059580_P02 pep:known chromosome:AGPv3:9:80721754:80725509:-1 gene:GRMZM2G059580 transcript:GRMZM2G059580_T02 description:"cdna	est omrna"	49	19	83	4	1	417	47.2	6.48	30.623	High	0	326.9	19	0
FALSE	Master Protein	GRMZM2G102499_P02	pep:known chromosome:AGPv3:2:41931698:41934869:-1 gene:GRMZM2G102499 transcript:GRMZM2G102499_T02 description:"protein"	63	20	82	1	1	278	31.6	4.94	123.52	High	0	326.77	20	0
FALSE	Master Protein	GRMZM2G025171_P01 pep:known chromosome:AGPv3:4:181459939:181462138:-1 gene:GRMZM2G025171 transcript:GRMZM2G025171_T01 description:"est	omrna protein"	55	11	67	11	1	250	26.7	4.78	45.416	High	0	325.79	11	0
FALSE	Master Protein	GRMZM2G091481_P01 pep:known chromosome:AGPv3:4:14877067:14881858:-1 gene:GRMZM2G091481 transcript:GRMZM2G091481_T01 description:"cdna	est omrna|protein"	60	31	77	18	1	514	56.8	5.15	25.102	High	0	325.41	31	13
FALSE	Master Protein	GRMZM2G038365_P01 pep:known chromosome:AGPv3:4:226804999:226807042:-1 gene:GRMZM2G038365 transcript:GRMZM2G038365_T01 description:"cdna	est omrna|protein"	52	9	67	2	1	227	24	8	21.758	High	0	324.41	9	0
FALSE	Master Protein	GRMZM2G141931_P01 pep:known chromosome:AGPv3:6:83941625:83947219:1 gene:GRMZM2G141931 transcript:GRMZM2G141931_T01 description:"cdna	est omrna|protein"	50	41	87	6	1	804	92.5	5.03	17.197	High	0	322.13	41	0
FALSE	Master Protein	AC198418.3_FGP005	pep:known chromosome:AGPv3:1:295187054:295270267:1 gene:AC198418.3_FG005 transcript:AC198418.3_FGT005 description:"est|protein"	44	28	79	14	1	743	80.1	6.96	10.788	High	0	321.75	28	15
FALSE	Master Protein	GRMZM2G075958_P01 pep:known chromosome:AGPv3:1:12149050:12150530:-1 gene:GRMZM2G075958 transcript:GRMZM2G075958_T01 description:"cdna	est omrna|protein"	72	17	70	10	1	354	37.6	7.37	63.495	High	0	321.32	17	0
FALSE	Master Protein	GRMZM2G066460_P01 pep:known chromosome:AGPv3:6:9206517:9209074:-1 gene:GRMZM2G066460 transcript:GRMZM2G066460_T01 description:"cdna	est omrna|protein"	49	15	73	2	1	319	34.5	5.3	192.07	High	0	321.01	15	14
FALSE	Master Protein	GRMZM2G151041_P01 pep:known chromosome:AGPv3:10:109817358:109823291:1 gene:GRMZM2G151041 transcript:GRMZM2G151041_T01 description:"abinitio	cdna est|protein"	39	36	71	8	1	1025	116	6.95	11.915	High	0	320.01	36	32
FALSE	Master Protein	GRMZM2G077015_P01 pep:novel chromosome:AGPv3:3:136606240:136609821:1 gene:GRMZM2G077015 transcript:GRMZM2G077015_T01 description:"cdna	est omrna|protein"	57	27	76	17	1	570	64.4	8.53	11.664	High	0	320.01	27	0
FALSE	Master Protein	GRMZM2G153184_P01 pep:known chromosome:AGPv3:1:213699824:213701540:-1 gene:GRMZM2G153184 transcript:GRMZM2G153184_T01 description:"cdna	est omrna|protein"	38	7	68	1	1	247	26.9	7.12	12.895	High	0	318.77	7	7
FALSE	Master Protein	AC196475.3_FGP004	pep:known chromosome:AGPv3:4:32278881:32280752:-1 gene:AC196475.3_FG004 transcript:AC196475.3_FGT004 description:"abinitio"	62	18	70	18	1	364	39.5	5.78	48.619	High	0	318.47	18	0
FALSE	Master Protein	GRMZM2G063676_P01 pep:known chromosome:AGPv3:8:89562420:89570381:-1 gene:GRMZM2G063676 transcript:GRMZM2G063676_T01 description:"cdna	est omrna|protein"	49	39	79	15	1	848	93.5	5.43	12.991	High	0	318.17	39	5
FALSE	Master Protein	GRMZM2G164696_P01 pep:known chromosome:AGPv3:1:2036057:2037950:1 gene:GRMZM2G164696 transcript:GRMZM2G164696_T01 description:"abinitio	cdna est|omrna"	50	19	74	2	1	446	50	4.89	37.312	High	0	318.03	19	0
FALSE	Master Protein	GRMZM2G419806_P03 pep:known chromosome:AGPv3:10:9227741:9229786:-1 gene:GRMZM2G419806 transcript:GRMZM2G419806_T03 description:"cdna	est protein"	52	21	72	21	1	459	49.8	6.13	33.333	High	0	317.34	21	0
FALSE	Master Protein	GRMZM2G160268_P02 pep:known chromosome:AGPv3:4:83199508:83200944:1 gene:GRMZM2G160268 transcript:GRMZM2G160268_T02 description:"cdna	est omrna|protein"	39	7	68	1	1	244	26.6	6.8	16.013	High	0	316.31	7	0
FALSE	Master Protein	GRMZM2G029559_P02	pep:known chromosome:AGPv3:5:155282641:155286187:-1 gene:GRMZM2G029559 transcript:GRMZM2G029559_T02 description:"cdna|est"	51	20	81	7	1	414	47	6.73	38.137	High	0	315.13	20	7
FALSE	Master Protein	GRMZM6G711429_P01	pep:known chromosome:AGPv3:5:79145825:79147777:1 gene:GRMZM6G711429 transcript:GRMZM6G711429_T01 description:"cdna"	66	18	74	3	1	286	32.8	7.5	99	High	0	314.56	18	0
FALSE	Master Protein	GRMZM2G018375_P02 pep:known chromosome:AGPv3:8:137677256:137678959:-1 gene:GRMZM2G018375 transcript:GRMZM2G018375_T02 description:"cdna	est omrna|protein"	46	12	75	4	1	354	37.1	5.4	32.405	High	0	313.95	12	0
FALSE	Master Protein	GRMZM2G014240_P01 pep:known chromosome:AGPv3:9:14328479:14333699:-1 gene:GRMZM2G014240 transcript:GRMZM2G014240_T01 description:"abinitio	cdna est|omrna"	24	20	76	2	1	762	79.5	5.4	10.602	High	0	313.03	20	5
FALSE	Master Protein	GRMZM2G335657_P01	pep:known chromosome:AGPv3:8:39214774:39217651:-1 gene:GRMZM2G335657 transcript:GRMZM2G335657_T01 description:"est"	62	24	73	8	1	499	52.6	7.33	34.35	High	0	312.97	24	18
FALSE	Master Protein	GRMZM2G469380_P02 pep:known chromosome:AGPv3:7:173595109:173596932:-1 gene:GRMZM2G469380 transcript:GRMZM2G469380_T02 description:"cdna	est protein"	70	20	73	14	1	337	37.9	7.18	50.09	High	0	312.04	20	1
FALSE	Master Protein	AC210013.4_FGP019	pep:known chromosome:AGPv3:5:3431110:3432691:-1 gene:AC210013.4_FG019 transcript:AC210013.4_FGT019 description:"abinitio"	54	14	75	1	1	274	29.8	10.17	47.329	High	0	311.72	14	2
FALSE	Master Protein	GRMZM2G142413_P01 pep:known chromosome:AGPv3:3:9463310:9465481:1 gene:GRMZM2G142413 transcript:GRMZM2G142413_T01 description:"est	omrna protein"	77	47	76	46	1	600	67.8	4.93	22.714	High	0	310.78	47	1
FALSE	Master Protein	GRMZM2G077333_P01 pep:known chromosome:AGPv3:3:174868242:174870828:-1 gene:GRMZM2G077333 transcript:GRMZM2G077333_T01 description:"cdna	est omrna|protein"	34	8	73	8	1	272	28.4	9.09	5.494	High	0	309.23	8	0
FALSE	Master Protein	GRMZM2G134668_P02 pep:known chromosome:AGPv3:2:62121288:62125114:-1 gene:GRMZM2G134668 transcript:GRMZM2G134668_T02 description:"cdna	est omrna|protein"	46	25	81	9	1	534	60.4	4.86	24.119	High	0	308.83	25	18
FALSE	Master Protein	GRMZM2G053019_P01 pep:known chromosome:AGPv3:2:48742647:48762873:1 gene:GRMZM2G053019 transcript:GRMZM2G053019_T01 description:"cdna	est omrna|protein"	60	25	75	13	1	433	47.4	5.41	60.054	High	0	308.49	25	18
FALSE	Master Protein	GRMZM2G122715_P02 pep:known chromosome:AGPv3:4:165726915:165728931:-1 gene:GRMZM2G122715 transcript:GRMZM2G122715_T02 description:"cdna	est protein"	49	18	73	18	1	395	40	9.64	27.73	High	0	307.27	18	0
FALSE	Master Protein	GRMZM2G082998_P01 pep:known chromosome:AGPv3:1:174010202:174012244:-1 gene:GRMZM2G082998 transcript:GRMZM2G082998_T01 description:"cdna	est omrna|protein"	45	14	67	14	1	350	38.9	9.5	20.544	High	0	305.96	14	0
FALSE	Master Protein	GRMZM2G091155_P02 pep:known chromosome:AGPv3:4:81728938:81732549:-1 gene:GRMZM2G091155 transcript:GRMZM2G091155_T02 description:"cdna	est protein"	71	19	70	1	1	256	28.8	4.84	111.884	High	0	305.76	19	13
FALSE	Master Protein	GRMZM2G067225_P01 pep:known chromosome:AGPv3:9:145603968:145606347:-1 gene:GRMZM2G067225 transcript:GRMZM2G067225_T01 description:"cdna	est omrna|protein"	62	28	76	14	1	482	53	7.01	19.62	High	0	305.62	28	16
FALSE	Master Protein	GRMZM2G179976_P01 pep:known chromosome:AGPv3:4:36155816:36158310:1 gene:GRMZM2G179976 transcript:GRMZM2G179976_T01 description:"cdna	est omrna|protein"	49	15	71	2	1	319	34.5	5.39	137.95	High	0	304.61	15	0
FALSE	Master Protein	GRMZM2G053284_P01 pep:known chromosome:AGPv3:3:175942135:175945164:-1 gene:GRMZM2G053284 transcript:GRMZM2G053284_T01 description:"cdna	est omrna|protein"	49	18	75	4	1	376	41.6	5.31	27.73	High	0	302.34	18	1
FALSE	Master Protein	GRMZM2G165655_P01 pep:known chromosome:AGPv3:6:9618364:9623068:1 gene:GRMZM2G165655 transcript:GRMZM2G165655_T01 description:"cdna	est omrna|protein"	48	21	73	1	1	374	41.2	8.79	52.367	High	0	300.83	21	22
FALSE	Master Protein	GRMZM2G366532_P02 pep:known chromosome:AGPv3:9:139766916:139770264:1 gene:GRMZM2G366532 transcript:GRMZM2G366532_T02 description:"cdna	est omrna|protein"	27	22	73	2	1	782	86.1	7.05	5.127	High	0	299.65	22	0
FALSE	Master Protein	GRMZM2G176397_P01	pep:known chromosome:AGPv3:1:8131181:8143070:-1 gene:GRMZM2G176397 transcript:GRMZM2G176397_T01 description:"cdna|est"	50	30	73	8	1	685	74.3	6.55	18.475	High	0	299.29	30	21
FALSE	Master Protein	GRMZM2G016622_P02 pep:known chromosome:AGPv3:7:38037621:38039486:1 gene:GRMZM2G016622 transcript:GRMZM2G016622_T02 description:"cdna	est omrna|protein"	61	7	62	3	1	136	14.4	9.92	99	High	0	298.83	7	0
FALSE	Master Protein	GRMZM2G057441_P01 pep:known chromosome:AGPv3:10:1152579:1158548:-1 gene:GRMZM2G057441 transcript:GRMZM2G057441_T01 description:"cdna	est omrna|protein"	47	39	72	10	1	1051	116.8	5.34	6.499	High	0	298.75	39	31
FALSE	Master Protein	GRMZM2G096792_P01 pep:novel chromosome:AGPv3:2:172723919:172725083:1 gene:GRMZM2G096792 transcript:GRMZM2G096792_T01 description:"est	omrna protein"	63	6	73	1	1	81	8.9	6.92	55.234	High	0	298.47	6	0
FALSE	Master Protein	GRMZM2G377761_P01 pep:known chromosome:AGPv3:7:8183160:8199889:-1 gene:GRMZM2G377761 transcript:GRMZM2G377761_T01 description:"cdna	est omrna|protein"	42	34	73	34	1	880	95.1	6.01	16.141	High	0	298.1	34	0
FALSE	Master Protein	GRMZM2G161335_P01 pep:known chromosome:AGPv3:1:180333582:180335486:1 gene:GRMZM2G161335 transcript:GRMZM2G161335_T01 description:"cdna	est omrna|protein"	56	19	73	18	1	462	50	5.31	21.909	High	0	297.69	19	2
FALSE	Master Protein	GRMZM2G148200_P01 pep:known chromosome:AGPv3:6:123519256:123524011:1 gene:GRMZM2G148200 transcript:GRMZM2G148200_T01 description:"cdna	est omrna|protein"	20	18	74	2	1	819	85.8	6.27	7.697	High	0	297.61	18	0
FALSE	Master Protein	GRMZM2G127393_P01 pep:known chromosome:AGPv3:10:2657170:2665931:-1 gene:GRMZM2G127393 transcript:GRMZM2G127393_T01 description:"cdna	est omrna|protein"	59	27	66	27	1	528	59.1	5.39	17.957	High	0	294.13	27	0
FALSE	Master Protein	GRMZM2G102829_P01 pep:known chromosome:AGPv3:2:163100314:163106027:1 gene:GRMZM2G102829 transcript:GRMZM2G102829_T01 description:"cdna	est omrna|protein"	54	29	68	28	1	654	71.1	7.69	22.101	High	0	293.44	29	1
FALSE	Master Protein	AC217050.4_FGP006	pep:known chromosome:AGPv3:1:214950175:214951930:-1 gene:AC217050.4_FG006 transcript:AC217050.4_FGT006 description:"abinitio"	71	18	68	4	1	256	28.9	4.88	99	High	0	292.93	18	0
FALSE	Master Protein	GRMZM2G157061_P01 pep:novel chromosome:AGPv3:2:32885571:32890964:1 gene:GRMZM2G157061 transcript:GRMZM2G157061_T01 description:"cdna	est omrna|protein"	60	41	73	26	1	786	86.4	8.19	10.86	High	0	292.48	41	17
FALSE	Master Protein	GRMZM2G039396_P01 pep:known chromosome:AGPv3:8:876212:882478:-1 gene:GRMZM2G039396 transcript:GRMZM2G039396_T01 description:"cdna	est omrna|protein"	64	26	62	26	1	537	57	8.5	30.623	High	0	292.39	26	0
FALSE	Master Protein	GRMZM2G033885_P03	pep:known chromosome:AGPv3:7:157314643:157315956:-1 gene:GRMZM2G033885 transcript:GRMZM2G033885_T03 description:"omrna|protein"	41	13	68	13	1	291	31.4	5.5	62.096	High	0	291.93	13	0
FALSE	Master Protein	GRMZM2G134582_P01 pep:known chromosome:AGPv3:4:230638921:230642641:-1 gene:GRMZM2G134582 transcript:GRMZM2G134582_T01 description:"abinitio	cdna est"	52	19	72	7	1	414	46.9	6.8	32	High	0	291.81	19	0
FALSE	Master Protein	GRMZM2G039841_P01 pep:novel chromosome:AGPv3:5:173433033:173434585:-1 gene:GRMZM2G039841 transcript:GRMZM2G039841_T01 description:"cdna	est omrna|protein"	41	6	73	5	1	231	23.5	4.49	20.544	High	0	291.63	6	1
FALSE	Master Protein	GRMZM5G851266_P01	pep:known chromosome:AGPv3:10:59669631:59671907:1 gene:GRMZM5G851266 transcript:GRMZM5G851266_T01 description:"est"	47	24	67	23	1	613	67	7.9	12.895	High	0	291.48	24	1
FALSE	Master Protein	GRMZM2G009808_P01 pep:known chromosome:AGPv3:9:152030140:152038415:-1 gene:GRMZM2G009808 transcript:GRMZM2G009808_T01 description:"cdna	est omrna|protein"	48	28	68	6	1	685	74.3	6.13	17.632	High	0	289.95	28	0
FALSE	Master Protein	GRMZM2G162282_P01	pep:known chromosome:AGPv3:4:691410:693139:1 gene:GRMZM2G162282 transcript:GRMZM2G162282_T01 description:"abinitio|est"	63	23	66	15	1	463	51	6.25	11.496	High	0	288.81	23	0
FALSE	Master Protein	GRMZM2G540538_P01	pep:known chromosome:AGPv3:5:186567333:186573192:-1 gene:GRMZM2G540538 transcript:GRMZM2G540538_T01 description:"est|mrna"	68	16	60	6	1	342	37.1	5.25	41.813	High	0	288.38	16	11
FALSE	Master Protein	GRMZM2G439339_P04 pep:known chromosome:AGPv3:4:182739482:182777432:1 gene:GRMZM2G439339 transcript:GRMZM2G439339_T04 description:"est	omrna protein"	36	59	71	59	1	1994	225.5	5.11	1.694	High	0	287.61	59	0
FALSE	Master Protein	GRMZM6G300210_P01	pep:known scaffold:AGPv3:scaffold_5:67:905:1 gene:GRMZM6G300210 transcript:GRMZM6G300210_T01 description:"cdna"	77	8	71	8	1	98	11	5.1	99	High	0	287.23	8	0
FALSE	Master Protein	GRMZM5G836250_P03	pep:known chromosome:AGPv3:3:175752699:175755736:-1 gene:GRMZM5G836250 transcript:GRMZM5G836250_T03 description:"est"	62	21	69	13	1	345	37.6	5.88	58.255	High	0	287.17	21	9
FALSE	Master Protein	GRMZM2G080546_P01	pep:known chromosome:AGPv3:9:67315974:67320638:-1 gene:GRMZM2G080546 transcript:GRMZM2G080546_T01 description:"est"	48	21	70	1	1	375	41.3	8.79	42.288	High	0	286.91	21	0
FALSE	Master Protein	GRMZM2G081462_P01	pep:known chromosome:AGPv3:8:1889041:1891415:1 gene:GRMZM2G081462 transcript:GRMZM2G081462_T01 description:"est|mrna"	54	23	69	23	1	408	47.2	8.79	18.307	High	0	285.93	23	0
FALSE	Master Protein	GRMZM2G010054_P01 pep:known chromosome:AGPv3:1:267675524:267680920:-1 gene:GRMZM2G010054 transcript:GRMZM2G010054_T01 description:"cdna	est omrna|protein"	40	40	68	5	1	1218	136.2	6.84	4.248	High	0	285.57	40	36
FALSE	Master Protein	GRMZM2G156861_P01	pep:known chromosome:AGPv3:3:168878655:168882335:1 gene:GRMZM2G156861 transcript:GRMZM2G156861_T01 description:"est"	51	40	74	31	1	873	98.1	6.71	7.599	High	0	284.74	40	9
FALSE	Master Protein	GRMZM2G117870_P01 pep:known chromosome:AGPv3:2:198235698:198249128:1 gene:GRMZM2G117870 transcript:GRMZM2G117870_T01 description:"cdna	est omrna"	39	40	68	17	1	1056	120	6.76	6.12	High	0	284.63	40	24
FALSE	Master Protein	GRMZM2G021846_P01	pep:known chromosome:AGPv3:6:124714110:124733471:1 gene:GRMZM2G021846 transcript:GRMZM2G021846_T01 description:"cdna|est"	47	31	65	29	1	773	84.5	5.86	10.053	High	0	283.1	31	2
FALSE	Master Protein	GRMZM2G090568_P01	pep:known chromosome:AGPv3:1:7153932:7156146:-1 gene:GRMZM2G090568 transcript:GRMZM2G090568_T01 description:"protein"	44	21	66	17	1	531	60.7	6.95	17.478	High	0	282.55	21	1
FALSE	Master Protein	GRMZM2G035017_P01 pep:known chromosome:AGPv3:1:296954940:296957700:-1 gene:GRMZM2G035017 transcript:GRMZM2G035017_T01 description:"cdna	est omrna|protein"	71	21	76	3	1	265	30.2	10.2	123.52	High	0	281.61	21	23
FALSE	Master Protein	GRMZM2G086030_P01 pep:known chromosome:AGPv3:10:144610790:144625026:1 gene:GRMZM2G086030 transcript:GRMZM2G086030_T01 description:"abinitio	cdna est|omrna"	30	46	68	34	1	1682	184.8	7.66	2.379	High	0	281.55	46	8
FALSE	Master Protein	GRMZM2G077054_P01 pep:novel chromosome:AGPv3:8:150740296:150751439:-1 gene:GRMZM2G077054 transcript:GRMZM2G077054_T01 description:"cdna	est omrna|protein"	27	46	71	1	1	2173	237.5	6.67	1.629	High	0	281.39	46	0
FALSE	Master Protein	GRMZM2G156861_P02	pep:known chromosome:AGPv3:3:168738873:168742524:1 gene:GRMZM2G156861 transcript:GRMZM2G156861_T02 description:"est"	51	38	68	29	1	871	98.3	6.7	8.183	High	0	281.33	38	1
FALSE	Master Protein	GRMZM2G000622_P01 pep:known chromosome:AGPv3:1:268624221:268630527:-1 gene:GRMZM2G000622 transcript:GRMZM2G000622_T01 description:"cdna	est omrna|protein"	36	37	64	37	1	1418	155.3	5.43	3.203	High	0	281.24	37	0
FALSE	Master Protein	GRMZM2G099944_P01 pep:known chromosome:AGPv3:1:276495576:276498832:-1 gene:GRMZM2G099944 transcript:GRMZM2G099944_T01 description:"est	omrna protein"	52	19	63	2	1	445	49.9	4.89	27.73	High	0	281.1	19	0
FALSE	Master Protein	GRMZM2G142863_P01 pep:known chromosome:AGPv3:2:69920523:69927087:-1 gene:GRMZM2G142863 transcript:GRMZM2G142863_T01 description:"cdna	est omrna|protein"	38	33	65	4	1	1025	116.1	6.87	9	High	0	280.49	33	1
FALSE	Master Protein	GRMZM2G007695_P01 pep:known chromosome:AGPv3:5:4269184:4271800:1 gene:GRMZM2G007695 transcript:GRMZM2G007695_T01 description:"cdna	est omrna|protein"	57	21	64	5	1	404	44.3	10.59	15.103	High	0	279.62	21	3
FALSE	Master Protein	GRMZM5G824944_P02	pep:known chromosome:AGPv3:7:123509910:123514398:1 gene:GRMZM5G824944 transcript:GRMZM5G824944_T02 description:"est"	45	25	69	25	1	635	67.8	6.95	14.647	High	0	279.58	25	0
FALSE	Master Protein	GRMZM2G066191_P03 pep:known chromosome:AGPv3:5:14869913:14874007:-1 gene:GRMZM2G066191 transcript:GRMZM2G066191_T03 description:"est	omrna protein"	52	19	63	2	1	447	50.1	4.94	32.246	High	0	278.28	19	1
FALSE	Master Protein	GRMZM2G133919_P01	pep:known chromosome:AGPv3:5:216749557:216756161:-1 gene:GRMZM2G133919 transcript:GRMZM2G133919_T01 description:"est"	53	35	67	34	1	779	87.3	6.23	9.462	High	0	277.1	35	1
FALSE	Master Protein	GRMZM2G119175_P01	pep:known chromosome:AGPv3:4:188059569:188065517:-1 gene:GRMZM2G119175 transcript:GRMZM2G119175_T01 description:"cdna|protein"	59	25	63	8	1	527	57.3	6.9	14.459	High	0	276.38	25	23
FALSE	Master Protein	GRMZM2G179941_P01 pep:known chromosome:AGPv3:9:99891500:99902719:1 gene:GRMZM2G179941 transcript:GRMZM2G179941_T01 description:"abinitio	est omrna|protein"	29	29	65	12	1	1238	138.1	6.42	3.235	High	0	276.32	29	18
FALSE	Master Protein	GRMZM2G108766_P03	pep:known chromosome:AGPv3:1:258611131:258615106:-1 gene:GRMZM2G108766 transcript:GRMZM2G108766_T03 description:"cdna|protein"	52	18	62	1	1	445	49.7	4.89	34.112	High	0	275.65	18	0
FALSE	Master Protein	GRMZM2G074300_P01 pep:known chromosome:AGPv3:4:31034038:31036484:1 gene:GRMZM2G074300 transcript:GRMZM2G074300_T01 description:"est	omrna protein"	75	17	65	3	1	228	25.4	9.52	113.505	High	0	274.92	17	17
FALSE	Master Protein	GRMZM2G063592_P01 pep:known chromosome:AGPv3:10:90002693:90014635:-1 gene:GRMZM2G063592 transcript:GRMZM2G063592_T01 description:"cdna	est omrna|protein"	52	24	61	24	1	601	65.6	6	15.298	High	0	274.14	24	0
FALSE	Master Protein	GRMZM2G092427_P02 pep:known chromosome:AGPv3:10:147325724:147327037:1 gene:GRMZM2G092427 transcript:GRMZM2G092427_T02 description:"cdna	est omrna|protein"	51	11	69	8	1	248	26.6	8.31	42.94	High	0	274.13	11	3
FALSE	Master Protein	GRMZM2G537291_P01 pep:known chromosome:AGPv3:2:146828962:146834656:-1 gene:GRMZM2G537291 transcript:GRMZM2G537291_T01 description:"cdna	est omrna|protein"	67	31	62	9	1	640	68.4	7.37	14.672	High	0	273.21	31	24
FALSE	Master Protein	GRMZM2G001918_P01 pep:known chromosome:AGPv3:1:39736525:39741619:1 gene:GRMZM2G001918 transcript:GRMZM2G001918_T01 description:"cdna	est omrna|protein"	38	26	63	19	1	852	91.6	7.77	7.577	High	0	272.23	26	7
FALSE	Master Protein	GRMZM5G872068_P01	pep:known chromosome:AGPv3:5:205293914:205297428:-1 gene:GRMZM5G872068 transcript:GRMZM5G872068_T01 description:"est"	53	17	61	3	1	356	39.3	5.48	114.478	High	0	272.21	17	0
FALSE	Master Protein	GRMZM2G055276_P01 pep:known chromosome:AGPv3:3:202504732:202507982:1 gene:GRMZM2G055276 transcript:GRMZM2G055276_T01 description:"cdna	est protein"	65	25	63	8	1	378	40.4	5.85	70.969	High	0	271.78	25	18
FALSE	Master Protein	GRMZM2G462140_P01	pep:novel chromosome:AGPv3:3:59845170:59852663:-1 gene:GRMZM2G462140 transcript:GRMZM2G462140_T01 description:"est"	57	20	64	4	1	409	43.3	6.48	38.811	High	0	270.37	20	0
FALSE	Master Protein	GRMZM6G729818_P01	pep:novel chromosome:AGPv3:2:198410457:198414756:1 gene:GRMZM6G729818 transcript:GRMZM6G729818_T01 description:"cdna"	58	14	69	1	1	225	24.6	7.25	23.484	High	0	270.15	14	0
FALSE	Master Protein	GRMZM2G127609_P07 pep:known chromosome:AGPv3:9:11084775:11089868:-1 gene:GRMZM2G127609 transcript:GRMZM2G127609_T07 description:"cdna	est omrna"	69	17	57	12	1	246	25.7	8.47	99	High	0	270.06	17	1
FALSE	Master Protein	GRMZM2G094123_P01	pep:known chromosome:AGPv3:4:215745459:215773249:1 gene:GRMZM2G094123 transcript:GRMZM2G094123_T01 description:"est|mrna"	61	29	63	29	1	508	58.1	7.11	33.145	High	0	270.04	29	0
FALSE	Master Protein	GRMZM5G870752_P01	pep:known chromosome:AGPv3:7:136181558:136183995:1 gene:GRMZM5G870752 transcript:GRMZM5G870752_T01 description:"est"	55	21	73	4	1	258	29.4	10.35	99	High	0	269.84	21	18
FALSE	Master Protein	GRMZM5G815553_P01	pep:known chromosome:AGPv3:Pt:111760:112005:-1 gene:GRMZM5G815553 transcript:GRMZM5G815553_T01 description:"protein"	58	6	66	1	1	81	8.9	7.08	55.234	High	0	269.67	6	6
FALSE	Master Protein	GRMZM2G019358_P01	pep:known chromosome:AGPv3:4:229164322:229170448:1 gene:GRMZM2G019358 transcript:GRMZM2G019358_T01 description:"est"	52	23	64	23	1	598	64.9	8.69	11.053	High	0	269.39	23	0
FALSE	Master Protein	GRMZM2G076946_P02 pep:known chromosome:AGPv3:3:136590914:136594609:-1 gene:GRMZM2G076946 transcript:GRMZM2G076946_T02 description:"est	omrna protein"	53	27	69	17	1	567	64.2	7.99	9.593	High	0	269.27	27	7
FALSE	Master Protein	GRMZM2G068952_P01 pep:known chromosome:AGPv3:1:287889161:287892109:-1 gene:GRMZM2G068952 transcript:GRMZM2G068952_T01 description:"cdna	est omrna|protein"	52	19	62	7	1	404	44.4	10.55	13.874	High	0	269.16	19	0
FALSE	Master Protein	GRMZM2G096585_P04 pep:known chromosome:AGPv3:1:192433091:192436994:1 gene:GRMZM2G096585 transcript:GRMZM2G096585_T04 description:"cdna	omrna protein"	43	30	62	27	1	553	61.7	5.29	22.95	High	0	268.97	30	3
FALSE	Master Protein	GRMZM2G054300_P04	pep:known chromosome:AGPv3:9:138678206:138682089:1 gene:GRMZM2G054300 transcript:GRMZM2G054300_T04 description:"omrna"	48	12	65	2	1	299	32.3	6.99	10.103	High	0	267.88	12	11
FALSE	Master Protein	GRMZM2G358059_P01 pep:known chromosome:AGPv3:7:24423090:24427016:-1 gene:GRMZM2G358059 transcript:GRMZM2G358059_T01 description:"cdna	est omrna|protein"	61	31	69	9	1	421	47.9	4.64	40.753	High	0	267.86	31	23
FALSE	Master Protein	GRMZM2G099352_P03 pep:known chromosome:AGPv3:10:75709393:75711794:1 gene:GRMZM2G099352 transcript:GRMZM2G099352_T03 description:"cdna	est omrna|protein"	76	17	61	3	1	229	25.5	9.5	86.333	High	0	267.79	17	0
FALSE	Master Protein	GRMZM2G341058_P01	pep:known chromosome:AGPv3:4:71238732:71243440:1 gene:GRMZM2G341058 transcript:GRMZM2G341058_T01 description:"est|protein"	25	22	60	7	1	950	103.5	6.81	3.448	High	0	267.03	22	0
FALSE	Master Protein	GRMZM2G102959_P01 pep:known chromosome:AGPv3:5:209955746:209958660:-1 gene:GRMZM2G102959 transcript:GRMZM2G102959_T01 description:"cdna	est omrna|protein"	46	25	63	8	1	593	65.9	8.05	6.017	High	0	266.68	25	0
FALSE	Master Protein	GRMZM2G140614_P01 pep:known chromosome:AGPv3:7:127894067:127898910:-1 gene:GRMZM2G140614 transcript:GRMZM2G140614_T01 description:"cdna	est omrna|protein"	62	36	67	14	1	617	67.5	5.99	15.681	High	0	266.58	36	26
FALSE	Master Protein	GRMZM2G036464_P01 pep:known chromosome:AGPv3:4:167111248:167114579:-1 gene:GRMZM2G036464 transcript:GRMZM2G036464_T01 description:"cdna	est omrna|protein"	47	17	61	2	1	356	39.2	5.48	85.596	High	0	265.5	17	16
FALSE	Master Protein	GRMZM2G011101_P01 pep:known chromosome:AGPv3:3:47450743:47466190:-1 gene:GRMZM2G011101 transcript:GRMZM2G011101_T01 description:"est	mrna protein"	44	32	59	3	1	950	104.9	6	5.31	High	0	265.06	32	30
FALSE	Master Protein	GRMZM2G158394_P01 pep:known chromosome:AGPv3:7:176260711:176262411:1 gene:GRMZM2G158394 transcript:GRMZM2G158394_T01 description:"cdna	est omrna|protein"	33	11	65	11	1	263	28.9	8.25	45.416	High	0	264.9	11	0
FALSE	Master Protein	GRMZM2G046841_P01 pep:known chromosome:AGPv3:10:132446112:132447465:-1 gene:GRMZM2G046841 transcript:GRMZM2G046841_T01 description:"cdna	est omrna|protein"	57	11	70	3	1	150	16.1	10.05	198.526	High	0	264.38	11	0
FALSE	Master Protein	GRMZM2G087570_P01	pep:novel chromosome:AGPv3:6:44543202:44546165:-1 gene:GRMZM2G087570 transcript:GRMZM2G087570_T01 description:"est|mrna"	62	15	67	5	1	251	26.4	9.33	86.333	High	0	264.28	15	13
FALSE	Master Protein	GRMZM5G876898_P02	pep:known chromosome:AGPv3:2:8909755:8912742:-1 gene:GRMZM5G876898 transcript:GRMZM5G876898_T02 description:"est"	58	24	60	24	1	432	46.8	7.72	19.962	High	0	263.88	24	0
FALSE	Master Protein	GRMZM2G312910_P02 pep:known chromosome:AGPv3:7:8470473:8472544:1 gene:GRMZM2G312910 transcript:GRMZM2G312910_T02 description:"cdna	est omrna|protein"	66	19	61	19	1	340	37.2	6.07	49.119	High	0	263.71	19	0
FALSE	Master Protein	GRMZM5G837108_P02	pep:known chromosome:AGPv3:5:203603050:203604860:-1 gene:GRMZM5G837108 transcript:GRMZM5G837108_T02 description:"est|protein"	36	14	72	1	1	338	36.8	9.76	19.691	High	0	263.59	14	0
FALSE	Master Protein	GRMZM2G062044_P01 pep:known chromosome:AGPv3:3:178437856:178438413:-1 gene:GRMZM2G062044 transcript:GRMZM2G062044_T01 description:"est	omrna protein"	37	4	53	4	1	83	9.4	4.78	38.811	High	0	263.19	4	0
FALSE	Master Protein	GRMZM2G378906_P01	pep:known chromosome:AGPv3:8:1448324:1454303:1 gene:GRMZM2G378906 transcript:GRMZM2G378906_T01 description:"est|mrna"	41	31	59	2	1	950	105	5.94	5.476	High	0	262.41	31	0
FALSE	Master Protein	GRMZM2G058675_P02	pep:known chromosome:AGPv3:9:34129753:34143728:1 gene:GRMZM2G058675 transcript:GRMZM2G058675_T02 description:"cdna"	49	23	60	20	1	549	59.4	7.15	10.365	High	0	262.38	23	3
FALSE	Master Protein	GRMZM2G099628_P02 pep:known chromosome:AGPv3:1:26684809:26697162:-1 gene:GRMZM2G099628 transcript:GRMZM2G099628_T02 description:"cdna	est omrna|protein"	47	29	62	6	1	800	89.1	7.24	8.085	High	0	261.35	29	0
FALSE	Master Protein	GRMZM5G887303_P01	pep:known chromosome:AGPv3:2:174247572:174250344:-1 gene:GRMZM5G887303 transcript:GRMZM5G887303_T01 description:"est"	46	32	61	2	1	815	91.9	6.2	7.66	High	0	261.33	32	0
FALSE	Master Protein	GRMZM2G100511_P01 pep:known chromosome:AGPv3:9:147538960:147544479:-1 gene:GRMZM2G100511 transcript:GRMZM2G100511_T01 description:"cdna	est omrna|protein"	57	24	61	10	1	530	58.3	6.28	19.535	High	0	260.71	24	15
FALSE	Master Protein	GRMZM5G829778_P01	pep:known chromosome:AGPv3:6:165734052:165737680:1 gene:GRMZM5G829778 transcript:GRMZM5G829778_T01 description:"est"	54	24	64	13	1	415	46.2	6.7	20.544	High	0	260.67	24	12
FALSE	Master Protein	GRMZM2G143450_P01 pep:known chromosome:AGPv3:9:146922931:146931473:1 gene:GRMZM2G143450 transcript:GRMZM2G143450_T01 description:"cdna	est omrna|protein"	49	30	62	7	1	802	89.1	7.5	9	High	0	260.5	30	28
FALSE	Master Protein	GRMZM2G035708_P03 pep:known chromosome:AGPv3:5:208123144:208124766:1 gene:GRMZM2G035708 transcript:GRMZM2G035708_T03 description:"cdna	est omrna|protein"	35	7	59	7	1	226	22.9	8.97	27.48	High	0	260.18	7	0
FALSE	Master Protein	GRMZM2G044074_P02 pep:known chromosome:AGPv3:1:56560198:56563670:1 gene:GRMZM2G044074 transcript:GRMZM2G044074_T02 description:"cdna	est omrna|protein"	45	16	59	16	1	394	43.5	8.12	17.233	High	0	260.01	16	0
FALSE	Master Protein	GRMZM2G004534_P01 pep:known chromosome:AGPv3:10:4697235:4702142:-1 gene:GRMZM2G004534 transcript:GRMZM2G004534_T01 description:"cdna	est omrna|protein"	49	22	60	5	1	527	57.3	6.8	10.325	High	0	259.88	22	0
FALSE	Master Protein	GRMZM2G700188_P04	pep:known chromosome:AGPv3:7:108309686:108416495:-1 gene:GRMZM2G700188 transcript:GRMZM2G700188_T04 description:"est"	55	22	61	21	1	414	43.4	7.52	20.544	High	0	259.59	22	1
FALSE	Master Protein	GRMZM2G164965_P01 pep:known chromosome:AGPv3:1:27501888:27503825:1 gene:GRMZM2G164965 transcript:GRMZM2G164965_T01 description:"cdna	est omrna|protein"	50	17	64	17	1	267	28.2	10.73	114.478	High	0	259.52	17	0
FALSE	Master Protein	GRMZM2G018177_P01 pep:known chromosome:AGPv3:8:14391800:14395986:-1 gene:GRMZM2G018177 transcript:GRMZM2G018177_T01 description:"cdna	est omrna|protein"	68	14	60	7	1	250	26.7	5.19	70.969	High	0	258.7	14	6
FALSE	Master Protein	GRMZM2G444541_P03	pep:known chromosome:AGPv3:3:165553619:165557585:1 gene:GRMZM2G444541 transcript:GRMZM2G444541_T03 description:"est|protein"	46	16	64	7	1	393	45.6	5.82	26.213	High	0	257.92	16	9
FALSE	Master Protein	GRMZM2G057281_P01 pep:known chromosome:AGPv3:7:157607233:157609225:1 gene:GRMZM2G057281 transcript:GRMZM2G057281_T01 description:"cdna	est omrna|protein"	61	10	59	10	1	269	28.8	5.27	48.239	High	0	257.71	10	0
FALSE	Master Protein	GRMZM5G848768_P02	pep:known chromosome:AGPv3:5:215868239:215872073:-1 gene:GRMZM5G848768 transcript:GRMZM5G848768_T02 description:"protein"	63	23	55	23	1	461	47.9	8.28	41.17	High	0	256.79	23	0
FALSE	Master Protein	GRMZM2G012276_P02 pep:known chromosome:AGPv3:6:107906367:107907897:1 gene:GRMZM2G012276 transcript:GRMZM2G012276_T02 description:"cdna	est protein"	54	12	57	12	1	218	23.4	9.7	45.416	High	0	256.78	12	0
FALSE	Master Protein	GRMZM2G131309_P01 pep:novel chromosome:AGPv3:9:93553687:93557972:1 gene:GRMZM2G131309 transcript:GRMZM2G131309_T01 description:"est	omrna protein"	17	16	57	1	1	954	104.2	6.6	3.241	High	0	256.17	16	0
FALSE	Master Protein	GRMZM2G155384_P02 pep:known chromosome:AGPv3:4:238153955:238162596:-1 gene:GRMZM2G155384 transcript:GRMZM2G155384_T02 description:"cdna	est omrna|protein"	44	34	62	26	1	892	97.1	5.21	4.968	High	0	255.45	34	8
FALSE	Master Protein	GRMZM2G125271_P01	pep:known chromosome:AGPv3:5:1489127:1491854:1 gene:GRMZM2G125271 transcript:GRMZM2G125271_T01 description:"cdna|est"	67	19	71	2	1	265	30	10.15	79.309	High	0	255.4	19	0
FALSE	Master Protein	GRMZM2G164020_P01 pep:known chromosome:AGPv3:1:288803887:288805620:1 gene:GRMZM2G164020 transcript:GRMZM2G164020_T01 description:"cdna	est omrna|protein"	26	12	61	7	1	368	38.1	10.49	5.579	High	0	254.95	12	1
FALSE	Master Protein	GRMZM2G047219_P03	pep:known chromosome:AGPv3:8:133611767:133618173:-1 gene:GRMZM2G047219 transcript:GRMZM2G047219_T03 description:"omrna|protein"	62	17	57	14	1	298	31.8	9.04	20.544	High	0	254.92	17	3
FALSE	Master Protein	AC233895.1_FGP001	pep:known chromosome:AGPv3:6:140596596:140599178:1 gene:AC233895.1_FG001 transcript:AC233895.1_FGT001 description:"abinitio"	61	20	63	20	1	394	43.2	7.03	27.943	High	0	254.45	20	0
FALSE	Master Protein	GRMZM2G092719_P01 pep:known chromosome:AGPv3:1:7451481:7453677:-1 gene:GRMZM2G092719 transcript:GRMZM2G092719_T01 description:"cdna	est omrna|protein"	38	13	57	1	1	378	41.3	6.65	14.199	High	0	253.77	13	16
FALSE	Master Protein	GRMZM2G135654_P01 pep:known chromosome:AGPv3:1:194764577:194767711:-1 gene:GRMZM2G135654 transcript:GRMZM2G135654_T01 description:"abinitio	cdna est|omrna"	55	21	69	4	1	257	29.2	10.37	73.989	High	0	253.5	21	0
FALSE	Master Protein	GRMZM2G002178_P01 pep:known chromosome:AGPv3:1:28926395:28928612:1 gene:GRMZM2G002178 transcript:GRMZM2G002178_T01 description:"cdna	est omrna|protein"	55	24	63	10	1	482	53	7.83	9.625	High	0	253.1	24	0
FALSE	Master Protein	GRMZM2G030784_P02	pep:known chromosome:AGPv3:3:17832286:17835897:1 gene:GRMZM2G030784 transcript:GRMZM2G030784_T02 description:"omrna|protein"	46	13	57	4	1	309	33	7.36	19.691	High	0	252.68	13	0
FALSE	Master Protein	GRMZM2G135186_P03 pep:known chromosome:AGPv3:4:163798958:163802031:1 gene:GRMZM2G135186 transcript:GRMZM2G135186_T03 description:"abinitio	cdna est|omrna"	26	14	68	1	1	464	50.9	10.39	9	High	0	252.36	14	16
FALSE	Master Protein	GRMZM2G003883_P01 pep:known chromosome:AGPv3:3:44224072:44229612:-1 gene:GRMZM2G003883 transcript:GRMZM2G003883_T01 description:"cdna	est omrna|protein"	54	22	59	21	1	509	55	7.15	13.84	High	0	252.07	22	1
FALSE	Master Protein	GRMZM2G116282_P02 pep:known chromosome:AGPv3:3:202329202:202332688:-1 gene:GRMZM2G116282 transcript:GRMZM2G116282_T02 description:"cdna	est omrna|protein"	63	23	60	6	1	378	40.4	6.05	63.495	High	0	252	23	0
FALSE	Master Protein	GRMZM2G107089_P01 pep:known chromosome:AGPv3:7:7458916:7464267:1 gene:GRMZM2G107089 transcript:GRMZM2G107089_T01 description:"cdna	est omrna|protein"	54	26	57	26	1	560	61.9	7.12	13.84	High	0	251.92	26	0
FALSE	Master Protein	GRMZM2G137868_P03 pep:known chromosome:AGPv3:1:184941358:184944047:1 gene:GRMZM2G137868 transcript:GRMZM2G137868_T03 description:"abinitio	cdna est|omrna"	54	14	58	2	1	403	44.1	7.2	15.496	High	0	251.58	14	14
FALSE	Master Protein	GRMZM2G159237_P02 pep:known chromosome:AGPv3:2:212162733:212165395:-1 gene:GRMZM2G159237 transcript:GRMZM2G159237_T02 description:"cdna	est protein"	47	13	56	1	1	307	33	5.16	32.839	High	0	251.55	13	0
FALSE	Master Protein	GRMZM2G126821_P01 pep:known chromosome:AGPv3:9:151935786:151938224:-1 gene:GRMZM2G126821 transcript:GRMZM2G126821_T01 description:"cdna	est omrna|protein"	46	13	56	1	1	310	33.6	5.08	32.839	High	0	251.52	13	0
FALSE	Master Protein	GRMZM2G110567_P01 pep:known chromosome:AGPv3:10:92550634:92552658:1 gene:GRMZM2G110567 transcript:GRMZM2G110567_T01 description:"cdna	est omrna|protein"	55	23	63	23	1	516	55.7	4.98	18.513	High	0	251.37	23	0
FALSE	Master Protein	GRMZM2G130121_P01 pep:known chromosome:AGPv3:1:74636581:74639963:1 gene:GRMZM2G130121 transcript:GRMZM2G130121_T01 description:"cdna	est omrna|protein"	56	38	64	9	1	653	73.5	5.57	19.309	High	0	251.33	38	0
FALSE	Master Protein	GRMZM2G071959_P01	pep:known chromosome:AGPv3:7:119943268:119944091:1 gene:GRMZM2G071959 transcript:GRMZM2G071959_T01 description:"est"	61	12	69	2	1	151	16.4	9.99	397.107	High	0	251.21	12	1
FALSE	Master Protein	GRMZM2G063850_P01 pep:known chromosome:AGPv3:4:149195010:149201158:1 gene:GRMZM2G063850 transcript:GRMZM2G063850_T01 description:"cdna	est omrna|protein"	59	34	59	14	1	581	65.3	6.33	8.047	High	0	251.08	34	20
FALSE	Master Protein	GRMZM2G353444_P02 pep:known chromosome:AGPv3:3:8542107:8544078:1 gene:GRMZM2G353444 transcript:GRMZM2G353444_T02 description:"cdna	est protein"	45	21	63	21	1	505	56	6.77	10.498	High	0	249.67	21	0
FALSE	Master Protein	GRMZM2G145715_P01 pep:known chromosome:AGPv3:3:153964271:153968156:-1 gene:GRMZM2G145715 transcript:GRMZM2G145715_T01 description:"cdna	est omrna|protein"	55	24	60	8	1	480	52.6	6.37	19.434	High	0	249.3	24	18
FALSE	Master Protein	GRMZM2G141432_P01 pep:known chromosome:AGPv3:2:215752863:215754422:1 gene:GRMZM2G141432 transcript:GRMZM2G141432_T01 description:"cdna	est omrna|protein"	55	10	67	1	1	152	16.3	10.05	157.489	High	0	249.16	10	0
FALSE	Master Protein	GRMZM2G071450_P01	pep:known chromosome:AGPv3:6:54372730:54374538:1 gene:GRMZM2G071450 transcript:GRMZM2G071450_T01 description:"est|protein"	46	3	56	3	1	155	15.9	5.9	38.811	High	0	249.1	3	0
FALSE	Master Protein	GRMZM2G135132_P01 pep:novel chromosome:AGPv3:4:143110278:143115226:-1 gene:GRMZM2G135132 transcript:GRMZM2G135132_T01 description:"cdna	est omrna|protein"	60	14	52	4	1	342	37	5.08	37.747	High	0	248.91	14	0
FALSE	Master Protein	GRMZM2G014805_P01 pep:known chromosome:AGPv3:3:106351200:106368030:1 gene:GRMZM2G014805 transcript:GRMZM2G014805_T01 description:"cdna	est omrna|protein"	46	44	62	19	1	1122	131.6	5.91	4.671	High	0	248.56	44	26
FALSE	Master Protein	GRMZM2G095124_P01 pep:known chromosome:AGPv3:9:128973883:128980742:1 gene:GRMZM2G095124 transcript:GRMZM2G095124_T01 description:"cdna	est omrna|protein"	39	28	57	19	1	898	99.4	5.07	5.813	High	0	248.39	28	9
FALSE	Master Protein	GRMZM2G082271_P01 pep:known chromosome:AGPv3:10:18129989:18147975:-1 gene:GRMZM2G082271 transcript:GRMZM2G082271_T01 description:"cdna	est omrna|protein"	35	32	60	32	1	1002	109.8	6.76	7.756	High	0	246.3	32	0
FALSE	Master Protein	GRMZM2G096370_P01 pep:known chromosome:AGPv3:5:203290302:203304309:-1 gene:GRMZM2G096370 transcript:GRMZM2G096370_T01 description:"est	omrna protein"	34	38	59	23	1	1223	133.6	7.14	3.594	High	0	246.27	38	15
FALSE	Master Protein	GRMZM2G152466_P01 pep:known chromosome:AGPv3:5:9481738:9485476:-1 gene:GRMZM2G152466 transcript:GRMZM2G152466_T01 description:"cdna	est omrna|protein"	57	21	58	3	1	451	49.7	5.02	30.623	High	0	245.89	21	18
FALSE	Master Protein	GRMZM2G159724_P03 pep:known chromosome:AGPv3:3:201756871:201761835:-1 gene:GRMZM2G159724 transcript:GRMZM2G159724_T03 description:"abinitio	cdna est"	38	20	62	14	1	664	72.8	6.62	6.197	High	0	245.85	20	4
FALSE	Master Protein	GRMZM2G099355_P01 pep:known chromosome:AGPv3:9:16114496:16124685:1 gene:GRMZM2G099355 transcript:GRMZM2G099355_T01 description:"cdna	est omrna|protein"	25	51	64	3	1	2363	275.7	8.75	1.569	High	0	245.29	51	49
FALSE	Master Protein	GRMZM5G892247_P01	pep:known chromosome:AGPv3:Pt:26983:31566:1 gene:GRMZM5G892247 transcript:GRMZM5G892247_T01 description:"protein"	32	43	62	43	1	1527	176	6.65	2.403	High	0	244.91	43	0
FALSE	Master Protein	GRMZM2G168629_P01 pep:known chromosome:AGPv3:4:236906063:236916978:1 gene:GRMZM2G168629 transcript:GRMZM2G168629_T01 description:"cdna	est omrna|protein"	41	46	62	46	1	1219	134.3	6.16	4.412	High	0	243.88	46	0
FALSE	Master Protein	GRMZM2G118462_P01 pep:known chromosome:AGPv3:8:173973120:173978270:1 gene:GRMZM2G118462 transcript:GRMZM2G118462_T01 description:"cdna	est omrna|protein"	45	30	53	15	1	912	101.7	5.39	6.586	High	0	243.45	30	16
FALSE	Master Protein	GRMZM5G821637_P05 pep:known chromosome:AGPv3:1:298766998:298769331:1 gene:GRMZM5G821637 transcript:GRMZM5G821637_T05 description:"cdna	est mrna"	65	15	52	14	1	359	38.3	4.68	32.405	High	0	242.98	15	1
FALSE	Master Protein	GRMZM2G050570_P01 pep:known chromosome:AGPv3:3:206609421:206611387:1 gene:GRMZM2G050570 transcript:GRMZM2G050570_T01 description:"cdna	est omrna|protein"	46	20	55	15	1	527	57.6	6.92	15.819	High	0	242.65	20	5
FALSE	Master Protein	GRMZM5G815894_P03	pep:known chromosome:AGPv3:3:168275428:168278435:-1 gene:GRMZM5G815894 transcript:GRMZM5G815894_T03 description:"est|mrna"	60	20	59	9	1	302	34.4	9.32	49.119	High	0	242.21	20	12
FALSE	Master Protein	GRMZM2G136106_P01 pep:known chromosome:AGPv3:3:56283553:56289706:1 gene:GRMZM2G136106 transcript:GRMZM2G136106_T01 description:"cdna	est omrna|protein"	39	19	56	18	1	563	60.1	8.54	10.721	High	0	242.02	19	1
FALSE	Master Protein	GRMZM2G304575_P02 pep:known chromosome:AGPv3:8:139473583:139474574:-1 gene:GRMZM2G304575 transcript:GRMZM2G304575_T02 description:"abinitio	cdna est|omrna"	59	12	67	2	1	150	16.2	10.02	250.189	High	0	241.65	12	12
FALSE	Master Protein	GRMZM2G415491_P01 pep:known chromosome:AGPv3:5:1933220:1947556:1 gene:GRMZM2G415491 transcript:GRMZM2G415491_T01 description:"cdna	est omrna|protein"	41	25	58	11	1	745	80.3	6.81	6.197	High	0	241.12	25	0
FALSE	Master Protein	GRMZM2G061876_P02	pep:known chromosome:AGPv3:5:128819962:128834551:1 gene:GRMZM2G061876 transcript:GRMZM2G061876_T02 description:"est|protein"	50	28	61	1	1	671	73.7	7.18	10.22	High	0	240.73	28	0
FALSE	Master Protein	GRMZM2G064096_P01 pep:known chromosome:AGPv3:6:123959994:123961169:-1 gene:GRMZM2G064096 transcript:GRMZM2G064096_T01 description:"cdna	est omrna|protein"	25	4	54	4	1	212	21.9	6.51	25.827	High	0	239.71	4	0
FALSE	Master Protein	GRMZM2G005887_P01 pep:known chromosome:AGPv3:1:177054678:177059679:1 gene:GRMZM2G005887 transcript:GRMZM2G005887_T01 description:"abinitio	cdna est|omrna"	64	16	57	15	1	325	34.1	5.81	49.119	High	0	239.1	16	1
FALSE	Master Protein	GRMZM2G411536_P03 pep:known chromosome:AGPv3:3:111568547:111585874:1 gene:GRMZM2G411536 transcript:GRMZM2G411536_T03 description:"cdna	est omrna|protein"	17	51	62	28	1	3634	401	5.29	0.956	High	0	239.01	51	23
FALSE	Master Protein	GRMZM2G137839_P01 pep:known chromosome:AGPv3:1:43682818:43686019:1 gene:GRMZM2G137839 transcript:GRMZM2G137839_T01 description:"cdna	est omrna|protein"	52	11	58	1	1	250	27.4	5.99	13.384	High	0	238.22	11	0
FALSE	Master Protein	GRMZM2G015875_P01	pep:known chromosome:AGPv3:4:161101812:161108392:-1 gene:GRMZM2G015875 transcript:GRMZM2G015875_T01 description:"est|protein"	40	46	61	46	1	1156	132.7	5.2	5.148	High	0	238.05	46	0
FALSE	Master Protein	GRMZM2G074687_P01	pep:novel chromosome:AGPv3:2:170898831:170902781:-1 gene:GRMZM2G074687 transcript:GRMZM2G074687_T01 description:"est"	52	25	60	3	1	418	47.7	4.61	27.072	High	0	237.84	25	0
FALSE	Master Protein	GRMZM2G061876_P01 pep:known chromosome:AGPv3:5:128819962:128834551:1 gene:GRMZM2G061876 transcript:GRMZM2G061876_T01 description:"est	mrna protein"	50	28	60	1	1	670	73.6	7.18	9.593	High	0	237.59	28	29
FALSE	Master Protein	GRMZM2G018074_P01 pep:novel chromosome:AGPv3:7:10370848:10373324:1 gene:GRMZM2G018074 transcript:GRMZM2G018074_T01 description:"est	omrna protein"	43	24	52	11	1	711	77.7	6.52	7.414	High	0	237.55	24	15
FALSE	Master Protein	GRMZM2G046932_P01 pep:known chromosome:AGPv3:1:8967225:8971750:-1 gene:GRMZM2G046932 transcript:GRMZM2G046932_T01 description:"cdna	est omrna|protein"	50	35	62	16	1	715	80.8	7.94	6.705	High	0	237.37	35	19
FALSE	Master Protein	GRMZM2G172369_P03 pep:known chromosome:AGPv3:2:223959594:223980451:1 gene:GRMZM2G172369 transcript:GRMZM2G172369_T03 description:"cdna	est protein"	37	33	61	33	1	1016	113.7	6.29	4.569	High	0	237.18	33	0
FALSE	Master Protein	GRMZM2G027663_P02	pep:known chromosome:AGPv3:1:256626740:256632945:-1 gene:GRMZM2G027663 transcript:GRMZM2G027663_T02 description:"omrna|protein"	41	21	55	21	1	643	71.5	6.27	9	High	0	236.35	21	0
FALSE	Master Protein	GRMZM2G054136_P04 pep:known chromosome:AGPv3:7:166416769:166429807:1 gene:GRMZM2G054136 transcript:GRMZM2G054136_T04 description:"est	omrna protein"	48	19	58	4	1	251	28.6	10.71	55.234	High	0	235.85	19	15
FALSE	Master Protein	GRMZM2G084881_P01 pep:known chromosome:AGPv3:2:166248729:166253814:-1 gene:GRMZM2G084881 transcript:GRMZM2G084881_T01 description:"cdna	est omrna|protein"	46	22	54	22	1	435	46.7	5.59	23.709	High	0	235.41	22	0
FALSE	Master Protein	GRMZM2G081583_P02 pep:known chromosome:AGPv3:4:67824100:67828264:1 gene:GRMZM2G081583 transcript:GRMZM2G081583_T02 description:"abinitio	cdna est|omrna"	36	18	53	18	1	722	78.6	7.97	9.642	High	0	235.27	18	0
FALSE	Master Protein	GRMZM2G149406_P01 pep:known chromosome:AGPv3:5:11097189:11102891:-1 gene:GRMZM2G149406 transcript:GRMZM2G149406_T01 description:"abinitio	est omrna|protein"	36	38	59	4	1	1217	136.2	7.01	3.549	High	0	235.25	38	0
FALSE	Master Protein	GRMZM2G342515_P01 pep:known chromosome:AGPv3:4:160982217:160983377:1 gene:GRMZM2G342515 transcript:GRMZM2G342515_T01 description:"cdna	est omrna|protein"	52	11	66	2	1	154	16.6	10.02	198.526	High	0	235.13	11	0
FALSE	Master Protein	GRMZM2G354804_P02	pep:known chromosome:AGPv3:8:57303748:57305598:-1 gene:GRMZM2G354804 transcript:GRMZM2G354804_T02 description:"protein"	59	16	53	5	1	276	32.2	9.45	28.552	High	0	234.91	16	2
FALSE	Master Protein	GRMZM2G174757_P01 pep:known chromosome:AGPv3:1:96843381:96848104:-1 gene:GRMZM2G174757 transcript:GRMZM2G174757_T01 description:"cdna	est omrna|protein"	43	29	54	29	1	720	82.9	5.22	11.452	High	0	234.82	29	0
FALSE	Master Protein	GRMZM2G076075_P02 pep:novel chromosome:AGPv3:2:188028125:188032381:1 gene:GRMZM2G076075 transcript:GRMZM2G076075_T02 description:"est	omrna protein"	58	31	59	9	1	562	61.5	6.81	13.962	High	0	234.31	31	0
FALSE	Master Protein	GRMZM2G064695_P04	pep:known chromosome:AGPv3:5:186132457:186143100:1 gene:GRMZM2G064695 transcript:GRMZM2G064695_T04 description:"protein"	65	28	61	28	1	422	45.2	6.46	13.678	High	0	233.58	28	0
FALSE	Master Protein	GRMZM2G161969_P01 pep:novel chromosome:AGPv3:4:230727430:230731783:-1 gene:GRMZM2G161969 transcript:GRMZM2G161969_T01 description:"cdna	est omrna|protein"	65	25	56	10	1	368	39.8	6.32	39.616	High	0	233.38	25	16
FALSE	Master Protein	GRMZM2G058948_P01 pep:novel chromosome:AGPv3:2:938581:943930:1 gene:GRMZM2G058948 transcript:GRMZM2G058948_T01 description:"abinitio	est omrna|protein"	37	27	56	23	1	842	90.4	5.21	6.867	High	0	232.93	27	6
FALSE	Master Protein	GRMZM2G127798_P01 pep:known chromosome:AGPv3:6:57903596:57906292:-1 gene:GRMZM2G127798 transcript:GRMZM2G127798_T01 description:"cdna	est omrna|protein"	49	20	57	4	1	482	52.8	6.29	11.589	High	0	232.18	20	0
FALSE	Master Protein	GRMZM2G433801_P01 pep:known chromosome:AGPv3:6:80347574:80364061:-1 gene:GRMZM2G433801 transcript:GRMZM2G433801_T01 description:"est	omrna protein"	23	49	61	1	1	2366	276	8.73	1.448	High	0	231.91	49	0
FALSE	Master Protein	GRMZM2G036921_P01 pep:known chromosome:AGPv3:9:99784773:99786058:-1 gene:GRMZM2G036921 transcript:GRMZM2G036921_T01 description:"cdna	est omrna|protein"	60	12	51	12	1	233	23.7	8.44	53.117	High	0	231.82	12	0
FALSE	Master Protein	GRMZM2G140150_P01	pep:known chromosome:AGPv3:5:205833927:205838509:-1 gene:GRMZM2G140150 transcript:GRMZM2G140150_T01 description:"est"	64	26	53	6	1	390	42.7	8	45.416	High	0	231.2	26	26
FALSE	Master Protein	GRMZM2G130062_P01 pep:known chromosome:AGPv3:10:1728667:1734854:-1 gene:GRMZM2G130062 transcript:GRMZM2G130062_T01 description:"cdna	est omrna|protein"	56	28	54	13	1	626	67.3	7.27	10.159	High	0	231.03	28	0
FALSE	Master Protein	GRMZM2G163081_P01 pep:known chromosome:AGPv3:8:163737203:163740608:-1 gene:GRMZM2G163081 transcript:GRMZM2G163081_T01 description:"cdna	est omrna"	60	18	54	7	1	302	34.4	9.33	27.184	High	0	230.99	18	0
FALSE	Master Protein	GRMZM2G022269_P01 pep:known chromosome:AGPv3:1:298487571:298492926:-1 gene:GRMZM2G022269 transcript:GRMZM2G022269_T01 description:"cdna	est omrna|protein"	60	21	52	5	1	452	48.5	6.55	12.46	High	0	230.96	21	16
FALSE	Master Protein	GRMZM2G553314_P01	pep:known chromosome:AGPv3:5:14769808:14778577:1 gene:GRMZM2G553314 transcript:GRMZM2G553314_T01 description:"est"	47	30	59	30	1	739	84.4	7.09	8.085	High	0	230.67	30	0
FALSE	Master Protein	GRMZM2G345493_P03	pep:known chromosome:AGPv3:9:93350631:93352641:1 gene:GRMZM2G345493 transcript:GRMZM2G345493_T03 description:"est|mrna"	81	9	52	1	1	131	13.8	8.97	176.828	High	0	230.3	9	0
FALSE	Master Protein	GRMZM2G328500_P01	pep:known chromosome:AGPv3:1:278196990:278199532:1 gene:GRMZM2G328500 transcript:GRMZM2G328500_T01 description:"cdna|est"	61	23	51	6	1	507	56.1	6.65	8.427	High	0	230.15	23	17
FALSE	Master Protein	GRMZM2G432128_P01 pep:known chromosome:AGPv3:8:147224301:147229189:-1 gene:GRMZM2G432128 transcript:GRMZM2G432128_T01 description:"cdna	est omrna|protein"	57	24	57	13	1	412	46.2	6.55	17.478	High	0	229.96	24	0
FALSE	Master Protein	GRMZM2G101875_P01 pep:known chromosome:AGPv3:10:85201886:85207308:-1 gene:GRMZM2G101875 transcript:GRMZM2G101875_T01 description:"est	omrna protein"	46	27	57	27	1	670	75	7.59	10.159	High	0	229.62	27	0
FALSE	Master Protein	GRMZM2G140107_P01	pep:novel chromosome:AGPv3:3:161295516:161301138:1 gene:GRMZM2G140107 transcript:GRMZM2G140107_T01 description:"est"	24	28	58	1	1	1127	124.6	6.68	3.125	High	0	229.16	28	0
FALSE	Master Protein	GRMZM2G176998_P01 pep:known chromosome:AGPv3:10:92146425:92149043:-1 gene:GRMZM2G176998 transcript:GRMZM2G176998_T01 description:"cdna	est omrna|protein"	45	24	54	24	1	730	80.8	7.11	6.499	High	0	229.11	24	0
FALSE	Master Protein	GRMZM2G007038_P01	pep:known chromosome:AGPv3:6:141876885:141881260:1 gene:GRMZM2G007038 transcript:GRMZM2G007038_T01 description:"est"	43	19	56	19	1	522	55.4	5.19	13.251	High	0	228.69	19	0
FALSE	Master Protein	GRMZM2G056975_P01 pep:known chromosome:AGPv3:3:30227477:30234031:1 gene:GRMZM2G056975 transcript:GRMZM2G056975_T01 description:"cdna	est omrna|protein"	61	22	50	6	1	472	51.2	6.9	13.874	High	0	228.19	22	17
FALSE	Master Protein	GRMZM2G078756_P01 pep:known chromosome:AGPv3:3:200258553:200262717:1 gene:GRMZM2G078756 transcript:GRMZM2G078756_T01 description:"cdna	est omrna|protein"	57	24	55	10	1	447	50.8	7.31	18.513	High	0	227.89	24	16
FALSE	Master Protein	GRMZM2G087041_P01 pep:known chromosome:AGPv3:7:71404849:71406722:-1 gene:GRMZM2G087041 transcript:GRMZM2G087041_T01 description:"est	omrna protein"	57	12	54	12	1	239	25.8	8.7	24.809	High	0	227.88	12	0
FALSE	Master Protein	GRMZM2G110504_P01 pep:known chromosome:AGPv3:8:6920228:6921126:1 gene:GRMZM2G110504 transcript:GRMZM2G110504_T01 description:"cdna	est omrna|protein"	78	12	44	12	1	165	16.4	4.79	57.78	High	0	227.79	12	0
FALSE	Master Protein	GRMZM2G331368_P02 pep:known chromosome:AGPv3:10:20707761:20724390:-1 gene:GRMZM2G331368 transcript:GRMZM2G331368_T02 description:"est	omrna protein"	18	50	59	27	1	3645	402.2	5.35	0.842	High	0	227.41	50	0
FALSE	Master Protein	GRMZM5G862540_P01 pep:known chromosome:AGPv3:5:6694299:6697188:1 gene:GRMZM5G862540 transcript:GRMZM5G862540_T01 description:"cdna	est mrna"	65	23	51	6	1	480	52.9	6	9	High	0	226.52	23	0
FALSE	Master Protein	GRMZM2G162426_P01 pep:known chromosome:AGPv3:9:139025595:139031089:1 gene:GRMZM2G162426 transcript:GRMZM2G162426_T01 description:"cdna	est omrna|protein"	41	36	56	15	1	1062	115.5	5.49	6.378	High	0	226.1	36	22
FALSE	Master Protein	GRMZM5G825759_P01	pep:known chromosome:AGPv3:9:139449305:139450253:1 gene:GRMZM5G825759 transcript:GRMZM5G825759_T01 description:"mrna"	43	13	52	13	1	216	22.7	5.53	33.551	High	0	225.31	13	0
FALSE	Master Protein	GRMZM2G353213_P02	pep:known chromosome:AGPv3:10:118014969:118022281:-1 gene:GRMZM2G353213 transcript:GRMZM2G353213_T02 description:"cdna"	52	20	54	8	1	450	49	5.22	17.874	High	0	225.15	20	0
FALSE	Master Protein	GRMZM2G111216_P01 pep:known chromosome:AGPv3:7:19634413:19636498:-1 gene:GRMZM2G111216 transcript:GRMZM2G111216_T01 description:"est	omrna protein"	54	16	47	15	1	403	41.9	8	13.678	High	0	225.09	16	0
FALSE	Master Protein	GRMZM2G010328_P01 pep:known chromosome:AGPv3:1:46857180:46866458:1 gene:GRMZM2G010328 transcript:GRMZM2G010328_T01 description:"cdna	est omrna|protein"	60	19	54	19	1	462	49.7	6.98	11.798	High	0	224.44	19	0
FALSE	Master Protein	GRMZM2G027875_P01 pep:known chromosome:AGPv3:5:155990801:156000188:1 gene:GRMZM2G027875 transcript:GRMZM2G027875_T01 description:"abinitio	cdna est|omrna"	37	30	60	30	1	849	95.5	5.66	5.918	High	0	224.4	30	0
FALSE	Master Protein	GRMZM2G090718_P01 pep:known chromosome:AGPv3:5:210643769:210647890:-1 gene:GRMZM2G090718 transcript:GRMZM2G090718_T01 description:"est	omrna protein"	53	9	57	9	1	147	16.3	9.6	150.991	High	0	224.14	9	0
FALSE	Master Protein	GRMZM2G098370_P02	pep:known chromosome:AGPv3:5:70069693:70074019:-1 gene:GRMZM2G098370 transcript:GRMZM2G098370_T02 description:"omrna|protein"	50	17	59	10	1	467	51.3	6.04	4.623	High	0	224.08	17	0
FALSE	Master Protein	GRMZM2G138907_P01 pep:known chromosome:AGPv3:4:9763231:9767123:1 gene:GRMZM2G138907 transcript:GRMZM2G138907_T01 description:"cdna	est omrna|protein"	51	17	57	8	1	371	42	6.47	11.115	High	0	224.04	17	0
FALSE	Master Protein	GRMZM2G062738_P01 pep:known chromosome:AGPv3:6:166141772:166146276:-1 gene:GRMZM2G062738 transcript:GRMZM2G062738_T01 description:"cdna	est omrna"	45	35	56	35	1	921	102.6	6.71	4.946	High	0	223.9	35	0
FALSE	Master Protein	GRMZM2G435373_P01	pep:known chromosome:AGPv3:8:103444219:103453052:-1 gene:GRMZM2G435373 transcript:GRMZM2G435373_T01 description:"est"	63	24	50	5	1	445	49.9	5.76	30.623	High	0	223.84	24	0
FALSE	Master Protein	GRMZM2G057852_P01 pep:known chromosome:AGPv3:2:183846599:183847686:1 gene:GRMZM2G057852 transcript:GRMZM2G057852_T01 description:"cdna	est omrna|protein"	57	11	63	2	1	152	16.4	10.05	124.893	High	0	223.67	11	0
FALSE	Master Protein	GRMZM2G163939_P01 pep:known chromosome:AGPv3:3:16571066:16572748:1 gene:GRMZM2G163939 transcript:GRMZM2G163939_T01 description:"cdna	est protein"	54	10	61	2	1	149	16	10.08	214.443	High	0	223.41	10	0
FALSE	Master Protein	GRMZM2G136522_P01 pep:known chromosome:AGPv3:7:170896341:170901308:1 gene:GRMZM2G136522 transcript:GRMZM2G136522_T01 description:"cdna	est protein"	50	24	51	24	1	523	56.7	6.83	11.798	High	0	223.2	24	0
FALSE	Master Protein	GRMZM2G035268_P03	pep:known chromosome:AGPv3:4:84132940:84137970:-1 gene:GRMZM2G035268 transcript:GRMZM2G035268_T03 description:"omrna|protein"	52	23	60	23	1	498	53.3	7.2	14.399	High	0	222.9	23	0
FALSE	Master Protein	GRMZM5G864319_P01	pep:known chromosome:AGPv3:9:17322355:17328641:1 gene:GRMZM5G864319 transcript:GRMZM5G864319_T01 description:"est"	46	27	54	18	1	667	74.2	7.53	7.516	High	0	222.85	27	9
FALSE	Master Protein	GRMZM2G060659_P02 pep:known chromosome:AGPv3:5:64797549:64801915:-1 gene:GRMZM2G060659 transcript:GRMZM2G060659_T02 description:"cdna	est omrna|protein"	33	27	56	22	1	857	97.7	8.02	6.543	High	0	222.56	27	4
FALSE	Master Protein	GRMZM2G041159_P01 pep:known chromosome:AGPv3:4:236714717:236718993:-1 gene:GRMZM2G041159 transcript:GRMZM2G041159_T01 description:"cdna	est protein"	54	18	58	4	1	356	38.5	7.64	14.849	High	0	221.5	18	0
FALSE	Master Protein	GRMZM2G408768_P01 pep:known chromosome:AGPv3:2:225571322:225574644:1 gene:GRMZM2G408768 transcript:GRMZM2G408768_T01 description:"cdna	est omrna|protein"	69	18	50	3	1	266	29.3	4.87	32.405	High	0	221.49	18	9
FALSE	Master Protein	GRMZM2G145854_P01 pep:known chromosome:AGPv3:5:10792003:10795994:1 gene:GRMZM2G145854 transcript:GRMZM2G145854_T01 description:"cdna	est omrna|protein"	44	24	50	4	1	743	80.6	6.49	7.072	High	0	221.49	24	0
FALSE	Master Protein	GRMZM2G147687_P04	pep:known chromosome:AGPv3:1:276373564:276377603:1 gene:GRMZM2G147687 transcript:GRMZM2G147687_T04 description:"est|protein"	36	19	51	14	1	657	71.1	8.16	8.326	High	0	221.48	19	5
FALSE	Master Protein	GRMZM2G016890_P01 pep:known chromosome:AGPv3:10:34240659:34246077:1 gene:GRMZM2G016890 transcript:GRMZM2G016890_T01 description:"cdna	est protein"	44	21	53	9	1	566	64.2	6.7	9	High	0	221.1	21	0
FALSE	Master Protein	GRMZM2G079089_P01 pep:known chromosome:AGPv3:3:219419739:219421147:-1 gene:GRMZM2G079089 transcript:GRMZM2G079089_T01 description:"abinitio	cdna est|omrna|protein"	56	11	62	2	1	148	16.1	10.05	214.443	High	0	220.38	11	2
FALSE	Master Protein	GRMZM2G061969_P01 pep:known chromosome:AGPv3:8:17391163:17395926:-1 gene:GRMZM2G061969 transcript:GRMZM2G061969_T01 description:"cdna	est omrna|protein"	45	28	51	14	1	812	92.2	5.69	6.197	High	0	220.27	28	16
FALSE	Master Protein	GRMZM2G162688_P01 pep:known chromosome:AGPv3:5:189871925:189879082:1 gene:GRMZM2G162688 transcript:GRMZM2G162688_T01 description:"cdna	est omrna|protein"	61	34	55	14	1	580	65.4	6.73	8.512	High	0	220.13	34	1
FALSE	Master Protein	GRMZM2G172322_P01 pep:known chromosome:AGPv3:1:12985602:12991971:1 gene:GRMZM2G172322 transcript:GRMZM2G172322_T01 description:"cdna	est omrna|protein"	51	25	52	25	1	550	59.2	7.36	10.406	High	0	219.55	25	0
FALSE	Master Protein	GRMZM5G886257_P01	pep:known chromosome:AGPv3:6:130314704:130318327:1 gene:GRMZM5G886257 transcript:GRMZM5G886257_T01 description:"est"	27	14	54	10	1	570	62.9	5.99	3.252	High	0	219.55	14	0
FALSE	Master Protein	GRMZM2G026991_P01	pep:known chromosome:AGPv3:7:168953773:168962368:-1 gene:GRMZM2G026991 transcript:GRMZM2G026991_T01 description:"est|mrna"	22	44	56	44	1	2203	248.5	5.94	1.69	High	0	219.16	44	0
FALSE	Master Protein	GRMZM2G004880_P01 pep:known chromosome:AGPv3:7:154456734:154460237:1 gene:GRMZM2G004880 transcript:GRMZM2G004880_T01 description:"abinitio	cdna est|omrna"	51	15	49	12	1	420	45.4	7.49	23.041	High	0	218.83	15	0
FALSE	Master Protein	GRMZM2G083243_P01 pep:known chromosome:AGPv3:7:160071867:160075599:1 gene:GRMZM2G083243 transcript:GRMZM2G083243_T01 description:"cdna	est omrna|protein"	53	20	51	4	1	450	49.6	5.06	27.48	High	0	218.7	20	2
FALSE	Master Protein	GRMZM2G092311_P02 pep:novel chromosome:AGPv3:5:85425435:85426468:1 gene:GRMZM2G092311 transcript:GRMZM2G092311_T02 description:"cdna	est omrna|protein"	21	10	56	7	1	273	29.1	5.83	277.256	High	0	218.44	10	3
FALSE	Master Protein	GRMZM2G121612_P01 pep:known chromosome:AGPv3:10:142347313:142356351:1 gene:GRMZM2G121612 transcript:GRMZM2G121612_T01 description:"cdna	est omrna|protein"	34	33	55	32	1	1191	133.9	5.63	3.532	High	0	217.31	33	1
FALSE	Master Protein	GRMZM2G348666_P01 pep:known chromosome:AGPv3:9:94453571:94475198:-1 gene:GRMZM2G348666 transcript:GRMZM2G348666_T01 description:"cdna	est omrna|protein"	35	35	51	23	1	1172	132.8	6.42	3.166	High	0	217.05	35	13
FALSE	Master Protein	GRMZM2G160541_P02 pep:novel chromosome:AGPv3:4:143404749:143408521:-1 gene:GRMZM2G160541 transcript:GRMZM2G160541_T02 description:"cdna	est omrna|protein"	48	19	48	2	1	508	54.1	6.48	12.043	High	0	216.81	19	0
FALSE	Master Protein	GRMZM2G025854_P04 pep:novel chromosome:AGPv3:3:218346635:218354465:1 gene:GRMZM2G025854 transcript:GRMZM2G025854_T04 description:"cdna	est omrna|protein"	48	20	53	20	1	605	65.8	6.37	9	High	0	216.56	20	0
FALSE	Master Protein	GRMZM2G118286_P01 pep:known chromosome:AGPv3:10:9383491:9407372:1 gene:GRMZM2G118286 transcript:GRMZM2G118286_T01 description:"cdna	est protein"	43	22	50	19	1	698	76.7	7.03	8.38	High	0	216.23	22	3
FALSE	Master Protein	GRMZM5G851698_P02	pep:known chromosome:AGPv3:2:212801569:212804466:1 gene:GRMZM5G851698 transcript:GRMZM5G851698_T02 description:"est|mrna"	45	16	52	1	1	251	28.5	10.71	35.517	High	0	215.67	16	0
FALSE	Master Protein	GRMZM2G015132_P01 pep:known chromosome:AGPv3:5:155570391:155577785:-1 gene:GRMZM2G015132 transcript:GRMZM2G015132_T01 description:"cdna	est omrna|protein"	43	23	53	8	1	542	58.3	7.2	13.497	High	0	215.42	23	0
FALSE	Master Protein	GRMZM2G074282_P02 pep:known chromosome:AGPv3:5:66455376:66458642:-1 gene:GRMZM2G074282 transcript:GRMZM2G074282_T02 description:"cdna	est omrna|protein"	62	19	50	19	1	406	44.3	7.08	20.544	High	0	215.4	19	0
FALSE	Master Protein	GRMZM2G166646_P01 pep:known chromosome:AGPv3:3:6927923:6932618:-1 gene:GRMZM2G166646 transcript:GRMZM2G166646_T01 description:"cdna	est protein"	59	20	47	17	1	505	54.1	6.64	14.849	High	0	214.9	20	3
FALSE	Master Protein	GRMZM2G126038_P01 pep:known chromosome:AGPv3:1:268235564:268239476:-1 gene:GRMZM2G126038 transcript:GRMZM2G126038_T01 description:"cdna	est omrna|protein"	42	24	49	4	1	744	80.7	6.38	6.197	High	0	214.8	24	22
FALSE	Master Protein	AC234522.1_FGP005	pep:known chromosome:AGPv3:5:40977812:40978519:1 gene:AC234522.1_FG005 transcript:AC234522.1_FGT005 description:"abinitio"	78	14	52	14	1	235	24.9	5.14	38.811	High	0	214.54	14	0
FALSE	Master Protein	GRMZM2G466833_P01 pep:known chromosome:AGPv3:3:213978038:213986724:1 gene:GRMZM2G466833 transcript:GRMZM2G466833_T01 description:"cdna	est omrna|protein"	40	13	45	2	1	410	43.8	9.1	13.125	High	0	214.18	13	0
FALSE	Master Protein	GRMZM2G050514_P03	pep:known chromosome:AGPv3:1:27978709:27982007:-1 gene:GRMZM2G050514 transcript:GRMZM2G050514_T03 description:"protein"	53	16	44	12	1	363	39.8	5.73	86.333	High	0	214.02	16	0
FALSE	Master Protein	GRMZM2G389768_P01 pep:known chromosome:AGPv3:4:238665158:238666872:-1 gene:GRMZM2G389768 transcript:GRMZM2G389768_T01 description:"cdna	est omrna|protein"	66	10	48	10	1	249	23.2	6.38	16.783	High	0	214	10	0
FALSE	Master Protein	GRMZM2G047310_P02 pep:known chromosome:AGPv3:3:148873492:148885561:-1 gene:GRMZM2G047310 transcript:GRMZM2G047310_T02 description:"cdna	est omrna|protein"	36	30	53	9	1	982	108.2	6.19	3.417	High	0	213.79	30	21
FALSE	Master Protein	GRMZM2G448001_P01 pep:known chromosome:AGPv3:5:1526743:1529123:-1 gene:GRMZM2G448001 transcript:GRMZM2G448001_T01 description:"cdna	est omrna|protein"	47	23	44	23	1	689	73.9	6.19	11.253	High	0	213.6	23	0
FALSE	Master Protein	GRMZM2G071087_P01 pep:known chromosome:AGPv3:5:38494017:38501637:1 gene:GRMZM2G071087 transcript:GRMZM2G071087_T01 description:"cdna	est omrna|protein"	36	13	49	12	1	565	58.8	4.58	6.017	High	0	212.86	13	1
FALSE	Master Protein	GRMZM2G055507_P01 pep:known chromosome:AGPv3:4:187464667:187470685:1 gene:GRMZM2G055507 transcript:GRMZM2G055507_T01 description:"cdna	est omrna|protein"	60	26	48	8	1	641	68.7	7.03	9.578	High	0	212.11	26	0
FALSE	Master Protein	GRMZM2G123234_P01 pep:known chromosome:AGPv3:4:53991137:53993675:-1 gene:GRMZM2G123234 transcript:GRMZM2G123234_T01 description:"cdna	est omrna|protein"	53	10	48	8	1	286	31.2	4.75	7.913	High	0	212	10	2
FALSE	Master Protein	GRMZM2G120652_P01 pep:known chromosome:AGPv3:7:1287636:1289355:1 gene:GRMZM2G120652 transcript:GRMZM2G120652_T01 description:"cdna	est omrna|protein"	26	11	57	2	1	413	44	9.39	11.115	High	0	211.88	11	12
FALSE	Master Protein	GRMZM5G817886_P02	pep:known chromosome:AGPv3:2:10216755:10222011:-1 gene:GRMZM5G817886 transcript:GRMZM5G817886_T02 description:"est|mrna"	48	16	45	12	1	510	55.7	7.2	5.723	High	0	211.86	16	4
FALSE	Master Protein	GRMZM2G077214_P01 pep:known chromosome:AGPv3:1:255046014:255052714:-1 gene:GRMZM2G077214 transcript:GRMZM2G077214_T01 description:"cdna	est omrna|protein"	44	15	47	15	1	404	45.5	8.41	10.007	High	0	211.33	15	0
FALSE	Master Protein	GRMZM2G027282_P03	pep:known chromosome:AGPv3:5:214382341:214386491:-1 gene:GRMZM2G027282 transcript:GRMZM2G027282_T03 description:"omrna|protein"	63	28	50	6	1	449	49.8	5.08	36.751	High	0	211.31	28	24
FALSE	Master Protein	GRMZM2G180988_P02 pep:known chromosome:AGPv3:8:157629081:157639477:-1 gene:GRMZM2G180988 transcript:GRMZM2G180988_T02 description:"cdna	omrna protein"	38	30	52	11	1	982	107.9	6.07	3.273	High	0	211.01	30	0
FALSE	Master Protein	GRMZM2G016189_P02	pep:known chromosome:AGPv3:1:216101470:216107848:-1 gene:GRMZM2G016189 transcript:GRMZM2G016189_T01 description:"cdna"	51	17	42	8	1	506	55	5.33	11.023	High	0	209.96	17	9
FALSE	Master Protein	GRMZM2G082185_P01 pep:known chromosome:AGPv3:8:6465005:6468479:1 gene:GRMZM2G082185 transcript:GRMZM2G082185_T01 description:"abinitio	cdna est|omrna"	56	15	48	3	1	398	41.6	7.39	18.573	High	0	209.77	15	13
FALSE	Master Protein	GRMZM2G029186_P04 pep:novel chromosome:AGPv3:5:204142968:204153700:-1 gene:GRMZM2G029186 transcript:GRMZM2G029186_T04 description:"cdna	est omrna|protein"	31	37	53	29	1	1375	149.9	5.96	3.693	High	0	209.73	37	8
FALSE	Master Protein	GRMZM2G109165_P01	pep:known chromosome:AGPv3:5:76974553:76976307:-1 gene:GRMZM2G109165 transcript:GRMZM2G109165_T01 description:"omrna|protein"	61	13	52	13	1	262	27.9	10.59	28.552	High	0	209.62	13	0
FALSE	Master Protein	GRMZM2G019121_P01 pep:known chromosome:AGPv3:5:75965462:75969666:-1 gene:GRMZM2G019121 transcript:GRMZM2G019121_T01 description:"cdna	est omrna|protein"	48	24	53	10	1	546	60.8	6.4	7.297	High	0	209.15	24	16
FALSE	Master Protein	GRMZM2G446253_P01 pep:novel chromosome:AGPv3:6:68391721:68395572:-1 gene:GRMZM2G446253 transcript:GRMZM2G446253_T01 description:"abinitio	cdna est|protein"	28	16	47	4	1	425	46.5	6.95	9.89	High	0	208.84	16	0
FALSE	Master Protein	GRMZM2G379758_P01 pep:known chromosome:AGPv3:2:7095602:7102600:-1 gene:GRMZM2G379758 transcript:GRMZM2G379758_T01 description:"abinitio	cdna est|omrna|protein"	31	31	51	2	1	930	106	5.55	5.629	High	0	208.13	31	30
FALSE	Master Protein	GRMZM2G164352_P01 pep:known chromosome:AGPv3:6:64676766:64683561:1 gene:GRMZM2G164352 transcript:GRMZM2G164352_T01 description:"cdna	est omrna|protein"	49	22	50	12	1	587	65.6	5.07	9	High	0	208.02	22	10
FALSE	Master Protein	GRMZM2G076544_P01 pep:known chromosome:AGPv3:8:134672877:134675264:-1 gene:GRMZM2G076544 transcript:GRMZM2G076544_T01 description:"cdna	est protein"	60	13	47	3	1	248	26.2	9.19	63.938	High	0	207.95	13	0
FALSE	Master Protein	GRMZM2G073814_P02 pep:known chromosome:AGPv3:1:210510121:210514559:1 gene:GRMZM2G073814 transcript:GRMZM2G073814_T02 description:"cdna	est omrna|protein"	41	20	45	17	1	624	65.2	7.02	7.254	High	0	207.81	20	2
FALSE	Master Protein	GRMZM2G096391_P01 pep:known chromosome:AGPv3:3:168333666:168342224:1 gene:GRMZM2G096391 transcript:GRMZM2G096391_T01 description:"cdna	est omrna|protein"	36	19	47	19	1	612	64.6	5.05	9.857	High	0	207.25	19	0
FALSE	Master Protein	GRMZM2G032505_P03	pep:known chromosome:AGPv3:6:122980592:123021138:1 gene:GRMZM2G032505 transcript:GRMZM2G032505_T03 description:"est"	62	26	49	4	1	430	47.8	5.07	30.623	High	0	207.1	26	0
FALSE	Master Protein	GRMZM5G856084_P01	pep:novel chromosome:AGPv3:10:82059765:82064097:-1 gene:GRMZM5G856084 transcript:GRMZM5G856084_T01 description:"est"	46	22	48	7	1	448	48.1	9.45	13.874	High	0	206.75	22	16
FALSE	Master Protein	GRMZM5G804323_P01	pep:known chromosome:AGPv3:2:204830310:204831718:1 gene:GRMZM5G804323 transcript:GRMZM5G804323_T01 description:"est"	49	12	52	1	1	216	23	9.8	30.623	High	0	206.63	12	0
FALSE	Master Protein	GRMZM2G145595_P01 pep:known chromosome:AGPv3:8:42288231:42296592:-1 gene:GRMZM2G145595 transcript:GRMZM2G145595_T01 description:"cdna	est omrna|protein"	47	20	47	10	1	562	59.7	7.24	9.826	High	0	206.56	20	0
FALSE	Master Protein	GRMZM2G073774_P01 pep:known chromosome:AGPv3:8:78818791:78826096:1 gene:GRMZM2G073774 transcript:GRMZM2G073774_T01 description:"cdna	est protein"	41	20	48	10	1	565	59.3	7.06	8.284	High	0	206.27	20	10
FALSE	Master Protein	GRMZM2G113093_P01 pep:known chromosome:AGPv3:10:5741708:5749233:-1 gene:GRMZM2G113093 transcript:GRMZM2G113093_T01 description:"cdna	est omrna|protein"	42	25	53	19	1	556	61.1	9.8	6.988	High	0	206.13	25	6
FALSE	Master Protein	GRMZM2G084181_P01 pep:known chromosome:AGPv3:2:9118396:9130485:1 gene:GRMZM2G084181 transcript:GRMZM2G084181_T01 description:"est	omrna protein"	25	37	55	35	1	1627	183	6.93	2.246	High	0	205.86	37	2
FALSE	Master Protein	GRMZM2G313678_P01 pep:known chromosome:AGPv3:5:1033436:1038047:1 gene:GRMZM2G313678 transcript:GRMZM2G313678_T01 description:"cdna	est omrna|protein"	54	20	48	4	1	450	48.4	6.55	9.771	High	0	205.8	20	0
FALSE	Master Protein	GRMZM2G040968_P01 pep:known chromosome:AGPv3:10:20391694:20418386:1 gene:GRMZM2G040968 transcript:GRMZM2G040968_T01 description:"cdna	omrna protein"	54	27	50	27	1	690	74.3	5.22	10.288	High	0	205.77	27	0
FALSE	Master Protein	GRMZM2G300801_P01 pep:known chromosome:AGPv3:1:12138275:12140019:1 gene:GRMZM2G300801 transcript:GRMZM2G300801_T01 description:"cdna	est omrna|protein"	44	17	44	17	1	425	44.8	8.31	13.251	High	0	205.25	17	0
FALSE	Master Protein	GRMZM2G106424_P01 pep:known chromosome:AGPv3:4:209972408:209975654:1 gene:GRMZM2G106424 transcript:GRMZM2G106424_T01 description:"cdna	est omrna|protein"	69	18	48	3	1	268	29.5	4.87	28.936	High	0	204.99	18	0
FALSE	Master Protein	GRMZM2G381744_P01 pep:known chromosome:AGPv3:4:201720787:201725575:-1 gene:GRMZM2G381744 transcript:GRMZM2G381744_T01 description:"cdna	est omrna|protein"	51	22	45	7	1	548	58.9	5.43	5.615	High	0	204.09	22	15
FALSE	Master Protein	GRMZM2G081886_P01	pep:known chromosome:AGPv3:2:5069598:5072692:-1 gene:GRMZM2G081886 transcript:GRMZM2G081886_T01 description:"est|omrna"	39	20	47	4	1	626	64.8	7.21	7.733	High	0	204	20	18
FALSE	Master Protein	GRMZM2G703490_P01	pep:novel chromosome:AGPv3:1:11398464:11401324:-1 gene:GRMZM2G703490 transcript:GRMZM2G703490_T01 description:"est"	55	24	48	1	1	453	50.6	5.58	17.588	High	0	203.92	24	0
FALSE	Master Protein	GRMZM2G090542_P01 pep:known chromosome:AGPv3:1:217073963:217111687:1 gene:GRMZM2G090542 transcript:GRMZM2G090542_T01 description:"cdna	est omrna"	42	33	53	33	1	876	98.3	5.1	4.179	High	0	203.58	33	0
FALSE	Master Protein	GRMZM2G088064_P03 pep:known chromosome:AGPv3:5:37251427:37256273:-1 gene:GRMZM2G088064 transcript:GRMZM2G088064_T03 description:"est	omrna protein"	44	20	47	17	1	482	52.8	6.46	7.577	High	0	203.57	20	2
FALSE	Master Protein	GRMZM2G004382_P01 pep:known chromosome:AGPv3:3:213704747:213708471:-1 gene:GRMZM2G004382 transcript:GRMZM2G004382_T01 description:"cdna	est omrna|protein"	31	15	49	14	1	579	63	6.76	9.857	High	0	203.55	15	1
FALSE	Master Protein	GRMZM2G030628_P01	pep:known chromosome:AGPv3:4:66925030:66935727:-1 gene:GRMZM2G030628 transcript:GRMZM2G030628_T01 description:"cdna|est"	41	19	55	18	1	446	49	8.44	9	High	0	203.29	19	1
FALSE	Master Protein	GRMZM2G117507_P01	pep:known chromosome:AGPv3:6:147529642:147539893:-1 gene:GRMZM2G117507 transcript:GRMZM2G117507_T01 description:"est"	63	24	47	5	1	445	49.9	5.76	30.623	High	0	202.72	24	20
FALSE	Master Protein	GRMZM2G079348_P02 pep:known chromosome:AGPv3:4:240652035:240655551:1 gene:GRMZM2G079348 transcript:GRMZM2G079348_T02 description:"abinitio	cdna est|protein"	35	21	49	17	1	704	79.4	9.2	5.078	High	0	202.72	21	4
FALSE	Master Protein	GRMZM2G157269_P01 pep:known chromosome:AGPv3:2:60902602:60907977:-1 gene:GRMZM2G157269 transcript:GRMZM2G157269_T01 description:"est	omrna protein"	37	22	50	15	1	736	81	7.01	6.943	High	0	202.71	22	7
FALSE	Master Protein	GRMZM2G043453_P01 pep:novel chromosome:AGPv3:5:3095928:3103654:-1 gene:GRMZM2G043453 transcript:GRMZM2G043453_T01 description:"cdna	est omrna|protein"	39	29	56	29	1	755	82.2	5.53	5.062	High	0	201.73	29	0
FALSE	Master Protein	GRMZM2G127361_P01 pep:known chromosome:AGPv3:1:219619961:219621901:1 gene:GRMZM2G127361 transcript:GRMZM2G127361_T01 description:"cdna	est omrna|protein"	51	15	42	15	1	386	39.8	8.35	13.251	High	0	201.14	15	0
FALSE	Master Protein	GRMZM2G063851_P01 pep:known chromosome:AGPv3:5:123666786:123673423:1 gene:GRMZM2G063851 transcript:GRMZM2G063851_T01 description:"cdna	est omrna|protein"	44	17	49	4	1	472	52.4	7.87	10.938	High	0	200.79	17	14
FALSE	Master Protein	GRMZM2G017186_P11 pep:known chromosome:AGPv3:1:276392439:276395192:1 gene:GRMZM2G017186 transcript:GRMZM2G017186_T11 description:"est	omrna protein"	33	18	42	10	1	682	73.9	6.89	7.058	High	0	200.5	18	5
FALSE	Master Protein	GRMZM2G114182_P01	pep:novel chromosome:AGPv3:10:141754578:141761451:1 gene:GRMZM2G114182 transcript:GRMZM2G114182_T01 description:"est"	19	28	48	28	1	1325	150.4	4.7	1.437	High	0	200.4	28	0
FALSE	Master Protein	GRMZM2G074158_P01 pep:known chromosome:AGPv3:1:278250612:278259617:-1 gene:GRMZM2G074158 transcript:GRMZM2G074158_T01 description:"cdna	est omrna|protein"	35	27	49	27	1	984	109.6	5.55	3.112	High	0	200.24	27	0
FALSE	Master Protein	GRMZM2G053322_P01 pep:known chromosome:AGPv3:8:90474300:90477778:-1 gene:GRMZM2G053322 transcript:GRMZM2G053322_T01 description:"cdna	est omrna|protein"	49	21	44	21	1	472	52.4	8.15	11.589	High	0	200.14	21	0
FALSE	Master Protein	GRMZM2G108474_P01 pep:known chromosome:AGPv3:5:68048817:68051710:-1 gene:GRMZM2G108474 transcript:GRMZM2G108474_T01 description:"cdna	est protein"	92	14	50	14	1	167	18.7	4.67	283.804	High	0	200	14	0
FALSE	Master Protein	GRMZM2G463640_P01 pep:known chromosome:AGPv3:5:21522922:21524744:-1 gene:GRMZM2G463640 transcript:GRMZM2G463640_T01 description:"est	omrna protein"	27	5	45	5	1	232	25.9	8.97	11.589	High	0	199.81	5	0
FALSE	Master Protein	GRMZM2G105571_P02 pep:known chromosome:AGPv3:1:5867093:5870869:1 gene:GRMZM2G105571 transcript:GRMZM2G105571_T02 description:"est	omrna protein"	31	13	53	8	1	380	41.2	9.8	11.115	High	0	199.75	13	0
FALSE	Master Protein	GRMZM2G328094_P01 pep:known chromosome:AGPv3:8:6457162:6458737:1 gene:GRMZM2G328094 transcript:GRMZM2G328094_T01 description:"cdna	est omrna|protein"	60	20	45	19	1	358	38.9	6.54	25.827	High	0	199.67	20	1
FALSE	Master Protein	GRMZM2G175423_P01 pep:known chromosome:AGPv3:1:197301249:197304338:1 gene:GRMZM2G175423 transcript:GRMZM2G175423_T01 description:"cdna	est omrna|protein"	65	16	47	16	1	366	39	6.73	22.101	High	0	199.57	16	0
FALSE	Master Protein	GRMZM2G159744_P02 pep:known chromosome:AGPv3:6:104663079:104676855:-1 gene:GRMZM2G159744 transcript:GRMZM2G159744_T02 description:"cdna	est omrna|protein"	37	44	54	35	1	1336	150.1	6.96	2.914	High	0	199.45	44	9
FALSE	Master Protein	GRMZM2G006791_P01 pep:known chromosome:AGPv3:5:172434779:172439962:-1 gene:GRMZM2G006791 transcript:GRMZM2G006791_T01 description:"cdna	est omrna"	51	20	46	17	1	462	50.3	5.72	14.317	High	0	198.47	20	3
FALSE	Master Protein	GRMZM2G078143_P01	pep:known chromosome:AGPv3:4:20795669:20799891:-1 gene:GRMZM2G078143 transcript:GRMZM2G078143_T01 description:"est"	39	18	42	16	1	526	57.4	8.56	10.86	High	0	197.78	18	2
FALSE	Master Protein	GRMZM2G134980_P02	pep:known chromosome:AGPv3:5:16340014:16344789:-1 gene:GRMZM2G134980 transcript:GRMZM2G134980_T02 description:"omrna|protein"	51	22	46	13	1	419	46.6	6.61	25.102	High	0	197.7	22	9
FALSE	Master Protein	GRMZM2G540403_P01	pep:known chromosome:AGPv3:1:38320998:38327847:1 gene:GRMZM2G540403 transcript:GRMZM2G540403_T01 description:"cdna|est"	44	13	48	13	1	314	33.8	8.25	28.552	High	0	197.4	13	0
FALSE	Master Protein	GRMZM2G123204_P01 pep:known chromosome:AGPv3:1:264226088:264229800:1 gene:GRMZM2G123204 transcript:GRMZM2G123204_T01 description:"cdna	est omrna|protein"	53	21	44	19	1	489	53.1	7.15	9	High	0	197.25	21	0
FALSE	Master Protein	GRMZM2G047093_P01 pep:known chromosome:AGPv3:3:218808861:218827037:1 gene:GRMZM2G047093 transcript:GRMZM2G047093_T01 description:"cdna	est omrna|protein"	43	32	44	32	1	908	103.8	6.84	3.475	High	0	197.24	32	0
FALSE	Master Protein	GRMZM2G115598_P01	pep:known chromosome:AGPv3:2:7191858:7195891:1 gene:GRMZM2G115598 transcript:GRMZM2G115598_T01 description:"est"	31	30	49	1	1	895	102.2	5.48	5.31	High	0	197.12	30	0
FALSE	Master Protein	GRMZM2G060470_P02 pep:known chromosome:AGPv3:4:185030934:185035068:1 gene:GRMZM2G060470 transcript:GRMZM2G060470_T02 description:"cdna	est omrna|protein"	46	21	47	21	1	460	50.1	6.44	10.548	High	0	196.75	21	0
FALSE	Master Protein	GRMZM2G365374_P01 pep:known chromosome:AGPv3:2:190808304:190811362:-1 gene:GRMZM2G365374 transcript:GRMZM2G365374_T01 description:"cdna	est omrna|protein"	32	23	49	18	1	681	72.7	5.77	4.337	High	0	196.66	23	0
FALSE	Master Protein	GRMZM2G087326_P01 pep:known chromosome:AGPv3:5:18789191:18791839:1 gene:GRMZM2G087326 transcript:GRMZM2G087326_T01 description:"cdna	est omrna|protein"	62	18	50	2	1	364	41.2	6.55	20.544	High	0	196.4	18	19
FALSE	Master Protein	GRMZM2G006130_P04	pep:known chromosome:AGPv3:3:230094702:230105466:-1 gene:GRMZM2G006130 transcript:GRMZM2G006130_T04 description:"omrna"	39	17	44	17	1	658	72.4	5.27	12.895	High	0	196.25	17	0
FALSE	Master Protein	GRMZM2G126010_P02	pep:known chromosome:AGPv3:8:99906105:99909909:-1 gene:GRMZM2G126010 transcript:GRMZM2G126010_T02 description:"est|protein"	42	15	52	4	1	376	41.6	5.39	13.678	High	0	196.2	15	0
FALSE	Master Protein	GRMZM2G141587_P03	pep:known chromosome:AGPv3:4:231742733:231752595:1 gene:GRMZM2G141587 transcript:GRMZM2G141587_T03 description:"est"	35	29	47	5	1	923	103.9	4.98	5.144	High	0	196.14	29	26
FALSE	Master Protein	GRMZM2G092663_P01 pep:known chromosome:AGPv3:1:290625947:290627932:1 gene:GRMZM2G092663 transcript:GRMZM2G092663_T01 description:"cdna	est omrna|protein"	54	13	49	3	1	274	29.9	10.15	17.33	High	0	196.12	13	0
FALSE	Master Protein	GRMZM2G091560_P01 pep:known chromosome:AGPv3:4:191052633:191057158:-1 gene:GRMZM2G091560 transcript:GRMZM2G091560_T01 description:"cdna	est omrna|protein"	50	23	46	23	1	546	60.3	6.57	7.377	High	0	195.83	23	0
FALSE	Master Protein	GRMZM2G361693_P01 pep:known chromosome:AGPv3:4:182908776:182913540:1 gene:GRMZM2G361693 transcript:GRMZM2G361693_T01 description:"cdna	est omrna|protein"	63	23	45	3	1	390	42.7	8.19	33.807	High	0	195.09	23	0
FALSE	Master Protein	GRMZM2G018441_P01 pep:known chromosome:AGPv3:10:127280412:127282813:1 gene:GRMZM2G018441 transcript:GRMZM2G018441_T01 description:"cdna	est omrna|protein"	50	16	42	16	1	366	39.3	5.64	34.938	High	0	195.01	16	0
FALSE	Master Protein	GRMZM2G134917_P01 pep:known chromosome:AGPv3:1:285992073:285995271:1 gene:GRMZM2G134917 transcript:GRMZM2G134917_T01 description:"cdna	est omrna|protein"	40	17	46	3	1	418	46.6	6.19	17.233	High	0	194.97	17	0
FALSE	Master Protein	GRMZM2G178618_P01 pep:known chromosome:AGPv3:7:16344540:16352217:1 gene:GRMZM2G178618 transcript:GRMZM2G178618_T01 description:"cdna	est omrna|protein"	44	30	48	3	1	888	98.6	5.11	5.051	High	0	194.9	30	0
FALSE	Master Protein	GRMZM5G825090_P03	pep:known chromosome:AGPv3:1:205054198:205057301:-1 gene:GRMZM5G825090 transcript:GRMZM5G825090_T03 description:"est"	41	10	38	3	1	347	37.6	8.29	7.799	High	0	194.14	10	0
FALSE	Master Protein	GRMZM2G441347_P01 pep:known chromosome:AGPv3:2:28745742:28748887:1 gene:GRMZM2G441347 transcript:GRMZM2G441347_T01 description:"cdna	est protein"	44	24	45	11	1	703	75.7	6.62	4.926	High	0	194.05	24	1
FALSE	Master Protein	GRMZM2G002416_P01	pep:novel chromosome:AGPv3:8:37415286:37418826:1 gene:GRMZM2G002416 transcript:GRMZM2G002416_T01 description:"est|mrna"	53	21	50	5	1	449	49.5	7.88	27.943	High	0	194.05	21	17
FALSE	Master Protein	GRMZM2G146589_P03	pep:known chromosome:AGPv3:1:246761738:246769103:-1 gene:GRMZM2G146589 transcript:GRMZM2G146589_T03 description:"est|protein"	45	26	52	11	1	605	68.6	6.2	9	High	0	193.79	26	18
FALSE	Master Protein	GRMZM2G144273_P01	pep:known chromosome:AGPv3:5:1333687:1341860:1 gene:GRMZM2G144273 transcript:GRMZM2G144273_T01 description:"cdna"	36	17	45	17	1	604	65	7.85	6.055	High	0	193.02	17	0
FALSE	Master Protein	GRMZM2G326111_P01 pep:known chromosome:AGPv3:5:167791848:167793057:1 gene:GRMZM2G326111 transcript:GRMZM2G326111_T01 description:"cdna	est omrna|protein"	51	8	47	3	1	172	18.4	8.69	99	High	0	192.93	8	5
FALSE	Master Protein	GRMZM2G140545_P01 pep:known chromosome:AGPv3:4:197081353:197082721:1 gene:GRMZM2G140545 transcript:GRMZM2G140545_T01 description:"cdna	est omrna|protein"	63	16	47	9	1	259	28.6	4.94	34.481	High	0	192.9	16	0
FALSE	Master Protein	GRMZM2G153823_P01 pep:known chromosome:AGPv3:1:196277684:196281261:1 gene:GRMZM2G153823 transcript:GRMZM2G153823_T01 description:"cdna	est omrna|protein"	52	15	48	5	1	257	29	4.87	25.367	High	0	192.79	15	0
FALSE	Master Protein	GRMZM2G106974_P01 pep:known chromosome:AGPv3:10:74860604:74866745:1 gene:GRMZM2G106974 transcript:GRMZM2G106974_T01 description:"abinitio	cdna est|omrna|protein"	39	28	44	5	1	815	92.7	5.41	4.69	High	0	192.73	28	0
FALSE	Master Protein	GRMZM2G073725_P01 pep:known chromosome:AGPv3:1:248922560:248925400:-1 gene:GRMZM2G073725 transcript:GRMZM2G073725_T01 description:"cdna	est omrna|protein"	56	17	49	1	1	364	41.2	6.13	18.573	High	0	192.66	17	0
FALSE	Master Protein	GRMZM2G328893_P01 pep:known chromosome:AGPv3:3:33565965:33571557:-1 gene:GRMZM2G328893 transcript:GRMZM2G328893_T01 description:"cdna	est omrna|protein"	65	14	46	2	1	305	32.2	5.8	34.481	High	0	192.64	14	0
FALSE	Master Protein	GRMZM2G181258_P01 pep:known chromosome:AGPv3:10:16218811:16219788:-1 gene:GRMZM2G181258 transcript:GRMZM2G181258_T01 description:"cdna	est omrna|protein"	45	9	49	2	1	174	18.6	8.29	23.245	High	0	192.22	9	8
FALSE	Master Protein	GRMZM5G828229_P02	pep:known chromosome:AGPv3:10:82052086:82056877:1 gene:GRMZM5G828229 transcript:GRMZM5G828229_T02 description:"est"	48	20	49	20	1	499	53.7	8.47	10.498	High	0	192.16	20	0
FALSE	Master Protein	GRMZM2G091811_P01 pep:known chromosome:AGPv3:4:34585189:34589925:-1 gene:GRMZM2G091811 transcript:GRMZM2G091811_T01 description:"cdna	est omrna|protein"	48	22	45	7	1	448	48	9.35	10.721	High	0	191.22	22	0
FALSE	Master Protein	GRMZM2G028218_P01 pep:known chromosome:AGPv3:5:4684604:4688508:-1 gene:GRMZM2G028218 transcript:GRMZM2G028218_T01 description:"cdna	est protein"	41	18	46	3	1	417	46.5	6.05	17.233	High	0	190.62	18	10
FALSE	Master Protein	EF517601.1_FGP012	pep:known chromosome:AGPv3:3:34547618:34559245:1 gene:EF517601.1_FG012 transcript:EF517601.1_FGT012 description:"abinitio"	32	23	44	7	1	787	86.8	5.99	4.696	High	0	190.49	23	17
FALSE	Master Protein	GRMZM2G009871_P01 pep:known chromosome:AGPv3:4:237585169:237590369:-1 gene:GRMZM2G009871 transcript:GRMZM2G009871_T01 description:"cdna	est omrna|protein"	56	28	47	28	1	560	60.3	7.39	9	High	0	190.42	28	0
FALSE	Master Protein	GRMZM2G360021_P01 pep:known chromosome:AGPv3:3:211808805:211809914:-1 gene:GRMZM2G360021 transcript:GRMZM2G360021_T01 description:"cdna	est omrna|protein"	62	11	43	5	1	183	18.8	5.96	122.285	High	0	189.88	11	6
FALSE	Master Protein	GRMZM2G146115_P01 pep:known chromosome:AGPv3:10:61805736:61813778:-1 gene:GRMZM2G146115 transcript:GRMZM2G146115_T01 description:"cdna	est omrna|protein"	59	20	46	20	1	393	44.2	6.76	10.938	High	0	189.54	20	0
FALSE	Master Protein	GRMZM2G063909_P01	pep:known chromosome:AGPv3:4:234339416:234350470:1 gene:GRMZM2G063909 transcript:GRMZM2G063909_T01 description:"est"	55	13	48	9	1	279	31.3	6.95	99	High	0	189.09	13	0
FALSE	Master Protein	GRMZM2G319109_P01 pep:novel chromosome:AGPv3:6:143854557:143881570:1 gene:GRMZM2G319109 transcript:GRMZM2G319109_T01 description:"est	omrna protein"	46	28	44	28	1	794	87	5.06	4.69	High	0	189.04	28	0
FALSE	Master Protein	GRMZM2G375504_P01	pep:known chromosome:AGPv3:8:95226658:95237335:1 gene:GRMZM2G375504 transcript:GRMZM2G375504_T01 description:"cdna|est"	39	25	46	20	1	717	77.7	6.55	4.9	High	0	189.01	25	5
FALSE	Master Protein	GRMZM2G405584_P01	pep:known chromosome:AGPv3:10:90154155:90158007:-1 gene:GRMZM2G405584 transcript:GRMZM2G405584_T01 description:"est|protein"	18	15	49	15	1	738	83	8.95	6.279	High	0	189	15	0
FALSE	Master Protein	GRMZM2G032049_P01 pep:known chromosome:AGPv3:8:21821792:21828125:1 gene:GRMZM2G032049 transcript:GRMZM2G032049_T01 description:"cdna	est omrna|protein"	47	33	49	10	1	796	90	6.67	5.661	High	0	188.55	33	24
FALSE	Master Protein	GRMZM2G104608_P02	pep:known chromosome:AGPv3:7:143224633:143231160:1 gene:GRMZM2G104608 transcript:GRMZM2G104608_T02 description:"protein"	35	22	42	22	1	706	78.7	7.93	4.012	High	0	187.27	22	0
FALSE	Master Protein	GRMZM2G023418_P01 pep:known chromosome:AGPv3:8:77591282:77597730:1 gene:GRMZM2G023418 transcript:GRMZM2G023418_T01 description:"cdna	est omrna|protein"	30	33	42	33	1	1293	143.5	5.22	3.475	High	0	187.19	33	0
FALSE	Master Protein	GRMZM2G077851_P01 pep:known chromosome:AGPv3:1:151365764:151367902:1 gene:GRMZM2G077851 transcript:GRMZM2G077851_T01 description:"cdna	est omrna|protein"	64	17	44	1	1	261	28.2	11.08	30.623	High	0	187.04	17	17
FALSE	Master Protein	GRMZM2G361605_P02	pep:novel chromosome:AGPv3:6:131147984:131160298:-1 gene:GRMZM2G361605 transcript:GRMZM2G361605_T02 description:"est"	20	27	49	3	1	1186	130.2	8.25	2.531	High	0	187.02	27	0
FALSE	Master Protein	GRMZM2G083836_P03	pep:known chromosome:AGPv3:8:48512358:48518218:-1 gene:GRMZM2G083836 transcript:GRMZM2G083836_T03 description:"cdna"	37	20	43	19	1	565	63.1	6.44	5.739	High	0	186.69	20	1
FALSE	Master Protein	GRMZM2G076885_P01 pep:known chromosome:AGPv3:5:6451817:6459254:-1 gene:GRMZM2G076885 transcript:GRMZM2G076885_T01 description:"cdna	est omrna|protein"	62	16	41	16	1	377	40.8	7.43	15.876	High	0	186.68	16	0
FALSE	Master Protein	GRMZM2G018607_P01 pep:known chromosome:AGPv3:2:234098536:234101050:-1 gene:GRMZM2G018607 transcript:GRMZM2G018607_T01 description:"est	omrna protein"	42	22	41	8	1	709	77.6	6.32	4.623	High	0	186.21	22	1
FALSE	Master Protein	GRMZM2G025855_P01 pep:known chromosome:AGPv3:1:222599895:222603595:-1 gene:GRMZM2G025855 transcript:GRMZM2G025855_T01 description:"abinitio	cdna est|omrna"	43	15	48	15	1	320	34.4	5.29	30.623	High	0	186.2	15	0
FALSE	Master Protein	GRMZM2G148709_P01 pep:known chromosome:AGPv3:6:124919145:124927554:-1 gene:GRMZM2G148709 transcript:GRMZM2G148709_T01 description:"est	omrna protein"	51	27	44	17	1	654	73.3	7.43	5.062	High	0	186.05	27	10
FALSE	Master Protein	GRMZM5G877454_P01	pep:known chromosome:AGPv3:Pt:21468:24695:1 gene:GRMZM5G877454 transcript:GRMZM5G877454_T01 description:"oprotein|protein"	31	29	45	29	1	1075	121.5	8.97	2.952	High	0	185.63	29	0
FALSE	Master Protein	GRMZM2G080107_P01	pep:known chromosome:AGPv3:3:138460913:138462021:1 gene:GRMZM2G080107 transcript:GRMZM2G080107_T01 description:"est"	48	8	38	2	1	145	15.5	9.07	73.989	High	0	185.59	8	6
FALSE	Master Protein	GRMZM2G063700_P02 pep:known chromosome:AGPv3:4:232945222:232947736:-1 gene:GRMZM2G063700 transcript:GRMZM2G063700_T02 description:"cdna	est omrna|protein"	47	10	40	7	1	221	25	10.37	30.623	High	0	185.12	10	3
FALSE	Master Protein	GRMZM2G122563_P01 pep:novel chromosome:AGPv3:6:124095619:124096342:1 gene:GRMZM2G122563 transcript:GRMZM2G122563_T01 description:"abinitio	est omrna|protein"	32	3	47	1	1	180	19.9	4.73	13.678	High	0	184.58	3	0
FALSE	Master Protein	GRMZM2G454952_P01 pep:known chromosome:AGPv3:7:17481578:17490013:1 gene:GRMZM2G454952 transcript:GRMZM2G454952_T01 description:"cdna	est omrna"	49	27	49	27	1	572	63.1	7.87	12.01	High	0	184.53	27	0
FALSE	Master Protein	GRMZM2G015361_P05	pep:known chromosome:AGPv3:8:4233106:4236815:1 gene:GRMZM2G015361 transcript:GRMZM2G015361_T05 description:"omrna"	30	9	42	1	1	278	31.9	7.17	15.681	High	0	184.34	9	11
FALSE	Master Protein	GRMZM2G358009_P01 pep:known chromosome:AGPv3:3:138151050:138152140:-1 gene:GRMZM2G358009 transcript:GRMZM2G358009_T01 description:"cdna	est omrna|protein"	69	8	47	1	1	94	10.1	6.49	680.292	High	0	183.53	8	0
FALSE	Master Protein	GRMZM2G064799_P01 pep:known chromosome:AGPv3:7:4239369:4244199:1 gene:GRMZM2G064799 transcript:GRMZM2G064799_T01 description:"cdna	est omrna|protein"	50	21	41	2	1	619	67.9	6.46	5.391	High	0	183.2	21	0
FALSE	Master Protein	GRMZM2G071071_P01 pep:known chromosome:AGPv3:5:3196192:3207509:1 gene:GRMZM2G071071 transcript:GRMZM2G071071_T01 description:"cdna	est omrna|protein"	52	25	40	6	1	647	71.8	5.62	9	High	0	183.19	25	20
FALSE	Master Protein	GRMZM5G883741_P02	pep:known chromosome:AGPv3:5:193227012:193258073:1 gene:GRMZM5G883741 transcript:GRMZM5G883741_T02 description:"cdna|est"	48	28	48	28	1	581	65.7	6.34	8.441	High	0	182.99	28	0
FALSE	Master Protein	GRMZM2G092327_P01 pep:known chromosome:AGPv3:2:232669592:232674854:1 gene:GRMZM2G092327 transcript:GRMZM2G092327_T01 description:"cdna	est omrna|protein"	38	24	48	19	1	647	68.3	8.37	5.615	High	0	182.82	24	6
FALSE	Master Protein	GRMZM2G370852_P02	pep:known chromosome:AGPv3:5:72949363:72953503:-1 gene:GRMZM2G370852 transcript:GRMZM2G370852_T02 description:"est"	43	17	45	8	1	505	54.6	6.95	9.771	High	0	182.54	17	10
FALSE	Master Protein	GRMZM2G117968_P01 pep:known chromosome:AGPv3:2:206372638:206378204:1 gene:GRMZM2G117968 transcript:GRMZM2G117968_T01 description:"cdna	est omrna|protein"	35	14	45	14	1	439	47.3	6.57	11.217	High	0	182.33	14	0
FALSE	Master Protein	GRMZM2G010406_P01 pep:known chromosome:AGPv3:10:38530684:38542590:1 gene:GRMZM2G010406 transcript:GRMZM2G010406_T01 description:"cdna	est omrna|protein"	39	18	46	18	1	481	52.5	7.66	5.813	High	0	182.14	18	0
FALSE	Master Protein	GRMZM2G019695_P01 pep:known chromosome:AGPv3:5:816728:819972:-1 gene:GRMZM2G019695 transcript:GRMZM2G019695_T01 description:"cdna	est omrna|protein"	83	17	43	17	1	223	23.9	9.1	41.17	High	0	182.08	17	0
FALSE	Master Protein	GRMZM2G091563_P01 pep:known chromosome:AGPv3:1:25625963:25630911:-1 gene:GRMZM2G091563 transcript:GRMZM2G091563_T01 description:"cdna	est omrna|protein"	52	22	45	7	1	530	58.3	6.38	9.746	High	0	181.81	22	1
FALSE	Master Protein	GRMZM2G036034_P01 pep:known chromosome:AGPv3:2:232771144:232779291:-1 gene:GRMZM2G036034 transcript:GRMZM2G036034_T01 description:"cdna	est omrna|protein"	43	31	46	4	1	888	98.6	5.08	4.803	High	0	181.77	31	29
FALSE	Master Protein	GRMZM2G053236_P01	pep:known chromosome:AGPv3:5:188151059:188152501:1 gene:GRMZM2G053236 transcript:GRMZM2G053236_T01 description:"est"	38	8	36	3	1	302	32.3	7.15	7.483	High	0	181.73	8	7
FALSE	Master Protein	GRMZM2G070422_P01 pep:known chromosome:AGPv3:4:54150048:54155006:-1 gene:GRMZM2G070422 transcript:GRMZM2G070422_T01 description:"cdna	est omrna|protein"	44	12	39	9	1	369	39	7.75	16.783	High	0	181.58	12	3
FALSE	Master Protein	GRMZM2G058261_P01 pep:known chromosome:AGPv3:1:285139941:285142972:1 gene:GRMZM2G058261 transcript:GRMZM2G058261_T01 description:"cdna	est omrna|protein"	53	19	44	19	1	377	40	7.5	15.156	High	0	181.56	19	0
FALSE	Master Protein	GRMZM5G862107_P01	pep:known chromosome:AGPv3:9:134139948:134144418:-1 gene:GRMZM5G862107 transcript:GRMZM5G862107_T01 description:"est|mrna"	33	13	50	13	1	401	43.5	4.78	9	High	0	181.53	13	0
FALSE	Master Protein	GRMZM2G083095_P01 pep:known chromosome:AGPv3:2:227116528:227121373:1 gene:GRMZM2G083095 transcript:GRMZM2G083095_T01 description:"cdna	est omrna|protein"	40	18	39	3	1	548	58.9	5.43	3.924	High	0	181.52	18	0
FALSE	Master Protein	GRMZM2G141473_P01 pep:known chromosome:AGPv3:1:286577038:286584000:-1 gene:GRMZM2G141473 transcript:GRMZM2G141473_T01 description:"cdna	est omrna|protein"	28	30	44	20	1	1357	146.3	6.15	2.311	High	0	181.47	30	10
FALSE	Master Protein	GRMZM5G850015_P01	pep:known chromosome:AGPv3:2:236197693:236199063:1 gene:GRMZM5G850015 transcript:GRMZM5G850015_T01 description:"est"	32	10	47	1	1	317	33.5	7.09	10.22	High	0	181.44	10	0
FALSE	Master Protein	GRMZM2G098577_P01 pep:known chromosome:AGPv3:10:128128258:128134207:-1 gene:GRMZM2G098577 transcript:GRMZM2G098577_T01 description:"est	omrna protein"	42	30	48	15	1	785	86.6	7.88	4.937	High	0	181.34	30	0
FALSE	Master Protein	GRMZM2G096972_P01 pep:known chromosome:AGPv3:5:77128765:77133951:1 gene:GRMZM2G096972 transcript:GRMZM2G096972_T01 description:"cdna	est omrna|protein"	30	30	43	30	1	1229	135.8	5.53	2.746	High	0	180.88	30	0
FALSE	Master Protein	GRMZM5G854138_P02	pep:known chromosome:AGPv3:2:139700113:139701207:1 gene:GRMZM5G854138 transcript:GRMZM5G854138_T02 description:"est"	56	7	35	7	1	131	14.9	6.65	36.276	High	0	180.77	7	0
FALSE	Master Protein	GRMZM2G005973_P01 pep:known chromosome:AGPv3:6:143320298:143325895:1 gene:GRMZM2G005973 transcript:GRMZM2G005973_T01 description:"abinitio	cdna est|omrna"	48	17	46	17	1	345	37.2	8.66	21.909	High	0	180.29	17	0
FALSE	Master Protein	GRMZM2G014788_P01 pep:known chromosome:AGPv3:8:37227436:37246355:1 gene:GRMZM2G014788 transcript:GRMZM2G014788_T01 description:"cdna	est omrna|protein"	31	33	45	33	1	1193	130.8	5.88	2.899	High	0	180.24	33	0
FALSE	Master Protein	GRMZM2G085000_P03	pep:known chromosome:AGPv3:4:52041851:52045169:-1 gene:GRMZM2G085000 transcript:GRMZM2G085000_T03 description:"est|omrna"	41	11	36	5	1	350	38.6	9.31	4.78	High	0	179.91	11	8
FALSE	Master Protein	GRMZM5G863656_P01	pep:novel chromosome:AGPv3:1:22936909:22937586:-1 gene:GRMZM5G863656 transcript:GRMZM5G863656_T01 description:"est"	73	4	43	1	1	64	7.2	5.1	24.119	High	0	179.9	4	0
FALSE	Master Protein	GRMZM2G072729_P01 pep:known chromosome:AGPv3:7:34234963:34237300:1 gene:GRMZM2G072729 transcript:GRMZM2G072729_T01 description:"est	omrna protein"	64	17	42	1	1	260	28.1	11.08	26.826	High	0	179.67	17	0
FALSE	Master Protein	GRMZM2G071871_P02 pep:known chromosome:AGPv3:8:27126572:27132988:-1 gene:GRMZM2G071871 transcript:GRMZM2G071871_T02 description:"cdna	est omrna|protein"	47	22	46	8	1	545	60.6	6.25	5.469	High	0	179.27	22	0
FALSE	Master Protein	GRMZM2G423555_P02	pep:known chromosome:AGPv3:7:147807813:147820191:-1 gene:GRMZM2G423555 transcript:GRMZM2G423555_T02 description:"cdna"	25	45	46	45	1	2804	299.5	4.92	0.851	High	0	179	45	0
FALSE	Master Protein	GRMZM2G022866_P02 pep:known chromosome:AGPv3:1:204911494:204914622:-1 gene:GRMZM2G022866 transcript:GRMZM2G022866_T02 description:"cdna	est omrna|protein"	35	10	37	2	1	344	37.4	8.51	6.743	High	0	178.97	10	2
FALSE	Master Protein	GRMZM2G156227_P01 pep:known chromosome:AGPv3:2:12110007:12114059:-1 gene:GRMZM2G156227 transcript:GRMZM2G156227_T01 description:"cdna	est omrna|protein"	52	18	43	17	1	351	38.3	8.38	17.233	High	0	178.71	18	1
FALSE	Master Protein	GRMZM2G039996_P02	pep:known chromosome:AGPv3:2:2020741:2022137:-1 gene:GRMZM2G039996 transcript:GRMZM2G039996_T02 description:"omrna|protein"	34	9	48	6	1	253	27.1	8.31	10.788	High	0	178.67	9	0
FALSE	Master Protein	GRMZM2G058910_P01 pep:known chromosome:AGPv3:1:34658309:34665859:1 gene:GRMZM2G058910 transcript:GRMZM2G058910_T01 description:"cdna	est omrna|protein"	33	22	44	22	1	822	92.9	6.27	4.549	High	0	178.55	22	0
FALSE	Master Protein	GRMZM2G354604_P01	pep:known chromosome:AGPv3:6:165905099:165907537:-1 gene:GRMZM2G354604 transcript:GRMZM2G354604_T01 description:"omrna"	44	11	39	2	1	228	25.9	7.11	99	High	0	178.49	11	0
FALSE	Master Protein	GRMZM2G057243_P01 pep:known chromosome:AGPv3:9:152353213:152359196:-1 gene:GRMZM2G057243 transcript:GRMZM2G057243_T01 description:"cdna	est protein"	46	18	42	18	1	550	62	6.24	5.661	High	0	178.36	18	0
FALSE	Master Protein	AC212835.3_FGP007	pep:known chromosome:AGPv3:2:21631613:21634968:1 gene:AC212835.3_FG007 transcript:AC212835.3_FGT007 description:"est"	48	22	41	18	1	474	54.4	5.76	7.66	High	0	178.15	22	4
FALSE	Master Protein	GRMZM2G086845_P01 pep:known chromosome:AGPv3:3:168566367:168569728:1 gene:GRMZM2G086845 transcript:GRMZM2G086845_T01 description:"cdna	est omrna|protein"	57	18	43	6	1	323	34.7	5	12.503	High	0	178.14	18	12
FALSE	Master Protein	GRMZM2G157462_P01 pep:known chromosome:AGPv3:6:115470624:115479568:1 gene:GRMZM2G157462 transcript:GRMZM2G157462_T01 description:"cdna	est omrna|protein"	42	37	48	19	1	913	99.6	9.14	3.753	High	0	176.16	37	18
FALSE	Master Protein	GRMZM2G004459_P01 pep:known chromosome:AGPv3:1:291863335:291871909:-1 gene:GRMZM2G004459 transcript:GRMZM2G004459_T01 description:"cdna	est protein"	48	23	38	4	1	647	71.9	5.71	7.83	High	0	176.15	23	0
FALSE	Master Protein	GRMZM2G096123_P01 pep:known chromosome:AGPv3:2:211623434:211624342:-1 gene:GRMZM2G096123 transcript:GRMZM2G096123_T01 description:"cdna	est omrna|protein"	54	10	45	3	1	145	16.1	10.68	99	High	0	175.99	10	7
FALSE	Master Protein	GRMZM2G568636_P01	pep:known chromosome:AGPv3:4:56335735:56340792:1 gene:GRMZM2G568636 transcript:GRMZM2G568636_T01 description:"est"	37	23	42	23	1	910	101.5	6.83	3.844	High	0	175.87	23	0
FALSE	Master Protein	GRMZM2G021617_P01 pep:known chromosome:AGPv3:9:57921763:57923880:1 gene:GRMZM2G021617 transcript:GRMZM2G021617_T01 description:"cdna	est omrna|protein"	49	12	44	1	1	217	23.1	9.77	30.623	High	0	175.67	12	11
FALSE	Master Protein	GRMZM2G064023_P02 pep:known chromosome:AGPv3:4:234360280:234367429:1 gene:GRMZM2G064023 transcript:GRMZM2G064023_T02 description:"est	omrna protein"	45	17	44	4	1	472	52.4	7.37	7.377	High	0	175.64	17	1
FALSE	Master Protein	GRMZM2G009048_P01 pep:known chromosome:AGPv3:10:16377558:16378557:1 gene:GRMZM2G009048 transcript:GRMZM2G009048_T01 description:"cdna	est omrna|protein"	41	7	35	1	1	145	15.6	8.88	41.17	High	0	175.51	7	0
FALSE	Master Protein	GRMZM2G150772_P02 pep:known chromosome:AGPv3:1:256131837:256144980:1 gene:GRMZM2G150772 transcript:GRMZM2G150772_T02 description:"cdna	est omrna"	26	33	44	33	1	1650	178.9	8.12	1.96	High	0	175.51	33	0
FALSE	Master Protein	GRMZM2G089713_P07	pep:known chromosome:AGPv3:9:11501904:11506749:1 gene:GRMZM2G089713 transcript:GRMZM2G089713_T07 description:"est"	31	24	43	19	1	896	102.2	6.9	3.507	High	0	175.23	24	0
FALSE	Master Protein	GRMZM2G121186_P01 pep:known chromosome:AGPv3:6:161855885:161859125:-1 gene:GRMZM2G121186 transcript:GRMZM2G121186_T01 description:"cdna	est omrna|protein"	38	15	44	6	1	372	42.8	5.33	17.738	High	0	174.82	15	11
FALSE	Master Protein	AC234528.1_FGP005	pep:known chromosome:AGPv3:1:204299081:204304179:-1 gene:AC234528.1_FG005 transcript:AC234528.1_FGT005 description:"cdna|est"	30	15	43	15	1	591	63.2	6.74	4.946	High	0	174.75	15	0
FALSE	Master Protein	GRMZM2G305211_P02	pep:novel chromosome:AGPv3:7:159951153:159960399:-1 gene:GRMZM2G305211 transcript:GRMZM2G305211_T02 description:"abinitio"	20	14	38	1	1	644	71	9.38	2.248	High	0	174.56	14	4
FALSE	Master Protein	GRMZM2G095082_P02 pep:known chromosome:AGPv3:5:141204725:141213269:1 gene:GRMZM2G095082 transcript:GRMZM2G095082_T02 description:"cdna	est omrna|protein"	24	12	42	12	1	466	48.2	5.15	21.758	High	0	174.36	12	0
FALSE	Master Protein	GRMZM2G012863_P01	pep:novel chromosome:AGPv3:9:11221871:11225765:1 gene:GRMZM2G012863 transcript:GRMZM2G012863_T01 description:"est"	46	13	39	4	1	481	51.2	6.73	14.505	High	0	174.31	13	0
FALSE	Master Protein	GRMZM2G095865_P02 pep:known chromosome:AGPv3:5:3038892:3054684:1 gene:GRMZM2G095865 transcript:GRMZM2G095865_T02 description:"cdna	est protein"	36	29	45	29	1	933	102.1	8.79	3.01	High	0	174.17	29	0
FALSE	Master Protein	GRMZM2G085854_P01 pep:known chromosome:AGPv3:4:3270661:3272696:-1 gene:GRMZM2G085854 transcript:GRMZM2G085854_T01 description:"cdna	est omrna|protein"	55	21	42	20	1	491	52.3	5.76	7.697	High	0	173.85	21	2
FALSE	Master Protein	GRMZM2G047274_P01 pep:known chromosome:AGPv3:3:188387408:188390357:-1 gene:GRMZM2G047274 transcript:GRMZM2G047274_T01 description:"cdna	est omrna|protein"	43	13	36	12	1	421	45.9	6.15	11.589	High	0	173.68	13	2
FALSE	Master Protein	GRMZM2G477236_P01 pep:known chromosome:AGPv3:5:73161019:73163324:1 gene:GRMZM2G477236 transcript:GRMZM2G477236_T01 description:"cdna	est omrna|protein"	44	14	41	8	1	246	27.1	5.54	36.276	High	0	173.31	14	6
FALSE	Master Protein	GRMZM5G828182_P02	pep:known chromosome:AGPv3:4:197148475:197156267:-1 gene:GRMZM5G828182 transcript:GRMZM5G828182_T02 description:"est|mrna"	58	22	41	17	1	511	56.6	8.06	5.739	High	0	173.29	22	6
FALSE	Master Protein	GRMZM2G140667_P01 pep:known chromosome:AGPv3:2:219258176:219261097:-1 gene:GRMZM2G140667 transcript:GRMZM2G140667_T01 description:"cdna	est omrna|protein"	56	12	39	11	1	286	30.9	6.18	9	High	0	172.87	12	0
FALSE	Master Protein	GRMZM2G157596_P01 pep:known chromosome:AGPv3:6:155438310:155443334:-1 gene:GRMZM2G157596 transcript:GRMZM2G157596_T01 description:"est	omrna protein"	42	9	40	1	1	199	22.7	7.03	67.129	High	0	172.81	9	0
FALSE	Master Protein	GRMZM2G079888_P01 pep:known chromosome:AGPv3:2:237069904:237075210:-1 gene:GRMZM2G079888 transcript:GRMZM2G079888_T01 description:"cdna	est omrna|protein"	42	21	40	2	1	700	76.7	8.13	3.725	High	0	172.79	21	20
FALSE	Master Protein	GRMZM2G048012_P01	pep:known chromosome:AGPv3:3:8594070:8599931:1 gene:GRMZM2G048012 transcript:GRMZM2G048012_T01 description:"est"	41	27	44	4	1	764	86.6	6.62	4.834	High	0	172.69	27	0
FALSE	Master Protein	GRMZM2G009323_P01 pep:known chromosome:AGPv3:10:145229818:145234017:1 gene:GRMZM2G009323 transcript:GRMZM2G009323_T01 description:"cdna	est omrna|protein"	34	18	41	1	1	612	63.9	7.28	5.661	High	0	172.51	18	0
FALSE	Master Protein	GRMZM2G161673_P01 pep:known chromosome:AGPv3:6:65650702:65652341:1 gene:GRMZM2G161673 transcript:GRMZM2G161673_T01 description:"cdna	est omrna|protein"	41	18	45	18	1	324	34.5	9.11	25.367	High	0	172.5	18	0
FALSE	Master Protein	GRMZM2G359038_P02 pep:known chromosome:AGPv3:5:157562012:157565372:-1 gene:GRMZM2G359038 transcript:GRMZM2G359038_T02 description:"est	omrna protein"	23	16	45	9	1	630	68.1	9.52	4.179	High	0	172.12	16	8
FALSE	Master Protein	GRMZM2G084958_P01 pep:known chromosome:AGPv3:2:1463875:1465462:-1 gene:GRMZM2G084958 transcript:GRMZM2G084958_T01 description:"cdna	est omrna|protein"	47	16	48	10	1	387	41.2	9.44	9.89	High	0	172.09	16	0
FALSE	Master Protein	GRMZM2G073465_P03	pep:known chromosome:AGPv3:10:144912181:144916257:-1 gene:GRMZM2G073465 transcript:GRMZM2G073465_T03 description:"protein"	33	11	39	5	1	469	50.7	5.19	6.079	High	0	171.89	11	6
FALSE	Master Protein	GRMZM2G088114_P01 pep:known chromosome:AGPv3:5:69340699:69351172:1 gene:GRMZM2G088114 transcript:GRMZM2G088114_T01 description:"cdna	est omrna|protein"	39	29	40	29	1	791	87.1	5.38	3.962	High	0	171.55	29	0
FALSE	Master Protein	GRMZM2G163421_P01 pep:known chromosome:AGPv3:2:221208466:221212560:1 gene:GRMZM2G163421 transcript:GRMZM2G163421_T01 description:"cdna	est omrna|protein"	47	24	43	11	1	512	56.6	5.05	7.799	High	0	171.39	24	0
FALSE	Master Protein	GRMZM2G135498_P01 pep:known chromosome:AGPv3:6:107993578:107997950:-1 gene:GRMZM2G135498 transcript:GRMZM2G135498_T01 description:"cdna	est omrna|protein"	51	14	38	5	1	461	48.8	7.66	18.953	High	0	171.08	14	10
FALSE	Master Protein	GRMZM2G010637_P02 pep:known chromosome:AGPv3:9:38293369:38312734:-1 gene:GRMZM2G010637 transcript:GRMZM2G010637_T02 description:"cdna	est omrna|protein"	25	39	44	23	1	1835	205.3	7.78	1.738	High	0	170.78	39	16
FALSE	Master Protein	GRMZM2G056569_P01 pep:known chromosome:AGPv3:7:174627507:174630543:-1 gene:GRMZM2G056569 transcript:GRMZM2G056569_T01 description:"cdna	est omrna|protein"	55	22	45	5	1	447	49.4	6.21	13.874	High	0	170.64	22	17
FALSE	Master Protein	GRMZM5G800980_P01	pep:known chromosome:AGPv3:Pt:50535:52367:-1 gene:GRMZM5G800980 transcript:GRMZM5G800980_T01 description:"omrna"	47	8	38	8	1	255	28.6	9.17	9	High	0	170.32	8	0
FALSE	Master Protein	GRMZM2G073312_P01 pep:known chromosome:AGPv3:6:98164281:98178284:1 gene:GRMZM2G073312 transcript:GRMZM2G073312_T01 description:"cdna	est omrna|protein"	25	26	42	9	1	1251	138.7	6.35	2.217	High	0	170.26	26	0
FALSE	Master Protein	GRMZM2G701082_P06	pep:known chromosome:AGPv3:6:113738136:113741258:-1 gene:GRMZM2G701082 transcript:GRMZM2G701082_T06 description:"est"	50	16	32	16	1	377	40.7	5.05	30.623	High	0	170.2	16	0
FALSE	Master Protein	GRMZM2G104632_P01	pep:known chromosome:AGPv3:5:85290278:85295276:1 gene:GRMZM2G104632 transcript:GRMZM2G104632_T01 description:"est|mrna"	50	16	43	5	1	411	43.4	8.6	4.412	High	0	169.91	16	7
FALSE	Master Protein	GRMZM2G028313_P03 pep:known chromosome:AGPv3:2:87396552:87420076:1 gene:GRMZM2G028313 transcript:GRMZM2G028313_T03 description:"cdna	est omrna|protein"	33	19	40	16	1	541	59.3	5.88	6.686	High	0	169.76	19	3
FALSE	Master Protein	GRMZM2G457621_P01 pep:known chromosome:AGPv3:2:1361783:1363354:1 gene:GRMZM2G457621 transcript:GRMZM2G457621_T01 description:"cdna	est omrna|protein"	56	19	39	19	1	463	50.9	5.41	10.938	High	0	169.63	19	0
FALSE	Master Protein	GRMZM2G439201_P02 pep:known chromosome:AGPv3:7:171672556:171675255:1 gene:GRMZM2G439201 transcript:GRMZM2G439201_T02 description:"cdna	est omrna|protein"	35	10	42	9	1	286	31.1	5.48	24.119	High	0	169.56	10	1
FALSE	Master Protein	GRMZM2G404025_P01	pep:known chromosome:AGPv3:3:109831163:109832253:1 gene:GRMZM2G404025 transcript:GRMZM2G404025_T01 description:"est|omrna"	76	11	41	11	1	159	18.7	6.52	55.234	High	0	169.29	11	0
FALSE	Master Protein	GRMZM5G877316_P03	pep:known chromosome:AGPv3:2:126327154:126341844:1 gene:GRMZM5G877316 transcript:GRMZM5G877316_T03 description:"est"	59	24	43	9	1	415	47.7	5.67	11.69	High	0	169.25	24	15
FALSE	Master Protein	GRMZM2G090338_P01 pep:known chromosome:AGPv3:6:157217904:157222724:-1 gene:GRMZM2G090338 transcript:GRMZM2G090338_T01 description:"cdna	est omrna|protein"	41	22	41	22	1	635	69.9	8.69	6.263	High	0	169.09	22	0
FALSE	Master Protein	GRMZM2G349062_P01 pep:known chromosome:AGPv3:1:290206796:290209672:1 gene:GRMZM2G349062 transcript:GRMZM2G349062_T01 description:"abinitio	cdna omrna"	46	22	41	21	1	525	58.9	9	6.128	High	0	168.94	22	1
FALSE	Master Protein	GRMZM2G410515_P01	pep:known chromosome:AGPv3:1:17660122:17666235:1 gene:GRMZM2G410515 transcript:GRMZM2G410515_T01 description:"cdna"	36	18	42	18	1	571	64.1	7.99	7.111	High	0	168.26	18	0
FALSE	Master Protein	GRMZM2G074790_P03 pep:known chromosome:AGPv3:6:161921394:161927125:-1 gene:GRMZM2G074790 transcript:GRMZM2G074790_T03 description:"est	omrna protein"	44	25	41	20	1	648	68.9	8.53	4.109	High	0	167.94	25	0
FALSE	Master Protein	AC211737.3_FGP012	pep:known chromosome:AGPv3:5:193210576:193218287:1 gene:AC211737.3_FG012 transcript:AC211737.3_FGT012 description:"abinitio"	42	27	42	27	1	704	75.3	5.5	5.579	High	0	167.53	27	0
FALSE	Master Protein	GRMZM2G094051_P03 pep:known chromosome:AGPv3:10:140775982:140778570:1 gene:GRMZM2G094051 transcript:GRMZM2G094051_T03 description:"cdna	est protein"	68	20	43	2	1	244	28.4	10.1	45.416	High	0	167.29	20	0
FALSE	Master Protein	GRMZM5G806449_P01	pep:known chromosome:AGPv3:5:215337736:215346511:1 gene:GRMZM5G806449 transcript:GRMZM5G806449_T01 description:"est"	48	18	36	18	1	495	53.1	6.39	8.261	High	0	167.25	18	0
FALSE	Master Protein	GRMZM2G085909_P01 pep:known chromosome:AGPv3:1:3824197:3828489:1 gene:GRMZM2G085909 transcript:GRMZM2G085909_T01 description:"cdna	est omrna|protein"	53	26	39	8	1	535	57.7	7.21	9.746	High	0	167.13	26	18
FALSE	Master Protein	GRMZM2G054559_P01 pep:known chromosome:AGPv3:3:12195404:12200349:1 gene:GRMZM2G054559 transcript:GRMZM2G054559_T01 description:"cdna	est omrna|protein"	37	23	40	9	1	812	92.2	5.6	3.571	High	0	167.02	23	0
FALSE	Master Protein	GRMZM2G090087_P02	pep:known chromosome:AGPv3:6:161650053:161657588:-1 gene:GRMZM2G090087 transcript:GRMZM2G090087_T02 description:"est"	51	21	40	21	1	549	60.5	7.31	10.659	High	0	166.97	21	0
FALSE	Master Protein	GRMZM5G855672_P02	pep:known chromosome:AGPv3:8:132704679:132707776:1 gene:GRMZM5G855672 transcript:GRMZM5G855672_T02 description:"est"	64	11	37	5	1	214	23.3	5.82	24.119	High	0	166.7	11	5
FALSE	Master Protein	GRMZM5G868433_P01	pep:known chromosome:AGPv3:2:11594965:11597699:-1 gene:GRMZM5G868433 transcript:GRMZM5G868433_T01 description:"est"	71	21	43	3	1	244	28.5	10.08	45.416	High	0	166.68	21	18
FALSE	Master Protein	GRMZM2G129451_P02	pep:known chromosome:AGPv3:9:17640522:17651280:1 gene:GRMZM2G129451 transcript:GRMZM2G129451_T02 description:"est|protein"	35	17	37	17	1	640	70.5	6.01	5.898	High	0	166.54	17	0
FALSE	Master Protein	GRMZM5G892645_P02	pep:known chromosome:AGPv3:8:78161674:78166588:1 gene:GRMZM5G892645 transcript:GRMZM5G892645_T02 description:"est"	60	22	42	22	1	429	48.6	5.91	9.798	High	0	166.49	22	0
FALSE	Master Protein	GRMZM2G089696_P01 pep:known chromosome:AGPv3:5:6581302:6584182:-1 gene:GRMZM2G089696 transcript:GRMZM2G089696_T01 description:"cdna	est omrna|protein"	53	19	38	19	1	401	44.5	6.05	9	High	0	166.49	19	0
FALSE	Master Protein	GRMZM2G011129_P01 pep:known chromosome:AGPv3:7:46493910:46497427:1 gene:GRMZM2G011129 transcript:GRMZM2G011129_T01 description:"cdna	est omrna|protein"	36	8	41	8	1	303	33.1	4.72	7.733	High	0	166.29	8	0
FALSE	Master Protein	GRMZM2G480002_P01 pep:known chromosome:AGPv3:7:4543316:4550902:1 gene:GRMZM2G480002 transcript:GRMZM2G480002_T01 description:"cdna	est protein"	27	32	41	32	1	1706	186.5	6.35	1.407	High	0	166.02	32	0
FALSE	Master Protein	AC234203.1_FGP004	pep:novel chromosome:AGPv3:1:188116698:188123026:-1 gene:AC234203.1_FG004 transcript:AC234203.1_FGT004 description:"abinitio"	25	29	41	28	1	1496	165.1	8.02	1.629	High	0	165.97	29	0
FALSE	Master Protein	GRMZM2G169160_P03 pep:known chromosome:AGPv3:4:5671135:5682556:-1 gene:GRMZM2G169160 transcript:GRMZM2G169160_T03 description:"cdna	est omrna|protein"	40	18	41	18	1	512	56.1	6.34	5.898	High	0	165.89	18	0
FALSE	Master Protein	GRMZM2G085054_P02 pep:known chromosome:AGPv3:4:3214647:3216558:-1 gene:GRMZM2G085054 transcript:GRMZM2G085054_T02 description:"cdna	est omrna|protein"	44	16	40	15	1	459	49.4	5.71	11.023	High	0	165.6	16	0
FALSE	Master Protein	AC211349.4_FGP001	pep:novel chromosome:AGPv3:8:175178619:175184508:1 gene:AC211349.4_FG001 transcript:AC211349.4_FGT001 description:"abinitio"	45	19	41	5	1	394	44.8	6.43	9	High	0	165.36	19	0
FALSE	Master Protein	GRMZM2G137985_P01 pep:known chromosome:AGPv3:9:148149504:148154713:1 gene:GRMZM2G137985 transcript:GRMZM2G137985_T01 description:"cdna	est omrna|protein"	62	16	38	4	1	275	29.2	9.16	19.535	High	0	165.23	16	0
FALSE	Master Protein	GRMZM2G072280_P03	pep:known chromosome:AGPv3:7:160294906:160296695:1 gene:GRMZM2G072280 transcript:GRMZM2G072280_T03 description:"cdna|protein"	21	4	38	4	1	270	29.2	5.95	11.589	High	0	165.14	4	0
FALSE	Master Protein	GRMZM2G124886_P03	pep:known chromosome:AGPv3:5:157316628:157327230:1 gene:GRMZM2G124886 transcript:GRMZM2G124886_T03 description:"est|protein"	30	27	41	3	1	924	104.4	4.92	4.08	High	0	165.11	27	0
FALSE	Master Protein	AC195340.3_FGP001	pep:known chromosome:AGPv3:5:5434731:5437116:-1 gene:AC195340.3_FG001 transcript:AC195340.3_FGT001 description:"abinitio"	48	18	41	4	1	450	49.5	5.24	15.156	High	0	164.82	18	0
FALSE	Master Protein	GRMZM2G098239_P01 pep:known chromosome:AGPv3:2:10630672:10633711:-1 gene:GRMZM2G098239 transcript:GRMZM2G098239_T01 description:"cdna	est omrna|protein"	42	16	37	16	1	426	45.8	5.52	6.11	High	0	164.4	16	0
FALSE	Master Protein	GRMZM2G156713_P01 pep:novel chromosome:AGPv3:8:12285354:12288966:1 gene:GRMZM2G156713 transcript:GRMZM2G156713_T01 description:"est	omrna protein"	53	21	38	21	1	481	52.4	6.71	9	High	0	164.33	21	0
FALSE	Master Protein	GRMZM2G403636_P01 pep:known chromosome:AGPv3:4:7265355:7269838:1 gene:GRMZM2G403636 transcript:GRMZM2G403636_T01 description:"cdna	est omrna|protein"	49	23	40	19	1	608	64.5	7.9	6.386	High	0	164.09	23	0
FALSE	Master Protein	GRMZM2G397247_P03 pep:known chromosome:AGPv3:5:58558043:58563365:-1 gene:GRMZM2G397247 transcript:GRMZM2G397247_T03 description:"cdna	est omrna"	42	24	36	24	1	633	68.5	9.22	5.31	High	0	164.07	24	0
FALSE	Master Protein	GRMZM2G574782_P01	pep:known chromosome:AGPv3:4:18698890:18705585:1 gene:GRMZM2G574782 transcript:GRMZM2G574782_T01 description:"est|mrna"	38	19	40	16	1	517	56.9	6.19	11.798	High	0	163.97	19	3
FALSE	Master Protein	GRMZM2G119852_P01 pep:known chromosome:AGPv3:1:15773077:15777890:-1 gene:GRMZM2G119852 transcript:GRMZM2G119852_T01 description:"cdna	est omrna|protein"	47	22	40	20	1	484	51.9	7.14	10.788	High	0	163.95	22	2
FALSE	Master Protein	GRMZM2G180399_P01	pep:known chromosome:AGPv3:8:161386924:161390467:1 gene:GRMZM2G180399 transcript:GRMZM2G180399_T01 description:"est"	53	18	39	1	1	392	44.4	6.54	9.926	High	0	163.78	18	17
FALSE	Master Protein	GRMZM2G450233_P01 pep:known chromosome:AGPv3:6:125337844:125340176:1 gene:GRMZM2G450233 transcript:GRMZM2G450233_T01 description:"cdna	est omrna|protein"	40	13	46	8	1	357	37.9	8	11.452	High	0	163.58	13	7
FALSE	Master Protein	GRMZM2G090722_P01 pep:known chromosome:AGPv3:3:231685690:231696565:-1 gene:GRMZM2G090722 transcript:GRMZM2G090722_T01 description:"cdna	est omrna|protein"	40	16	41	8	1	486	53.1	7.43	5.813	High	0	163.44	16	8
FALSE	Master Protein	AC155377.1_FGP001	pep:known chromosome:AGPv3:3:220967145:220986200:-1 gene:AC155377.1_FG001 transcript:AC155377.1_FGT001 description:"est|mrna"	25	33	43	29	1	1529	173.4	8.38	1.265	High	0	163.39	33	4
FALSE	Master Protein	GRMZM2G412470_P02	pep:known chromosome:AGPv3:6:6320153:6326145:-1 gene:GRMZM2G412470 transcript:GRMZM2G412470_T02 description:"est"	38	23	38	22	1	720	78.9	5.36	5.176	High	0	163.31	23	1
FALSE	Master Protein	GRMZM2G143870_P02	pep:known chromosome:AGPv3:7:71344460:71346406:1 gene:GRMZM2G143870 transcript:GRMZM2G143870_T02 description:"cdna|est"	49	12	37	12	1	251	27.2	8.66	14.013	High	0	163.25	12	0
FALSE	Master Protein	GRMZM2G068244_P01 pep:known chromosome:AGPv3:1:293721545:293724059:-1 gene:GRMZM2G068244 transcript:GRMZM2G068244_T01 description:"cdna	est omrna|protein"	63	13	36	10	1	257	27.7	7.33	53.117	High	0	163.14	13	0
FALSE	Master Protein	GRMZM2G036290_P01	pep:known chromosome:AGPv3:8:8094882:8101495:1 gene:GRMZM2G036290 transcript:GRMZM2G036290_T01 description:"est|protein"	47	20	39	4	1	475	51.5	6.95	9	High	0	163.01	20	0
FALSE	Master Protein	GRMZM2G076006_P03	pep:known chromosome:AGPv3:6:133389789:133410073:-1 gene:GRMZM2G076006 transcript:GRMZM2G076006_T03 description:"est"	35	12	44	10	1	347	38.3	6.58	6.743	High	0	162.67	12	3
FALSE	Master Protein	GRMZM2G314898_P01 pep:known chromosome:AGPv3:3:8300533:8304232:-1 gene:GRMZM2G314898 transcript:GRMZM2G314898_T01 description:"abinitio	cdna est|omrna"	48	16	39	16	1	417	46.1	5.64	10.938	High	0	162.47	16	0
FALSE	Master Protein	GRMZM2G123277_P01 pep:known chromosome:AGPv3:3:198017608:198022549:-1 gene:GRMZM2G123277 transcript:GRMZM2G123277_T01 description:"cdna	est omrna|protein"	30	21	37	6	1	912	101.4	5.47	2.981	High	0	162.37	21	0
FALSE	Master Protein	GRMZM2G035417_P01 pep:known chromosome:AGPv3:9:32078633:32089472:1 gene:GRMZM2G035417 transcript:GRMZM2G035417_T01 description:"cdna	est omrna|protein"	41	12	32	11	1	405	42.6	4.69	24.119	High	0	162.27	12	1
FALSE	Master Protein	GRMZM2G163471_P01 pep:known chromosome:AGPv3:2:37953940:37958488:1 gene:GRMZM2G163471 transcript:GRMZM2G163471_T01 description:"cdna	est omrna|protein"	59	28	40	19	1	528	57	9.28	6.017	High	0	162.17	28	9
FALSE	Master Protein	GRMZM5G852502_P01	pep:known chromosome:AGPv3:3:160709513:160714196:1 gene:GRMZM5G852502 transcript:GRMZM5G852502_T01 description:"est"	53	18	39	1	1	396	45.1	7.31	9	High	0	162.03	18	0
FALSE	Master Protein	GRMZM2G122479_P01 pep:known chromosome:AGPv3:6:139464390:139470075:1 gene:GRMZM2G122479 transcript:GRMZM2G122479_T01 description:"cdna	omrna protein"	22	13	45	7	1	663	73.2	7.2	1.572	High	0	161.65	13	0
FALSE	Master Protein	GRMZM2G082581_P01	pep:known chromosome:AGPv3:2:30604487:30610357:1 gene:GRMZM2G082581 transcript:GRMZM2G082581_T01 description:"cdna"	57	18	36	13	1	322	36.4	6.95	10.053	High	0	161	18	0
FALSE	Master Protein	GRMZM2G132903_P01 pep:known chromosome:AGPv3:8:40263840:40270804:-1 gene:GRMZM2G132903 transcript:GRMZM2G132903_T01 description:"cdna	est omrna|protein"	44	26	41	26	1	723	79	8.66	6.017	High	0	160.69	26	0
FALSE	Master Protein	GRMZM2G003384_P01 pep:known chromosome:AGPv3:5:179438316:179440546:1 gene:GRMZM2G003384 transcript:GRMZM2G003384_T01 description:"cdna	est omrna|protein"	45	16	39	4	1	279	30.8	10.23	14.199	High	0	160.58	16	12
FALSE	Master Protein	GRMZM2G143008_P01	pep:known chromosome:AGPv3:5:164024379:164026683:1 gene:GRMZM2G143008 transcript:GRMZM2G143008_T01 description:"est"	43	20	35	12	1	638	68.9	7.17	4.817	High	0	160.48	20	9
FALSE	Master Protein	GRMZM2G169516_P02	pep:known chromosome:AGPv3:10:124079419:124084329:-1 gene:GRMZM2G169516 transcript:GRMZM2G169516_T02 description:"cdna|est"	49	19	40	19	1	417	44.8	6.92	12.183	High	0	160.35	19	0
FALSE	Master Protein	GRMZM2G011213_P01 pep:known chromosome:AGPv3:8:14070896:14073613:-1 gene:GRMZM2G011213 transcript:GRMZM2G011213_T01 description:"cdna	est omrna|protein"	40	11	33	11	1	274	30	4.63	36.276	High	0	160.23	11	0
FALSE	Master Protein	GRMZM2G181273_P01 pep:known chromosome:AGPv3:5:198623031:198627328:1 gene:GRMZM2G181273 transcript:GRMZM2G181273_T01 description:"cdna	est omrna|protein"	57	19	39	19	1	447	49.1	5.71	9.89	High	0	159.83	19	0
FALSE	Master Protein	GRMZM2G024484_P01	pep:known chromosome:AGPv3:7:170285189:170288776:1 gene:GRMZM2G024484 transcript:GRMZM2G024484_T01 description:"est|mrna"	52	18	34	1	1	504	55.2	8.02	7.62	High	0	159.67	18	18
FALSE	Master Protein	GRMZM2G410393_P04 pep:known chromosome:AGPv3:5:78853855:78860580:1 gene:GRMZM2G410393 transcript:GRMZM2G410393_T04 description:"cdna	est omrna|protein"	32	32	39	32	1	1280	141.9	5.95	2.215	High	0	159.35	32	0
FALSE	Master Protein	GRMZM2G040209_P01	pep:known chromosome:AGPv3:2:214723508:214726931:1 gene:GRMZM2G040209 transcript:GRMZM2G040209_T01 description:"mrna|protein"	52	18	34	1	1	504	55.2	7.85	7.62	High	0	159.31	18	0
FALSE	Master Protein	GRMZM2G157470_P01 pep:known chromosome:AGPv3:1:250122582:250128271:1 gene:GRMZM2G157470 transcript:GRMZM2G157470_T01 description:"cdna	est omrna|protein"	80	22	37	22	1	364	38.3	4.55	17.738	High	0	159.13	22	0
FALSE	Master Protein	GRMZM2G111756_P01 pep:known chromosome:AGPv3:4:145268260:145269812:1 gene:GRMZM2G111756 transcript:GRMZM2G111756_T01 description:"cdna	est protein"	20	6	30	1	1	395	42.4	8.53	2.594	High	0	159.12	6	0
FALSE	Master Protein	GRMZM2G009845_P02	pep:known chromosome:AGPv3:6:127679257:127684735:-1 gene:GRMZM2G009845 transcript:GRMZM2G009845_T02 description:"cdna|protein"	41	17	36	4	1	528	58.1	5.3	7.432	High	0	158.95	17	10
FALSE	Master Protein	GRMZM2G033641_P01 pep:known chromosome:AGPv3:6:148784799:148787678:1 gene:GRMZM2G033641 transcript:GRMZM2G033641_T01 description:"cdna	est protein"	48	26	38	21	1	620	68	4.59	4.854	High	0	158.44	26	5
FALSE	Master Protein	GRMZM2G071208_P01	pep:known chromosome:AGPv3:1:87992429:87998428:1 gene:GRMZM2G071208 transcript:GRMZM2G071208_T01 description:"est|omrna"	34	16	41	11	1	402	43.6	6.39	18.307	High	0	158.31	16	5
FALSE	Master Protein	AC189750.4_FGP004	pep:known chromosome:AGPv3:7:152388543:152391232:-1 gene:AC189750.4_FG004 transcript:AC189750.4_FGT004 description:"abinitio"	38	17	37	6	1	515	56.1	7.64	7.532	High	0	158.29	17	12
FALSE	Master Protein	GRMZM2G107362_P04	pep:known chromosome:AGPv3:4:232013668:232019070:1 gene:GRMZM2G107362 transcript:GRMZM2G107362_T04 description:"omrna|protein"	45	19	39	18	1	477	53.4	8.63	7.111	High	0	158.2	19	0
FALSE	Master Protein	GRMZM2G091119_P01	pep:known chromosome:AGPv3:3:35660410:35666290:1 gene:GRMZM2G091119 transcript:GRMZM2G091119_T01 description:"est|protein"	52	18	36	8	1	526	57.6	5.27	5.404	High	0	158.14	18	10
FALSE	Master Protein	GRMZM2G111014_P01 pep:known chromosome:AGPv3:3:42890011:42907647:-1 gene:GRMZM2G111014 transcript:GRMZM2G111014_T01 description:"cdna	est omrna"	42	25	36	25	1	726	80.2	8.44	4.142	High	0	157.97	25	0
FALSE	Master Protein	GRMZM2G003565_P03	pep:known chromosome:AGPv3:2:49685916:49690865:-1 gene:GRMZM2G003565 transcript:GRMZM2G003565_T03 description:"est|mrna"	45	18	38	18	1	443	47.1	5.66	7.483	High	0	157.93	18	0
FALSE	Master Protein	GRMZM2G109425_P01 pep:known chromosome:AGPv3:2:218300933:218306117:1 gene:GRMZM2G109425 transcript:GRMZM2G109425_T01 description:"cdna	omrna protein"	42	18	36	18	1	535	59.1	6.68	4.436	High	0	157.87	18	0
FALSE	Master Protein	GRMZM2G055489_P02	pep:known chromosome:AGPv3:8:115832258:115838487:-1 gene:GRMZM2G055489 transcript:GRMZM2G055489_T02 description:"est"	40	15	37	14	1	425	47.3	6.16	11.217	High	0	157.72	15	1
FALSE	Master Protein	GRMZM2G127147_P01 pep:known chromosome:AGPv3:6:122910609:122914067:1 gene:GRMZM2G127147 transcript:GRMZM2G127147_T01 description:"abinitio	cdna est"	26	20	40	18	1	843	90.5	6.57	2.54	High	0	157.32	20	2
FALSE	Master Protein	GRMZM2G156816_P06	pep:known chromosome:AGPv3:3:17010135:17012282:-1 gene:GRMZM2G156816 transcript:GRMZM2G156816_T06 description:"est|omrna"	50	18	34	17	1	428	46.6	7.68	9.965	High	0	156.98	18	1
FALSE	Master Protein	GRMZM2G093405_P02	pep:known chromosome:AGPv3:3:3887370:3888723:1 gene:GRMZM2G093405 transcript:GRMZM2G093405_T02 description:"est"	56	11	33	11	1	218	23.6	4.84	45.416	High	0	156.94	11	0
FALSE	Master Protein	GRMZM2G110185_P02	pep:known chromosome:AGPv3:5:212423808:212427681:-1 gene:GRMZM2G110185 transcript:GRMZM2G110185_T02 description:"est|ocdna2"	56	22	41	22	1	426	47.7	6.29	5.813	High	0	156.93	22	0
FALSE	Master Protein	GRMZM2G049811_P01 pep:known chromosome:AGPv3:9:49446265:49450529:-1 gene:GRMZM2G049811 transcript:GRMZM2G049811_T01 description:"cdna	est omrna|protein"	52	19	38	18	1	376	41.4	6.8	11.328	High	0	156.84	19	1
FALSE	Master Protein	GRMZM2G070605_P01 pep:known chromosome:AGPv3:8:29722314:29725061:-1 gene:GRMZM2G070605 transcript:GRMZM2G070605_T01 description:"cdna	est protein"	15	9	38	8	1	404	43.7	9.92	7.577	High	0	156.84	9	0
FALSE	Master Protein	GRMZM2G030384_P01 pep:known chromosome:AGPv3:8:10871147:10877296:1 gene:GRMZM2G030384 transcript:GRMZM2G030384_T01 description:"cdna	est protein"	45	21	36	21	1	609	66.2	6.71	6.055	High	0	156.75	21	0
FALSE	Master Protein	GRMZM2G019919_P01 pep:known chromosome:AGPv3:2:21882159:21886876:1 gene:GRMZM2G019919 transcript:GRMZM2G019919_T01 description:"abinitio	cdna est"	41	25	41	20	1	794	88.7	5.6	4.289	High	0	156.6	25	5
FALSE	Master Protein	GRMZM5G838396_P01	pep:known chromosome:AGPv3:Pt:81113:82518:-1 gene:GRMZM5G838396 transcript:GRMZM5G838396_T01 description:"mrna|protein"	57	17	41	17	1	224	25.9	9.74	53.117	High	0	156.42	17	0
FALSE	Master Protein	GRMZM2G155580_P02 pep:known chromosome:AGPv3:1:293065827:293074599:1 gene:GRMZM2G155580 transcript:GRMZM2G155580_T02 description:"cdna	est omrna|protein"	40	20	35	20	1	611	67.7	5.22	4.275	High	0	156.42	20	0
FALSE	Master Protein	GRMZM2G055025_P01 pep:known chromosome:AGPv3:1:22628423:22632521:1 gene:GRMZM2G055025 transcript:GRMZM2G055025_T01 description:"cdna	est omrna|protein"	65	17	37	5	1	275	29.2	9.07	14.013	High	0	156.07	17	12
FALSE	Master Protein	GRMZM2G150616_P01 pep:known chromosome:AGPv3:2:177290831:177294514:1 gene:GRMZM2G150616 transcript:GRMZM2G150616_T01 description:"cdna	est omrna|protein"	54	11	35	8	1	276	29.5	8.22	14.013	High	0	155.9	11	3
FALSE	Master Protein	GRMZM2G019926_P03 pep:known chromosome:AGPv3:1:171508696:171515053:1 gene:GRMZM2G019926 transcript:GRMZM2G019926_T03 description:"cdna	omrna protein"	41	21	33	21	1	751	81.5	6.99	2.467	High	0	155.67	21	0
FALSE	Master Protein	GRMZM2G117531_P04 pep:known chromosome:AGPv3:10:144548085:144553544:-1 gene:GRMZM2G117531 transcript:GRMZM2G117531_T04 description:"cdna	est omrna|protein"	43	14	35	14	1	403	43.3	5.95	9	High	0	155.49	14	0
FALSE	Master Protein	GRMZM2G303655_P01 pep:known chromosome:AGPv3:10:13166108:13181015:-1 gene:GRMZM2G303655 transcript:GRMZM2G303655_T01 description:"cdna	est omrna|protein"	49	26	38	4	1	653	77.2	6.4	3.489	High	0	155.34	26	0
FALSE	Master Protein	GRMZM2G035985_P01	pep:known chromosome:AGPv3:2:215498779:215518573:1 gene:GRMZM2G035985 transcript:GRMZM2G035985_T01 description:"cdna|est"	29	25	35	12	1	1129	121.9	5.52	2.831	High	0	155.27	25	13
FALSE	Master Protein	GRMZM2G113267_P02 pep:known chromosome:AGPv3:9:155053479:155056903:1 gene:GRMZM2G113267 transcript:GRMZM2G113267_T02 description:"cdna	est omrna|protein"	48	26	38	25	1	655	72.4	8.6	5.683	High	0	155.06	26	1
FALSE	Master Protein	GRMZM2G077206_P01 pep:known chromosome:AGPv3:8:136446031:136447290:1 gene:GRMZM2G077206 transcript:GRMZM2G077206_T01 description:"cdna	est omrna|protein"	41	11	36	11	1	237	25.2	5.63	17.478	High	0	154.95	11	0
FALSE	Master Protein	GRMZM2G010960_P01 pep:known chromosome:AGPv3:6:114357794:114367987:-1 gene:GRMZM2G010960 transcript:GRMZM2G010960_T01 description:"cdna	est omrna"	31	30	38	30	1	1453	156.5	4.68	1.894	High	0	154.9	30	0
FALSE	Master Protein	GRMZM2G334628_P02 pep:known chromosome:AGPv3:3:15220879:15230827:-1 gene:GRMZM2G334628 transcript:GRMZM2G334628_T02 description:"abinitio	cdna est|omrna"	15	12	41	1	1	676	73.9	6.38	2.472	High	0	154.82	12	0
FALSE	Master Protein	GRMZM2G016236_P01 pep:known chromosome:AGPv3:2:237638693:237642179:1 gene:GRMZM2G016236 transcript:GRMZM2G016236_T01 description:"cdna	est omrna"	37	14	37	14	1	375	40.5	9.01	10.159	High	0	154.69	14	0
FALSE	Master Protein	GRMZM6G924006_P01	pep:known chromosome:AGPv3:1:151734051:151736151:1 gene:GRMZM6G924006 transcript:GRMZM6G924006_T01 description:"cdna"	33	13	37	13	1	335	37.9	5.97	10.007	High	0	154.65	13	0
FALSE	Master Protein	GRMZM2G058870_P01 pep:known chromosome:AGPv3:1:34669230:34678054:1 gene:GRMZM2G058870 transcript:GRMZM2G058870_T01 description:"cdna	est omrna|protein"	23	32	38	30	1	1795	198.1	5.52	1.204	High	0	154.19	32	2
FALSE	Master Protein	GRMZM2G573867_P01	pep:known chromosome:AGPv3:2:197009518:197013583:-1 gene:GRMZM2G573867 transcript:GRMZM2G573867_T01 description:"est"	38	14	37	5	1	440	47.6	7.47	5.422	High	0	154.14	14	10
FALSE	Master Protein	GRMZM2G062394_P01 pep:known chromosome:AGPv3:1:290174531:290179401:1 gene:GRMZM2G062394 transcript:GRMZM2G062394_T01 description:"cdna	est omrna|protein"	44	12	34	3	1	307	35.2	5.33	19.691	High	0	154.02	12	12
FALSE	Master Protein	GRMZM5G824600_P03	pep:known chromosome:AGPv3:5:215541812:215545867:1 gene:GRMZM5G824600 transcript:GRMZM5G824600_T03 description:"est"	42	12	35	11	1	381	40.8	7.02	9	High	0	153.81	12	0
FALSE	Master Protein	GRMZM2G006363_P01 pep:known chromosome:AGPv3:4:3896746:3898889:-1 gene:GRMZM2G006363 transcript:GRMZM2G006363_T01 description:"cdna	est omrna"	51	28	37	28	1	553	59.3	4.75	5.516	High	0	153.75	28	0
FALSE	Master Protein	GRMZM2G033644_P01 pep:known chromosome:AGPv3:3:57146894:57151950:1 gene:GRMZM2G033644 transcript:GRMZM2G033644_T01 description:"cdna	est omrna|protein"	54	22	35	22	1	523	56.8	8.03	8.284	High	0	153.73	22	0
FALSE	Master Protein	GRMZM2G385287_P01 pep:known chromosome:AGPv3:6:56376148:56378346:-1 gene:GRMZM2G385287 transcript:GRMZM2G385287_T01 description:"cdna	est omrna|protein"	61	12	41	2	1	190	21.4	9.7	19.309	High	0	153.73	12	10
FALSE	Master Protein	GRMZM2G013324_P01 pep:known chromosome:AGPv3:5:179056239:179061429:1 gene:GRMZM2G013324 transcript:GRMZM2G013324_T01 description:"cdna	est omrna|protein"	28	17	34	11	1	750	81.2	5.52	4.623	High	0	153.65	17	6
FALSE	Master Protein	GRMZM2G030731_P01 pep:known chromosome:AGPv3:7:165283016:165284039:-1 gene:GRMZM2G030731 transcript:GRMZM2G030731_T01 description:"cdna	est omrna|protein"	48	9	39	2	1	145	16	10.68	76.426	High	0	153.62	9	0
FALSE	Master Protein	GRMZM2G013457_P01	pep:novel chromosome:AGPv3:1:22937609:22939512:-1 gene:GRMZM2G013457 transcript:GRMZM2G013457_T01 description:"est"	60	17	38	1	1	188	21.7	10.1	48.239	High	0	153.39	17	0
FALSE	Master Protein	GRMZM2G100462_P02	pep:known chromosome:AGPv3:6:90208997:90211653:-1 gene:GRMZM2G100462 transcript:GRMZM2G100462_T02 description:"est|protein"	49	10	32	6	1	153	16.7	10.4	128.155	High	0	153.33	10	4
FALSE	Master Protein	GRMZM2G109130_P01 pep:known chromosome:AGPv3:1:264266381:264271190:1 gene:GRMZM2G109130 transcript:GRMZM2G109130_T01 description:"cdna	est omrna|protein"	39	27	37	22	1	864	96.4	6.09	3.047	High	0	153.31	27	2
FALSE	Master Protein	GRMZM2G336815_P01 pep:known chromosome:AGPv3:8:18450622:18453661:-1 gene:GRMZM2G336815 transcript:GRMZM2G336815_T01 description:"cdna	est protein"	52	18	36	18	1	415	46.3	5.25	13.065	High	0	153.27	18	0
FALSE	Master Protein	GRMZM2G119249_P02 pep:known chromosome:AGPv3:1:151032331:151036008:1 gene:GRMZM2G119249 transcript:GRMZM2G119249_T02 description:"cdna	est omrna|protein"	58	14	38	14	1	273	30.1	6.14	30.623	High	0	152.88	14	0
FALSE	Master Protein	GRMZM2G015401_P01 pep:known chromosome:AGPv3:5:210219241:210223953:-1 gene:GRMZM2G015401 transcript:GRMZM2G015401_T01 description:"cdna	est omrna|protein"	41	15	38	15	1	366	38.6	9.19	13.925	High	0	152.86	15	0
FALSE	Master Protein	GRMZM2G010349_P02	pep:known chromosome:AGPv3:6:162569887:162583200:-1 gene:GRMZM2G010349 transcript:GRMZM2G010349_T02 description:"est"	37	21	39	21	1	562	63	9.35	5.391	High	0	152.37	21	0
FALSE	Master Protein	GRMZM2G094699_P01 pep:known chromosome:AGPv3:2:136587334:136592357:1 gene:GRMZM2G094699 transcript:GRMZM2G094699_T01 description:"cdna	est omrna|protein"	27	20	34	6	1	952	105.3	5.85	1.859	High	0	152.36	20	0
FALSE	Master Protein	GRMZM2G033894_P01 pep:known chromosome:AGPv3:2:111526532:111530450:-1 gene:GRMZM2G033894 transcript:GRMZM2G033894_T01 description:"cdna	est omrna|protein"	40	19	35	19	1	428	46.4	6.89	10.86	High	0	152	19	0
FALSE	Master Protein	GRMZM2G072315_P01 pep:known chromosome:AGPv3:5:6874095:6876011:-1 gene:GRMZM2G072315 transcript:GRMZM2G072315_T01 description:"cdna	est omrna|protein"	54	14	42	5	1	206	23.6	10.21	41.17	High	0	151.87	14	11
FALSE	Master Protein	GRMZM2G069765_P01 pep:known chromosome:AGPv3:1:25379816:25386682:-1 gene:GRMZM2G069765 transcript:GRMZM2G069765_T01 description:"cdna	est omrna|protein"	44	24	38	3	1	558	60.7	6.68	4.471	High	0	151.63	24	21
FALSE	Master Protein	GRMZM2G110277_P01 pep:known chromosome:AGPv3:3:171482816:171487215:1 gene:GRMZM2G110277 transcript:GRMZM2G110277_T01 description:"cdna	est omrna|protein"	46	11	43	11	1	272	29.8	9.42	6.848	High	0	151.53	11	0
FALSE	Master Protein	GRMZM2G018508_P01 pep:known chromosome:AGPv3:7:7153306:7174594:-1 gene:GRMZM2G018508 transcript:GRMZM2G018508_T01 description:"cdna	est omrna|protein"	39	35	41	10	1	1017	119.6	6.25	2.981	High	0	151.47	35	18
FALSE	Master Protein	GRMZM2G121075_P01 pep:known chromosome:AGPv3:4:158585800:158587210:-1 gene:GRMZM2G121075 transcript:GRMZM2G121075_T01 description:"cdna	est omrna|protein"	62	9	37	1	1	166	17.8	8.97	49.119	High	0	151.41	9	0
FALSE	Master Protein	GRMZM2G022192_P01	pep:known chromosome:AGPv3:2:6050460:6054774:1 gene:GRMZM2G022192 transcript:GRMZM2G022192_T01 description:"est"	38	14	31	14	1	544	57.1	6.35	6.814	High	0	151.33	14	0
FALSE	Master Protein	GRMZM2G071268_P01 pep:known chromosome:AGPv3:1:241056524:241060576:-1 gene:GRMZM2G071268 transcript:GRMZM2G071268_T01 description:"abinitio	est omrna|protein"	39	19	33	19	1	586	64.4	6.57	4.043	High	0	150.91	19	0
FALSE	Master Protein	GRMZM2G134256_P01 pep:known chromosome:AGPv3:8:159933300:159936282:1 gene:GRMZM2G134256 transcript:GRMZM2G134256_T01 description:"cdna	est omrna|protein"	30	13	37	13	1	429	46.2	7.33	4.623	High	0	150.21	13	0
FALSE	Master Protein	GRMZM2G153984_P01	pep:known chromosome:AGPv3:4:120417008:120422812:1 gene:GRMZM2G153984 transcript:GRMZM2G153984_T01 description:"est"	58	12	30	12	1	295	30.6	7.83	24.809	High	0	150.16	12	0
FALSE	Master Protein	GRMZM2G400173_P01	pep:known chromosome:AGPv3:2:200113143:200118845:-1 gene:GRMZM2G400173 transcript:GRMZM2G400173_T01 description:"est|protein"	36	27	39	12	1	1012	115.5	8.91	2.36	High	0	150.02	27	15
FALSE	Master Protein	GRMZM2G013176_P02	pep:known chromosome:AGPv3:3:21559751:21562285:1 gene:GRMZM2G013176 transcript:GRMZM2G013176_T02 description:"est|protein"	37	24	34	24	1	781	85.8	5.68	3.14	High	0	149.75	24	0
FALSE	Master Protein	GRMZM5G874448_P01	pep:known chromosome:AGPv3:Pt:114343:116454:-1 gene:GRMZM5G874448 transcript:GRMZM5G874448_T01 description:"protein"	25	7	33	5	1	362	40.3	4.94	6.499	High	0	149.37	7	0
FALSE	Master Protein	GRMZM2G040511_P02 pep:known chromosome:AGPv3:5:176160522:176171036:1 gene:GRMZM2G040511 transcript:GRMZM2G040511_T02 description:"cdna	est omrna"	34	22	39	22	1	752	84.5	9.23	3.329	High	0	149.22	22	0
FALSE	Master Protein	GRMZM2G047695_P01 pep:known chromosome:AGPv3:3:215609282:215618038:-1 gene:GRMZM2G047695 transcript:GRMZM2G047695_T01 description:"est	omrna protein"	45	15	34	12	1	512	57	5.6	6.814	High	0	148.88	15	3
FALSE	Master Protein	GRMZM2G095348_P01	pep:known chromosome:AGPv3:6:72344558:72373288:-1 gene:GRMZM2G095348 transcript:GRMZM2G095348_T01 description:"cdna|est"	34	27	37	6	1	900	101.7	5.14	3.084	High	0	148.65	27	11
FALSE	Master Protein	GRMZM2G084525_P01 pep:known chromosome:AGPv3:9:131231277:131257604:-1 gene:GRMZM2G084525 transcript:GRMZM2G084525_T01 description:"cdna	est omrna|protein"	27	24	36	24	1	1036	118.7	4.87	2.221	High	0	148.59	24	0
FALSE	Master Protein	AC196489.3_FGP002	pep:known chromosome:AGPv3:2:64574884:64575384:-1 gene:AC196489.3_FG002 transcript:AC196489.3_FGT002 description:"abinitio"	62	9	36	1	1	166	17.7	8.97	49.119	High	0	148.14	9	8
FALSE	Master Protein	GRMZM2G060156_P01 pep:known chromosome:AGPv3:3:211800137:211802644:1 gene:GRMZM2G060156 transcript:GRMZM2G060156_T01 description:"est	omrna protein"	53	15	35	15	1	336	36.5	8.24	6.305	High	0	148.06	15	0
FALSE	Master Protein	GRMZM2G029055_P01 pep:known chromosome:AGPv3:1:20901476:20914811:1 gene:GRMZM2G029055 transcript:GRMZM2G029055_T01 description:"est	omrna protein"	34	18	34	18	1	599	66.6	6.11	4.436	High	0	147.38	18	0
FALSE	Master Protein	GRMZM2G005036_P01 pep:known chromosome:AGPv3:6:160236502:160240676:-1 gene:GRMZM2G005036 transcript:GRMZM2G005036_T01 description:"cdna	est omrna|protein"	44	17	33	15	1	499	53.7	5.94	8.211	High	0	147.32	17	0
FALSE	Master Protein	GRMZM2G157334_P01	pep:known chromosome:AGPv3:8:146798444:146802162:1 gene:GRMZM2G157334 transcript:GRMZM2G157334_T01 description:"omrna"	43	11	34	2	1	233	26.4	7.43	45.416	High	0	147.28	11	9
FALSE	Master Protein	GRMZM2G039238_P01	pep:known chromosome:AGPv3:1:162282138:162287578:1 gene:GRMZM2G039238 transcript:GRMZM2G039238_T01 description:"est|omrna"	43	17	35	14	1	538	58.5	7.74	4.843	High	0	147.08	17	1
FALSE	Master Protein	GRMZM2G051004_P01 pep:known chromosome:AGPv3:4:236626967:236631977:-1 gene:GRMZM2G051004 transcript:GRMZM2G051004_T01 description:"cdna	est protein"	41	14	39	3	1	412	43.3	8.27	3.175	High	0	146.99	14	0
FALSE	Master Protein	GRMZM5G866082_P02	pep:known chromosome:AGPv3:4:193786916:193790368:1 gene:GRMZM5G866082 transcript:GRMZM5G866082_T02 description:"est"	42	13	37	2	1	252	28.6	4.82	11.743	High	0	146.98	13	0
FALSE	Master Protein	GRMZM2G103812_P02 pep:known chromosome:AGPv3:3:161771997:161775440:-1 gene:GRMZM2G103812 transcript:GRMZM2G103812_T02 description:"cdna	est protein"	61	22	34	22	1	493	54.1	6.05	11.798	High	0	146.83	22	0
FALSE	Master Protein	GRMZM2G314647_P01 pep:known chromosome:AGPv3:8:66177484:66187089:-1 gene:GRMZM2G314647 transcript:GRMZM2G314647_T01 description:"cdna	est omrna|protein"	52	26	37	3	1	609	68.8	7.94	3.985	High	0	146.77	26	0
FALSE	Master Protein	GRMZM5G821551_P03	pep:known chromosome:AGPv3:4:193324898:193329134:1 gene:GRMZM5G821551 transcript:GRMZM5G821551_T03 description:"est|mrna"	38	26	38	7	1	692	76.7	6.4	3.437	High	0	146.75	26	19
FALSE	Master Protein	GRMZM2G365160_P01 pep:known chromosome:AGPv3:2:212844778:212848625:-1 gene:GRMZM2G365160 transcript:GRMZM2G365160_T01 description:"cdna	est omrna|protein"	45	19	36	9	1	537	59	8.41	4.275	High	0	146.57	19	6
FALSE	Master Protein	GRMZM2G346455_P06	pep:known chromosome:AGPv3:1:228306620:228318304:-1 gene:GRMZM2G346455 transcript:GRMZM2G346455_T06 description:"protein"	57	18	36	17	1	423	46	7.94	9	High	0	146.54	18	1
FALSE	Master Protein	GRMZM2G127230_P01 pep:known chromosome:AGPv3:4:188917848:188927915:-1 gene:GRMZM2G127230 transcript:GRMZM2G127230_T01 description:"cdna	est omrna|protein"	47	24	40	18	1	545	59.7	9.55	5.31	High	0	146.46	24	0
FALSE	Master Protein	GRMZM2G081114_P01 pep:novel chromosome:AGPv3:1:294892538:294893344:1 gene:GRMZM2G081114 transcript:GRMZM2G081114_T01 description:"cdna	est omrna|protein"	36	8	28	8	1	163	16.7	11.49	58.948	High	0	146.34	8	0
FALSE	Master Protein	GRMZM2G092627_P01	pep:novel chromosome:AGPv3:4:238412080:238476138:1 gene:GRMZM2G092627 transcript:GRMZM2G092627_T01 description:"oprotein"	22	26	37	14	1	1395	154.5	8.03	1.316	High	0	146.24	26	12
FALSE	Master Protein	GRMZM2G022258_P01 pep:novel chromosome:AGPv3:5:741838:752912:1 gene:GRMZM2G022258 transcript:GRMZM2G022258_T01 description:"cdna	est omrna"	31	29	41	9	1	1064	122.3	5.57	3.013	High	0	146.13	29	22
FALSE	Master Protein	GRMZM5G864266_P01	pep:known chromosome:AGPv3:2:234678507:234700316:1 gene:GRMZM5G864266 transcript:GRMZM5G864266_T01 description:"est|mrna"	32	32	40	9	1	1176	137.6	6	2.384	High	0	145.86	32	0
FALSE	Master Protein	GRMZM2G088212_P01 pep:known chromosome:AGPv3:5:63593142:63597617:1 gene:GRMZM2G088212 transcript:GRMZM2G088212_T01 description:"cdna	est omrna|protein"	43	18	36	14	1	492	56.7	7.4	6.43	High	0	145.82	18	0
FALSE	Master Protein	GRMZM2G027219_P01 pep:known chromosome:AGPv3:2:74716207:74718993:1 gene:GRMZM2G027219 transcript:GRMZM2G027219_T01 description:"cdna	est omrna|protein"	41	14	33	14	1	446	50.5	5.44	12.503	High	0	145.73	14	0
FALSE	Master Protein	GRMZM2G081652_P01 pep:known chromosome:AGPv3:3:173515706:173518871:-1 gene:GRMZM2G081652 transcript:GRMZM2G081652_T01 description:"cdna	est protein"	42	18	35	8	1	571	62.3	4.69	8.306	High	0	145.7	18	8
FALSE	Master Protein	GRMZM2G015238_P01	pep:known chromosome:AGPv3:10:18339080:18352768:-1 gene:GRMZM2G015238 transcript:GRMZM2G015238_T01 description:"cdna|est"	35	21	33	21	1	771	86.4	6.38	2.02	High	0	145.64	21	0
FALSE	Master Protein	GRMZM2G122231_P01 pep:known chromosome:AGPv3:5:213103736:213107678:1 gene:GRMZM2G122231 transcript:GRMZM2G122231_T01 description:"cdna	est omrna|protein"	38	25	34	6	1	851	94.3	6.98	2.946	High	0	145.53	25	18
FALSE	Master Protein	GRMZM2G119471_P01 pep:known chromosome:AGPv3:1:5341114:5343424:-1 gene:GRMZM2G119471 transcript:GRMZM2G119471_T01 description:"cdna	est omrna|protein"	45	12	34	12	1	283	30.4	10.15	15.238	High	0	145.19	12	0
FALSE	Master Protein	GRMZM2G088088_P02	pep:known chromosome:AGPv3:8:82956969:82961682:-1 gene:GRMZM2G088088 transcript:GRMZM2G088088_T02 description:"cdna|protein"	37	16	34	2	1	529	58.2	5.36	6.11	High	0	145.17	16	0
FALSE	Master Protein	GRMZM2G027059_P01 pep:known chromosome:AGPv3:1:273003521:273007187:-1 gene:GRMZM2G027059 transcript:GRMZM2G027059_T01 description:"cdna	est omrna|protein"	53	19	33	19	1	462	51.6	6.19	7.532	High	0	145.16	19	0
FALSE	Master Protein	GRMZM2G476933_P01 pep:known chromosome:AGPv3:3:88540265:88546003:-1 gene:GRMZM2G476933 transcript:GRMZM2G476933_T01 description:"cdna	est omrna|protein"	90	12	29	12	1	302	29.3	4.2	19.535	High	0	145.12	12	0
FALSE	Master Protein	GRMZM2G017730_P01	pep:novel chromosome:AGPv3:5:50755927:50785747:1 gene:GRMZM2G017730 transcript:GRMZM2G017730_T01 description:"abinitio"	20	12	34	9	1	582	66.3	8.51	2.981	High	0	144.99	12	0
FALSE	Master Protein	GRMZM2G100225_P01 pep:known chromosome:AGPv3:4:69866238:69868479:1 gene:GRMZM2G100225 transcript:GRMZM2G100225_T01 description:"cdna	est omrna|protein"	66	19	36	3	1	245	28.3	10.13	30.623	High	0	144.77	19	2
FALSE	Master Protein	GRMZM2G080816_P01	pep:known chromosome:AGPv3:8:164165874:164169077:1 gene:GRMZM2G080816 transcript:GRMZM2G080816_T01 description:"omrna|protein"	54	12	28	4	1	354	38.8	8.97	7.031	High	0	144.73	12	8
FALSE	Master Protein	GRMZM2G105539_P01 pep:known chromosome:AGPv3:5:206960888:206965223:-1 gene:GRMZM2G105539 transcript:GRMZM2G105539_T01 description:"cdna	est omrna|protein"	44	13	33	13	1	394	42.9	8.31	11.328	High	0	144.61	13	0
FALSE	Master Protein	GRMZM2G071021_P01 pep:known chromosome:AGPv3:3:221771183:221775333:1 gene:GRMZM2G071021 transcript:GRMZM2G071021_T01 description:"cdna	est omrna|protein"	44	20	36	20	1	502	54	6.39	4.908	High	0	144.41	20	0
FALSE	Master Protein	GRMZM2G090422_P01 pep:known chromosome:AGPv3:1:277805915:277807951:1 gene:GRMZM2G090422 transcript:GRMZM2G090422_T01 description:"cdna	est omrna|protein"	49	12	39	3	1	206	23.6	10.2	45.416	High	0	144.32	12	0
FALSE	Master Protein	GRMZM2G156145_P01 pep:known chromosome:AGPv3:10:140998955:141006046:-1 gene:GRMZM2G156145 transcript:GRMZM2G156145_T01 description:"cdna	est omrna|protein"	30	21	32	3	1	1010	109.6	5.19	2.393	High	0	144.22	21	18
FALSE	Master Protein	GRMZM2G305115_P01	pep:known chromosome:AGPv3:6:157758792:157763864:1 gene:GRMZM2G305115 transcript:GRMZM2G305115_T01 description:"cdna|protein"	39	18	35	16	1	472	55.1	8.18	6.88	High	0	144.12	18	2
FALSE	Master Protein	GRMZM2G082664_P01	pep:known chromosome:AGPv3:1:290337501:290359015:1 gene:GRMZM2G082664 transcript:GRMZM2G082664_T01 description:"est"	44	20	35	20	1	484	52	6.89	5.661	High	0	143.9	20	0
FALSE	Master Protein	GRMZM2G044128_P01 pep:known chromosome:AGPv3:8:5160708:5162795:1 gene:GRMZM2G044128 transcript:GRMZM2G044128_T01 description:"cdna	est omrna|protein"	45	24	32	9	1	583	64.2	9.14	4.908	High	0	143.67	24	15
FALSE	Master Protein	GRMZM5G885392_P01	pep:novel chromosome:AGPv3:7:33239275:33249185:-1 gene:GRMZM5G885392 transcript:GRMZM5G885392_T01 description:"est|mrna"	49	10	35	9	1	329	36.3	5.02	12.111	High	0	143.54	10	1
FALSE	Master Protein	GRMZM2G012479_P01 pep:known chromosome:AGPv3:6:107130613:107135639:1 gene:GRMZM2G012479 transcript:GRMZM2G012479_T01 description:"cdna	est omrna"	29	7	39	7	1	230	25	9.52	6.017	High	0	143.46	7	0
FALSE	Master Protein	GRMZM5G887631_P01	pep:novel chromosome:AGPv3:7:160098895:160108008:-1 gene:GRMZM5G887631 transcript:GRMZM5G887631_T01 description:"est"	32	19	33	16	1	704	78.5	4.96	4.532	High	0	143.42	19	3
FALSE	Master Protein	GRMZM5G826801_P02	pep:known chromosome:AGPv3:8:148046197:148047181:1 gene:GRMZM5G826801 transcript:GRMZM5G826801_T02 description:"cdna|est"	51	9	32	3	1	183	19.1	5.47	42.288	High	0	143.37	9	0
FALSE	Master Protein	GRMZM2G045070_P01 pep:known chromosome:AGPv3:2:37462054:37466996:1 gene:GRMZM2G045070 transcript:GRMZM2G045070_T01 description:"cdna	est omrna|protein"	41	20	34	20	1	665	73.5	5.12	3.556	High	0	143.3	20	0
FALSE	Master Protein	GRMZM2G146677_P01 pep:known chromosome:AGPv3:5:146880878:146886034:-1 gene:GRMZM2G146677 transcript:GRMZM2G146677_T01 description:"cdna	est omrna|protein"	54	18	33	18	1	430	47.7	7.34	8.152	High	0	143.27	18	0
FALSE	Master Protein	GRMZM2G111477_P01 pep:novel chromosome:AGPv3:5:31014041:31015732:-1 gene:GRMZM2G111477 transcript:GRMZM2G111477_T01 description:"abinitio	cdna est|omrna"	69	14	32	5	1	203	21.2	4.77	25.827	High	0	143.25	14	0
FALSE	Master Protein	GRMZM2G180418_P01 pep:known chromosome:AGPv3:5:214171178:214181309:1 gene:GRMZM2G180418 transcript:GRMZM2G180418_T01 description:"abinitio	est omrna|protein"	23	16	35	16	1	764	83.8	8.32	3.739	High	0	143.06	16	0
FALSE	Master Protein	GRMZM2G130064_P01 pep:known chromosome:AGPv3:5:121769704:121777512:1 gene:GRMZM2G130064 transcript:GRMZM2G130064_T01 description:"cdna	est omrna|protein"	36	20	31	7	1	661	71.3	8	2.938	High	0	142.75	20	13
FALSE	Master Protein	GRMZM2G319062_P01 pep:known chromosome:AGPv3:4:28099216:28101623:-1 gene:GRMZM2G319062 transcript:GRMZM2G319062_T01 description:"cdna	est omrna|protein"	32	19	35	18	1	645	70.9	7.3	4.275	High	0	142.72	19	0
FALSE	Master Protein	GRMZM5G877500_P01	pep:known chromosome:AGPv3:9:22689315:22692638:-1 gene:GRMZM5G877500 transcript:GRMZM5G877500_T01 description:"est|mrna"	41	13	33	13	1	390	41.6	5.67	11.328	High	0	142.71	13	0
FALSE	Master Protein	GRMZM2G043212_P01 pep:known chromosome:AGPv3:3:197791606:197794746:1 gene:GRMZM2G043212 transcript:GRMZM2G043212_T01 description:"cdna	est omrna|protein"	53	12	35	12	1	232	26.2	10.36	20.544	High	0	142.69	12	0
FALSE	Master Protein	GRMZM2G176707_P01 pep:known chromosome:AGPv3:8:135485462:135489635:1 gene:GRMZM2G176707 transcript:GRMZM2G176707_T01 description:"cdna	est omrna|protein"	43	13	35	4	1	373	42.4	4.45	17.33	High	0	142.57	13	0
FALSE	Master Protein	GRMZM2G012416_P04	pep:known chromosome:AGPv3:4:204229370:204239289:1 gene:GRMZM2G012416 transcript:GRMZM2G012416_T04 description:"omrna|protein"	51	22	37	7	1	411	47.1	5.45	7.532	High	0	142.55	22	0
FALSE	Master Protein	GRMZM2G105570_P01 pep:known chromosome:AGPv3:2:229565962:229569990:-1 gene:GRMZM2G105570 transcript:GRMZM2G105570_T01 description:"cdna	est protein"	39	21	35	21	1	705	79.1	7.96	3.819	High	0	142.36	21	0
FALSE	Master Protein	GRMZM2G079538_P01	pep:known chromosome:AGPv3:10:110640668:110645891:1 gene:GRMZM2G079538 transcript:GRMZM2G079538_T01 description:"est"	41	15	34	2	1	446	48.8	5.99	12.689	High	0	142.34	15	14
FALSE	Master Protein	AC202185.4_FGP004	pep:known chromosome:AGPv3:1:122169770:122170960:1 gene:AC202185.4_FG004 transcript:AC202185.4_FGT004 description:"est"	56	10	29	10	1	208	22.6	9.29	12.895	High	0	142.12	10	0
FALSE	Master Protein	GRMZM2G010823_P01 pep:known chromosome:AGPv3:1:56748461:56754530:1 gene:GRMZM2G010823 transcript:GRMZM2G010823_T01 description:"cdna	est omrna|protein"	46	15	31	12	1	498	53.6	7.42	3.758	High	0	141.74	15	4
FALSE	Master Protein	GRMZM2G017671_P01 pep:known chromosome:AGPv3:6:47691065:47694869:-1 gene:GRMZM2G017671 transcript:GRMZM2G017671_T01 description:"abinitio	cdna est|omrna"	36	28	36	28	1	892	95	6.39	2.949	High	0	141.53	28	0
FALSE	Master Protein	GRMZM2G063756_P01 pep:known chromosome:AGPv3:4:3112925:3115501:1 gene:GRMZM2G063756 transcript:GRMZM2G063756_T01 description:"cdna	est omrna|protein"	42	18	33	18	1	534	60.4	7.2	6.88	High	0	141.21	18	0
FALSE	Master Protein	GRMZM2G161337_P01 pep:known chromosome:AGPv3:1:38129502:38135226:-1 gene:GRMZM2G161337 transcript:GRMZM2G161337_T01 description:"cdna	est omrna|protein"	39	20	35	19	1	604	66.6	7.27	3.217	High	0	141.2	20	1
FALSE	Master Protein	AC206788.3_FGP015	pep:known chromosome:AGPv3:6:160084242:160087747:1 gene:AC206788.3_FG015 transcript:AC206788.3_FGT015 description:"est|mrna"	50	18	35	18	1	473	51.7	6.04	6.11	High	0	141.19	18	0
FALSE	Master Protein	GRMZM2G120302_P01 pep:known chromosome:AGPv3:9:7579688:7587102:1 gene:GRMZM2G120302 transcript:GRMZM2G120302_T01 description:"cdna	est omrna|protein"	39	22	33	22	1	715	79.4	6.15	4.623	High	0	141.04	22	0
FALSE	Master Protein	GRMZM2G031545_P02 pep:known chromosome:AGPv3:7:165423576:165426172:-1 gene:GRMZM2G031545 transcript:GRMZM2G031545_T02 description:"cdna	est protein"	39	9	34	4	1	251	27.6	4.61	28.286	High	0	141.04	9	6
FALSE	Master Protein	GRMZM2G139300_P01 pep:known chromosome:AGPv3:5:169497597:169502089:1 gene:GRMZM2G139300 transcript:GRMZM2G139300_T01 description:"cdna	est omrna|protein"	28	14	34	13	1	611	67.4	7.8	2.162	High	0	140.98	14	1
FALSE	Master Protein	GRMZM2G039263_P01 pep:known chromosome:AGPv3:4:174931116:174936588:-1 gene:GRMZM2G039263 transcript:GRMZM2G039263_T01 description:"cdna	est omrna|protein"	41	22	36	22	1	545	59.2	6.09	5.078	High	0	140.84	22	0
FALSE	Master Protein	GRMZM2G180335_P01 pep:known chromosome:AGPv3:8:161293943:161303399:1 gene:GRMZM2G180335 transcript:GRMZM2G180335_T01 description:"cdna	est omrna|protein"	37	26	35	8	1	821	90.1	7.08	2.661	High	0	140.52	26	18
FALSE	Master Protein	GRMZM2G171688_P01 pep:known chromosome:AGPv3:2:63621994:63629005:-1 gene:GRMZM2G171688 transcript:GRMZM2G171688_T01 description:"cdna	est omrna|protein"	39	24	37	19	1	679	75.9	6.6	4.142	High	0	140.44	24	0
FALSE	Master Protein	GRMZM2G153181_P01 pep:known chromosome:AGPv3:3:2080250:2084436:1 gene:GRMZM2G153181 transcript:GRMZM2G153181_T01 description:"cdna	est omrna|protein"	37	18	34	18	1	522	61.1	6.4	8.237	High	0	140.43	18	0
FALSE	Master Protein	GRMZM2G436710_P01 pep:known chromosome:AGPv3:5:24235331:24238414:1 gene:GRMZM2G436710 transcript:GRMZM2G436710_T01 description:"cdna	est omrna|protein"	53	11	37	11	1	225	23.6	7.46	20.544	High	0	140.26	11	0
FALSE	Master Protein	GRMZM2G024647_P01 pep:known chromosome:AGPv3:4:128321482:128323867:-1 gene:GRMZM2G024647 transcript:GRMZM2G024647_T01 description:"cdna	est omrna|protein"	54	16	35	1	1	219	24.3	10.14	19.691	High	0	139.86	16	0
FALSE	Master Protein	GRMZM2G008748_P02 pep:known chromosome:AGPv3:4:128289719:128292044:1 gene:GRMZM2G008748 transcript:GRMZM2G008748_T02 description:"cdna	est omrna|protein"	54	16	35	1	1	219	24.2	10.14	19.691	High	0	139.81	16	3
FALSE	Master Protein	GRMZM2G166767_P02 pep:known chromosome:AGPv3:9:139637851:139641270:-1 gene:GRMZM2G166767 transcript:GRMZM2G166767_T02 description:"cdna	omrna protein"	47	27	37	7	1	672	75.8	7.18	3.217	High	0	139.71	27	20
FALSE	Master Protein	GRMZM2G122843_P01 pep:known chromosome:AGPv3:4:165669270:165692637:-1 gene:GRMZM2G122843 transcript:GRMZM2G122843_T01 description:"cdna	est omrna|protein"	32	16	33	16	1	672	73.9	8.98	4.995	High	0	139.71	16	0
FALSE	Master Protein	GRMZM2G041797_P01 pep:novel chromosome:AGPv3:1:195919102:195923409:1 gene:GRMZM2G041797 transcript:GRMZM2G041797_T01 description:"cdna	est omrna|protein"	37	24	36	5	1	692	76.7	6.21	3.054	High	0	139.66	24	0
FALSE	Master Protein	GRMZM2G004528_P03 pep:known chromosome:AGPv3:9:149505656:149510664:1 gene:GRMZM2G004528 transcript:GRMZM2G004528_T03 description:"est	omrna protein"	36	18	37	2	1	510	56	6.07	5.723	High	0	139.63	18	18
FALSE	Master Protein	GRMZM2G420926_P01 pep:known chromosome:AGPv3:9:151739975:151746459:1 gene:GRMZM2G420926 transcript:GRMZM2G420926_T01 description:"cdna	est omrna|protein"	48	12	30	1	1	313	35.6	5.17	24.809	High	0	139.58	12	2
FALSE	Master Protein	GRMZM2G036534_P01 pep:known chromosome:AGPv3:10:11754816:11761391:-1 gene:GRMZM2G036534 transcript:GRMZM2G036534_T01 description:"cdna	est omrna|protein"	45	15	32	6	1	457	47.6	8.1	20.544	High	0	139.51	15	10
FALSE	Master Protein	GRMZM2G143330_P01 pep:known chromosome:AGPv3:7:7511949:7515744:-1 gene:GRMZM2G143330 transcript:GRMZM2G143330_T01 description:"cdna	est omrna|protein"	61	19	35	2	1	326	36.2	6.47	12.503	High	0	139.5	19	0
FALSE	Master Protein	GRMZM2G536644_P01	pep:known chromosome:AGPv3:5:214429474:214439851:-1 gene:GRMZM2G536644 transcript:GRMZM2G536644_T01 description:"mrna"	37	18	35	12	1	488	52.1	8.95	3.977	High	0	139.45	18	6
FALSE	Master Protein	GRMZM2G002825_P01 pep:known chromosome:AGPv3:5:2362606:2365060:-1 gene:GRMZM2G002825 transcript:GRMZM2G002825_T01 description:"cdna	est protein"	53	7	39	1	1	139	15.9	5.67	41.17	High	0	139.12	7	8
FALSE	Master Protein	GRMZM5G804776_P01	pep:known chromosome:AGPv3:Pt:79038:79409:-1 gene:GRMZM5G804776 transcript:GRMZM5G804776_T01 description:"protein"	72	9	35	9	1	123	13.5	9.19	76.426	High	0	139.07	9	0
FALSE	Master Protein	GRMZM2G136453_P01 pep:known chromosome:AGPv3:1:195364024:195371310:-1 gene:GRMZM2G136453 transcript:GRMZM2G136453_T01 description:"cdna	est omrna|protein"	36	20	35	20	1	626	70.2	5.86	6.499	High	0	138.93	20	0
FALSE	Master Protein	GRMZM2G070542_P01	pep:known chromosome:AGPv3:2:236870724:236876652:-1 gene:GRMZM2G070542 transcript:GRMZM2G070542_T01 description:"est|omrna"	41	23	37	23	1	537	59.2	5.83	4.908	High	0	138.85	23	0
FALSE	Master Protein	GRMZM2G056870_P01 pep:known chromosome:AGPv3:1:10989939:10997425:-1 gene:GRMZM2G056870 transcript:GRMZM2G056870_T01 description:"cdna	est omrna|protein"	72	14	33	14	1	237	26	4.82	38.811	High	0	138.83	14	0
FALSE	Master Protein	GRMZM2G149717_P01 pep:known chromosome:AGPv3:6:163625571:163632543:-1 gene:GRMZM2G149717 transcript:GRMZM2G149717_T01 description:"abinitio	cdna est|omrna|protein"	45	26	36	3	1	647	72.8	8.57	3.489	High	0	138.72	26	23
FALSE	Master Protein	GRMZM2G312521_P01 pep:known chromosome:AGPv3:4:174991784:174996304:-1 gene:GRMZM2G312521 transcript:GRMZM2G312521_T01 description:"cdna	est omrna|protein"	29	23	33	3	1	986	108.6	7.05	2.043	High	0	138.66	23	0
FALSE	Master Protein	GRMZM2G091189_P01 pep:known chromosome:AGPv3:4:176529663:176531725:1 gene:GRMZM2G091189 transcript:GRMZM2G091189_T01 description:"cdna	est omrna|protein"	59	13	32	10	1	254	26.4	7.33	11.915	High	0	138.51	13	0
FALSE	Master Protein	GRMZM2G175510_P01 pep:known chromosome:AGPv3:4:229352509:229363491:-1 gene:GRMZM2G175510 transcript:GRMZM2G175510_T01 description:"cdna	est omrna|protein"	39	23	36	2	1	558	60.6	6.58	4.097	High	0	138.45	23	0
FALSE	Master Protein	GRMZM2G122767_P01 pep:known chromosome:AGPv3:4:165703189:165710257:-1 gene:GRMZM2G122767 transcript:GRMZM2G122767_T01 description:"cdna	est omrna|protein"	47	21	32	3	1	535	57.6	7.21	5.043	High	0	137.89	21	0
FALSE	Master Protein	GRMZM2G088565_P01 pep:known chromosome:AGPv3:1:174332071:174336216:1 gene:GRMZM2G088565 transcript:GRMZM2G088565_T01 description:"cdna	est omrna|protein"	44	12	33	5	1	396	42.3	7.02	8.006	High	0	137.83	12	7
FALSE	Master Protein	GRMZM2G146670_P01 pep:known chromosome:AGPv3:7:97642539:97646675:1 gene:GRMZM2G146670 transcript:GRMZM2G146670_T01 description:"cdna	est omrna|protein"	32	8	29	5	1	276	29.6	8.24	6.499	High	0	137.59	8	0
FALSE	Master Protein	GRMZM2G156069_P01 pep:known chromosome:AGPv3:3:218258178:218266244:1 gene:GRMZM2G156069 transcript:GRMZM2G156069_T01 description:"est	omrna protein"	38	20	32	19	1	771	84.2	6.98	2.942	High	0	137.53	20	1
FALSE	Master Protein	GRMZM2G152963_P02	pep:novel chromosome:AGPv3:7:170848922:170860312:1 gene:GRMZM2G152963 transcript:GRMZM2G152963_T02 description:"cdna|est"	25	23	33	10	1	1130	122.1	5.39	2.652	High	0	137.5	23	0
FALSE	Master Protein	GRMZM2G306374_P01	pep:known chromosome:AGPv3:2:10391226:10395283:1 gene:GRMZM2G306374 transcript:GRMZM2G306374_T01 description:"cdna|est"	39	19	33	14	1	595	64.3	7.77	3.252	High	0	137.47	19	5
FALSE	Master Protein	GRMZM2G003501_P01 pep:known chromosome:AGPv3:4:166858871:166860792:1 gene:GRMZM2G003501 transcript:GRMZM2G003501_T01 description:"cdna	est omrna|protein"	47	18	33	17	1	485	53.5	8.72	3.642	High	0	137.46	18	0
FALSE	Master Protein	GRMZM2G133173_P01 pep:known chromosome:AGPv3:3:162868289:162874516:-1 gene:GRMZM2G133173 transcript:GRMZM2G133173_T01 description:"cdna	est omrna|protein"	35	21	35	16	1	711	76.5	6.81	3.479	High	0	137.44	21	5
FALSE	Master Protein	GRMZM2G102000_P01 pep:known chromosome:AGPv3:2:11217394:11225012:1 gene:GRMZM2G102000 transcript:GRMZM2G102000_T01 description:"cdna	est omrna|protein"	29	20	31	3	1	1007	109.3	5.26	2.318	High	0	137.43	20	0
FALSE	Master Protein	GRMZM2G085153_P02 pep:known chromosome:AGPv3:2:166242638:166246591:-1 gene:GRMZM2G085153 transcript:GRMZM2G085153_T02 description:"cdna	est omrna"	36	14	33	14	1	409	45.2	9.1	10.007	High	0	137.33	14	0
FALSE	Master Protein	GRMZM2G029543_P01 pep:known chromosome:AGPv3:1:46139405:46143432:-1 gene:GRMZM2G029543 transcript:GRMZM2G029543_T01 description:"cdna	est omrna|protein"	34	10	27	10	1	368	38.6	5.83	9	High	0	137.3	10	0
FALSE	Master Protein	GRMZM2G341729_P01 pep:known chromosome:AGPv3:6:126329538:126333030:1 gene:GRMZM2G341729 transcript:GRMZM2G341729_T01 description:"cdna	est omrna|protein"	80	9	30	5	1	167	18	5.58	22.101	High	0	137.2	9	4
FALSE	Master Protein	GRMZM2G158887_P01 pep:known chromosome:AGPv3:2:216432494:216435678:1 gene:GRMZM2G158887 transcript:GRMZM2G158887_T01 description:"cdna	est omrna|protein"	73	13	33	12	1	206	23	5.5	20.544	High	0	137.01	13	1
FALSE	Master Protein	GRMZM2G700926_P01	pep:known chromosome:AGPv3:6:49198843:49209831:1 gene:GRMZM2G700926 transcript:GRMZM2G700926_T01 description:"cdna"	40	20	34	20	1	594	67	5.95	2.981	High	0	136.8	20	0
FALSE	Master Protein	GRMZM2G359559_P01 pep:known chromosome:AGPv3:1:187035638:187037628:1 gene:GRMZM2G359559 transcript:GRMZM2G359559_T01 description:"abinitio	cdna est|omrna|protein"	52	8	30	1	1	262	28.7	7.43	12.594	High	0	136.7	8	0
FALSE	Master Protein	GRMZM2G051630_P01 pep:known chromosome:AGPv3:6:131343782:131347669:-1 gene:GRMZM2G051630 transcript:GRMZM2G051630_T01 description:"cdna	est omrna|protein"	51	15	33	4	1	308	33.1	9.7	13.384	High	0	136.69	15	11
FALSE	Master Protein	GRMZM2G355752_P01 pep:known chromosome:AGPv3:2:234220402:234221935:1 gene:GRMZM2G355752 transcript:GRMZM2G355752_T01 description:"cdna	est omrna|protein"	40	5	30	5	1	192	19.2	10.33	7.111	High	0	136.67	5	0
FALSE	Master Protein	GRMZM5G870342_P01	pep:known chromosome:AGPv3:2:10671618:10672229:-1 gene:GRMZM5G870342 transcript:GRMZM5G870342_T01 description:"abinitio"	41	7	33	7	1	203	21.1	10.36	4.179	High	0	136.63	7	0
FALSE	Master Protein	GRMZM2G038126_P01 pep:known chromosome:AGPv3:5:125838970:125854508:1 gene:GRMZM2G038126 transcript:GRMZM2G038126_T01 description:"cdna	est omrna|protein"	36	14	30	13	1	474	52.5	6.33	5.918	High	0	136.49	14	0
FALSE	Master Protein	GRMZM2G418752_P01 pep:known chromosome:AGPv3:7:110942240:110947021:-1 gene:GRMZM2G418752 transcript:GRMZM2G418752_T01 description:"abinitio	est omrna"	41	14	30	14	1	489	54.2	5.03	4.298	High	0	136.38	14	0
FALSE	Master Protein	GRMZM2G052666_P01 pep:known chromosome:AGPv3:1:94495828:94498454:1 gene:GRMZM2G052666 transcript:GRMZM2G052666_T01 description:"cdna	est omrna"	47	12	30	11	1	259	28.4	7.77	16.783	High	0	136.32	12	1
FALSE	Master Protein	GRMZM2G025882_P01 pep:known chromosome:AGPv3:8:87946242:87947663:1 gene:GRMZM2G025882 transcript:GRMZM2G025882_T01 description:"cdna	est omrna|protein"	29	11	33	11	1	290	30.8	8.06	37.312	High	0	136.19	11	0
FALSE	Master Protein	GRMZM2G086906_P01 pep:known chromosome:AGPv3:9:10324545:10325413:-1 gene:GRMZM2G086906 transcript:GRMZM2G086906_T01 description:"cdna	est omrna|protein"	62	11	33	2	1	142	16.4	10.14	236.137	High	0	136.08	11	0
FALSE	Master Protein	GRMZM2G003002_P01 pep:known chromosome:AGPv3:5:4101244:4102794:-1 gene:GRMZM2G003002 transcript:GRMZM2G003002_T01 description:"cdna	est omrna|protein"	40	13	34	5	1	261	26.8	10.7	10.659	High	0	136.02	13	7
FALSE	Master Protein	GRMZM2G009320_P02 pep:known chromosome:AGPv3:7:164993769:164996306:1 gene:GRMZM2G009320 transcript:GRMZM2G009320_T02 description:"est	omrna protein"	61	12	28	8	1	213	22.8	7.81	14.849	High	0	135.86	12	4
FALSE	Master Protein	GRMZM2G028834_P03 pep:known chromosome:AGPv3:2:234575817:234580375:1 gene:GRMZM2G028834 transcript:GRMZM2G028834_T03 description:"est	omrna protein"	61	19	34	2	1	326	36.3	6.47	12.503	High	0	135.77	19	17
FALSE	Master Protein	GRMZM2G179797_P03	pep:known chromosome:AGPv3:6:162746437:162748497:1 gene:GRMZM2G179797 transcript:GRMZM2G179797_T03 description:"est"	39	16	32	11	1	525	57.4	7.52	4.337	High	0	135.75	16	0
FALSE	Master Protein	GRMZM2G034069_P01 pep:known chromosome:AGPv3:9:100444321:100448719:1 gene:GRMZM2G034069 transcript:GRMZM2G034069_T01 description:"cdna	est omrna|protein"	55	14	30	9	1	320	34.9	6.38	7.185	High	0	135.71	14	1
FALSE	Master Protein	GRMZM2G138419_P01 pep:known chromosome:AGPv3:1:151744495:151749633:1 gene:GRMZM2G138419 transcript:GRMZM2G138419_T01 description:"cdna	est omrna|protein"	30	21	32	9	1	872	95.9	4.77	2.754	High	0	135.61	21	12
FALSE	Master Protein	GRMZM2G158034_P01 pep:known chromosome:AGPv3:4:37626157:37628934:1 gene:GRMZM2G158034 transcript:GRMZM2G158034_T01 description:"cdna	est omrna|protein"	62	10	34	2	1	151	17.1	10.54	78.433	High	0	135.38	10	0
FALSE	Master Protein	GRMZM2G107654_P01	pep:known chromosome:AGPv3:7:158175062:158191500:1 gene:GRMZM2G107654 transcript:GRMZM2G107654_T01 description:"est|mrna"	39	16	30	2	1	483	52.8	8.81	6.667	High	0	135.32	16	15
FALSE	Master Protein	GRMZM2G170870_P01 pep:known chromosome:AGPv3:9:128916347:128920210:1 gene:GRMZM2G170870 transcript:GRMZM2G170870_T01 description:"cdna	est omrna|protein"	50	11	34	2	1	226	24.8	9.94	10.45	High	0	135.03	11	0
FALSE	Master Protein	GRMZM5G807639_P03	pep:known chromosome:AGPv3:2:67254519:67272212:-1 gene:GRMZM5G807639 transcript:GRMZM5G807639_T03 description:"est|mrna"	38	14	32	1	1	446	48.7	8.9	8.12	High	0	134.91	14	0
FALSE	Master Protein	GRMZM2G072861_P01 pep:novel chromosome:AGPv3:5:209718873:209720882:1 gene:GRMZM2G072861 transcript:GRMZM2G072861_T01 description:"abinitio	est omrna"	49	14	30	14	1	291	32.4	8.57	13.384	High	0	134.79	14	0
FALSE	Master Protein	GRMZM2G000645_P01	pep:novel chromosome:AGPv3:9:20403490:20413875:-1 gene:GRMZM2G000645 transcript:GRMZM2G000645_T01 description:"est|omrna"	31	25	34	4	1	906	102.1	5.08	2.75	High	0	134.77	25	0
FALSE	Master Protein	GRMZM2G039711_P01 pep:known chromosome:AGPv3:2:27238675:27243966:-1 gene:GRMZM2G039711 transcript:GRMZM2G039711_T01 description:"cdna	est protein"	59	15	29	15	1	335	37.3	6.95	6.499	High	0	134.41	15	0
FALSE	Master Protein	GRMZM2G335287_P01	pep:known chromosome:AGPv3:7:157945392:157975786:-1 gene:GRMZM2G335287 transcript:GRMZM2G335287_T01 description:"mrna"	17	25	35	20	1	1721	191	5.78	0.943	High	0	134.2	25	5
FALSE	Master Protein	GRMZM2G143917_P01 pep:known chromosome:AGPv3:1:206307558:206310775:1 gene:GRMZM2G143917 transcript:GRMZM2G143917_T01 description:"cdna	est protein"	43	16	33	16	1	385	42.7	8.56	8.085	High	0	134.17	16	0
FALSE	Master Protein	GRMZM2G587327_P01	pep:known chromosome:AGPv3:6:160871346:160879920:1 gene:GRMZM2G587327 transcript:GRMZM2G587327_T01 description:"est|mrna"	31	21	33	9	1	741	81.3	6.06	3.725	High	0	134.06	21	13
FALSE	Master Protein	GRMZM2G015285_P01 pep:known chromosome:AGPv3:2:228792133:228793917:1 gene:GRMZM2G015285 transcript:GRMZM2G015285_T01 description:"cdna	est omrna|protein"	46	10	32	10	1	272	29.2	9.51	10.659	High	0	133.87	10	0
FALSE	Master Protein	GRMZM2G018416_P01 pep:known chromosome:AGPv3:4:127878602:127883936:1 gene:GRMZM2G018416 transcript:GRMZM2G018416_T01 description:"cdna	est omrna|protein"	23	14	31	8	1	753	81.6	6.01	3.146	High	0	133.73	14	0
FALSE	Master Protein	GRMZM2G032367_P01	pep:known chromosome:AGPv3:4:53700603:53704302:-1 gene:GRMZM2G032367 transcript:GRMZM2G032367_T01 description:"cdna|omrna"	39	8	32	8	1	306	33.5	6.46	14.849	High	0	133.19	8	0
FALSE	Master Protein	GRMZM2G155242_P01 pep:known chromosome:AGPv3:1:25282951:25287161:1 gene:GRMZM2G155242 transcript:GRMZM2G155242_T01 description:"cdna	est omrna|protein"	37	18	35	2	1	510	56.2	5.94	6.197	High	0	133.16	18	0
FALSE	Master Protein	GRMZM2G441888_P01	pep:known chromosome:AGPv3:1:187416960:187418135:-1 gene:GRMZM2G441888 transcript:GRMZM2G441888_T01 description:"cdna|protein"	41	11	29	11	1	257	27.2	5.66	30.623	High	0	132.99	11	0
FALSE	Master Protein	GRMZM2G077215_P01 pep:known chromosome:AGPv3:2:220766387:220773610:-1 gene:GRMZM2G077215 transcript:GRMZM2G077215_T01 description:"cdna	est omrna|protein"	41	16	30	13	1	476	51.8	7.88	4.736	High	0	132.89	16	3
FALSE	Master Protein	GRMZM2G057942_P01 pep:known chromosome:AGPv3:3:215671743:215676285:1 gene:GRMZM2G057942 transcript:GRMZM2G057942_T01 description:"cdna	est omrna"	61	21	32	21	1	475	52.2	6.71	5.978	High	0	132.74	21	0
FALSE	Master Protein	GRMZM2G053726_P01 pep:known chromosome:AGPv3:3:229472439:229474809:-1 gene:GRMZM2G053726 transcript:GRMZM2G053726_T01 description:"cdna	est omrna|protein"	57	11	30	8	1	292	31.3	8.19	9	High	0	132.71	11	3
FALSE	Master Protein	GRMZM2G049839_P02	pep:known chromosome:AGPv3:4:233658368:233664640:-1 gene:GRMZM2G049839 transcript:GRMZM2G049839_T02 description:"cdna|est"	54	18	31	18	1	408	44.9	5.17	7.254	High	0	132.69	18	0
FALSE	Master Protein	GRMZM2G079777_P01 pep:known chromosome:AGPv3:10:60152246:60163212:1 gene:GRMZM2G079777 transcript:GRMZM2G079777_T01 description:"cdna	est omrna|protein"	62	16	28	2	1	269	29.1	9.8	9	High	0	132.47	16	14
FALSE	Master Protein	GRMZM2G016511_P01 pep:known chromosome:AGPv3:1:16602780:16605847:-1 gene:GRMZM2G016511 transcript:GRMZM2G016511_T01 description:"cdna	est omrna|protein"	64	16	33	4	1	246	27.4	6.55	20.544	High	0	132.31	16	13
FALSE	Master Protein	GRMZM2G039251_P01 pep:known chromosome:AGPv3:2:207695919:207702116:1 gene:GRMZM2G039251 transcript:GRMZM2G039251_T01 description:"cdna	est omrna|protein"	40	10	30	10	1	331	34.2	8	11.915	High	0	132.06	10	0
FALSE	Master Protein	GRMZM2G154664_P02	pep:known chromosome:AGPv3:9:1338691:1347602:1 gene:GRMZM2G154664 transcript:GRMZM2G154664_T02 description:"est"	21	24	35	24	1	1115	121.5	6.81	1.462	High	0	132.02	24	0
FALSE	Master Protein	GRMZM2G129208_P01 pep:known chromosome:AGPv3:2:111832647:111836733:-1 gene:GRMZM2G129208 transcript:GRMZM2G129208_T01 description:"cdna	est omrna|protein"	39	13	31	11	1	382	41	4.94	27.943	High	0	131.85	13	2
FALSE	Master Protein	GRMZM2G127123_P03 pep:known chromosome:AGPv3:1:35582245:35588852:-1 gene:GRMZM2G127123 transcript:GRMZM2G127123_T03 description:"cdna	est omrna"	27	15	28	15	1	852	91.9	6.11	2.639	High	0	131.81	15	0
FALSE	Master Protein	GRMZM2G025531_P01 pep:known chromosome:AGPv3:7:17708098:17719138:-1 gene:GRMZM2G025531 transcript:GRMZM2G025531_T01 description:"est	omrna protein"	37	21	31	21	1	741	81.3	6.06	3.467	High	0	131.81	21	0
FALSE	Master Protein	GRMZM2G093900_P01 pep:known chromosome:AGPv3:4:26919963:26927993:1 gene:GRMZM2G093900 transcript:GRMZM2G093900_T01 description:"abinitio	cdna est|omrna|protein"	41	13	28	9	1	509	55.7	7.12	2.562	High	0	131.8	13	0
FALSE	Master Protein	GRMZM2G172101_P03 pep:known chromosome:AGPv3:2:223544876:223551137:1 gene:GRMZM2G172101 transcript:GRMZM2G172101_T03 description:"cdna	est omrna|protein"	54	25	33	25	1	458	51.8	6.49	6.326	High	0	131.77	25	0
FALSE	Master Protein	GRMZM2G084739_P01 pep:known chromosome:AGPv3:9:27105587:27108026:1 gene:GRMZM2G084739 transcript:GRMZM2G084739_T01 description:"cdna	est protein"	50	11	35	1	1	190	21.5	9.7	16.013	High	0	131.64	11	0
FALSE	Master Protein	GRMZM2G081322_P01 pep:known chromosome:AGPv3:1:61934248:61944736:1 gene:GRMZM2G081322 transcript:GRMZM2G081322_T01 description:"abinitio	cdna est|omrna"	37	28	34	19	1	971	107	6.21	2.103	High	0	131.6	28	3
FALSE	Master Protein	GRMZM6G477257_P01	pep:known chromosome:AGPv3:1:283154011:283156503:1 gene:GRMZM6G477257 transcript:GRMZM6G477257_T01 description:"cdna"	47	10	31	10	1	236	25.7	7.88	28.286	High	0	131.02	10	0
FALSE	Master Protein	GRMZM2G339540_P04	pep:known chromosome:AGPv3:3:224250413:224255475:-1 gene:GRMZM2G339540 transcript:GRMZM2G339540_T04 description:"mrna"	41	19	29	12	1	685	70.2	7.75	3.642	High	0	131	19	7
FALSE	Master Protein	GRMZM2G107696_P01 pep:known chromosome:AGPv3:8:18216431:18229687:1 gene:GRMZM2G107696 transcript:GRMZM2G107696_T01 description:"abinitio	cdna est|omrna|protein"	36	23	31	23	1	835	93.1	5.19	2.907	High	0	130.99	23	0
FALSE	Master Protein	GRMZM2G161295_P01	pep:known chromosome:AGPv3:3:156002614:156005367:-1 gene:GRMZM2G161295 transcript:GRMZM2G161295_T01 description:"est"	25	8	30	8	1	313	34.8	6.19	19.309	High	0	130.94	8	0
FALSE	Master Protein	GRMZM2G031028_P02	pep:known chromosome:AGPv3:2:44056951:44062636:1 gene:GRMZM2G031028 transcript:GRMZM2G031028_T02 description:"mrna"	49	11	29	8	1	318	34.3	5.43	15.238	High	0	130.86	11	3
FALSE	Master Protein	AC209208.3_FGP002	pep:known chromosome:AGPv3:5:193359341:193362190:1 gene:AC209208.3_FG002 transcript:AC209208.3_FGT002 description:"abinitio"	22	7	28	4	1	289	30.8	8.84	11.328	High	0	130.85	7	4
FALSE	Master Protein	GRMZM2G416484_P02 pep:known chromosome:AGPv3:7:148886886:148892565:-1 gene:GRMZM2G416484 transcript:GRMZM2G416484_T02 description:"est	omrna protein"	30	24	33	9	1	1024	116	8.72	1.904	High	0	130.56	24	0
FALSE	Master Protein	GRMZM2G166694_P04 pep:known chromosome:AGPv3:10:90496050:90506761:-1 gene:GRMZM2G166694 transcript:GRMZM2G166694_T04 description:"cdna	est omrna|protein"	32	26	35	3	1	744	86.7	6.8	3.642	High	0	130.44	26	23
FALSE	Master Protein	GRMZM2G427404_P01	pep:known chromosome:AGPv3:5:210016503:210019608:1 gene:GRMZM2G427404 transcript:GRMZM2G427404_T01 description:"est"	43	11	31	6	1	246	27.2	10.8	12.895	High	0	130.43	11	6
FALSE	Master Protein	GRMZM2G553687_P01 pep:novel chromosome:AGPv3:6:112447250:112459445:-1 gene:GRMZM2G553687 transcript:GRMZM2G553687_T01 description:"abinitio	est protein"	17	22	28	22	1	1907	203.7	5.41	0.672	High	0	130.43	22	0
FALSE	Master Protein	GRMZM2G094712_P01 pep:known chromosome:AGPv3:3:195377860:195383470:1 gene:GRMZM2G094712 transcript:GRMZM2G094712_T01 description:"cdna	est omrna|protein"	42	17	30	17	1	459	50.2	8.38	5.723	High	0	130.23	17	0
FALSE	Master Protein	GRMZM2G109244_P01 pep:known chromosome:AGPv3:2:22816325:22817791:-1 gene:GRMZM2G109244 transcript:GRMZM2G109244_T01 description:"cdna	est omrna|protein"	50	11	31	11	1	210	24	6.81	67.129	High	0	129.98	11	0
FALSE	Master Protein	GRMZM2G121221_P01 pep:known chromosome:AGPv3:5:4038837:4040693:1 gene:GRMZM2G121221 transcript:GRMZM2G121221_T01 description:"cdna	est omrna|protein"	34	10	35	4	1	261	26.5	10.78	7.733	High	0	129.95	10	0
FALSE	Master Protein	GRMZM2G017086_P03	pep:known chromosome:AGPv3:3:226711842:226720613:-1 gene:GRMZM2G017086 transcript:GRMZM2G017086_T03 description:"est"	45	17	30	17	1	483	54.2	6.07	11.115	High	0	129.83	17	0
FALSE	Master Protein	GRMZM2G174807_P01 pep:known chromosome:AGPv3:2:18757688:18759694:-1 gene:GRMZM2G174807 transcript:GRMZM2G174807_T01 description:"cdna	est protein"	18	6	27	3	1	288	30.7	8.84	14.849	High	0	129.8	6	0
FALSE	Master Protein	GRMZM2G104613_P01 pep:known chromosome:AGPv3:10:148406957:148410672:1 gene:GRMZM2G104613 transcript:GRMZM2G104613_T01 description:"cdna	est omrna|protein"	49	13	27	5	1	409	43.5	5.55	7.377	High	0	129.6	13	9
FALSE	Master Protein	GRMZM2G165817_P01	pep:known chromosome:AGPv3:4:233562654:233569545:1 gene:GRMZM2G165817 transcript:GRMZM2G165817_T01 description:"est"	60	18	31	8	1	400	44.5	7.46	6.11	High	0	129.53	18	10
FALSE	Master Protein	GRMZM2G016655_P01 pep:known chromosome:AGPv3:8:110569218:110576085:-1 gene:GRMZM2G016655 transcript:GRMZM2G016655_T01 description:"abinitio	cdna est|omrna|protein"	37	27	35	22	1	881	97.4	7.03	2.981	High	0	129.2	27	5
FALSE	Master Protein	GRMZM2G374574_P01 pep:known chromosome:AGPv3:5:66460326:66470597:-1 gene:GRMZM2G374574 transcript:GRMZM2G374574_T01 description:"cdna	est omrna|protein"	19	29	34	25	1	1759	190.6	6.51	1.009	High	0	129.14	29	4
FALSE	Master Protein	GRMZM2G155962_P03	pep:known chromosome:AGPv3:10:110218349:110228163:1 gene:GRMZM2G155962 transcript:GRMZM2G155962_T03 description:"cdna|est"	55	12	31	12	1	294	32.7	5.97	11.743	High	0	129.09	12	0
FALSE	Master Protein	GRMZM2G143568_P01 pep:known chromosome:AGPv3:10:61390270:61396404:1 gene:GRMZM2G143568 transcript:GRMZM2G143568_T01 description:"cdna	est omrna|protein"	41	22	31	22	1	632	68.9	7.49	4.097	High	0	129.04	22	0
FALSE	Master Protein	GRMZM2G088196_P01 pep:novel chromosome:AGPv3:8:136194214:136202905:-1 gene:GRMZM2G088196 transcript:GRMZM2G088196_T01 description:"est	omrna protein"	18	10	27	2	1	608	66.8	9.42	2.981	High	0	128.8	10	0
FALSE	Master Protein	GRMZM2G157317_P03 pep:known chromosome:AGPv3:3:205701055:205702877:1 gene:GRMZM2G157317 transcript:GRMZM2G157317_T03 description:"est	omrna protein"	45	19	32	15	1	473	50.1	4.87	6.88	High	0	128.75	19	4
FALSE	Master Protein	GRMZM2G386714_P01 pep:known chromosome:AGPv3:5:19460235:19471332:1 gene:GRMZM2G386714 transcript:GRMZM2G386714_T01 description:"cdna	est omrna|protein"	30	20	36	5	1	675	75.7	6.46	4.179	High	0	128.66	20	0
FALSE	Master Protein	GRMZM2G096962_P02 pep:known chromosome:AGPv3:5:214426017:214429183:-1 gene:GRMZM2G096962 transcript:GRMZM2G096962_T02 description:"cdna	est omrna|protein"	51	12	31	12	1	194	21.6	9.8	21.758	High	0	128.61	12	0
FALSE	Master Protein	GRMZM2G089308_P01	pep:known chromosome:AGPv3:8:107317423:107322839:1 gene:GRMZM2G089308 transcript:GRMZM2G089308_T01 description:"cdna|est"	60	13	25	13	1	207	21.8	8.19	18.307	High	0	128.59	13	0
FALSE	Master Protein	GRMZM2G138800_P01 pep:known chromosome:AGPv3:3:190379870:190383499:-1 gene:GRMZM2G138800 transcript:GRMZM2G138800_T01 description:"cdna	est omrna|protein"	46	8	26	3	1	203	21.7	6.7	18.953	High	0	128.54	8	6
FALSE	Master Protein	GRMZM2G030606_P01 pep:known chromosome:AGPv3:5:181437480:181439392:-1 gene:GRMZM2G030606 transcript:GRMZM2G030606_T01 description:"cdna	est omrna|protein"	30	10	27	10	1	249	28.2	10.04	5.661	High	0	128.4	10	0
FALSE	Master Protein	GRMZM2G050481_P01 pep:novel chromosome:AGPv3:1:185331193:185332687:1 gene:GRMZM2G050481 transcript:GRMZM2G050481_T01 description:"abinitio	est omrna"	41	9	32	1	1	290	31.3	10.05	6.743	High	0	128.39	9	0
FALSE	Master Protein	GRMZM2G148301_P01	pep:known chromosome:AGPv3:5:185449428:185452044:1 gene:GRMZM2G148301 transcript:GRMZM2G148301_T01 description:"est"	46	20	30	9	1	559	59.8	5.26	4.623	High	0	128.32	20	11
FALSE	Master Protein	GRMZM2G026969_P01	pep:known chromosome:AGPv3:8:164067675:164075959:1 gene:GRMZM2G026969 transcript:GRMZM2G026969_T01 description:"est"	54	17	33	5	1	323	34.6	5.25	8.047	High	0	128.25	17	0
FALSE	Master Protein	GRMZM2G101463_P01 pep:known chromosome:AGPv3:5:209742559:209747717:1 gene:GRMZM2G101463 transcript:GRMZM2G101463_T01 description:"cdna	est omrna|protein"	43	19	30	19	1	498	56.1	6.43	5.404	High	0	128.24	19	0
FALSE	Master Protein	GRMZM2G079256_P01	pep:known chromosome:AGPv3:7:74265493:74285785:-1 gene:GRMZM2G079256 transcript:GRMZM2G079256_T01 description:"cdna"	37	10	30	7	1	308	32.4	9.36	10.365	High	0	128.1	10	0
FALSE	Master Protein	GRMZM2G095593_P01 pep:known chromosome:AGPv3:2:218783362:218786574:-1 gene:GRMZM2G095593 transcript:GRMZM2G095593_T01 description:"cdna	est omrna|protein"	66	17	33	1	1	289	32.3	5.99	22.357	High	0	128.02	17	0
FALSE	Master Protein	GRMZM2G078118_P02 pep:known chromosome:AGPv3:5:215538245:215541496:1 gene:GRMZM2G078118 transcript:GRMZM2G078118_T02 description:"cdna	est omrna|protein"	30	10	32	10	1	307	32.9	9.11	20.544	High	0	127.98	10	0
FALSE	Master Protein	GRMZM2G060702_P02 pep:known chromosome:AGPv3:1:293240399:293243048:1 gene:GRMZM2G060702 transcript:GRMZM2G060702_T02 description:"cdna	est omrna|protein"	53	7	36	1	1	139	15.9	5.67	41.17	High	0	127.98	7	0
FALSE	Master Protein	GRMZM2G079759_P01 pep:known chromosome:AGPv3:10:76419421:76422849:-1 gene:GRMZM2G079759 transcript:GRMZM2G079759_T01 description:"cdna	est omrna|protein"	35	8	29	8	1	346	37.2	9.94	4.012	High	0	127.96	8	0
FALSE	Master Protein	GRMZM2G086788_P01 pep:known chromosome:AGPv3:1:61293958:61297489:-1 gene:GRMZM2G086788 transcript:GRMZM2G086788_T01 description:"cdna	est omrna|protein"	47	11	33	2	1	226	24.9	9.99	7.799	High	0	127.91	11	11
FALSE	Master Protein	GRMZM2G021635_P03	pep:known chromosome:AGPv3:2:6057135:6059668:-1 gene:GRMZM2G021635 transcript:GRMZM2G021635_T03 description:"est|protein"	54	15	27	1	1	269	29.1	9.8	7.913	High	0	127.7	15	0
FALSE	Master Protein	GRMZM2G423137_P01 pep:known chromosome:AGPv3:4:238899574:238901118:-1 gene:GRMZM2G423137 transcript:GRMZM2G423137_T01 description:"cdna	est omrna|protein"	20	5	23	5	1	289	30.2	9.99	3.394	High	0	127.55	5	0
FALSE	Master Protein	GRMZM2G157156_P02	pep:known chromosome:AGPv3:8:71493785:71503078:-1 gene:GRMZM2G157156 transcript:GRMZM2G157156_T02 description:"est"	41	15	28	5	1	430	44.9	7.12	10.159	High	0	127.4	15	0
FALSE	Master Protein	GRMZM2G052100_P01 pep:known chromosome:AGPv3:10:116077391:116078438:-1 gene:GRMZM2G052100 transcript:GRMZM2G052100_T01 description:"cdna	est omrna|protein"	51	6	22	6	1	104	11.8	7.18	157.489	High	0	127.38	6	0
FALSE	Master Protein	GRMZM5G803490_P01	pep:known chromosome:AGPv3:2:24987243:24990796:-1 gene:GRMZM5G803490 transcript:GRMZM5G803490_T01 description:"est"	43	11	27	3	1	407	43	5.83	6.586	High	0	127.31	11	0
FALSE	Master Protein	GRMZM2G023906_P01 pep:known chromosome:AGPv3:1:182102172:182120905:1 gene:GRMZM2G023906 transcript:GRMZM2G023906_T01 description:"abinitio	cdna est|omrna|protein"	27	22	31	22	1	1059	117.2	6.67	2.162	High	0	127.18	22	0
FALSE	Master Protein	GRMZM2G445602_P01 pep:known chromosome:AGPv3:1:16821856:16825679:1 gene:GRMZM2G445602 transcript:GRMZM2G445602_T01 description:"cdna	est omrna|protein"	39	18	30	15	1	543	60.3	9.01	5.629	High	0	127.16	18	3
FALSE	Master Protein	GRMZM2G093643_P01 pep:known chromosome:AGPv3:10:148008806:148020242:-1 gene:GRMZM2G093643 transcript:GRMZM2G093643_T01 description:"cdna	est omrna|protein"	22	18	32	14	1	1032	110.8	5.47	1.913	High	0	127.09	18	0
FALSE	Master Protein	GRMZM2G158595_P01 pep:known chromosome:AGPv3:9:45486736:45493452:-1 gene:GRMZM2G158595 transcript:GRMZM2G158595_T01 description:"cdna	est omrna|protein"	39	23	30	23	1	630	69.8	6.6	4.367	High	0	126.91	23	0
FALSE	Master Protein	GRMZM2G077632_P01 pep:known chromosome:AGPv3:2:216580868:216585087:1 gene:GRMZM2G077632 transcript:GRMZM2G077632_T01 description:"cdna	est omrna|protein"	38	21	28	21	1	748	81.6	4.97	3.739	High	0	126.84	21	0
FALSE	Master Protein	GRMZM2G180578_P01 pep:known chromosome:AGPv3:4:217555204:217562058:-1 gene:GRMZM2G180578 transcript:GRMZM2G180578_T01 description:"cdna	est omrna|protein"	53	24	32	5	1	491	55.6	8.35	6.128	High	0	126.8	24	19
FALSE	Master Protein	GRMZM2G074386_P01 pep:known chromosome:AGPv3:7:136605465:136608890:1 gene:GRMZM2G074386 transcript:GRMZM2G074386_T01 description:"cdna	est omrna|protein"	73	12	27	1	1	221	24.3	6.89	24.119	High	0	126.66	12	13
FALSE	Master Protein	GRMZM2G405459_P01 pep:known chromosome:AGPv3:5:145563185:145565626:-1 gene:GRMZM2G405459 transcript:GRMZM2G405459_T01 description:"cdna	est omrna|protein"	55	10	24	10	1	321	33.2	8.07	9	High	0	126.64	10	0
FALSE	Master Protein	GRMZM2G117900_P01 pep:known chromosome:AGPv3:2:206433422:206437893:1 gene:GRMZM2G117900 transcript:GRMZM2G117900_T01 description:"cdna	est protein"	38	15	28	1	1	464	50.7	8.62	7.254	High	0	126.42	15	0
FALSE	Master Protein	GRMZM2G058702_P01 pep:known chromosome:AGPv3:1:214769982:214774272:1 gene:GRMZM2G058702 transcript:GRMZM2G058702_T01 description:"cdna	est omrna|protein"	34	14	31	6	1	471	48.9	8.41	8.085	High	0	126.23	14	8
FALSE	Master Protein	GRMZM2G159643_P01 pep:known chromosome:AGPv3:8:171405173:171408840:-1 gene:GRMZM2G159643 transcript:GRMZM2G159643_T01 description:"cdna	est omrna|protein"	49	8	27	3	1	203	21.5	6.38	24.119	High	0	125.88	8	0
FALSE	Master Protein	GRMZM2G110201_P01 pep:known chromosome:AGPv3:5:31151419:31155713:-1 gene:GRMZM2G110201 transcript:GRMZM2G110201_T01 description:"cdna	est omrna|protein"	47	18	29	18	1	461	48.1	8.41	9.965	High	0	125.7	18	0
FALSE	Master Protein	GRMZM2G385931_P02 pep:known chromosome:AGPv3:1:51283064:51287439:1 gene:GRMZM2G385931 transcript:GRMZM2G385931_T02 description:"est	omrna protein"	32	21	33	5	1	721	81.7	7.33	2.981	High	0	125.52	21	16
FALSE	Master Protein	GRMZM2G057000_P03	pep:known chromosome:AGPv3:5:65139868:65142541:1 gene:GRMZM2G057000 transcript:GRMZM2G057000_T03 description:"cdna|protein"	36	15	30	15	1	562	65.1	8.27	3.299	High	0	125.32	15	0
FALSE	Master Protein	GRMZM2G163749_P01 pep:known chromosome:AGPv3:5:212075848:212078728:-1 gene:GRMZM2G163749 transcript:GRMZM2G163749_T01 description:"cdna	est omrna|protein"	22	10	23	10	1	783	80.7	5.72	3.125	High	0	125.25	10	0
FALSE	Master Protein	GRMZM2G165357_P01 pep:known chromosome:AGPv3:9:139662178:139666536:-1 gene:GRMZM2G165357 transcript:GRMZM2G165357_T01 description:"cdna	est omrna|protein"	64	19	29	4	1	350	39.3	7.94	12.503	High	0	125.18	19	16
FALSE	Master Protein	GRMZM2G077541_P01	pep:known chromosome:AGPv3:2:2330974:2334509:1 gene:GRMZM2G077541 transcript:GRMZM2G077541_T01 description:"mrna"	40	12	26	12	1	387	41.2	5.64	10.288	High	0	125.01	12	0
FALSE	Master Protein	GRMZM2G099045_P01 pep:known chromosome:AGPv3:8:169340592:169344491:1 gene:GRMZM2G099045 transcript:GRMZM2G099045_T01 description:"cdna	est omrna|protein"	39	18	31	18	1	540	59.3	6.24	7.62	High	0	124.85	18	0
FALSE	Master Protein	GRMZM2G043198_P01	pep:known chromosome:AGPv3:1:195433120:195449499:1 gene:GRMZM2G043198 transcript:GRMZM2G043198_T01 description:"cdna|est"	25	8	30	2	1	373	39.8	5.76	6.627	High	0	124.75	8	0
FALSE	Master Protein	GRMZM2G181505_P01 pep:known chromosome:AGPv3:5:205395331:205401232:-1 gene:GRMZM2G181505 transcript:GRMZM2G181505_T01 description:"cdna	est omrna|protein"	48	18	32	18	1	415	45.6	6.46	6.743	High	0	124.66	18	0
FALSE	Master Protein	GRMZM2G407044_P01	pep:known chromosome:AGPv3:4:135184888:135190339:-1 gene:GRMZM2G407044 transcript:GRMZM2G407044_T01 description:"cdna|est"	29	13	29	5	1	483	52.3	8.73	2.511	High	0	124.44	13	5
FALSE	Master Protein	GRMZM2G178807_P01 pep:known chromosome:AGPv3:10:68431320:68434189:1 gene:GRMZM2G178807 transcript:GRMZM2G178807_T01 description:"cdna	est omrna|protein"	61	18	32	2	1	247	28.5	10.08	19.691	High	0	124.39	18	0
FALSE	Master Protein	GRMZM2G143354_P01	pep:known chromosome:AGPv3:3:137371268:137378912:1 gene:GRMZM2G143354 transcript:GRMZM2G143354_T01 description:"est|mrna"	33	15	31	2	1	523	57.5	5.73	5.404	High	0	124.28	15	14
FALSE	Master Protein	GRMZM6G617209_P01	pep:known chromosome:AGPv3:4:1252638:1254044:1 gene:GRMZM6G617209 transcript:GRMZM6G617209_T01 description:"cdna cdna"	35	13	29	12	1	374	41.3	6.62	6.305	High	0	124.26	13	1
FALSE	Master Protein	GRMZM2G025387_P01 pep:known chromosome:AGPv3:8:144618028:144622902:1 gene:GRMZM2G025387 transcript:GRMZM2G025387_T01 description:"abinitio	cdna est|omrna"	33	14	28	2	1	530	59.9	6.34	3.101	High	0	124.25	14	1
FALSE	Master Protein	GRMZM2G099367_P01	pep:known chromosome:AGPv3:1:221423337:221455712:-1 gene:GRMZM2G099367 transcript:GRMZM2G099367_T01 description:"est"	48	13	32	13	1	261	28.2	8.88	11.915	High	0	124.23	13	0
FALSE	Master Protein	GRMZM2G081175_P01 pep:known chromosome:AGPv3:9:143586090:143590243:1 gene:GRMZM2G081175 transcript:GRMZM2G081175_T01 description:"cdna	est omrna|protein"	43	18	32	18	1	487	52.4	7.05	9.89	High	0	124.11	18	0
FALSE	Master Protein	GRMZM2G422651_P01 pep:known chromosome:AGPv3:3:211227556:211229856:-1 gene:GRMZM2G422651 transcript:GRMZM2G422651_T01 description:"cdna	est omrna|protein"	41	18	29	15	1	580	64.8	5.71	3.87	High	0	123.97	18	3
FALSE	Master Protein	GRMZM5G856653_P01	pep:known chromosome:AGPv3:3:199340491:199346889:1 gene:GRMZM5G856653 transcript:GRMZM5G856653_T01 description:"cdna|est"	39	16	28	15	1	506	55	6.34	5.723	High	0	123.93	16	1
FALSE	Master Protein	GRMZM2G166089_P05 pep:known chromosome:AGPv3:8:126398561:126406690:1 gene:GRMZM2G166089 transcript:GRMZM2G166089_T05 description:"cdna	omrna protein"	29	24	33	1	1	744	86.7	6.87	3.217	High	0	123.9	24	0
FALSE	Master Protein	GRMZM2G456086_P01	pep:known chromosome:AGPv3:7:9373905:9377657:-1 gene:GRMZM2G456086 transcript:GRMZM2G456086_T01 description:"cdna|est"	39	10	28	10	1	274	28.8	5.74	7.66	High	0	123.73	10	0
FALSE	Master Protein	GRMZM5G817037_P02	pep:known chromosome:AGPv3:2:192656070:192660250:-1 gene:GRMZM5G817037 transcript:GRMZM5G817037_T02 description:"mrna"	70	11	26	1	1	221	24.3	6.34	20.544	High	0	123.55	11	0
FALSE	Master Protein	GRMZM2G095333_P01 pep:known chromosome:AGPv3:9:109326184:109327626:-1 gene:GRMZM2G095333 transcript:GRMZM2G095333_T01 description:"cdna	est omrna|protein"	42	7	29	7	1	213	21.9	9.41	6.197	High	0	123.54	7	0
FALSE	Master Protein	GRMZM2G430600_P02 pep:known chromosome:AGPv3:7:174326466:174330726:-1 gene:GRMZM2G430600 transcript:GRMZM2G430600_T02 description:"cdna	est omrna|protein"	37	16	30	7	1	396	44.5	4.7	4.505	High	0	123.44	16	9
FALSE	Master Protein	GRMZM2G172410_P01 pep:known chromosome:AGPv3:1:12975288:12984545:1 gene:GRMZM2G172410 transcript:GRMZM2G172410_T01 description:"abinitio	est protein"	28	21	31	21	1	876	98.1	8.84	1.698	High	0	123.41	21	0
FALSE	Master Protein	GRMZM2G379002_P01	pep:known chromosome:AGPv3:5:215549489:215554056:1 gene:GRMZM2G379002 transcript:GRMZM2G379002_T01 description:"est"	68	14	28	14	1	296	31.3	5.41	13.678	High	0	123.37	14	0
FALSE	Master Protein	GRMZM2G352415_P03	pep:known chromosome:AGPv3:1:297095586:297098393:-1 gene:GRMZM2G352415 transcript:GRMZM2G352415_T03 description:"est|protein"	55	17	29	17	1	319	35.3	5.11	14.849	High	0	123.36	17	0
FALSE	Master Protein	GRMZM2G024823_P02 pep:known chromosome:AGPv3:1:99180327:99184416:1 gene:GRMZM2G024823 transcript:GRMZM2G024823_T02 description:"cdna	est omrna|protein"	55	13	27	13	1	296	30.1	9.51	10.22	High	0	123.32	13	0
FALSE	Master Protein	GRMZM5G852185_P04	pep:known chromosome:AGPv3:6:4895653:4897562:-1 gene:GRMZM5G852185 transcript:GRMZM5G852185_T04 description:"est"	62	10	32	2	1	151	17.2	10.54	78.433	High	0	123.25	10	9
FALSE	Master Protein	GRMZM2G145088_P01 pep:known chromosome:AGPv3:5:64135849:64145035:1 gene:GRMZM2G145088 transcript:GRMZM2G145088_T01 description:"cdna	est omrna|protein"	28	24	29	24	1	1205	130.7	5.66	1.444	High	0	123.2	24	0
FALSE	Master Protein	GRMZM2G119761_P01 pep:known chromosome:AGPv3:1:206554966:206558522:1 gene:GRMZM2G119761 transcript:GRMZM2G119761_T01 description:"cdna	est omrna|protein"	44	21	31	2	1	492	55.7	8.57	5.225	High	0	123.14	21	0
FALSE	Master Protein	GRMZM2G044137_P01 pep:known chromosome:AGPv3:6:155586898:155589769:1 gene:GRMZM2G044137 transcript:GRMZM2G044137_T01 description:"cdna	est omrna|protein"	71	9	29	6	1	112	12.3	9.55	718.686	High	0	123.03	9	5
FALSE	Master Protein	GRMZM2G110714_P01 pep:known chromosome:AGPv3:8:173256405:173268974:1 gene:GRMZM2G110714 transcript:GRMZM2G110714_T01 description:"cdna	est omrna|protein"	22	20	38	3	1	966	110.1	6.19	1.106	High	0	122.99	20	0
FALSE	Master Protein	GRMZM2G029573_P03 pep:known chromosome:AGPv3:4:160486837:160492978:1 gene:GRMZM2G029573 transcript:GRMZM2G029573_T03 description:"cdna	est protein"	43	15	28	8	1	488	52.9	6.86	8.047	High	0	122.9	15	7
FALSE	Master Protein	GRMZM2G081268_P01	pep:known chromosome:AGPv3:5:132544170:132546408:1 gene:GRMZM2G081268 transcript:GRMZM2G081268_T01 description:"cdna|est"	36	10	33	8	1	340	37.3	6.11	4.505	High	0	122.81	10	0
FALSE	Master Protein	GRMZM2G098423_P01	pep:known chromosome:AGPv3:9:108369675:108372882:1 gene:GRMZM2G098423 transcript:GRMZM2G098423_T01 description:"cdna|est"	33	15	27	14	1	589	61.7	6.62	3.101	High	0	122.78	15	0
FALSE	Master Protein	GRMZM2G020446_P01 pep:known chromosome:AGPv3:10:5722736:5732491:-1 gene:GRMZM2G020446 transcript:GRMZM2G020446_T01 description:"cdna	est omrna|protein"	37	14	29	6	1	488	53.3	8.06	2.857	High	0	122.72	14	0
FALSE	Master Protein	GRMZM2G117707_P02	pep:known chromosome:AGPv3:7:166501966:166506528:-1 gene:GRMZM2G117707 transcript:GRMZM2G117707_T02 description:"est|mrna"	35	16	30	6	1	538	59	8.24	2.472	High	0	122.42	16	0
FALSE	Master Protein	GRMZM2G179521_P01	pep:known chromosome:AGPv3:1:72102454:72121802:1 gene:GRMZM2G179521 transcript:GRMZM2G179521_T01 description:"mrna"	33	21	35	14	1	605	68.3	8.82	3.467	High	0	122.29	21	7
FALSE	Master Protein	GRMZM2G382077_P01	pep:known chromosome:AGPv3:1:242209875:242228024:-1 gene:GRMZM2G382077 transcript:GRMZM2G382077_T01 description:"est"	39	10	25	1	1	315	35.8	5.19	11.743	High	0	122.25	10	0
FALSE	Master Protein	GRMZM2G162755_P01 pep:known chromosome:AGPv3:6:120058984:120060863:-1 gene:GRMZM2G162755 transcript:GRMZM2G162755_T01 description:"cdna	est omrna|protein"	33	13	27	12	1	482	52	6.23	4.38	High	0	122.25	13	1
FALSE	Master Protein	GRMZM2G044800_P01 pep:known chromosome:AGPv3:2:10483475:10486040:-1 gene:GRMZM2G044800 transcript:GRMZM2G044800_T01 description:"cdna	est omrna|protein"	53	10	31	10	1	159	17.7	10.58	62.096	High	0	122.15	10	0
FALSE	Master Protein	GRMZM2G478664_P01	pep:known chromosome:AGPv3:5:211947182:211961947:1 gene:GRMZM2G478664 transcript:GRMZM2G478664_T01 description:"est"	38	17	29	17	1	537	61	6.49	4.233	High	0	122.15	17	0
FALSE	Master Protein	GRMZM2G137236_P01	pep:known chromosome:AGPv3:1:3002518:3020918:1 gene:GRMZM2G137236 transcript:GRMZM2G137236_T01 description:"est"	24	22	32	18	1	1107	123.3	5.76	1.596	High	0	122.09	22	4
FALSE	Master Protein	GRMZM2G089147_P02	pep:known chromosome:AGPv3:1:103831977:103834692:1 gene:GRMZM2G089147 transcript:GRMZM2G089147_T02 description:"est|mrna"	39	14	30	14	1	384	41.5	5.53	10.007	High	0	121.94	14	0
FALSE	Master Protein	GRMZM2G145496_P01 pep:known chromosome:AGPv3:8:160627700:160629731:-1 gene:GRMZM2G145496 transcript:GRMZM2G145496_T01 description:"cdna	est protein"	43	8	30	8	1	190	20.6	10.07	9	High	0	121.85	8	0
FALSE	Master Protein	GRMZM2G146246_P02 pep:known chromosome:AGPv3:3:155015757:155017338:-1 gene:GRMZM2G146246 transcript:GRMZM2G146246_T02 description:"cdna	est omrna|protein"	44	8	31	8	1	221	23.9	6.42	13.678	High	0	121.81	8	0
FALSE	Master Protein	GRMZM2G164714_P02	pep:known chromosome:AGPv3:10:132029047:132032448:-1 gene:GRMZM2G164714 transcript:GRMZM2G164714_T02 description:"cdna|est"	48	17	30	16	1	490	52.4	7.34	6.814	High	0	121.74	17	1
FALSE	Master Protein	GRMZM2G158835_P01 pep:known chromosome:AGPv3:7:167862249:167864329:1 gene:GRMZM2G158835 transcript:GRMZM2G158835_T01 description:"cdna	est omrna|protein"	24	4	25	3	1	267	28.1	4.94	3.642	High	0	121.64	4	0
FALSE	Master Protein	GRMZM2G069676_P03	pep:known chromosome:AGPv3:7:41746480:41810114:-1 gene:GRMZM2G069676 transcript:GRMZM2G069676_T03 description:"est|mrna"	37	20	30	20	1	615	66.6	6.64	3.354	High	0	121.42	20	0
FALSE	Master Protein	GRMZM2G332838_P01 pep:known chromosome:AGPv3:2:183946006:183947706:1 gene:GRMZM2G332838 transcript:GRMZM2G332838_T01 description:"abinitio	cdna est|omrna|protein"	21	6	32	6	1	248	27.4	11.68	9	High	0	121.42	6	0
FALSE	Master Protein	GRMZM2G051129_P02 pep:known chromosome:AGPv3:7:175876893:175880633:1 gene:GRMZM2G051129 transcript:GRMZM2G051129_T02 description:"cdna	est omrna|protein"	30	11	30	2	1	438	47.2	7.69	4.109	High	0	121.29	11	0
FALSE	Master Protein	GRMZM2G399183_P01 pep:known chromosome:AGPv3:10:15804790:15806176:1 gene:GRMZM2G399183 transcript:GRMZM2G399183_T01 description:"cdna	est protein"	56	5	27	5	1	164	17.1	5.3	14.199	High	0	121.19	5	0
FALSE	Master Protein	GRMZM2G031572_P01 pep:known chromosome:AGPv3:1:224300812:224309299:-1 gene:GRMZM2G031572 transcript:GRMZM2G031572_T01 description:"cdna	est omrna|protein"	38	15	29	13	1	509	56.1	6.47	4.843	High	0	120.95	15	2
FALSE	Master Protein	GRMZM2G129155_P01 pep:known chromosome:AGPv3:3:160440109:160451134:1 gene:GRMZM2G129155 transcript:GRMZM2G129155_T01 description:"est	omrna protein"	29	22	30	4	1	817	89.9	7.08	2.03	High	0	120.94	22	0
FALSE	Master Protein	GRMZM2G033555_P01	pep:known chromosome:AGPv3:9:100416964:100423765:1 gene:GRMZM2G033555 transcript:GRMZM2G033555_T01 description:"cdna|est"	46	15	31	11	1	346	38.4	5.52	13.125	High	0	120.88	15	4
FALSE	Master Protein	GRMZM2G063617_P01 pep:known chromosome:AGPv3:7:172752656:172754684:1 gene:GRMZM2G063617 transcript:GRMZM2G063617_T01 description:"cdna	est omrna|protein"	59	8	30	6	1	130	14.5	9.55	34.938	High	0	120.8	8	2
FALSE	Master Protein	GRMZM2G097226_P02 pep:known chromosome:AGPv3:2:193226331:193232761:1 gene:GRMZM2G097226 transcript:GRMZM2G097226_T02 description:"cdna	est omrna"	27	10	29	4	1	397	42.5	6.06	9	High	0	120.8	10	9
FALSE	Master Protein	GRMZM2G116135_P01 pep:known chromosome:AGPv3:3:220590843:220593572:1 gene:GRMZM2G116135 transcript:GRMZM2G116135_T01 description:"cdna	est omrna|protein"	39	9	33	1	1	207	24.1	11.44	128.155	High	0	120.65	9	2
FALSE	Master Protein	GRMZM2G167031_P01 pep:known chromosome:AGPv3:1:299824128:299834549:-1 gene:GRMZM2G167031 transcript:GRMZM2G167031_T01 description:"cdna	est omrna|protein"	27	22	34	2	1	913	104.9	5.62	2.942	High	0	120.61	22	0
FALSE	Master Protein	GRMZM2G176820_P01 pep:known chromosome:AGPv3:1:4751568:4754549:-1 gene:GRMZM2G176820 transcript:GRMZM2G176820_T01 description:"cdna	est omrna|protein"	45	9	29	9	1	217	22.7	10.1	7.66	High	0	120.37	9	0
FALSE	Master Protein	GRMZM5G869196_P01	pep:known chromosome:AGPv3:7:144235285:144236661:1 gene:GRMZM5G869196 transcript:GRMZM5G869196_T01 description:"est"	47	12	30	12	1	300	33.1	6.95	3.489	High	0	120.37	12	0
FALSE	Master Protein	GRMZM2G136283_P01 pep:known chromosome:AGPv3:10:148527506:148530904:1 gene:GRMZM2G136283 transcript:GRMZM2G136283_T01 description:"est	omrna protein"	41	17	26	17	1	545	59.4	6.57	5.105	High	0	120.34	17	0
FALSE	Master Protein	GRMZM2G096596_P01 pep:known chromosome:AGPv3:5:9911132:9919098:1 gene:GRMZM2G096596 transcript:GRMZM2G096596_T01 description:"cdna	est omrna"	42	19	29	4	1	488	51.9	7.91	3.85	High	0	120.34	19	0
FALSE	Master Protein	GRMZM2G115646_P01 pep:known chromosome:AGPv3:1:235704589:235728305:-1 gene:GRMZM2G115646 transcript:GRMZM2G115646_T01 description:"cdna	est omrna|protein"	30	23	32	22	1	842	93.2	6.57	2.728	High	0	120.2	23	1
FALSE	Master Protein	GRMZM2G039588_P03	pep:known chromosome:AGPv3:2:4179876:4184562:-1 gene:GRMZM2G039588 transcript:GRMZM2G039588_T03 description:"cdna"	62	18	29	16	1	342	38.2	5.43	11.328	High	0	120.09	18	2
FALSE	Master Protein	GRMZM2G177895_P01 pep:known chromosome:AGPv3:3:230599139:230600906:-1 gene:GRMZM2G177895 transcript:GRMZM2G177895_T01 description:"cdna	est omrna"	56	10	26	10	1	212	22.5	7.44	20.544	High	0	119.99	10	0
FALSE	Master Protein	GRMZM2G409133_P01 pep:known chromosome:AGPv3:1:243500245:243505085:-1 gene:GRMZM2G409133 transcript:GRMZM2G409133_T01 description:"cdna	est omrna|protein"	43	11	26	11	1	369	39.6	6.25	4.623	High	0	119.99	11	0
FALSE	Master Protein	GRMZM2G008623_P01 pep:known chromosome:AGPv3:2:214508389:214514872:1 gene:GRMZM2G008623 transcript:GRMZM2G008623_T01 description:"cdna	est omrna|protein"	53	15	30	0	1	249	27.3	6.35	15.681	High	0	119.73	15	15
FALSE	Master Protein	GRMZM2G014376_P03	pep:known chromosome:AGPv3:10:25983459:25988271:-1 gene:GRMZM2G014376 transcript:GRMZM2G014376_T03 description:"cdna|est"	46	18	27	18	1	534	57.2	6.09	4.52	High	0	119.67	18	0
FALSE	Master Protein	GRMZM2G053999_P01 pep:known chromosome:AGPv3:7:165787766:165790666:-1 gene:GRMZM2G053999 transcript:GRMZM2G053999_T01 description:"cdna	est omrna|protein"	43	11	28	8	1	329	36.3	5.26	13.678	High	0	119.57	11	1
FALSE	Master Protein	GRMZM2G029262_P04 pep:known chromosome:AGPv3:1:172141274:172147256:-1 gene:GRMZM2G029262 transcript:GRMZM2G029262_T04 description:"cdna	omrna protein"	52	16	29	14	1	407	43.2	7.09	5.629	High	0	119.55	16	2
FALSE	Master Protein	GRMZM2G166281_P01 pep:known chromosome:AGPv3:2:5275102:5279397:1 gene:GRMZM2G166281 transcript:GRMZM2G166281_T01 description:"cdna	est omrna|protein"	23	8	28	2	1	468	50.5	5.24	2.36	High	0	119.48	8	0
FALSE	Master Protein	GRMZM2G032351_P01 pep:known chromosome:AGPv3:1:220359597:220392126:-1 gene:GRMZM2G032351 transcript:GRMZM2G032351_T01 description:"cdna	est protein"	27	20	30	19	1	905	101.3	7.58	2.241	High	0	119.43	20	1
FALSE	Master Protein	GRMZM2G042089_P01 pep:known chromosome:AGPv3:10:29881928:29893617:1 gene:GRMZM2G042089 transcript:GRMZM2G042089_T01 description:"abinitio	cdna est|omrna"	34	15	30	2	1	516	56.9	5.63	4.946	High	0	119.33	15	0
FALSE	Master Protein	GRMZM2G130398_P02	pep:known chromosome:AGPv3:7:169575027:169580016:1 gene:GRMZM2G130398 transcript:GRMZM2G130398_T02 description:"est"	49	14	30	1	1	251	27.5	6.54	15.681	High	0	119.25	14	1
FALSE	Master Protein	GRMZM2G081102_P03	pep:known chromosome:AGPv3:3:158562948:158568434:-1 gene:GRMZM2G081102 transcript:GRMZM2G081102_T03 description:"est|protein"	53	11	33	2	1	208	23.9	10.84	15.379	High	0	119.22	11	0
FALSE	Master Protein	GRMZM2G057491_P01 pep:known chromosome:AGPv3:9:152347504:152351827:-1 gene:GRMZM2G057491 transcript:GRMZM2G057491_T01 description:"cdna	est omrna|protein"	31	23	33	4	1	715	80.9	7.91	2.631	High	0	119.19	23	0
FALSE	Master Protein	GRMZM2G090271_P01	pep:known chromosome:AGPv3:2:13601510:13603670:1 gene:GRMZM2G090271 transcript:GRMZM2G090271_T01 description:"est"	63	14	27	14	1	272	29.6	6.95	18.684	High	0	119.06	14	0
FALSE	Master Protein	GRMZM2G428096_P01 pep:novel chromosome:AGPv3:1:42855656:42857040:-1 gene:GRMZM2G428096 transcript:GRMZM2G428096_T01 description:"abinitio	omrna protein"	39	14	29	2	1	461	49.8	5.3	5.529	High	0	119.06	14	0
FALSE	Master Protein	GRMZM2G145280_P01 pep:known chromosome:AGPv3:8:160617135:160619687:-1 gene:GRMZM2G145280 transcript:GRMZM2G145280_T01 description:"cdna	est omrna|protein"	50	11	33	1	1	208	23.9	10.71	15.379	High	0	118.61	11	1
FALSE	Master Protein	GRMZM2G132929_P04	pep:novel chromosome:AGPv3:6:166161670:166163427:-1 gene:GRMZM2G132929 transcript:GRMZM2G132929_T04 description:"est"	54	8	25	1	1	156	16.9	5.76	76.426	High	0	118.51	8	7
FALSE	Master Protein	GRMZM2G070562_P01	pep:novel chromosome:AGPv3:3:169660377:169664257:-1 gene:GRMZM2G070562 transcript:GRMZM2G070562_T01 description:"est"	37	21	29	21	1	660	72.6	9.17	2.814	High	0	118.35	21	0
FALSE	Master Protein	GRMZM2G427815_P01 pep:known chromosome:AGPv3:7:172809274:172811080:1 gene:GRMZM2G427815 transcript:GRMZM2G427815_T01 description:"cdna	est omrna|protein"	59	10	25	10	1	320	33.2	6.65	14.399	High	0	118.34	10	0
FALSE	Master Protein	GRMZM5G874500_P02	pep:known chromosome:AGPv3:8:116148238:116153056:1 gene:GRMZM5G874500 transcript:GRMZM5G874500_T02 description:"est|protein"	37	19	32	17	1	561	64.5	6.51	4.179	High	0	118.28	19	2
FALSE	Master Protein	GRMZM2G077406_P01 pep:known chromosome:AGPv3:7:146152862:146156171:-1 gene:GRMZM2G077406 transcript:GRMZM2G077406_T01 description:"cdna	est omrna|protein"	38	21	26	21	1	687	77.9	5.33	2.938	High	0	118.26	21	0
FALSE	Master Protein	GRMZM2G082007_P01 pep:known chromosome:AGPv3:4:169989717:169993675:-1 gene:GRMZM2G082007 transcript:GRMZM2G082007_T01 description:"cdna	est omrna|protein"	40	12	27	12	1	374	39.6	5.33	4.926	High	0	118.17	12	0
FALSE	Master Protein	GRMZM2G059121_P01 pep:known chromosome:AGPv3:6:151634616:151638506:1 gene:GRMZM2G059121 transcript:GRMZM2G059121_T01 description:"cdna	est omrna|protein"	45	11	25	11	1	290	31.2	8.62	7.031	High	0	118.09	11	0
FALSE	Master Protein	GRMZM2G409407_P01 pep:known chromosome:AGPv3:6:128244977:128247835:-1 gene:GRMZM2G409407 transcript:GRMZM2G409407_T01 description:"cdna	est omrna|protein"	47	11	32	2	1	208	23.8	10.77	12.895	High	0	117.72	11	9
FALSE	Master Protein	GRMZM2G039345_P01	pep:known chromosome:AGPv3:2:4166453:4168712:1 gene:GRMZM2G039345 transcript:GRMZM2G039345_T01 description:"cdna"	26	4	26	3	1	203	23.1	5.31	2.831	High	0	117.47	4	0
FALSE	Master Protein	GRMZM2G028945_P01 pep:known chromosome:AGPv3:10:107779958:107784706:1 gene:GRMZM2G028945 transcript:GRMZM2G028945_T01 description:"cdna	est omrna|protein"	41	12	26	12	1	343	38.9	4.93	7.913	High	0	117.45	12	0
FALSE	Master Protein	GRMZM2G016084_P01	pep:known chromosome:AGPv3:1:297827063:297830266:-1 gene:GRMZM2G016084 transcript:GRMZM2G016084_T01 description:"cdna"	39	15	31	15	1	370	40.6	5.91	10.053	High	0	117.41	15	0
FALSE	Master Protein	GRMZM2G038494_P01	pep:known chromosome:AGPv3:1:284075744:284078940:-1 gene:GRMZM2G038494 transcript:GRMZM2G038494_T01 description:"cdna|est"	39	12	26	12	1	431	46.8	7.17	5.062	High	0	117.22	12	0
FALSE	Master Protein	GRMZM2G018403_P01 pep:known chromosome:AGPv3:5:139666597:139670914:1 gene:GRMZM2G018403 transcript:GRMZM2G018403_T01 description:"cdna	est omrna|protein"	56	9	23	2	1	231	25.3	9.35	22.101	High	0	117.21	9	9
FALSE	Master Protein	GRMZM2G102230_P01 pep:known chromosome:AGPv3:4:171717829:171721643:-1 gene:GRMZM2G102230 transcript:GRMZM2G102230_T01 description:"cdna	est omrna|protein"	70	9	30	9	1	140	15	10.39	38.811	High	0	117.09	9	0
FALSE	Master Protein	GRMZM2G402936_P01 pep:known chromosome:AGPv3:6:165101052:165102377:1 gene:GRMZM2G402936 transcript:GRMZM2G402936_T01 description:"cdna	est omrna"	12	2	24	2	1	244	27	12.02	1.276	High	0	116.94	2	0
FALSE	Master Protein	GRMZM2G150166_P01	pep:known chromosome:AGPv3:1:270417003:270422432:1 gene:GRMZM2G150166 transcript:GRMZM2G150166_T01 description:"est|omrna"	45	20	29	5	1	488	51.9	8.1	4.436	High	0	116.84	20	15
FALSE	Master Protein	GRMZM5G809546_P01	pep:known chromosome:AGPv3:10:52428891:52457207:-1 gene:GRMZM5G809546 transcript:GRMZM5G809546_T01 description:"cdna|est"	25	12	29	12	1	553	59.3	9.72	2.282	High	0	116.79	12	0
FALSE	Master Protein	GRMZM2G394500_P01 pep:known chromosome:AGPv3:10:85654598:85659508:1 gene:GRMZM2G394500 transcript:GRMZM2G394500_T01 description:"cdna	est omrna|protein"	49	15	30	14	1	354	38	7.94	10.103	High	0	116.64	15	1
FALSE	Master Protein	GRMZM6G326542_P01	pep:novel scaffold:AGPv3:scaffold_360:1317:3136:1 gene:GRMZM6G326542 transcript:GRMZM6G326542_T01 description:"cdna"	62	9	26	8	1	223	23.7	6.77	14.849	High	0	116.47	9	0
FALSE	Master Protein	GRMZM2G068479_P01 pep:known chromosome:AGPv3:9:134558710:134563155:-1 gene:GRMZM2G068479 transcript:GRMZM2G068479_T01 description:"cdna	est omrna"	30	19	31	3	1	722	82	7.5	2.7	High	0	116.41	19	0
FALSE	Master Protein	GRMZM2G017419_P01 pep:known chromosome:AGPv3:10:89936005:89938072:1 gene:GRMZM2G017419 transcript:GRMZM2G017419_T01 description:"cdna	est omrna|protein"	51	7	28	2	1	180	19.1	7.68	20.544	High	0	116.41	7	0
FALSE	Master Protein	GRMZM2G179703_P02 pep:known chromosome:AGPv3:1:202955872:202958418:1 gene:GRMZM2G179703 transcript:GRMZM2G179703_T02 description:"cdna	est omrna|protein"	33	12	27	12	1	444	47.6	5.76	3.365	High	0	116.13	12	0
FALSE	Master Protein	GRMZM2G066650_P01 pep:known chromosome:AGPv3:3:126647886:126655782:-1 gene:GRMZM2G066650 transcript:GRMZM2G066650_T01 description:"cdna	est omrna|protein"	25	17	27	6	1	872	95.8	4.69	2.511	High	0	115.99	17	0
FALSE	Master Protein	GRMZM2G081745_P01 pep:known chromosome:AGPv3:2:111112565:111127002:-1 gene:GRMZM2G081745 transcript:GRMZM2G081745_T01 description:"cdna	est omrna|protein"	25	22	30	7	1	1018	110.8	7.11	2.782	High	0	115.94	22	15
FALSE	Master Protein	GRMZM2G177720_P01 pep:known chromosome:AGPv3:4:199253963:199255236:-1 gene:GRMZM2G177720 transcript:GRMZM2G177720_T01 description:"est	omrna protein"	42	6	24	6	1	153	17.3	9.85	3.642	High	0	115.81	6	0
FALSE	Master Protein	AC155496.2_FGP009	pep:novel chromosome:AGPv3:5:4777614:4787374:-1 gene:AC155496.2_FG009 transcript:AC155496.2_FGT009 description:"omrna"	27	25	34	2	1	831	94.2	8.46	1.943	High	0	115.67	25	23
FALSE	Master Protein	GRMZM2G047592_P02 pep:known chromosome:AGPv3:7:89458327:89461692:-1 gene:GRMZM2G047592 transcript:GRMZM2G047592_T02 description:"cdna	est omrna"	54	11	28	11	1	315	34.2	6.02	14.013	High	0	115.62	11	0
FALSE	Master Protein	GRMZM2G000510_P04	pep:known chromosome:AGPv3:4:32433:63643:-1 gene:GRMZM2G000510 transcript:GRMZM2G000510_T04 description:"est"	42	13	27	13	1	310	32.8	9.5	5.7	High	0	115.62	13	0
FALSE	Master Protein	GRMZM2G044306_P01 pep:known chromosome:AGPv3:10:79758710:79767554:1 gene:GRMZM2G044306 transcript:GRMZM2G044306_T01 description:"cdna	est omrna|protein"	15	24	31	24	1	1850	206	6.1	1.005	High	0	115.58	24	0
FALSE	Master Protein	GRMZM2G144387_P03	pep:known chromosome:AGPv3:1:205135108:205138674:1 gene:GRMZM2G144387 transcript:GRMZM2G144387_T03 description:"est"	39	9	28	2	1	216	24.5	9.82	9	High	0	115.56	9	8
FALSE	Master Protein	GRMZM2G144995_P01 pep:known chromosome:AGPv3:1:60218725:60221796:-1 gene:GRMZM2G144995 transcript:GRMZM2G144995_T01 description:"cdna	est omrna|protein"	45	19	27	3	1	545	60.5	8.81	4.08	High	0	115.36	19	17
FALSE	Master Protein	GRMZM2G042253_P01 pep:known chromosome:AGPv3:1:33475624:33479513:-1 gene:GRMZM2G042253 transcript:GRMZM2G042253_T01 description:"cdna	est omrna|protein"	43	22	29	22	1	588	63.5	7.06	4.135	High	0	115.29	22	0
FALSE	Master Protein	GRMZM2G032163_P01 pep:known chromosome:AGPv3:4:174625866:174638460:-1 gene:GRMZM2G032163 transcript:GRMZM2G032163_T01 description:"cdna	est omrna|protein"	30	21	29	21	1	775	87.6	5.15	3.062	High	0	115.25	21	0
FALSE	Master Protein	GRMZM2G322953_P05	pep:known chromosome:AGPv3:8:100382637:100385781:-1 gene:GRMZM2G322953 transcript:GRMZM2G322953_T05 description:"est|protein"	28	11	29	3	1	376	41.1	6.73	6.305	High	0	115.22	11	0
FALSE	Master Protein	GRMZM2G012119_P01 pep:known chromosome:AGPv3:1:246605656:246608098:1 gene:GRMZM2G012119 transcript:GRMZM2G012119_T01 description:"cdna	est omrna|protein"	54	7	24	6	1	267	28.4	4.93	7.577	High	0	115.12	7	1
FALSE	Master Protein	GRMZM2G156486_P01 pep:known chromosome:AGPv3:1:15989647:15996740:1 gene:GRMZM2G156486 transcript:GRMZM2G156486_T01 description:"est	omrna protein"	35	12	28	6	1	356	38.4	7.93	7.913	High	0	114.84	12	6
FALSE	Master Protein	GRMZM2G067853_P01 pep:known chromosome:AGPv3:5:52146625:52168252:1 gene:GRMZM2G067853 transcript:GRMZM2G067853_T01 description:"est	omrna protein"	38	22	26	22	1	823	87.5	7.46	2.7	High	0	114.76	22	0
FALSE	Master Protein	GRMZM2G321053_P01 pep:known chromosome:AGPv3:1:6191870:6194809:-1 gene:GRMZM2G321053 transcript:GRMZM2G321053_T01 description:"cdna	est omrna|protein"	55	14	27	14	1	379	40.4	5.62	11.452	High	0	114.76	14	0
FALSE	Master Protein	GRMZM2G010044_P01 pep:known chromosome:AGPv3:4:239420850:239424822:1 gene:GRMZM2G010044 transcript:GRMZM2G010044_T01 description:"cdna	est protein"	37	14	29	5	1	505	54.6	7.11	4.623	High	0	114.72	14	0
FALSE	Master Protein	GRMZM2G019437_P01 pep:known chromosome:AGPv3:3:207497548:207507222:-1 gene:GRMZM2G019437 transcript:GRMZM2G019437_T01 description:"cdna	est protein"	54	16	27	16	1	360	38.7	8.25	7.254	High	0	114.67	16	0
FALSE	Master Protein	GRMZM2G169671_P01 pep:known chromosome:AGPv3:1:275290500:275294312:-1 gene:GRMZM2G169671 transcript:GRMZM2G169671_T01 description:"cdna	est omrna|protein"	64	12	24	12	1	255	26.9	6.52	10.548	High	0	114.67	12	0
FALSE	Master Protein	AC203535.4_FGP004	pep:known chromosome:AGPv3:3:157628535:157630958:-1 gene:AC203535.4_FG004 transcript:AC203535.4_FGT004 description:"est"	36	7	24	7	1	370	39.8	7.93	3.281	High	0	114.6	7	0
FALSE	Master Protein	GRMZM2G144372_P01 pep:known chromosome:AGPv3:6:167313271:167317323:-1 gene:GRMZM2G144372 transcript:GRMZM2G144372_T01 description:"cdna	est omrna|protein"	53	17	26	4	1	377	42.7	5.64	5.529	High	0	114.37	17	13
FALSE	Master Protein	GRMZM2G069195_P01 pep:known chromosome:AGPv3:8:9901273:9905102:-1 gene:GRMZM2G069195 transcript:GRMZM2G069195_T01 description:"cdna	est omrna|protein"	45	16	29	6	1	387	41.7	8.78	8.047	High	0	114.35	16	9
FALSE	Master Protein	GRMZM2G154007_P01 pep:known chromosome:AGPv3:1:19326236:19329031:-1 gene:GRMZM2G154007 transcript:GRMZM2G154007_T01 description:"cdna	est protein"	43	12	25	12	1	383	40.9	6.52	6.197	High	0	114.29	12	0
FALSE	Master Protein	GRMZM2G108712_P03 pep:known chromosome:AGPv3:4:173062996:173064850:-1 gene:GRMZM2G108712 transcript:GRMZM2G108712_T03 description:"cdna	est omrna|protein"	52	12	27	2	1	263	29.3	4.75	10.365	High	0	114.24	12	0
FALSE	Master Protein	GRMZM2G146819_P01 pep:known chromosome:AGPv3:1:246713747:246726650:-1 gene:GRMZM2G146819 transcript:GRMZM2G146819_T01 description:"cdna	est omrna|protein"	25	27	30	27	1	1264	142.3	6.7	1.116	High	0	114.16	27	0
FALSE	Master Protein	GRMZM2G079817_P01 pep:known chromosome:AGPv3:4:140374941:140377781:1 gene:GRMZM2G079817 transcript:GRMZM2G079817_T01 description:"cdna	est omrna|protein"	47	20	27	9	1	541	59.1	4.68	4.179	High	0	114.15	20	0
FALSE	Master Protein	GRMZM2G377115_P01	pep:known chromosome:AGPv3:4:12946774:12961838:1 gene:GRMZM2G377115 transcript:GRMZM2G377115_T01 description:"est|protein"	37	22	29	22	1	691	78.1	5.72	2.403	High	0	114.11	22	0
FALSE	Master Protein	GRMZM2G005298_P01 pep:known chromosome:AGPv3:8:141524268:141528926:1 gene:GRMZM2G005298 transcript:GRMZM2G005298_T01 description:"cdna	est omrna|protein"	29	20	28	20	1	899	103.4	6.29	1.649	High	0	114.09	20	0
FALSE	Master Protein	GRMZM2G167103_P02 pep:known chromosome:AGPv3:4:241166057:241168652:1 gene:GRMZM2G167103 transcript:GRMZM2G167103_T02 description:"cdna	est omrna|protein"	45	9	30	4	1	190	21.4	9.76	10.938	High	0	114.05	9	0
FALSE	Master Protein	GRMZM5G859195_P02	pep:known chromosome:AGPv3:3:187980568:187985888:-1 gene:GRMZM5G859195 transcript:GRMZM5G859195_T02 description:"est"	37	14	27	14	1	410	44.5	6.7	3.642	High	0	113.98	14	0
FALSE	Master Protein	GRMZM2G090274_P01 pep:known chromosome:AGPv3:2:209195057:209199581:-1 gene:GRMZM2G090274 transcript:GRMZM2G090274_T01 description:"cdna	est protein"	36	15	28	8	1	437	49.2	5.52	6.11	High	0	113.87	15	7
FALSE	Master Protein	GRMZM5G806257_P01	pep:known chromosome:AGPv3:5:215301608:215309302:1 gene:GRMZM5G806257 transcript:GRMZM5G806257_T01 description:"est|mrna"	26	15	29	15	1	737	81.6	4.84	2.162	High	0	113.76	15	0
FALSE	Master Protein	GRMZM2G044027_P02 pep:known chromosome:AGPv3:1:41473411:41477466:1 gene:GRMZM2G044027 transcript:GRMZM2G044027_T02 description:"cdna	est omrna|protein"	53	17	28	2	1	350	39.3	7.61	10.103	High	0	113.71	17	0
FALSE	Master Protein	GRMZM2G019236_P03	pep:known chromosome:AGPv3:4:19446306:19462088:-1 gene:GRMZM2G019236 transcript:GRMZM2G019236_T03 description:"est|omrna"	19	19	30	15	1	1100	117.7	6.71	2.34	High	0	113.64	19	5
FALSE	Master Protein	GRMZM2G348873_P01 pep:known chromosome:AGPv3:6:165448578:165453759:-1 gene:GRMZM2G348873 transcript:GRMZM2G348873_T01 description:"abinitio	cdna est|omrna|protein"	29	15	26	5	1	620	65.7	7.58	4.125	High	0	113.54	15	10
FALSE	Master Protein	GRMZM2G063048_P01	pep:novel chromosome:AGPv3:1:59865304:59866740:-1 gene:GRMZM2G063048 transcript:GRMZM2G063048_T01 description:"est"	32	10	28	10	1	376	40.5	7.83	4.78	High	0	113.53	10	0
FALSE	Master Protein	GRMZM2G098039_P01 pep:known chromosome:AGPv3:8:134588554:134596045:1 gene:GRMZM2G098039 transcript:GRMZM2G098039_T01 description:"cdna	est omrna|protein"	21	17	30	17	1	1091	120.2	5.88	1.276	High	0	113.52	17	0
FALSE	Master Protein	GRMZM2G054149_P01 pep:known chromosome:AGPv3:4:224586232:224589900:1 gene:GRMZM2G054149 transcript:GRMZM2G054149_T01 description:"cdna	est omrna|protein"	38	8	24	1	1	227	24.8	8.51	13.678	High	0	113.49	8	0
FALSE	Master Protein	GRMZM2G161306_P01 pep:known chromosome:AGPv3:1:290467200:290468430:1 gene:GRMZM2G161306 transcript:GRMZM2G161306_T01 description:"cdna	est omrna|protein"	52	5	18	5	1	213	23.1	6.79	11.328	High	0	113.34	5	0
FALSE	Master Protein	GRMZM2G063340_P04 pep:known chromosome:AGPv3:7:21287558:21290256:-1 gene:GRMZM2G063340 transcript:GRMZM2G063340_T04 description:"cdna	est protein"	60	7	23	2	1	140	15	5.52	73.989	High	0	113.27	7	0
FALSE	Master Protein	GRMZM2G152757_P01	pep:known chromosome:AGPv3:10:15721331:15725740:1 gene:GRMZM2G152757 transcript:GRMZM2G152757_T01 description:"est|protein"	33	14	26	13	1	414	43.6	5.49	4.878	High	0	113.25	14	1
FALSE	Master Protein	GRMZM2G036708_P01 pep:known chromosome:AGPv3:2:107916119:107918479:1 gene:GRMZM2G036708 transcript:GRMZM2G036708_T01 description:"cdna	est omrna"	33	12	27	12	1	382	40.8	8.91	7.913	High	0	113.21	12	0
FALSE	Master Protein	GRMZM2G058276_P01 pep:known chromosome:AGPv3:8:6280931:6291548:-1 gene:GRMZM2G058276 transcript:GRMZM2G058276_T01 description:"cdna	est omrna|protein"	35	17	28	1	1	525	57.3	5.71	3.084	High	0	113.18	17	0
FALSE	Master Protein	GRMZM2G073150_P01 pep:known chromosome:AGPv3:6:108241675:108242722:1 gene:GRMZM2G073150 transcript:GRMZM2G073150_T01 description:"cdna	est omrna|protein"	62	11	28	2	1	142	16.4	10.14	132.352	High	0	113.05	11	11
FALSE	Master Protein	GRMZM2G181192_P01	pep:known chromosome:AGPv3:10:60090336:60096837:-1 gene:GRMZM2G181192 transcript:GRMZM2G181192_T01 description:"abinitio|est"	49	13	28	13	1	315	35.1	7.11	7.111	High	0	112.95	13	0
FALSE	Master Protein	GRMZM2G146697_P02 pep:known chromosome:AGPv3:3:161889774:161898813:1 gene:GRMZM2G146697 transcript:GRMZM2G146697_T02 description:"cdna	est omrna|protein"	28	21	28	11	1	969	105.5	5.76	1.637	High	0	112.8	21	10
FALSE	Master Protein	GRMZM2G080816_P02	pep:known chromosome:AGPv3:8:164165874:164169077:1 gene:GRMZM2G080816 transcript:GRMZM2G080816_T02 description:"est|omrna"	48	9	22	1	1	304	33.3	8.48	4.275	High	0	112.62	9	0
FALSE	Master Protein	GRMZM2G068982_P01 pep:known chromosome:AGPv3:2:10783943:10790356:1 gene:GRMZM2G068982 transcript:GRMZM2G068982_T01 description:"cdna	est protein"	51	15	26	15	1	341	37.1	7.27	8.006	High	0	112.59	15	0
FALSE	Master Protein	GRMZM2G070360_P01 pep:known chromosome:AGPv3:3:212237694:212247053:-1 gene:GRMZM2G070360 transcript:GRMZM2G070360_T01 description:"abinitio	cdna est|omrna|protein"	50	15	29	3	1	315	35.7	8.5	7.031	High	0	112.56	15	12
FALSE	Master Protein	GRMZM5G888263_P01	pep:novel chromosome:AGPv3:9:140236497:140240137:-1 gene:GRMZM5G888263 transcript:GRMZM5G888263_T01 description:"est"	45	10	27	3	1	247	26.7	7.58	10.45	High	0	112.54	10	0
FALSE	Master Protein	GRMZM2G402002_P01	pep:known chromosome:AGPv3:6:167630052:167639191:-1 gene:GRMZM2G402002 transcript:GRMZM2G402002_T01 description:"est"	25	25	29	13	1	1089	121.4	5.36	1.921	High	0	112.27	25	12
FALSE	Master Protein	GRMZM2G134439_P01 pep:known chromosome:AGPv3:5:98309006:98312767:1 gene:GRMZM2G134439 transcript:GRMZM2G134439_T01 description:"cdna	est omrna"	56	23	29	13	1	510	56.5	8.68	3.642	High	0	112.26	23	10
FALSE	Master Protein	GRMZM2G352129_P01 pep:known chromosome:AGPv3:2:31534332:31539953:-1 gene:GRMZM2G352129 transcript:GRMZM2G352129_T01 description:"cdna	est omrna|protein"	33	17	27	8	1	660	72.1	8.84	4.125	High	0	112.24	17	9
FALSE	Master Protein	GRMZM2G051276_P01 pep:known chromosome:AGPv3:4:236654329:236658102:-1 gene:GRMZM2G051276 transcript:GRMZM2G051276_T01 description:"cdna	est omrna|protein"	41	11	26	11	1	360	38.8	6.55	10.365	High	0	112.22	11	0
FALSE	Master Protein	GRMZM2G130332_P01 pep:known chromosome:AGPv3:1:150679023:150692114:1 gene:GRMZM2G130332 transcript:GRMZM2G130332_T01 description:"cdna	est omrna|protein"	38	11	27	4	1	352	37.8	6.38	6.197	High	0	112.17	11	0
FALSE	Master Protein	GRMZM2G058760_P01 pep:known chromosome:AGPv3:1:285208091:285211692:-1 gene:GRMZM2G058760 transcript:GRMZM2G058760_T01 description:"cdna	est protein"	55	16	27	14	1	381	41.8	8.78	5.422	High	0	112	16	2
FALSE	Master Protein	GRMZM2G176903_P01 pep:known chromosome:AGPv3:3:218404980:218407362:1 gene:GRMZM2G176903 transcript:GRMZM2G176903_T01 description:"cdna	est omrna|protein"	54	17	29	12	1	342	37.5	7.97	8.183	High	0	111.93	17	5
FALSE	Master Protein	GRMZM2G170400_P01 pep:known chromosome:AGPv3:6:162503096:162507889:-1 gene:GRMZM2G170400 transcript:GRMZM2G170400_T01 description:"cdna	est omrna|protein"	50	21	30	17	1	501	56.7	6.43	4.995	High	0	111.84	21	4
FALSE	Master Protein	GRMZM2G094428_P01 pep:known chromosome:AGPv3:3:225426503:225429660:-1 gene:GRMZM2G094428 transcript:GRMZM2G094428_T01 description:"cdna	est omrna|protein"	47	15	28	4	1	428	45.9	5.31	6.499	High	0	111.49	15	11
FALSE	Master Protein	GRMZM2G113056_P01 pep:known chromosome:AGPv3:7:174539360:174548995:1 gene:GRMZM2G113056 transcript:GRMZM2G113056_T01 description:"est	omrna protein"	25	19	25	6	1	980	107.1	5.69	1.417	High	0	111.43	19	13
FALSE	Master Protein	GRMZM2G145895_P01 pep:known chromosome:AGPv3:2:171510928:171513398:1 gene:GRMZM2G145895 transcript:GRMZM2G145895_T01 description:"cdna	est omrna|protein"	58	10	22	10	1	242	27	8.82	14.849	High	0	111.3	10	0
FALSE	Master Protein	GRMZM2G038848_P02 pep:known chromosome:AGPv3:1:254719163:254723764:1 gene:GRMZM2G038848 transcript:GRMZM2G038848_T02 description:"cdna	est omrna|protein"	44	14	24	14	1	416	45.3	8.47	4.248	High	0	111.22	14	0
FALSE	Master Protein	GRMZM2G110233_P01 pep:known chromosome:AGPv3:9:129269195:129272824:1 gene:GRMZM2G110233 transcript:GRMZM2G110233_T01 description:"cdna	est omrna|protein"	36	18	26	2	1	569	63.1	8.62	3.354	High	0	111.11	18	0
FALSE	Master Protein	GRMZM2G438524_P01 pep:known chromosome:AGPv3:1:299484354:299486920:1 gene:GRMZM2G438524 transcript:GRMZM2G438524_T01 description:"cdna	est omrna|protein"	27	17	27	17	1	716	78.6	6.9	2.665	High	0	111.1	17	0
FALSE	Master Protein	GRMZM2G179981_P01 pep:known chromosome:AGPv3:5:130695952:130704402:1 gene:GRMZM2G179981 transcript:GRMZM2G179981_T01 description:"cdna	est omrna|protein"	32	9	27	9	1	332	36.4	7.69	4.456	High	0	111.09	9	0
FALSE	Master Protein	GRMZM2G165917_P02	pep:known chromosome:AGPv3:4:238064651:238068549:-1 gene:GRMZM2G165917 transcript:GRMZM2G165917_T02 description:"est"	39	16	27	4	1	498	54	7.3	4.012	High	0	110.89	16	12
FALSE	Master Protein	GRMZM2G150190_P01 pep:known chromosome:AGPv3:4:235613746:235617819:1 gene:GRMZM2G150190 transcript:GRMZM2G150190_T01 description:"est	omrna protein"	60	11	25	2	1	186	20.2	7.83	33.551	High	0	110.73	11	10
FALSE	Master Protein	GRMZM2G018786_P03	pep:known chromosome:AGPv3:6:42768367:42772291:-1 gene:GRMZM2G018786 transcript:GRMZM2G018786_T03 description:"mrna"	37	13	26	13	1	429	47.5	5.95	3.642	High	0	110.68	13	0
FALSE	Master Protein	GRMZM2G005552_P01 pep:known chromosome:AGPv3:8:132711340:132712947:1 gene:GRMZM2G005552 transcript:GRMZM2G005552_T01 description:"cdna	est protein"	59	12	24	11	1	360	37.8	6.15	13.678	High	0	110.63	12	1
FALSE	Master Protein	GRMZM2G097109_P01 pep:known chromosome:AGPv3:1:263255737:263263447:1 gene:GRMZM2G097109 transcript:GRMZM2G097109_T01 description:"cdna	est omrna|protein"	38	13	27	4	1	377	39.9	9.07	7.913	High	0	110.48	13	9
FALSE	Master Protein	GRMZM2G050329_P01	pep:novel chromosome:AGPv3:9:24473175:24478967:-1 gene:GRMZM2G050329 transcript:GRMZM2G050329_T01 description:"est"	22	15	28	14	1	742	82.7	8.12	2.162	High	0	110.47	15	1
FALSE	Master Protein	AC217300.3_FGP005	pep:known chromosome:AGPv3:1:43425377:43426045:-1 gene:AC217300.3_FG005 transcript:AC217300.3_FGT005 description:"abinitio"	55	13	28	1	1	222	24.3	8.81	10.45	High	0	110.25	13	13
FALSE	Master Protein	GRMZM2G116273_P01 pep:known chromosome:AGPv3:8:172671226:172674089:1 gene:GRMZM2G116273 transcript:GRMZM2G116273_T01 description:"cdna	est omrna|protein"	52	10	26	8	1	214	23.8	5.62	34.112	High	0	110.11	10	2
FALSE	Master Protein	GRMZM2G450125_P01 pep:known chromosome:AGPv3:1:9051958:9054939:1 gene:GRMZM2G450125 transcript:GRMZM2G450125_T01 description:"cdna	est omrna|protein"	44	19	26	18	1	573	61.6	5.41	4.736	High	0	109.97	19	1
FALSE	Master Protein	GRMZM2G030523_P01 pep:known chromosome:AGPv3:5:214473508:214475861:1 gene:GRMZM2G030523 transcript:GRMZM2G030523_T01 description:"cdna	est omrna|protein"	52	12	26	2	1	263	29.3	4.75	10.365	High	0	109.94	12	12
FALSE	Master Protein	AC233922.1_FGP005	pep:known chromosome:AGPv3:4:238598643:238601466:-1 gene:AC233922.1_FG005 transcript:AC233922.1_FGT005 description:"abinitio"	47	14	26	14	1	369	39.5	9.31	6.586	High	0	109.62	14	0
FALSE	Master Protein	GRMZM2G462613_P01 pep:known chromosome:AGPv3:5:96392076:96399771:1 gene:GRMZM2G462613 transcript:GRMZM2G462613_T01 description:"cdna	est omrna|protein"	22	23	31	16	1	1037	116.2	7.31	1.683	High	0	109.61	23	3
FALSE	Master Protein	AC217556.3_FGP003	pep:novel chromosome:AGPv3:5:37953397:37958890:-1 gene:AC217556.3_FG003 transcript:AC217556.3_FGT003 description:"abinitio"	37	15	26	15	1	459	50.8	9.74	4.125	High	0	109.61	15	0
FALSE	Master Protein	GRMZM2G027451_P04	pep:known chromosome:AGPv3:1:247606591:247608920:1 gene:GRMZM2G027451 transcript:GRMZM2G027451_T04 description:"cdna"	35	10	26	10	1	245	27.9	10.05	12.111	High	0	109.59	10	0
FALSE	Master Protein	GRMZM5G803981_P01	pep:known chromosome:AGPv3:2:204826414:204829319:1 gene:GRMZM5G803981 transcript:GRMZM5G803981_T01 description:"est|mrna"	38	16	26	16	1	595	65.3	5.11	3.146	High	0	109.57	16	0
FALSE	Master Protein	GRMZM2G033799_P01 pep:known chromosome:AGPv3:8:100920138:100924873:1 gene:GRMZM2G033799 transcript:GRMZM2G033799_T01 description:"cdna	est omrna|protein"	53	17	28	9	1	461	49.3	8.18	6.017	High	0	109.55	17	8
FALSE	Master Protein	GRMZM2G012319_P01 pep:known chromosome:AGPv3:1:38540863:38552452:1 gene:GRMZM2G012319 transcript:GRMZM2G012319_T01 description:"cdna	est omrna"	20	18	26	18	1	1177	126.9	5.74	1.104	High	0	109.33	18	0
FALSE	Master Protein	GRMZM5G866758_P02	pep:known chromosome:AGPv3:1:68438377:68443920:1 gene:GRMZM5G866758 transcript:GRMZM5G866758_T02 description:"cdna"	52	14	26	8	1	401	41.2	6.55	5.31	High	0	109.28	14	6
FALSE	Master Protein	GRMZM2G065757_P01 pep:known chromosome:AGPv3:6:165214021:165220621:1 gene:GRMZM2G065757 transcript:GRMZM2G065757_T01 description:"cdna	est omrna|protein"	35	13	25	6	1	510	54.5	5.64	2.981	High	0	109.24	13	7
FALSE	Master Protein	GRMZM2G127139_P01 pep:known chromosome:AGPv3:2:45068944:45077882:-1 gene:GRMZM2G127139 transcript:GRMZM2G127139_T01 description:"cdna	est omrna|protein"	29	18	27	13	1	669	73.3	7.23	2.695	High	0	109.23	18	5
FALSE	Master Protein	GRMZM2G701201_P02	pep:novel chromosome:AGPv3:6:154501493:154508327:1 gene:GRMZM2G701201 transcript:GRMZM2G701201_T02 description:"cdna"	15	19	28	19	1	1251	136.1	7.72	1.34	High	0	109	19	0
FALSE	Master Protein	GRMZM2G045287_P01 pep:known chromosome:AGPv3:7:164278748:164282312:1 gene:GRMZM2G045287 transcript:GRMZM2G045287_T01 description:"cdna	est omrna|protein"	34	11	28	1	1	361	40.9	7.05	4.754	High	0	108.86	11	1
FALSE	Master Protein	GRMZM2G072744_P01 pep:known chromosome:AGPv3:1:282605048:282608688:-1 gene:GRMZM2G072744 transcript:GRMZM2G072744_T01 description:"cdna	est omrna|protein"	45	13	27	9	1	358	37.4	7.72	7.185	High	0	108.81	13	3
FALSE	Master Protein	GRMZM2G022275_P01	pep:known chromosome:AGPv3:9:87872969:87880378:-1 gene:GRMZM2G022275 transcript:GRMZM2G022275_T01 description:"abinitio|protein"	37	13	27	5	1	484	52.9	7.28	3.037	High	0	108.74	13	8
FALSE	Master Protein	GRMZM2G117786_P01 pep:known chromosome:AGPv3:4:82035094:82039089:-1 gene:GRMZM2G117786 transcript:GRMZM2G117786_T01 description:"cdna	est omrna|protein"	35	14	26	6	1	472	49	8.41	6.499	High	0	108.71	14	0
FALSE	Master Protein	GRMZM2G052389_P01	pep:known chromosome:AGPv3:9:28517992:28523621:-1 gene:GRMZM2G052389 transcript:GRMZM2G052389_T01 description:"cdna|est"	37	21	29	12	1	667	74.3	7.21	3.024	High	0	108.67	21	0
FALSE	Master Protein	AC182617.3_FGP001	pep:known chromosome:AGPv3:3:127323462:127329589:-1 gene:AC182617.3_FG001 transcript:AC182617.3_FGT001 description:"abinitio"	41	13	27	6	1	353	37.9	6.46	7.111	High	0	108.64	13	8
FALSE	Master Protein	GRMZM5G861300_P01	pep:known chromosome:AGPv3:3:213048021:213067089:-1 gene:GRMZM5G861300 transcript:GRMZM5G861300_T01 description:"est|mrna"	26	15	25	14	1	655	72.6	5.95	2.262	High	0	108.63	15	1
FALSE	Master Protein	GRMZM2G456570_P01 pep:known chromosome:AGPv3:6:168171784:168190342:1 gene:GRMZM2G456570 transcript:GRMZM2G456570_T01 description:"cdna	est omrna|protein"	21	23	28	23	1	1227	141	7.5	1.075	High	0	108.51	23	0
FALSE	Master Protein	GRMZM2G034083_P01 pep:known chromosome:AGPv3:3:128543602:128547615:1 gene:GRMZM2G034083 transcript:GRMZM2G034083_T01 description:"cdna	est protein"	44	15	27	9	1	422	46.6	5.72	6.406	High	0	108.49	15	6
FALSE	Master Protein	GRMZM2G166659_P04	pep:known chromosome:AGPv3:6:123384114:123386076:1 gene:GRMZM2G166659 transcript:GRMZM2G166659_T04 description:"cdna|est"	50	9	30	4	1	152	16.9	10.21	73.989	High	0	108.29	9	0
FALSE	Master Protein	GRMZM2G177077_P01 pep:known chromosome:AGPv3:10:99381158:99387758:1 gene:GRMZM2G177077 transcript:GRMZM2G177077_T01 description:"cdna	est omrna|protein"	38	20	31	13	1	598	67	8.16	2.615	High	0	107.98	20	0
FALSE	Master Protein	GRMZM2G064159_P01 pep:known chromosome:AGPv3:10:123831268:123835202:1 gene:GRMZM2G064159 transcript:GRMZM2G064159_T01 description:"cdna	est omrna"	42	14	26	13	1	372	41.6	4.98	4.109	High	0	107.81	14	0
FALSE	Master Protein	GRMZM2G031107_P02 pep:known chromosome:AGPv3:5:181440754:181446379:1 gene:GRMZM2G031107 transcript:GRMZM2G031107_T02 description:"cdna	est omrna|protein"	37	20	32	10	1	517	58.6	7.14	3.252	High	0	107.7	20	9
FALSE	Master Protein	GRMZM2G003246_P01 pep:known chromosome:AGPv3:7:126570689:126572284:1 gene:GRMZM2G003246 transcript:GRMZM2G003246_T01 description:"cdna	est omrna|protein"	31	7	22	7	1	371	39.5	6.38	4.275	High	0	107.68	7	0
FALSE	Master Protein	GRMZM2G159250_P01 pep:known chromosome:AGPv3:4:38853931:38857911:1 gene:GRMZM2G159250 transcript:GRMZM2G159250_T01 description:"cdna	est protein"	43	12	27	3	1	264	29.2	9.19	9	High	0	107.6	12	9
FALSE	Master Protein	AC149828.2_FGP002	pep:novel chromosome:AGPv3:9:150685413:150689960:1 gene:AC149828.2_FG002 transcript:AC149828.2_FGT002 description:"abinitio"	66	13	27	1	1	214	23.8	7.12	16.783	High	0	107.56	13	0
FALSE	Master Protein	GRMZM2G030203_P01 pep:known chromosome:AGPv3:9:138809906:138810852:1 gene:GRMZM2G030203 transcript:GRMZM2G030203_T01 description:"cdna	est omrna|protein"	55	13	27	1	1	222	24.3	8.65	10.45	High	0	107.55	13	0
FALSE	Master Protein	GRMZM2G037698_P02 pep:known chromosome:AGPv3:1:234059743:234071028:-1 gene:GRMZM2G037698 transcript:GRMZM2G037698_T02 description:"cdna	est omrna|protein"	40	19	27	7	1	526	57.6	6.43	5.629	High	0	107.53	19	12
FALSE	Master Protein	GRMZM2G148872_P01 pep:known chromosome:AGPv3:9:87671921:87677067:1 gene:GRMZM2G148872 transcript:GRMZM2G148872_T01 description:"cdna	est omrna|protein"	33	11	26	11	1	402	45	9.2	2.914	High	0	107.42	11	0
FALSE	Master Protein	GRMZM2G064473_P01	pep:known chromosome:AGPv3:3:214552561:214558272:1 gene:GRMZM2G064473 transcript:GRMZM2G064473_T01 description:"est"	14	11	29	2	1	612	66.8	9.89	2.275	High	0	107.24	11	2
FALSE	Master Protein	GRMZM2G471357_P01	pep:known chromosome:AGPv3:9:60950055:60951913:-1 gene:GRMZM2G471357 transcript:GRMZM2G471357_T01 description:"omrna|protein"	52	11	23	11	1	313	32.9	8.21	9	High	0	107.19	11	0
FALSE	Master Protein	GRMZM2G073584_P02	pep:known chromosome:AGPv3:3:141289902:141354044:1 gene:GRMZM2G073584 transcript:GRMZM2G073584_T02 description:"est|protein"	26	18	25	18	1	918	101.8	5.52	2.511	High	0	107.17	18	0
FALSE	Master Protein	GRMZM2G046681_P01 pep:known chromosome:AGPv3:3:226660317:226665214:1 gene:GRMZM2G046681 transcript:GRMZM2G046681_T01 description:"est	omrna protein"	18	10	24	2	1	614	67.6	9.41	2.808	High	0	107.1	10	11
FALSE	Master Protein	GRMZM2G048121_P01 pep:known chromosome:AGPv3:1:113349058:113350674:-1 gene:GRMZM2G048121 transcript:GRMZM2G048121_T01 description:"cdna	est omrna|protein"	51	14	24	13	1	358	39	6.06	5.918	High	0	106.87	14	1
FALSE	Master Protein	GRMZM5G815808_P01	pep:known chromosome:AGPv3:8:102984419:102986451:1 gene:GRMZM5G815808 transcript:GRMZM5G815808_T01 description:"est"	40	9	20	9	1	387	41.6	7.91	5.952	High	0	106.85	9	0
FALSE	Master Protein	GRMZM5G839422_P01	pep:known chromosome:AGPv3:3:17291735:17297668:-1 gene:GRMZM5G839422 transcript:GRMZM5G839422_T01 description:"cdna|est"	17	10	25	6	1	455	48.7	9.25	10.45	High	0	106.75	10	4
FALSE	Master Protein	GRMZM2G024738_P04	pep:known chromosome:AGPv3:8:144493493:144498999:-1 gene:GRMZM2G024738 transcript:GRMZM2G024738_T04 description:"est"	27	8	25	8	1	400	44.2	7.96	6.627	High	0	106.72	8	0
FALSE	Master Protein	GRMZM2G138230_P03 pep:known chromosome:AGPv3:7:150538439:150548805:1 gene:GRMZM2G138230 transcript:GRMZM2G138230_T03 description:"cdna	est omrna"	21	21	26	21	1	1273	138.9	6.93	1.371	High	0	106.67	21	0
FALSE	Master Protein	GRMZM2G002687_P01	pep:known chromosome:AGPv3:1:264809026:264817001:1 gene:GRMZM2G002687 transcript:GRMZM2G002687_T01 description:"cdna|est"	50	15	27	15	1	408	46.1	6.18	3.771	High	0	106.61	15	0
FALSE	Master Protein	GRMZM2G051270_P01 pep:known chromosome:AGPv3:5:7710238:7714213:1 gene:GRMZM2G051270 transcript:GRMZM2G051270_T01 description:"cdna	est omrna|protein"	42	19	29	3	1	489	53.7	8.92	4.233	High	0	106.54	19	12
FALSE	Master Protein	GRMZM2G149952_P01 pep:known chromosome:AGPv3:1:275157705:275161519:-1 gene:GRMZM2G149952 transcript:GRMZM2G149952_T01 description:"cdna	est omrna|protein"	42	18	28	2	1	487	53.6	8.46	4.125	High	0	106.5	18	0
FALSE	Master Protein	GRMZM2G162992_P02	pep:known chromosome:AGPv3:4:229945931:229952009:-1 gene:GRMZM2G162992 transcript:GRMZM2G162992_T02 description:"mrna"	22	13	26	7	1	692	70.8	6.15	6.305	High	0	106.44	13	6
FALSE	Master Protein	AC185226.4_FGP001	pep:novel chromosome:AGPv3:4:162608157:162617862:-1 gene:AC185226.4_FG001 transcript:AC185226.4_FGT001 description:"abinitio"	26	21	26	9	1	929	101.5	7.61	1.512	High	0	106.44	21	0
FALSE	Master Protein	GRMZM2G101867_P01 pep:known chromosome:AGPv3:2:148341982:148347423:-1 gene:GRMZM2G101867 transcript:GRMZM2G101867_T01 description:"cdna	est omrna|protein"	38	16	26	10	1	506	55.3	5.24	5.105	High	0	106.37	16	6
FALSE	Master Protein	GRMZM2G181194_P01 pep:known chromosome:AGPv3:4:52421835:52425639:-1 gene:GRMZM2G181194 transcript:GRMZM2G181194_T01 description:"cdna	est protein"	33	8	26	2	1	215	24.6	9.82	7.577	High	0	106.36	8	0
FALSE	Master Protein	GRMZM2G059363_P01 pep:known chromosome:AGPv3:5:91851841:91869019:1 gene:GRMZM2G059363 transcript:GRMZM2G059363_T01 description:"cdna	est omrna|protein"	38	10	24	1	1	265	28.6	9.47	7.733	High	0	106.32	10	0
FALSE	Master Protein	GRMZM2G096695_P01 pep:known chromosome:AGPv3:10:119842768:119843792:-1 gene:GRMZM2G096695 transcript:GRMZM2G096695_T01 description:"cdna	est omrna|protein"	52	8	25	8	1	140	15.7	8.16	26.826	High	0	106.25	8	0
FALSE	Master Protein	GRMZM2G037177_P01 pep:known chromosome:AGPv3:7:169878080:169881096:-1 gene:GRMZM2G037177 transcript:GRMZM2G037177_T01 description:"cdna	est omrna|protein"	43	8	25	8	1	239	26	6.76	11.115	High	0	106.2	8	0
FALSE	Master Protein	GRMZM2G031721_P01 pep:known chromosome:AGPv3:10:130329657:130333441:1 gene:GRMZM2G031721 transcript:GRMZM2G031721_T01 description:"abinitio	cdna est|omrna|protein"	40	15	24	15	1	381	41.1	5.48	7.962	High	0	106.09	15	0
FALSE	Master Protein	GRMZM2G085924_P01 pep:known chromosome:AGPv3:2:127723813:127725400:-1 gene:GRMZM2G085924 transcript:GRMZM2G085924_T01 description:"cdna	est omrna|protein"	34	11	25	11	1	363	40.2	6.01	11.743	High	0	105.82	11	0
FALSE	Master Protein	GRMZM2G164562_P01	pep:known chromosome:AGPv3:1:35459890:35470305:-1 gene:GRMZM2G164562 transcript:GRMZM2G164562_T01 description:"mrna"	49	18	27	15	1	440	47	7.74	6.667	High	0	105.73	18	3
FALSE	Master Protein	GRMZM2G124307_P01 pep:known chromosome:AGPv3:1:212101742:212102844:-1 gene:GRMZM2G124307 transcript:GRMZM2G124307_T01 description:"cdna	est omrna|protein"	56	12	29	10	1	181	20.9	7.44	15.379	High	0	105.73	12	2
FALSE	Master Protein	GRMZM2G102596_P01 pep:known chromosome:AGPv3:9:18903400:18906316:1 gene:GRMZM2G102596 transcript:GRMZM2G102596_T01 description:"cdna	est omrna|protein"	51	11	24	11	1	280	30.1	5.67	14.849	High	0	105.7	11	0
FALSE	Master Protein	GRMZM2G008728_P02 pep:known chromosome:AGPv3:5:214550602:214553742:1 gene:GRMZM2G008728 transcript:GRMZM2G008728_T02 description:"cdna	est omrna|protein"	53	13	23	10	1	329	34.5	6.86	6.848	High	0	105.61	13	3
FALSE	Master Protein	GRMZM5G856738_P03	pep:known chromosome:AGPv3:3:217781063:217786144:-1 gene:GRMZM5G856738 transcript:GRMZM5G856738_T03 description:"est|mrna"	28	14	26	2	1	524	59.4	6.43	3.771	High	0	105.61	14	13
FALSE	Master Protein	GRMZM2G097043_P01	pep:known chromosome:AGPv3:4:194783112:194788847:-1 gene:GRMZM2G097043 transcript:GRMZM2G097043_T01 description:"est|mrna"	29	20	27	13	1	806	88.3	5.96	2.574	High	0	105.6	20	7
FALSE	Master Protein	GRMZM2G429000_P01 pep:known chromosome:AGPv3:10:138833997:138835213:-1 gene:GRMZM2G429000 transcript:GRMZM2G429000_T01 description:"cdna	est omrna|protein"	56	7	25	5	1	133	13.5	7.96	50.795	High	0	105.56	7	2
FALSE	Master Protein	GRMZM2G035502_P01 pep:known chromosome:AGPv3:6:34430158:34433252:1 gene:GRMZM2G035502 transcript:GRMZM2G035502_T01 description:"cdna	est omrna|protein"	54	10	25	4	1	214	23.4	5.45	10.659	High	0	105.53	10	0
FALSE	Master Protein	GRMZM2G043602_P01	pep:known chromosome:AGPv3:5:163152548:163158016:-1 gene:GRMZM2G043602 transcript:GRMZM2G043602_T01 description:"est|protein"	44	12	27	7	1	334	34.8	9.19	9	High	0	105.48	12	5
FALSE	Master Protein	GRMZM2G139786_P01 pep:novel chromosome:AGPv3:3:127533189:127534038:-1 gene:GRMZM2G139786 transcript:GRMZM2G139786_T01 description:"est	omrna protein"	53	10	21	10	1	224	24	4.81	12.895	High	0	105.46	10	0
FALSE	Master Protein	GRMZM2G368902_P01 pep:known chromosome:AGPv3:10:63625121:63632413:1 gene:GRMZM2G368902 transcript:GRMZM2G368902_T01 description:"cdna	est omrna|protein"	35	17	25	12	1	602	65.7	7.93	3.549	High	0	105.37	17	0
FALSE	Master Protein	GRMZM2G440208_P01 pep:known chromosome:AGPv3:4:18596164:18598086:-1 gene:GRMZM2G440208 transcript:GRMZM2G440208_T01 description:"cdna	est omrna|protein"	38	14	25	12	1	507	54.1	6.73	3.262	High	0	105.34	14	0
FALSE	Master Protein	GRMZM2G103430_P02 pep:known chromosome:AGPv3:4:38214151:38217818:-1 gene:GRMZM2G103430 transcript:GRMZM2G103430_T02 description:"cdna	est protein"	36	15	27	15	1	467	51.2	5.15	4.298	High	0	105.27	15	0
FALSE	Master Protein	GRMZM2G040164_P02 pep:known chromosome:AGPv3:7:139396307:139402124:-1 gene:GRMZM2G040164 transcript:GRMZM2G040164_T02 description:"cdna	est protein"	41	7	24	3	1	263	28.8	7.99	6.017	High	0	105.27	7	0
FALSE	Master Protein	GRMZM2G143651_P01 pep:known chromosome:AGPv3:5:215707063:215712278:1 gene:GRMZM2G143651 transcript:GRMZM2G143651_T01 description:"cdna	est omrna|protein"	32	12	26	12	1	460	50.2	9.55	2.981	High	0	105.21	12	0
FALSE	Master Protein	GRMZM2G024693_P01 pep:known chromosome:AGPv3:5:178845637:178855018:1 gene:GRMZM2G024693 transcript:GRMZM2G024693_T01 description:"cdna	est omrna|protein"	59	12	26	4	1	210	23	7.42	12.335	High	0	105.16	12	0
FALSE	Master Protein	GRMZM2G126261_P01 pep:known chromosome:AGPv3:7:172820457:172822288:1 gene:GRMZM2G126261 transcript:GRMZM2G126261_T01 description:"cdna	est omrna|protein"	37	6	21	5	1	321	33	5.77	14.199	High	0	104.95	6	0
FALSE	Master Protein	GRMZM2G371944_P01 pep:known chromosome:AGPv3:2:3089703:3094119:-1 gene:GRMZM2G371944 transcript:GRMZM2G371944_T01 description:"cdna	est omrna|protein"	57	13	25	6	1	299	32.5	5.86	5.579	High	0	104.86	13	7
FALSE	Master Protein	GRMZM2G087254_P01 pep:known chromosome:AGPv3:2:203181028:203184356:-1 gene:GRMZM2G087254 transcript:GRMZM2G087254_T01 description:"cdna	est omrna|protein"	32	13	26	2	1	456	49.5	8.15	3.894	High	0	104.76	13	0
FALSE	Master Protein	GRMZM2G084767_P01 pep:known chromosome:AGPv3:6:141471970:141476877:-1 gene:GRMZM2G084767 transcript:GRMZM2G084767_T01 description:"est	omrna protein"	25	18	26	7	1	870	95.7	4.72	2.008	High	0	104.71	18	9
FALSE	Master Protein	GRMZM2G113139_P01 pep:known chromosome:AGPv3:1:66581683:66586858:1 gene:GRMZM2G113139 transcript:GRMZM2G113139_T01 description:"cdna	est omrna"	36	23	27	14	1	743	80.7	4.67	3.024	High	0	104.71	23	9
FALSE	Master Protein	GRMZM2G083076_P03	pep:known chromosome:AGPv3:5:45467480:45473285:1 gene:GRMZM2G083076 transcript:GRMZM2G083076_T03 description:"est|protein"	31	12	26	5	1	385	43.7	5.29	5.579	High	0	104.6	12	7
FALSE	Master Protein	GRMZM2G302195_P02	pep:novel chromosome:AGPv3:8:146005131:146007601:1 gene:GRMZM2G302195 transcript:GRMZM2G302195_T02 description:"est|protein"	67	11	24	8	1	252	28.2	5.06	18.307	High	0	104.56	11	0
FALSE	Master Protein	GRMZM2G037204_P01	pep:known chromosome:AGPv3:4:151561245:151566069:1 gene:GRMZM2G037204 transcript:GRMZM2G037204_T01 description:"abinitio|est"	54	13	29	1	1	272	29.7	8.51	5.062	High	0	104.44	13	13
FALSE	Master Protein	GRMZM5G806622_P01	pep:known chromosome:AGPv3:8:170702664:170703955:1 gene:GRMZM5G806622 transcript:GRMZM5G806622_T01 description:"est"	21	7	29	4	1	343	35	9.67	2.36	High	0	104.28	7	3
FALSE	Master Protein	AC206968.3_FGP003	pep:known chromosome:AGPv3:2:46974105:46975385:-1 gene:AC206968.3_FG003 transcript:AC206968.3_FGT003 description:"abinitio"	46	16	23	4	1	426	47.6	5.85	4.623	High	0	104.17	16	12
FALSE	Master Protein	GRMZM2G566786_P03	pep:known chromosome:AGPv3:8:10072049:10076873:-1 gene:GRMZM2G566786 transcript:GRMZM2G566786_T03 description:"est"	50	13	25	12	1	343	39.2	5.59	9	High	0	104.05	13	1
FALSE	Master Protein	GRMZM2G050003_P01	pep:known chromosome:AGPv3:8:146524792:146529675:1 gene:GRMZM2G050003 transcript:GRMZM2G050003_T01 description:"est"	12	10	28	1	1	634	68.7	9.73	2.054	High	0	104.02	10	0
FALSE	Master Protein	GRMZM2G120304_P02 pep:known chromosome:AGPv3:3:31898899:31902299:-1 gene:GRMZM2G120304 transcript:GRMZM2G120304_T02 description:"est	omrna protein"	40	10	21	9	1	323	35.3	6.44	10.788	High	0	104.01	10	1
FALSE	Master Protein	GRMZM2G097728_P03 pep:known chromosome:AGPv3:5:191132656:191136724:1 gene:GRMZM2G097728 transcript:GRMZM2G097728_T03 description:"est	omrna protein"	73	13	29	1	1	203	22.5	5.71	9	High	0	103.86	13	0
FALSE	Master Protein	GRMZM2G020040_P02 pep:known chromosome:AGPv3:5:202107091:202115948:1 gene:GRMZM2G020040 transcript:GRMZM2G020040_T02 description:"abinitio	cdna est|omrna"	26	21	27	21	1	897	99	5.63	1.894	High	0	103.78	21	0
FALSE	Master Protein	GRMZM2G124466_P01 pep:known chromosome:AGPv3:10:146586522:146591112:1 gene:GRMZM2G124466 transcript:GRMZM2G124466_T01 description:"cdna	est omrna|protein"	54	12	24	5	1	299	32.8	7.21	6.197	High	0	103.64	12	0
FALSE	Master Protein	GRMZM2G122793_P01 pep:known chromosome:AGPv3:9:9969973:9974729:-1 gene:GRMZM2G122793 transcript:GRMZM2G122793_T01 description:"cdna	est omrna|protein"	51	9	24	9	1	152	16.7	8.25	27.48	High	0	103.56	9	0
FALSE	Master Protein	GRMZM2G394827_P03 pep:known chromosome:AGPv3:6:162073524:162075508:-1 gene:GRMZM2G394827 transcript:GRMZM2G394827_T03 description:"cdna	est protein"	47	10	27	6	1	156	17.6	11.46	25.102	High	0	103.44	10	4
FALSE	Master Protein	GRMZM2G150030_P01 pep:known chromosome:AGPv3:1:222176805:222179737:1 gene:GRMZM2G150030 transcript:GRMZM2G150030_T01 description:"cdna	est omrna|protein"	32	19	25	19	1	756	84.2	6.01	2.237	High	0	103.41	19	0
FALSE	Master Protein	GRMZM2G074857_P02 pep:known chromosome:AGPv3:8:3662122:3666192:1 gene:GRMZM2G074857 transcript:GRMZM2G074857_T02 description:"est	omrna protein"	47	15	23	15	1	368	39.5	8.16	6.305	High	0	103.4	15	0
FALSE	Master Protein	GRMZM6G700127_P01	pep:known chromosome:AGPv3:7:24751470:24753997:1 gene:GRMZM6G700127 transcript:GRMZM6G700127_T01 description:"cdna"	68	15	24	8	1	299	32.2	6.64	10.288	High	0	103.14	15	8
FALSE	Master Protein	GRMZM2G008714_P01 pep:known chromosome:AGPv3:10:147664124:147668582:1 gene:GRMZM2G008714 transcript:GRMZM2G008714_T01 description:"cdna	est omrna|protein"	28	16	26	2	1	609	65.7	8.87	2.075	High	0	103.13	16	13
FALSE	Master Protein	GRMZM2G095194_P01 pep:known chromosome:AGPv3:5:182500583:182506476:1 gene:GRMZM2G095194 transcript:GRMZM2G095194_T01 description:"est	omrna protein"	42	17	26	17	1	523	57	9.13	2.728	High	0	103.1	17	0
FALSE	Master Protein	GRMZM2G015033_P01 pep:known chromosome:AGPv3:5:107171167:107182269:1 gene:GRMZM2G015033 transcript:GRMZM2G015033_T01 description:"cdna	est omrna|protein"	34	6	24	6	1	285	30.5	7.91	10.938	High	0	102.6	6	0
FALSE	Master Protein	GRMZM2G146754_P01 pep:novel chromosome:AGPv3:4:79471725:79474955:1 gene:GRMZM2G146754 transcript:GRMZM2G146754_T01 description:"cdna	est omrna|protein"	77	9	23	3	1	190	21	4.81	17.738	High	0	102.56	9	0
FALSE	Master Protein	GRMZM2G150648_P04 pep:known chromosome:AGPv3:4:170547161:170550820:-1 gene:GRMZM2G150648 transcript:GRMZM2G150648_T04 description:"cdna	est protein"	44	14	25	11	1	308	32.3	10.14	11.589	High	0	102.46	14	3
FALSE	Master Protein	GRMZM2G030016_P02	pep:known chromosome:AGPv3:1:46131160:46133943:1 gene:GRMZM2G030016 transcript:GRMZM2G030016_T02 description:"est|protein"	64	12	27	7	1	192	22.2	9.74	34.112	High	0	102.43	12	5
FALSE	Master Protein	GRMZM2G018947_P01 pep:known chromosome:AGPv3:4:169017004:169020598:1 gene:GRMZM2G018947 transcript:GRMZM2G018947_T01 description:"cdna	est omrna|protein"	30	15	27	1	1	407	45.9	6.37	3.771	High	0	102.3	15	12
FALSE	Master Protein	GRMZM2G130230_P03 pep:known chromosome:AGPv3:2:37085409:37093417:-1 gene:GRMZM2G130230 transcript:GRMZM2G130230_T03 description:"est	omrna protein"	34	17	28	7	1	507	57.6	6.77	2.981	High	0	102.06	17	0
FALSE	Master Protein	GRMZM2G140051_P01 pep:known chromosome:AGPv3:9:19400367:19404521:-1 gene:GRMZM2G140051 transcript:GRMZM2G140051_T01 description:"cdna	est omrna|protein"	42	13	24	11	1	380	43.1	4.45	14.399	High	0	102.06	13	0
FALSE	Master Protein	GRMZM2G074898_P01 pep:known chromosome:AGPv3:5:19145071:19148243:1 gene:GRMZM2G074898 transcript:GRMZM2G074898_T01 description:"cdna	est protein"	35	9	26	1	1	161	18.3	10.71	67.129	High	0	101.96	9	8
FALSE	Master Protein	GRMZM2G124288_P02 pep:known chromosome:AGPv3:9:4832970:4841388:1 gene:GRMZM2G124288 transcript:GRMZM2G124288_T02 description:"cdna	est protein"	39	19	27	14	1	623	67.6	9.66	2.932	High	0	101.95	19	0
FALSE	Master Protein	GRMZM2G162663_P02 pep:known chromosome:AGPv3:5:167704907:167712548:1 gene:GRMZM2G162663 transcript:GRMZM2G162663_T02 description:"cdna	est omrna|protein"	30	18	27	11	1	706	78	5.67	2.665	High	0	101.94	18	0
FALSE	Master Protein	GRMZM2G110328_P03	pep:known chromosome:AGPv3:1:248178565:248181117:1 gene:GRMZM2G110328 transcript:GRMZM2G110328_T03 description:"est|protein"	35	9	26	1	1	161	18.3	10.71	67.129	High	0	101.93	9	0
FALSE	Master Protein	GRMZM2G080044_P01	pep:known chromosome:AGPv3:9:7620629:7626030:-1 gene:GRMZM2G080044 transcript:GRMZM2G080044_T01 description:"cdna|est"	34	13	25	13	1	545	59.3	7.69	3.101	High	0	101.86	13	0
FALSE	Master Protein	GRMZM2G302233_P01 pep:known chromosome:AGPv3:2:230338152:230345719:1 gene:GRMZM2G302233 transcript:GRMZM2G302233_T01 description:"cdna	est omrna"	28	17	27	17	1	653	71.9	6.73	2.888	High	0	101.85	17	0
FALSE	Master Protein	AC217401.3_FGP002	pep:known chromosome:AGPv3:1:264921042:264929904:-1 gene:AC217401.3_FG002 transcript:AC217401.3_FGT002 description:"est"	35	18	25	15	1	564	62.7	8.19	3.037	High	0	101.76	18	3
FALSE	Master Protein	GRMZM2G012966_P03 pep:known chromosome:AGPv3:8:138416903:138423947:1 gene:GRMZM2G012966 transcript:GRMZM2G012966_T03 description:"est	omrna protein"	32	13	25	13	1	537	59.7	6.73	3.894	High	0	101.75	13	0
FALSE	Master Protein	GRMZM2G078022_P03 pep:known chromosome:AGPv3:1:220945199:220950103:-1 gene:GRMZM2G078022 transcript:GRMZM2G078022_T03 description:"cdna	omrna protein"	36	7	24	3	1	211	22.6	4.49	11.589	High	0	101.72	7	4
FALSE	Master Protein	GRMZM2G035948_P01 pep:known chromosome:AGPv3:2:51726879:51729319:1 gene:GRMZM2G035948 transcript:GRMZM2G035948_T01 description:"cdna	est omrna|protein"	39	10	22	10	1	275	30.1	9.11	5.31	High	0	101.69	10	0
FALSE	Master Protein	GRMZM2G401308_P03 pep:known chromosome:AGPv3:7:11446208:11447698:-1 gene:GRMZM2G401308 transcript:GRMZM2G401308_T03 description:"cdna	est omrna|protein"	44	14	26	14	1	244	24.9	10.73	25.827	High	0	101.67	14	0
FALSE	Master Protein	GRMZM2G003157_P01 pep:known chromosome:AGPv3:4:237802001:237811856:1 gene:GRMZM2G003157 transcript:GRMZM2G003157_T01 description:"est	omrna protein"	33	20	25	20	1	672	74.5	7.15	2.529	High	0	101.63	20	0
FALSE	Master Protein	GRMZM2G003096_P01 pep:known chromosome:AGPv3:3:14343677:14346989:1 gene:GRMZM2G003096 transcript:GRMZM2G003096_T01 description:"cdna	est omrna|protein"	38	12	25	12	1	356	38.1	5.44	11.743	High	0	101.63	12	0
FALSE	Master Protein	GRMZM5G866223_P01	pep:known chromosome:AGPv3:Pt:113707:114249:-1 gene:GRMZM5G866223 transcript:GRMZM5G866223_T01 description:"protein"	37	6	26	6	1	180	21.1	6.86	11.328	High	0	101.56	6	0
FALSE	Master Protein	GRMZM2G036880_P01 pep:known chromosome:AGPv3:4:236369092:236370422:-1 gene:GRMZM2G036880 transcript:GRMZM2G036880_T01 description:"cdna	est omrna|protein"	17	6	29	3	1	249	26.6	6.79	20.544	High	0	101.51	6	0
FALSE	Master Protein	GRMZM2G589579_P01	pep:known chromosome:AGPv3:8:2511463:2518808:1 gene:GRMZM2G589579 transcript:GRMZM2G589579_T01 description:"est|mrna"	27	22	26	9	1	898	100.5	9	1.698	High	0	101.47	22	13
FALSE	Master Protein	GRMZM2G047042_P03 pep:known chromosome:AGPv3:3:96235646:96252055:1 gene:GRMZM2G047042 transcript:GRMZM2G047042_T03 description:"cdna	omrna protein"	36	12	23	12	1	384	42.8	9.23	3.962	High	0	101.41	12	0
FALSE	Master Protein	GRMZM2G106133_P02 pep:known chromosome:AGPv3:1:215379973:215381456:1 gene:GRMZM2G106133 transcript:GRMZM2G106133_T02 description:"cdna	est omrna|protein"	50	11	25	11	1	193	19.8	10.51	49.119	High	0	101.25	11	0
FALSE	Master Protein	GRMZM5G892758_P01	pep:novel chromosome:AGPv3:2:5844862:5849571:-1 gene:GRMZM5G892758 transcript:GRMZM5G892758_T01 description:"est|mrna"	24	15	23	5	1	722	79.3	6.76	1.976	High	0	101.23	15	0
FALSE	Master Protein	GRMZM2G133764_P01 pep:known chromosome:AGPv3:5:216791332:216796012:1 gene:GRMZM2G133764 transcript:GRMZM2G133764_T01 description:"cdna	est omrna|protein"	30	15	27	1	1	407	45.9	6.37	3.771	High	0	101.22	15	0
FALSE	Master Protein	GRMZM5G825524_P01	pep:known chromosome:AGPv3:1:289263282:289288561:1 gene:GRMZM5G825524 transcript:GRMZM5G825524_T01 description:"est|mrna"	31	20	26	4	1	803	90.7	5.45	1.837	High	0	101.16	20	16
FALSE	Master Protein	GRMZM2G309193_P01	pep:known chromosome:AGPv3:2:65632843:65646658:1 gene:GRMZM2G309193 transcript:GRMZM2G309193_T01 description:"protein"	28	6	23	1	1	247	27.2	10.24	5.813	High	0	101.13	6	0
FALSE	Master Protein	GRMZM2G020775_P01 pep:known chromosome:AGPv3:4:162708520:162718567:1 gene:GRMZM2G020775 transcript:GRMZM2G020775_T01 description:"cdna	est omrna|protein"	46	15	25	11	1	428	46.5	6.79	6.406	High	0	101.1	15	4
FALSE	Master Protein	GRMZM2G321725_P02 pep:known chromosome:AGPv3:9:147172664:147176848:-1 gene:GRMZM2G321725 transcript:GRMZM2G321725_T02 description:"cdna	est omrna|protein"	47	15	24	11	1	330	35.7	9.04	10.159	High	0	101.08	15	4
FALSE	Master Protein	GRMZM2G024354_P01 pep:known chromosome:AGPv3:7:8525160:8527464:-1 gene:GRMZM2G024354 transcript:GRMZM2G024354_T01 description:"cdna	est omrna|protein"	44	10	28	2	1	204	24.3	11.44	7.483	High	0	101.05	10	8
FALSE	Master Protein	GRMZM2G158024_P02 pep:known chromosome:AGPv3:8:70795031:70799184:-1 gene:GRMZM2G158024 transcript:GRMZM2G158024_T02 description:"est	omrna protein"	37	13	25	13	1	416	46.8	6.48	3.101	High	0	101.02	13	0
FALSE	Master Protein	GRMZM2G115049_P01	pep:known chromosome:AGPv3:6:161642062:161645447:1 gene:GRMZM2G115049 transcript:GRMZM2G115049_T01 description:"est"	35	8	21	8	1	276	29.2	8.12	10.788	High	0	100.9	8	0
FALSE	Master Protein	GRMZM2G141535_P01 pep:known chromosome:AGPv3:1:286519501:286527285:-1 gene:GRMZM2G141535 transcript:GRMZM2G141535_T01 description:"cdna	est omrna|protein"	16	21	27	12	1	1358	146.5	6.15	0.972	High	0	100.8	21	0
FALSE	Master Protein	GRMZM2G164948_P02 pep:known chromosome:AGPv3:5:202364165:202372147:-1 gene:GRMZM2G164948 transcript:GRMZM2G164948_T02 description:"cdna	est omrna"	60	11	20	10	1	331	34.8	6.02	10.788	High	0	100.8	11	1
FALSE	Master Protein	GRMZM2G151387_P01 pep:known chromosome:AGPv3:9:119964799:119970211:-1 gene:GRMZM2G151387 transcript:GRMZM2G151387_T01 description:"cdna	est omrna|protein"	35	22	26	13	1	732	80.2	4.6	2.938	High	0	100.73	22	0
FALSE	Master Protein	AC155622.2_FGP001	pep:known chromosome:AGPv3:3:4444110:4445303:-1 gene:AC155622.2_FG001 transcript:AC155622.2_FGT001 description:"abinitio"	43	14	24	8	1	397	43.7	5	6.406	High	0	100.7	14	0
FALSE	Master Protein	GRMZM2G701221_P01	pep:known chromosome:AGPv3:6:157013497:157022052:1 gene:GRMZM2G701221 transcript:GRMZM2G701221_T01 description:"est|mrna"	43	10	22	8	1	260	27.7	5.64	9	High	0	100.62	10	2
FALSE	Master Protein	GRMZM2G030167_P01 pep:known chromosome:AGPv3:8:147802116:147811408:1 gene:GRMZM2G030167 transcript:GRMZM2G030167_T01 description:"cdna	est omrna|protein"	68	15	26	3	1	230	26.6	7.01	12.335	High	0	100.61	15	0
FALSE	Master Protein	GRMZM2G058584_P01 pep:known chromosome:AGPv3:1:285195800:285200581:-1 gene:GRMZM2G058584 transcript:GRMZM2G058584_T01 description:"cdna	est omrna|protein"	32	15	25	15	1	476	51	6.39	4.736	High	0	100.53	15	0
FALSE	Master Protein	GRMZM5G854613_P01	pep:known chromosome:AGPv3:4:221610390:221616456:-1 gene:GRMZM5G854613 transcript:GRMZM5G854613_T01 description:"est"	32	12	26	9	1	407	44.5	8.79	5.813	High	0	100.53	12	4
FALSE	Master Protein	GRMZM2G066996_P01 pep:known chromosome:AGPv3:5:18473592:18476671:-1 gene:GRMZM2G066996 transcript:GRMZM2G066996_T01 description:"cdna	est omrna|protein"	41	14	23	12	1	397	42.1	5.82	4.248	High	0	100.43	14	2
FALSE	Master Protein	GRMZM2G019999_P01 pep:known chromosome:AGPv3:7:156059521:156065449:1 gene:GRMZM2G019999 transcript:GRMZM2G019999_T01 description:"abinitio	cdna est"	41	15	25	3	1	379	43.2	7.91	5.918	High	0	100.41	15	0
FALSE	Master Protein	GRMZM2G473463_P01 pep:known chromosome:AGPv3:5:167984269:167989231:-1 gene:GRMZM2G473463 transcript:GRMZM2G473463_T01 description:"cdna	est omrna|protein"	38	11	23	6	1	271	28.3	9.7	14.199	High	0	100.39	11	5
FALSE	Master Protein	GRMZM2G336908_P01 pep:known chromosome:AGPv3:8:116376809:116380944:-1 gene:GRMZM2G336908 transcript:GRMZM2G336908_T01 description:"cdna	est omrna|protein"	39	15	25	14	1	536	57.6	5.68	3.894	High	0	100.35	15	1
FALSE	Master Protein	GRMZM2G059151_P01 pep:known chromosome:AGPv3:6:115372536:115378936:-1 gene:GRMZM2G059151 transcript:GRMZM2G059151_T01 description:"cdna	est omrna|protein"	34	15	24	15	1	564	61	6.74	2.384	High	0	100.32	15	0
FALSE	Master Protein	GRMZM2G119146_P01 pep:known chromosome:AGPv3:9:115351180:115354729:-1 gene:GRMZM2G119146 transcript:GRMZM2G119146_T01 description:"cdna	est omrna|protein"	50	16	22	5	1	441	47	5.86	4.995	High	0	100.25	16	0
FALSE	Master Protein	GRMZM2G023748_P01	pep:known chromosome:AGPv3:3:176723510:176726585:-1 gene:GRMZM2G023748 transcript:GRMZM2G023748_T01 description:"cdna|est"	43	9	24	3	1	216	24.6	9.83	9	High	0	100.22	9	0
FALSE	Master Protein	GRMZM5G878070_P01	pep:known chromosome:AGPv3:6:136060576:136064381:1 gene:GRMZM5G878070 transcript:GRMZM5G878070_T01 description:"est|protein"	29	17	25	4	1	714	78.5	6.52	2.162	High	0	100.22	17	13
FALSE	Master Protein	GRMZM2G045090_P01 pep:known chromosome:AGPv3:1:79760351:79764442:-1 gene:GRMZM2G045090 transcript:GRMZM2G045090_T01 description:"est	omrna protein"	18	21	25	20	1	1256	136.7	6.05	1.179	High	0	100.21	21	1
FALSE	Master Protein	GRMZM2G169095_P01 pep:known chromosome:AGPv3:2:225001693:225013630:1 gene:GRMZM2G169095 transcript:GRMZM2G169095_T01 description:"cdna	est omrna|protein"	31	17	24	17	1	640	71.4	6.11	3.084	High	0	100.15	17	0
FALSE	Master Protein	GRMZM2G125310_P01 pep:known chromosome:AGPv3:2:82876071:82888218:1 gene:GRMZM2G125310 transcript:GRMZM2G125310_T01 description:"cdna	est omrna|protein"	45	10	24	10	1	222	25	7.12	5.661	High	0	100.1	10	0
FALSE	Master Protein	GRMZM2G316967_P01 pep:novel chromosome:AGPv3:3:35794787:35804261:-1 gene:GRMZM2G316967 transcript:GRMZM2G316967_T01 description:"abinitio	cdna est|omrna|protein"	24	21	26	15	1	1086	119.7	7.24	1.512	High	0	100.08	21	6
FALSE	Master Protein	GRMZM2G150098_P01 pep:known chromosome:AGPv3:2:1626662:1630749:1 gene:GRMZM2G150098 transcript:GRMZM2G150098_T01 description:"cdna	est omrna|protein"	31	15	25	1	1	513	55.3	8.18	2.621	High	0	100.05	15	0
FALSE	Master Protein	GRMZM2G077258_P03 pep:known chromosome:AGPv3:4:163422412:163427993:-1 gene:GRMZM2G077258 transcript:GRMZM2G077258_T03 description:"cdna	omrna protein"	38	14	26	14	1	503	56.6	8.44	3.52	High	0	100.04	14	0
FALSE	Master Protein	GRMZM2G104294_P01 pep:known chromosome:AGPv3:10:145490001:145511384:1 gene:GRMZM2G104294 transcript:GRMZM2G104294_T01 description:"cdna	est omrna|protein"	33	19	24	5	1	694	76.4	5.2	2.888	High	0	100	19	14
FALSE	Master Protein	GRMZM2G000256_P01 pep:known chromosome:AGPv3:8:143768356:143771611:1 gene:GRMZM2G000256 transcript:GRMZM2G000256_T01 description:"cdna	est omrna|protein"	31	9	24	6	1	303	34.2	9.2	5.813	High	0	99.91	9	3
FALSE	Master Protein	GRMZM2G104373_P01 pep:known chromosome:AGPv3:1:46547469:46551053:1 gene:GRMZM2G104373 transcript:GRMZM2G104373_T01 description:"cdna	est omrna|protein"	43	17	27	4	1	446	49.4	6.4	6.814	High	0	99.88	17	0
FALSE	Master Protein	GRMZM2G163233_P04 pep:known chromosome:AGPv3:2:205128528:205135718:1 gene:GRMZM2G163233 transcript:GRMZM2G163233_T04 description:"cdna	est protein"	39	15	25	3	1	452	51.4	7.62	4.012	High	0	99.74	15	13
FALSE	Master Protein	GRMZM2G124963_P01 pep:known chromosome:AGPv3:2:212180526:212185824:-1 gene:GRMZM2G124963 transcript:GRMZM2G124963_T01 description:"est	omrna protein"	39	10	23	8	1	330	36.8	5.96	5.31	High	0	99.73	10	0
FALSE	Master Protein	GRMZM2G081541_P01 pep:novel chromosome:AGPv3:10:14979906:14983519:1 gene:GRMZM2G081541 transcript:GRMZM2G081541_T01 description:"cdna	est omrna|protein"	30	14	24	4	1	597	66.4	6.71	2.594	High	0	99.66	14	10
FALSE	Master Protein	GRMZM2G051782_P01 pep:known chromosome:AGPv3:9:146557362:146563443:1 gene:GRMZM2G051782 transcript:GRMZM2G051782_T01 description:"cdna	est omrna|protein"	34	12	26	5	1	448	49.8	5.25	4.109	High	0	99.59	12	0
FALSE	Master Protein	GRMZM2G101617_P01 pep:known chromosome:AGPv3:3:187591019:187592591:-1 gene:GRMZM2G101617 transcript:GRMZM2G101617_T01 description:"cdna	est omrna|protein"	30	6	23	6	1	266	28.5	7.34	6.356	High	0	99.54	6	0
FALSE	Master Protein	GRMZM2G086464_P01 pep:known chromosome:AGPv3:8:106381499:106384436:-1 gene:GRMZM2G086464 transcript:GRMZM2G086464_T01 description:"cdna	est omrna|protein"	50	14	22	14	1	337	37.4	5.81	9	High	0	99.47	14	0
FALSE	Master Protein	GRMZM2G165176_P01 pep:known chromosome:AGPv3:3:139313219:139319473:-1 gene:GRMZM2G165176 transcript:GRMZM2G165176_T01 description:"abinitio	cdna est|omrna|protein"	27	12	23	3	1	606	64.9	8.69	4.179	High	0	99.44	12	0
FALSE	Master Protein	GRMZM5G803952_P03	pep:known chromosome:AGPv3:6:127556944:127559957:1 gene:GRMZM5G803952 transcript:GRMZM5G803952_T03 description:"cdna|est"	51	9	25	5	1	187	21.1	11.43	38.811	High	0	99.42	9	5
FALSE	Master Protein	GRMZM2G174619_P02 pep:known chromosome:AGPv3:6:112990139:112998614:-1 gene:GRMZM2G174619 transcript:GRMZM2G174619_T02 description:"cdna	est protein"	38	21	28	16	1	588	64.3	9.7	4.436	High	0	99.42	21	5
FALSE	Master Protein	GRMZM2G080048_P01 pep:known chromosome:AGPv3:7:173317057:173320874:-1 gene:GRMZM2G080048 transcript:GRMZM2G080048_T01 description:"cdna	est omrna|protein"	56	15	25	1	1	267	30.4	6.42	12.111	High	0	99.38	15	0
FALSE	Master Protein	GRMZM2G074037_P01	pep:known chromosome:AGPv3:9:92413442:92420203:1 gene:GRMZM2G074037 transcript:GRMZM2G074037_T01 description:"est|protein"	36	13	25	3	1	447	50.6	9.73	3.52	High	0	99.38	13	0
FALSE	Master Protein	GRMZM2G043878_P01 pep:known chromosome:AGPv3:1:41441065:41442219:-1 gene:GRMZM2G043878 transcript:GRMZM2G043878_T01 description:"cdna	est omrna|protein"	56	9	21	9	1	268	28.1	7.83	16.013	High	0	99.37	9	0
FALSE	Master Protein	GRMZM2G050647_P01 pep:known chromosome:AGPv3:10:115945143:115955403:1 gene:GRMZM2G050647 transcript:GRMZM2G050647_T01 description:"cdna	est omrna|protein"	24	24	26	6	1	1101	123	5.9	1.297	High	0	99.31	24	18
FALSE	Master Protein	GRMZM2G466780_P01	pep:known chromosome:AGPv3:3:179118224:179123201:-1 gene:GRMZM2G466780 transcript:GRMZM2G466780_T01 description:"cdna"	41	17	24	17	1	521	58.9	7.12	3.101	High	0	99.25	17	0
FALSE	Master Protein	GRMZM2G130095_P01 pep:known chromosome:AGPv3:1:167883378:167889702:1 gene:GRMZM2G130095 transcript:GRMZM2G130095_T01 description:"cdna	est omrna|protein"	30	16	26	16	1	508	54.2	5.43	5.31	High	0	99.21	16	0
FALSE	Master Protein	GRMZM5G887054_P01	pep:known chromosome:AGPv3:5:81191741:81194453:-1 gene:GRMZM5G887054 transcript:GRMZM5G887054_T01 description:"est"	42	10	28	4	1	207	24.1	11.31	128.155	High	0	99.19	10	9
FALSE	Master Protein	GRMZM2G704093_P02	pep:known chromosome:AGPv3:1:285707149:285718416:1 gene:GRMZM2G704093 transcript:GRMZM2G704093_T02 description:"est"	30	20	29	3	1	635	71.3	7.02	2.311	High	0	99.15	20	0
FALSE	Master Protein	GRMZM2G050193_P01	pep:known chromosome:AGPv3:2:196979616:196986363:-1 gene:GRMZM2G050193 transcript:GRMZM2G050193_T01 description:"est"	44	18	25	18	1	539	61	6.76	2.831	High	0	99.14	18	0
FALSE	Master Protein	GRMZM2G030646_P01 pep:known chromosome:AGPv3:2:217762119:217766498:-1 gene:GRMZM2G030646 transcript:GRMZM2G030646_T01 description:"cdna	est omrna|protein"	56	15	25	1	1	267	30.2	6.8	12.111	High	0	99.04	15	14
FALSE	Master Protein	GRMZM2G159369_P01 pep:known chromosome:AGPv3:6:126962678:126967338:1 gene:GRMZM2G159369 transcript:GRMZM2G159369_T01 description:"cdna	est omrna|protein"	40	18	27	14	1	366	40	6.73	5.21	High	0	98.9	18	4
FALSE	Master Protein	GRMZM2G109121_P02 pep:known chromosome:AGPv3:1:55290261:55298611:1 gene:GRMZM2G109121 transcript:GRMZM2G109121_T02 description:"cdna	est protein"	30	15	24	2	1	604	68.2	7.68	2.875	High	0	98.88	15	13
FALSE	Master Protein	GRMZM2G007715_P02	pep:novel chromosome:AGPv3:2:237576484:237585430:-1 gene:GRMZM2G007715 transcript:GRMZM2G007715_T02 description:"est"	29	10	22	1	1	454	50.2	9.01	1.807	High	0	98.85	10	0
FALSE	Master Protein	GRMZM2G044281_P03	pep:novel chromosome:AGPv3:1:41484792:41488160:1 gene:GRMZM2G044281 transcript:GRMZM2G044281_T03 description:"est|protein"	31	20	28	3	1	672	75.9	7.34	1.812	High	0	98.82	20	0
FALSE	Master Protein	GRMZM2G043336_P01 pep:novel chromosome:AGPv3:3:132181945:132183468:1 gene:GRMZM2G043336 transcript:GRMZM2G043336_T01 description:"cdna	est omrna|protein"	36	11	23	2	1	390	41.9	6.04	5.579	High	0	98.73	11	0
FALSE	Master Protein	GRMZM2G128995_P01 pep:known chromosome:AGPv3:8:77266793:77270611:1 gene:GRMZM2G128995 transcript:GRMZM2G128995_T01 description:"cdna	est omrna|protein"	46	15	25	3	1	377	42.6	5.96	4.055	High	0	98.71	15	0
FALSE	Master Protein	GRMZM2G178576_P02	pep:known chromosome:AGPv3:1:94688927:94693650:-1 gene:GRMZM2G178576 transcript:GRMZM2G178576_T02 description:"omrna|protein"	44	6	22	5	1	159	17.7	5.92	11.589	High	0	98.68	6	0
FALSE	Master Protein	GRMZM2G060054_P03	pep:novel chromosome:AGPv3:10:83681541:83697115:1 gene:GRMZM2G060054 transcript:GRMZM2G060054_T03 description:"est"	5	9	28	4	1	1898	212.5	9.23	0.314	High	0	98.66	9	6
FALSE	Master Protein	GRMZM2G013478_P01 pep:known chromosome:AGPv3:10:23254225:23259866:-1 gene:GRMZM2G013478 transcript:GRMZM2G013478_T01 description:"cdna	est omrna|protein"	48	10	24	10	1	222	24	9.29	9	High	0	98.57	10	0
FALSE	Master Protein	GRMZM2G169372_P01 pep:novel chromosome:AGPv3:1:259363954:259365311:-1 gene:GRMZM2G169372 transcript:GRMZM2G169372_T01 description:"cdna	omrna protein"	37	12	29	12	1	201	23	9.61	36.276	High	0	98.56	12	0
FALSE	Master Protein	GRMZM5G871297_P01	pep:known chromosome:AGPv3:2:234702024:234710811:-1 gene:GRMZM5G871297 transcript:GRMZM5G871297_T01 description:"est"	36	16	25	16	1	403	45.6	5.97	7.318	High	0	98.52	16	0
FALSE	Master Protein	GRMZM2G068316_P01 pep:known chromosome:AGPv3:10:18676121:18679398:1 gene:GRMZM2G068316 transcript:GRMZM2G068316_T01 description:"est	omrna protein"	38	11	24	11	1	237	25.3	4.82	10.788	High	0	98.47	11	0
FALSE	Master Protein	GRMZM2G101958_P01 pep:known chromosome:AGPv3:10:4168397:4169548:-1 gene:GRMZM2G101958 transcript:GRMZM2G101958_T01 description:"cdna	est omrna|protein"	49	4	21	2	1	121	11.7	8.9	30.623	High	0	98.44	4	0
FALSE	Master Protein	GRMZM2G053669_P01 pep:known chromosome:AGPv3:1:45118780:45122813:-1 gene:GRMZM2G053669 transcript:GRMZM2G053669_T01 description:"cdna	est omrna|protein"	31	13	21	6	1	588	66.1	6.24	2.398	High	0	98.42	13	7
FALSE	Master Protein	GRMZM2G174644_P01 pep:known chromosome:AGPv3:1:40226665:40231221:1 gene:GRMZM2G174644 transcript:GRMZM2G174644_T01 description:"cdna	est omrna|protein"	30	11	26	3	1	461	51.9	5.41	6.406	High	0	98.41	11	9
FALSE	Master Protein	GRMZM2G021816_P01 pep:known chromosome:AGPv3:1:197888037:197891456:-1 gene:GRMZM2G021816 transcript:GRMZM2G021816_T01 description:"cdna	est omrna|protein"	53	15	24	8	1	348	38.6	5.41	4.878	High	0	98.22	15	7
FALSE	Master Protein	GRMZM2G177912_P01 pep:known chromosome:AGPv3:3:230593870:230600153:1 gene:GRMZM2G177912 transcript:GRMZM2G177912_T01 description:"cdna	est protein"	39	12	22	3	1	377	42.6	5.64	3.507	High	0	98.2	12	0
FALSE	Master Protein	GRMZM2G085967_P01	pep:known chromosome:AGPv3:5:47607619:47611218:1 gene:GRMZM2G085967 transcript:GRMZM2G085967_T01 description:"protein"	36	9	22	9	1	328	35.4	7.66	4.179	High	0	98.13	9	0
FALSE	Master Protein	GRMZM2G073743_P03 pep:known chromosome:AGPv3:2:8505509:8508159:1 gene:GRMZM2G073743 transcript:GRMZM2G073743_T03 description:"cdna	est omrna|protein"	45	11	21	11	1	340	37.5	6.05	9	High	0	98.12	11	0
FALSE	Master Protein	GRMZM2G120857_P01 pep:known chromosome:AGPv3:8:2311933:2319535:-1 gene:GRMZM2G120857 transcript:GRMZM2G120857_T01 description:"cdna	est omrna|protein"	36	13	24	2	1	424	46.1	8.13	3.489	High	0	98.06	13	11
FALSE	Master Protein	GRMZM2G122937_P03 pep:known chromosome:AGPv3:2:23614588:23619319:1 gene:GRMZM2G122937 transcript:GRMZM2G122937_T03 description:"cdna	est omrna|protein"	71	18	26	17	1	199	21.8	5.87	13.125	High	0	97.95	18	0
FALSE	Master Protein	GRMZM2G172342_P01 pep:novel chromosome:AGPv3:7:95931073:95934163:-1 gene:GRMZM2G172342 transcript:GRMZM2G172342_T01 description:"cdna	est omrna|protein"	64	7	25	1	1	112	12.9	10.52	70.969	High	0	97.95	7	1
FALSE	Master Protein	GRMZM2G416667_P01 pep:known chromosome:AGPv3:6:140349675:140383003:-1 gene:GRMZM2G416667 transcript:GRMZM2G416667_T01 description:"cdna	est omrna|protein"	25	20	25	14	1	869	97.2	6.96	1.783	High	0	97.91	20	6
FALSE	Master Protein	GRMZM2G007647_P01 pep:known chromosome:AGPv3:5:183195023:183199704:1 gene:GRMZM2G007647 transcript:GRMZM2G007647_T01 description:"cdna	est omrna|protein"	27	11	24	5	1	486	52.4	8.66	2.039	High	0	97.81	11	0
FALSE	Master Protein	GRMZM2G169699_P04	pep:known chromosome:AGPv3:5:70002485:70006187:1 gene:GRMZM2G169699 transcript:GRMZM2G169699_T04 description:"est"	37	12	25	12	1	379	42.5	6.81	4.248	High	0	97.7	12	0
FALSE	Master Protein	GRMZM6G741620_P02	pep:known chromosome:AGPv3:8:102023146:102024983:-1 gene:GRMZM6G741620 transcript:GRMZM6G741620_T01 description:"cdna"	48	7	20	1	1	140	15	5.52	55.234	High	0	97.66	7	0
FALSE	Master Protein	GRMZM2G046587_P02 pep:known chromosome:AGPv3:5:200881599:200885159:-1 gene:GRMZM2G046587 transcript:GRMZM2G046587_T02 description:"est	omrna protein"	71	13	26	9	1	206	23.5	5.83	19.309	High	0	97.66	13	4
FALSE	Master Protein	GRMZM2G153162_P01 pep:known chromosome:AGPv3:7:156607922:156615847:1 gene:GRMZM2G153162 transcript:GRMZM2G153162_T01 description:"abinitio	cdna est|omrna|protein"	26	21	25	10	1	1005	111.3	6.33	1.231	High	0	97.64	21	11
FALSE	Master Protein	GRMZM2G084540_P01 pep:known chromosome:AGPv3:1:65226637:65231842:-1 gene:GRMZM2G084540 transcript:GRMZM2G084540_T01 description:"est	omrna protein"	45	19	24	9	1	541	57.8	7.31	3.354	High	0	97.53	19	10
FALSE	Master Protein	GRMZM2G013783_P01 pep:known chromosome:AGPv3:1:48681403:48686458:-1 gene:GRMZM2G013783 transcript:GRMZM2G013783_T01 description:"cdna	est omrna|protein"	27	11	20	8	1	567	61.7	7.03	2.162	High	0	97.52	11	3
FALSE	Master Protein	GRMZM2G013798_P01 pep:known chromosome:AGPv3:6:160965405:160969416:-1 gene:GRMZM2G013798 transcript:GRMZM2G013798_T01 description:"est	mrna protein"	44	13	27	13	1	286	32.7	10.1	7.859	High	0	97.49	13	0
FALSE	Master Protein	GRMZM2G070487_P03 pep:known chromosome:AGPv3:8:19513682:19520971:1 gene:GRMZM2G070487 transcript:GRMZM2G070487_T03 description:"cdna	est protein"	19	16	25	2	1	742	86.8	9.39	1.56	High	0	97.45	16	0
FALSE	Master Protein	GRMZM5G853305_P01	pep:known chromosome:AGPv3:Pt:79519:79881:-1 gene:GRMZM5G853305 transcript:GRMZM5G853305_T01 description:"protein"	62	6	21	6	1	120	13.5	10.93	25.827	High	0	97.43	6	0
FALSE	Master Protein	GRMZM2G044060_P01 pep:known chromosome:AGPv3:7:3000577:3011032:-1 gene:GRMZM2G044060 transcript:GRMZM2G044060_T01 description:"cdna	est omrna|protein"	29	19	23	19	1	755	82.4	5.45	1.861	High	0	97.42	19	0
FALSE	Master Protein	GRMZM2G031859_P01	pep:known chromosome:AGPv3:1:6236684:6246244:-1 gene:GRMZM2G031859 transcript:GRMZM2G031859_T01 description:"cdna|est"	33	23	25	23	1	935	104.6	6.84	1.963	High	0	97.42	23	0
FALSE	Master Protein	GRMZM2G026980_P01 pep:known chromosome:AGPv3:5:53934855:53936718:1 gene:GRMZM2G026980 transcript:GRMZM2G026980_T01 description:"cdna	est omrna|protein"	31	9	23	9	1	377	41.8	9.33	6.197	High	0	97.42	9	0
FALSE	Master Protein	GRMZM2G044684_P01 pep:known chromosome:AGPv3:4:136963381:136966710:1 gene:GRMZM2G044684 transcript:GRMZM2G044684_T01 description:"cdna	est omrna|protein"	39	12	25	7	1	328	36.1	4.64	7.799	High	0	97.32	12	5
FALSE	Master Protein	GRMZM2G045987_P01 pep:known chromosome:AGPv3:4:17109875:17119539:1 gene:GRMZM2G045987 transcript:GRMZM2G045987_T01 description:"cdna	est omrna|protein"	24	14	21	13	1	791	86.3	6.02	2.384	High	0	97.15	14	1
FALSE	Master Protein	GRMZM2G083173_P01 pep:known chromosome:AGPv3:1:84423232:84427855:1 gene:GRMZM2G083173 transcript:GRMZM2G083173_T01 description:"cdna	est omrna|protein"	25	13	26	13	1	747	79.5	4.93	4.623	High	0	97.14	13	0
FALSE	Master Protein	GRMZM2G106960_P01 pep:known chromosome:AGPv3:8:136938104:136941568:-1 gene:GRMZM2G106960 transcript:GRMZM2G106960_T01 description:"abinitio	cdna est|omrna|protein"	51	10	27	4	1	203	22.5	5.27	6.743	High	0	97.14	10	1
FALSE	Master Protein	GRMZM2G011070_P01 pep:known scaffold:AGPv3:scaffold_507:699679:715900:1 gene:GRMZM2G011070 transcript:GRMZM2G011070_T01 description:"cdna	est omrna"	24	23	24	21	1	1221	135	5.73	1.34	High	0	97.05	23	2
FALSE	Master Protein	GRMZM2G463280_P02 pep:known chromosome:AGPv3:2:12904879:12907102:1 gene:GRMZM2G463280 transcript:GRMZM2G463280_T02 description:"cdna	est omrna|protein"	44	11	21	11	1	381	42.2	6.7	4.78	High	0	96.99	11	0
FALSE	Master Protein	GRMZM2G010868_P01 pep:known chromosome:AGPv3:3:230694240:230696031:-1 gene:GRMZM2G010868 transcript:GRMZM2G010868_T01 description:"abinitio	cdna est|omrna|protein"	54	6	23	4	1	121	11.7	8.91	67.129	High	0	96.97	6	2
FALSE	Master Protein	GRMZM2G129208_P03	pep:known chromosome:AGPv3:2:111834887:111836733:-1 gene:GRMZM2G129208 transcript:GRMZM2G129208_T03 description:"est"	43	7	19	5	1	233	24.6	7.81	12.895	High	0	96.84	7	0
FALSE	Master Protein	GRMZM2G000823_P01	pep:novel chromosome:AGPv3:1:12143635:12148243:1 gene:GRMZM2G000823 transcript:GRMZM2G000823_T01 description:"est"	35	17	25	17	1	468	51.7	5.64	5.21	High	0	96.75	17	0
FALSE	Master Protein	GRMZM2G095326_P01	pep:known chromosome:AGPv3:4:186835882:186886262:-1 gene:GRMZM2G095326 transcript:GRMZM2G095326_T01 description:"oprotein"	15	21	24	21	1	1684	185.2	6.55	0.719	High	0	96.73	21	0
FALSE	Master Protein	GRMZM2G111579_P01 pep:known chromosome:AGPv3:6:24549311:24554370:-1 gene:GRMZM2G111579 transcript:GRMZM2G111579_T01 description:"cdna	est omrna|protein"	35	16	27	16	1	503	56.9	6.89	5.404	High	0	96.72	16	0
FALSE	Master Protein	GRMZM2G052088_P01 pep:known chromosome:AGPv3:3:221368481:221372574:-1 gene:GRMZM2G052088 transcript:GRMZM2G052088_T01 description:"cdna	est omrna|protein"	37	12	23	9	1	351	40.7	4.96	10.365	High	0	96.58	12	3
FALSE	Master Protein	GRMZM2G142873_P01 pep:known chromosome:AGPv3:7:117734381:117741648:-1 gene:GRMZM2G142873 transcript:GRMZM2G142873_T01 description:"cdna	est omrna|protein"	40	17	26	16	1	529	56.9	8.56	4.179	High	0	96.56	17	1
FALSE	Master Protein	GRMZM6G869379_P02	pep:known chromosome:AGPv3:5:76240652:76243338:1 gene:GRMZM6G869379 transcript:GRMZM6G869379_T01 description:"est cdna"	44	10	23	9	1	274	30	5.27	10.659	High	0	96.51	10	1
FALSE	Master Protein	GRMZM5G896082_P02	pep:known chromosome:AGPv3:1:299638885:299645499:-1 gene:GRMZM5G896082 transcript:GRMZM5G896082_T02 description:"est"	31	9	22	8	1	322	36.1	5.35	5.494	High	0	96.42	9	0
FALSE	Master Protein	GRMZM2G086489_P01 pep:known chromosome:AGPv3:2:4629897:4642690:1 gene:GRMZM2G086489 transcript:GRMZM2G086489_T01 description:"cdna	est omrna|protein"	29	17	23	3	1	694	76.4	5.16	2.44	High	0	96.42	17	0
FALSE	Master Protein	GRMZM2G126120_P01 pep:known chromosome:AGPv3:9:119190370:119195585:-1 gene:GRMZM2G126120 transcript:GRMZM2G126120_T01 description:"cdna	est omrna|protein"	46	19	23	9	1	543	58.1	7.34	3.084	High	0	96.4	19	0
FALSE	Master Protein	GRMZM2G084868_P02	pep:known chromosome:AGPv3:4:51745820:51747254:-1 gene:GRMZM2G084868 transcript:GRMZM2G084868_T02 description:"est|mrna"	52	7	25	1	1	108	12	10.59	67.129	High	0	96.37	7	0
FALSE	Master Protein	GRMZM2G156630_P03 pep:known chromosome:AGPv3:3:144447439:144450357:-1 gene:GRMZM2G156630 transcript:GRMZM2G156630_T03 description:"cdna	est omrna|protein"	35	13	22	4	1	394	43	8.05	5.7	High	0	96.33	13	9
FALSE	Master Protein	GRMZM5G895313_P01	pep:known chromosome:AGPv3:10:143487131:143488239:1 gene:GRMZM5G895313 transcript:GRMZM5G895313_T01 description:"cdna|est"	77	10	22	10	1	208	20.2	6.34	7.577	High	0	96.3	10	0
FALSE	Master Protein	GRMZM2G135108_P01 pep:known chromosome:AGPv3:6:125194486:125196087:1 gene:GRMZM2G135108 transcript:GRMZM2G135108_T01 description:"cdna	est omrna|protein"	18	6	28	1	1	360	38.6	6.96	2.548	High	0	96.3	6	0
FALSE	Master Protein	GRMZM2G178415_P06	pep:known chromosome:AGPv3:1:287361405:287364852:-1 gene:GRMZM2G178415 transcript:GRMZM2G178415_T06 description:"omrna|protein"	46	15	23	12	1	411	44	6.39	5.422	High	0	96.29	15	3
FALSE	Master Protein	GRMZM5G892742_P04	pep:known chromosome:AGPv3:4:18709241:18717139:-1 gene:GRMZM5G892742 transcript:GRMZM5G892742_T04 description:"est|mrna"	41	14	22	14	1	456	49.8	6.96	2.981	High	0	96.25	14	0
FALSE	Master Protein	GRMZM2G109472_P03 pep:known chromosome:AGPv3:8:157653408:157663852:-1 gene:GRMZM2G109472 transcript:GRMZM2G109472_T03 description:"abinitio	est protein"	12	12	25	10	1	1052	115.3	7.97	0.874	High	0	96.25	12	2
FALSE	Master Protein	GRMZM2G067265_P02 pep:known chromosome:AGPv3:7:124898574:124903875:1 gene:GRMZM2G067265 transcript:GRMZM2G067265_T02 description:"cdna	est omrna|protein"	30	11	22	11	1	493	53.6	6.55	3.365	High	0	96.22	11	0
FALSE	Master Protein	GRMZM2G102858_P01	pep:known chromosome:AGPv3:9:90601515:90612652:1 gene:GRMZM2G102858 transcript:GRMZM2G102858_T01 description:"est|mrna"	31	14	22	4	1	587	65.5	5.03	2.728	High	0	96.19	14	0
FALSE	Master Protein	GRMZM2G068862_P01 pep:known chromosome:AGPv3:7:132189772:132195015:1 gene:GRMZM2G068862 transcript:GRMZM2G068862_T01 description:"cdna	est omrna|protein"	24	9	23	9	1	401	44.2	8.63	2.831	High	0	96.07	9	0
FALSE	Master Protein	GRMZM5G844562_P01	pep:known chromosome:AGPv3:5:99030278:99034633:-1 gene:GRMZM5G844562 transcript:GRMZM5G844562_T01 description:"cdna|mrna"	38	10	22	10	1	367	38.7	6.39	6.079	High	0	96.05	10	0
FALSE	Master Protein	GRMZM2G460860_P01 pep:known chromosome:AGPv3:3:186840260:186841796:-1 gene:GRMZM2G460860 transcript:GRMZM2G460860_T01 description:"est	omrna protein"	14	5	27	2	1	342	35.1	9.72	2.162	High	0	95.94	5	0
FALSE	Master Protein	GRMZM2G173878_P01 pep:known chromosome:AGPv3:10:124319406:124322173:1 gene:GRMZM2G173878 transcript:GRMZM2G173878_T01 description:"cdna	est omrna|protein"	54	12	22	4	1	210	23	7.42	14.399	High	0	95.94	12	8
FALSE	Master Protein	GRMZM2G128171_P02 pep:known chromosome:AGPv3:3:64461075:64464396:1 gene:GRMZM2G128171 transcript:GRMZM2G128171_T02 description:"cdna	est protein"	51	16	25	12	1	367	40.1	6.23	4.623	High	0	95.93	16	0
FALSE	Master Protein	GRMZM2G145972_P02 pep:known chromosome:AGPv3:4:35243107:35249049:1 gene:GRMZM2G145972 transcript:GRMZM2G145972_T02 description:"cdna	est omrna|protein"	31	16	24	16	1	577	64.7	8.06	2.765	High	0	95.92	16	0
FALSE	Master Protein	AC234091.1_FGP001	pep:novel chromosome:AGPv3:2:119321954:119325349:-1 gene:AC234091.1_FG001 transcript:AC234091.1_FGT001 description:"abinitio"	26	15	21	13	1	775	83.3	7.74	1.442	High	0	95.77	15	2
FALSE	Master Protein	GRMZM2G025366_P01 pep:known chromosome:AGPv3:10:125352521:125356410:-1 gene:GRMZM2G025366 transcript:GRMZM2G025366_T01 description:"cdna	est omrna|protein"	41	12	24	4	1	377	40.5	7.2	10.45	High	0	95.62	12	8
FALSE	Master Protein	GRMZM2G103287_P01 pep:known chromosome:AGPv3:10:70234927:70240656:-1 gene:GRMZM2G103287 transcript:GRMZM2G103287_T01 description:"cdna	est omrna|protein"	53	14	25	5	1	332	36.6	6.7	9	High	0	95.61	14	7
FALSE	Master Protein	GRMZM2G142097_P02 pep:known chromosome:AGPv3:1:295348943:295351317:-1 gene:GRMZM2G142097 transcript:GRMZM2G142097_T02 description:"cdna	est omrna|protein"	47	9	24	9	1	165	17.8	9.95	22.101	High	0	95.29	9	0
FALSE	Master Protein	GRMZM2G177412_P02 pep:known chromosome:AGPv3:10:144042895:144046169:-1 gene:GRMZM2G177412 transcript:GRMZM2G177412_T02 description:"cdna	est omrna|protein"	35	20	25	20	1	531	57.9	8.81	3.084	High	0	95.14	20	0
FALSE	Master Protein	GRMZM2G080603_P04	pep:known chromosome:AGPv3:1:178503735:178504743:-1 gene:GRMZM2G080603 transcript:GRMZM2G080603_T04 description:"abinitio|omrna"	55	7	25	7	1	155	15.4	6.55	26.826	High	0	95.11	7	0
FALSE	Master Protein	GRMZM2G059991_P01	pep:known chromosome:AGPv3:6:136070517:136074741:1 gene:GRMZM2G059991 transcript:GRMZM2G059991_T01 description:"est"	46	9	22	1	1	235	25.6	7.71	16.013	High	0	94.96	9	8
FALSE	Master Protein	GRMZM2G065083_P01	pep:known chromosome:AGPv3:1:283156653:283159112:1 gene:GRMZM2G065083 transcript:GRMZM2G065083_T01 description:"cdna"	54	9	24	9	1	209	23.1	6.73	13.251	High	0	94.94	9	0
FALSE	Master Protein	GRMZM2G031311_P02 pep:known chromosome:AGPv3:6:133839861:133843446:1 gene:GRMZM2G031311 transcript:GRMZM2G031311_T02 description:"cdna	est omrna|protein"	22	15	26	3	1	676	76.1	6.83	1.622	High	0	94.92	15	2
FALSE	Master Protein	GRMZM2G038013_P01 pep:novel chromosome:AGPv3:10:148969561:148970286:1 gene:GRMZM2G038013 transcript:GRMZM2G038013_T01 description:"cdna	est omrna|protein"	17	3	26	3	1	132	14.9	10.18	9	High	0	94.81	3	0
FALSE	Master Protein	GRMZM5G885628_P02	pep:novel chromosome:AGPv3:1:61021667:61024477:-1 gene:GRMZM5G885628 transcript:GRMZM5G885628_T02 description:"est"	40	10	22	1	1	448	48.7	4.61	6.743	High	0	94.74	10	0
FALSE	Master Protein	GRMZM2G477879_P01 pep:novel chromosome:AGPv3:1:269990792:269993014:1 gene:GRMZM2G477879 transcript:GRMZM2G477879_T01 description:"abinitio	est omrna"	49	14	24	2	1	297	32.7	8.32	6.943	High	0	94.7	14	0
FALSE	Master Protein	GRMZM2G017249_P01 pep:known chromosome:AGPv3:5:74670508:74672296:-1 gene:GRMZM2G017249 transcript:GRMZM2G017249_T01 description:"est	omrna protein"	36	13	22	13	1	574	63.6	4.44	2.275	High	0	94.6	13	0
FALSE	Master Protein	GRMZM2G074103_P01 pep:known chromosome:AGPv3:8:25348196:25355005:-1 gene:GRMZM2G074103 transcript:GRMZM2G074103_T01 description:"abinitio	cdna est|omrna"	22	14	23	14	1	762	84.4	7.3	2.57	High	0	94.57	14	0
FALSE	Master Protein	GRMZM2G304362_P01 pep:novel chromosome:AGPv3:9:15984255:15989534:1 gene:GRMZM2G304362 transcript:GRMZM2G304362_T01 description:"cdna	est omrna|protein"	26	17	23	4	1	815	91.7	6.95	1.371	High	0	94.57	17	13
FALSE	Master Protein	GRMZM2G180909_P01 pep:known chromosome:AGPv3:1:94881328:94884787:1 gene:GRMZM2G180909 transcript:GRMZM2G180909_T01 description:"cdna	est omrna|protein"	47	16	21	5	1	448	47.9	5.44	4.623	High	0	94.57	16	11
FALSE	Master Protein	GRMZM2G048324_P01 pep:known chromosome:AGPv3:1:70432377:70436980:1 gene:GRMZM2G048324 transcript:GRMZM2G048324_T01 description:"cdna	est omrna|protein"	32	19	25	18	1	569	63.3	4.87	3.084	High	0	94.49	19	0
FALSE	Master Protein	GRMZM2G018484_P01 pep:known chromosome:AGPv3:5:213327972:213330152:1 gene:GRMZM2G018484 transcript:GRMZM2G018484_T01 description:"est	omrna protein"	25	13	22	13	1	538	59.4	8.38	2.765	High	0	94.48	13	0
FALSE	Master Protein	GRMZM2G047720_P01 pep:known chromosome:AGPv3:6:117286818:117288287:-1 gene:GRMZM2G047720 transcript:GRMZM2G047720_T01 description:"cdna	est omrna|protein"	20	5	21	5	1	148	15.9	8.98	15.681	High	0	94.44	5	0
FALSE	Master Protein	GRMZM2G168330_P02	pep:known chromosome:AGPv3:7:147169506:147171150:-1 gene:GRMZM2G168330 transcript:GRMZM2G168330_T02 description:"est"	58	12	28	3	1	134	15.4	10.35	76.426	High	0	94.41	12	10
FALSE	Master Protein	GRMZM2G134480_P01 pep:known chromosome:AGPv3:7:174785186:174790941:1 gene:GRMZM2G134480 transcript:GRMZM2G134480_T01 description:"cdna	est omrna|protein"	18	17	25	11	1	1050	116.4	5.64	1.239	High	0	94.4	17	1
FALSE	Master Protein	GRMZM2G008263_P02 pep:known chromosome:AGPv3:7:34885173:34892432:-1 gene:GRMZM2G008263 transcript:GRMZM2G008263_T02 description:"cdna	est omrna|protein"	22	12	22	12	1	609	66.8	6.48	3.101	High	0	94.32	12	0
FALSE	Master Protein	GRMZM2G014914_P02	pep:novel chromosome:AGPv3:7:41435361:41438812:-1 gene:GRMZM2G014914 transcript:GRMZM2G014914_T02 description:"est"	23	5	22	2	1	316	33.3	7.77	4.623	High	0	94.31	5	3
FALSE	Master Protein	GRMZM2G413652_P01 pep:known chromosome:AGPv3:8:70041131:70044614:1 gene:GRMZM2G413652 transcript:GRMZM2G413652_T01 description:"cdna	est omrna"	40	10	22	10	1	278	29.9	6.44	6.499	High	0	94.3	10	0
FALSE	Master Protein	GRMZM2G016254_P02	pep:known chromosome:AGPv3:10:83108498:83111007:-1 gene:GRMZM2G016254 transcript:GRMZM2G016254_T02 description:"cdna"	38	17	22	17	1	554	64.1	5.55	2.162	High	0	94.2	17	0
FALSE	Master Protein	GRMZM2G158627_P03	pep:known chromosome:AGPv3:6:96843469:96849281:-1 gene:GRMZM2G158627 transcript:GRMZM2G158627_T03 description:"est|mrna"	36	17	23	8	1	466	52.8	6.55	3.758	High	0	94.18	17	0
FALSE	Master Protein	GRMZM2G014558_P01 pep:known chromosome:AGPv3:7:130735393:130740508:-1 gene:GRMZM2G014558 transcript:GRMZM2G014558_T01 description:"cdna	est protein"	28	16	23	15	1	727	81.9	7.36	1.485	High	0	94.09	16	0
FALSE	Master Protein	GRMZM2G057608_P04	pep:novel chromosome:AGPv3:1:204725772:204727783:-1 gene:GRMZM2G057608 transcript:GRMZM2G057608_T04 description:"est|protein"	52	7	24	1	1	108	12	10.59	67.129	High	0	94.06	7	6
FALSE	Master Protein	GRMZM2G122999_P01	pep:known chromosome:AGPv3:3:129245933:129252692:1 gene:GRMZM2G122999 transcript:GRMZM2G122999_T01 description:"cdna|est"	24	13	25	8	1	584	63.8	6.33	2.268	High	0	94.04	13	5
FALSE	Master Protein	GRMZM2G133121_P01 pep:known chromosome:AGPv3:3:4635490:4641814:1 gene:GRMZM2G133121 transcript:GRMZM2G133121_T01 description:"cdna	est omrna"	28	15	23	15	1	634	68.7	7.05	2.36	High	0	93.96	15	0
FALSE	Master Protein	GRMZM2G001297_P01	pep:known chromosome:AGPv3:2:217350439:217356268:1 gene:GRMZM2G001297 transcript:GRMZM2G001297_T01 description:"cdna|est"	23	16	22	16	1	841	93.2	8.53	1.488	High	0	93.89	16	0
FALSE	Master Protein	GRMZM2G048497_P01 pep:known chromosome:AGPv3:5:217060968:217062964:1 gene:GRMZM2G048497 transcript:GRMZM2G048497_T01 description:"cdna	est omrna|protein"	39	11	24	11	1	380	38.3	9.28	4.995	High	0	93.89	11	0
FALSE	Master Protein	GRMZM2G469969_P01	pep:known chromosome:AGPv3:2:146649171:146653569:1 gene:GRMZM2G469969 transcript:GRMZM2G469969_T01 description:"est|mrna"	38	18	24	18	1	586	65.8	7.83	2.065	High	0	93.82	18	0
FALSE	Master Protein	GRMZM2G117300_P01 pep:known chromosome:AGPv3:2:154033893:154036450:1 gene:GRMZM2G117300 transcript:GRMZM2G117300_T01 description:"cdna	est omrna|protein"	57	10	22	7	1	291	31.2	8.6	5.661	High	0	93.8	10	0
FALSE	Master Protein	GRMZM2G153569_P03	pep:known chromosome:AGPv3:8:111673738:111676379:-1 gene:GRMZM2G153569 transcript:GRMZM2G153569_T03 description:"est"	31	6	23	1	1	229	24.8	4.55	13.251	High	0	93.72	6	0
FALSE	Master Protein	GRMZM2G024933_P02	pep:novel chromosome:AGPv3:2:71740629:71768626:1 gene:GRMZM2G024933 transcript:GRMZM2G024933_T02 description:"est"	55	7	23	6	1	157	17.1	5.21	16.783	High	0	93.7	7	0
FALSE	Master Protein	GRMZM2G044132_P01 pep:known chromosome:AGPv3:2:54473360:54474872:1 gene:GRMZM2G044132 transcript:GRMZM2G044132_T01 description:"cdna	est omrna|protein"	64	13	22	13	1	269	27.8	5.25	7.859	High	0	93.67	13	0
FALSE	Master Protein	GRMZM2G108285_P01 pep:known chromosome:AGPv3:7:155598887:155602061:1 gene:GRMZM2G108285 transcript:GRMZM2G108285_T01 description:"cdna	est protein"	56	11	21	7	1	219	25.4	5	12.594	High	0	93.65	11	4
FALSE	Master Protein	GRMZM2G010221_P01 pep:known chromosome:AGPv3:4:236268174:236272709:-1 gene:GRMZM2G010221 transcript:GRMZM2G010221_T01 description:"cdna	est protein"	29	17	24	17	1	572	64.2	7.97	2.065	High	0	93.63	17	0
FALSE	Master Protein	GRMZM2G174481_P01 pep:known chromosome:AGPv3:4:238978289:238981287:-1 gene:GRMZM2G174481 transcript:GRMZM2G174481_T01 description:"cdna	est omrna|protein"	34	9	21	9	1	311	34.6	6.46	6.627	High	0	93.63	9	0
FALSE	Master Protein	GRMZM2G126019_P01	pep:known chromosome:AGPv3:1:268218423:268232042:1 gene:GRMZM2G126019 transcript:GRMZM2G126019_T01 description:"cdna|est"	37	20	24	17	1	611	68	8.24	2.44	High	0	93.55	20	2
FALSE	Master Protein	GRMZM5G856881_P01	pep:known chromosome:AGPv3:3:170159124:170162114:-1 gene:GRMZM5G856881 transcript:GRMZM5G856881_T01 description:"est"	55	11	23	5	1	298	32.9	8.15	6.848	High	0	93.44	11	6
FALSE	Master Protein	GRMZM2G167932_P01 pep:known chromosome:AGPv3:7:162295212:162299185:1 gene:GRMZM2G167932 transcript:GRMZM2G167932_T01 description:"cdna	est omrna"	24	9	19	9	1	444	49	5.27	2.899	High	0	93.37	9	0
FALSE	Master Protein	GRMZM2G007441_P01 pep:known chromosome:AGPv3:1:7308073:7309722:-1 gene:GRMZM2G007441 transcript:GRMZM2G007441_T01 description:"est	omrna protein"	34	10	21	10	1	426	46.3	4.86	2.631	High	0	93.33	10	0
FALSE	Master Protein	GRMZM2G025954_P01 pep:known chromosome:AGPv3:8:127308606:127310038:-1 gene:GRMZM2G025954 transcript:GRMZM2G025954_T01 description:"cdna	est omrna|protein"	46	7	24	2	1	201	21	8.66	10.938	High	0	93.24	7	6
FALSE	Master Protein	GRMZM2G137151_P01 pep:known chromosome:AGPv3:6:146570761:146575010:-1 gene:GRMZM2G137151 transcript:GRMZM2G137151_T01 description:"cdna	est protein"	19	11	23	11	1	719	77.2	7.49	1.865	High	0	93.24	11	0
FALSE	Master Protein	GRMZM2G326643_P01 pep:known chromosome:AGPv3:1:116022594:116097635:1 gene:GRMZM2G326643 transcript:GRMZM2G326643_T01 description:"cdna	est omrna|protein"	12	18	22	13	1	1924	220.4	8.57	0.423	High	0	93.14	18	5
FALSE	Master Protein	GRMZM2G003318_P01 pep:known chromosome:AGPv3:1:101275733:101279519:1 gene:GRMZM2G003318 transcript:GRMZM2G003318_T01 description:"abinitio	est protein"	25	9	24	9	1	382	40.8	4.7	5.813	High	0	93.14	9	0
FALSE	Master Protein	GRMZM2G162233_P01 pep:known chromosome:AGPv3:5:206793475:206795023:1 gene:GRMZM2G162233 transcript:GRMZM2G162233_T01 description:"cdna	est protein"	40	8	22	8	1	181	20.4	6.34	7.483	High	0	93.07	8	0
FALSE	Master Protein	GRMZM2G047214_P01 pep:known chromosome:AGPv3:8:165922184:165927385:1 gene:GRMZM2G047214 transcript:GRMZM2G047214_T01 description:"cdna	est omrna|protein"	47	17	25	17	1	417	45.6	5.47	3.771	High	0	93.06	17	0
FALSE	Master Protein	GRMZM2G127374_P01 pep:known chromosome:AGPv3:1:219620045:219627231:-1 gene:GRMZM2G127374 transcript:GRMZM2G127374_T01 description:"cdna	est omrna|protein"	27	15	23	15	1	596	66.1	8.65	2.162	High	0	92.98	15	0
FALSE	Master Protein	GRMZM2G052546_P03 pep:known chromosome:AGPv3:1:2535973:2542554:-1 gene:GRMZM2G052546 transcript:GRMZM2G052546_T03 description:"cdna	est protein"	45	13	24	13	1	373	41.8	6.09	5.19	High	0	92.94	13	0
FALSE	Master Protein	GRMZM2G488458_P01	pep:known chromosome:AGPv3:7:149755602:149762339:1 gene:GRMZM2G488458 transcript:GRMZM2G488458_T01 description:"cdna"	49	11	23	11	1	249	27.8	9.39	4.623	High	0	92.86	11	0
FALSE	Master Protein	GRMZM2G121034_P01 pep:known chromosome:AGPv3:4:207582844:207587921:1 gene:GRMZM2G121034 transcript:GRMZM2G121034_T01 description:"cdna	est omrna|protein"	34	13	23	13	1	367	39.7	7.75	5.062	High	0	92.84	13	0
FALSE	Master Protein	GRMZM2G028005_P02 pep:known chromosome:AGPv3:4:233791589:233799168:1 gene:GRMZM2G028005 transcript:GRMZM2G028005_T02 description:"cdna	est omrna|protein"	26	15	22	2	1	657	70.7	8.18	1.485	High	0	92.78	15	0
FALSE	Master Protein	GRMZM2G064133_P01 pep:known chromosome:AGPv3:4:37257682:37260626:1 gene:GRMZM2G064133 transcript:GRMZM2G064133_T01 description:"cdna	est omrna|protein"	55	13	24	13	1	287	31.6	8.51	4.926	High	0	92.68	13	0
FALSE	Master Protein	GRMZM2G177508_P01 pep:known chromosome:AGPv3:1:5582721:5584189:-1 gene:GRMZM2G177508 transcript:GRMZM2G177508_T01 description:"cdna	est protein"	21	5	20	5	1	150	16.2	8.66	6.943	High	0	92.67	5	0
FALSE	Master Protein	GRMZM2G445100_P02 pep:known chromosome:AGPv3:3:187107233:187112745:-1 gene:GRMZM2G445100 transcript:GRMZM2G445100_T02 description:"cdna	est omrna|protein"	39	11	23	1	1	249	27.3	6.64	7.799	High	0	92.63	11	0
FALSE	Master Protein	GRMZM2G180612_P06 pep:known chromosome:AGPv3:2:60257952:60263097:1 gene:GRMZM2G180612 transcript:GRMZM2G180612_T06 description:"cdna	est omrna|protein"	28	10	19	10	1	451	48.7	7.78	4.484	High	0	92.58	10	0
FALSE	Master Protein	GRMZM2G030422_P01 pep:known chromosome:AGPv3:1:35244552:35255363:-1 gene:GRMZM2G030422 transcript:GRMZM2G030422_T01 description:"cdna	est omrna|protein"	18	20	24	8	1	1128	124.5	7.12	1.336	High	0	92.58	20	6
FALSE	Master Protein	GRMZM2G033649_P01 pep:known chromosome:AGPv3:8:165405936:165409040:-1 gene:GRMZM2G033649 transcript:GRMZM2G033649_T01 description:"cdna	est omrna|protein"	25	14	23	2	1	556	61.3	4.74	3.146	High	0	92.53	14	0
FALSE	Master Protein	GRMZM2G044247_P01 pep:known chromosome:AGPv3:1:3642611:3645502:-1 gene:GRMZM2G044247 transcript:GRMZM2G044247_T01 description:"cdna	est omrna|protein"	27	7	24	7	1	315	33.3	5.92	4.412	High	0	92.52	7	0
FALSE	Master Protein	GRMZM2G129804_P01 pep:known chromosome:AGPv3:10:4074286:4076892:-1 gene:GRMZM2G129804 transcript:GRMZM2G129804_T01 description:"cdna	est omrna|protein"	37	8	24	8	1	235	25.9	8.73	7.577	High	0	92.52	8	0
FALSE	Master Protein	GRMZM2G432801_P01 pep:known chromosome:AGPv3:6:160433339:160440597:-1 gene:GRMZM2G432801 transcript:GRMZM2G432801_T01 description:"cdna	est omrna|protein"	40	15	22	10	1	507	54.7	6.61	4.012	High	0	92.51	15	6
FALSE	Master Protein	GRMZM2G146192_P01	pep:known chromosome:AGPv3:4:2485517:2488897:1 gene:GRMZM2G146192 transcript:GRMZM2G146192_T01 description:"est|mrna"	21	14	24	14	1	794	83.9	8.73	1.33	High	0	92.5	14	0
FALSE	Master Protein	GRMZM2G151549_P01 pep:known chromosome:AGPv3:2:161172005:161177288:1 gene:GRMZM2G151549 transcript:GRMZM2G151549_T01 description:"cdna	est omrna|protein"	38	13	22	7	1	436	51	5.81	2.687	High	0	92.49	13	6
FALSE	Master Protein	GRMZM2G377641_P01	pep:novel chromosome:AGPv3:10:129943860:129953919:1 gene:GRMZM2G377641 transcript:GRMZM2G377641_T01 description:"abinitio"	29	15	22	15	1	697	76.5	5.14	3.217	High	0	92.43	15	0
FALSE	Master Protein	GRMZM2G139550_P02	pep:known chromosome:AGPv3:4:33693673:33721293:1 gene:GRMZM2G139550 transcript:GRMZM2G139550_T02 description:"est"	40	12	20	12	1	394	42.9	5.71	3.125	High	0	92.35	12	0
FALSE	Master Protein	GRMZM2G303631_P03 pep:known chromosome:AGPv3:5:39001364:39018329:1 gene:GRMZM2G303631 transcript:GRMZM2G303631_T03 description:"cdna	est omrna|protein"	39	23	26	20	1	618	68.7	6.42	2.899	High	0	92.3	23	3
FALSE	Master Protein	GRMZM2G158097_P02 pep:known chromosome:AGPv3:10:118849029:118858800:1 gene:GRMZM2G158097 transcript:GRMZM2G158097_T02 description:"est	omrna protein"	35	14	23	14	1	480	54.3	8.34	3.125	High	0	92.25	14	0
FALSE	Master Protein	GRMZM2G472376_P02 pep:known chromosome:AGPv3:7:104643978:104648480:1 gene:GRMZM2G472376 transcript:GRMZM2G472376_T02 description:"cdna	est mrna"	25	16	22	15	1	722	78.3	5.97	2.262	High	0	92.2	16	1
FALSE	Master Protein	GRMZM5G826194_P02	pep:known chromosome:AGPv3:6:113765176:113775821:-1 gene:GRMZM5G826194 transcript:GRMZM5G826194_T02 description:"cdna"	56	11	21	10	1	262	28.8	6.8	6.848	High	0	92.15	11	1
FALSE	Master Protein	GRMZM5G836827_P01	pep:known chromosome:AGPv3:9:106897213:106902894:-1 gene:GRMZM5G836827 transcript:GRMZM5G836827_T01 description:"est"	40	17	25	16	1	440	49.3	7.02	4.179	High	0	92.07	17	1
FALSE	Master Protein	AC234157.1_FGP002	pep:known chromosome:AGPv3:1:281175269:281177006:-1 gene:AC234157.1_FG002 transcript:AC234157.1_FGT002 description:"abinitio"	33	7	22	7	1	224	24.5	10.14	9	High	0	92.05	7	0
FALSE	Master Protein	GRMZM2G146206_P04 pep:known chromosome:AGPv3:8:168296539:168300575:1 gene:GRMZM2G146206 transcript:GRMZM2G146206_T04 description:"cdna	est omrna|protein"	33	8	24	6	1	256	27.3	5.68	7.483	High	0	92.04	8	0
FALSE	Master Protein	GRMZM2G119482_P01	pep:known chromosome:AGPv3:4:236150581:236167349:-1 gene:GRMZM2G119482 transcript:GRMZM2G119482_T01 description:"cdna|est"	31	12	22	2	1	527	56.1	7.66	2.535	High	0	92.04	12	10
FALSE	Master Protein	GRMZM2G105398_P01 pep:known chromosome:AGPv3:6:102986994:102994277:1 gene:GRMZM2G105398 transcript:GRMZM2G105398_T01 description:"cdna	est omrna|protein"	49	12	23	4	1	341	36.8	5.96	4.926	High	0	92.04	12	0
FALSE	Master Protein	GRMZM2G086116_P01 pep:known chromosome:AGPv3:5:23911335:23916254:1 gene:GRMZM2G086116 transcript:GRMZM2G086116_T01 description:"cdna	est omrna|protein"	33	15	23	3	1	499	55.8	8.48	2.49	High	0	91.96	15	12
FALSE	Master Protein	GRMZM2G178341_P01 pep:known chromosome:AGPv3:1:287405123:287407517:-1 gene:GRMZM2G178341 transcript:GRMZM2G178341_T01 description:"cdna	est omrna"	48	10	26	1	1	152	17.7	10.74	14.199	High	0	91.95	10	0
FALSE	Master Protein	GRMZM5G899366_P01	pep:known chromosome:AGPv3:Pt:24733:26784:1 gene:GRMZM5G899366 transcript:GRMZM5G899366_T01 description:"protein"	32	22	24	8	1	683	78.3	9.1	2.325	High	0	91.91	22	14
FALSE	Master Protein	GRMZM2G162388_P01 pep:known chromosome:AGPv3:4:105204217:105205395:-1 gene:GRMZM2G162388 transcript:GRMZM2G162388_T01 description:"cdna	est omrna|protein"	35	6	24	1	1	171	18.3	8.18	16.783	High	0	91.81	6	0
FALSE	Master Protein	GRMZM2G315121_P01 pep:known chromosome:AGPv3:5:189440602:189453263:1 gene:GRMZM2G315121 transcript:GRMZM2G315121_T01 description:"cdna	est omrna|protein"	52	10	20	10	1	268	27.9	7.99	9	High	0	91.75	10	0
FALSE	Master Protein	GRMZM2G368678_P01	pep:novel chromosome:AGPv3:6:119859267:119878174:-1 gene:GRMZM2G368678 transcript:GRMZM2G368678_T01 description:"abinitio"	14	23	25	7	1	1764	196.5	6.52	0.874	High	0	91.74	23	0
FALSE	Master Protein	GRMZM2G050270_P01 pep:known chromosome:AGPv3:8:142813648:142817619:-1 gene:GRMZM2G050270 transcript:GRMZM2G050270_T01 description:"cdna	est omrna|protein"	39	14	23	4	1	428	46.1	5.25	4.754	High	0	91.68	14	0
FALSE	Master Protein	GRMZM2G138782_P01	pep:novel chromosome:AGPv3:2:6821962:6854425:1 gene:GRMZM2G138782 transcript:GRMZM2G138782_T01 description:"protein"	32	15	21	7	1	620	67.3	5.12	2.262	High	0	91.66	15	8
FALSE	Master Protein	GRMZM2G315931_P01 pep:known chromosome:AGPv3:4:197229916:197239315:1 gene:GRMZM2G315931 transcript:GRMZM2G315931_T01 description:"cdna	est omrna"	23	15	22	15	1	928	97	8.1	1.834	High	0	91.64	15	0
FALSE	Master Protein	GRMZM2G119583_P01 pep:known chromosome:AGPv3:6:24318397:24320624:-1 gene:GRMZM2G119583 transcript:GRMZM2G119583_T01 description:"cdna	est omrna|protein"	35	15	20	15	1	495	52	7.27	4.248	High	0	91.63	15	0
FALSE	Master Protein	GRMZM2G160184_P01 pep:known chromosome:AGPv3:2:114878358:114884329:-1 gene:GRMZM2G160184 transcript:GRMZM2G160184_T01 description:"cdna	est omrna|protein"	30	11	24	1	1	335	37	7.17	6.406	High	0	91.55	11	11
FALSE	Master Protein	GRMZM5G879235_P01 pep:known chromosome:AGPv3:Pt:75623:77189:-1 gene:GRMZM5G879235 transcript:GRMZM5G879235_T01 description:"est	mrna protein"	54	15	23	15	1	339	38.9	6.79	7.111	High	0	91.49	15	0
FALSE	Master Protein	GRMZM2G086636_P01 pep:known chromosome:AGPv3:8:42018835:42021472:-1 gene:GRMZM2G086636 transcript:GRMZM2G086636_T01 description:"est	omrna protein"	43	12	22	7	1	300	33.9	9.45	5.952	High	0	91.3	12	5
FALSE	Master Protein	GRMZM2G455085_P01 pep:known chromosome:AGPv3:7:149205722:149210560:1 gene:GRMZM2G455085 transcript:GRMZM2G455085_T01 description:"est	omrna protein"	34	16	26	13	1	425	47.8	5.2	3.771	High	0	91.3	16	2
FALSE	Master Protein	GRMZM2G124576_P02 pep:known chromosome:AGPv3:1:59672747:59676878:-1 gene:GRMZM2G124576 transcript:GRMZM2G124576_T02 description:"cdna	est omrna|protein"	38	20	23	8	1	564	62	9	3.037	High	0	91.27	20	12
FALSE	Master Protein	GRMZM2G161493_P01 pep:known chromosome:AGPv3:6:86936812:86947218:1 gene:GRMZM2G161493 transcript:GRMZM2G161493_T01 description:"est	omrna protein"	38	19	23	7	1	617	67.8	6.49	2.57	High	0	91.24	19	12
FALSE	Master Protein	GRMZM2G003762_P03 pep:known chromosome:AGPv3:10:4676406:4679041:-1 gene:GRMZM2G003762 transcript:GRMZM2G003762_T03 description:"cdna	est omrna|protein"	45	8	21	5	1	238	25.3	6.28	10.938	High	0	91.24	8	3
FALSE	Master Protein	GRMZM2G009282_P01 pep:known chromosome:AGPv3:3:22821827:22827568:-1 gene:GRMZM2G009282 transcript:GRMZM2G009282_T01 description:"est	omrna protein"	20	15	23	15	1	927	102.3	7.24	1.467	High	0	91.08	15	0
FALSE	Master Protein	GRMZM2G365423_P01 pep:novel chromosome:AGPv3:4:65845329:65852416:1 gene:GRMZM2G365423 transcript:GRMZM2G365423_T01 description:"abinitio	est omrna|protein"	33	15	22	15	1	566	59.8	6.61	2.765	High	0	91	15	0
FALSE	Master Protein	GRMZM2G457699_P02	pep:known chromosome:AGPv3:6:3190761:3195290:-1 gene:GRMZM2G457699 transcript:GRMZM2G457699_T02 description:"est"	40	11	22	2	1	266	29.4	9	5.158	High	0	90.98	11	0
FALSE	Master Protein	GRMZM2G464137_P02 pep:known chromosome:AGPv3:10:146837233:146840698:-1 gene:GRMZM2G464137 transcript:GRMZM2G464137_T02 description:"cdna	est omrna|protein"	35	15	24	15	1	425	48.1	6.23	3.642	High	0	90.96	15	0
FALSE	Master Protein	GRMZM2G009070_P01 pep:known chromosome:AGPv3:9:117602450:117606164:1 gene:GRMZM2G009070 transcript:GRMZM2G009070_T01 description:"cdna	est omrna|protein"	27	12	20	12	1	760	82.5	4.61	1.661	High	0	90.85	12	0
FALSE	Master Protein	GRMZM2G024104_P01 pep:known chromosome:AGPv3:1:267960169:267963551:-1 gene:GRMZM2G024104 transcript:GRMZM2G024104_T01 description:"cdna	est omrna"	49	11	21	10	1	369	40.2	6.2	10.548	High	0	90.81	11	0
FALSE	Master Protein	GRMZM2G003765_P02 pep:known chromosome:AGPv3:10:83431040:83433556:1 gene:GRMZM2G003765 transcript:GRMZM2G003765_T02 description:"cdna	est omrna|protein"	60	10	22	10	1	223	24.6	9.11	9	High	0	90.75	10	0
FALSE	Master Protein	GRMZM2G140782_P01 pep:known chromosome:AGPv3:8:10086438:10093231:-1 gene:GRMZM2G140782 transcript:GRMZM2G140782_T01 description:"cdna	est omrna|protein"	38	7	19	7	1	245	26.6	9.95	5.105	High	0	90.67	7	0
FALSE	Master Protein	GRMZM2G013750_P04 pep:known chromosome:AGPv3:5:1022941:1027455:1 gene:GRMZM2G013750 transcript:GRMZM2G013750_T04 description:"cdna	est omrna|protein"	41	17	25	6	1	443	50.5	7.42	3.642	High	0	90.56	17	11
FALSE	Master Protein	GRMZM2G372297_P01 pep:known chromosome:AGPv3:3:227043864:227047835:1 gene:GRMZM2G372297 transcript:GRMZM2G372297_T01 description:"cdna	est omrna|protein"	40	13	23	13	1	383	41	5.66	6.305	High	0	90.56	13	0
FALSE	Master Protein	GRMZM2G395114_P01 pep:known chromosome:AGPv3:2:4895674:4900685:1 gene:GRMZM2G395114 transcript:GRMZM2G395114_T01 description:"cdna	est omrna|protein"	25	13	22	12	1	660	71.8	8.69	3.101	High	0	90.54	13	1
FALSE	Master Protein	GRMZM2G033526_P01 pep:known chromosome:AGPv3:1:97682229:97687870:1 gene:GRMZM2G033526 transcript:GRMZM2G033526_T01 description:"cdna	est omrna|protein"	44	17	22	6	1	568	61.4	6.74	3.642	High	0	90.49	17	12
FALSE	Master Protein	GRMZM2G702490_P02	pep:novel chromosome:AGPv3:4:79183904:79188864:-1 gene:GRMZM2G702490 transcript:GRMZM2G702490_T02 description:"cdna"	36	17	22	17	1	619	66.2	8.03	2.162	High	0	90.42	17	0
FALSE	Master Protein	GRMZM2G132060_P01 pep:known chromosome:AGPv3:5:65249498:65254103:-1 gene:GRMZM2G132060 transcript:GRMZM2G132060_T01 description:"cdna	est omrna|protein"	30	11	20	11	1	583	66.3	5.12	3.962	High	0	90.41	11	0
FALSE	Master Protein	GRMZM2G145500_P02 pep:known chromosome:AGPv3:5:98679719:98688903:1 gene:GRMZM2G145500 transcript:GRMZM2G145500_T02 description:"cdna	est protein"	9	2	20	2	1	285	29.6	10.1	1.154	High	0	90.3	2	0
FALSE	Master Protein	GRMZM2G089365_P01 pep:known chromosome:AGPv3:3:27392126:27395824:1 gene:GRMZM2G089365 transcript:GRMZM2G089365_T01 description:"cdna	est omrna|protein"	33	13	24	3	1	387	41.6	8.18	5.7	High	0	90.3	13	0
FALSE	Master Protein	GRMZM2G050072_P01 pep:known chromosome:AGPv3:8:142811621:142813504:-1 gene:GRMZM2G050072 transcript:GRMZM2G050072_T01 description:"abinitio	cdna est|omrna"	45	13	21	11	1	428	45.5	5.19	4.484	High	0	90.26	13	0
FALSE	Master Protein	GRMZM2G042146_P03	pep:novel chromosome:AGPv3:6:131395845:131399561:-1 gene:GRMZM2G042146 transcript:GRMZM2G042146_T03 description:"est|omrna"	37	12	24	1	1	315	34	9.58	6.943	High	0	90.22	12	0
FALSE	Master Protein	GRMZM2G121293_P01 pep:known chromosome:AGPv3:1:249596401:249599355:1 gene:GRMZM2G121293 transcript:GRMZM2G121293_T01 description:"cdna	est omrna|protein"	22	14	22	14	1	764	77.7	6.42	2.162	High	0	90.16	14	0
FALSE	Master Protein	GRMZM2G125148_P03 pep:known chromosome:AGPv3:9:129666507:129670668:1 gene:GRMZM2G125148 transcript:GRMZM2G125148_T03 description:"cdna	est protein"	37	19	24	7	1	562	62.1	8.88	3.037	High	0	90.06	19	0
FALSE	Master Protein	GRMZM2G022563_P01 pep:known chromosome:AGPv3:2:6038651:6046071:-1 gene:GRMZM2G022563 transcript:GRMZM2G022563_T01 description:"cdna	est omrna|protein"	38	12	19	9	1	401	41.6	7.05	3.217	High	0	90.02	12	3
FALSE	Master Protein	GRMZM2G097164_P01 pep:known chromosome:AGPv3:1:263265598:263269102:-1 gene:GRMZM2G097164 transcript:GRMZM2G097164_T01 description:"cdna	est omrna|protein"	64	12	22	7	1	211	23.2	5.64	15.379	High	0	89.96	12	5
FALSE	Master Protein	GRMZM2G320307_P01 pep:known chromosome:AGPv3:5:201321030:201326036:-1 gene:GRMZM2G320307 transcript:GRMZM2G320307_T01 description:"cdna	est omrna|protein"	39	17	23	17	1	478	51.9	8.34	3.758	High	0	89.85	17	0
FALSE	Master Protein	GRMZM2G179301_P02 pep:known chromosome:AGPv3:6:145279441:145284252:1 gene:GRMZM2G179301 transcript:GRMZM2G179301_T02 description:"cdna	est omrna"	48	10	22	6	1	240	25.7	5.6	5.661	High	0	89.76	10	4
FALSE	Master Protein	GRMZM2G387076_P02	pep:known chromosome:AGPv3:8:166048633:166053715:-1 gene:GRMZM2G387076 transcript:GRMZM2G387076_T02 description:"omrna|protein"	35	15	25	4	1	359	40	9.8	4.623	High	0	89.75	15	11
FALSE	Master Protein	GRMZM2G029048_P01	pep:known chromosome:AGPv3:5:186776435:186780444:-1 gene:GRMZM2G029048 transcript:GRMZM2G029048_T01 description:"est"	24	15	23	6	1	719	77.4	6.64	1.462	High	0	89.73	15	5
FALSE	Master Protein	GRMZM2G134806_P01	pep:known chromosome:AGPv3:4:241794528:241799858:1 gene:GRMZM2G134806 transcript:GRMZM2G134806_T01 description:"cdna cdna"	36	15	25	15	1	399	43.4	5.21	5.918	High	0	89.71	15	0
FALSE	Master Protein	GRMZM2G124455_P01	pep:known chromosome:AGPv3:8:91341442:91354880:1 gene:GRMZM2G124455 transcript:GRMZM2G124455_T01 description:"cdna|est"	46	9	21	1	1	233	25.2	7.27	13.251	High	0	89.69	9	0
FALSE	Master Protein	GRMZM2G152105_P01	pep:known chromosome:AGPv3:9:122773640:122779565:1 gene:GRMZM2G152105 transcript:GRMZM2G152105_T01 description:"cdna|est"	34	11	20	10	1	494	52.9	7.42	3.786	High	0	89.66	11	1
FALSE	Master Protein	GRMZM2G093945_P01 pep:known chromosome:AGPv3:4:70866148:70871104:1 gene:GRMZM2G093945 transcript:GRMZM2G093945_T01 description:"cdna	est omrna|protein"	55	14	24	5	1	332	36.6	6.7	7.913	High	0	89.56	14	0
FALSE	Master Protein	GRMZM2G165390_P01 pep:known chromosome:AGPv3:9:11779648:11781406:-1 gene:GRMZM2G165390 transcript:GRMZM2G165390_T01 description:"est	omrna protein"	34	12	18	12	1	471	48.7	5.55	4.78	High	0	89.55	12	0
FALSE	Master Protein	GRMZM2G155974_P02	pep:known chromosome:AGPv3:3:133812995:133825530:1 gene:GRMZM2G155974 transcript:GRMZM2G155974_T02 description:"est|protein"	39	15	20	13	1	492	54.6	6.15	3.52	High	0	89.49	15	2
FALSE	Master Protein	GRMZM2G157329_P01 pep:known chromosome:AGPv3:1:41540438:41544745:-1 gene:GRMZM2G157329 transcript:GRMZM2G157329_T01 description:"abinitio	cdna omrna"	53	13	22	7	1	253	26.5	10.24	7.733	High	0	89.46	13	6
FALSE	Master Protein	GRMZM2G143071_P01 pep:known chromosome:AGPv3:10:143877838:143886034:-1 gene:GRMZM2G143071 transcript:GRMZM2G143071_T01 description:"est	omrna protein"	32	14	19	6	1	623	68.2	5.24	2.275	High	0	89.45	14	0
FALSE	Master Protein	GRMZM2G009715_P02 pep:known chromosome:AGPv3:3:87793922:87799627:-1 gene:GRMZM2G009715 transcript:GRMZM2G009715_T02 description:"cdna	est omrna|protein"	23	13	20	13	1	798	85.9	6.25	1.462	High	0	89.37	13	0
FALSE	Master Protein	GRMZM2G124059_P01	pep:known chromosome:AGPv3:9:136336613:136340920:1 gene:GRMZM2G124059 transcript:GRMZM2G124059_T01 description:"cdna|est"	35	13	20	13	1	516	57.5	6.1	2.162	High	0	89.36	13	0
FALSE	Master Protein	GRMZM2G180283_P01 pep:known chromosome:AGPv3:2:202536125:202537725:-1 gene:GRMZM2G180283 transcript:GRMZM2G180283_T01 description:"cdna	est omrna|protein"	37	12	21	12	1	427	46.7	6.25	6.197	High	0	89.26	12	0
FALSE	Master Protein	GRMZM2G451224_P01 pep:known chromosome:AGPv3:6:164173766:164175105:-1 gene:GRMZM2G451224 transcript:GRMZM2G451224_T01 description:"cdna	est omrna|protein"	39	4	26	4	1	142	14.9	10.1	4.623	High	0	89.2	4	0
FALSE	Master Protein	GRMZM2G149567_P01 pep:known chromosome:AGPv3:2:60425876:60433005:-1 gene:GRMZM2G149567 transcript:GRMZM2G149567_T01 description:"cdna	est omrna|protein"	29	20	25	12	1	932	101.2	8.35	1.326	High	0	89.18	20	7
FALSE	Master Protein	GRMZM2G058305_P01 pep:known chromosome:AGPv3:8:75119745:75123757:-1 gene:GRMZM2G058305 transcript:GRMZM2G058305_T01 description:"cdna	est omrna|protein"	36	13	20	6	1	539	60.7	6.93	1.656	High	0	89.15	13	0
FALSE	Master Protein	GRMZM2G166035_P01 pep:known chromosome:AGPv3:4:238052005:238055564:-1 gene:GRMZM2G166035 transcript:GRMZM2G166035_T01 description:"cdna	est omrna|protein"	53	15	24	9	1	290	31.2	4.92	5.062	High	0	89.15	15	6
FALSE	Master Protein	GRMZM2G314233_P01	pep:novel chromosome:AGPv3:5:79540429:79542136:1 gene:GRMZM2G314233 transcript:GRMZM2G314233_T01 description:"est"	51	9	23	1	1	161	17.7	5.22	9	High	0	89.07	9	0
FALSE	Master Protein	GRMZM2G110881_P01 pep:known chromosome:AGPv3:5:2594420:2603889:-1 gene:GRMZM2G110881 transcript:GRMZM2G110881_T01 description:"cdna	est omrna|protein"	37	10	20	10	1	331	35.5	6.61	4.275	High	0	88.93	10	0
FALSE	Master Protein	GRMZM2G319074_P01 pep:novel chromosome:AGPv3:1:235579231:235579804:1 gene:GRMZM2G319074 transcript:GRMZM2G319074_T01 description:"est	omrna protein"	52	4	23	1	1	94	10.5	9.35	13.678	High	0	88.92	4	0
FALSE	Master Protein	GRMZM2G122337_P01 pep:known chromosome:AGPv3:6:1340417:1341388:-1 gene:GRMZM2G122337 transcript:GRMZM2G122337_T01 description:"cdna	est omrna|protein"	12	2	24	2	1	150	15.7	4.74	1.783	High	0	88.89	2	0
FALSE	Master Protein	GRMZM2G074589_P01 pep:known chromosome:AGPv3:9:32468024:32477360:-1 gene:GRMZM2G074589 transcript:GRMZM2G074589_T01 description:"cdna	est omrna|protein"	33	15	22	15	1	591	66.3	6.35	2.621	High	0	88.88	15	0
FALSE	Master Protein	GRMZM2G108348_P03	pep:known chromosome:AGPv3:3:135622565:135624833:-1 gene:GRMZM2G108348 transcript:GRMZM2G108348_T03 description:"est|protein"	55	11	24	6	1	194	22.4	10.32	16.013	High	0	88.84	11	5
FALSE	Master Protein	GRMZM2G140885_P01 pep:known chromosome:AGPv3:8:1342790:1347639:1 gene:GRMZM2G140885 transcript:GRMZM2G140885_T01 description:"cdna	est omrna|protein"	48	9	19	4	1	263	28.4	7.56	5.494	High	0	88.84	9	5
FALSE	Master Protein	GRMZM2G122116_P01 pep:known chromosome:AGPv3:7:175323051:175332481:1 gene:GRMZM2G122116 transcript:GRMZM2G122116_T01 description:"cdna	est omrna"	28	21	23	21	1	890	97.8	5.92	1.512	High	0	88.79	21	0
FALSE	Master Protein	GRMZM2G096806_P01 pep:known chromosome:AGPv3:1:192437196:192441780:-1 gene:GRMZM2G096806 transcript:GRMZM2G096806_T01 description:"abinitio	est omrna"	27	18	22	18	1	1076	114.7	4.55	1.534	High	0	88.79	18	0
FALSE	Master Protein	GRMZM5G867518_P02	pep:known chromosome:AGPv3:3:189525336:189527303:-1 gene:GRMZM5G867518 transcript:GRMZM5G867518_T02 description:"est"	40	6	23	1	1	108	12.1	10.59	45.416	High	0	88.73	6	0
FALSE	Master Protein	GRMZM2G360867_P01 pep:novel chromosome:AGPv3:1:72420892:72423251:1 gene:GRMZM2G360867 transcript:GRMZM2G360867_T01 description:"abinitio	cdna est|omrna|protein"	23	7	22	4	1	320	35.4	5.76	2.511	High	0	88.67	7	1
FALSE	Master Protein	GRMZM2G024099_P01 pep:known chromosome:AGPv3:1:18187897:18189714:1 gene:GRMZM2G024099 transcript:GRMZM2G024099_T01 description:"cdna	est omrna|protein"	39	10	19	10	1	431	44.6	7.01	10.788	High	0	88.66	10	0
FALSE	Master Protein	GRMZM2G151169_P01 pep:known chromosome:AGPv3:6:81597874:81602698:-1 gene:GRMZM2G151169 transcript:GRMZM2G151169_T01 description:"cdna	est omrna|protein"	23	18	23	7	1	1016	114.7	7.21	1.336	High	0	88.66	18	1
FALSE	Master Protein	GRMZM2G323504_P01	pep:known chromosome:AGPv3:2:187466682:187468109:1 gene:GRMZM2G323504 transcript:GRMZM2G323504_T01 description:"cdna|protein"	36	10	20	10	1	361	39.1	6.06	4.623	High	0	88.62	10	0
FALSE	Master Protein	GRMZM2G174572_P01 pep:known chromosome:AGPv3:5:130986092:130995528:1 gene:GRMZM2G174572 transcript:GRMZM2G174572_T01 description:"cdna	est omrna|protein"	27	15	20	15	1	796	88.9	6.48	1.707	High	0	88.59	15	0
FALSE	Master Protein	GRMZM2G010743_P01 pep:known chromosome:AGPv3:4:105122427:105125306:1 gene:GRMZM2G010743 transcript:GRMZM2G010743_T01 description:"cdna	est omrna|protein"	21	7	19	3	1	270	28.3	9.94	5.579	High	0	88.53	7	0
FALSE	Master Protein	GRMZM2G070723_P02 pep:known chromosome:AGPv3:4:3457769:3464144:-1 gene:GRMZM2G070723 transcript:GRMZM2G070723_T02 description:"est	omrna protein"	35	12	21	12	1	412	46.4	6.11	3.365	High	0	88.5	12	0
FALSE	Master Protein	GRMZM2G018566_P02 pep:known chromosome:AGPv3:3:43992426:43997729:1 gene:GRMZM2G018566 transcript:GRMZM2G018566_T02 description:"cdna	est protein"	39	12	21	1	1	365	39.7	6.98	4.012	High	0	88.37	12	0
FALSE	Master Protein	GRMZM2G075719_P02 pep:known chromosome:AGPv3:7:150455153:150459456:1 gene:GRMZM2G075719 transcript:GRMZM2G075719_T02 description:"cdna	est omrna|protein"	37	10	24	9	1	249	27.8	8.5	5.158	High	0	88.36	10	0
FALSE	Master Protein	GRMZM2G129238_P01 pep:novel chromosome:AGPv3:2:219132473:219135240:-1 gene:GRMZM2G129238 transcript:GRMZM2G129238_T01 description:"cdna	est omrna"	31	16	23	16	1	587	66.9	6.95	2.07	High	0	88.32	16	0
FALSE	Master Protein	GRMZM2G023073_P02	pep:known chromosome:AGPv3:10:77758100:77774208:-1 gene:GRMZM2G023073 transcript:GRMZM2G023073_T01 description:"cdna"	47	15	20	15	1	394	43.3	6.9	3.262	High	0	88.24	15	0
FALSE	Master Protein	GRMZM2G112524_P02 pep:known chromosome:AGPv3:1:47176577:47177680:1 gene:GRMZM2G112524 transcript:GRMZM2G112524_T02 description:"cdna	est omrna|protein"	73	11	21	10	1	160	16.9	5.54	42.288	High	0	88.15	11	1
FALSE	Master Protein	GRMZM2G362850_P01 pep:known chromosome:AGPv3:3:163786353:163791421:-1 gene:GRMZM2G362850 transcript:GRMZM2G362850_T01 description:"cdna	est protein"	38	17	22	9	1	571	62.4	9.52	2.07	High	0	88.13	17	4
FALSE	Master Protein	GRMZM2G127141_P01 pep:known chromosome:AGPv3:9:125383956:125388954:1 gene:GRMZM2G127141 transcript:GRMZM2G127141_T01 description:"cdna	omrna protein"	31	9	19	9	1	372	42.3	6.54	2.675	High	0	88.02	9	0
FALSE	Master Protein	GRMZM2G141510_P01 pep:known chromosome:AGPv3:2:213468634:213472880:1 gene:GRMZM2G141510 transcript:GRMZM2G141510_T01 description:"cdna	est omrna|protein"	38	14	20	14	1	425	46.6	5.05	5.7	High	0	87.97	14	0
FALSE	Master Protein	GRMZM2G383154_P01	pep:known chromosome:AGPv3:3:66731490:66735176:-1 gene:GRMZM2G383154 transcript:GRMZM2G383154_T01 description:"est|protein"	32	10	22	10	1	374	41.7	9.28	3.217	High	0	87.83	10	0
FALSE	Master Protein	GRMZM2G077361_P01 pep:known chromosome:AGPv3:7:45162309:45167457:1 gene:GRMZM2G077361 transcript:GRMZM2G077361_T01 description:"cdna	est omrna|protein"	51	15	23	15	1	340	36.6	6.05	6.305	High	0	87.82	15	0
FALSE	Master Protein	GRMZM2G154509_P04	pep:known chromosome:AGPv3:10:95777363:95782434:-1 gene:GRMZM2G154509 transcript:GRMZM2G154509_T04 description:"est"	34	11	23	1	1	289	32.5	6.4	7.962	High	0	87.78	11	0
FALSE	Master Protein	GRMZM2G013650_P01 pep:known chromosome:AGPv3:1:143885142:143895725:-1 gene:GRMZM2G013650 transcript:GRMZM2G013650_T01 description:"cdna	est omrna|protein"	30	15	23	15	1	571	61.4	5.96	2.728	High	0	87.72	15	0
FALSE	Master Protein	GRMZM2G178917_P01 pep:known chromosome:AGPv3:2:193043219:193053272:1 gene:GRMZM2G178917 transcript:GRMZM2G178917_T01 description:"cdna	est omrna|protein"	20	15	23	15	1	877	98.4	6.81	1.219	High	0	87.7	15	0
FALSE	Master Protein	GRMZM2G148867_P01 pep:known chromosome:AGPv3:1:201775882:201782559:-1 gene:GRMZM2G148867 transcript:GRMZM2G148867_T01 description:"abinitio	cdna est|omrna|protein"	62	8	19	8	1	167	18	9.45	30.623	High	0	87.69	8	0
FALSE	Master Protein	GRMZM2G169087_P01 pep:known chromosome:AGPv3:2:212435372:212438521:1 gene:GRMZM2G169087 transcript:GRMZM2G169087_T01 description:"est	omrna protein"	40	16	22	16	1	444	47.2	6.6	4.878	High	0	87.53	16	0
FALSE	Master Protein	GRMZM2G061662_P01 pep:novel chromosome:AGPv3:1:293217775:293228618:1 gene:GRMZM2G061662 transcript:GRMZM2G061662_T01 description:"cdna	est omrna|protein"	35	14	20	14	1	529	58.9	5.35	2.535	High	0	87.51	14	0
FALSE	Master Protein	GRMZM2G129015_P01 pep:known chromosome:AGPv3:1:292314733:292318036:1 gene:GRMZM2G129015 transcript:GRMZM2G129015_T01 description:"cdna	est omrna"	45	5	17	5	1	132	14.8	11.03	99	High	0	87.5	5	0
FALSE	Master Protein	GRMZM2G036590_P01 pep:known chromosome:AGPv3:5:183665320:183669049:-1 gene:GRMZM2G036590 transcript:GRMZM2G036590_T01 description:"cdna	est omrna|protein"	34	10	22	5	1	328	36.3	4.6	7.66	High	0	87.38	10	0
FALSE	Master Protein	GRMZM2G387383_P01 pep:novel chromosome:AGPv3:2:218505544:218512724:1 gene:GRMZM2G387383 transcript:GRMZM2G387383_T01 description:"abinitio	est omrna"	30	14	19	1	1	582	65.4	7.03	1.894	High	0	87.36	14	0
FALSE	Master Protein	GRMZM2G416388_P06	pep:known chromosome:AGPv3:1:273932677:273934626:-1 gene:GRMZM2G416388 transcript:GRMZM2G416388_T06 description:"protein"	40	10	23	10	1	286	31.9	9.44	6.848	High	0	87.27	10	0
FALSE	Master Protein	GRMZM2G332976_P01 pep:known chromosome:AGPv3:5:3146074:3147825:-1 gene:GRMZM2G332976 transcript:GRMZM2G332976_T01 description:"cdna	est omrna|protein"	53	10	18	10	1	283	29.3	6.16	7.733	High	0	87.18	10	0
FALSE	Master Protein	GRMZM2G085474_P04	pep:known chromosome:AGPv3:1:180428002:180433544:-1 gene:GRMZM2G085474 transcript:GRMZM2G085474_T04 description:"omrna|protein"	52	13	20	7	1	401	41.1	6.68	4.109	High	0	86.88	13	0
FALSE	Master Protein	GRMZM2G086801_P01 pep:known chromosome:AGPv3:2:4693195:4697981:1 gene:GRMZM2G086801 transcript:GRMZM2G086801_T01 description:"cdna	est omrna|protein"	45	13	22	13	1	362	40.1	5.36	4.484	High	0	86.78	13	0
FALSE	Master Protein	GRMZM2G090675_P01 pep:known chromosome:AGPv3:2:103527332:103536155:-1 gene:GRMZM2G090675 transcript:GRMZM2G090675_T01 description:"cdna	est omrna|protein"	44	8	19	8	1	227	24.5	9.31	11.328	High	0	86.63	8	0
FALSE	Master Protein	GRMZM2G075900_P01 pep:known chromosome:AGPv3:3:118181859:118192369:-1 gene:GRMZM2G075900 transcript:GRMZM2G075900_T01 description:"cdna	est omrna|protein"	17	11	23	4	1	807	85.6	5.83	1.154	High	0	86.63	11	6
FALSE	Master Protein	GRMZM2G369939_P01 pep:known chromosome:AGPv3:5:28228844:28231675:1 gene:GRMZM2G369939 transcript:GRMZM2G369939_T01 description:"cdna	est protein"	33	14	22	2	1	454	49.2	5.81	3.262	High	0	86.57	14	0
FALSE	Master Protein	GRMZM2G424832_P01 pep:known chromosome:AGPv3:7:18620330:18626341:-1 gene:GRMZM2G424832 transcript:GRMZM2G424832_T01 description:"cdna	est omrna|protein"	16	13	22	6	1	1077	120.4	7.72	0.795	High	0	86.53	13	6
FALSE	Master Protein	GRMZM2G140288_P01 pep:known chromosome:AGPv3:7:167183707:167192190:-1 gene:GRMZM2G140288 transcript:GRMZM2G140288_T01 description:"abinitio	cdna est|omrna|protein"	17	12	19	3	1	956	105.3	7.77	1.186	High	0	86.47	12	9
FALSE	Master Protein	GRMZM2G117369_P02 pep:known chromosome:AGPv3:7:13405634:13414662:1 gene:GRMZM2G117369 transcript:GRMZM2G117369_T03 description:"est	protein cdna cdna"	24	13	21	12	1	562	61.2	6.76	2.162	High	0	86.44	13	1
FALSE	Master Protein	GRMZM2G099626_P02	pep:known chromosome:AGPv3:6:167715792:167717062:-1 gene:GRMZM2G099626 transcript:GRMZM2G099626_T02 description:"abinitio"	46	11	20	11	1	305	32.2	8.79	6.079	High	0	86.44	11	0
FALSE	Master Protein	GRMZM2G009464_P01 pep:known chromosome:AGPv3:3:109188954:109192744:1 gene:GRMZM2G009464 transcript:GRMZM2G009464_T01 description:"cdna	est omrna|protein"	25	12	21	3	1	595	66.2	6.71	1.966	High	0	86.33	12	0
FALSE	Master Protein	GRMZM2G396292_P03	pep:known chromosome:AGPv3:6:45435079:45439161:-1 gene:GRMZM2G396292 transcript:GRMZM2G396292_T03 description:"cdna"	40	15	20	9	1	485	52.1	6.68	4.38	High	0	86.24	15	6
FALSE	Master Protein	GRMZM2G138995_P01 pep:known chromosome:AGPv3:8:156012383:156016375:1 gene:GRMZM2G138995 transcript:GRMZM2G138995_T01 description:"cdna	est omrna|protein"	34	10	20	1	1	373	40.6	7.23	4.484	High	0	86.17	10	0
FALSE	Master Protein	GRMZM2G061830_P02 pep:known chromosome:AGPv3:3:11535372:11540445:1 gene:GRMZM2G061830 transcript:GRMZM2G061830_T02 description:"cdna	est omrna|protein"	61	14	22	14	1	311	33.8	8.94	6.197	High	0	86.17	14	0
FALSE	Master Protein	GRMZM2G084757_P01 pep:known chromosome:AGPv3:7:149287705:149290243:1 gene:GRMZM2G084757 transcript:GRMZM2G084757_T01 description:"cdna	est omrna|protein"	42	9	23	1	1	204	24.3	11.63	6.197	High	0	86.16	9	0
FALSE	Master Protein	GRMZM2G041697_P03 pep:known chromosome:AGPv3:6:156173856:156188567:1 gene:GRMZM2G041697 transcript:GRMZM2G041697_T03 description:"cdna	est omrna|protein"	15	21	23	21	1	1622	182.7	5.22	0.677	High	0	86.15	21	0
FALSE	Master Protein	GRMZM2G320325_P03 pep:known chromosome:AGPv3:1:55071447:55076251:-1 gene:GRMZM2G320325 transcript:GRMZM2G320325_T03 description:"cdna	est omrna|protein"	33	7	21	7	1	303	32.3	5.67	9	High	0	86.11	7	0
FALSE	Master Protein	GRMZM2G105019_P01 pep:known chromosome:AGPv3:3:217545398:217552377:-1 gene:GRMZM2G105019 transcript:GRMZM2G105019_T01 description:"abinitio	cdna est|omrna"	41	15	21	5	1	361	40.3	5.08	7.031	High	0	86.06	15	10
FALSE	Master Protein	GRMZM2G000039_P01 pep:known chromosome:AGPv3:2:9018122:9027319:-1 gene:GRMZM2G000039 transcript:GRMZM2G000039_T01 description:"cdna	est omrna|protein"	20	12	22	12	1	736	82	4.67	1.356	High	0	86.03	12	0
FALSE	Master Protein	GRMZM5G873519_P02	pep:known chromosome:AGPv3:1:105237264:105239945:-1 gene:GRMZM5G873519 transcript:GRMZM5G873519_T02 description:"est"	10	4	17	3	1	542	56.6	9.61	0.859	High	0	86.01	4	0
FALSE	Master Protein	GRMZM2G315125_P01 pep:known chromosome:AGPv3:8:91285874:91289597:1 gene:GRMZM2G315125 transcript:GRMZM2G315125_T01 description:"abinitio	cdna est|omrna|protein"	28	16	22	3	1	712	78.4	6.13	1.918	High	0	86	16	0
FALSE	Master Protein	GRMZM2G172956_P02 pep:known chromosome:AGPv3:3:36319143:36321201:-1 gene:GRMZM2G172956 transcript:GRMZM2G172956_T02 description:"cdna	est omrna|protein"	36	17	22	2	1	579	63.8	9.11	2.621	High	0	85.95	17	0
FALSE	Master Protein	GRMZM2G166345_P02 pep:known chromosome:AGPv3:8:169867846:169880639:1 gene:GRMZM2G166345 transcript:GRMZM2G166345_T02 description:"cdna	est omrna"	54	16	21	16	1	348	37.8	8.05	5.19	High	0	85.87	16	0
FALSE	Master Protein	GRMZM2G128056_P01 pep:known chromosome:AGPv3:9:12576278:12585044:1 gene:GRMZM2G128056 transcript:GRMZM2G128056_T01 description:"cdna	est omrna|protein"	30	12	18	12	1	474	52.6	6.65	3.786	High	0	85.87	12	0
FALSE	Master Protein	GRMZM2G152775_P04	pep:known chromosome:AGPv3:6:69729167:69732684:-1 gene:GRMZM2G152775 transcript:GRMZM2G152775_T04 description:"mrna"	64	12	22	1	1	244	26.1	5.78	10.45	High	0	85.85	12	11
FALSE	Master Protein	GRMZM2G156673_P01 pep:known chromosome:AGPv3:8:6591423:6593377:1 gene:GRMZM2G156673 transcript:GRMZM2G156673_T01 description:"cdna	est omrna|protein"	43	10	24	3	1	199	22.4	9.77	17.738	High	0	85.81	10	8
FALSE	Master Protein	GRMZM2G165926_P02 pep:known chromosome:AGPv3:1:32999088:33004423:-1 gene:GRMZM2G165926 transcript:GRMZM2G165926_T02 description:"cdna	est omrna|protein"	30	9	20	9	1	400	42.1	4.6	10.659	High	0	85.75	9	0
FALSE	Master Protein	GRMZM2G032936_P01 pep:known chromosome:AGPv3:1:54843627:54851715:1 gene:GRMZM2G032936 transcript:GRMZM2G032936_T01 description:"est	omrna protein"	29	12	20	12	1	454	50	5.78	2.455	High	0	85.74	12	0
FALSE	Master Protein	GRMZM2G101938_P01 pep:known chromosome:AGPv3:6:105593024:105601059:1 gene:GRMZM2G101938 transcript:GRMZM2G101938_T01 description:"cdna	est omrna|protein"	55	13	22	2	1	217	24	5.73	9	High	0	85.72	13	11
FALSE	Master Protein	GRMZM2G022130_P04	pep:known chromosome:AGPv3:5:21913257:21924700:-1 gene:GRMZM2G022130 transcript:GRMZM2G022130_T04 description:"cdna|est"	44	13	21	13	1	371	40.4	9.25	5.19	High	0	85.72	13	0
FALSE	Master Protein	GRMZM2G152801_P01 pep:known chromosome:AGPv3:5:210204906:210206387:-1 gene:GRMZM2G152801 transcript:GRMZM2G152801_T01 description:"cdna	est omrna|protein"	39	12	22	1	1	333	36.9	6.54	6.848	High	0	85.72	12	0
FALSE	Master Protein	GRMZM2G102779_P01 pep:known chromosome:AGPv3:6:165090982:165093128:-1 gene:GRMZM2G102779 transcript:GRMZM2G102779_T01 description:"cdna	est omrna|protein"	32	13	20	10	1	582	65.1	5.6	2.535	High	0	85.67	13	0
FALSE	Master Protein	GRMZM5G890561_P03	pep:known chromosome:AGPv3:2:177114907:177116705:-1 gene:GRMZM5G890561 transcript:GRMZM5G890561_T03 description:"est"	63	7	24	1	1	112	12.9	10.55	50.795	High	0	85.67	7	6
FALSE	Master Protein	GRMZM2G316113_P01 pep:known chromosome:AGPv3:8:153994750:154008407:1 gene:GRMZM2G316113 transcript:GRMZM2G316113_T01 description:"abinitio	est omrna|protein"	14	12	18	4	1	1391	155.2	6.58	0.532	High	0	85.61	12	8
FALSE	Master Protein	GRMZM5G881950_P02	pep:known chromosome:AGPv3:1:268317860:268325494:1 gene:GRMZM5G881950 transcript:GRMZM5G881950_T02 description:"est"	20	14	19	11	1	981	108.3	5.34	1.121	High	0	85.58	14	3
FALSE	Master Protein	GRMZM5G832672_P02	pep:known chromosome:AGPv3:3:9382254:9386453:1 gene:GRMZM5G832672 transcript:GRMZM5G832672_T02 description:"cdna|est"	32	16	20	16	1	639	68.3	4.72	1.748	High	0	85.49	16	0
FALSE	Master Protein	GRMZM2G156516_P02 pep:known chromosome:AGPv3:1:295613903:295617225:1 gene:GRMZM2G156516 transcript:GRMZM2G156516_T02 description:"cdna	est omrna|protein"	29	7	24	5	1	231	24.7	5.64	3.642	High	0	85.46	7	2
FALSE	Master Protein	GRMZM2G001668_P01 pep:known chromosome:AGPv3:2:170363991:170373719:1 gene:GRMZM2G001668 transcript:GRMZM2G001668_T01 description:"cdna	est omrna|protein"	33	12	21	1	1	368	40.8	6.61	4.926	High	0	85.43	12	11
FALSE	Master Protein	GRMZM2G311919_P01 pep:known chromosome:AGPv3:5:143222807:143237989:-1 gene:GRMZM2G311919 transcript:GRMZM2G311919_T01 description:"cdna	est omrna|protein"	55	12	20	12	1	268	29	8.41	7.733	High	0	85.37	12	0
FALSE	Master Protein	GRMZM2G392649_P01 pep:known chromosome:AGPv3:3:225994253:226006102:-1 gene:GRMZM2G392649 transcript:GRMZM2G392649_T01 description:"abinitio	est protein"	25	17	20	17	1	939	104.1	6.37	1.319	High	0	85.35	17	0
FALSE	Master Protein	GRMZM2G068455_P01	pep:known chromosome:AGPv3:4:83532080:83534403:1 gene:GRMZM2G068455 transcript:GRMZM2G068455_T01 description:"est"	34	11	20	6	1	397	41.6	8.09	2.981	High	0	85.29	11	3
FALSE	Master Protein	GRMZM2G041238_P01 pep:known chromosome:AGPv3:8:13556862:13557847:1 gene:GRMZM2G041238 transcript:GRMZM2G041238_T01 description:"cdna	est omrna|protein"	52	11	24	2	1	157	17.5	11.12	99	High	0	85.25	11	0
FALSE	Master Protein	GRMZM2G016457_P01	pep:known chromosome:AGPv3:3:106399923:106427976:-1 gene:GRMZM2G016457 transcript:GRMZM2G016457_T01 description:"est|mrna"	31	16	22	16	1	543	59.2	9.57	2.875	High	0	85.2	16	0
FALSE	Master Protein	GRMZM2G060045_P01	pep:known chromosome:AGPv3:8:134264001:134276222:-1 gene:GRMZM2G060045 transcript:GRMZM2G060045_T01 description:"est|omrna"	19	19	22	9	1	1325	148.1	9.26	0.653	High	0	85.11	19	10
FALSE	Master Protein	GRMZM2G170842_P01 pep:known chromosome:AGPv3:4:114717582:114722711:-1 gene:GRMZM2G170842 transcript:GRMZM2G170842_T01 description:"cdna	est omrna|protein"	22	11	22	7	1	559	63.1	6.7	1.512	High	0	85.11	11	4
FALSE	Master Protein	GRMZM2G119546_P02	pep:known chromosome:AGPv3:9:82647825:82661487:1 gene:GRMZM2G119546 transcript:GRMZM2G119546_T02 description:"est|omrna"	39	11	20	3	1	306	35.1	5.02	4.623	High	0	85.07	11	4
FALSE	Master Protein	GRMZM2G398755_P01 pep:known chromosome:AGPv3:4:148257670:148265342:1 gene:GRMZM2G398755 transcript:GRMZM2G398755_T01 description:"cdna	est omrna|protein"	26	13	21	1	1	603	66.3	5.96	1.966	High	0	85.06	13	0
FALSE	Master Protein	GRMZM2G120579_P01 pep:known chromosome:AGPv3:5:34629277:34632988:-1 gene:GRMZM2G120579 transcript:GRMZM2G120579_T01 description:"cdna	est omrna|protein"	42	9	21	9	1	277	29.9	5.19	10.548	High	0	85	9	0
FALSE	Master Protein	GRMZM2G054465_P01 pep:known chromosome:AGPv3:9:99494900:99504275:1 gene:GRMZM2G054465 transcript:GRMZM2G054465_T01 description:"abinitio	cdna est|omrna"	31	11	19	11	1	409	44.3	6.52	4.179	High	0	84.98	11	0
FALSE	Master Protein	GRMZM2G088669_P01 pep:known chromosome:AGPv3:6:142098994:142101119:1 gene:GRMZM2G088669 transcript:GRMZM2G088669_T01 description:"cdna	est omrna|protein"	61	5	19	5	1	161	16.9	4.74	30.623	High	0	84.96	5	0
FALSE	Master Protein	GRMZM2G172204_P02 pep:known chromosome:AGPv3:7:26168122:26169874:-1 gene:GRMZM2G172204 transcript:GRMZM2G172204_T02 description:"cdna	est omrna|protein"	27	5	17	5	1	306	32	6.39	5.813	High	0	84.94	5	0
FALSE	Master Protein	GRMZM2G001898_P01 pep:known chromosome:AGPv3:7:13853249:13859639:1 gene:GRMZM2G001898 transcript:GRMZM2G001898_T01 description:"cdna	est omrna|protein"	40	11	22	11	1	400	42.6	6.79	3.365	High	0	84.94	11	0
FALSE	Master Protein	GRMZM2G329047_P01 pep:known chromosome:AGPv3:2:189875814:189876536:1 gene:GRMZM2G329047 transcript:GRMZM2G329047_T01 description:"cdna	est omrna|protein"	23	5	27	3	1	145	15.3	10.1	9	High	0	84.91	5	2
FALSE	Master Protein	GRMZM2G086882_P01 pep:known chromosome:AGPv3:3:112215981:112224895:-1 gene:GRMZM2G086882 transcript:GRMZM2G086882_T01 description:"cdna	est omrna|protein"	49	11	21	3	1	241	26.4	7.81	4.179	High	0	84.86	11	8
FALSE	Master Protein	GRMZM2G180983_P02 pep:known chromosome:AGPv3:5:202139141:202150301:1 gene:GRMZM2G180983 transcript:GRMZM2G180983_T02 description:"cdna	est omrna|protein"	30	10	21	10	1	427	46.8	8.6	3.507	High	0	84.71	10	0
FALSE	Master Protein	GRMZM2G066815_P01	pep:known chromosome:AGPv3:10:125449560:125453832:1 gene:GRMZM2G066815 transcript:GRMZM2G066815_T01 description:"cdna|est"	35	17	23	8	1	527	57.1	9.2	2.257	High	0	84.67	17	0
FALSE	Master Protein	GRMZM2G463032_P01 pep:known chromosome:AGPv3:3:219772224:219780093:1 gene:GRMZM2G463032 transcript:GRMZM2G463032_T01 description:"cdna	est omrna|protein"	24	13	21	6	1	720	77.2	7.62	1.228	High	0	84.64	13	5
FALSE	Master Protein	GRMZM2G044744_P01 pep:known chromosome:AGPv3:8:124838621:124847166:1 gene:GRMZM2G044744 transcript:GRMZM2G044744_T01 description:"est	omrna protein"	21	17	22	17	1	909	103	6.46	1.336	High	0	84.54	17	0
FALSE	Master Protein	GRMZM2G081653_P02 pep:known chromosome:AGPv3:8:137507114:137513406:1 gene:GRMZM2G081653 transcript:GRMZM2G081653_T02 description:"cdna	est omrna|protein"	41	9	19	4	1	279	30.5	7.96	2.981	High	0	84.52	9	5
FALSE	Master Protein	GRMZM2G088627_P01 pep:known chromosome:AGPv3:1:189179282:189183859:-1 gene:GRMZM2G088627 transcript:GRMZM2G088627_T01 description:"cdna	est omrna|protein"	40	14	21	14	1	446	49	5.48	3.771	High	0	84.47	14	0
FALSE	Master Protein	GRMZM2G061988_P01 pep:known chromosome:AGPv3:1:140048503:140065915:-1 gene:GRMZM2G061988 transcript:GRMZM2G061988_T01 description:"abinitio	est omrna|protein"	18	12	22	12	1	791	87.1	8.22	1.342	High	0	84.45	12	0
FALSE	Master Protein	GRMZM2G063244_P01 pep:known chromosome:AGPv3:8:1141430:1145642:1 gene:GRMZM2G063244 transcript:GRMZM2G063244_T01 description:"cdna	est omrna|protein"	40	8	21	7	1	242	26	7.87	4.275	High	0	84.39	8	0
FALSE	Master Protein	GRMZM2G078826_P01 pep:known chromosome:AGPv3:3:226564458:226569877:1 gene:GRMZM2G078826 transcript:GRMZM2G078826_T01 description:"cdna	est omrna|protein"	21	15	23	12	1	802	88.9	9.85	1.387	High	0	84.28	15	2
FALSE	Master Protein	GRMZM2G130544_P02 pep:known chromosome:AGPv3:5:4423400:4425440:1 gene:GRMZM2G130544 transcript:GRMZM2G130544_T02 description:"cdna	est omrna|protein"	48	10	24	1	1	152	17.7	10.74	14.199	High	0	83.93	10	9
FALSE	Master Protein	GRMZM2G056462_P01 pep:known chromosome:AGPv3:1:55444071:55454067:1 gene:GRMZM2G056462 transcript:GRMZM2G056462_T01 description:"cdna	est omrna|protein"	46	13	21	4	1	272	30.7	6.8	5.952	High	0	83.92	13	0
FALSE	Master Protein	GRMZM2G096240_P01 pep:known chromosome:AGPv3:3:11901107:11904525:1 gene:GRMZM2G096240 transcript:GRMZM2G096240_T01 description:"cdna	est omrna|protein"	55	9	21	3	1	146	15.7	5.22	7.254	High	0	83.89	9	6
FALSE	Master Protein	GRMZM2G169593_P01 pep:known chromosome:AGPv3:4:35950140:35954045:-1 gene:GRMZM2G169593 transcript:GRMZM2G169593_T01 description:"abinitio	cdna est"	29	13	19	3	1	474	50.7	7.05	2.162	High	0	83.78	13	0
FALSE	Master Protein	GRMZM2G033493_P01 pep:known chromosome:AGPv3:7:157316562:157321198:-1 gene:GRMZM2G033493 transcript:GRMZM2G033493_T01 description:"cdna	est omrna|protein"	32	9	23	9	1	284	31.9	9.07	6.499	High	0	83.65	9	0
FALSE	Master Protein	AC211394.4_FGP004	pep:known chromosome:AGPv3:9:95254430:95260811:1 gene:AC211394.4_FG004 transcript:AC211394.4_FGT004 description:"est"	34	12	21	12	1	476	55	6.95	2.914	High	0	83.58	12	0
FALSE	Master Protein	GRMZM2G029566_P01 pep:known chromosome:AGPv3:4:233759489:233764651:1 gene:GRMZM2G029566 transcript:GRMZM2G029566_T01 description:"cdna	est omrna|protein"	31	10	20	3	1	427	46.7	5.54	4.275	High	0	83.58	10	7
FALSE	Master Protein	GRMZM2G007012_P01 pep:known chromosome:AGPv3:4:22961047:22962907:1 gene:GRMZM2G007012 transcript:GRMZM2G007012_T01 description:"cdna	est omrna|protein"	30	12	20	9	1	516	55.4	6.01	5.062	High	0	83.52	12	3
FALSE	Master Protein	GRMZM2G073912_P01 pep:known chromosome:AGPv3:1:269283865:269292626:-1 gene:GRMZM2G073912 transcript:GRMZM2G073912_T01 description:"cdna	est omrna|protein"	26	12	19	12	1	594	61.7	5.59	2.275	High	0	83.49	12	0
FALSE	Master Protein	GRMZM2G322328_P01 pep:known chromosome:AGPv3:6:89565447:89571484:1 gene:GRMZM2G322328 transcript:GRMZM2G322328_T01 description:"est	omrna protein"	25	15	22	15	1	584	64.9	7.03	2.621	High	0	83.45	15	0
FALSE	Master Protein	GRMZM2G406672_P01 pep:known chromosome:AGPv3:7:150326974:150337189:-1 gene:GRMZM2G406672 transcript:GRMZM2G406672_T01 description:"cdna	est omrna|protein"	30	15	21	15	1	619	69.1	6.51	1.894	High	0	83.36	15	0
FALSE	Master Protein	GRMZM2G011319_P02 pep:known chromosome:AGPv3:6:75556122:75561732:1 gene:GRMZM2G011319 transcript:GRMZM2G011319_T02 description:"cdna	est omrna|protein"	26	12	21	12	1	661	72.1	6.18	1.783	High	0	83.34	12	0
FALSE	Master Protein	GRMZM2G081155_P02 pep:known chromosome:AGPv3:7:159040158:159065687:-1 gene:GRMZM2G081155 transcript:GRMZM2G081155_T02 description:"cdna	omrna protein"	25	15	20	15	1	655	75.1	5.95	2.275	High	0	83.28	15	0
FALSE	Master Protein	GRMZM2G094224_P01 pep:known chromosome:AGPv3:3:12612506:12613649:-1 gene:GRMZM2G094224 transcript:GRMZM2G094224_T01 description:"cdna	est omrna|protein"	14	5	21	5	1	212	22.5	9.6	5.31	High	0	83.26	5	0
FALSE	Master Protein	GRMZM2G071010_P01 pep:known chromosome:AGPv3:4:221022433:221025423:1 gene:GRMZM2G071010 transcript:GRMZM2G071010_T01 description:"cdna	est omrna|protein"	56	7	21	6	1	148	16.8	6.93	24.119	High	0	83.2	7	3
FALSE	Master Protein	GRMZM2G047855_P01 pep:known chromosome:AGPv3:1:279484878:279490883:-1 gene:GRMZM2G047855 transcript:GRMZM2G047855_T01 description:"cdna	est omrna|protein"	44	13	21	2	1	383	44.1	8.85	5.062	High	0	83.18	13	11
FALSE	Master Protein	GRMZM5G844195_P02	pep:known chromosome:AGPv3:5:3841783:3850283:1 gene:GRMZM5G844195 transcript:GRMZM5G844195_T02 description:"protein"	25	18	23	2	1	803	90.7	5.41	1.601	High	0	83.15	18	0
FALSE	Master Protein	GRMZM2G069298_P01 pep:known chromosome:AGPv3:5:210154373:210155706:-1 gene:GRMZM2G069298 transcript:GRMZM2G069298_T01 description:"est	omrna protein"	39	12	21	1	1	333	37	6.54	5.952	High	0	83.14	12	12
FALSE	Master Protein	GRMZM2G006672_P02	pep:known chromosome:AGPv3:4:131038320:131055437:-1 gene:GRMZM2G006672 transcript:GRMZM2G006672_T02 description:"est"	30	11	21	4	1	373	40.2	8.54	7.733	High	0	83.05	11	1
FALSE	Master Protein	GRMZM2G378717_P01 pep:known chromosome:AGPv3:3:16316432:16321804:1 gene:GRMZM2G378717 transcript:GRMZM2G378717_T01 description:"abinitio	est protein"	35	13	20	13	1	415	47.3	5.77	2.687	High	0	83.05	13	0
FALSE	Master Protein	GRMZM2G143725_P01 pep:known chromosome:AGPv3:10:99117687:99128736:-1 gene:GRMZM2G143725 transcript:GRMZM2G143725_T01 description:"cdna	est omrna|protein"	18	17	22	2	1	1014	111	7.12	1.848	High	0	83.04	17	0
FALSE	Master Protein	AC190628.4_FGP007	pep:novel chromosome:AGPv3:4:181815146:181823634:-1 gene:AC190628.4_FG007 transcript:AC190628.4_FGT007 description:"abinitio"	20	15	22	15	1	887	99.6	6.52	1.093	High	0	83.04	15	0
FALSE	Master Protein	GRMZM2G177781_P01 pep:known chromosome:AGPv3:5:153582672:153591101:1 gene:GRMZM2G177781 transcript:GRMZM2G177781_T01 description:"abinitio	est omrna"	21	12	20	6	1	690	70.1	6.48	4.78	High	0	83.03	12	0
FALSE	Master Protein	GRMZM2G147884_P01 pep:known chromosome:AGPv3:2:38761024:38770972:1 gene:GRMZM2G147884 transcript:GRMZM2G147884_T01 description:"cdna	est omrna|protein"	29	17	20	17	1	780	86.4	7.24	1.415	High	0	82.98	17	0
FALSE	Master Protein	GRMZM2G357620_P01 pep:known chromosome:AGPv3:4:187117290:187123420:1 gene:GRMZM2G357620 transcript:GRMZM2G357620_T01 description:"cdna	est omrna|protein"	19	18	22	12	1	1042	113.5	5.97	1.126	High	0	82.84	18	7
FALSE	Master Protein	GRMZM2G374881_P02	pep:known chromosome:AGPv3:9:20980862:20984527:1 gene:GRMZM2G374881 transcript:GRMZM2G374881_T02 description:"est"	64	12	21	1	1	243	25.9	5.58	9	High	0	82.77	12	0
FALSE	Master Protein	GRMZM2G150796_P01 pep:known chromosome:AGPv3:7:129134063:129145654:-1 gene:GRMZM2G150796 transcript:GRMZM2G150796_T01 description:"cdna	omrna protein"	22	15	21	15	1	777	87	6.92	1.644	High	0	82.75	15	0
FALSE	Master Protein	GRMZM2G056661_P01	pep:known chromosome:AGPv3:5:113766130:113816550:1 gene:GRMZM2G056661 transcript:GRMZM2G056661_T01 description:"est"	12	21	23	9	1	1967	221.7	6.74	0.525	High	0	82.72	21	12
FALSE	Master Protein	GRMZM2G111411_P01 pep:known chromosome:AGPv3:8:115006181:115009772:1 gene:GRMZM2G111411 transcript:GRMZM2G111411_T01 description:"cdna	est omrna|protein"	43	11	22	5	1	221	23.8	4.87	7.577	High	0	82.71	11	6
FALSE	Master Protein	GRMZM2G058745_P01 pep:known chromosome:AGPv3:8:124182497:124187982:1 gene:GRMZM2G058745 transcript:GRMZM2G058745_T01 description:"cdna	est omrna|protein"	40	14	20	8	1	509	54.8	6.62	3.175	High	0	82.68	14	0
FALSE	Master Protein	GRMZM2G005024_P01 pep:known chromosome:AGPv3:10:84247242:84250053:-1 gene:GRMZM2G005024 transcript:GRMZM2G005024_T01 description:"abinitio	cdna est|omrna"	29	13	19	3	1	479	51.1	7.15	2.162	High	0	82.66	13	10
FALSE	Master Protein	GRMZM2G442658_P02 pep:known chromosome:AGPv3:1:274050283:274053933:-1 gene:GRMZM2G442658 transcript:GRMZM2G442658_T02 description:"cdna	omrna protein"	47	14	21	8	1	379	40.9	6.73	4.484	High	0	82.61	14	6
FALSE	Master Protein	GRMZM2G023591_P01 pep:known chromosome:AGPv3:1:182127163:182129032:-1 gene:GRMZM2G023591 transcript:GRMZM2G023591_T01 description:"cdna	est omrna|protein"	39	9	22	9	1	275	30	8.54	6.627	High	0	82.6	9	0
FALSE	Master Protein	GRMZM2G107444_P01 pep:known chromosome:AGPv3:5:24175090:24178168:1 gene:GRMZM2G107444 transcript:GRMZM2G107444_T01 description:"cdna	est omrna|protein"	55	11	19	8	1	232	24.6	4.61	19.309	High	0	82.56	11	4
FALSE	Master Protein	GRMZM2G122787_P02 pep:known chromosome:AGPv3:1:11527023:11532525:-1 gene:GRMZM2G122787 transcript:GRMZM2G122787_T02 description:"cdna	est omrna|protein"	31	12	20	12	1	555	59.4	7.36	3.047	High	0	82.51	12	0
FALSE	Master Protein	GRMZM2G456835_P01 pep:known chromosome:AGPv3:8:135307883:135314644:1 gene:GRMZM2G456835 transcript:GRMZM2G456835_T01 description:"abinitio	cdna est|omrna|protein"	42	5	18	1	1	246	27.1	5.35	1.955	High	0	82.51	5	0
FALSE	Master Protein	GRMZM2G067511_P01 pep:known chromosome:AGPv3:3:38428315:38432905:1 gene:GRMZM2G067511 transcript:GRMZM2G067511_T01 description:"cdna	est omrna|protein"	50	10	19	1	1	149	16.8	4.27	14.849	High	0	82.36	10	0
FALSE	Master Protein	GRMZM2G053803_P02	pep:known chromosome:AGPv3:1:296082219:296088796:-1 gene:GRMZM2G053803 transcript:GRMZM2G053803_T02 description:"est"	26	16	23	11	1	659	72	5.24	1.918	High	0	82.31	16	5
FALSE	Master Protein	GRMZM5G834758_P03	pep:known chromosome:AGPv3:5:63828350:63830554:-1 gene:GRMZM5G834758 transcript:GRMZM5G834758_T03 description:"est"	37	12	23	12	1	220	24.4	8.92	12.895	High	0	82.3	12	0
FALSE	Master Protein	GRMZM2G167156_P02 pep:known chromosome:AGPv3:9:14827663:14831226:-1 gene:GRMZM2G167156 transcript:GRMZM2G167156_T02 description:"cdna	est omrna|protein"	33	14	22	14	1	470	50	7.06	3.175	High	0	82.3	14	0
FALSE	Master Protein	GRMZM2G019958_P01 pep:known chromosome:AGPv3:5:8824864:8833622:1 gene:GRMZM2G019958 transcript:GRMZM2G019958_T01 description:"cdna	est protein"	28	7	18	7	1	261	27.8	8.54	5.31	High	0	82.22	7	0
FALSE	Master Protein	GRMZM2G072865_P01 pep:known chromosome:AGPv3:5:190605604:190612676:1 gene:GRMZM2G072865 transcript:GRMZM2G072865_T01 description:"cdna	est omrna|protein"	26	20	21	7	1	809	87.3	8.46	1.534	High	0	82.2	20	13
FALSE	Master Protein	GRMZM2G165901_P01 pep:known chromosome:AGPv3:5:14084193:14085595:-1 gene:GRMZM2G165901 transcript:GRMZM2G165901_T01 description:"cdna	est omrna"	65	11	18	10	1	159	15.5	5.6	26.826	High	0	82.16	11	1
FALSE	Master Protein	GRMZM2G042502_P01 pep:known chromosome:AGPv3:4:162106556:162112911:-1 gene:GRMZM2G042502 transcript:GRMZM2G042502_T01 description:"cdna	est omrna|protein"	34	17	20	13	1	616	67.1	7.49	2.371	High	0	82.15	17	4
FALSE	Master Protein	GRMZM2G117642_P02 pep:known chromosome:AGPv3:7:153136076:153138811:1 gene:GRMZM2G117642 transcript:GRMZM2G117642_T02 description:"cdna	est omrna|protein"	54	9	20	9	1	179	18.9	9.45	5.494	High	0	82.14	9	0
FALSE	Master Protein	GRMZM5G848696_P02	pep:known chromosome:AGPv3:3:219780649:219783555:-1 gene:GRMZM5G848696 transcript:GRMZM5G848696_T02 description:"est"	38	10	19	10	1	378	39.4	8.79	3.642	High	0	82.13	10	0
FALSE	Master Protein	GRMZM5G871419_P05	pep:known chromosome:AGPv3:1:227990522:227996740:-1 gene:GRMZM5G871419 transcript:GRMZM5G871419_T05 description:"mrna"	28	16	22	11	1	770	84.3	7.5	1.283	High	0	82.08	16	5
FALSE	Master Protein	GRMZM2G412229_P01 pep:known chromosome:AGPv3:5:12581434:12587551:-1 gene:GRMZM2G412229 transcript:GRMZM2G412229_T01 description:"cdna	est omrna|protein"	34	11	19	2	1	386	40.8	9.55	4.012	High	0	82.06	11	0
FALSE	Master Protein	GRMZM2G072909_P01 pep:known chromosome:AGPv3:9:65141981:65155649:1 gene:GRMZM2G072909 transcript:GRMZM2G072909_T01 description:"cdna	est omrna|protein"	33	11	19	11	1	437	46.7	7.96	2.631	High	0	82.05	11	0
FALSE	Master Protein	GRMZM2G450937_P04 pep:known chromosome:AGPv3:4:237851280:237853690:1 gene:GRMZM2G450937 transcript:GRMZM2G450937_T04 description:"cdna	est protein"	39	9	24	2	1	207	24.1	11.44	58.948	High	0	81.95	9	0
FALSE	Master Protein	GRMZM2G109560_P01 pep:known chromosome:AGPv3:7:143360732:143369569:-1 gene:GRMZM2G109560 transcript:GRMZM2G109560_T01 description:"cdna	est omrna|protein"	27	17	20	17	1	885	97.7	7.88	1.099	High	0	81.95	17	0
FALSE	Master Protein	GRMZM2G432390_P01 pep:known chromosome:AGPv3:3:162856566:162861833:1 gene:GRMZM2G432390 transcript:GRMZM2G432390_T01 description:"cdna	est protein"	25	14	21	14	1	536	58.6	9.47	2.282	High	0	81.9	14	0
FALSE	Master Protein	GRMZM2G091419_P01 pep:known chromosome:AGPv3:8:163288195:163292627:1 gene:GRMZM2G091419 transcript:GRMZM2G091419_T01 description:"cdna	est omrna|protein"	33	17	21	17	1	656	77.9	5.74	1.976	High	0	81.88	17	0
FALSE	Master Protein	GRMZM2G352855_P04 pep:known chromosome:AGPv3:2:167872593:167874820:1 gene:GRMZM2G352855 transcript:GRMZM2G352855_T04 description:"cdna	est omrna|protein"	39	12	18	12	1	439	49	8.57	3.125	High	0	81.87	12	0
FALSE	Master Protein	GRMZM5G850355_P01	pep:known chromosome:AGPv3:4:145387421:145404165:1 gene:GRMZM5G850355 transcript:GRMZM5G850355_T01 description:"oprotein"	47	9	19	2	1	235	25.9	5.68	9	High	0	81.86	9	0
FALSE	Master Protein	GRMZM2G159777_P01 pep:known chromosome:AGPv3:9:144054835:144061089:1 gene:GRMZM2G159777 transcript:GRMZM2G159777_T01 description:"cdna	est protein"	44	13	23	4	1	326	36.6	9.11	5.579	High	0	81.8	13	10
FALSE	Master Protein	GRMZM2G112336_P01 pep:known chromosome:AGPv3:8:79738618:79744724:1 gene:GRMZM2G112336 transcript:GRMZM2G112336_T01 description:"cdna	est protein"	19	17	22	14	1	1075	121.1	7.09	0.981	High	0	81.79	17	3
FALSE	Master Protein	GRMZM2G026371_P01 pep:known chromosome:AGPv3:3:218339104:218342590:-1 gene:GRMZM2G026371 transcript:GRMZM2G026371_T01 description:"est	omrna protein"	31	15	20	9	1	586	64.7	9.41	1.661	High	0	81.79	15	6
FALSE	Master Protein	GRMZM2G100084_P01 pep:novel chromosome:AGPv3:1:276499945:276504457:-1 gene:GRMZM2G100084 transcript:GRMZM2G100084_T01 description:"cdna	est omrna|protein"	33	12	18	3	1	501	52.5	6.28	4.623	High	0	81.75	12	0
FALSE	Master Protein	GRMZM5G824831_P02	pep:known chromosome:AGPv3:5:188294106:188340850:-1 gene:GRMZM5G824831 transcript:GRMZM5G824831_T02 description:"est"	47	9	19	2	1	235	25.8	5.68	9	High	0	81.74	9	7
FALSE	Master Protein	GRMZM2G401664_P01 pep:known chromosome:AGPv3:7:143856270:143858096:-1 gene:GRMZM2G401664 transcript:GRMZM2G401664_T01 description:"cdna	est omrna|protein"	43	12	21	12	1	333	37.3	7.5	4.179	High	0	81.72	12	0
FALSE	Master Protein	GRMZM2G008507_P01 pep:known chromosome:AGPv3:4:10486291:10492230:-1 gene:GRMZM2G008507 transcript:GRMZM2G008507_T01 description:"est	omrna protein"	17	15	22	12	1	1051	114.2	7.09	0.941	High	0	81.69	15	0
FALSE	Master Protein	GRMZM2G324540_P01	pep:known chromosome:AGPv3:5:30760520:30770795:1 gene:GRMZM2G324540 transcript:GRMZM2G324540_T01 description:"est"	32	16	22	4	1	526	57.6	6.33	3.394	High	0	81.62	16	0
FALSE	Master Protein	GRMZM2G008410_P01 pep:known chromosome:AGPv3:4:170362273:170369183:-1 gene:GRMZM2G008410 transcript:GRMZM2G008410_T01 description:"cdna	est omrna|protein"	48	13	19	9	1	344	37	6.18	5.449	High	0	81.54	13	4
FALSE	Master Protein	GRMZM2G154628_P01 pep:known chromosome:AGPv3:5:195239679:195242694:1 gene:GRMZM2G154628 transcript:GRMZM2G154628_T01 description:"cdna	est omrna|protein"	25	5	20	2	1	288	30.3	7.01	5.31	High	0	81.53	5	0
FALSE	Master Protein	GRMZM2G079236_P01 pep:known chromosome:AGPv3:2:150152533:150159396:-1 gene:GRMZM2G079236 transcript:GRMZM2G079236_T01 description:"cdna	est protein"	23	13	21	6	1	726	79.9	7.43	1.801	High	0	81.52	13	6
FALSE	Master Protein	GRMZM2G043737_P01 pep:known chromosome:AGPv3:10:116881112:116883547:1 gene:GRMZM2G043737 transcript:GRMZM2G043737_T01 description:"cdna	est protein"	49	7	20	2	1	166	18.9	9.82	14.199	High	0	81.46	7	0
FALSE	Master Protein	GRMZM2G139617_P01 pep:known chromosome:AGPv3:3:158390857:158397844:1 gene:GRMZM2G139617 transcript:GRMZM2G139617_T01 description:"cdna	est omrna|protein"	29	15	22	15	1	502	54.8	8.62	2.914	High	0	81.46	15	0
FALSE	Master Protein	GRMZM2G055899_P01	pep:known chromosome:AGPv3:9:155224395:155234496:1 gene:GRMZM2G055899 transcript:GRMZM2G055899_T01 description:"est|omrna"	31	13	21	9	1	404	43.7	7.87	2.775	High	0	81.41	13	0
FALSE	Master Protein	GRMZM2G060561_P02 pep:known chromosome:AGPv3:5:93267547:93273609:-1 gene:GRMZM2G060561 transcript:GRMZM2G060561_T02 description:"est	omrna protein"	9	10	20	3	1	988	109.5	6.51	0.633	High	0	81.4	10	0
FALSE	Master Protein	GRMZM2G181336_P03 pep:known chromosome:AGPv3:4:175751785:175753487:-1 gene:GRMZM2G181336 transcript:GRMZM2G181336_T03 description:"cdna	est omrna|protein"	52	6	22	2	1	112	12.8	10.52	12.335	High	0	81.38	6	0
FALSE	Master Protein	GRMZM2G128665_P01 pep:known chromosome:AGPv3:1:26825757:26828101:-1 gene:GRMZM2G128665 transcript:GRMZM2G128665_T01 description:"cdna	est omrna|protein"	27	18	21	18	1	691	75.5	7.09	2.36	High	0	81.34	18	0
FALSE	Master Protein	GRMZM2G702426_P01	pep:known chromosome:AGPv3:4:44088617:44091066:-1 gene:GRMZM2G702426 transcript:GRMZM2G702426_T01 description:"cdna"	50	8	18	6	1	171	19.5	10.26	9	High	0	81.32	8	3
FALSE	Master Protein	AC196426.3_FGP007	pep:novel chromosome:AGPv3:8:138548951:138555034:-1 gene:AC196426.3_FG007 transcript:AC196426.3_FGT007 description:"abinitio"	27	16	20	11	1	744	83.4	5.66	1.342	High	0	81.32	16	5
FALSE	Master Protein	GRMZM2G119499_P01 pep:known chromosome:AGPv3:1:7819661:7821095:-1 gene:GRMZM2G119499 transcript:GRMZM2G119499_T01 description:"cdna	est omrna|protein"	50	13	21	11	1	329	36.6	7.68	7.859	High	0	81.29	13	2
FALSE	Master Protein	GRMZM2G044143_P01 pep:novel chromosome:AGPv3:2:19611957:19650488:1 gene:GRMZM2G044143 transcript:GRMZM2G044143_T01 description:"cdna	est omrna|protein"	11	19	20	19	1	2849	309.9	5.96	0.344	High	0	81.25	19	0
FALSE	Master Protein	GRMZM2G112728_P05 pep:known chromosome:AGPv3:1:11107901:11111899:1 gene:GRMZM2G112728 transcript:GRMZM2G112728_T05 description:"cdna	est protein"	24	7	17	4	1	424	45.9	6.16	2.162	High	0	81.24	7	0
FALSE	Master Protein	GRMZM5G863152_P02	pep:known chromosome:AGPv3:7:30671382:30693508:1 gene:GRMZM5G863152 transcript:GRMZM5G863152_T02 description:"est"	48	17	20	17	1	414	46	8.21	4.055	High	0	81.23	17	0
FALSE	Master Protein	GRMZM2G082529_P01 pep:known chromosome:AGPv3:1:227894411:227900098:1 gene:GRMZM2G082529 transcript:GRMZM2G082529_T01 description:"cdna	est omrna|protein"	23	19	24	19	1	868	95.3	6.74	1.467	High	0	81.2	19	0
FALSE	Master Protein	GRMZM2G133937_P01 pep:known chromosome:AGPv3:4:239005571:239015741:1 gene:GRMZM2G133937 transcript:GRMZM2G133937_T01 description:"cdna	est omrna|protein"	16	20	21	20	1	1624	180.7	6.3	0.641	High	0	81.18	20	0
FALSE	Master Protein	GRMZM2G427451_P01 pep:known chromosome:AGPv3:1:191926609:191928004:1 gene:GRMZM2G427451 transcript:GRMZM2G427451_T01 description:"cdna	est omrna|protein"	28	6	17	6	1	258	25.1	9.35	7.254	High	0	81.08	6	0
FALSE	Master Protein	GRMZM2G088880_P03 pep:known chromosome:AGPv3:5:81301898:81304029:1 gene:GRMZM2G088880 transcript:GRMZM2G088880_T03 description:"cdna	est protein"	52	7	21	7	1	95	10.6	10.29	70.969	High	0	81.04	7	0
FALSE	Master Protein	GRMZM2G081037_P02	pep:known chromosome:AGPv3:4:156981540:156986068:1 gene:GRMZM2G081037 transcript:GRMZM2G081037_T02 description:"cdna|est"	52	16	20	16	1	384	42.7	6.48	5.19	High	0	81.04	16	0
FALSE	Master Protein	GRMZM2G110952_P03 pep:known chromosome:AGPv3:5:2576386:2593933:1 gene:GRMZM2G110952 transcript:GRMZM2G110952_T03 description:"abinitio	est omrna"	6	8	19	8	1	1166	131.6	8.66	0.543	High	0	81.03	8	0
FALSE	Master Protein	GRMZM2G128114_P01	pep:known chromosome:AGPv3:5:86223079:86259405:1 gene:GRMZM2G128114 transcript:GRMZM2G128114_T01 description:"est"	29	11	20	1	1	521	55.5	7.08	1.943	High	0	81.02	11	0
FALSE	Master Protein	GRMZM2G146358_P01 pep:known chromosome:AGPv3:9:12027561:12030163:1 gene:GRMZM2G146358 transcript:GRMZM2G146358_T01 description:"cdna	est omrna|protein"	29	8	23	2	1	251	28.8	11.27	16.783	High	0	80.96	8	0
FALSE	Master Protein	GRMZM2G032253_P01 pep:known chromosome:AGPv3:7:149600574:149602395:1 gene:GRMZM2G032253 transcript:GRMZM2G032253_T01 description:"cdna	est omrna|protein"	50	5	16	5	1	191	20.8	7.66	20.544	High	0	80.95	5	0
FALSE	Master Protein	GRMZM5G868757_P05	pep:known chromosome:AGPv3:1:105159679:105163813:-1 gene:GRMZM5G868757 transcript:GRMZM5G868757_T05 description:"cdna|est"	19	9	20	2	1	441	49.6	5.71	2.481	High	0	80.94	9	0
FALSE	Master Protein	GRMZM2G155323_P01 pep:known chromosome:AGPv3:1:268022201:268032707:1 gene:GRMZM2G155323 transcript:GRMZM2G155323_T01 description:"abinitio	est omrna"	30	13	19	8	1	606	65.7	6.62	1.637	High	0	80.84	13	5
FALSE	Master Protein	GRMZM2G126435_P01 pep:known chromosome:AGPv3:6:131639053:131647413:-1 gene:GRMZM2G126435 transcript:GRMZM2G126435_T01 description:"cdna	est omrna|protein"	31	15	20	15	1	483	54.6	6.06	3.642	High	0	80.83	15	0
FALSE	Master Protein	GRMZM2G139341_P01 pep:known chromosome:AGPv3:4:238485504:238492301:1 gene:GRMZM2G139341 transcript:GRMZM2G139341_T01 description:"cdna	est omrna|protein"	29	16	20	16	1	676	72.6	6.61	1.834	High	0	80.8	16	0
FALSE	Master Protein	GRMZM2G458549_P01 pep:known chromosome:AGPv3:1:295530301:295537431:-1 gene:GRMZM2G458549 transcript:GRMZM2G458549_T01 description:"abinitio	cdna est|omrna|protein"	25	13	19	13	1	592	63.9	8.18	2.808	High	0	80.79	13	0
FALSE	Master Protein	GRMZM2G029856_P01 pep:known chromosome:AGPv3:9:106070512:106072600:1 gene:GRMZM2G029856 transcript:GRMZM2G029856_T01 description:"cdna	est omrna|protein"	40	12	18	12	1	376	40.5	7.65	3.642	High	0	80.78	12	0
FALSE	Master Protein	GRMZM2G156365_P04 pep:known chromosome:AGPv3:2:12031263:12034674:-1 gene:GRMZM2G156365 transcript:GRMZM2G156365_T04 description:"est	omrna protein"	29	13	21	13	1	519	56.6	8.94	2.398	High	0	80.78	13	0
FALSE	Master Protein	GRMZM2G168706_P04	pep:known chromosome:AGPv3:2:203612548:203616615:-1 gene:GRMZM2G168706 transcript:GRMZM2G168706_T04 description:"omrna|protein"	31	13	18	12	1	531	59.3	6.29	1.943	High	0	80.75	13	0
FALSE	Master Protein	GRMZM2G052610_P01 pep:known chromosome:AGPv3:7:141917455:141921936:1 gene:GRMZM2G052610 transcript:GRMZM2G052610_T01 description:"cdna	est omrna|protein"	30	5	18	5	1	229	25.5	8.84	3.924	High	0	80.75	5	0
FALSE	Master Protein	GRMZM2G136262_P01 pep:known chromosome:AGPv3:3:133233302:133237193:-1 gene:GRMZM2G136262 transcript:GRMZM2G136262_T01 description:"cdna	est protein"	21	3	21	1	1	140	15	5.55	4.012	High	0	80.73	3	3
FALSE	Master Protein	GRMZM2G053554_P01 pep:known chromosome:AGPv3:7:173020722:173025426:1 gene:GRMZM2G053554 transcript:GRMZM2G053554_T01 description:"cdna	est omrna|protein"	26	13	24	10	1	425	46.9	6.43	3.394	High	0	80.72	13	2
FALSE	Master Protein	GRMZM2G113325_P01 pep:known chromosome:AGPv3:5:174335633:174342252:1 gene:GRMZM2G113325 transcript:GRMZM2G113325_T01 description:"cdna	est omrna|protein"	23	12	20	12	1	589	65.5	6.24	1.88	High	0	80.63	12	0
FALSE	Master Protein	GRMZM2G105991_P01 pep:known chromosome:AGPv3:3:114370775:114372855:-1 gene:GRMZM2G105991 transcript:GRMZM2G105991_T01 description:"cdna	est omrna|protein"	28	11	18	11	1	471	49.8	5.94	3.786	High	0	80.54	11	0
FALSE	Master Protein	GRMZM2G004997_P02	pep:known chromosome:AGPv3:4:26320085:26324458:1 gene:GRMZM2G004997 transcript:GRMZM2G004997_T02 description:"est|mrna"	33	16	20	13	1	594	65.1	6.09	3.417	High	0	80.54	16	4
FALSE	Master Protein	GRMZM2G140116_P01 pep:known chromosome:AGPv3:2:197884434:197885893:1 gene:GRMZM2G140116 transcript:GRMZM2G140116_T01 description:"cdna	est protein"	58	11	23	2	1	134	15.3	10.17	45.416	High	0	80.49	11	0
FALSE	Master Protein	GRMZM2G044681_P01 pep:known chromosome:AGPv3:2:54657021:54672194:1 gene:GRMZM2G044681 transcript:GRMZM2G044681_T01 description:"est	omrna protein"	20	20	21	1	1	1103	123.3	5.85	0.957	High	0	80.4	20	0
FALSE	Master Protein	GRMZM2G040300_P02 pep:known chromosome:AGPv3:2:2050293:2053930:-1 gene:GRMZM2G040300 transcript:GRMZM2G040300_T02 description:"cdna	est omrna|protein"	44	9	17	9	1	303	33.1	6.14	4.456	High	0	80.36	9	0
FALSE	Master Protein	GRMZM2G069708_P01 pep:known chromosome:AGPv3:2:61285692:61289836:-1 gene:GRMZM2G069708 transcript:GRMZM2G069708_T01 description:"cdna	est omrna|protein"	43	9	20	9	1	306	32.6	8.21	5.31	High	0	80.31	9	0
FALSE	Master Protein	GRMZM2G167872_P01 pep:known chromosome:AGPv3:8:156405025:156408391:1 gene:GRMZM2G167872 transcript:GRMZM2G167872_T01 description:"cdna	est omrna|protein"	41	16	21	16	1	396	43.9	6	4.623	High	0	80.3	16	0
FALSE	Master Protein	GRMZM2G015384_P02	pep:known chromosome:AGPv3:1:2874145:2894252:-1 gene:GRMZM2G015384 transcript:GRMZM2G015384_T02 description:"est|mrna"	41	14	23	14	1	443	48.8	5.24	3.262	High	0	80.28	14	0
FALSE	Master Protein	GRMZM2G114739_P01 pep:known chromosome:AGPv3:1:193898445:193902203:1 gene:GRMZM2G114739 transcript:GRMZM2G114739_T01 description:"cdna	est protein"	41	15	22	15	1	397	43.9	6.8	3.894	High	0	80.11	15	0
FALSE	Master Protein	GRMZM2G081955_P01 pep:known chromosome:AGPv3:5:183533765:183536017:1 gene:GRMZM2G081955 transcript:GRMZM2G081955_T01 description:"cdna	est omrna|protein"	35	9	17	9	1	390	42.5	5.17	2.675	High	0	80.02	9	0
FALSE	Master Protein	AC217358.3_FGP005	pep:known chromosome:AGPv3:1:296971341:296973619:-1 gene:AC217358.3_FG005 transcript:AC217358.3_FGT005 description:"abinitio"	32	7	18	7	1	289	31.9	9.69	2.981	High	0	79.96	7	0
FALSE	Master Protein	GRMZM2G053781_P01 pep:known chromosome:AGPv3:7:94538520:94543327:1 gene:GRMZM2G053781 transcript:GRMZM2G053781_T01 description:"cdna	est omrna|protein"	30	16	20	10	1	615	68.9	8.88	2.162	High	0	79.89	16	6
FALSE	Master Protein	GRMZM2G028346_P01 pep:novel chromosome:AGPv3:8:170740197:170743502:-1 gene:GRMZM2G028346 transcript:GRMZM2G028346_T01 description:"est	omrna protein"	48	11	20	2	1	227	25.1	7.08	7.733	High	0	79.87	11	0
FALSE	Master Protein	GRMZM2G170812_P01 pep:known chromosome:AGPv3:9:128920488:128924607:1 gene:GRMZM2G170812 transcript:GRMZM2G170812_T01 description:"cdna	est omrna|protein"	41	11	20	11	1	336	36.2	8.68	3.806	High	0	79.74	11	0
FALSE	Master Protein	GRMZM5G845755_P02	pep:known chromosome:AGPv3:7:2138862:2144213:-1 gene:GRMZM5G845755 transcript:GRMZM5G845755_T02 description:"est"	47	12	20	4	1	332	39.3	8.69	6.079	High	0	79.72	12	0
FALSE	Master Protein	GRMZM2G091383_P01 pep:known chromosome:AGPv3:5:151669661:151671447:1 gene:GRMZM2G091383 transcript:GRMZM2G091383_T01 description:"cdna	est omrna|protein"	37	6	18	3	1	137	15.7	10.71	30.623	High	0	79.68	6	0
[truncated: 6,736 more rows]
