# Supplementary material for: Comparative Proteomics Combined with Morphophysiological Analysis Revealed Chilling Response Patterns in Two Contrasting Maize Genotypes
Source: Cells. 2022 Apr 13;11(8):1321. doi: 10.3390/cells11081321 (PMC9024610; doi:10.3390/cells11081321)
Supplement: Supplementary file 1 [file cells-11-01321-s001.zip › Table S3.xlsx]

## Sheet: Anundance
Supplemental Table S3
Protein abundance of the tolerant line KR701 and sensitive line hei8834 at the first leaf and third leaf stage.
Accession Number	first leaf stage												third leaf stage
	log2(Abundance)-KR701(-)-rep1	log2(Abundance)-KR701(-)-rep2	log2(Abundance)-KR701(-)-rep3	log2(Abundance)-KR701(+)-rep1	log2(Abundance)-KR701(+)-rep2	log2(Abundance)-KR701(+)-rep3	log2(Abundance)-hei8834(-)-rep1	log2(Abundance)-hei8834(-)-rep2	log2(Abundance)-hei8834(-)-rep3	log2(Abundance)-hei8834(+)-rep1	log2(Abundance)-hei8834(+)-rep2	log2(Abundance)-hei8834(+)-rep3	log2(Abundance)-KR701(-)-rep1	log2(Abundance)-KR701(-)-rep2	log2(Abundance)-KR701(-)-rep3	log2(Abundance)-KR701(+)-rep1	log2(Abundance)-KR701(+)-rep2	log2(Abundance)-KR701(+)-rep3	log2(Abundance)-hei8834(-)-rep1	log2(Abundance)-hei8834(-)-rep2	log2(Abundance)-hei8834(-)-rep3	log2(Abundance)-hei8834(+)-rep1	log2(Abundance)-hei8834(+)-rep2	log2(Abundance)-hei8834(+)-rep3
GRMZM2G083841_P01	197.866	200.095	201.083	171.469	175.633	180.388	187.213	189.661	184.389	173.819	178.923	177.139	232.43	237.394	253.197	211.79	220.682	226.267	219.858	219.875	219.138	196.554	204.737	203.399
GRMZM2G448344_P01	147.334	161.324	150.362	117.359	127.686	122.285	134.366	148.391	133.727	116.507	128.757	117.349	145.601	161.665	158.951	138.228	154.428	142.422	140.843	150.306	139.629	134.762	151.442	141.275
GRMZM5G808402_P01	115.215	108.04	102.592	99.1015	91.3426	87.5599	116.316	102.788	101.749	104.248	95.6096	91.4194	116.791	108.707	109.312	112.873	102.841	107.18	116.78	102.015	101.51	112.676	103.656	100.678
GRMZM2G306345_P05	113.279	132.335	123.877	100.535	107.009	103.896	118.414	136.869	125.449	102.412	115.819	112.982	112.485	128.405	128.557	104.968	117.193	113.556	117.147	121.997	121.406	111.76	124.373	122.279
GRMZM2G097457_P01	60.7918	68.1871	63.7891	49.4856	53.7348	50.7713	78.5412	87.4389	82.2752	63.8904	67.0088	65.2746	67.7329	74.398	70.7494	59.802	62.6219	60.5298	75.1229	80.802	78.5742	75.6332	80.8086	78.0363
GRMZM2G089136_P01	61.4007	57.5276	56.8817	51.3984	48.1897	48.4933	63.1788	59.2661	56.3334	56.2132	53.1435	51.7548	65.6656	63.5281	63.4273	58.3151	57.0276	55.4346	66.4721	62.4524	59.4027	63.356	60.8651	58.2722
GRMZM5G845611_P01	58.3033	51.9497	55.5304	43.7731	40.1879	41.1752	73.5994	64.1515	67.2378	57.6787	49.8634	53.0761	69.1037	58.9436	65.7233	55.2335	49.3146	51.6721	78.2602	65.1092	68.1886	71.0481	61.4802	64.3966
GRMZM2G085019_P01	60.2227	53.6981	51.1142	49.7025	45.5939	43.5014	59.6088	55.831	52.5831	53.6048	50.0416	46.9444	66.5691	60.0328	60.3608	59.0302	53.8638	52.0986	66.6813	59.3111	57.7785	61.5806	55.6279	55.6189
GRMZM5G808939_P01	63.0869	65.4208	56.4181	49.1756	49.9281	44.8787	58.8989	59.3542	51.5661	47.9745	50.1736	43.9037	66.8237	66.9326	62.1534	58.149	59.6385	54.1871	59.5217	58.7922	52.7992	56.3696	58.7599	52.0937
GRMZM2G121878_P01	60.7974	64.4727	61.41	44.6099	51.1791	50.3115	56.3652	60.8021	56.4476	43.0206	48.9625	46.8409	60.8934	66.3373	64.812	53.7622	60.6652	57.3152	53.6723	56.4079	54.6498	51.879	56.1732	54.2129
GRMZM2G015419_P02	49.2902	44.5984	46.5081	53.7246	48.1705	51.4872	47.8137	44.1818	44.3505	47.5772	43.8937	45.1712	42.3032	39.6391	41.7043	44.6965	42.2495	43.7835	45.8256	41.2966	43.3363	44.7689	41.9703	43.659
GRMZM2G337113_P02	59.1315	58.9924	60.481	41.4652	42.9074	43.5109	60.4595	62.1434	59.7573	46.9782	47.7029	49.056	61.9942	62.5515	64.4589	51.7533	55.3913	52.8663	59.6745	59.8807	58.531	57.5437	59.4305	59.3385
GRMZM2G001696_P01	43.4349	47.7009	44.7773	34.9677	37.8034	35.786	41.0089	45.548	41.7025	34.1102	37.683	35.3064	49.097	54.227	52.3119	43.8658	49.9983	45.871	45.3567	48.6835	45.5751	44.1588	48.3559	44.6697
GRMZM2G113349_P01	40.4973	38.9309	41.4688	34.3753	32.2498	32.397	49.2362	48.3787	55.9554	34.0032	39.1588	36.8246	45.1589	40.7701	47.2376	38.3846	39.8151	39.3029	44.2186	44.936	45.6923	42.1259	41.7605	46.1213
GRMZM2G033208_P02	42.295	35.459	34.2824	34.6382	29.766	27.0808	46.2514	40.6265	38.2631	39.9917	35.9482	33.0071	44.4095	37.5716	36.6234	39.8322	34.4842	32.3402	49.6833	41.2933	38.7168	48.8987	41.8514	39.6862
GRMZM2G098520_P01	38.2129	39.2877	38.1231	33.7502	33.2343	34.779	36.8741	35.6533	36.92	33.9317	36.3401	35.5467	35.6185	39.1064	39.5399	34.3931	35.3293	37.1337	35.6298	35.9813	37.4068	34.5898	34.0676	35.5507
GRMZM2G046284_P01	35.356	37.3115	36.17	33.7853	33.2133	31.9456	36.1007	37.0253	32.596	35.5607	38.918	32.7009	39.5773	41.2915	41.6499	37.0607	39.7498	39.0691	40.2974	43.8061	38.583	37.2619	41.6845	36.2854
GRMZM2G083716_P02	36.0096	37.1919	38.9204	40.6951	41.929	41.5711	37.5775	40.2355	38.9818	43.5851	44.4183	44.6515	31.7541	34.035	36.6687	34.4273	36.1924	36.872	35.6412	37.8783	38.2299	37.3101	38.1197	39.1046
GRMZM2G059083_P01	39.274	39.9216	40.5177	30.946	31.7794	31.0867	37.6654	39.0505	37.4348	32.1954	34.8383	32.7787	39.7659	43.0132	42.705	37.3843	39.7662	38.0014	37.9231	38.7929	37.5972	35.846	38.8379	37.8786
GRMZM2G123922_P01	35.8194	32.7809	38.3976	39.5022	36.7565	42.5268	34.5719	32.9658	35.936	39.8993	39.3061	41.5771	31.5638	30.09	36.1221	35.2466	34.3516	38.7584	35.3099	33.1811	37.9721	34.0869	33.5679	37.71
GRMZM2G106061_P01	38.5577	38.4431	37.7089	35.01	35.2059	34.2518	38.5616	39.1129	36.3387	35.894	33.951	34.4709	37.4517	36.7148	35.945	36.1355	35.4484	33.4423	37.0467	34.8055	32.8853	37.3427	36.3183	34.9573
GRMZM5G858094_P02	34.1651	30.5245	34.2314	33.0799	30.3871	33.678	35.307	32.9539	35.8028	35.2803	33.0039	36.8515	31.4471	29.5096	32.9641	32.4054	30.7368	33.1417	33.8078	31.0772	34.2656	33.5073	32.8072	35.0649
GRMZM2G162200_P01	33.1306	34.1987	32.8155	28.6859	28.9859	29.997	35.3413	35.1859	36.1957	30.3972	28.8058	30.5888	35.7375	36.9669	36.6003	33.2837	32.7179	32.9493	35.2547	35.8363	34.6745	37.1691	35.3027	36.179
GRMZM2G340251_P03	31.3071	34.3005	31.8477	32.3378	35.5234	35.3759	33.7876	35.1458	34.1683	34.5567	35.1959	38.4014	28.543	31.6977	29.6186	29.8478	31.3235	29.9156	27.7456	31.2634	30.3236	31.8745	32.5497	33.3491
GRMZM2G154218_P02	31.3991	28.72	27.9258	33.9139	30.4649	31.9156	33.2412	29.2085	29.388	36.9038	33.7288	34.5186	27.5328	26.834	28.4933	29.5539	27.4721	27.7347	31.7015	28.0226	28.5165	32.7537	31.5491	31.5074
GRMZM2G036609_P01	31.7051	35.1179	35.5692	25.3231	28.3272	28.9105	27.9458	31.4271	31.3809	23.8402	26.8586	27.2828	34.1672	38.4974	39.4765	30.2568	34.2828	34.7085	29.0037	32.0216	32.5081	28.7581	32.4674	33.1635
GRMZM2G114945_P01	32.0482	34.5996	31.4368	29.5631	31.0762	27.4711	29.052	30.455	27.5208	27.5986	30.8305	26.2268	24.6279	27.4614	25.5193	26.4454	30.1181	26.3696	24.7301	26.0576	22.7049	23.9347	26.4016	23.7506
GRMZM2G126361_P02	30.579	31.6612	32.0859	26.6622	28.2582	28.1666	32.4505	35.0378	32.4059	28.4467	31.405	29.3009	30.0362	33.3397	33.3849	28.8006	31.5593	30.1849	31.7877	34.6798	32.9223	30.2371	34.059	32.5485
GRMZM2G001500_P02	31.4491	26.6739	29.8542	31.4024	26.6711	28.637	29.7693	26.6905	29.6236	30.3354	27.8145	28.0153	28.214	25.884	28.2109	29.5609	25.8619	26.6872	24.478	23.8927	22.8927	27.7909	24.5114	25.0789
AC203173.3_FGP004	22.6041	26.4508	25.6003	26.5634	26.7988	31.4825	27.6953	26.7937	23.8692	29.8337	30.1502	30.2293	21.6395	24.0409	25.2343	27.213	26.2897	27.9644	26.5585	27.5893	28.0864	24.8926	29.8867	28.5338
GRMZM2G046804_P04	35.6918	27.3385	28.2912	29.1559	25.6342	23.1335	31.2872	26.3625	23.5569	30.7366	29.4069	22.6363	34.0898	26.8549	26.9663	31.8484	26.9306	23.4422	33.7879	27.9707	26.2396	34.4024	27.5016	25.7342
GRMZM2G149751_P03	26.3618	23.4824	22.5959	30.5674	28.0215	27.275	33.9912	30.6714	27.2727	38.3699	35.2153	31.9296	22.757	20.9693	20.0593	26.4116	25.4483	23.068	30.9504	27.4118	24.3375	31.5906	28.78	26.4621
GRMZM2G012631_P01	21.257	22.4906	24.2242	22.1374	25.0972	26.5879	21.4006	24.5731	23.6718	22.4454	25.3814	26.8605	21.4027	24.3192	24.6296	20.7137	23.2127	22.7639	22.9741	25.3837	25.163	21.6691	25.5421	25.099
GRMZM2G015295_P01	22.2722	27.188	24.5502	25.4374	30.9761	28.051	22.562	27.8843	23.9463	25.9567	32.3411	28.3957	19.428	24.1957	22.7679	21.7305	27.3124	24.3888	20.645	25.8148	22.8437	20.9682	27.2875	24.0563
GRMZM2G448174_P01	26.7763	25.4728	26.923	20.4385	20.5494	21.1262	27.6621	25.4058	26.4614	21.8425	21.8795	22.3124	25.6394	25.3104	26.7754	23.0747	22.7508	23.7401	27.1729	24.9753	25.7261	25.3935	25.6559	25.9354
GRMZM2G047954_P01	27.216	27.3778	25.5955	21.9804	20.9011	20.1786	26.7225	25.1808	23.4313	20.3953	20.6727	18.0632	30.3703	29.1288	29.8649	26.4221	26.6355	25.9729	24.3998	25.8171	23.1361	24.4936	24.2863	23.7574
GRMZM2G087598_P02	20.7171	22.9687	24.315	18.2051	20.2828	21.2724	23.1707	27.7515	25.0817	21.1957	26.1686	23.6778	19.2791	23.5287	25.1536	19.1886	24.079	24.4516	22.9233	27.1407	26.8426	21.3204	27.0801	26.2053
GRMZM5G810061_P01	25.1398	24.1321	24.4901	23.0611	23.3067	23.5347	21.578	26.3309	27.6135	21.3544	22.8753	24.654	25.4835	24.0181	22.6927	23.9533	23.6413	22.3348	19.7865	24.1594	23.9028	20.6434	24.5362	24.7775
AC207722.2_FGP009	26.4289	26.7745	26.3895	22.3871	23.6205	21.9896	21.1437	19.4737	18.9585	21.8399	25.8047	20.3048	29.929	24.8147	25.6249	26.6159	29.0393	28.2272	27.052	27.5083	21.5108	23.6035	24.9644	21.9946
GRMZM2G357296_P01	27.3805	28.8608	25.9305	26.7165	25.3225	27.021	26.9999	25.3561	26.4081	29.8283	25.9489	30.2983	22.5296	23.8471	26.2786	21.835	21.1914	24.6587	24.3383	24.1499	26.3851	26.372	24.3233	26.0197
GRMZM2G048907_P01	18.3381	23.9257	23.3416	17.8708	22.3541	22.4256	17.0809	21.6026	21.5405	17.5922	23.4042	22.9976	19.8187	25.4191	26.4362	18.8475	25.3694	25.6649	20.4986	24.8644	25.4252	17.9532	23.0605	23.1684
GRMZM5G813217_P03	21.8035	20.8216	22.1839	23.8252	22.3495	23.4926	19.3261	20.0258	19.0362	21.8317	20.0194	22.0252	20.3652	21.0684	21.8448	22.4391	21.4664	22.1361	18.4845	18.3341	18.4732	17.9248	17.9149	18.808
GRMZM2G138258_P01	17.6316	26.6189	24.5001	15.572	22.2088	20.4176	16.3962	24.235	21.9252	16.5754	25.958	21.6141	20.12	30.4773	27.7691	18.1395	29.5189	24.6366	21.4012	30.6112	26.819	18.1641	28.372	24.3183
GRMZM2G382914_P04	31.5645	27.8168	26.7072	33.7452	29.9786	29.0143	31.0711	27.0962	25.5966	35.2347	31.1555	30.2056	32.0358	27.9893	28.0732	32.1206	29.2886	27.8688	35.6494	30.9106	29.8184	33.5787	29.7644	28.7159
GRMZM2G374302_P01	33.6403	32.9263	29.1189	29.2969	30.0797	26.5279	16.1755	16.7208	14.4722	15.1662	16.0246	14.1557	21.0203	22.0658	19.5506	21.6715	22.4617	19.524	11.4902	12.2667	10.9377	11.539	12.4544	10.7129
AC215201.3_FGP005	21.7271	18.0239	20.1967	22.6589	19.8967	21.7037	23.2084	19.9184	22.0385	24.9721	20.6078	24.2272	19.9699	16.2723	18.4007	21.2753	17.1897	18.8053	21.7466	17.9696	19.2	22.4417	18.1216	20.4279
GRMZM5G852968_P03	21.7409	22.3079	22.0465	16.812	20.525	21.2035	22.5231	25.6517	23.8823	19.5299	21.603	23.4734	21.7076	24.5737	23.2802	19.1002	21.6625	20.7468	22.0038	24.4936	23.1257	21.5824	24.1824	23.2416
GRMZM2G057576_P01	17.9169	18.3859	18.8998	19.0027	20.1848	20.4842	16.6642	17.2691	17.1771	18.8271	19.8354	19.7024	16.9126	17.507	18.5401	17.2391	18.6907	18.8241	16.9978	17.6092	17.8813	17.4396	18.5179	18.4909
GRMZM2G318635_P01	19.0692	18.2654	21.1915	19.8791	19.446	22.0906	18.9591	17.7469	20.4457	19.9759	19.5951	21.5188	16.3585	16.0152	18.9271	17.4379	17.0684	19.4658	16.5027	15.6386	17.738	16.8176	16.2244	18.6226
GRMZM2G077222_P01	17.3116	19.5617	20.1367	14.9343	17.2459	17.1001	18.1664	21.0286	20.8969	16.3007	18.532	18.8652	17.7381	20.3766	20.3658	16.9422	19.6054	19.3292	18.5721	20.8577	20.5494	18.0346	20.7921	20.7567
GRMZM2G098290_P02	19.2938	20.4497	22.6092	16.4251	17.6143	19.2699	17.7293	18.342	19.6642	15.5281	16.163	17.98	21.1825	22.8197	26.1469	19.4945	20.9843	23.0102	17.5267	18.0432	19.927	17.8199	18.5838	20.3926
GRMZM2G306732_P01	21.0631	23.1033	24.2196	15.7262	17.536	17.0233	18.4333	21.5551	20.4058	15.8496	18.5689	17.4923	21.6195	24.4382	24.8961	19.0819	22.5305	21.3958	19.1593	21.7492	21.2685	20.0672	22.5186	22.2986
GRMZM2G377341_P01	20.7886	21.7146	22.2982	21.5167	22.5577	23.4413	19.1064	19.9241	19.8476	21.956	23.0423	24.2908	16.9849	17.7902	18.5222	18.1628	19.5177	19.683	17.9619	18.2226	18.9781	18.5227	19.2309	19.9388
GRMZM2G129513_P01	16.6125	16.4255	16.484	14.8496	13.9989	14.169	20.0526	19.2993	17.3555	18.0124	17.1389	16.4824	18.2023	18.41	18.3168	17.0595	17.8825	16.9999	21.3265	19.7599	19.4367	18.8846	19.085	18.7558
GRMZM2G013342_P01	33.7932	28.8714	29.5475	30.2115	25.2473	26.3002	48.6996	41.6865	43.2865	35.6996	31.842	32.1621	36.353	31.3238	33.4062	33.1666	29.07	31.0596	45.9153	39.7003	39.6597	43.1612	35.2588	37.5782
GRMZM2G149428_P01	15.6276	20.2121	19.4013	15.4835	20.0072	19.1125	14.729	19.2632	17.476	15.1024	20.6835	19.411	17.6804	23.5426	22.3162	17.3225	23.3745	21.9177	18.6828	23.7967	21.5692	15.3719	21.1201	19.796
GRMZM6G741210_P01	22.3989	20.0201	18.2079	17.3482	15.5655	14.5612	23.0164	20.2976	17.8482	18.4554	16.4716	15.7229	24.2246	22.1078	21.4361	21.9767	19.3216	18.162	22.3337	19.9443	17.9711	22.2461	20.2716	19.0906
GRMZM2G024150_P01	21.0357	19.1908	20.6175	17.4902	16.7142	17.0098	17.1987	14.8203	14.874	13.2552	12.1586	12.1589	20.8682	20.3949	20.318	18.904	18.1776	17.9181	16.4005	14.5163	14.2868	14.8474	14.0272	12.817
GRMZM2G449496_P01	17.7577	18.347	18.2648	15.4649	16.1686	15.7624	17.5407	18.1677	17.3478	14.9013	16.091	15.481	17.5827	18.7405	19.4052	17.2624	18.0624	18.4827	16.6428	17.4675	16.7685	16.8476	17.9553	17.4876
GRMZM2G054123_P04	20.8121	19.0123	23.3218	26.8971	25.9946	31.3568	15.5309	16.1241	16.7258	16.5153	18.7749	19.6675	14.5252	15.5816	17.8801	17.6279	19.0205	21.0632	11.0613	12.898	13.5245	12.0302	13.594	14.4603
GRMZM2G069095_P01	20.2125	16.5146	15.1226	16.5786	13.0391	13.3776	18.1334	14.3686	13.4647	16.8096	13.8823	12.6656	20.1482	17.3595	15.7582	18.1294	16.259	14.4212	19.0193	15.5204	14.1554	18.9691	16.0565	14.0347
GRMZM5G836910_P01	13.8864	14.63	13.6715	12.5571	13.5614	13.4888	14.014	15.135	13.91	13.8063	14.7797	14.5725	14.9685	16.4883	15.8655	14.234	15.317	14.5321	14.9509	16.0039	15.6521	14.5829	16.0847	15.3076
GRMZM2G113033_P01	34.6346	37.1185	37.2281	29.0193	33.1703	33.5627	32.4383	34.4334	34.0204	29.7402	34.8683	33.1988	34.4055	40.2082	39.4829	32.152	38.0866	36.4065	31.7646	34.7473	35.4236	31.8455	35.3675	34.677
GRMZM2G047055_P03	15.1697	14.0981	14.2551	17.095	14.9885	16.3889	17.8862	16.259	16.448	19.6297	14.4824	18.9924	13.9031	13.6069	12.7971	14.6337	13.0927	13.3993	15.3292	12.2308	14.0102	17.3534	13.2416	14.709
GRMZM2G008247_P01	17.0074	16.8734	16.6077	16.4732	16.0642	16.5289	18.5087	18.1398	17.0942	17.0588	17.3969	16.9633	16.6424	17.2864	17.7535	16.7751	17.3935	17.4683	18.7426	18.5869	17.8038	16.7917	18.2588	17.7803
GRMZM2G109383_P01	14.0779	15.4847	17.3782	12.3292	13.949	15.4305	14.0025	14.5846	14.5466	12.5429	14.3055	14.2895	16.7457	17.6012	19.8822	13.198	16.451	16.4573	11.4562	14.8153	15.7011	12.6476	14.8088	15.3146
GRMZM2G412611_P01	15.5603	14.0712	13.5671	12.9582	11.9467	11.3452	13.7964	12.8056	12.0682	12.5269	11.961	11.1797	14.2585	13.3849	12.7274	13.8394	12.9811	12.269	13.4986	12.1564	11.7345	13.5616	12.6929	12.1089
GRMZM2G034152_P01	16.266	15.6448	14.7977	16.8458	16.8451	15.9963	18.8345	18.5853	16.7875	19.0401	18.5305	17.6231	12.8618	12.3161	12.0361	15.5631	15.0736	14.4051	16.9785	16.0736	15.2407	17.6101	16.9311	16.1134
GRMZM5G856777_P01	14.9397	12.5704	11.8245	11.1132	9.46352	8.30324	13.3668	10.218	10.4705	10.7454	9.4253	8.30802	14.8637	12.198	12.73	13.6404	11.2302	11.1248	14.2133	10.9023	10.8078	14.1175	10.9923	10.4311
GRMZM2G152908_P01	11.3846	11.1112	11.3712	21.3151	20.4378	21.4547	11.663	11.1723	11.4842	22.7647	22.1247	22.9799	10.5087	10.5659	11.0379	13.3153	13.268	13.5562	13.2915	13.007	13.3416	14.757	14.313	14.7743
AC233949.1_FGP004	11.6857	14.1578	14.69	13.0395	15.3767	15.789	12.6371	16.4429	15.9558	14.0151	15.1127	17.0406	11.2022	13.671	13.7021	12.2214	13.8038	15.0107	13.7255	15.5137	14.6016	13.4734	14.9214	15.2103
GRMZM2G102838_P01	13.2468	18.5627	17.5227	10.9433	15.8394	15.1897	12.4841	17.7803	16.0335	10.9704	16.319	15.0833	12.5357	18.352	18.2052	11.9769	17.6355	16.9731	11.8324	16.6669	16.2906	12.0105	17.8442	16.7019
GRMZM2G700683_P01	14.6095	14.6509	14.7056	14.3108	13.8548	13.8446	13.948	14.2296	14.1331	14.1563	13.7095	13.8109	14.2583	14.5942	14.5665	14.1549	13.9797	13.8226	13.7935	13.7923	14.2517	13.7688	14.1889	13.8651
GRMZM2G026024_P01	14.8104	15.3342	15.2262	14.8723	13.1362	13.2897	13.6751	15.0658	13.7753	11.8408	13.3785	12.9057	16.4319	15.7668	16.6117	16.068	15.7054	15.1139	14.5145	15.0366	15.7588	13.7868	15.5766	14.3186
GRMZM2G124434_P01	12.4156	15.97	16.4382	12.2013	15.8964	16.5479	12.7981	15.946	15.9797	13.1606	17.2852	17.1374	11.6893	15.5972	16.7804	12.134	15.922	15.9371	12.737	15.89	16.353	12.8641	16.4932	16.8263
GRMZM2G105644_P01	13.3902	13.2194	12.9975	12.5372	12.5859	12.5867	15.2986	15.6624	15.4574	15.3026	16.3434	15.6137	11.9235	12.0856	12.1162	11.5502	12.1041	12.0393	14.6677	14.3729	14.4064	14.33	14.6263	14.7828
GRMZM2G035520_P01	14.5674	13.4638	15.3466	15.2258	15.108	16.8712	14.9023	14.1876	15.7208	16.3307	15.4685	18.0788	12.681	12.1327	13.8436	14.3112	13.865	15.6991	14.5617	13.3025	15.3914	14.42	13.4719	16.0486
GRMZM2G040095_P02	23.4592	22.0575	20.4745	23.3388	21.6394	20.9416	7.14802	6.66737	6.74732	7.28931	6.66299	6.58183	20.5523	20.5471	19.9382	18.5001	17.7497	17.106	6.78205	6.41127	6.27808	6.93029	6.26461	5.93244
GRMZM2G397247_P04	15.1325	12.8177	13.1703	15.9634	14.0478	15.1034	17.3069	15.2112	16.0136	18.1672	16.2437	18.1423	14.3679	12.6394	13.0277	15.377	13.1845	13.7449	15.8219	13.9169	14.8792	15.8632	13.9388	14.9186
GRMZM2G328908_P01	13.7884	15.5341	16.0323	11.2259	12.4028	13.0625	15.304	16.8807	17.8398	13.1816	15.2988	16.0469	14.1656	15.856	17.2936	13.0709	14.9722	15.2813	15.3409	16.9024	18.2787	14.9227	17.1531	18.1649
GRMZM2G085078_P01	12.3118	10.7637	10.3372	12.6623	11.2923	10.5348	10.8321	9.37861	9.02151	11.2282	10.3897	9.39524	10.1446	8.89498	8.56936	11.0363	9.99164	9.29748	10.5689	9.44441	8.73637	11.2159	9.84469	9.10807
GRMZM5G858454_P02	15.4005	14.1651	13.0205	15.3303	13.8666	13.1066	12.6015	13.4896	12.6023	14.218	13.2334	13.1504	13.2742	13.3091	12.8483	13.1535	14.2539	13.4196	11.4134	13.0908	13.015	11.6086	12.5915	12.8373
GRMZM2G345493_P02	15.0877	15.9074	14.4403	12.6641	12.8418	11.8191	15.4181	16.0122	14.2581	12.726	13.2927	11.5623	16.1847	17.7061	17.2365	14.5504	15.4089	14.1476	16.0746	16.9362	15.0385	15.2944	15.8947	14.4977
GRMZM2G116258_P01	14.875	15.3155	15.569	15.1381	14.8979	15.372	13.784	14.8904	14.8603	14.121	14.4698	15.3751	13.6509	13.8525	14.1625	14.155	14.8318	15.1968	12.8378	12.9587	13.2724	13.438	13.7834	14.1919
GRMZM2G010884_P01	20.3535	12.7835	10.189	17.5214	11.0452	9.11008	20.8004	13.0886	10.3275	19.577	12.8387	10.3947	21.9782	14.5757	11.8385	20.0377	13.0053	10.4701	25.8808	16.6204	13.7773	19.851	13.0425	10.8928
GRMZM2G079668_P02	30.7508	31.8738	29.9531	30.6165	27.8167	26.9934	33.9189	30.7748	33.677	32.8415	27.8075	29.3228	33.2699	33.7146	32.7361	30.3224	33.1071	28.053	32.7904	29.978	30.8544	37.4898	30.9274	32.4103
GRMZM2G114793_P01	11.3512	13.5321	13.5629	13.2767	14.3879	14.7405	9.97763	11.8543	12.0016	11.824	15.9638	14.6579	11.2502	13.2862	13.6228	10.0488	12.3094	11.7192	10.2152	12.0812	12.3533	11.0563	13.5851	13.3418
GRMZM2G104310_P03	17.7028	14.0174	13.5182	14.8989	12.1904	11.9334	13.4156	10.4585	10.4161	12.1092	9.34026	9.41173	17.239	13.8622	13.0768	15.984	13.0347	12.1291	12.8314	9.87702	9.61827	12.8191	10.2195	9.89636
GRMZM2G389233_P03	14.0415	13.5793	13.2668	12.3781	12.1793	12.2807	13.4783	12.9603	12.5316	12.2571	12.2521	11.9333	13.7314	13.6726	13.3258	12.6354	12.742	12.3156	13.2502	12.7187	12.5222	13.2279	12.8958	12.8241
GRMZM2G051677_P01	13.0478	11.5617	12.1021	17.1557	15.1328	15.7246	13.4443	12.1365	12.1542	17.9487	15.92	16.4177	11.025	10.0964	10.5931	12.8255	11.5359	11.6421	12.8983	11.7353	11.6433	13.6549	12.8815	12.723
GRMZM2G085577_P01	12.1964	12.2314	13.2361	10.4539	10.8203	11.3831	11.7261	11.9053	12.3188	10.6059	11.4098	11.7708	11.9679	12.5161	13.6316	11.2618	12.037	12.5409	11.5215	11.9843	12.5856	11.2665	12.0959	12.533
GRMZM2G175562_P02	45.823	52.3578	54.1256	36.2011	37.7392	39.0767	52.3201	54.3968	55.3828	35.3352	44.1861	37.9826	53.3785	56.1962	61.6474	43.6329	52.4377	51.422	48.0635	55.7756	51.5377	45.2457	51.9107	54.8252
GRMZM2G323024_P01	12.3394	12.5691	11.9445	12.992	13.2297	12.4779	11.6508	11.7502	11.1934	14.3146	14.1603	13.6713	12.24	12.5791	11.9634	12.9423	13.2473	12.3383	11.3748	11.2667	10.8079	11.1461	11.1976	10.6033
GRMZM2G109677_P03	13.1141	10.4409	9.78284	13.5443	10.2596	9.77899	12.5889	9.78828	8.39945	13.4387	11.6766	10.0618	11.615	9.29275	8.7679	11.5807	9.68706	8.74963	12.3698	9.52681	8.90547	12.7485	10.3281	9.55388
GRMZM2G017257_P01	10.9814	9.85803	9.47303	9.97227	9.14619	8.72211	10.9075	10.1299	9.55002	10.1587	9.70197	8.79054	11.216	10.4893	10.3665	10.7221	10.2145	9.63082	11.2192	10.1591	9.8637	10.8228	10.301	9.60325
GRMZM2G162968_P01	11.4972	10.761	11.0256	12.0124	11.3288	12.1088	12.0193	10.6113	10.7283	13.045	11.825	12.7942	11.3137	10.9364	11.1655	11.4869	11.3802	11.1338	12.3313	10.4434	11.0759	11.2942	10.7139	10.9677
GRMZM5G840582_P01	11.6995	12.273	11.1175	10.0136	10.6817	10.2836	12.7731	13.4629	12.8818	11.3405	11.457	11.7909	12.1471	13.5955	12.1805	10.9429	11.2073	11.6327	10.8702	12.2622	12.2758	12.213	12.0603	11.8374
GRMZM2G018197_P01	13.9976	11.8914	12.385	15.1931	13.2199	13.9405	12.0417	10.6815	10.7939	13.1749	12.4309	12.6254	12.2749	10.9681	11.6293	13.6303	12.0029	12.0084	11.1553	10.305	10.7314	11.5321	10.5004	10.886
GRMZM2G073351_P02	10.1096	9.7362	8.71599	10.3658	10.4187	10.1597	15.2044	12.4133	13.5844	14.3596	13.0392	13.6307	9.69819	8.94846	9.37823	9.87135	8.59235	10.0802	12.711	10.7344	11.4823	12.68	11.1175	12.9685
GRMZM2G434173_P01	15.7832	16.757	16.7951	16.8864	17.8589	17.8153	16.3285	18.1171	17.3219	17.9769	19.241	19.0645	14.877	16.0921	16.2399	15.1119	16.5156	16.1613	15.6524	16.7991	16.3369	16.3837	17.6193	17.2651
GRMZM2G134264_P01	20.7231	18.2766	19.3393	19.5393	16.9606	17.2463	9.19752	8.50616	9.10374	8.76397	8.84256	8.29043	17.2448	14.9495	16.3041	17.6665	15.565	16.177	8.25916	8.16051	8.19374	8.6056	8.73905	8.34541
GRMZM2G116034_P02	11.5769	11.7172	10.1397	11.783	11.6626	10.3966	11.113	10.9185	9.00295	11.3684	12.9838	10.309	11.8185	11.5454	10.7261	11.0225	11.6174	10.8571	11.5952	11.5164	10.049	11.7223	12.0388	10.5196
GRMZM2G057823_P01	11.341	13.643	11.823	12.7953	15.9272	14.1095	10.3361	12.5705	11.8657	12.1855	14.8263	13.9131	10.6349	13.3076	12.3257	11.3853	13.877	12.5721	10.3505	12.6165	11.4814	10.9714	13.2319	11.9096
GRMZM2G411536_P01	7.88586	8.29454	8.10495	7.74478	8.19623	7.68715	7.75196	7.88364	7.40518	7.65472	8.09791	7.2773	7.91694	8.65251	8.22091	7.57263	8.2811	7.93179	8.17837	8.69872	8.14069	8.29474	8.89535	8.23203
GRMZM2G391936_P02	14.562	11.3142	11.8587	11.5492	8.68279	9.36262	14.1455	11.2286	11.4202	12.1384	9.70201	10.1296	16.5401	13.0842	13.5854	13.9496	11.3337	11.341	15.3791	11.897	12.1861	14.7362	11.7576	12.1163
GRMZM2G079381_P01	11.6158	12.3546	11.6659	10.5771	10.9561	10.2833	10.7728	11.6361	10.7426	10.0085	10.4622	10.2635	12.7031	13.7494	12.9144	12.4889	13.253	12.2126	10.921	11.7106	10.7671	10.9129	11.8781	11.1506
AC207890.3_FGP002	12.5142	11.7696	12.4902	12.9827	12.3009	13.0951	11.2255	10.6801	11.1379	11.8535	11.174	12.114	11.6977	10.6929	11.5229	11.8171	11.0152	12.0828	10.9906	10.4068	11.0342	11.9188	10.9603	11.5229
GRMZM2G084279_P01	16.0618	15.2649	15.32	16.2804	15.3586	15.2751	10.0667	9.34502	9.5543	9.98904	9.57685	9.05656	12.6911	11.9104	12.5067	14.2809	13.897	13.6196	8.08189	7.6409	7.55564	8.54816	8.00629	8.11211
GRMZM5G864335_P01	8.82515	10.2212	11.2259	9.04744	9.63451	10.6731	10.5881	11.8857	11.0268	10.2313	12.0383	11.5652	8.43337	11.3377	13.4262	8.7238	11.3022	11.8311	10.6869	13.1859	14.117	9.46391	13.3944	14.1348
GRMZM2G033885_P03	11.7041	12.0525	12.1227	10.2615	11.0272	10.8784	10.618	10.6675	10.8406	10.238	11.4267	11.2789	12.3105	12.2354	12.9627	12.158	12.6926	12.4356	11.7076	11.3257	11.9583	10.0023	10.5724	10.5229
GRMZM2G016677_P01	24.6599	27.4759	27.0259	19.5612	21.8576	21.6424	27.4818	27.5827	28.5288	19.407	22.9441	21.7074	25.2721	27.1065	29.1138	21.2932	25.0786	24.9164	24.7445	28.2176	26.5764	24.5803	26.737	27.489
GRMZM5G875238_P01	11.5115	10.3354	9.63643	8.5455	7.53264	7.01024	11.1786	10.4999	9.62583	8.66258	7.35772	7.15962	13.0851	11.9523	10.5587	10.6988	9.52225	8.59655	11.8902	10.6217	9.77521	11.4277	10.1782	9.63739
GRMZM2G006894_P01	13.5873	18.072	17.0709	13.287	16.42	15.4493	20.82	21.4269	22.0154	18.4081	19.2167	20.8759	16.0222	18.0861	19.2741	12.7829	16.8097	15.7617	23.707	24.738	28.4245	21.3855	24.2306	28.1283
GRMZM2G048371_P03	9.5742	12.0619	12.0099	10.2273	12.999	11.8597	9.94382	12.6449	12.2719	10.0193	13.4149	12.428	9.47841	12.0545	11.6244	9.3536	12.4939	11.5999	10.1886	13.0336	11.8282	10.2147	13.2973	12.3779
GRMZM2G112165_P01	25.8368	24.955	26.5072	28.9923	29.3833	32.74	24.3319	24.3073	25.5015	27.9115	27.1179	32.1296	22.2955	23.9248	23.9903	24.986	24.1948	25.9963	23.5884	23.3396	25.3187	25.0575	23.7772	26.8164
GRMZM5G833389_P02	13.4781	12.6104	12.4707	11.3921	10.5168	10.4719	9.78038	9.50947	9.55907	9.12933	8.32621	8.71076	13.2841	13.6305	13.0295	12.4058	11.9385	11.6186	9.88535	9.14608	8.73983	9.64486	9.32204	9.39978
GRMZM2G058310_P01	12.4188	10.8519	9.42624	13.61	11.7903	10.1264	14.7298	13.2876	11.2944	16.4698	14.7586	13.0618	10.0857	9.00239	7.99574	12.3216	11.3287	9.53635	14.2363	12.2453	10.6685	14.128	12.7353	10.8906
GRMZM2G399073_P02	10.6106	9.40855	9.8951	11.4437	11.8787	10.5331	7.96896	8.54531	8.25701	9.03659	9.60106	8.90089	9.98058	10.6193	10.1759	10.0718	10.4177	10.0781	8.65291	8.48249	8.77368	8.23489	9.04684	8.38618
GRMZM2G071333_P01	10.0458	9.42297	9.94079	10.3008	9.46565	10.2703	11.2676	9.53523	10.1621	11.3817	10.078	10.4985	10.4839	9.35802	10.1405	10.1908	9.44802	10.0775	11.1174	9.62987	10.3145	11.212	10.0622	10.5958
GRMZM2G131286_P01	14.2048	11.5129	12.2324	12.7771	10.318	11.4086	14.7407	12.1947	12.9332	13.425	10.7048	11.6852	15.9614	13.1049	13.9254	15.3929	12.6917	13.3721	15.1122	12.6125	13.3352	15.3858	11.8607	13.1078
GRMZM2G015967_P01	11.7781	13.3419	13.343	10.2672	11.6094	11.7656	11.7746	13.3989	13.6704	10.4931	12.304	12.1579	12.506	14.4097	14.0548	11.4492	13.5291	12.7995	11.7219	13.7313	12.7624	12.0098	13.6757	13.4464
GRMZM2G017290_P02	10.9786	9.79011	11.5192	10.0614	8.90426	9.70294	11.0674	10.1658	10.8956	12.1763	11.6066	11.8188	12.1938	11.1168	12.3676	10.5918	10.2178	11.2298	16.5528	14.3894	15.8884	12.3779	11.8092	12.5777
GRMZM2G077015_P01	10.4248	9.46215	9.95632	9.44254	8.20506	8.62588	13.2314	12.4711	12.3961	11.7326	10.8549	10.9386	10.098	9.14929	9.80427	9.31911	8.36149	9.27309	11.7731	10.3678	11.2998	11.9785	11.1282	11.7059
GRMZM2G399284_P03	9.21665	11.495	11.2367	9.13958	11.4432	11.2015	12.2629	15.2027	16.648	10.9196	13.7838	14.1061	8.58172	10.7999	11.4444	8.75238	11.1198	11.259	10.158	12.9518	12.8058	10.9691	13.2038	14.2985
GRMZM2G053019_P01	12.9622	12.6497	14.3771	12.7991	13.4442	15.2937	10.4729	10.0757	11.5843	9.52308	8.94218	11.1827	12.188	12.7685	14.2925	12.518	12.323	14.5148	8.44405	8.3754	9.65218	9.09272	8.42119	10.1026
GRMZM2G439339_P04	7.98005	6.99566	7.25912	8.2641	7.1756	7.30605	8.26975	7.10335	7.62229	8.32462	7.19853	7.30316	7.76378	6.77889	7.06345	7.84529	6.81224	7.01074	8.22779	6.86435	7.13132	8.32462	7.07139	7.30388
GRMZM2G415359_P02	10.8828	12.3016	11.744	10.5009	11.7076	11.3749	12.9823	14.1713	14.5447	11.5891	13.2248	12.564	11.0699	12.6541	12.5355	10.4598	12.4052	11.8057	11.8628	13.5847	12.5486	12.6524	13.9507	13.8825
GRMZM2G178192_P03	9.79177	10.4638	12.3464	11.8951	11.0731	12.9254	10.006	10.3154	11.8426	11.8237	13.2601	14.0567	11.6928	12.5523	14.9744	11.7275	13.1393	14.7292	14.8711	14.7945	17.1182	11.192	11.4015	14.007
GRMZM2G178958_P01	9.88807	10.7154	11.8971	9.49821	10.2394	11.462	10.3317	11.757	12.6764	9.7161	10.5362	11.8755	9.66725	10.7661	12.0608	9.11324	10.3948	11.15	10.3346	11.2367	12.2317	10.4509	11.3544	12.6465
GRMZM2G181151_P01	9.70805	11.8457	10.72	9.92454	11.9452	11.1607	10.241	12.0736	11.1835	10.4722	12.4865	11.7089	9.56209	11.1667	10.6603	9.85793	11.56	10.8926	10.285	12.0886	11.621	10.9492	12.8335	12.053
GRMZM2G351125_P01	12.2097	10.578	10.3052	11.8287	10.5538	10.4085	11.3603	10.2353	10.0711	11.6622	9.71916	9.98141	11.0225	9.47003	9.95716	11.3807	9.84951	10.379	10.5397	9.19358	9.18311	10.9961	9.40066	9.71461
GRMZM2G093050_P01	8.74207	9.15119	8.23359	9.02606	9.72874	8.90963	9.21911	10.5586	9.36402	9.74935	11.1025	10.1117	8.14319	8.86615	8.03154	8.25044	8.95306	8.29156	9.30319	10.3979	9.59847	9.5666	10.2418	9.45951
GRMZM2G026117_P01	10.8899	10.6077	10.9629	11.6376	10.45	11.6915	10.9954	10.4111	11.226	11.4465	10.9946	11.6544	10.1743	9.50617	10.53	11.2732	10.3313	11.1518	9.98876	8.95234	9.86773	10.5943	9.74674	10.9157
GRMZM2G178960_P01	10.7469	12.1751	12.9767	8.81076	10.2056	10.0501	11.5248	12.3327	13.1696	9.78209	10.2139	11.041	11.7553	12.7997	14.3455	10.3808	11.675	12.6092	11.4756	12.4145	13.9557	11.5237	12.1834	13.8521
GRMZM5G888696_P02	10.195	9.22094	9.65754	10.4563	9.61966	10.1848	10.2953	9.28972	9.4015	11.2268	10.2117	10.4323	9.84773	9.08059	9.46124	10.4218	9.77023	9.73435	10.3499	9.24882	9.47262	10.2072	9.55832	9.65564
GRMZM2G073054_P02	10.5758	8.70184	9.33181	8.77118	7.19091	7.99774	12.101	9.73917	10.6916	10.6265	8.65208	9.62012	10.6075	8.64093	9.52877	9.64556	8.10725	8.83129	11.8985	9.49721	10.5346	11.774	9.47061	10.4641
GRMZM2G416120_P01	10.2534	9.7436	11.1881	11.5463	11.1411	12.7106	9.31604	8.73749	10.5755	10.6423	10.2807	11.803	9.32614	9.12401	10.6719	10.2241	10.1835	11.449	9.0716	8.81226	9.80859	9.62008	8.97736	10.7933
GRMZM2G059191_P01	25.1444	24.8886	27.0731	18.1056	17.2605	18.5486	19.3034	19.8447	20.0267	15.5115	15.48	16.3047	29.1221	31.863	32.9883	25.1997	26.7479	27.0411	21.1843	20.7171	21.857	19.429	20.1983	21.1606
GRMZM2G077333_P01	13.1405	13.2559	12.3755	10.0167	11.3613	10.1628	9.48117	10.4974	9.32802	8.21802	10.2614	8.58921	13.6609	13.5168	13.5142	11.7523	12.6736	11.8161	10.0231	10.9266	9.89615	9.70727	10.5071	9.31806
GRMZM2G137409_P01	10.7085	10.1868	10.8488	10.4982	10.5539	11.2572	10.2454	9.79321	10.3979	10.4993	10.249	10.9172	10.0564	9.58213	10.3893	9.7409	9.56582	10.2828	9.45731	8.84285	9.32578	9.79401	9.22626	9.58106
GRMZM2G074097_P01	9.07324	8.00138	10.0486	7.69938	6.26319	8.16316	12.8033	12.3883	13.8147	10.6854	9.48697	11.4385	10.5993	9.4423	11.7887	8.99802	8.04605	9.92894	13.1042	13.0754	14.0936	13.0371	13.2964	14.7238
GRMZM2G151041_P01	8.92898	10.2661	9.67878	8.64886	10.0436	9.38275	9.12022	10.4023	10.0816	8.42619	9.58016	9.2954	9.3797	10.6513	9.84573	8.79969	9.71126	10.2116	9.13548	10.0324	9.87096	8.56087	10.3129	9.63316
GRMZM2G101271_P01	11.0735	10.9601	10.0952	10.5689	10.1942	9.24008	10.9098	10.6202	9.59032	10.4848	10.565	9.44364	10.1993	10.2129	9.54243	10.8035	10.9612	9.66816	11.1366	10.576	9.6502	10.8234	10.9104	9.76994
GRMZM2G040477_P01	8.45014	11.6394	11.9319	9.74703	10.7678	12.6993	11.077	13.5816	13.0195	11.6531	12.8195	14.8416	8.68284	8.90724	10.7595	8.04149	10.627	9.7496	8.84176	11.9221	10.7736	10.5066	10.7354	12.225
GRMZM2G075958_P01	10.6585	11.3224	12.4521	9.08346	9.55463	10.3768	10.9196	11.539	12.5352	9.56604	10.2224	11.1124	10.5002	11.0209	12.4596	9.81964	9.98121	10.9896	10.2872	10.6691	11.9869	10.1653	10.6903	12.0874
GRMZM2G122871_P01	7.58109	7.04419	6.84586	8.61215	8.65434	8.56061	10.1379	9.97946	8.53368	11.7997	13.2527	11.2014	7.60085	7.3128	7.47085	8.81558	9.06918	8.34722	11.6241	11.7918	11.1517	10.8287	11.8955	10.8886
GRMZM2G111818_P04	9.15158	9.03854	8.48408	8.94299	8.9192	8.66055	9.06533	9.48518	8.47969	8.55485	8.56569	8.55256	8.63142	9.47524	9.13028	8.54429	8.44634	8.88971	9.17182	9.30797	8.6307	8.93771	9.76184	9.17243
GRMZM2G158147_P01	10.8404	12.0111	11.796	10.2278	11.1072	11.1021	10.2508	10.9734	11.1584	9.61847	10.5675	10.5244	10.511	11.6612	11.587	10.7636	11.8308	11.3886	9.3945	9.81877	9.612	9.3934	10.0301	9.83158
GRMZM2G347056_P01	12.2786	11.5629	10.8988	13.7086	13.0552	12.3168	10.9669	10.1914	9.32689	12.4811	12.1155	10.9741	10.7131	10.4613	9.45707	11.5086	11.4632	10.3296	10.6618	9.70574	9.19132	10.6814	10.4448	9.50548
GRMZM2G087570_P01	8.34431	8.74729	10.2694	7.74217	8.29431	9.86467	10.4005	10.5752	13.3065	8.34593	9.27681	10.7587	8.07921	8.69211	10.9668	7.66054	8.34414	10.2768	8.57789	10.213	10.9753	8.84946	9.85706	11.5819
GRMZM2G064302_P01	13.1666	13.2885	14.936	12.4553	12.9983	13.7493	11.494	11.9625	13.3338	11.6483	11.0435	12.306	14.1425	14.4453	15.7641	12.9712	13.4645	14.4388	11.8251	11.6911	12.2579	12.2971	12.1062	13.2142
GRMZM2G153815_P01	10.9311	9.29014	10.8025	11.2455	9.24503	11.231	12.7921	10.7705	12.8385	13.2077	11.0329	12.6932	9.98023	8.64386	10.4619	10.4474	8.73408	10.2493	11.8644	10.0303	11.4284	12.5316	10.2531	12.2951
GRMZM2G119071_P01	9.0089	7.16361	6.95788	10.0942	7.25764	7.72113	10.3553	6.54504	7.51934	10.3262	8.16434	7.63103	8.16559	6.09236	8.02643	9.22723	6.61959	8.39726	9.88404	8.21673	8.66384	9.93862	7.94069	9.08307
GRMZM5G836250_P03	10.6851	10.5233	12.5163	8.16874	8.39878	9.2292	9.9976	9.65491	11.1961	7.6831	7.82305	8.9693	11.5417	11.4163	13.7291	9.58209	10.0309	11.0399	9.97953	9.73288	11.2022	9.36212	9.41992	11.118
GRMZM2G025171_P01	8.13815	10.6144	9.41207	8.82206	11.3385	10.9616	8.19636	10.4657	9.80068	10.2343	13.0519	12.9586	9.66279	12.0199	11.3846	10.257	12.6472	11.7693	10.9425	14.3253	12.833	9.74686	12.537	11.8801
GRMZM2G168149_P01	9.38301	7.62834	7.09927	10.6597	8.68999	8.00878	10.7546	8.29959	7.33788	11.6203	9.96614	8.73724	8.70242	7.46863	7.36244	10.0579	8.59278	7.78702	10.6635	8.61824	7.53789	10.1585	8.73629	8.12949
GRMZM2G348512_P06	23.3667	24.8685	23.0526	19.265	21.7404	19.1157	20.3323	23.1415	20.2553	17.6392	21.3324	17.8454	24.8839	27.4475	26.5492	22.6318	25.5717	23.1901	21.2571	24.6402	21.9084	20.6239	24.2578	20.0833
GRMZM2G135186_P03	9.70146	7.91709	7.62848	10.3268	8.31348	8.07698	9.06932	6.9242	6.74846	9.599	8.15017	7.82	8.91177	7.28149	8.35335	9.05482	7.38346	7.85071	9.45982	6.91423	7.77071	8.87698	7.11588	7.75131
GRMZM2G158394_P01	19.988	22.2149	21.3224	18.0945	20.7486	18.784	3.56809	4.05123	5.10088	3.48464	4.18048	4.95784	11.3255	13.845	14.1632	13.6585	16.8556	16.7742	2.88007	3.3582	4.57722	3.00061	3.74594	4.32023
GRMZM2G140614_P01	8.38328	8.05178	9.22863	8.87889	7.74323	9.3334	8.35413	7.89076	9.08341	9.0478	8.36827	9.34535	8.33955	7.65122	8.96301	8.28553	7.55524	8.8086	8.22465	7.78368	8.96852	8.48617	7.95581	9.26907
GRMZM2G163437_P01	9.30311	10.1783	10.3729	8.01451	8.31715	8.34798	9.42823	10.2192	10.0359	8.19473	9.22056	9.17752	10.3975	11.6338	11.8434	9.29097	10.3852	10.3451	10.0763	10.8082	11.356	9.2947	10.2377	10.5213
GRMZM2G140432_P01	10.6916	8.79341	9.42684	10.1957	8.10775	9.1816	10.0738	8.32904	9.00368	9.61072	7.87948	8.69881	10.6037	8.71239	9.79133	10.5125	8.68712	9.59418	10.1766	8.12082	9.01522	10.1353	8.36999	9.28835
GRMZM2G117870_P01	7.34056	7.05411	7.57872	8.61675	8.03155	8.97225	8.37016	7.67052	8.14066	9.35282	8.48004	9.19733	7.57076	7.22693	8.01528	8.29342	8.27574	8.67617	8.68679	8.07143	8.67542	8.76874	8.18968	8.74415
GRMZM2G000622_P01	8.05416	8.93933	9.35634	7.35459	8.49132	8.86115	8.21906	8.72479	8.86302	7.79182	8.44806	9.08734	8.01335	8.82755	8.99147	7.46702	8.07217	8.57447	7.96588	8.0929	8.56423	8.13411	8.40389	8.70199
GRMZM2G010054_P01	7.73782	7.43095	7.79487	8.56458	8.03512	8.98237	8.26373	8.25548	8.23558	9.65429	9.98552	9.90304	7.61562	7.28575	7.49119	7.72699	6.74506	7.80369	8.59783	7.59877	9.00321	8.83913	8.66336	8.78606
GRMZM2G020801_P01	11.7676	10.6915	10.8513	12.7319	11.4317	11.3586	11.857	11.014	10.9755	12.3171	11.2373	11.3661	10.5768	9.67788	9.45479	10.6721	9.62127	9.53826	11.6317	10.48	10.2563	12.4458	10.8464	11.1991
GRMZM2G473001_P01	10.6284	8.82022	7.81884	10.4258	9.08235	7.87353	6.75736	5.56258	4.9042	7.36093	6.41314	5.32014	10.1783	8.7009	7.68019	10.0979	8.91061	7.56774	6.81166	5.7063	4.92885	6.7396	5.80392	4.90651
GRMZM5G815553_P01	10.4031	7.91311	10.4489	8.44213	6.00154	8.77471	12.7949	9.44406	13.1529	10.2419	7.66782	10.4133	10.1262	7.47866	10.9541	9.26041	7.19723	9.94575	12.1647	9.35948	12.7705	12.5666	8.9381	12.5399
GRMZM2G361605_P02	5.11845	7.24091	6.44339	5.69419	6.96057	6.60808	6.959	7.60452	6.67445	6.83325	7.94662	6.70825	5.60622	7.29851	6.11154	5.40716	7.40121	6.14595	6.88907	7.69195	6.65048	6.49266	7.85571	6.65786
GRMZM5G892247_P01	7.83009	8.16801	8.64313	8.65572	8.88396	9.70383	7.29202	7.39192	7.71244	8.10898	8.54346	8.98235	7.11555	7.32203	8.03099	7.38655	7.71861	8.17736	6.73346	6.74261	7.18554	6.87763	7.22939	7.56436
GRMZM2G015875_P01	6.01846	6.25125	6.48348	5.99409	6.23178	6.56822	7.20087	7.56995	7.86804	6.86024	7.37717	7.49126	5.42399	5.81671	6.24229	5.60887	5.9536	6.24294	6.77404	7.3376	7.44237	7.11943	7.46194	7.6614
GRMZM2G142413_P01	5.95227	5.63883	5.73556	8.99612	8.73612	9.09926	7.84822	7.23542	8.04529	11.0175	10.8873	11.309	7.11247	6.88156	7.39966	11.7674	11.8732	11.9552	10.5075	10.4095	10.671	8.79855	8.33795	8.78502
GRMZM2G153184_P01	9.01913	9.58103	9.88714	8.93481	9.03987	9.14922	7.18105	7.75668	6.67473	8.61619	9.92816	8.97507	10.6522	11.7564	12.9284	9.83211	11.303	11.4624	11.593	12.321	12.6155	8.17153	9.31386	9.30763
GRMZM2G162529_P01	18.2518	22.9663	23.3643	16.1516	18.509	18.2901	20.3075	23.7608	21.9666	17.6619	20.3314	19.2969	22.6687	24.6136	26.4745	19.3889	22.4837	23.6655	23.3359	24.25	23.4138	21.2338	23.0852	23.5284
GRMZM2G054300_P04	8.01983	7.34318	7.97191	9.71757	9.20631	9.45557	8.99097	8.0485	8.9249	9.63451	9.75067	9.92297	7.12322	6.93472	6.98729	7.33825	7.37355	6.99124	7.58356	7.44947	7.82244	7.5921	7.89361	7.92367
GRMZM2G161335_P01	10.2426	9.96421	11.2868	9.96236	9.81949	10.7073	9.08839	8.71438	9.3657	8.65764	8.46745	9.0162	9.65512	9.27098	10.6431	9.65408	9.57661	10.2184	8.92439	8.42393	9.30598	8.81541	8.76296	9.4564
GRMZM2G122715_P02	8.07603	7.21113	7.4091	6.53524	5.9848	6.24932	11.9446	10.8098	11.4072	10.0627	9.72147	9.45843	8.13474	7.45288	7.97286	7.32229	6.82694	7.08331	10.3634	9.35116	9.48245	10.561	9.64186	9.93736
GRMZM2G099355_P01	7.62162	6.94049	7.53183	7.60296	7.03721	7.59281	7.1836	6.72758	7.05918	7.53133	7.14923	7.68201	7.22166	6.60721	7.49752	7.14331	6.71993	7.33591	7.30448	6.72967	7.57147	7.39104	7.08869	7.72927
GRMZM2G086030_P01	9.06268	8.12643	8.38864	8.03048	7.06678	7.17046	8.69087	7.6426	7.50862	7.76543	7.19	7.04923	7.69758	7.121	7.19273	7.24164	6.55421	6.64427	7.64059	7.02078	7.02778	6.87074	6.27821	6.01827
GRMZM2G157061_P01	7.3238	5.65831	6.02708	8.52717	6.89353	7.13251	8.34232	6.88116	6.79922	9.03499	7.42955	7.45453	7.2641	5.98228	6.05614	8.34303	7.00309	6.92673	8.12725	6.47001	6.80871	8.03734	6.68206	6.79507
GRMZM2G335657_P01	8.8898	8.64229	10.136	7.56438	7.96779	9.12793	9.66516	9.57709	10.946	8.00883	8.26008	9.32287	8.53952	8.60943	10.1501	7.95954	7.91764	8.89259	8.9426	9.19314	10.239	9.43017	8.83254	10.1855
GRMZM2G061876_P01	8.5159	7.93077	8.61192	8.67909	8.04825	9.29241	8.34155	7.88643	8.76324	8.63099	7.53322	9.1962	7.92499	7.3714	7.93231	7.84167	7.00964	7.87721	7.32634	6.47283	7.38915	7.73947	6.74746	7.93756
GRMZM2G155384_P02	7.85764	8.27406	8.75905	8.02292	8.61054	9.42273	7.32283	7.62021	7.9194	7.63935	8.03728	8.70302	7.24331	8.0215	8.48851	7.53411	8.38955	8.50514	7.06479	7.34605	7.92465	7.31504	7.7008	8.2775
GRMZM2G377761_P01	8.80652	9.47876	9.47693	8.35092	9.37533	9.39581	8.73445	9.53239	9.47113	8.52939	9.86852	9.40644	7.79837	8.8697	9.27028	7.87559	9.07272	8.95934	7.77006	8.74808	8.76331	8.13471	9.05452	9.25676
AC198418.3_FGP005	9.57862	7.59201	8.00697	11.0478	8.49992	9.18509	9.05339	7.14671	7.52487	11.1562	9.1724	9.35038	8.03311	6.47499	7.19833	9.01473	7.2317	7.55323	7.82754	6.14928	7.04195	8.28865	6.73299	7.13918
GRMZM2G312910_P02	7.48096	9.54278	8.85643	6.13302	7.98479	7.54952	7.29491	9.08555	8.62575	5.75063	7.60456	6.93112	7.25153	9.67015	9.71616	6.80074	9.09221	8.28505	6.63896	8.62262	7.96209	6.64925	8.39734	8.07388
GRMZM2G001918_P01	7.63294	9.31324	8.70224	7.53883	9.38949	9.1461	7.40953	8.89889	8.44922	7.62453	9.11387	8.70224	7.17157	8.72249	8.36343	7.44549	9.02475	8.42296	6.85251	8.01598	7.67793	7.3246	8.52129	8.53589
GRMZM2G358059_P01	9.21861	8.67051	10.2681	10.5483	10.0685	10.2056	7.71689	8.12948	7.51407	9.01219	8.35636	9.05075	7.86846	7.55616	7.74595	7.72247	7.82755	8.05053	7.02508	6.33097	6.71353	7.88799	7.0605	7.4515
GRMZM2G002220_P01	19.0593	21.0304	22.7815	20.9012	22.6511	22.4135	19.9743	23.7329	23.2515	22.4677	23.3235	26.0649	17.6561	19.2273	20.1966	19.1655	20.6613	21.1875	19.1537	20.6677	20.9947	19.6221	20.7058	22.1098
GRMZM2G023232_P01	12.4565	12.6831	13.4098	13.5844	13.3929	14.711	14.5272	13.9204	14.7016	15.0044	14.6871	15.7606	11.6348	11.5976	12.6133	13.0179	13.4549	14.3295	13.5703	13.5814	13.8328	14.2044	13.6826	14.6414
GRMZM2G134668_P02	9.34649	7.80141	8.99621	10.396	9.44074	9.52135	7.1992	6.3933	6.69594	8.01843	7.07096	7.73588	9.73517	8.44226	9.33712	9.28914	8.46867	8.68543	7.37397	6.61172	6.8552	7.64158	6.77093	7.17287
GRMZM2G035268_P03	8.50449	9.17589	8.55786	8.40917	9.39325	9.08972	8.09008	9.14379	8.40589	7.95332	8.69165	8.63034	7.53063	8.54032	8.09761	7.58947	8.26793	8.06267	7.46929	8.28444	7.93691	7.45355	8.50272	8.219
GRMZM2G162748_P01	10.3238	8.90004	8.18811	9.11028	8.24972	7.16098	12.5906	10.68	9.83778	9.45024	8.51835	7.40785	10.6113	9.83255	9.42	10.23	9.22746	8.35159	11.6554	10.4566	9.14092	10.0283	9.1352	8.49278
GRMZM2G043822_P03	10.628	10.2835	11.0175	12.2292	11.7194	13.0451	10.5545	9.55998	11.0064	12.5308	11.9382	13.8281	9.01161	8.37885	9.1468	9.43003	8.59069	9.74183	10.5696	9.31816	10.3068	10.0463	9.21124	10.9074
GRMZM2G091481_P01	9.01544	8.56751	7.90775	11.8542	11.1349	10.9007	8.40822	8.053	7.4671	10.7576	10.0675	9.91417	8.83595	8.54788	8.03764	9.80214	9.39943	8.50777	9.52264	8.79362	8.25756	8.8038	8.43611	8.00736
GRMZM5G851266_P01	17.0604	14.7938	15.7557	17.1363	15.1295	15.2869	4.43545	4.24799	4.55456	4.54686	4.6055	4.43579	8.58672	8.10568	8.38699	10.0932	9.68248	9.41477	4.07215	4.09499	4.13173	4.06892	4.3401	4.03354
GRMZM2G414192_P02	25.8912	27.2026	26.3681	19.7835	23.507	21.9063	26.4096	29.3466	26.2468	30.0174	29.6194	28.3371	28.7543	29.658	30.8196	26.8438	29.5643	25.5269	39.3802	37.0904	33.9421	32.9199	33.0118	30.8531
GRMZM2G444541_P03	8.31516	8.66311	8.34061	7.21642	7.23924	7.93188	7.75272	8.25207	8.32284	7.74682	6.94467	8.24499	8.38852	9.0539	7.7017	8.22493	7.59373	7.6103	7.79573	7.34389	7.76855	8.5597	7.90939	8.07912
GRMZM2G026991_P01	6.27097	6.16687	6.37388	6.21442	6.23177	6.63713	6.36712	6.06922	6.21263	6.50726	6.35352	6.54789	5.8713	5.95735	6.34584	5.99258	6.03337	6.29549	6.35015	5.96786	6.25023	6.42619	6.22002	6.33692
GRMZM2G135283_P04	11.7256	7.98445	9.50708	10.6741	7.48236	8.69189	10.1279	6.88573	8.07299	9.86239	7.02918	7.94996	12.0835	8.71638	9.95036	11.6379	8.41807	9.38311	10.4952	7.29897	8.22513	10.3934	7.18486	8.21949
GRMZM2G140150_P01	7.51591	9.34075	9.60794	7.41098	9.80152	10.1318	7.81059	9.71284	8.94179	7.39312	9.43715	9.66583	7.48614	9.88732	10.0321	7.57916	10.0454	9.42005	7.46902	9.27617	8.83077	7.33508	9.49884	9.36976
GRMZM2G172369_P03	7.02583	6.76972	7.00186	6.06035	5.88356	6.23911	7.62503	7.35124	7.34188	6.36997	6.35203	6.53389	6.84753	6.89631	7.23372	6.14951	6.14284	6.2794	7.46745	7.15288	7.43448	7.45432	7.45143	7.93567
GRMZM2G469380_P02	8.41546	8.17869	7.79887	9.6087	9.234	8.65667	9.25032	8.83866	9.39484	10.1331	10.5588	9.82453	7.10578	7.04914	6.86552	7.99597	7.97456	7.57852	7.85063	7.66313	7.6942	8.64007	8.50303	8.18685
GRMZM2G081462_P01	9.10082	9.02385	8.96994	10.3354	10.0924	10.1441	8.08216	8.21993	7.84679	9.62239	10.2083	9.47598	8.06311	8.05568	8.16206	9.11624	9.36513	8.90008	8.4205	8.47178	8.18535	7.25943	7.56292	7.31567
GRMZM2G082271_P01	7.48503	7.76737	7.21346	7.41621	7.86603	7.29999	7.82917	8.4309	7.39655	7.91353	8.96235	7.7663	7.26672	7.69338	6.93811	7.16977	7.90183	7.04896	7.92093	8.51921	7.44875	7.99864	8.85893	7.88788
GRMZM2G011101_P01	7.67336	8.75827	7.21569	7.3169	9.23235	9.32207	8.26087	8.41652	7.88266	7.59887	8.47091	9.28252	7.65132	7.74842	6.66427	7.10105	7.50164	7.30643	7.80712	7.56253	7.32659	7.59051	8.30936	7.99977
GRMZM2G348666_P01	6.62157	7.67257	7.42386	6.80678	8.11363	7.7072	6.88596	7.96479	7.24898	7.25245	9.01445	8.16469	6.56202	7.89622	7.75812	6.52471	8.4643	7.62751	7.30676	8.17052	7.95882	7.03975	8.70353	8.11083
GRMZM2G055276_P01	8.15189	8.22071	7.90425	8.34798	8.10685	7.93555	9.95349	9.34345	9.64284	8.87203	8.83402	8.27982	7.35831	7.39215	7.35184	7.35998	7.52761	7.33619	8.17275	8.41849	7.29003	8.78357	8.15672	8.25948
GRMZM2G084181_P01	6.32725	5.67167	6.40099	5.95961	5.34545	6.04477	5.64726	5.06462	5.71506	5.65355	5.072	5.76742	6.1186	5.36701	6.2704	5.74593	5.25468	6.01374	5.73085	5.01924	5.91094	5.81695	5.20532	5.87668
GRMZM2G165655_P01	7.99432	7.20954	7.33884	6.50624	6.15536	6.19878	10.1529	9.0316	9.00406	8.36047	7.77197	7.88996	8.67812	8.15809	8.40696	7.47013	7.20809	7.21349	10.5214	9.20135	9.42241	10.3164	9.264	9.52551
GRMZM2G179941_P01	7.88326	7.3954	7.54513	7.54892	6.77967	6.83107	6.95999	6.76277	6.41834	7.07117	6.14703	6.53573	7.71891	6.95821	7.43746	7.51105	7.0045	7.24755	6.9326	6.58642	6.33085	7.37409	6.36599	6.65386
GRMZM2G537291_P01	6.78464	7.59435	8.61855	7.09034	7.47525	7.9085	8.10152	8.98048	9.52278	8.54362	9.40753	9.67982	6.27737	7.10383	8.22595	6.44131	7.57398	8.05878	7.26906	8.56676	9.27372	7.49213	9.29783	9.71191
GRMZM2G009443_P01	33.6102	31.4204	34.7409	32.6398	30.387	33.5657	31.7969	30.6868	31.9943	32.173	30.0936	32.587	35.6015	35.0146	38.9211	35.8769	34.1408	36.2193	35.4773	32.8651	35.0338	32.8245	31.3917	33.9379
GRMZM2G014805_P01	7.32596	7.86767	6.81163	7.61513	8.24123	7.02695	7.01555	7.15063	6.08424	7.23811	7.95157	6.49672	6.86255	7.15934	6.59092	7.01043	7.69198	6.29014	6.94308	7.23769	6.22555	6.9892	7.69989	6.47384
GRMZM2G110567_P01	9.09849	10.0028	10.1003	11.5544	13.0657	13.4145	6.92827	6.77037	7.2786	7.2375	7.23105	7.7499	6.28155	6.60947	7.08867	7.64571	8.366	8.42636	6.62942	6.45623	6.95662	6.62471	6.49837	6.98506
GRMZM2G127393_P01	8.34109	8.61746	7.54522	8.94858	9.05805	8.01591	9.65885	9.83298	8.32174	10.8571	10.9405	9.56001	7.82802	8.40753	7.29905	8.69873	9.17295	7.7772	9.29369	9.33191	8.16882	9.37391	9.6386	8.31205
GRMZM2G159744_P01	6.22217	6.37546	5.88323	6.226	6.32984	5.8501	6.37611	5.94362	5.36226	6.52431	6.43394	5.48565	5.5157	5.85751	5.36797	5.74629	5.97832	5.39539	6.08675	5.82152	5.1349	6.30266	6.25979	5.52049
AC196475.3_FGP004	8.06205	6.93419	6.85787	9.27681	7.88542	8.05632	10.2066	8.30961	8.47484	11.471	9.21713	9.7304	7.05002	6.24582	6.54798	7.62158	6.7063	6.95257	11.2797	8.80438	9.1162	11.0322	8.89715	9.26383
GRMZM2G030628_P01	8.73032	8.29721	8.36339	7.16892	7.11801	7.45525	7.75391	7.15674	7.5013	6.85715	6.76038	6.97603	8.62754	8.64165	8.91765	8.27723	8.26919	8.39324	7.86697	7.474	7.71362	7.71794	7.28282	7.67952
GRMZM2G121612_P02	5.42924	5.54658	5.64084	4.69322	4.77106	4.85828	6.7779	6.92234	6.77577	5.90495	6.138	6.12401	5.78643	5.77587	5.97517	5.38541	5.36083	5.58107	7.17567	6.70021	7.0058	6.84717	6.7851	7.03906
GRMZM2G133919_P01	7.51506	7.52892	7.8273	7.67439	7.84829	8.11051	6.93037	7.166	7.22838	7.46541	8.0011	8.07719	7.00373	7.27373	7.82968	7.42984	7.65499	7.89315	7.59509	7.71688	8.1351	7.38612	7.81009	7.8987
GRMZM2G002178_P01	7.52828	6.61829	7.04974	8.64087	7.4502	8.04356	7.99572	7.16394	7.10919	8.37355	8.09597	7.82535	5.89374	5.12382	5.55727	6.64717	5.85963	6.39233	7.535	6.78965	7.12388	7.38566	6.89851	6.89868
GRMZM2G099352_P03	6.61548	7.98948	7.72856	8.60574	9.03743	9.33613	6.69413	7.49344	8.30137	8.96952	8.89624	9.93916	6.72855	7.36962	7.37667	7.96526	8.66521	8.375	7.34585	8.00684	7.9921	7.07547	7.54176	7.95102
GRMZM2G016622_P02	14.1228	10.8048	13.1116	11.8143	7.56434	8.76128	6.32611	5.34483	4.91347	5.87986	7.00258	4.30267	12.0514	9.36972	12.2918	10.6967	10.1855	10.7161	6.02639	7.51054	4.58965	6.08233	7.21777	4.3135
GRMZM2G143450_P01	7.36491	7.24165	6.80776	7.94323	8.02471	8.04865	7.91767	7.77565	7.68322	8.17909	8.23929	8.5715	7.17651	7.29653	7.52437	7.87021	7.22336	7.70459	7.47079	7.41402	7.91615	8.07759	7.78479	7.74377
GRMZM2G034243_P01	13.0467	14.3628	15.1618	10.3713	11.1985	12.1176	14.936	17.0601	16.9077	12.4898	14.2532	14.5657	13.3018	14.68	15.3818	12.0418	13.3739	14.0091	14.5851	15.9298	17.0063	14.2277	16.1418	16.85
GRMZM2G035017_P01	6.64826	7.10522	5.85582	7.7371	7.79138	7.19018	6.82035	7.32751	6.61021	8.47646	8.90836	7.85126	6.28487	6.72325	5.77105	7.07916	7.40666	6.53459	6.87463	7.12036	6.70108	7.07916	7.61726	6.4858
GRMZM2G046932_P01	7.05805	6.47721	6.25499	7.23187	6.59101	6.46083	6.05794	5.59522	5.50567	6.64973	6.12286	6.11441	6.97459	6.57097	6.6309	6.89941	6.75331	6.42255	6.53523	5.85257	5.7956	6.59317	6.03686	5.81506
GRMZM2G164965_P01	8.35846	6.00667	7.06759	7.81877	6.18516	7.28426	8.4587	6.37728	8.07919	8.19888	6.66423	7.37179	7.49238	6.01535	7.05898	8.03047	6.46901	7.11781	7.41941	6.03208	6.772	8.22294	6.25023	7.24839
GRMZM5G824944_P02	9.28949	7.06475	7.56146	9.03808	6.9025	7.33806	8.94757	6.99636	7.39614	8.82323	7.13897	7.20178	9.02893	7.13969	7.51231	8.60016	6.88286	6.92774	8.47674	6.84575	6.87115	8.7958	7.0291	7.19136
GRMZM2G096585_P04	7.26475	7.5185	7.87787	8.43789	8.99571	9.1091	7.29702	7.80756	7.60808	8.00908	9.01987	8.58901	6.45875	7.05571	7.47162	6.94206	7.70004	7.61119	7.30491	7.74601	7.75779	7.28554	8.1566	7.97534
GRMZM2G162688_P01	4.81253	4.83099	5.14873	6.20906	6.27073	7.15779	6.51186	5.98944	7.46958	7.11168	6.8772	8.18591	5.07393	4.82176	5.57169	6.50657	6.27489	7.46362	6.38766	6.05687	7.13989	6.3867	5.87812	6.8628
GRMZM2G010637_P02	5.74384	3.85777	4.13783	5.72365	3.8739	4.22403	5.08457	3.69801	3.87758	5.34491	3.72634	4.08245	5.34996	3.79638	3.99709	5.20127	3.68896	3.93629	5.32808	3.626	3.88466	5.22372	3.73264	3.86009
GRMZM2G058675_P02	7.18985	6.74764	8.14783	6.41749	6.15977	6.99987	7.61974	7.51073	8.44436	7.10244	7.47783	7.79247	8.20582	8.18084	9.44207	6.8918	7.02656	7.83779	8.69303	8.60995	9.3586	7.87982	8.28669	8.977
AC155377.1_FGP001	4.28894	5.44852	4.20365	4.29913	5.23643	4.26631	4.69058	5.96732	4.52248	4.68633	5.96025	4.58045	4.28087	5.54314	4.33792	4.33904	5.51922	4.41976	4.65916	6.22183	4.86774	4.75596	6.10328	4.80168
GRMZM2G064096_P01	8.08431	10.0087	9.53763	6.18315	7.20913	6.90056	7.19369	9.20983	8.3634	5.43884	7.96559	6.55741	8.26339	10.7724	11.2393	6.09681	8.51434	7.94128	7.28883	8.78096	7.62822	6.45098	8.53914	7.83223
GRMZM2G005887_P01	6.75718	6.1753	5.58187	7.69512	6.82201	6.05792	7.46494	6.23403	5.99448	7.71166	6.83303	6.15059	7.14241	6.43778	5.80252	7.4546	6.87524	5.95366	7.92805	6.74859	6.23168	7.84604	6.87402	6.22727
GRMZM2G054136_P09	5.92359	6.82268	5.98111	7.5401	8.94967	7.87805	7.09996	8.60793	7.43428	8.71076	11.7828	9.4238	5.54347	6.74044	6.06533	6.95306	8.75186	7.17566	6.97935	8.94613	7.20313	7.24972	9.39847	7.83863
GRMZM2G114182_P01	4.7131	4.93466	5.16873	4.7049	4.89042	5.25232	5.56886	6.12371	6.59546	5.31961	5.73051	6.03922	5.76435	6.33548	6.56553	5.96667	6.59695	6.62539	6.22778	7.12486	7.17389	5.73473	6.2634	6.57946
GRMZM2G145715_P01	6.77982	7.36088	6.6128	7.87885	8.86311	7.87487	6.05134	7.10427	6.40211	7.86821	8.13582	8.18274	6.54564	7.38434	6.93358	7.32268	8.31324	7.3434	8.0638	8.12702	7.94691	7.48967	7.71132	7.7036
GRMZM2G370852_P03	5.58157	7.1733	6.57422	5.34953	6.99478	6.861	6.3843	8.23391	7.77868	6.36496	7.37552	7.62348	5.01032	6.97735	6.49798	5.09705	6.58685	6.38529	5.93183	7.16353	6.98785	6.28044	7.49476	7.2915
GRMZM5G829778_P01	8.3096	6.68977	6.82525	8.91615	7.52172	7.74248	7.55588	6.22591	6.25873	8.29903	7.15637	7.122	6.94445	5.75931	6.07473	7.36725	6.37848	6.44066	7.12089	5.95703	6.09894	7.48677	6.31143	6.4372
GRMZM2G107089_P01	6.69167	7.01455	6.46558	6.29376	6.68466	6.54271	6.71317	7.2129	6.9534	6.47676	6.80863	6.94731	6.23123	6.78039	6.49264	6.34455	6.65573	6.57045	6.1088	6.39058	6.4419	6.14006	6.45256	6.58601
GRMZM2G118462_P01	6.7365	8.10861	8.55309	6.06408	6.9696	7.46555	6.56055	7.95842	7.96066	5.94746	7.244	7.40123	7.15046	8.53076	9.07105	6.56601	7.73191	8.27211	6.9636	8.00388	8.48793	7.01134	8.45282	8.78838
GRMZM2G101875_P01	7.44837	6.75677	7.4875	9.77659	9.49277	10.8252	5.99968	5.33964	5.85794	8.23591	7.59435	8.83527	5.91891	5.39111	6.11707	6.94054	6.31492	7.0871	5.8486	4.97801	5.82999	5.8314	5.13242	5.95993
GRMZM2G120652_P01	7.49847	6.04438	6.25516	6.49912	5.73376	6.09791	7.63157	5.99983	7.01433	6.28366	5.32021	5.87299	8.25663	6.75651	6.83131	7.39258	6.21714	6.20811	6.54986	5.57003	5.5862	6.88812	5.35813	6.134
GRMZM2G353444_P02	6.42537	6.60899	5.94761	6.59496	6.67961	6.13008	7.58748	7.57807	6.8106	7.34337	7.45448	6.70762	6.22044	6.25654	5.82836	6.26541	6.43832	5.8109	8.02882	8.12147	7.60976	7.53416	7.86252	7.15507
GRMZM2G700188_P04	7.58155	8.12798	7.37029	6.79871	7.12675	6.91323	8.65511	8.93562	8.71199	7.19694	7.49725	7.49343	8.13271	8.80074	8.09402	7.3688	7.5639	7.21466	7.95025	8.40248	7.86662	8.31593	8.54528	8.33577
GRMZM2G066460_P01	16.0369	11.6936	13.4772	17.5924	12.6281	13.361	3.66826	2.85079	3.66977	3.65609	2.85322	3.42913	13.3443	10.4359	10.7536	13.5482	10.9851	11.239	2.97419	2.76816	3.70122	3.17967	2.78517	3.36897
GRMZM2G135654_P01	7.68511	6.32419	6.61523	8.44391	7.18909	7.65465	6.95193	5.49136	5.63076	9.45901	8.56414	8.65369	6.82844	5.55049	6.13325	7.95616	6.69154	6.98002	8.20392	6.1468	6.82973	7.47152	6.04239	6.50268
GRMZM5G876898_P01	7.33123	5.67975	4.91777	6.45727	5.02958	4.64757	8.31453	6.33554	5.70554	7.41179	5.78474	5.22598	7.73045	6.12443	5.48908	6.97949	5.57476	4.94413	7.59666	6.16485	5.4977	8.17858	6.30634	5.57222
GRMZM2G004382_P01	7.41991	8.08158	8.84312	7.01303	8.28391	8.94019	6.59548	7.6877	8.2307	6.77616	7.84111	8.58721	6.46033	7.8494	8.11421	6.71	8.10397	8.03832	5.80661	6.86678	7.35971	6.21847	7.28553	7.88654
GRMZM2G027875_P01	6.96265	6.32006	6.64417	6.80084	6.16203	6.35645	6.57949	5.95665	5.91515	6.53326	6.0379	6.00328	7.01798	6.42179	6.7012	7.05301	6.36805	6.37071	7.00187	6.25928	6.46467	7.0509	6.47425	6.54438
GRMZM2G021846_P01	8.12899	7.44621	7.00228	6.90357	6.01833	6.00659	7.84002	6.85915	6.55591	6.99319	5.74308	5.95511	9.89383	8.98305	8.84276	8.54612	7.80749	7.51212	7.97571	6.58891	6.61726	7.71856	6.55379	6.50796
GRMZM2G062738_P01	7.27215	6.41398	7.38563	6.45647	5.63438	6.45843	6.4308	5.64012	6.30559	5.78163	5.21048	5.81288	7.2186	6.15454	7.37253	7.14892	6.18386	7.19859	6.34424	5.33988	6.21753	6.34718	5.42275	6.24882
GRMZM2G168629_P01	6.83281	5.64544	6.62837	7.53569	6.15645	7.40655	6.49083	5.54449	6.37595	7.5803	6.33737	7.36943	6.6037	5.7135	6.90239	6.99637	5.89726	7.09407	7.10856	5.79234	7.18518	6.85174	5.91314	7.03805
GRMZM5G815894_P03	6.02009	6.38873	5.65599	6.96738	7.61289	7.02308	7.21037	7.65819	6.82437	7.4381	7.9982	7.32901	5.94789	6.3613	5.89899	6.97912	7.58674	7.04814	6.85587	7.39218	6.61983	6.58119	7.00177	6.6006
GRMZM6G300210_P01	9.18074	7.09478	6.53697	9.31517	7.21883	6.61085	10.4496	7.7813	7.45355	9.23161	7.494	6.47879	10.1362	7.63801	7.49866	10.3397	8.28033	7.45943	9.98456	8.13989	7.17831	9.3624	7.35285	6.78344
GRMZM2G047310_P02	6.03266	5.87049	5.3677	6.53619	6.2202	5.70238	5.73775	5.37377	4.89152	5.91213	5.59543	5.3112	6.0143	5.56097	5.45056	6.27188	5.68673	5.40483	5.65332	5.27787	4.87591	5.84177	5.41454	4.9959
GRMZM2G100511_P01	7.02719	7.96203	6.33186	7.56753	8.38486	7.08937	7.13414	8.21325	6.56555	7.75836	8.33694	7.58366	6.64203	7.6335	6.18022	7.0922	7.59484	6.48415	7.41444	7.98985	6.9443	7.36411	7.88472	6.82089
GRMZM2G162426_P01	6.4076	5.92974	6.29073	6.45766	5.87365	6.56999	6.26007	5.74686	5.89965	6.33252	5.67558	6.11465	6.45305	5.67441	6.05843	6.4649	5.53711	6.02074	6.15865	5.66272	5.97255	6.46556	5.89994	6.07326
GRMZM2G084881_P01	6.92707	7.15529	7.51854	5.86239	6.21084	6.39622	6.15464	6.82056	6.76459	5.48855	6.14743	6.08701	7.06149	7.86013	8.34961	6.25897	7.10663	7.06407	6.8107	7.26441	7.27521	6.43619	7.43472	7.54475
GRMZM2G094123_P01	7.38201	7.16395	7.12455	7.62591	7.70193	7.45494	6.78295	7.07405	6.73181	7.07606	7.51622	7.34457	6.93842	7.18901	6.9246	7.17448	7.52211	7.1052	7.06607	7.26197	7.0751	6.95411	7.57075	7.23922
GRMZM2G328893_P01	4.33686	7.06494	8.74469	4.07538	6.46862	8.81876	8.4601	10.64	9.55784	7.71798	10.1793	9.52997	4.8961	7.15956	9.42086	4.51168	7.54464	9.77287	8.33465	10.4808	9.87243	9.66725	11.4622	10.2826
GRMZM2G163471_P01	5.02619	5.2234	5.41107	5.10196	4.88018	5.28769	4.69717	4.8662	5.46194	4.54073	4.90088	5.04687	4.43269	4.8341	5.10315	4.57691	4.83617	5.08421	4.18922	4.67052	4.66643	4.43513	4.78855	4.93864
GRMZM2G379758_P01	8.31804	7.1414	6.68516	7.59604	7.61296	6.81609	5.80324	6.07435	5.51493	5.67558	6.05546	5.97525	5.87021	6.49754	5.76657	5.69372	6.59125	5.55858	4.5113	6.0275	5.32808	5.53188	5.99953	5.35535
GRMZM2G039841_P01	9.39453	8.21629	7.44782	7.42924	6.89486	6.26978	9.71962	8.84197	8.1342	8.1973	7.38452	6.32205	9.55937	8.76695	8.57814	8.98379	7.76537	7.5251	8.77934	8.58642	7.19024	8.93682	7.54362	7.53267
GRMZM2G074282_P02	6.47909	6.6362	6.72756	6.41559	6.48627	6.67686	6.23986	6.63686	6.58812	6.8421	7.3312	7.03045	6.54066	6.7728	6.85832	6.37775	6.53158	6.48271	7.17754	7.54643	7.50813	6.9274	7.05866	7.12785
GRMZM2G174984_P01	8.57587	10.3312	10.9871	5.81155	7.30413	7.06847	8.17963	9.43733	9.24694	6.35095	7.88978	7.90303	8.64234	10.6798	11.7786	6.79662	8.7539	9.0768	9.03347	10.2313	10.4056	7.60956	9.3725	9.53338
GRMZM2G050570_P01	7.63555	7.15549	7.52441	7.15048	6.61337	7.41434	7.08881	6.72969	7.33062	6.83086	6.14808	6.9818	7.45355	7.29226	8.00346	7.45355	6.68669	7.60968	6.54432	6.21083	6.98413	6.84289	6.16359	7.15156
GRMZM2G082998_P01	8.27929	5.55256	8.1082	7.03702	5.28574	7.13538	9.10995	6.05236	8.64101	8.06562	5.61856	8.1074	8.594	5.72913	8.1842	8.23374	5.46569	7.58819	9.4553	6.23175	8.58181	9.22507	6.06421	8.65381
GRMZM2G113093_P01	6.57476	5.41172	5.06312	6.3451	5.26882	5.26724	5.62054	4.71521	4.66154	5.99834	5.00592	4.89446	6.88011	5.96205	5.54747	6.851	5.7957	5.24925	5.99964	4.85538	4.68725	5.73051	4.9852	4.62966
GRMZM2G058948_P01	7.56255	7.22895	6.4587	6.30312	6.14224	5.45965	7.11932	6.67355	5.78752	5.86811	5.86563	5.39266	7.44595	7.67925	6.71829	7.14025	7.13188	6.1959	6.88911	6.66917	5.95628	6.6716	6.60933	6.031
GRMZM2G096370_P01	6.83438	6.41022	5.83145	7.03468	6.79172	6.23947	6.93285	6.52311	5.81742	7.37053	7.3737	6.36456	6.31375	5.86847	5.64907	6.36837	6.33561	5.72916	6.49314	6.19806	5.57367	6.6523	6.49911	5.79521
GRMZM2G119175_P01	7.82729	6.16572	6.23499	7.95984	6.35602	5.9424	7.3749	5.59097	5.00205	7.54395	6.15422	5.59498	7.50506	5.8362	5.8828	7.44077	6.36688	5.64504	7.27965	5.57629	5.272	7.06853	5.9537	5.42574
GRMZM2G553314_P01	7.24098	6.71149	6.61011	7.49712	7.13463	7.04741	6.82332	6.43815	6.09493	7.45158	7.47286	6.88367	6.8283	6.64454	6.46767	7.01116	6.92962	6.68532	6.94712	6.66386	6.55886	7.20042	7.00486	6.65204
GRMZM5G862107_P01	6.16434	7.26402	7.56716	6.11825	7.43624	7.77457	5.96604	7.05604	7.44088	6.27168	7.30416	7.83887	5.57368	7.07136	7.48221	6.10067	7.41654	7.62533	5.25591	6.63278	6.88599	5.54942	6.81887	7.385
GRMZM2G005973_P01	5.6044	5.86328	6.05377	6.2829	7.11538	7.00629	5.74491	6.04016	6.25386	6.41838	7.00913	7.37511	5.49187	6.3215	6.0218	6.27226	6.9234	6.47172	5.73371	6.13374	5.9999	5.45156	5.59342	5.81756
GRMZM2G012276_P02	5.32798	5.79524	6.98113	5.63866	5.71268	6.32933	7.09578	7.56206	9.29527	5.59786	6.91926	7.10554	6.61775	7.37276	9.06786	6.64494	8.21843	9.38789	7.43784	8.22609	9.22822	6.63919	7.19348	8.60476
GRMZM2G061969_P01	6.53141	7.52882	7.64616	6.11458	7.34566	7.18962	5.77188	6.84928	6.51502	5.62557	6.63457	6.46127	7.20185	8.36305	8.60846	6.59904	7.80433	7.50382	6.12303	7.17173	7.09574	6.03264	7.30256	6.9799
GRMZM2G063851_P01	6.58907	7.74271	7.28699	7.03928	9.03594	7.73795	5.56264	7.20664	6.5773	7.07472	8.19446	7.91091	6.70195	8.43784	6.47152	6.6967	8.08948	7.1905	6.93624	8.17378	7.56071	6.3994	7.11915	7.26412
GRMZM2G074158_P01	5.56087	6.06748	6.79341	5.81719	6.35598	6.90964	5.47695	5.79894	6.41466	5.75668	6.04692	6.8562	5.11273	5.43666	6.05729	5.64079	6.12131	6.81412	5.39874	5.53948	6.02857	5.23604	5.63323	6.1261
GRMZM2G090718_P01	7.47725	7.24184	6.42806	6.98476	7.32956	6.3031	8.46152	8.11232	7.55851	6.96894	7.7897	6.40333	7.78425	7.8737	7.40167	7.78569	8.38959	7.04437	8.05818	8.52117	7.16803	7.47941	7.74212	6.69294
GRMZM2G174757_P01	7.01751	6.7975	7.00056	7.13145	6.77153	6.95673	6.90148	6.76128	6.65832	7.06505	7.12897	7.09794	6.50792	6.34916	6.72649	6.54357	6.6157	6.68614	6.90637	6.52822	6.79118	6.92664	7.04764	7.08264
GRMZM2G023418_P01	5.02778	6.70256	5.96214	5.04472	6.91777	6.00268	4.98393	6.92184	5.8918	5.4184	7.63059	6.44384	4.70741	6.36788	5.75766	4.64861	6.59734	5.84828	5.1055	6.79421	5.91445	5.06365	7.0678	6.17914
GRMZM2G043453_P01	6.19681	6.64259	6.1952	6.36799	7.09235	6.46156	7.06055	8.00687	6.84454	7.54214	8.81698	7.62646	5.47593	6.06248	5.75821	5.82372	6.74974	6.1062	6.24986	7.10463	6.4585	6.28301	7.52436	6.54933
GRMZM2G092427_P02	9.18467	5.45329	5.49535	10.2839	6.49784	5.94963	7.63099	4.83242	4.26314	8.61169	5.58839	5.58913	9.37955	6.19718	5.8076	9.7298	6.52429	5.8423	9.4047	5.56367	5.52733	7.77468	5.34291	4.52552
GRMZM2G136522_P01	5.7749	6.73071	8.07692	5.05311	6.10313	7.15713	6.28581	7.10779	8.42313	5.48596	6.52151	7.67129	5.83666	6.87355	8.04286	5.61587	6.68941	7.39718	5.9887	6.95818	8.00404	5.95899	7.01572	8.22745
GRMZM2G157462_P01	6.04089	5.87439	5.50972	6.33177	5.72207	5.39687	5.73552	5.55289	4.89753	6.13382	6.40482	5.27204	5.79647	5.91895	5.45139	5.70293	6.05742	5.31401	6.07166	6.17964	5.45629	6.18693	6.28982	5.70215
GRMZM2G172322_P01	6.67539	7.24457	7.25843	6.17444	6.54269	6.64903	7.0657	7.4754	7.59796	6.52786	7.15195	7.14091	6.81287	7.38857	7.40063	6.43531	7.10637	6.97259	7.04625	7.42692	7.37451	7.26219	7.66353	7.60594
GRMZM2G020940_P01	9.55265	8.73416	9.24352	9.89245	9.15847	9.78131	10.9352	10.1464	10.7019	10.6589	11.573	11.165	7.68376	7.00729	7.97797	8.83105	8.7917	8.83049	9.33141	9.36343	9.59322	10.1146	10.2255	10.7066
GRMZM2G040968_P01	6.14471	7.30276	6.59027	5.47311	6.45719	6.06168	6.20432	7.64172	6.69137	6.04677	7.51893	6.65899	5.94882	7.14173	6.42443	5.79492	7.17629	6.25528	6.10577	7.45202	6.53411	6.28158	7.30937	6.78387
GRMZM2G081583_P02	6.89174	8.26423	8.36126	5.23839	6.09256	6.38271	6.80058	7.7181	8.29752	5.57866	6.54794	6.87799	6.32253	7.59843	7.86942	5.30032	6.35519	6.61097	5.98226	6.64833	7.22168	5.88553	6.77522	7.37845
GRMZM2G003883_P01	6.58331	6.22552	6.85581	5.5709	5.52077	6.29259	6.76438	6.41948	7.17003	6.2056	5.93177	6.93627	7.05837	6.80304	7.48146	6.45027	6.13758	6.72957	6.77476	6.53611	7.20401	6.5924	6.42572	7.33025
GRMZM2G025854_P04	7.62678	6.34909	6.44554	6.73057	4.89578	4.92362	7.40273	6.21182	6.14562	6.6991	5.78426	5.43751	7.89279	6.42591	6.82443	7.3705	6.20426	6.02399	7.72944	6.62993	6.43917	7.5481	6.49895	6.76011
GRMZM2G144030_P01	8.44501	6.73761	7.12718	9.03675	6.48816	6.69517	9.55027	7.42591	7.89849	8.84461	7.12111	7.65265	8.36764	6.55553	7.2271	7.98761	6.56953	7.01433	9.33857	7.07042	7.4255	9.42954	7.03174	7.95959
GRMZM2G454952_P01	6.11816	7.29127	8.1222	5.94048	7.07824	7.88143	5.88386	7.06579	7.82225	5.88386	7.56872	8.02654	5.40323	6.55775	7.32044	5.48092	6.84398	7.58148	5.62668	6.59801	7.53365	5.66282	6.99625	7.712
GRMZM2G540538_P01	7.71372	7.20534	7.94337	8.19906	8.01624	8.2631	7.30195	8.33192	8.35411	8.32115	8.24739	9.23891	6.83406	7.12305	7.27147	7.23598	7.11856	7.4527	7.50822	7.5083	7.90776	7.88587	7.44921	8.56858
GRMZM2G063592_P01	8.07698	8.14978	6.99429	8.07534	7.99686	6.9221	7.7958	7.79324	6.4945	7.81958	7.95843	6.74301	7.47446	7.51602	6.66318	7.61874	7.56508	6.48895	7.40724	7.31649	6.25224	7.73186	7.7041	6.44174
GRMZM2G568636_P01	7.00534	6.36174	6.36705	5.5429	4.96298	5.13965	6.47892	5.78733	5.80862	5.49927	4.88155	4.92373	6.51129	5.73596	5.9577	6.3079	5.73283	5.80605	5.46337	4.81453	5.09403	5.19102	4.72307	4.90317
GRMZM2G071450_P01	7.2303	8.04168	6.92593	5.46352	5.797	5.2827	9.0335	9.75816	9.07056	5.70177	6.22144	5.71206	8.91547	9.48196	8.78817	6.84707	7.79045	6.72638	8.46376	10.1171	8.54323	9.3446	8.79225	8.95098
GRMZM2G076946_P02	8.50566	10.6629	11.0961	8.2073	10.099	10.7525	9.66157	12.1461	12.1039	9.03843	11.2585	11.6365	8.6591	10.4227	11.0707	7.88934	10.0249	10.0906	8.30619	10.5105	10.9149	8.73241	10.8755	11.3348
GRMZM2G096391_P01	6.0793	6.38948	7.43204	5.02171	5.29262	5.90001	6.17959	6.51898	7.09789	5.28672	5.60788	6.07435	6.55704	7.05727	8.21585	5.7371	6.2796	6.85744	6.31391	6.43919	7.33325	5.82463	6.41499	7.08917
GRMZM2G126038_P01	6.15825	5.4596	5.88193	6.29912	5.30235	6.02448	6.51012	5.8383	6.64344	6.20904	5.9357	6.51794	5.79974	4.9933	5.84964	5.77495	5.18646	5.97209	5.99864	5.41281	6.06652	6.25015	5.87149	6.04398
GRMZM5G828229_P02	6.37513	6.42964	6.97349	5.64437	5.72876	5.92378	5.40586	5.71829	5.73311	5.03604	5.31909	5.34696	6.75764	7.09714	7.80706	6.5832	6.94793	7.33142	6.03132	6.24575	6.45517	6.16644	6.5134	6.42902
GRMZM2G025855_P01	6.0993	6.39115	6.93058	6.10942	6.48705	7.64623	6.48787	7.01006	7.95701	6.18796	6.96211	7.64409	5.69645	6.30611	6.93557	5.91364	6.4423	7.12232	5.48937	6.0785	6.55921	6.01599	6.32273	7.205
GRMZM2G064695_P04	5.89531	4.48042	4.97388	6.29885	4.83803	5.38046	5.74037	4.311	4.57075	6.06008	4.82979	5.14382	5.60566	4.50606	5.06527	5.82766	4.7666	4.97141	5.8346	4.66678	4.87211	5.73747	4.6013	5.02229
GRMZM2G435373_P01	7.45331	6.71409	7.89385	7.086	6.44342	8.11126	6.93034	6.9046	7.78678	7.21328	6.35407	8.10309	7.18637	7.04913	8.26247	7.12236	6.17801	7.78187	6.91797	6.17998	7.94452	7.09036	6.1767	8.11616
GRMZM2G480002_P01	5.54953	5.58443	4.82588	5.50976	5.54598	4.94975	5.06051	5.43967	4.54606	5.16369	5.4425	4.58395	4.90521	5.17221	4.59707	4.92563	5.45494	4.67577	4.78	5.04894	4.29587	5.10565	5.31132	4.52566
GRMZM2G060659_P01	7.34767	6.23092	6.41479	7.41814	6.24024	6.54136	6.2766	5.15465	5.18908	6.45017	5.25899	5.35763	7.07249	6.06386	6.33909	7.23122	6.18993	6.16672	6.66379	5.40866	5.46449	6.53992	5.45275	5.52683
GRMZM2G090542_P01	6.98475	6.2702	6.24736	6.87684	6.25874	6.25922	6.16225	5.74843	5.44101	6.33034	5.87903	5.70001	6.32827	5.95166	5.91471	6.51435	6.15617	5.99584	6.3255	5.80131	5.69502	6.47769	5.93446	5.74682
GRMZM2G110185_P02	5.10409	5.42764	5.89411	5.71832	6.06527	6.72248	5.13311	5.31984	5.6381	5.56645	5.64647	6.11263	5.08439	5.35164	6.0394	5.43842	5.77206	6.2749	5.06469	5.25409	5.73242	4.89053	5.163	5.58596
GRMZM2G079888_P01	7.41097	5.12457	5.37161	7.11105	4.70478	5.68998	3.7942	4.9198	5.56014	3.64253	5.75597	5.59797	7.0086	4.61832	4.59319	6.76077	5.23038	4.59037	3.41873	5.04551	4.67842	3.85316	5.60068	4.91833
AC234522.1_FGP005	6.31457	5.98227	6.95336	5.3168	4.9337	5.73063	7.94939	7.33465	9.32436	6.08102	5.77835	6.81591	5.89469	5.77007	7.23255	5.56609	5.47217	6.46727	6.7376	6.51364	7.42154	7.13985	6.21515	8.05438
GRMZM2G127361_P01	4.22286	4.86945	6.22025	3.47902	4.10142	5.07743	6.12542	7.10724	9.38885	4.58864	5.77621	6.7697	4.84027	5.9205	7.5388	4.19995	5.37625	6.43991	5.81365	7.048	8.06473	5.73018	6.80093	8.50033
GRMZM2G027663_P02	5.64588	5.05997	4.95451	5.50256	5.03314	5.04195	6.8114	6.41598	6.26823	6.47608	6.24079	6.33716	5.51824	5.23365	5.3336	5.19806	4.90452	4.87221	6.51177	6.05141	6.09283	6.336	6.06053	6.09952
GRMZM2G083095_P01	4.18883	6.04812	6.78978	4.79571	6.91583	7.54978	5.27909	6.74554	6.99717	6.08914	8.26614	8.04572	3.81479	6.22503	6.92568	4.04497	6.50604	7.19297	5.43225	7.31238	7.6786	5.35522	7.98092	7.82029
GRMZM2G092719_P01	6.44327	6.18134	6.22941	7.30431	7.20962	7.4062	7.00891	6.78444	6.74166	7.64614	7.46608	7.47228	6.38522	6.00219	6.30052	6.87476	6.71389	6.88262	6.77156	6.2022	6.56861	6.56582	6.44025	6.39869
GRMZM2G154664_P02	3.98826	3.92178	4.49059	3.80789	3.66015	4.24994	4.48559	4.41632	4.94989	4.37512	4.24087	4.72316	3.89065	3.80339	4.57724	3.8095	3.6947	4.40035	4.35182	4.18963	4.87446	4.29116	4.07317	4.73438
GRMZM2G035708_P07	8.23065	6.41724	6.71799	6.60092	5.20952	5.98405	9.86601	7.44962	8.25297	7.44352	6.02272	6.40764	7.87608	6.36769	7.15905	7.24735	5.801	6.24967	8.221	6.52207	6.95774	8.51447	6.21013	7.27089
GRMZM2G077214_P01	5.85637	6.10594	5.45513	5.62672	6.08325	5.41107	5.27197	5.4675	4.75012	5.22674	5.29517	4.79582	6.06429	6.29667	5.76303	5.72011	6.02499	5.472	5.12983	5.28719	4.6843	5.10399	5.43929	4.66852
GRMZM2G088064_P03	6.81794	7.56192	7.85658	5.43498	5.7863	6.05583	4.56797	5.22041	5.70384	4.25743	4.84715	5.21905	10.5903	11.6798	11.9773	7.56816	8.20951	8.70376	5.12582	5.6394	6.02703	4.63735	5.05552	5.45665
GRMZM2G410393_P04	4.46224	3.54176	3.70986	5.23661	4.11865	4.43211	4.74869	3.77878	4.08602	5.16916	4.22328	4.54062	4.17536	3.42183	3.6695	4.86782	3.99373	4.23679	4.63744	3.8859	4.13323	4.7027	4.03608	4.19187
GRMZM2G335287_P01	4.12203	4.34178	4.56749	5.24987	5.26114	5.41244	4.04645	4.28213	4.26015	5.34487	5.60995	5.36451	3.92779	3.97697	4.38112	4.40072	4.40791	4.64679	4.4611	4.53369	4.76327	4.44717	4.58642	4.60423
GRMZM2G010406_P01	5.33366	5.29466	4.27746	5.56119	5.43276	4.47287	5.72522	5.73765	4.54836	5.96968	6.02979	4.87533	4.69182	4.65354	3.82322	4.89395	4.89416	4.0993	5.36065	5.33344	4.384	5.46383	5.62398	4.51945
GRMZM2G014788_P01	5.02591	5.5904	5.46786	5.24289	5.72868	5.62963	5.12856	5.46215	5.32898	5.44614	6.14074	5.75163	4.56809	5.01274	5.15142	4.75	5.3367	5.17048	4.86179	5.12593	5.09804	4.97663	5.60267	5.40196
GRMZM2G047219_P03	6.68896	6.51696	6.67715	6.66724	6.65125	6.60512	6.5532	5.93613	6.27967	5.62256	5.60203	5.73547	7.10711	6.92238	7.55881	6.84848	6.7836	7.19201	6.32852	5.85454	5.93287	6.18393	5.7331	6.0189
GRMZM2G428391_P01	22.3741	23.0019	21.2936	20.0875	20.6472	20.0042	16.5895	17.335	16.2248	15.2171	14.7169	15.1535	21.3057	23.3111	20.7093	19.5645	20.1547	18.0902	16.2587	16.5242	15.7548	16.6029	16.3089	15.7696
GRMZM5G883741_P02	5.47504	5.83986	6.04645	4.56588	5.02459	5.12524	6.10321	6.52092	6.54533	5.56455	6.19812	6.19719	6.15908	6.73316	7.12138	5.57485	6.16088	6.31264	6.31151	6.59186	6.70026	6.24588	6.93062	6.9515
GRMZM2G019121_P01	6.80479	5.77079	5.81442	6.66037	5.62995	6.12091	7.02478	6.05822	6.34051	7.15382	6.11891	6.40002	6.52597	5.74675	5.79597	6.45977	5.49654	5.73229	7.0328	5.89847	6.40181	7.3377	6.28037	6.39407
GRMZM2G058870_P01	4.23762	4.43484	4.08658	4.94389	5.00582	4.75652	4.2584	4.49358	4.28409	4.99691	5.04987	5.12476	3.79986	3.9701	3.84137	4.17653	4.24566	4.24141	4.32542	4.3342	4.30543	4.26137	4.46593	4.35983
GRMZM2G096972_P01	5.49427	5.05672	5.11347	5.26122	4.94265	5.261	5.35583	5.10968	5.16455	5.3537	5.16773	5.38819	5.12172	4.74303	4.93257	5.12065	4.89223	4.86324	5.05918	4.90344	5.01338	5.23343	5.18453	5.2636
GRMZM2G441347_P01	6.15257	6.96772	6.98801	9.21314	9.91096	11.4081	4.70857	5.30669	5.34548	7.31307	7.89293	8.4429	4.33447	4.99534	5.14648	5.37418	5.96824	6.43292	5.00624	5.42047	5.73781	4.89777	5.53766	5.49829
GRMZM5G877454_P01	5.74962	4.81901	5.56697	6.49878	5.36133	6.37041	5.13543	4.36749	4.95277	5.91489	5.1614	5.85363	5.31385	4.29118	5.11514	5.58435	4.62681	5.39621	4.90725	4.02172	4.79097	4.89581	4.35107	4.95389
GRMZM2G010328_P01	6.28722	5.95417	6.31227	6.11414	5.61924	5.96746	7.14246	6.70524	6.70401	6.9193	6.38045	6.58636	5.8447	5.69088	5.88486	5.87767	5.69865	5.94431	6.8819	6.38105	6.68461	6.93261	6.57031	6.91615
GRMZM2G137868_P03	6.62599	7.38558	6.22869	6.44061	6.69278	5.82027	6.26732	6.86815	5.7547	6.02149	6.38318	5.48554	7.30505	7.85034	6.98495	6.64883	7.2095	6.20558	7.54819	7.73704	6.81759	7.14251	7.87343	6.70268
GRMZM2G002416_P01	6.29141	6.21237	6.88456	6.62296	6.99108	7.50747	5.96111	6.15861	6.48564	6.47386	6.54116	7.29384	5.71449	5.46889	6.30381	6.02591	6.22721	6.61009	5.76608	5.43861	6.18213	6.14419	5.96207	6.73246
GRMZM2G123234_P01	6.08916	4.06119	5.11412	6.20577	4.15515	4.99383	6.96036	4.53881	6.03127	7.53108	4.73084	6.15816	5.80966	4.02451	4.82329	6.13358	4.4226	5.14	6.36927	4.54746	5.23288	6.90113	4.51944	5.50646
GRMZM2G168143_P01	21.6225	19.8671	21.9904	17.8402	16.5	16.6793	23.0255	22.8945	22.7663	20.2406	19.6721	19.9629	22.4339	23.1671	23.9902	20.2892	20.104	20.668	24.9928	23.492	23.3514	24.5554	23.3033	23.5915
GRMZM5G848768_P02	6.82269	6.88845	7.34157	6.58489	6.6637	6.96534	7.43959	7.09059	7.65901	6.64196	6.57325	6.96534	6.39329	6.44854	7.26	6.28866	6.43689	6.93668	7.27518	7.25915	7.86917	7.55374	7.63944	8.0029
GRMZM2G006791_P01	4.25841	4.33989	4.27388	3.87318	4.08058	4.04344	6.94758	6.8225	7.04732	5.94878	5.72956	5.89988	5.03888	4.94779	5.19045	4.87416	4.72461	4.90003	7.51714	7.05886	7.33127	6.54187	6.29622	6.31372
GRMZM2G019919_P01	4.9786	4.80729	4.15217	5.05002	4.64639	4.53476	5.52101	5.10151	4.78469	5.49354	5.05968	4.86507	4.54906	4.19908	4.10254	4.72687	4.22942	4.17677	5.20985	4.91073	4.68366	5.47106	5.04589	4.70035
GRMZM2G057243_P01	5.95159	7.04383	7.81209	5.28007	6.16854	6.65597	5.22165	6.25163	6.76597	4.60619	5.64423	6.11522	6.05249	7.34896	7.83286	5.57393	6.99441	7.21442	5.332	6.32899	6.94981	4.98208	6.2194	6.65366
GRMZM2G157269_P01	7.38012	6.83285	6.71961	5.86224	5.37779	5.47366	5.46188	5.25625	5.04343	4.79777	4.59802	4.42757	7.52834	6.93936	7.31041	6.81119	6.2388	6.44318	5.70748	5.33613	5.30496	5.45098	5.4208	5.27718
GRMZM5G821637_P05	5.71963	5.41764	6.60499	6.06302	6.16681	7.74929	7.0663	6.81155	9.38654	6.38391	5.68111	8.529	6.03285	6.04686	7.55265	6.88747	6.63109	8.47233	6.18424	6.34674	7.68374	5.66258	4.89821	7.02147
GRMZM2G022258_P01	5.33199	3.98633	4.94254	6.10109	4.35575	5.28018	5.43386	4.14179	4.62185	6.13362	4.57381	5.53062	5.22318	4.12543	4.85292	5.42799	4.10047	4.80448	5.97948	4.27393	5.07963	5.36879	4.44248	4.8878
GRMZM2G041697_P03	2.44131	2.85532	3.13046	2.31876	2.79837	3.08713	2.42895	2.68761	3.01013	2.43884	2.84877	3.12734	2.3111	2.62952	2.87141	2.20437	2.6691	2.82808	2.40153	2.68305	2.92534	2.45514	2.82827	3.02011
GRMZM2G087041_P01	6.83123	6.10067	6.86241	7.12769	6.39804	7.25801	6.09814	5.41141	6.05954	6.75544	6.64407	6.92685	7.37384	6.89072	7.81954	7.5717	7.26071	7.82159	7.27592	6.68538	7.21276	6.96605	6.60901	7.0393
GRMZM2G087326_P01	6.30444	5.52679	5.75739	7.56886	7.14506	7.3004	5.42855	4.98908	4.92061	6.86498	6.51021	6.55679	5.9708	5.6045	5.56818	6.2654	6.02736	5.76142	5.82258	5.6605	5.64179	5.77439	5.5365	5.49342
GRMZM2G148709_P04	5.36278	5.60572	5.65922	5.30635	5.65034	5.72301	5.69162	5.69771	5.66206	5.99711	5.86736	6.16903	5.0448	5.46416	5.49175	5.16201	5.62225	5.68941	5.66286	5.47628	5.7139	5.77247	5.61619	5.89162
GRMZM5G862540_P01	6.64013	5.71592	5.19896	7.51238	6.7819	6.13244	5.6891	4.39204	3.98332	6.22149	5.13032	5.10423	5.60482	4.54198	4.28186	5.97619	4.759	4.30746	5.1156	4.30207	3.86504	5.2403	4.37677	4.1267
GRMZM5G864319_P01	6.86089	5.61236	5.80698	7.46579	6.1773	6.36498	6.45112	5.03605	5.11107	6.86716	5.75061	5.74181	6.43649	5.0406	5.57889	6.64068	5.51735	5.47357	6.67343	5.32221	5.5591	6.60444	5.54352	5.3636
AC233895.1_FGP001	7.0593	6.0246	5.36105	7.81352	6.78796	5.73734	7.44276	6.5201	5.43787	7.97987	7.34099	5.87949	6.5814	5.84768	5.11333	7.09314	6.35865	5.35896	7.22988	6.34875	5.38404	7.80013	6.77126	5.72793
GRMZM2G036921_P01	7.89384	6.36109	6.88264	7.15778	5.88039	6.85066	6.81716	5.52839	4.78067	6.15392	5.13778	4.15942	7.67616	6.38233	7.57033	7.57358	6.16482	6.78296	6.21422	5.2993	4.49105	6.51334	5.24589	4.48227
GRMZM2G079348_P02	7.6287	7.28859	6.34218	6.45522	6.49524	5.83749	4.39784	4.60786	3.89906	3.97394	4.69109	3.76522	8.93577	8.64582	7.90585	6.43139	6.47649	5.80354	5.08243	5.26173	4.62246	5.09471	5.53318	4.82421
GRMZM2G007038_P01	7.83843	7.42911	7.43715	7.42411	6.91266	7.20874	6.9324	6.39254	6.64148	6.88315	6.43289	6.65358	7.66332	7.06965	7.58237	7.27636	6.86204	7.15882	6.54232	5.7125	6.07271	6.43991	6.1886	6.24515
GRMZM2G039396_P01	7.70398	6.58385	5.89388	7.32	6.51589	6.03209	7.3718	6.4244	5.82386	7.18743	6.32115	5.93069	7.34133	6.07609	5.81239	7.23771	6.35644	5.79489	6.7486	5.69054	5.18528	7.08915	6.03165	5.5269
GRMZM2G047093_P01	4.28461	5.08965	5.14518	5.74283	6.38317	6.41864	4.41228	5.07751	5.14267	5.79005	6.60668	6.57726	4.29554	5.17359	5.18043	5.29028	6.04791	5.97452	5.22338	5.84311	5.89294	4.96103	5.77838	5.66836
GRMZM2G009871_P02	5.00942	5.43872	4.8901	5.46098	5.86848	5.28929	6.48985	6.52571	6.00852	7.05596	7.26129	6.5783	4.98804	5.3003	5.04397	5.03691	5.46233	5.04496	6.55807	6.52732	6.04883	6.40076	6.61585	6.09603
GRMZM2G021617_P01	4.29924	4.86579	5.26021	5.20324	5.7804	6.37467	4.89905	5.27739	5.83662	4.60171	6.09859	5.81875	5.72219	6.36783	7.55061	5.88348	7.0227	7.24691	6.03023	7.14308	7.21853	4.36085	5.44423	5.6937
GRMZM2G032049_P01	5.30599	4.78791	5.06264	5.78269	5.26177	5.42315	5.36458	4.9497	5.22175	6.09587	5.80217	5.96793	5.50626	4.67064	4.81845	5.88016	5.15408	5.41509	6.14913	5.26847	5.53794	5.91531	5.10526	5.55305
GRMZM2G146589_P04	4.64309	3.96844	4.64631	5.36491	4.58359	5.28207	4.59253	3.90109	4.3257	5.4048	4.9383	5.25797	4.5299	4.046	4.50079	5.03276	4.54562	5.12427	5.38857	4.51134	5.02376	5.04343	4.50562	4.83913
GRMZM2G010349_P02	5.40156	7.27559	7.08934	3.7163	4.9492	5.0956	4.44571	5.73263	5.74654	3.58577	4.72236	4.71881	5.78784	8.11265	8.15224	4.72277	6.71175	6.70824	4.9945	6.52911	6.61638	4.34554	5.96672	5.87285
GRMZM2G058910_P01	6.08043	5.42466	5.98219	6.28313	5.79624	6.21867	6.22323	5.61241	5.76597	6.39749	6.00921	6.27168	5.95276	5.40168	5.98517	5.96244	5.75084	6.02984	6.74904	5.97278	6.29849	6.3515	6.03219	6.448
GRMZM2G076006_P03	5.86327	6.49241	6.2153	4.93279	5.70798	5.31938	5.71184	6.52294	5.99579	4.84355	5.45978	5.42112	5.84657	6.78507	6.18077	5.28345	6.04379	5.38351	5.57537	6.20771	5.87987	4.94316	5.78032	5.60425
GRMZM2G136106_P01	7.64876	5.83594	5.74801	6.67906	5.35967	5.24166	8.74517	6.71866	6.41731	7.49298	6.14891	5.76028	6.37049	5.14727	5.18442	6.4085	5.17271	5.21187	7.35062	5.71879	5.71355	7.30441	5.89806	5.7229
GRMZM2G141473_P01	4.63568	3.80002	3.60139	4.18731	3.22803	3.06978	5.93486	4.70512	4.42736	5.52531	4.52091	4.01136	4.35539	3.54289	3.46273	4.03059	3.20752	3.01943	6.24971	5.04657	4.70043	6.08116	4.94896	4.70752
GRMZM2G319109_P01	5.91441	6.96198	6.89926	5.62527	6.60885	6.60346	5.03076	6.06771	6.09024	4.98199	6.01221	6.13471	5.4331	6.39864	6.60558	5.35937	6.47773	6.74465	4.77994	5.6126	5.84245	4.87516	5.86027	6.07965
GRMZM2G022269_P01	6.55488	8.04944	6.57563	6.64626	8.19104	6.83571	6.9343	8.07745	7.33222	6.8416	7.78414	7.18428	5.88409	7.57563	6.41012	6.20988	7.21929	6.4081	6.19598	7.46981	6.31014	6.733	7.6332	6.94379
GRMZM2G150772_P02	5.12225	4.18914	4.72966	5.2486	4.14368	4.79004	5.06877	3.76777	4.43584	5.19932	4.08594	4.57704	5.06615	4.00282	4.70874	5.12434	4.00445	4.78433	5.04098	3.80216	4.47577	5.12959	4.00404	4.49859
GRMZM2G069542_P01	21.7119	19.1447	15.3834	24.4058	21.5786	17.5988	16.0022	14.515	11.114	18.0993	16.2617	12.6534	20.4369	17.8491	14.7757	22.2378	19.4135	15.3819	17.3846	15.4498	12.5495	17.7216	15.7876	12.5433
GRMZM2G078756_P01	6.49466	5.24081	5.55252	6.39541	5.37893	5.27701	7.66027	6.19664	5.9609	7.90841	6.91914	6.1415	6.53557	5.2133	5.61652	6.6858	5.5176	5.46683	7.64619	6.18013	6.02761	7.67368	6.35346	5.95711
GRMZM2G079538_P02	4.32648	5.5153	6.07535	4.3804	5.35773	6.4982	4.85675	5.9084	7.21885	4.49895	5.43624	6.56754	4.07782	5.47523	6.19236	4.18096	5.37831	5.96267	4.2182	5.36152	5.99858	4.46044	5.56728	6.48644
GRMZM2G132903_P01	4.94291	6.16288	6.31869	5.45092	6.74192	7.22728	4.83563	6.16595	6.16195	5.42152	6.80953	7.13616	4.26295	5.31276	5.70575	4.47605	5.73997	5.97335	4.70875	5.84017	5.98546	4.90127	6.22681	6.49136
GRMZM5G872068_P01	7.73324	7.17284	8.94607	6.93088	7.18666	8.87152	8.50093	8.96164	9.37092	7.00238	7.9387	8.83559	7.61913	8.09142	10.7883	6.85722	7.28028	8.87871	8.58543	8.44442	10.6562	7.77079	8.92404	10.6527
GRMZM2G073814_P02	6.79539	7.08246	8.97445	7.55884	7.82283	10.2733	5.31707	5.46718	6.75606	6.52749	6.65769	8.87179	5.43853	5.50099	6.88193	6.03611	6.25615	7.85499	4.49949	4.47814	5.55446	4.82708	4.73456	5.83299
GRMZM2G095124_P01	7.43371	5.84774	5.58457	7.84223	6.38224	6.28404	7.28961	5.71396	5.36539	8.15197	6.47948	6.25273	6.95833	5.68921	5.47889	7.23167	6.01628	5.58065	7.4545	5.85363	5.67515	7.63797	6.01746	5.77859
GRMZM2G109165_P01	6.27217	6.51058	6.70635	5.61606	6.0219	6.32973	6.09623	6.54356	7.10909	5.803	6.65106	6.61907	5.51831	6.05355	6.44588	5.77795	6.15314	6.27406	5.07419	6.00541	5.9861	5.84209	6.06081	6.52972
GRMZM2G389768_P01	6.59601	6.55383	6.20781	6.29904	6.34523	6.37692	7.19059	6.71301	7.63501	6.25325	6.31828	6.43201	6.01843	5.61867	6.01692	5.79669	5.87797	5.82154	6.11197	6.23612	5.92532	6.73402	6.33689	6.58447
GRMZM2G181258_P01	7.81562	5.49699	6.16679	6.27045	4.60928	5.09593	7.28226	5.33415	6.12193	6.45664	5.0831	5.34927	7.83268	6.033	7.14668	6.90023	5.60046	5.87238	7.52631	5.58802	6.24008	6.91581	5.25499	6.00695
GRMZM2G015132_P01	6.94828	6.77432	6.70834	6.67907	6.54943	6.01893	6.84264	6.9823	6.78465	6.03093	6.74612	5.98509	6.34717	6.61711	6.52255	6.21154	6.8554	6.41241	6.40305	6.75317	6.23325	6.53731	6.72215	6.33477
GRMZM2G176998_P01	11.3449	9.36965	8.6029	13.3426	11.5352	10.1485	4.03557	3.62079	3.2039	4.29713	4.08054	3.36691	7.11102	6.20171	5.67809	8.66946	7.4971	6.57166	3.44599	3.25378	2.70548	3.75331	3.44123	2.72255
GRMZM2G326643_P01	2.91703	3.43263	2.71405	2.98871	3.58528	2.77629	2.80495	3.28206	2.48289	2.83624	3.81892	2.85032	2.76342	3.42536	2.81331	2.87777	3.45582	2.80892	2.89342	3.42952	2.78643	2.91845	3.5704	2.76779
AC155496.2_FGP009	3.13043	3.70744	3.79259	3.75915	3.88719	4.23965	2.97607	3.25413	3.77422	3.98127	3.5876	3.9661	2.97576	3.71636	4.16071	3.15239	3.52448	4.48702	3.02031	3.23665	3.8895	3.00462	3.08615	3.6902
GRMZM2G106928_P01	7.86145	6.87765	6.31609	6.83736	5.81156	5.28887	7.88093	6.87765	6.5927	5.85303	5.24913	4.44521	9.0266	7.94374	7.56334	7.51931	7.13324	6.01119	8.59015	7.95331	7.05413	8.43116	7.15374	6.72848
GRMZM2G155253_P02	23.8585	22.7171	23.5995	23.0567	21.9628	21.0617	22.3544	21.654	21.0663	22.1125	23.8675	21.8321	24.0791	23.1815	23.854	22.9736	23.3654	23.0258	24.0293	23.4667	22.9263	23.5359	23.785	23.6342
GRMZM2G161337_P01	4.30986	4.95223	4.62713	4.7004	5.72386	5.6593	4.37579	5.15872	4.95802	4.81705	5.59273	5.49695	3.82676	4.45168	4.51049	4.11121	4.6836	4.73854	3.80816	4.50207	4.45241	4.05077	4.93511	4.55715
AC211737.3_FGP012	5.01411	5.68486	5.22992	4.34167	4.89674	4.60023	5.55633	6.40026	6.05785	5.13791	5.9222	5.53681	5.57019	6.56375	6.15643	4.98737	5.93686	5.53098	5.69052	6.22381	5.76791	5.70191	6.37151	6.11986
GRMZM2G060470_P01	5.80861	6.65795	6.61099	5.67316	6.61901	6.46587	5.4511	6.14224	5.88536	5.647	6.78823	6.32009	5.23484	6.06905	6.02272	5.37494	6.52365	6.01688	5.38192	6.04151	5.7357	5.42842	6.15836	5.94238
GRMZM2G072729_P01	4.63647	4.25145	5.68745	4.71242	4.32425	5.72061	4.65212	4.03945	5.90642	4.84592	4.82276	6.02648	3.82674	3.66215	5.05284	3.98003	3.85401	5.086	3.95564	3.89384	5.10316	4.39065	4.15209	5.41703
GRMZM2G073774_P01	5.24822	4.55177	4.88327	5.86992	5.32504	5.74592	6.32903	5.5609	6.14258	7.08413	6.61629	6.92876	4.74325	4.10593	4.5172	5.15546	4.99991	5.44053	6.09609	5.14513	5.9519	6.4739	5.69502	6.38985
GRMZM2G084525_P01	4.10542	5.2851	4.04507	4.41587	5.57807	4.41147	3.80758	5.0429	3.78056	4.16401	5.47389	4.11639	4.24579	5.45803	4.3002	4.28851	5.61615	4.37601	3.97033	5.16876	4.04303	4.00248	5.37712	3.92728
GRMZM2G410515_P01	5.28829	7.17612	5.25066	5.60666	7.28887	5.68525	5.16584	6.8939	5.04959	5.47249	7.32669	5.49428	5.25049	7.18663	5.49535	5.51242	7.20414	5.41237	5.29308	7.01715	5.34694	5.41074	6.9065	5.26556
GRMZM2G412470_P02	4.20605	4.98704	4.5095	4.75788	5.7416	5.01608	4.83109	5.40112	4.92911	5.17853	6.11964	5.30076	4.39606	5.30549	4.80628	4.76169	5.71106	5.18823	4.94535	5.76313	5.01563	4.92335	5.97093	5.23441
GRMZM5G838396_P01	4.39263	6.12235	5.34363	4.42714	6.62379	5.68671	4.21624	6.19596	4.9191	4.62909	6.98744	5.82265	4.17023	6.21861	5.60256	4.51405	7.1743	5.77194	4.47486	6.33249	5.53189	4.17577	6.34507	5.32151
GRMZM5G856084_P01	5.32056	4.69501	4.78822	4.93177	4.55567	4.48565	5.39008	5.04724	4.77026	5.03682	4.97417	4.65632	4.55482	4.45239	4.59108	4.80869	4.79342	4.66814	4.67068	4.50696	4.38164	5.28658	4.97514	4.65868
GRMZM2G081886_P01	7.08515	6.59327	6.68426	6.37275	6.355	6.27637	6.56724	6.00987	5.91546	6.658	6.23553	5.97485	5.88004	5.30568	5.46188	6.00394	5.92492	5.75165	6.13936	5.42581	5.16298	6.29351	6.14991	5.77254
GRMZM2G088114_P01	4.70816	5.54921	5.50556	4.72009	5.58521	5.58168	4.97209	5.65445	5.45859	5.04415	5.73422	5.56818	4.48671	5.22959	5.1703	4.55687	5.43289	5.18434	4.18604	4.82357	4.63529	4.32588	4.99085	4.89605
GRMZM2G111216_P01	6.61332	6.42986	6.4291	5.24089	5.42585	5.34109	6.10934	6.04635	6.10428	4.86824	5.07674	5.12666	6.98597	6.88281	6.94043	6.30666	6.32092	6.22799	5.77755	5.98328	5.75599	6.09803	5.8342	6.07446
GRMZM2G463640_P01	7.17746	7.1524	6.96075	5.64924	5.84958	5.33129	6.81336	6.64656	6.42776	5.95005	6.54976	5.88715	7.02528	6.8125	6.88936	6.16979	6.54976	6.00705	7.3332	7.16113	6.82698	6.88163	7.27831	6.66965
GRMZM2G058261_P01	5.23056	4.58082	4.8454	4.58242	3.89409	4.1936	5.46924	4.6155	4.8052	4.72396	4.1592	4.22459	5.33972	4.74144	5.16306	4.95689	4.41564	4.7408	5.35382	4.71087	4.98002	5.34338	4.88244	5.04733
GRMZM2G074604_P01	10.5584	10.4945	11.1035	17.3796	17.7019	18.8579	8.39287	8.52304	9.25851	13.8472	14.1832	14.7394	7.27785	7.62851	8.38778	9.3154	9.61357	10.1225	8.32222	8.56474	9.37551	7.90652	8.29055	9.15501
GRMZM2G104325_P01	16.2828	15.742	16.5376	14.2937	13.9066	14.6698	14.4807	13.5067	14.2694	13.2591	12.4355	13.3634	15.4498	15.1576	16.2406	15.8777	14.9561	15.9303	14.3626	13.13	13.8131	13.9937	13.1656	14.1758
GRMZM5G854138_P02	4.1311	5.87047	6.62179	4.18705	6.98204	7.82442	5.17154	7.65444	8.34591	5.52564	10.0568	9.70685	3.19643	5.4158	5.82092	3.85825	6.76742	6.48875	4.79561	7.70097	8.17895	5.13437	8.55201	9.01241
GRMZM2G006363_P02	4.89944	5.80911	5.20237	5.57298	6.36808	5.8962	3.09858	3.71974	3.63714	3.46787	4.37062	4.08002	5.26825	6.44333	5.88876	5.90002	6.88855	6.32473	3.45837	4.33615	4.09863	3.33449	4.06442	3.87214
GRMZM2G032351_P01	3.9344	4.21152	4.33792	3.41389	3.60677	4.07668	4.37629	4.44883	4.94262	3.73456	3.64948	4.3909	3.83564	4.06608	4.50097	3.4898	3.66317	4.12509	4.03509	4.28928	4.86315	4.18032	4.06487	4.76267
GRMZM2G069765_P01	4.12543	4.26891	4.33866	4.58175	4.61697	4.44534	5.01651	4.83822	4.98757	5.25439	5.25754	5.13121	4.19472	4.62396	4.28322	4.06332	4.29296	3.97536	5.08918	5.40315	5.33197	4.6747	4.69829	4.50666
GRMZM2G092627_P01	5.01087	3.96924	4.18406	5.23817	4.1379	4.56389	4.7984	3.84464	3.88568	5.21395	4.23434	4.57106	4.82755	3.84781	4.14692	5.10228	4.13632	4.32966	4.9748	3.79979	4.02031	4.83398	4.02996	4.29843
GRMZM2G118286_P01	6.97547	5.77127	5.99494	6.33415	5.34262	5.52313	6.43122	5.16326	5.42431	6.15805	5.04807	5.33815	7.11552	6.20393	6.2655	6.71894	5.73173	5.98952	6.62327	5.31053	5.68402	6.64337	5.42858	5.78043
GRMZM2G328094_P01	5.90571	6.77614	6.77723	5.755	6.46059	6.80271	4.85724	5.41678	5.60223	4.92014	5.38416	5.57744	6.35904	6.95787	7.42671	5.87901	6.67495	6.78687	5.22335	5.60917	6.06024	5.10052	5.72034	5.96658
GRMZM2G331368_P01	6.78051	6.79198	6.47318	6.52941	6.61382	6.48766	6.45555	6.2387	6.01904	6.3112	6.42491	6.24611	6.63281	6.7066	6.67656	6.48912	6.56408	6.61798	6.88794	6.73887	6.4666	6.91345	6.92105	7.01289
GRMZM2G146115_P01	5.89849	5.51222	5.245	6.0972	5.77363	5.75914	6.00416	5.78634	5.60414	6.54916	6.40918	6.34617	5.52751	5.40887	5.2072	5.84968	5.5288	5.38704	6.10581	5.7156	5.65599	5.96798	5.86537	5.79532
GRMZM2G156861_P02	6.80045	5.4814	6.11754	13.493	10.2987	12.1936	6.42793	5.04313	5.71818	8.55858	6.60755	7.65589	5.31239	4.43774	5.37038	6.88052	5.67547	6.57666	6.81199	5.30081	6.2471	7.71514	6.15526	7.12068
GRMZM5G817886_P02	5.63841	4.34158	5.08543	5.04752	3.39019	3.92746	5.82321	4.32632	4.82221	5.19408	3.57977	4.33642	6.44539	4.94387	5.66689	5.40495	4.2287	4.73596	6.54503	4.78131	5.42399	5.90142	4.40825	5.00165
GRMZM5G828182_P02	4.99566	6.38206	5.23959	4.94734	6.36824	5.38266	5.09884	6.42163	5.56609	5.42753	6.74949	5.61718	4.79281	6.05796	5.20355	4.90355	6.1685	5.45958	4.89449	5.70372	5.33533	4.93979	6.14841	5.19602
GRMZM2G019695_P01	5.89807	5.70802	6.22758	4.99467	5.05192	5.6096	6.46125	6.23232	6.71717	4.89186	5.23724	5.28992	5.98067	6.05506	6.85436	5.34009	5.39148	6.03438	5.66298	5.72068	5.80594	5.77042	5.60327	6.46105
GRMZM2G033894_P01	4.46255	5.86642	6.87057	4.6001	5.85134	7.20696	4.42228	5.70528	6.7518	4.90098	5.89887	7.40192	4.08294	5.54762	6.67217	4.39921	5.80787	6.82732	3.9929	5.00915	6.01175	4.13905	5.31345	6.25752
GRMZM2G044074_P02	6.94222	5.13584	6.10735	7.17917	5.65829	7.15892	7.44396	5.69716	6.70175	7.95928	5.99519	7.49198	5.87627	4.60666	5.39196	6.4527	5.11356	5.95953	6.49886	4.84404	5.92398	6.64755	4.94926	6.26453
GRMZM2G166646_P01	6.04491	4.68848	5.81043	5.68709	4.2279	5.52597	6.62505	5.00787	6.075	6.28908	4.58659	6.04749	5.87006	4.27085	5.53065	5.82447	4.28182	5.48792	6.22601	4.28273	5.708	6.43333	4.65375	5.81453
GRMZM2G448001_P01	5.37972	5.34079	5.95845	4.78215	4.63586	5.29802	5.95621	5.7264	6.59589	5.1355	5.05648	5.70784	5.5753	5.58902	6.3822	5.32245	5.24213	6.15459	5.65419	5.4909	6.23207	6.19448	5.91841	6.67095
GRMZM2G015989_P02	15.5934	15.8604	17.6248	18.0442	18.3767	19.6443	13.4333	13.4591	15.5575	14.9425	15.4948	16.8011	12.9098	12.7154	14.7071	13.7194	14.1146	15.3236	12.924	13.051	14.5849	13.4333	12.9281	14.7567
GRMZM2G036034_P01	5.82966	5.93189	5.26362	6.27281	5.80899	5.93591	5.58137	5.4505	5.03934	6.21529	5.91376	5.94765	5.71872	5.51336	5.53153	5.60485	5.80842	5.44875	5.48394	5.21093	5.34472	6.29335	5.36215	5.48846
GRMZM2G060702_P02	4.66525	5.53986	6.40613	4.97086	5.89823	6.83924	4.44265	5.28164	6.2658	4.93469	5.98393	7.01976	4.88414	6.12751	7.0995	5.03949	6.06296	6.93301	4.53726	5.78527	6.22816	4.52566	5.3206	6.20839
GRMZM2G018607_P01	5.66991	4.88188	4.13021	5.57697	5.03942	4.48523	4.23266	4.18387	4.5566	4.40314	3.95012	4.49342	5.65347	4.52684	4.36477	5.43422	4.79498	4.36841	4.37695	4.13833	4.15022	4.65269	4.48455	4.45114
GRMZM2G070605_P01	4.18521	6.22189	5.74731	3.74633	4.61083	3.97839	4.20017	5.89645	5.01956	3.89761	6.45001	4.73905	4.12329	6.5035	5.97205	3.65572	6.11556	5.17013	4.79367	7.08283	6.27542	4.39801	7.11892	6.09808
GRMZM2G071071_P01	5.27618	6.04277	5.91257	5.32882	6.07955	5.82154	5.38736	5.50434	5.22669	5.32452	6.19471	5.64587	4.96038	5.59719	5.87488	5.03182	5.84018	5.61167	5.60755	5.7636	5.48759	5.08337	5.97765	5.41918
GRMZM2G075624_P01	5.0792	5.89446	5.31769	5.78559	6.7802	5.66313	5.60835	6.54154	5.53365	6.61625	7.89168	6.60221	5.17545	6.20262	5.20152	5.30889	6.92229	5.44973	6.29488	7.66594	6.17386	6.1314	7.10128	6.05821
GRMZM2G110277_P04	5.13327	5.8549	5.81286	4.91857	5.83184	5.91482	5.08653	5.56498	5.57888	5.23394	5.74538	5.95077	5.63869	6.37479	6.58256	5.55445	6.33848	6.42697	6.2833	6.60246	6.87253	5.15125	5.68717	5.8606
GRMZM2G003565_P03	5.03395	5.91888	6.27693	4.61801	5.57187	5.53604	5.46744	6.36554	6.55253	4.79391	6.18724	5.71709	4.91669	5.72917	6.38384	4.49823	5.58628	5.74366	5.31509	6.4646	6.27261	5.35669	6.17643	6.51731
GRMZM2G004528_P03	4.43924	4.01341	5.13694	3.48002	3.89269	4.84588	3.80057	4.18092	5.09741	3.74808	4.4257	5.14361	4.19499	4.50005	5.25552	4.07671	4.36513	5.18211	4.63868	5.1471	5.75089	4.62172	4.47499	5.58765
GRMZM2G010960_P01	4.03151	4.09267	4.28752	3.8629	3.88585	4.10662	5.31287	5.60173	6.27173	4.68099	5.0609	5.16891	4.0532	3.95757	4.35552	3.78801	3.978	4.11795	5.06896	5.18391	5.15888	5.20156	5.23937	5.53288
GRMZM2G056661_P04	2.6319	2.9691	2.79387	2.88563	3.09379	2.69523	2.62922	2.87558	2.44838	2.84102	3.52838	2.6748	2.6784	2.93059	3.01538	2.669	3.13474	3.10094	2.77947	3.13749	2.53203	2.88536	3.33034	2.73937
GRMZM2G078143_P01	5.94002	6.29619	7.42278	6.45521	7.4255	8.97756	6.42279	6.9073	7.90711	7.11541	7.74717	9.51727	4.744	5.36026	6.36656	5.65001	6.04973	7.07021	5.80975	5.97453	7.25585	5.8628	6.23932	7.48267
GRMZM2G095326_P01	3.07093	2.68387	2.93742	3.16258	2.83145	3.11244	2.88209	2.43533	2.71409	3.09676	2.7518	2.8941	3.03587	2.59996	2.89702	3.11922	2.68734	2.95468	2.83042	2.44705	2.74834	2.80213	2.5632	2.7419
GRMZM2G041797_P01	3.81999	3.58363	3.53801	4.11655	3.80156	3.8442	4.0127	4.01166	3.46321	4.19453	4.63487	3.9606	3.95759	3.55079	3.59987	4.10343	3.60863	3.81659	3.87961	4.26356	3.83371	3.9156	4.54531	3.94382
GRMZM2G050647_P01	3.08189	3.2003	3.82704	3.35378	3.09764	4.09818	3.28929	3.29123	3.67538	3.59559	3.25194	3.98865	2.91324	3.3283	4.08095	3.09212	3.4715	4.32682	3.37765	3.22152	4.0687	3.29643	3.13757	3.93427
GRMZM2G057281_P01	8.17171	5.37274	5.27923	7.57343	5.29207	5.46455	6.43909	4.22183	3.92782	6.9592	5.02133	4.79814	8.04089	5.44622	5.33233	7.97866	6.11091	5.50225	7.17617	4.84011	4.40466	6.66085	4.69479	4.29103
GRMZM2G085054_P02	5.82729	5.56478	6.24788	5.84389	5.68905	6.4497	5.23258	4.68558	5.38165	5.43181	4.87774	5.84422	5.181	4.69544	5.54211	5.30492	4.97245	5.62234	4.5608	4.18522	4.9034	4.61772	4.32974	5.00871
GRMZM2G175423_P01	5.35117	4.81966	4.54913	4.71847	4.27445	4.08721	5.46307	4.96823	4.67383	4.9375	4.60638	4.17686	6.38959	6.29645	5.98268	5.44929	5.04716	4.60374	5.79613	5.44333	4.86588	5.89477	5.54433	5.06066
GRMZM2G326111_P01	7.49734	8.9322	8.53419	7.53318	8.93036	9.55916	6.36138	7.94393	7.62155	5.78014	7.66302	7.30283	6.37428	8.04617	7.84013	6.58069	8.02775	7.67467	5.30211	7.37842	6.57481	5.57087	7.07816	6.89266
GRMZM2G400173_P01	4.98313	5.33257	4.67875	4.54707	4.81699	4.30087	5.09227	5.08257	4.62786	4.63903	4.71719	4.3183	5.03669	4.92717	4.62786	4.93109	4.80867	4.44552	5.0857	5.26345	4.49311	4.68501	5.05139	4.50772
GRMZM2G456570_P01	2.98297	2.42597	3.06781	2.98327	2.33039	2.97517	2.94808	2.38226	2.98367	2.90074	2.39451	2.94692	3.05701	2.29389	3.01769	2.98813	2.3083	2.97669	3.05185	2.36714	3.03713	3.08796	2.49754	2.99491
AC212835.3_FGP007	5.67213	6.17891	6.15184	5.49092	6.03845	6.0926	5.51393	5.81099	6.0582	5.58584	6.20315	6.1098	5.14691	5.60154	5.89387	5.16474	5.74759	5.84036	5.05947	5.56177	5.848	5.36608	5.8576	6.00533
GRMZM2G028313_P03	4.07057	4.43162	5.16852	3.98708	4.27011	5.21475	3.68964	4.07433	4.77898	3.7362	4.04497	4.87455	3.7354	4.29057	4.83195	3.74182	4.11705	4.81274	3.45241	3.76421	4.54057	3.58688	4.00715	4.77794
GRMZM2G083016_P01	42.4941	39.9274	42.2642	34.7184	35.1145	36.1559	43.8189	43.0378	41.8997	39.2792	39.4076	38.5858	43.262	41.1715	44.0657	38.5198	38.9902	39.0844	47.2195	44.155	45.0754	44.688	44.196	43.8688
GRMZM2G145496_P01	4.62785	6.33868	7.4645	4.35824	6.30505	7.15071	4.32813	6.12967	7.80118	4.39958	6.7191	7.11306	4.02617	6.13363	6.83249	4.31824	6.50614	6.94029	3.64602	5.79474	5.98784	4.29578	6.07297	6.70993
GRMZM5G864266_P01	4.59774	4.35538	4.1924	4.90883	4.69138	4.53763	4.66192	4.44353	4.30592	4.96811	5.0684	4.66177	4.76889	4.62593	4.51977	4.91151	4.6268	4.65922	4.72744	4.64905	4.65752	4.45557	4.53953	4.46578
GRMZM2G040511_P01	4.07102	5.513	4.84296	4.33722	5.91147	4.96722	3.72118	5.21856	4.42208	3.99945	5.72489	4.73869	3.84021	5.14316	4.79392	4.27852	5.96485	5.23813	3.95521	5.26314	4.61586	3.79718	5.26094	4.38114
GRMZM2G083836_P01	4.66397	4.54672	5.10594	4.57217	4.68369	5.38915	4.6151	4.49742	5.06202	4.80509	5.02153	5.57829	4.51234	4.41387	5.1385	4.37121	4.45359	5.04186	5.25815	5.07129	5.71731	5.20198	5.31189	5.96693
GRMZM2G091560_P01	5.04361	5.48889	4.75575	5.13848	5.52314	4.7486	5.54338	6.04839	5.43725	5.61228	6.12792	5.35343	4.95674	5.59218	4.80432	5.08006	5.67337	4.80623	5.17193	5.73743	5.01435	5.45351	5.80868	5.08007
GRMZM2G156227_P01	4.45992	4.3319	3.74361	4.15696	4.03552	3.73244	5.0258	4.8034	4.55446	4.16514	4.36736	3.91318	4.93285	5.09278	4.44771	4.73059	4.86119	4.47315	5.05592	5.0131	4.18912	4.47283	4.49476	3.94633
GRMZM2G375504_P01	5.25137	5.32546	4.77337	5.55131	5.34736	4.92602	5.2185	5.31958	4.65888	5.833	6.07441	5.29462	4.50751	4.68869	4.40574	4.77198	4.99265	4.43521	4.75946	4.97662	4.63666	5.10687	5.27524	4.8695
GRMZM2G095082_P01	4.44536	4.36279	4.78154	3.81518	3.55074	3.51346	4.86873	4.91181	5.0096	4.03351	4.46579	4.06249	4.60258	4.74858	5.05605	4.11234	4.62443	4.38904	5.19777	5.0893	5.06534	4.92453	5.24656	5.12248
GRMZM2G300801_P01	5.66482	5.42456	5.46588	5.9267	5.9906	6.06274	5.53697	5.56113	5.61208	5.63118	5.69222	5.91927	4.64311	4.76802	4.61769	4.89321	4.91885	4.80332	4.65377	4.69178	4.59743	5.05023	4.95286	4.92159
GRMZM2G016066_P01	9.27505	11.7313	11.4864	9.55724	6.69535	7.69105	10.1495	10.4083	11.7126	10.1485	13.1545	9.0479	8.43518	10.2193	12.3565	8.23553	11.6022	11.0921	15.6446	15.2242	14.3494	15.5544	14.9649	15.264
GRMZM2G109472_P03	3.47957	2.98288	2.56249	3.71464	2.99942	2.86667	3.11591	2.70985	2.22016	3.3436	2.86587	2.53535	3.12083	2.6153	2.22733	3.24732	2.66582	2.29364	2.91212	2.51661	2.09034	3.06602	2.64425	2.20403
GRMZM2G466833_P01	6.40646	4.72468	4.03801	6.56951	4.37458	3.64593	4.81278	5.2178	5.02616	4.34869	3.95343	4.60409	6.58509	4.58819	4.79536	6.21449	4.90463	4.34059	4.74211	5.01915	3.93669	4.32087	4.21753	4.61318
GRMZM2G540403_P01	6.4885	4.22731	4.96627	6.2733	4.36336	4.95758	6.6716	4.68527	5.44188	6.36831	4.63024	5.13401	6.1204	4.19785	5.18106	6.48724	4.502	5.15294	6.17766	4.13373	4.98059	6.41299	4.26024	5.18567
GRMZM5G852502_P01	4.18141	5.7027	6.66258	4.31673	6.33028	8.0889	5.79714	4.49389	3.03925	5.69376	4.10332	3.44001	3.9806	5.64765	6.38018	4.47208	5.89682	6.7402	5.73652	3.83096	2.37922	4.82175	3.99438	2.26967
GRMZM2G306345_P01	11.2472	9.85678	8.83002	8.77935	7.52033	7.22055	11.437	9.40546	9.24793	9.52705	8.33154	7.85011	11.3771	9.84908	8.70483	9.68292	8.6568	7.63035	10.957	8.52304	8.44184	9.99239	8.85696	8.07437
GRMZM2G044306_P01	3.81105	3.07861	3.30057	3.67134	2.93688	3.10856	3.86234	2.97216	3.25025	3.68091	3.00284	3.15888	3.64838	2.92461	3.33433	3.5282	2.89639	3.21549	3.91095	3.09118	3.31315	3.88683	3.09732	3.31878
GRMZM2G056975_P01	6.11492	4.75052	4.82703	6.01761	4.90195	5.11373	6.13999	5.18695	4.80607	6.48505	5.08616	5.27805	5.82419	4.6888	4.83191	5.81285	4.89326	4.83484	6.06716	4.68831	4.61835	5.53823	4.80405	4.69002
GRMZM2G155216_P02	23.2088	28.8572	26.6271	23.9524	26.7303	22.0267	18.7492	23.6109	20.5956	22.6201	26.6003	21.5403	26.1374	31.6427	27.8073	25.9775	29.832	26.2636	25.2484	29.0935	24.8351	21.1061	24.633	23.3042
GRMZM2G314898_P01	4.97693	5.21853	5.65108	5.2053	5.41349	6.13915	5.01972	5.15702	5.44077	5.44462	5.78933	6.23099	4.58785	4.81819	5.48612	4.70875	5.0611	5.52467	4.86548	5.17422	5.53771	5.19137	5.36813	5.9895
GRMZM5G825759_P01	5.52158	4.91488	3.68358	5.95882	5.51862	3.79365	5.10114	4.644	3.21322	6.14087	5.90318	4.03807	6.27253	6.0056	4.53305	6.61875	6.29338	4.44651	6.94058	6.50231	4.56455	5.44573	5.21803	3.72739
GRMZM2G053236_P01	3.72688	5.11972	5.33796	4.28716	5.00517	5.58313	3.67565	4.5933	5.6859	4.347	4.98127	5.49602	4.05272	4.86772	4.9702	4.14371	5.0226	5.21694	3.87607	4.71881	4.8278	3.89082	4.69141	4.88205
GRMZM2G085854_P01	5.65186	5.39086	5.01626	5.59545	5.35657	5.24634	4.57276	4.04957	3.63374	4.36889	4.09564	3.78312	5.31227	5.39943	5.29597	5.32344	5.32015	5.1912	4.0846	3.61944	3.4588	4.09074	3.76835	3.37458
GRMZM2G312521_P01	4.04902	3.77324	4.02292	3.92371	3.64862	4.11492	4.24109	3.82936	4.50733	3.65708	3.72077	4.31562	4.53426	3.9722	4.77136	4.06776	3.80786	4.65967	4.41676	4.14565	4.57794	4.11031	4.10229	5.03025
GRMZM5G892645_P02	4.9818	4.29594	4.69998	4.79983	4.14633	4.73837	4.84671	4.18541	4.55926	4.82655	4.04378	4.6218	4.78924	3.9114	4.54457	4.78773	4.08833	4.4915	5.01205	4.13708	4.59242	4.95609	4.19172	4.75211
GRMZM2G110504_P01	3.97173	3.3453	3.65586	3.35753	3.29891	3.37775	8.73034	7.83505	9.12095	6.06053	6.46627	6.68144	4.02942	3.79069	3.9438	3.8228	3.58883	3.63961	7.29081	7.61399	7.55545	7.73684	7.06097	8.02514
AC234528.1_FGP005	4.55241	4.47079	4.47697	4.51126	4.39513	4.60402	4.76638	4.68854	4.82136	4.76547	4.46903	4.95248	4.10892	4.1215	4.10083	4.34804	4.24512	4.15029	4.32472	4.2174	4.37534	4.62282	4.39249	4.51872
GRMZM2G003384_P01	5.07025	4.49722	4.87569	6.05967	5.4258	5.93193	4.97704	4.16202	4.3483	6.23413	6.1386	6.0378	4.47111	4.39302	4.7606	5.10464	4.98825	5.25351	5.0842	4.66827	4.94951	4.99897	4.72683	4.84267
GRMZM2G017671_P01	3.97952	4.39471	4.13644	4.34582	4.87019	4.65495	4.00797	4.58701	4.26023	4.7631	5.25653	4.90003	3.95976	4.41623	4.33234	4.15615	4.60633	4.41945	4.45725	4.95185	4.76165	4.33041	4.91716	4.53491
GRMZM2G018441_P01	6.04408	7.09865	6.50494	4.67458	5.55182	5.03012	5.08386	6.07805	5.23709	4.36157	5.32309	4.65427	6.56294	7.5858	6.84777	5.79162	7.02917	5.88466	5.26125	6.18155	5.3374	5.22008	6.15188	5.50374
GRMZM2G056569_P01	4.88148	4.56504	4.82573	5.19481	5.19856	5.27607	4.71811	4.49657	4.49768	5.33471	5.29282	5.31875	4.76554	4.57676	5.02284	5.08702	5.12728	5.11205	5.12534	4.87453	4.98016	4.89298	4.86843	4.96673
GRMZM2G130064_P01	4.06256	4.15932	3.95153	4.12736	3.94827	3.88465	3.92591	3.81662	3.55904	3.55542	3.72158	3.49575	4.5045	4.30372	4.29027	4.30264	4.31853	4.32053	3.62187	3.77835	3.65537	3.89974	3.95361	3.84286
GRMZM2G146819_P01	3.35297	3.07383	2.4003	3.31603	3.0476	2.35102	3.46616	2.96077	2.32279	3.36077	3.01293	2.28307	3.35399	2.95142	2.40963	3.31637	2.93966	2.35676	3.43024	2.94207	2.3802	3.40347	3.07172	2.49624
GRMZM2G161673_P01	5.44261	5.9396	5.52716	5.87035	6.52227	5.92524	4.62844	4.98475	4.54865	5.47266	6.58938	5.42202	5.33795	6.07444	5.66186	5.61757	6.72666	5.8431	5.00037	5.67419	5.23475	4.63005	5.48871	4.83722
GRMZM2G407996_P01	30.4588	30.9759	28.5483	27.2009	28.5917	27.1425	32.4738	33.195	29.8229	29.9604	28.0079	28.9874	29.0067	28.7996	26.7776	29.3728	29.1755	26.5437	29.9696	30.4196	26.7861	31.557	31.8348	28.3915
GRMZM5G887631_P01	3.79836	4.71366	4.23408	4.32963	5.24107	4.75683	3.80762	4.49103	4.51803	4.4855	5.04415	5.04816	3.98895	4.88854	4.25145	4.11473	4.9808	4.61398	4.36396	4.90966	4.76464	4.11126	4.7311	4.81284
GRMZM2G053322_P01	5.43274	5.51719	5.59391	5.55095	5.90264	5.86689	5.3755	5.68901	5.60632	5.76192	6.45594	6.34574	4.71396	4.92263	5.09701	4.98801	5.48498	5.4123	5.09774	5.37308	5.41681	5.07918	5.65453	5.66103
GRMZM2G089713_P07	5.62287	5.1621	5.75108	7.85222	7.27856	8.25607	5.69307	5.11163	5.35033	7.28539	6.57754	7.33885	5.46289	5.00552	5.58796	6.31458	5.52729	6.16199	6.23919	5.4387	6.07902	6.5298	5.89866	6.47469
GRMZM2G127230_P01	3.58961	3.01396	3.19839	3.81956	3.37339	3.6814	3.85016	3.2886	3.57385	4.33344	4.02711	4.23491	3.34074	2.97187	3.2948	3.47171	3.23638	3.38005	3.83641	3.55341	3.82666	3.75838	3.53528	3.80994
GRMZM2G397247_P03	4.81389	5.58589	5.56745	4.27956	4.74179	4.83291	4.94179	5.69532	5.8335	4.52006	5.03434	5.42922	5.03068	5.54189	5.92778	4.60697	5.18281	5.50557	4.89883	5.49075	5.83813	4.90821	5.72721	6.06543
AC234203.1_FGP004	5.46821	4.74488	4.75488	5.60696	5.03722	5.18104	4.55129	4.11487	4.0098	4.82825	4.36041	4.36414	4.36844	3.92287	3.90781	4.64379	4.01405	4.09982	4.22431	3.82832	3.78427	4.30875	3.97738	3.89823
GRMZM2G044143_P01	2.88858	1.71655	2.93495	2.99081	1.77971	2.96927	2.77328	1.64742	2.70169	2.88074	1.89651	2.89743	2.93737	1.70037	2.95269	2.86215	1.68718	2.88056	2.82033	1.73714	2.78749	2.84676	1.83512	2.87591
GRMZM2G106424_P01	6.9226	7.88167	8.24023	12.8787	13.5113	12.6664	1.57064	2.5263	2.13384	1.67458	3.23219	2.55139	9.56302	10.5552	11.5865	11.3142	12.6204	12.4274	1.47825	2.59072	1.86554	1.59799	3.08217	2.52875
GRMZM2G121186_P01	4.38491	3.51886	4.06916	4.97254	3.89375	4.09708	5.79541	4.6672	4.86561	5.41338	4.49477	4.61555	4.84918	3.75171	4.70768	5.52082	4.35344	5.06901	5.59732	4.6407	5.15475	5.46644	4.67957	5.42116
GRMZM2G536644_P01	4.82159	5.40962	5.06795	4.44223	4.76832	4.32812	4.79967	5.39016	4.75074	4.46225	5.39961	4.32664	4.35883	5.32063	4.89574	4.49704	5.40962	4.68591	4.87449	5.56035	4.86407	4.74391	5.74168	5.08082
GRMZM2G553687_P01	3.6882	4.03098	3.53547	4.46671	4.95796	4.10606	3.44786	3.83681	3.17932	4.40811	4.97689	4.04232	3.27354	3.41421	3.03174	3.54318	3.88998	3.41456	3.62663	3.8924	3.35462	3.54577	4.00077	3.33592
GRMZM2G030422_P03	2.88555	4.17585	4.5536	2.86102	4.1215	4.93582	2.71323	3.83661	4.3008	2.74661	3.97658	4.31942	2.71266	3.90042	4.25378	2.6887	4.05316	4.74494	2.73006	3.7975	4.48376	2.66216	4.13838	4.40788
GRMZM2G043212_P01	3.96105	5.42406	5.17659	4.10576	5.5414	5.33015	4.35772	5.70676	5.96972	4.57738	5.94732	5.89372	3.83707	5.20057	5.07111	4.25885	5.70036	5.32187	3.74937	5.07202	4.98218	4.15281	5.40752	5.25466
GRMZM2G063756_P01	5.2155	4.93859	4.88425	6.81167	6.36713	6.34774	4.09834	3.95668	4.00715	5.05635	4.74802	4.6698	4.02293	3.88479	3.77933	4.34122	4.12066	4.21416	3.81333	3.57357	3.60252	3.64066	3.41057	3.49505
GRMZM2G118403_P01	1.4405	1.7002	1.92393	1.65502	1.81667	2.08844	1.17054	1.27867	1.49324	1.23446	1.29455	1.40688	1.43708	1.60094	1.98106	1.57786	1.76571	2.10334	1.25052	1.27354	1.50796	1.23402	1.26973	1.49515
GRMZM2G134917_P01	6.2038	6.12026	5.69719	5.77322	6.30505	5.91529	5.88529	6.07793	5.83653	5.31021	5.62012	6.03524	5.57681	5.33637	5.91408	5.71011	5.65649	5.75596	5.84046	5.38526	5.79352	5.70009	5.49852	6.0522
GRMZM2G314647_P01	3.42305	3.75004	3.67713	4.18236	4.37534	4.39546	3.65662	3.12955	3.76797	4.46218	3.91066	4.28714	4.98329	3.57707	4.03592	4.26522	4.27615	4.04314	5.04265	3.5932	4.13967	3.98463	3.38798	3.65357
GRMZM2G316191_P01	0.125349	0.249033	0.36077	0.122034	0.237745	0.33921	0.116994	0.229396	0.388374	0.12804	0.25841	0.402047	0.113728	0.245287	0.379713	0.143502	0.266099	0.375217	0.122865	0.237305	0.366371	0.127489	0.276725	0.3883
GRMZM2G374574_P01	3.97743	2.62565	3.50288	3.69761	2.52647	3.33412	3.65558	2.52157	3.21964	3.5972	2.67932	3.29071	3.7984	2.58423	3.38454	3.6509	2.61911	3.37544	3.77661	2.66216	3.37824	3.84627	2.78149	3.51443
GRMZM6G924006_P01	4.71474	5.1497	5.22843	4.51321	5.14615	5.62453	4.8427	5.15275	5.73583	4.70697	5.3448	5.78821	4.54885	5.01558	5.46413	4.47711	5.06689	5.32282	4.56394	4.95156	5.3059	4.63248	5.17257	5.53014
GRMZM2G015238_P01	4.7142	4.57802	3.93642	4.29124	4.22382	3.84028	4.5011	4.40907	3.85413	4.32182	4.47748	3.80943	4.61182	4.54497	4.07489	4.45338	4.54683	3.79874	4.55762	4.49703	3.81694	4.54882	4.72277	3.86916
GRMZM2G023906_P01	3.51035	4.85495	3.80416	3.75061	5.05473	4.28937	3.63013	4.95436	3.99223	4.05827	5.41326	4.3306	3.65702	5.13483	4.06507	3.71988	5.07065	4.15256	3.96294	5.36501	4.35565	3.7108	5.1522	4.01035
GRMZM2G091155_P02	10.2365	10.323	10.9603	18.5879	17.823	16.4427	1.46104	2.94036	2.71077	2.17174	3.39669	3.02061	15.8272	14.4263	16.8776	18.646	18.1476	17.1254	1.5311	2.40858	2.42798	1.53847	2.53434	2.43474
GRMZM2G123204_P01	5.55319	6.66053	6.65585	4.64249	5.68874	5.5522	5.55484	6.51725	6.39824	4.69392	5.82738	5.78651	6.04254	7.17129	7.37475	5.07323	6.39652	6.46081	5.8479	6.86483	6.90813	5.59189	6.87346	6.86353
GRMZM2G143008_P01	4.25942	4.11157	4.93855	4.83442	4.58156	5.28051	4.56778	4.4989	5.0009	5.12687	4.92189	5.86036	3.87365	3.76034	4.37788	4.12481	3.97267	4.47381	4.03492	4.0352	4.34527	4.17814	4.11787	4.72272
GRMZM2G170870_P01	4.20165	4.17172	4.77921	3.57591	4.15119	4.86301	4.72748	4.67323	5.31475	4.60667	5.3063	5.87509	3.94144	4.42017	5.36781	4.15518	4.82909	5.52153	4.41423	4.92923	5.72781	4.37744	4.51905	5.55079
GRMZM2G181505_P01	4.57056	4.88038	5.21762	4.76518	4.90568	5.43318	3.5961	3.57604	4.11873	3.78934	3.70117	4.46214	4.3732	4.89444	5.2451	4.38831	4.67978	5.16955	3.64738	3.61775	4.10975	3.86994	3.74476	4.24394
GRMZM2G478664_P01	3.88104	4.4195	4.1054	3.60707	4.0145	3.70551	3.58684	4.22328	3.84628	3.40826	4.02977	3.68429	3.59753	4.37729	4.02338	3.6147	4.43387	4.01807	3.69521	4.20353	3.7863	3.60936	4.29827	3.83078
GRMZM2G030784_P02	7.24239	6.02527	6.57608	7.39052	6.11671	7.2815	7.17964	5.88033	6.4167	7.10448	6.20753	6.51018	7.2402	6.16648	6.98696	7.05778	6.1615	6.74218	6.77757	5.82994	5.86124	7.00743	5.61222	6.62517
GRMZM2G054201_P01	4.32859	4.39256	4.63763	5.13607	5.45034	5.83848	4.84278	4.92057	5.34737	5.45165	5.87399	6.19097	4.2154	4.53672	4.95773	4.50027	4.85468	5.30069	4.95345	5.08286	5.32403	4.5718	4.88828	5.4031
GRMZM2G077215_P01	3.64358	3.81094	3.82625	3.56787	3.88188	3.7356	3.18077	3.38724	3.49771	3.22219	3.46012	3.42618	3.29111	3.56944	3.56387	3.19612	3.60471	3.41777	2.87651	3.00347	3.18982	3.02185	3.28219	3.3428
GRMZM2G346455_P06	4.67149	4.24566	5.12593	3.57438	3.33384	3.8773	6.24037	5.60777	6.75548	4.85927	4.49217	5.31562	4.40138	4.16665	5.08451	3.79131	3.69822	4.45099	5.62614	5.20453	6.07799	5.83566	5.25116	6.31218
GRMZM2G027282_P01	5.02233	4.5508	4.5056	5.84422	5.08664	5.27705	4.53641	4.14993	4.15815	5.64599	4.81714	4.76529	4.98319	4.84287	4.55306	5.4935	5.10605	4.53425	4.79868	4.14858	4.03144	4.67568	4.298	4.17517
GRMZM2G030016_P02	3.33369	3.76645	4.55485	3.8691	4.59701	5.60654	3.33831	3.70925	4.58108	3.96169	4.3786	5.72412	3.27241	3.827	4.8645	3.55642	4.03612	4.91509	3.47109	3.97001	5.02846	3.19729	3.71557	4.72536
GRMZM2G109425_P01	3.76898	4.20122	3.5987	4.1397	4.72536	4.01226	4.95507	5.39708	4.42474	5.38371	5.88518	4.99629	3.79108	4.29663	3.70343	3.82613	4.40435	3.87	5.35285	5.73464	4.84616	4.78247	5.35553	4.54842
GRMZM2G143568_P01	3.67152	3.46591	3.65035	3.81971	3.40008	3.69043	4.00041	3.77659	4.00267	4.12555	3.72453	3.99065	3.63409	3.26539	3.423	3.59931	3.27479	3.58295	4.00193	3.4125	3.70464	4.14747	3.6802	3.95531
GRMZM2G439201_P02	4.65899	4.46122	4.29725	6.07474	5.74409	5.88671	5.55712	5.48716	5.35286	6.70753	5.82072	6.604	4.82127	4.79479	4.56332	5.46526	5.18328	4.88692	5.42702	5.53943	5.19192	5.28806	4.96932	5.21701
EF517601.1_FGP012	4.69808	3.67229	3.57624	5.65938	4.1581	4.17128	5.52027	4.18704	4.15097	6.84181	5.07726	5.21703	4.65347	3.52073	3.48111	5.22094	3.71462	3.77435	5.82151	4.33933	4.19052	5.58455	4.33064	4.4385
GRMZM2G011129_P01	3.57542	3.96143	4.50241	3.39409	3.99773	4.04809	3.43925	4.0889	4.22757	3.33862	3.70237	4.11659	3.73222	4.09385	4.46556	3.60351	4.13634	4.42221	3.49507	4.03527	4.13219	3.42182	3.98412	4.08538
GRMZM2G031859_P01	3.18316	2.5329	3.18917	3.16966	2.36005	3.27789	2.93743	2.24974	2.87182	2.98858	2.28726	3.08415	2.92927	2.51114	3.27202	3.05166	2.38057	3.27038	2.85238	2.32028	3.04958	2.88785	2.35805	2.985
GRMZM2G071087_P01	4.9588	4.15486	4.36205	4.49724	3.51339	3.93441	5.50411	4.33547	4.9704	4.68462	3.69122	4.23227	5.13649	3.97901	4.47741	4.95574	3.7984	4.39224	5.47807	4.13422	4.66713	5.78493	4.39343	4.96409
GRMZM2G109130_P01	3.87816	4.09764	4.69108	6.0462	6.32585	7.38515	4.57805	4.64989	5.3441	5.81665	6.28421	7.00617	3.48549	3.71028	4.44795	4.54853	4.97725	5.78585	4.35395	4.37519	5.11175	4.29297	4.57969	5.22793
GRMZM2G139300_P01	5.82158	5.31449	5.33071	4.18228	3.67434	3.60887	4.42826	4.01633	3.83416	3.60657	3.16539	2.94815	4.40015	4.10706	4.13786	3.81214	3.62066	3.29471	3.82619	3.40215	3.32398	3.92283	3.69958	3.52157
GRMZM2G153162_P01	3.50807	2.45464	3.32773	3.33013	2.47481	3.26059	3.19358	2.31269	3.1589	3.21702	2.30866	3.15987	3.27565	2.33765	3.02853	3.25392	2.52095	3.09208	3.00012	2.18689	2.89555	3.22151	2.40371	3.07676
GRMZM2G156069_P01	3.61159	4.70379	4.41991	3.94163	4.51619	4.08402	3.91549	3.58313	3.13375	3.80275	3.1942	3.57231	4.07438	4.05099	4.36332	3.87791	3.59533	4.42961	3.81991	2.97266	3.63536	3.95633	3.38371	3.36172
GRMZM2G015361_P05	5.50632	4.88806	5.17061	5.7858	5.38039	5.71508	5.32635	4.90094	5.01105	5.97882	5.56563	5.96063	5.11321	4.73898	4.87273	5.28883	4.85587	4.96805	5.40845	4.77167	5.07166	5.59223	4.89846	5.23018
GRMZM2G016236_P01	4.39261	4.42854	4.64581	3.64148	3.49342	3.69396	4.94185	4.63188	4.67763	4.17926	4.35764	4.10763	4.59053	4.75229	5.08346	4.00162	4.40089	4.47149	5.21779	4.91951	5.09729	5.03486	5.01583	5.22273
GRMZM2G033641_P01	4.90681	5.30386	5.26126	4.48096	5.15992	4.71786	3.97967	4.40137	4.33599	3.84339	4.37604	4.02927	5.07083	5.4656	5.36708	4.80071	5.33297	5.00311	4.43716	5.099	4.65191	4.48047	4.86124	4.63351
GRMZM2G040209_P01	3.86479	3.74179	3.96385	3.76651	3.83364	4.09667	4.17125	4.11742	4.26778	4.05749	3.89264	4.28015	3.60516	3.51401	3.82385	3.62141	3.5241	3.75645	3.97004	3.60475	3.89804	3.94334	3.77166	3.9132
GRMZM2G063700_P02	4.2781	4.12819	4.21389	4.89006	4.78083	4.68214	4.71577	4.73735	4.40371	5.29313	5.18441	4.90854	4.10683	3.83775	4.02366	4.60419	4.47478	4.31794	4.46796	4.27932	4.0326	4.64398	4.57736	4.41753
GRMZM2G113267_P02	4.24284	3.40222	3.77485	4.21395	3.54235	3.99912	4.7426	3.95254	4.33221	5.13177	4.2481	4.89696	4.04227	3.23488	3.83198	4.027	3.44882	3.83665	4.21271	3.48045	4.02205	4.38686	3.69064	4.30617
GRMZM2G117968_P01	6.42544	5.43587	5.49542	4.94519	4.51433	4.56113	4.7837	4.16548	4.12621	3.87085	3.30345	3.31703	6.26582	5.81311	5.87515	5.62671	5.04552	4.95998	4.52369	3.74183	3.71643	4.5586	3.98041	3.94864
GRMZM2G096695_P01	2.93549	4.28997	4.05968	2.60276	3.42507	3.47658	3.69126	5.51738	5.78264	2.93519	3.87287	4.34376	3.63095	5.04825	4.21685	2.99519	4.27718	4.264	3.12852	4.27803	3.9587	3.08064	4.29125	3.89779
GRMZM2G143917_P01	4.40683	4.88749	4.50231	4.35336	4.75327	4.44865	3.96852	4.45983	4.05902	4.19819	4.70575	4.42114	4.62862	5.19905	4.88968	4.72987	5.2162	4.66646	4.51904	5.03494	4.61054	4.19556	4.74347	4.4022
GRMZM2G013176_P02	3.58341	3.23906	3.70067	3.95199	3.79721	4.29746	3.89267	3.63349	4.06353	4.19029	3.99458	4.49701	3.26425	2.9979	3.59791	3.77229	3.50964	3.93311	3.59788	3.31161	3.87668	3.74722	3.5165	4.03363
GRMZM2G089696_P01	5.15471	5.60173	5.57561	4.9781	5.32298	5.22622	4.63218	4.84455	4.77972	4.51514	4.96686	4.76778	4.66145	5.04366	4.94031	4.7022	5.22855	4.90993	4.1478	4.36101	4.28113	4.20842	4.63066	4.5193
GRMZM2G336815_P01	4.57875	5.62919	4.74076	5.55702	7.16663	6.0358	4.52045	5.47088	4.47082	5.58411	7.14121	6.02515	4.64531	5.73492	4.63705	4.99788	6.54495	5.05931	5.35825	6.33811	5.14265	4.75824	5.97412	4.88846
GRMZM2G445905_P03	2.41876	2.12708	2.06623	2.82089	2.58877	2.50211	2.3229	2.06839	1.93935	3.2235	3.12017	2.49069	2.01615	1.7529	1.97216	2.25891	2.12708	2.00393	2.53307	2.03449	2.05377	2.40582	2.18111	1.97175
GRMZM2G030384_P01	4.41701	3.90927	4.26489	3.94636	3.78994	4.13869	4.88334	4.24867	4.41788	4.48862	4.19889	4.57045	4.2725	4.15147	4.47753	4.32814	4.12421	4.69449	4.69871	4.11078	4.61626	4.96531	4.46677	4.81982
GRMZM2G073465_P03	4.17904	4.21671	4.6763	3.5674	3.41601	3.78665	5.05982	4.38479	5.64452	3.7406	4.05155	4.42095	4.26108	4.26605	4.82434	3.72367	3.8149	3.97924	5.60027	5.00235	5.78441	5.86811	4.84765	5.88358
GRMZM2G096123_P01	6.89995	4.84073	4.44599	6.53041	4.96561	4.50762	6.50112	5.02601	4.91077	6.97186	5.27731	5.10176	5.18145	4.2977	3.64721	5.34924	4.01927	3.48868	4.89115	4.04384	3.71683	5.67483	4.52955	4.18114
GRMZM2G145088_P01	3.93445	3.96755	3.79767	3.88708	3.94432	3.96115	3.50811	3.57861	3.50896	3.53738	3.77208	3.72114	3.60324	3.73202	3.56306	3.72417	3.84458	3.64075	3.30669	3.47727	3.29252	3.49887	3.68356	3.51475
GRMZM2G181273_P01	5.30323	4.94355	6.00728	5.10077	4.83385	5.96168	4.43016	3.90112	4.72974	4.37928	3.99557	4.96556	5.50516	5.09507	6.30852	5.29413	5.12213	6.09009	4.46819	3.98819	4.92836	4.51908	4.12053	5.00877
GRMZM2G039263_P01	3.79743	2.76821	3.01601	3.63371	2.91357	3.2316	4.15973	3.30532	3.16781	5.06422	3.74843	3.97004	3.55919	2.60818	3.13715	3.66565	2.96917	3.11844	4.80983	3.42301	3.7198	4.31024	3.26411	3.63915
GRMZM2G105570_P01	4.58018	4.04637	4.28335	4.55096	3.83427	4.17337	4.73267	4.25484	4.42212	4.99748	4.60565	4.62877	4.18937	3.70323	4.16864	4.42084	4.01653	4.20172	4.22726	3.67984	3.97402	4.30123	3.85927	4.14802
GRMZM2G127147_P01	5.58527	4.6631	5.97058	5.14997	4.26513	5.62438	3.59893	2.89884	3.87444	3.26531	2.98691	3.48983	5.34234	4.7441	6.12833	5.07852	4.41866	5.38865	3.48296	2.99915	3.78287	3.4967	3.02411	3.74092
GRMZM2G450233_P01	5.31641	5.49298	5.51011	4.67449	4.7978	4.89775	4.80255	4.33098	4.80398	4.07201	3.82592	4.10575	5.54498	5.82013	6.29759	4.67395	4.85197	5.18021	4.40107	4.4186	4.39103	4.51455	4.46162	4.81358
GRMZM5G870342_P01	4.39281	5.37708	5.30141	4.61983	5.61041	5.33632	4.57872	5.21004	5.16751	4.56776	4.93218	4.88043	3.89584	5.17027	4.96952	4.42799	5.16762	5.1201	4.20462	4.6437	4.46204	4.31242	4.88869	4.76267
GRMZM2G044744_P01	2.72742	4.13123	3.6681	2.42386	3.57978	3.37297	2.78303	4.13205	3.68479	2.63437	3.95709	3.52239	2.81151	4.27717	3.92542	2.60019	3.99511	3.73781	3.08713	4.4411	4.08968	2.9325	4.48647	3.99884
GRMZM2G071021_P01	4.24149	5.22006	4.86128	5.01008	5.9886	5.46304	3.52354	4.24911	3.81721	4.2627	5.29438	4.54381	3.56509	4.36138	4.02855	4.18221	5.19265	4.52557	2.99168	3.71408	3.30522	3.22321	3.97975	3.45531
GRMZM2G077632_P01	4.34372	4.17784	3.5445	4.77004	4.52358	4.03796	3.21545	3.35351	2.72849	3.68285	3.70862	3.14452	4.12653	4.03137	3.38501	4.43389	4.36987	3.6337	3.16676	3.35011	2.78379	3.26075	3.48508	2.74204
GRMZM2G080107_P01	4.51437	5.38113	5.0786	3.93601	4.51518	4.45464	5.6057	6.81308	6.42471	4.86851	6.06163	5.69075	4.2065	4.92423	5.11664	4.29237	5.17633	4.97786	5.28805	6.82115	6.05465	5.28849	6.30728	6.20216
GRMZM2G090338_P01	4.85601	3.79965	3.93695	4.38304	3.72754	3.70699	4.63467	3.82548	4.12444	4.21855	3.79001	3.91491	4.26421	3.576	3.63207	4.32526	3.52163	3.49906	4.60158	3.77998	3.98542	4.71668	3.97972	4.20016
GRMZM2G095348_P01	4.27651	3.38504	3.96755	4.28899	3.74824	3.79343	4.40561	3.64564	3.9085	4.65519	3.83761	3.90736	4.32987	3.30997	3.70486	4.26747	3.64779	4.03303	4.22143	3.64243	3.83166	4.55493	3.78328	3.85361
GRMZM2G012030_P01	0.46465	0.451958	0.332197	0.467311	0.478052	0.315641	0.455335	0.491031	0.407614	0.53839	0.537321	0.356602	0.475663	0.459809	0.350441	0.527056	0.440022	0.424377	0.585149	0.59482	0.420556	0.486446	0.546987	0.392572
GRMZM2G070562_P01	3.30604	3.03765	3.25369	3.37859	3.09316	3.46345	3.07264	2.77286	2.90007	3.1593	2.96425	3.14604	3.02635	2.78439	3.04622	3.14059	2.83747	3.25859	2.90063	2.68793	2.93759	3.01585	2.8223	2.99435
GRMZM2G143870_P02	4.28527	4.76865	5.36112	4.51357	4.93264	5.65758	4.48961	4.77588	5.72966	4.16754	5.01318	5.37359	4.36431	4.93601	5.72315	4.06495	5.19309	5.52859	4.07041	4.78987	5.26086	4.04435	4.59068	5.36546
GRMZM2G144273_P01	4.70647	4.06273	4.11407	4.21176	3.48598	3.37922	5.21848	4.5208	4.55019	5.02828	4.24742	4.29025	4.82031	4.28144	4.16193	4.84528	4.03681	3.97584	5.05229	4.1409	4.23125	5.11713	4.22393	4.29726
GRMZM2G165747_P01	17.7074	14.6259	19.3454	23.3996	18.8395	22.7799	17.5047	18.0483	14.1525	20.0825	21.9992	16.5285	17.2268	14.8119	18.2466	20.1349	17.1952	20.7701	17.9084	17.9684	14.1323	19.0357	19.5116	15.0448
GRMZM2G166767_P02	5.09723	4.31517	4.08659	6.8849	5.79568	5.37899	3.55139	3.34507	3.73974	4.38066	3.54457	4.52477	3.66972	3.02211	3.1678	4.2736	3.49179	3.4035	3.06726	2.73158	3.33385	3.07524	2.75403	3.36475
GRMZM2G319062_P01	4.44454	4.70769	4.62247	4.65134	4.72949	4.93859	3.80485	3.86191	3.87609	3.35224	3.77469	3.50924	5.16397	5.41799	5.44823	5.42598	5.63605	5.80944	5.17536	5.5312	5.41911	4.9817	5.34098	5.37683
GRMZM2G462803_P02	1.77293	1.99982	2.17225	2.12381	2.20579	2.40172	1.83426	2.04609	2.15592	2.1641	2.50023	2.48981	1.64866	1.88801	2.04591	1.74137	2.03716	2.18944	1.83283	2.08951	2.28806	1.88204	2.23339	2.2569
GRMZM2G016189_P02	5.05269	4.91324	4.98735	5.00566	4.91708	4.98686	5.31311	5.14137	4.96057	5.18922	4.7096	5.14657	5.0896	4.72882	5.09499	4.86913	4.76532	5.01017	5.33789	4.94302	4.86682	5.1427	4.88154	4.94668
GRMZM2G039238_P01	3.53112	3.37148	3.0796	3.4079	3.31909	3.10487	5.34453	5.35082	4.47794	4.94113	4.78554	4.51226	3.77546	3.66217	3.23213	3.76815	3.59403	3.3753	5.14475	5.04027	4.55093	5.08697	4.87661	4.66697
GRMZM2G051276_P01	3.93001	5.2106	4.43087	3.17351	4.12112	3.63181	4.32928	5.43293	4.66337	3.73613	4.81803	4.04716	3.94429	5.24877	4.42339	3.53511	4.82061	4.00716	4.07711	5.08009	4.339	4.27456	5.26785	4.45724
GRMZM2G055489_P01	4.18926	3.64867	4.02569	3.71393	3.20626	3.44379	4.40698	3.52911	3.69284	3.9656	3.5931	3.60671	4.42862	3.8059	4.33904	3.97876	3.69986	3.80236	4.77111	3.78103	4.08649	4.54575	3.73606	4.00308
GRMZM2G086258_P02	1.77056	3.09766	3.36218	1.29531	2.48039	2.64425	1.65949	2.92232	2.94237	1.40067	2.61983	2.70925	1.75482	3.46065	3.73591	1.7716	3.18016	3.13503	1.75119	3.1284	3.29851	1.59635	3.1106	3.1725
GRMZM2G111014_P01	4.14812	3.43445	3.40572	4.26585	3.50656	3.68906	4.4552	3.66804	3.80803	4.75611	3.82377	4.09102	3.95465	3.20458	3.29449	3.95753	3.34305	3.50709	4.17652	3.44867	3.59367	4.28602	3.57088	3.61092
GRMZM2G156713_P01	4.38366	4.99619	4.58883	4.05361	4.44727	4.18532	4.31032	4.77614	4.5195	4.28885	4.64255	4.3226	4.1927	4.74748	4.54261	4.03528	4.49973	4.20242	4.34162	4.36177	4.20658	4.39395	4.52888	4.43214
GRMZM2G385931_P02	3.53186	3.85496	3.89198	4.05626	3.92991	4.73209	3.84192	3.79827	3.71968	3.93989	4.25921	4.48659	3.68539	3.50776	3.59355	3.87007	3.85757	3.56953	4.11594	3.60733	3.70316	3.95866	4.185	4.3034
GRMZM2G436710_P01	5.24215	5.08087	4.73858	5.72711	5.18826	5.18779	4.86399	4.48008	4.47866	5.31541	5.73738	4.82266	5.18024	4.86254	5.0427	5.42891	5.59402	5.00715	5.52694	5.8392	5.4996	5.71524	5.21764	5.22286
GRMZM2G017419_P01	4.0888	4.10524	4.4201	3.32029	2.7912	3.38682	4.09232	4.03205	4.68698	3.19951	3.39957	3.7796	3.9473	3.7892	4.82931	3.49346	4.02265	4.28416	3.29489	4.03696	4.1619	3.56343	3.82313	4.45113
GRMZM2G076885_P01	4.56657	4.31323	4.54873	4.46044	4.11712	4.50588	5.68806	5.25315	5.83632	5.06901	4.71551	5.19974	4.63627	4.28096	4.95526	4.55018	4.19967	4.83186	5.53273	5.05201	5.38974	5.49674	5.06835	5.73247
GRMZM2G096806_P01	2.59232	2.73725	3.50075	3.09015	3.25837	4.11995	3.20827	3.32666	4.62771	3.46025	3.54059	4.66381	2.18862	2.27482	2.93516	2.53793	2.68925	3.44783	2.83817	2.96023	3.75025	3.08428	3.21284	3.95455
GRMZM2G127609_P07	6.88529	6.06743	5.95415	7.67088	6.74172	6.77181	7.24714	6.43859	6.81901	7.08236	6.65242	6.50975	5.7957	5.10884	5.48935	6.10643	5.75215	5.49177	5.8522	5.51888	5.1589	6.36	5.71996	5.80527
GRMZM5G806449_P01	4.73033	3.70326	4.39093	4.91914	3.83256	4.43006	4.36575	3.32787	3.82092	4.35851	3.31979	3.96483	4.50772	3.268	3.99005	4.34547	3.30216	3.91527	4.84574	3.48581	4.04788	4.92735	3.76056	4.44006
GRMZM2G129155_P01	3.27611	3.82582	2.90155	3.24773	3.92969	2.97152	3.12781	4.12472	2.82819	3.19765	3.99866	2.94489	3.32906	3.85793	2.88201	3.17692	3.97171	2.71291	3.33129	4.12195	2.93781	3.31343	4.16952	2.82111
GRMZM2G164562_P01	3.58014	4.78754	4.59158	3.55847	4.722	4.54698	4.11672	5.4382	5.17329	4.19495	5.26045	5.18755	3.11481	4.38111	4.26555	3.48061	4.49427	4.35752	3.74284	4.8908	4.73873	4.21147	5.02564	5.1388
GRMZM2G404025_P01	4.67498	3.15821	4.21929	3.53483	2.66463	3.48099	4.22914	3.16053	3.78379	3.9237	3.03299	3.81101	4.6225	3.27978	4.35963	4.06543	3.13171	3.90755	4.65121	3.3669	4.32561	4.29822	3.20525	4.11212
GRMZM2G430680_P02	2.08585	1.67814	1.38114	2.07219	1.44146	1.49057	1.62785	1.4326	1.73006	2.06158	1.34964	1.55336	1.76733	1.54817	1.32922	1.99082	1.73324	1.48994	1.8175	1.30183	1.61647	1.57688	1.51492	1.40926
GRMZM5G803981_P01	3.79367	4.32546	4.88732	3.58875	3.95961	4.78274	3.36528	3.54132	4.07459	3.31385	3.46096	4.20706	4.23327	4.86344	5.33153	4.03725	4.42273	5.29119	3.356	3.83822	4.21801	3.31192	3.58826	4.20756
GRMZM5G869196_P01	4.07583	3.83696	4.6937	4.46255	3.98189	5.13997	4.34617	3.92466	5.11462	4.90521	4.41445	5.74264	3.65482	3.44007	4.42106	3.96109	3.47091	4.62339	4.15056	3.85925	4.98117	4.44377	4.07182	5.28346
GRMZM2G032163_P01	3.25826	3.54253	3.76547	3.18625	3.57716	3.92565	3.52124	3.66389	3.93248	3.57846	4.02332	4.28018	3.26212	3.66996	3.986	3.1631	3.75634	3.84062	3.56849	3.87626	4.14315	3.46208	3.89054	4.12645
GRMZM2G057942_P01	3.84633	4.64502	4.92603	3.59953	4.62194	4.73729	3.77707	4.37129	4.5192	3.62401	4.78118	4.53093	3.836	4.57105	4.94706	3.63856	4.56964	4.61162	3.85092	4.66858	4.84291	3.82758	4.77129	4.88496
GRMZM2G141587_P03	5.43565	5.31931	5.41178	5.98584	6.00694	6.14737	5.51941	5.2496	5.46367	6.16924	6.29952	6.38248	5.16795	4.85562	5.22099	5.54459	5.304	5.17019	5.59715	5.38269	5.50258	5.58018	5.58232	5.70094
GRMZM2G416667_P01	3.57511	3.7499	3.07096	3.57268	3.86505	3.1615	3.26007	3.68174	2.95848	3.25244	3.84002	2.93005	3.36346	3.6956	2.9798	3.3933	3.82154	3.03388	3.24446	3.58546	2.94395	3.33848	3.76069	2.9214
GRMZM2G427404_P01	3.67452	3.81517	3.75395	3.95626	3.91948	4.27283	3.40645	3.42239	3.83437	4.08364	4.42524	4.37413	3.30606	3.76885	3.90281	3.79146	4.17067	4.3807	3.38558	3.84982	3.86878	3.39602	3.62838	3.61244
GRMZM2G700926_P01	3.8575	2.98742	3.57045	4.07543	3.18172	3.78803	3.88786	3.04752	3.55247	4.35602	3.29033	4.01748	3.79023	2.97314	3.59994	3.87902	3.04038	3.70316	4.08773	3.21296	3.87866	4.06621	3.26652	3.88981
GRMZM2G010085_P01	2.70647	1.88864	2.36862	2.61755	2.1426	2.21264	2.95071	2.3005	2.40243	3.00203	2.29349	2.40723	2.40514	1.73671	1.99515	2.48912	1.92945	2.1941	2.98557	2.28277	2.21897	2.84341	2.42583	2.20086
GRMZM2G011070_P01	2.95134	3.69555	2.87936	2.8972	3.56697	2.87145	2.87701	3.65392	2.86881	2.87438	3.60087	2.86324	2.81234	3.62703	2.94207	2.81468	3.60897	2.84244	2.82961	3.60308	2.8776	2.94344	3.6436	2.85504
GRMZM2G012119_P01	3.56192	4.69127	4.32745	3.00815	3.78515	3.669	4.2033	5.4666	5.31315	3.47325	4.67819	4.36162	3.43977	4.63382	4.74538	3.25815	4.47221	4.02385	3.82153	5.17749	4.53817	4.23392	5.09528	5.02138
GRMZM2G027059_P01	3.8435	3.78545	4.67017	3.9309	4.06247	4.97398	4.29679	4.5724	5.34671	4.75953	4.91791	6.16438	3.56388	3.74908	4.45778	3.63388	3.82955	4.54733	3.94831	4.07098	4.81879	4.02322	4.01217	5.02086
GRMZM2G091419_P01	2.61451	3.15784	3.33205	2.98075	3.80314	3.90446	2.78712	3.27714	3.52354	3.24134	3.99609	4.27412	2.42426	3.02973	3.32625	2.71392	3.39141	3.60751	2.63995	3.10811	3.49726	2.59816	3.23654	3.5348
GRMZM2G169516_P02	4.4457	4.64232	4.03035	4.39745	4.52347	4.04305	4.99567	4.942	3.98195	4.81096	5.06601	4.18311	4.31797	4.62728	3.83475	4.36208	4.74049	3.92045	4.90377	4.64419	3.97242	4.7664	4.81424	4.03392
GRMZM2G445602_P01	4.30722	5.26666	4.68545	5.58608	6.52765	6.19804	3.74939	4.36706	3.95038	5.01665	5.92757	5.29124	3.66479	4.31911	4.22309	4.17023	5.04292	4.64299	3.77258	4.23302	3.99143	3.73307	4.31602	4.01738
GRMZM2G078826_P01	2.72777	2.60919	3.20265	2.94632	2.62439	3.32603	2.87903	2.67386	3.33564	3.12595	2.84315	3.43402	2.5918	2.54142	3.11933	2.67466	2.42804	3.03025	2.86068	2.59089	3.19913	3.1938	2.68906	3.35295
GRMZM2G102000_P01	3.60079	3.36274	3.12556	3.26032	3.36956	3.14527	4.47705	3.34293	3.72063	4.31266	3.34943	3.47284	3.58533	3.28155	3.21942	3.49296	3.2572	2.9832	3.94089	3.55434	3.12806	4.33	3.48225	3.20503
GRMZM2G104730_P02	1.60962	2.34886	2.23875	1.5121	2.24406	2.13525	2.11654	2.88704	2.54404	1.93897	2.89671	2.5107	1.66853	2.3406	2.14941	1.6038	2.31747	2.21108	2.2525	2.96021	2.5789	2.29794	3.00506	2.63186
GRMZM2G107696_P01	4.05986	3.97664	4.50937	3.90619	3.83113	4.43836	4.02985	4.19836	4.38243	4.03837	4.07068	4.50538	3.98039	3.93489	4.25994	3.79955	3.73345	3.91774	4.05094	4.01353	4.36512	4.13487	4.24132	4.62166
GRMZM2G119852_P01	4.55436	5.54402	5.05251	4.45568	5.55125	5.08369	5.07958	6.21082	5.74356	4.90959	6.22528	5.45375	4.07309	5.26874	4.86186	4.28883	5.32157	4.97635	4.72883	5.73255	5.28712	4.91004	6.14575	5.54115
GRMZM2G134256_P01	3.61191	4.18383	3.65875	4.70614	4.87359	4.28932	3.35848	3.89098	3.2168	4.31227	5.43999	4.35292	3.80253	4.33236	3.92605	4.13935	4.9424	4.4294	4.31769	4.8203	4.32167	3.75162	4.51654	3.80509
GRMZM2G172101_P03	3.1657	3.35372	3.18197	3.66018	4.04151	3.94001	3.42563	3.49843	3.37367	3.96144	4.41281	4.16973	3.05735	3.3604	3.32786	3.31727	3.59201	3.48902	3.99463	4.03984	3.89355	3.4178	3.70129	3.62419
GRMZM2G027451_P04	3.02733	3.4677	2.66589	3.59352	4.21268	3.25307	3.06979	3.32823	2.69359	4.02087	4.81889	3.67835	2.81711	3.19332	2.447	3.19568	3.79674	2.7551	3.27398	3.69021	2.85922	3.00173	3.49223	2.64778
GRMZM2G033644_P01	4.15887	3.87887	4.36149	4.00142	3.98487	4.31005	4.0539	3.94993	4.27126	3.79636	3.7435	4.2037	4.10191	3.9805	4.40551	4.01403	3.95152	4.23203	4.23292	4.06942	4.3689	4.64059	4.44139	4.84707
GRMZM2G051630_P01	4.58612	4.86976	5.64905	4.56053	4.5592	5.61832	4.21506	4.41857	5.13069	4.56373	5.08656	5.53752	4.24202	4.40588	5.19783	4.26853	4.68225	5.30025	4.36997	4.35021	5.15572	4.19404	4.62756	5.41063
GRMZM2G070542_P02	3.53759	3.65522	3.77096	3.81281	4.03161	4.40081	4.37215	4.57584	4.84023	4.86175	5.12044	5.5236	3.3051	3.69046	3.85085	3.44151	3.70754	4.01801	4.42822	4.60781	4.78865	4.24086	4.61108	4.80688
GRMZM2G133937_P01	2.44378	2.17292	2.54708	2.56068	2.27098	2.57892	2.48413	2.23532	2.5379	2.64751	2.4532	2.84183	2.40049	2.07333	2.57	2.44574	2.17705	2.57739	2.50859	2.28142	2.61484	2.50908	2.33578	2.73203
GRMZM2G146677_P01	3.17779	4.65715	4.67802	3.43746	4.62228	4.89057	2.88098	4.14739	4.33784	2.96871	4.2543	4.44201	3.21397	4.81086	4.94219	3.36157	4.92694	5.01397	2.9399	4.369	4.38101	3.01962	4.21208	4.31438
GRMZM2G396451_P02	2.62667	1.9823	1.79071	3.03064	2.04926	2.01128	2.3826	1.83858	1.82817	2.72696	1.97484	2.01051	2.2071	1.92379	1.89144	2.48212	1.7247	2.01338	2.19201	1.70722	1.80027	2.3519	1.79931	1.65424
GRMZM2G418752_P01	3.9345	3.35653	3.82318	3.88491	3.23707	3.61249	3.9777	3.47598	3.80023	4.09169	3.37407	3.82731	3.78172	3.21446	3.57374	4.0393	3.39061	3.77728	4.15889	3.36192	3.71708	4.13129	3.58936	3.8687
GRMZM2G003157_P01	3.11895	4.62162	4.0413	3.08209	4.47114	4.11969	3.12426	4.49405	4.15434	3.28481	4.79185	4.46169	3.08521	4.46081	4.06771	3.12551	4.44644	3.98685	3.14706	4.31707	4.12134	3.03211	4.39703	4.04708
GRMZM2G024612_P01	0.367567	0.373529	0.711529	0.435235	0.342387	0.872802	0.330098	0.384092	0.656467	0.411372	0.377099	0.75326	0.348455	0.331095	0.78637	0.375414	0.376953	0.791224	0.353026	0.384857	0.698778	0.378833	0.429987	0.729569
GRMZM2G090087_P02	5.42841	4.0192	4.84398	5.67889	4.25411	5.12892	4.98641	3.74487	4.32288	5.12436	3.84583	4.72952	4.6894	3.53369	4.43879	5.03402	3.84865	4.53924	4.49193	3.29677	3.94087	4.56659	3.45687	4.05581
GRMZM2G110952_P03	2.78108	2.3765	2.21553	2.73186	2.5103	2.476	2.56723	2.43884	2.27694	2.97153	2.82106	2.66799	2.37948	2.08708	2.01212	2.48465	2.22663	2.01715	2.50671	2.24965	2.15526	2.57746	2.28994	2.179
GRMZM2G164714_P02	4.14322	3.84277	4.28421	4.23802	3.69215	4.11589	4.02563	3.91965	3.93627	3.81406	3.95475	4.10836	4.03743	3.70634	4.16111	4.10172	3.87825	4.22559	3.7872	4.0273	4.06104	3.85271	3.9788	4.10752
GRMZM2G177077_P01	2.97701	2.85212	3.04074	3.3209	3.25318	3.72262	2.58151	2.54511	2.79447	3.06047	2.88896	3.36431	2.68798	2.53087	2.89867	3.10973	2.99362	3.43285	2.58623	2.42537	2.81856	2.67618	2.51078	2.92778
GRMZM2G180578_P01	3.32512	3.60475	4.22432	4.02022	4.19569	5.20709	3.11301	3.52476	4.09033	3.73357	4.16759	4.82817	3.32807	3.73663	4.52494	3.65313	4.16903	5.18447	3.40983	3.97914	4.60325	3.41705	3.62241	4.33743
GRMZM2G018416_P01	4.04786	3.45373	4.07359	3.79797	3.20107	3.72459	3.90762	3.34239	3.50301	3.60609	3.26745	3.52208	3.63588	3.49727	3.90639	3.62794	3.50405	3.80291	3.70779	3.21535	3.57525	3.66886	3.51868	3.89219
GRMZM2G057000_P03	3.83828	4.07457	3.4615	4.52053	4.73714	4.39552	4.09651	4.39989	4.0195	4.67734	5.0744	4.60239	3.67623	3.79346	3.50763	3.8424	4.07418	3.81299	4.21178	4.36763	4.1535	4.13693	4.47873	4.04696
GRMZM2G103812_P02	4.90078	4.82909	5.12157	4.88398	4.83328	5.38692	3.61763	3.40945	3.72851	3.69128	3.27494	3.88909	4.83702	4.55866	5.20949	4.62596	4.34083	4.81095	3.68683	3.32847	3.86856	3.75652	3.42528	3.98491
GRMZM2G104608_P02	6.05441	5.58407	4.79698	4.67161	4.47166	3.73639	5.01881	4.61502	3.85782	4.31479	4.03934	3.46944	6.31391	6.28109	5.48219	5.71081	5.4695	4.54834	5.07347	4.91076	4.22404	4.8422	4.62856	3.88481
GRMZM2G129451_P02	5.22984	4.81869	4.79287	4.1969	4.01032	3.98815	4.0121	3.97534	3.85856	3.79982	3.64451	3.56492	5.21202	4.93869	5.00982	4.91777	4.5549	4.63027	4.38425	3.9457	4.07357	4.2473	4.11185	4.08182
GRMZM2G146697_P02	3.75806	2.93504	2.69628	3.74275	2.93177	2.76427	3.47813	2.73162	2.50139	3.62929	3.00463	2.67459	3.77373	2.836	2.60204	3.51546	2.86604	2.61275	3.59719	2.84225	2.52762	3.50538	2.85266	2.62105
GRMZM2G171604_P01	3.55716	3.52838	4.82868	3.646	3.77668	5.27893	3.19508	3.113	4.25831	3.48956	3.58159	4.90989	3.50336	3.49468	4.70808	3.65698	3.79442	5.02185	3.5292	3.27688	4.65426	3.42266	3.43438	4.34
GRMZM2G174785_P01	2.40954	2.2673	2.31133	2.36337	2.22224	2.24852	2.45619	2.32499	2.30973	2.51174	2.43279	2.30562	2.17387	2.0602	2.10187	2.12867	2.05951	2.11055	2.41964	2.28155	2.29488	2.53699	2.35142	2.3175
GRMZM2G368902_P01	3.31766	4.14881	4.44976	3.12214	3.79138	4.11065	2.97108	3.96402	4.21612	2.87496	3.67782	3.93264	3.33205	4.31223	4.42573	3.2866	4.1266	4.38523	2.96879	3.92253	4.13068	3.12672	4.05662	4.34918
GRMZM2G005298_P01	3.46806	3.05839	3.34682	3.58335	3.08353	3.51551	3.80443	3.36014	3.55303	3.95065	3.41558	3.84951	3.28002	2.85268	3.21599	3.35981	2.84116	3.40631	3.75593	3.12928	3.43505	3.79775	3.25925	3.67778
GRMZM2G025531_P01	4.44864	4.92759	5.26266	4.0902	4.52414	5.04862	3.83882	4.48809	4.54621	3.53391	4.45356	4.51795	4.30775	4.7579	5.19358	4.43794	4.846	5.33645	3.56517	4.46257	4.54464	3.77758	4.54015	4.54988
GRMZM2G072744_P01	2.86436	4.17341	3.78462	2.37387	3.71959	3.38139	3.33044	4.23177	4.00457	2.67685	3.60939	3.17551	3.20633	4.40726	4.18785	2.69471	3.92609	3.57949	3.54443	4.72519	3.95754	3.30901	4.20729	3.92903
GRMZM2G117531_P04	3.6658	3.0842	2.59794	3.16375	2.6861	2.27792	4.30809	3.72315	3.02456	3.83134	3.13249	2.77629	4.25893	3.58601	3.10767	4.04495	3.37736	2.88051	4.6764	3.9451	3.37783	4.05074	3.46559	2.95728
GRMZM2G129804_P01	2.94141	3.45189	5.17585	2.67135	3.27633	5.08394	3.70945	4.09629	6.64372	3.24272	4.01395	5.71091	2.80065	3.4631	5.49541	2.72726	3.60607	5.26141	3.31181	4.10856	6.12925	3.59535	3.98381	6.49952
GRMZM2G133173_P01	3.9588	3.67714	3.83791	4.06958	3.74511	4.04052	4.07626	3.68408	3.90415	4.31902	4.19388	4.49756	3.68344	3.44471	3.62907	3.74472	3.62159	3.85973	4.05347	3.78202	4.01753	4.09472	3.85146	4.21352
GRMZM2G010823_P01	3.66483	3.60968	3.43818	3.84898	3.77419	3.66948	3.87476	3.75197	3.79926	3.76362	3.84839	3.68204	3.62887	3.73262	3.6011	3.57075	3.67276	3.60599	3.74691	3.86308	3.53133	3.90128	3.74731	3.67262
GRMZM2G015401_P01	5.31278	4.25987	3.91219	4.75902	3.99239	3.70531	4.70076	3.83743	3.43659	4.60486	4.1119	3.62525	4.83739	3.95606	3.64467	4.64198	4.06025	3.53647	4.52597	3.79453	3.47425	4.61723	3.98758	3.66528
GRMZM2G020040_P02	2.88975	3.47171	3.44717	2.8521	3.62145	3.58108	2.99739	3.60078	3.79464	2.93809	3.7329	3.78301	2.81641	3.36805	3.52893	2.62194	3.18444	3.37246	2.89453	3.38058	3.7016	2.9898	3.64008	3.79111
GRMZM2G056500_P01	14.3754	13.5627	13.5429	13.3484	12.9382	13.2581	11.0009	10.7985	9.82852	10.924	10.4363	10.0418	10.9368	10.6736	10.7166	11.6248	11.7005	10.8435	8.05944	7.97191	7.83906	8.73035	8.91827	7.92949
GRMZM2G067985_P05	16.1132	17.0778	15.8822	17.3722	17.0259	17.4578	19.0527	18.4326	17.9302	19.3957	14.5255	17.7781	17.5046	17.6883	16.622	17.9852	14.4201	15.7606	18.2116	16.2737	15.5076	18.3648	15.5562	16.0616
GRMZM2G081541_P01	3.38001	3.74192	3.53353	3.73613	3.87976	3.79316	3.147	2.98555	2.80428	3.22308	3.04033	2.85795	3.64094	3.55565	3.35407	3.82653	3.65886	3.57009	3.39765	3.14672	2.9606	3.64866	2.9912	3.12631
GRMZM2G082664_P01	4.54918	5.44183	4.52635	4.35744	4.8909	4.17329	4.46078	5.36671	4.54808	4.29398	5.24966	4.28374	4.3112	5.09342	4.45121	4.20785	5.20883	4.16062	4.32435	5.32533	4.33624	4.49523	5.42332	4.52047
GRMZM2G119471_P01	3.71265	3.62545	3.83374	3.8687	3.92906	4.10502	3.73879	3.6921	3.96728	4.26666	4.22859	4.39843	3.66151	3.85427	3.7975	3.9792	4.08826	3.99323	3.93739	3.76911	4.01726	3.8351	3.81317	3.88754
GRMZM2G172410_P01	4.06315	4.38287	4.26332	3.54187	3.83556	3.69485	3.10141	3.23581	3.22675	2.88078	3.17897	3.13065	4.08982	4.94384	4.58066	3.8801	4.51419	4.45594	3.28851	3.4253	3.37922	3.15435	3.48347	3.2686
GRMZM2G402002_P01	3.36656	3.94201	3.64649	3.50842	3.83243	3.87379	3.70514	4.00223	3.98113	3.70412	4.26957	4.21697	3.16171	3.72713	3.50536	3.28868	3.82039	3.58632	3.60221	3.99602	3.93916	3.66316	4.41023	4.25077
GRMZM2G012319_P01	3.24487	2.94774	3.45183	3.08086	2.89187	3.60602	2.82338	2.60983	3.18677	2.79498	2.84599	3.39585	2.77879	2.67747	3.38574	2.864	2.72305	3.58399	2.72717	2.60218	3.1763	2.68594	2.70188	3.21349
GRMZM2G038401_P01	2.91372	3.38876	3.08917	3.05951	3.45571	3.12288	2.7433	3.29073	2.96809	2.92346	3.51378	3.14254	2.53909	2.97887	2.83952	2.619	3.14522	2.98213	2.55312	3.01952	2.90505	2.64879	3.20739	2.95062
GRMZM2G045090_P01	2.94639	3.71296	3.14461	2.80717	3.47879	2.94698	3.07184	4.04214	3.47764	2.88955	3.76121	3.14719	2.97854	3.87031	3.39995	2.86917	3.6829	3.23681	3.17518	4.16349	3.83034	3.26216	4.28819	3.81648
GRMZM2G085909_P01	4.90384	4.34933	3.80114	4.63183	4.03768	3.39619	4.38584	3.91894	3.22962	4.18528	3.29136	3.02752	5.44326	4.20272	3.82409	4.53996	3.89536	3.51723	4.87015	3.79077	3.3092	4.03983	3.51384	2.895
GRMZM2G120302_P01	4.04441	4.09745	3.90603	3.81113	3.80174	3.75578	3.73445	3.6498	3.44066	3.5488	3.59629	3.59051	4.23369	4.23264	4.14089	4.02665	4.0664	3.86372	3.82445	3.73108	3.63835	3.77642	3.82461	3.66405
GRMZM2G122843_P01	4.52462	3.95078	4.36804	4.06756	3.63974	4.11087	4.47865	3.9532	4.23354	4.24705	3.95119	4.19148	4.63363	4.30499	5.00069	4.42699	4.09642	4.48196	4.37533	3.99314	4.37067	4.24618	4.11054	4.24274
GRMZM2G159724_P03	6.17164	6.29332	5.56659	6.02812	5.77913	5.22999	6.87921	6.9268	6.00394	6.77282	6.30776	5.87993	7.44828	7.7009	6.36656	6.50654	6.61665	5.8672	7.04351	7.72978	6.66441	7.14989	7.64566	6.42137
GRMZM2G347583_P01	1.17396	1.36987	1.0452	1.13238	1.31573	1.06768	1.40816	1.49161	1.35763	1.33659	1.51108	1.21841	1.14348	1.24039	1.01271	1.14915	1.21225	0.932556	1.26608	1.4132	1.14697	1.3902	1.44587	1.21884
GRMZM2G436001_P02	2.18095	2.19656	1.87957	2.31376	2.31304	2.06284	2.2551	2.2045	1.93377	2.60183	2.79547	2.47245	2.05709	1.98527	1.81829	2.15675	2.17554	1.88263	2.17703	1.99085	1.92611	2.2575	2.33878	2.02434
GRMZM2G574782_P01	4.40737	2.74481	3.75136	4.03348	2.58027	3.56693	5.63623	3.66678	4.93297	5.15035	3.31858	4.52487	4.39865	2.82862	3.88777	4.18469	2.76703	3.61037	5.5578	3.60293	4.84495	5.63144	3.49099	4.88077
AC197672.3_FGP002	20.9848	18.8036	21.7764	23.4631	20.6966	23.7955	23.8677	21.3679	24.0823	26.0698	24.5328	27.8993	18.8585	16.7153	19.9018	20.7783	18.0691	22.2253	22.9594	19.7966	23.64	23.0184	21.0183	23.6794
GRMZM2G157470_P01	4.96546	3.59223	4.56888	4.70142	3.47691	4.0394	5.36944	3.75607	4.62987	4.38131	3.33098	3.68253	4.59224	3.42204	4.31539	4.423	3.23655	3.93212	4.72624	3.67471	3.77553	4.84088	3.5105	4.05627
GRMZM2G180418_P01	4.64988	4.10088	3.04727	4.2125	3.77989	2.83787	4.71703	4.25808	2.99735	4.40554	3.88236	2.91457	3.98914	3.60499	2.79708	4.18125	3.73873	2.72038	4.3272	3.75561	2.73195	4.51745	3.87948	2.95353
GRMZM2G430600_P02	4.1088	3.35293	3.63438	5.28856	4.69221	4.79534	3.43929	2.97961	3.36159	4.49969	4.3367	4.17923	4.19299	3.46328	3.79308	4.41629	3.90122	3.96402	4.34792	4.07164	3.99713	3.70646	3.20241	3.27522
GRMZM2G457621_P01	4.31724	3.91312	4.12941	4.05464	3.76362	3.71789	4.39133	4.09149	4.18024	4.36283	4.05233	4.24937	4.05903	3.59671	3.89438	4.29444	3.61965	3.80573	4.28348	3.90521	3.93057	4.23701	4.05787	4.09241
GRMZM2G589579_P01	3.31716	3.05619	3.13242	3.47419	3.16955	3.39907	2.93467	2.74379	2.8184	3.01566	2.7667	3.03864	2.94029	2.61437	2.94518	2.93401	2.67476	3.04844	2.5849	2.36682	2.7318	2.79912	2.60782	2.88604
GRMZM5G806358_P02	2.18902	2.17121	2.22255	2.46766	2.25368	2.39672	2.26114	2.06737	2.23302	2.53284	2.38332	2.42367	2.01028	1.9149	2.11186	2.04455	1.9001	2.10918	2.20201	2.09338	2.24549	2.2925	2.21604	2.25752
GRMZM2G029258_P01	1.89316	2.26548	1.83456	1.80452	2.30407	1.88604	1.69217	2.22298	1.9172	1.70384	2.27972	1.8811	1.77019	2.2324	1.8433	1.66952	2.2324	1.84558	1.71004	2.20644	1.84804	1.75657	2.25652	1.94418
GRMZM2G098577_P01	4.66434	5.36957	5.14151	5.61767	6.25163	6.13237	5.70657	6.53659	6.0275	6.32885	7.09019	6.55081	4.58285	5.42069	5.25507	5.23754	6.34734	5.89194	5.50146	6.51919	6.15027	5.3607	6.4648	5.85051
GRMZM2G099045_P01	4.2667	3.14191	3.6622	3.73725	2.7283	3.15787	3.94636	2.93861	3.17825	3.72172	2.80382	3.07566	4.13994	3.02242	3.54926	3.80666	2.85704	3.19147	3.68637	2.70727	3.09854	3.69499	2.80063	3.08674
GRMZM2G467799_P03	1.20651	0.905791	1.27436	1.19803	0.881441	1.19753	1.15136	0.875604	1.29928	1.13733	0.94528	1.20992	1.07982	0.819152	1.21083	1.00026	0.798906	1.2843	1.11258	0.900319	1.22877	1.11411	0.873507	1.29502
GRMZM6G477257_P01	4.72309	4.41802	4.32239	3.95936	3.63286	3.72782	4.65676	4.34565	4.39671	4.21236	3.66163	3.83493	4.89555	4.60417	4.53879	4.3507	4.12854	3.94335	4.53784	4.13072	4.13352	4.66434	4.07841	4.10249
GRMZM2G001895_P01	2.30816	2.70855	2.63834	2.2992	2.63655	2.65518	2.19649	2.51835	2.44259	2.17282	2.58927	2.57148	2.28105	2.73219	2.82553	2.34906	2.73407	2.75012	2.131	2.52748	2.52816	2.26221	2.55354	2.5886
GRMZM2G012416_P04	4.2414	4.0499	4.03101	4.38976	4.11926	4.38852	3.61845	3.70223	3.49108	4.23267	4.19195	3.9591	3.97668	4.0553	4.06635	4.24098	4.14834	4.07813	3.74395	3.77741	3.37123	3.55611	3.95561	3.61458
GRMZM2G045070_P01	3.9142	3.56808	3.67201	4.4732	4.05602	4.34852	3.62864	3.28555	3.31037	4.26499	3.88864	4.03034	4.23882	4.04892	4.15886	4.52906	4.16513	4.27708	4.57594	4.06953	4.19495	4.37515	3.91814	4.00787
GRMZM2G049811_P01	4.19373	3.59008	4.24579	4.07202	3.6929	4.40025	4.38516	3.86451	4.52947	4.36299	4.00653	4.6052	3.99827	3.74726	4.48412	4.04985	3.81828	4.38784	4.53911	4.0964	4.73742	4.39886	4.18405	4.60991
GRMZM2G064133_P01	3.46121	3.27708	2.71228	3.81476	3.60899	3.20865	3.65638	3.41812	3.01318	3.87062	4.02136	3.26374	3.3512	3.22497	2.78555	3.50277	3.4406	2.97515	3.60665	3.51616	2.96564	3.73642	3.49271	3.07582
GRMZM2G072315_P01	5.28494	4.97656	5.4361	6.26551	6.17482	6.22899	3.02639	3.12764	2.57446	3.45291	4.69465	2.58123	4.80459	5.11606	5.29348	5.41405	5.94269	5.4772	3.42311	4.22287	2.82345	3.3285	3.74472	2.5851
GRMZM2G074790_P03	4.97511	4.48947	4.92841	5.17725	4.9234	5.5017	3.86969	3.47996	3.76901	3.96782	3.64492	3.95682	4.32452	3.89685	4.52568	4.48594	4.14878	4.55427	3.5861	3.22668	3.31354	3.61358	3.18992	3.45058
GRMZM2G085153_P02	4.42112	3.34395	2.7246	4.28894	3.16	2.53893	4.84282	3.44304	2.85279	4.63287	3.44502	2.79503	4.65849	3.29574	2.78208	4.27905	3.16033	2.51707	4.98983	3.57151	2.93887	4.88688	3.58043	2.85063
GRMZM2G101463_P01	3.12389	3.3388	3.78879	3.65741	3.92753	4.40923	3.11442	3.42554	3.64628	3.764	4.2704	4.50925	3.13885	3.43783	4.05501	3.34072	3.88075	4.19602	3.57435	3.92446	4.30432	3.28636	3.79469	4.09111
GRMZM2G105539_P01	3.51414	3.28504	3.37107	3.54834	3.12977	3.19154	4.56404	4.31688	4.43137	4.57911	3.9343	4.49555	3.88298	3.29081	3.5118	3.74949	3.02828	3.4253	4.59051	3.94967	4.34555	4.57139	4.06524	4.22782
GRMZM2G107654_P01	4.00605	3.55831	3.8698	4.15011	3.99189	4.33543	3.87927	3.58384	3.76632	4.12538	3.79716	4.17672	3.54798	3.36322	3.60878	3.7046	3.60317	3.68502	3.75013	3.46533	3.70058	3.83648	3.63708	3.85735
GRMZM2G122116_P01	2.34765	3.7017	2.97034	2.74466	4.28342	3.57085	2.23218	3.11963	2.60711	2.65319	3.89138	3.25388	2.32151	3.59871	2.95721	2.38614	3.64259	3.07421	2.12407	3.30676	2.76768	2.1906	3.45582	2.79872
GRMZM2G148301_P01	3.20199	2.5339	3.34615	4.09254	3.19649	3.89602	3.43042	2.72193	3.30395	4.06771	3.19411	3.85445	3.2831	2.60098	3.28587	3.68236	2.99288	3.56191	3.54464	2.82307	3.3287	3.69725	2.93663	3.42294
GRMZM2G150030_P01	3.24639	3.79651	3.12945	3.86985	4.72536	4.25329	2.62517	3.06455	2.4782	3.28058	3.98121	3.37152	3.06552	3.76109	3.06948	3.4605	4.21542	3.52364	2.71816	3.18413	2.62188	2.73382	3.27172	2.55254
GRMZM2G162282_P01	7.27076	6.40789	6.06559	6.96409	6.04294	5.87613	9.9785	8.69946	8.24613	8.36083	7.08814	7.17036	9.0265	7.95151	6.94124	8.59556	7.52982	6.88026	8.88116	8.34806	7.32844	8.92258	7.93217	7.49185
GRMZM2G163849_P02	0.912417	0.66716	0.87939	0.902334	0.623692	0.910487	0.881808	0.596338	0.913322	0.901614	0.6426	0.857257	0.824551	0.632399	0.893932	0.797183	0.608943	0.886433	0.885229	0.613621	0.829544	0.894862	0.615246	0.829636
GRMZM2G305115_P01	4.90723	3.51633	3.57215	3.9558	3.0139	3.17703	4.48178	3.5142	3.55312	4.03536	2.92454	3.31678	4.94487	3.72057	3.68117	3.95342	2.97135	3.0113	4.39269	3.19863	3.3713	4.32885	3.14048	3.31715
GRMZM2G355906_P03	1.30527	1.41783	1.83929	1.23126	1.45241	1.97561	0.547798	0.633141	0.746688	0.59954	0.618192	0.743225	1.12507	1.35554	1.6738	1.10988	1.323	1.63863	0.556679	0.57481	0.704405	0.524501	0.62508	0.678343
GRMZM2G094165_P01	37.3396	39.3911	37.9229	29.0667	34.8344	28.0093	25.0784	20.8982	20.112	21.8325	19.1597	17.2302	37.5628	34.362	41.2535	34.0045	37.0135	30.0184	23.0821	22.1525	19.364	23.0335	23.1885	19.0897
GRMZM2G004880_P01	7.09672	5.5192	5.78548	5.52796	4.38476	4.75991	6.3372	5.02411	5.50772	5.25453	4.18148	4.6691	7.33217	5.66237	6.11547	6.46632	5.25417	5.45075	6.50429	4.99133	5.22106	6.48082	4.98258	5.49051
GRMZM2G071630_P01	16.8671	14.8193	11.5646	19.805	16.1174	12.2777	16.2008	13.9733	10.2411	18.4811	16.6358	11.8788	16.2077	13.7915	10.6536	16.7915	15.4698	11.2085	19.3448	15.3857	11.6482	19.3019	16.8071	12.5275
GRMZM2G085000_P03	5.15985	3.95576	4.69389	4.62465	3.52109	5.05543	4.56264	3.33594	3.92167	4.54841	4.40236	4.11484	4.81372	3.38958	4.91377	4.90267	3.67168	4.99009	4.84117	3.89299	4.27177	4.54689	3.83061	4.03853
GRMZM2G120563_P07	14.0077	13.4524	12.4395	12.0542	11.4709	11.3304	12.2376	13.02	12.5167	11.4008	11.0913	11.698	14.4116	13.7359	12.1889	13.2949	12.1037	11.8355	12.6939	11.7847	11.6273	12.8993	12.3411	12.3637
GRMZM2G169372_P01	4.14152	3.2544	3.05981	3.9586	3.58776	3.57202	3.73618	3.0525	2.84409	3.66294	3.56114	3.01697	2.77175	2.65004	2.49711	3.21428	3.11047	2.4607	2.48223	2.28128	2.00937	3.03251	2.5024	2.53994
GRMZM5G871419_P05	3.01348	2.89743	2.70434	2.9719	2.80527	2.50216	2.9814	2.75559	3.03315	3.04615	2.86162	2.70714	2.64103	2.54823	2.73157	2.61994	2.53158	2.6361	2.82072	2.73616	2.78155	2.90537	2.86412	2.90398
GRMZM5G877500_P01	4.3583	3.5575	3.73431	4.51188	3.70204	3.90149	5.02511	4.18911	4.35676	5.29828	4.3572	4.74797	3.62697	3.14359	3.35827	3.86444	3.41824	3.51672	4.66804	3.59584	4.01521	4.64697	4.03648	4.36927
GRMZM2G019926_P03	4.08245	3.49716	3.71315	3.6714	3.12101	3.17425	3.85139	3.38361	3.48613	3.37873	2.93896	2.97148	4.14609	3.67495	3.90932	3.93733	3.34989	3.51699	3.97786	3.46132	3.58899	3.95476	3.5731	3.63968
GRMZM2G021299_P01	0.279669	0.412988	0.489554	0.262671	0.357553	0.47811	0.251232	0.370065	0.476798	0.217398	0.332885	0.44231	0.235819	0.380083	0.556063	0.210899	0.378143	0.60084	0.27795	0.332647	0.521942	0.264363	0.435637	0.434383
GRMZM2G026969_P01	3.79741	4.21739	4.06505	3.6772	4.29348	3.45769	3.9791	3.98302	3.6077	3.54201	4.09129	3.68559	3.90343	4.29696	3.7301	3.78243	4.35392	3.70324	4.07684	4.41349	3.803	4.24159	4.35045	3.94764
GRMZM2G038519_P01	4.6307	3.86725	4.09606	4.97129	4.50739	4.5986	4.72331	4.21028	4.35679	5.6458	4.95266	5.42202	5.44278	4.7446	5.09105	5.10842	4.53095	4.71972	6.49705	5.49817	5.76434	4.98064	4.6887	4.95143
GRMZM2G070360_P01	2.77463	2.92451	3.33859	3.09385	3.15236	3.78765	3.31978	3.84047	3.80342	3.7926	4.60735	4.67662	2.61768	3.07268	3.31589	2.99973	3.20418	3.29066	3.99508	4.57826	4.72865	3.40664	3.62019	4.05853
GRMZM2G098239_P01	3.87734	3.57248	2.82836	4.91979	4.43635	3.91171	4.1365	3.79521	3.16799	5.75848	5.36662	4.53294	3.30478	3.0167	2.53093	3.80799	3.45479	2.97488	4.08187	3.58618	2.9529	4.11325	3.77167	3.1003
GRMZM2G119249_P02	4.23701	4.6846	3.56139	4.37806	4.94507	3.91823	4.39282	4.98587	3.63181	5.04562	5.73169	4.61219	4.19559	5.15762	4.04556	4.55315	5.21218	4.09007	4.62778	5.22309	4.18786	4.56996	5.05988	3.95289
GRMZM5G885392_P01	5.03933	4.78365	4.48176	3.92077	3.80207	3.51867	4.61005	4.29	3.80869	3.85134	3.58607	3.33348	5.55476	5.23526	4.94868	4.87917	4.88449	4.26862	4.67391	4.29047	3.8432	4.47067	4.12799	3.7969
GRMZM2G037698_P02	2.92599	3.4419	3.36436	3.06705	3.45928	3.57051	2.96679	3.47197	3.60838	2.91421	3.34836	3.8233	2.67893	3.3821	3.33316	2.76942	3.22474	3.41204	2.79499	3.23877	3.27846	2.88261	3.43288	3.60978
GRMZM2G121960_P01	1.66354	1.2952	1.34553	1.81888	1.40228	1.35626	1.74298	1.45318	1.35076	1.83507	1.53026	1.3865	1.6831	1.2361	1.34343	1.67214	1.34782	1.41884	2.01318	1.42767	1.54491	1.57111	1.30749	1.25376
GRMZM2G124288_P02	3.04905	3.32468	3.10533	2.92	3.119	3.12285	3.02129	3.59747	3.35092	3.00239	3.60079	3.14419	2.6241	2.97447	3.04131	2.67755	2.86216	2.95626	2.79479	3.17881	3.02092	2.91084	3.34262	3.25822
GRMZM2G365160_P01	4.56319	5.0365	4.5427	6.15623	6.31982	5.91335	4.7669	5.18768	4.61979	6.34679	6.53787	6.13432	3.53762	4.05654	3.59113	4.23417	4.69222	4.10075	4.20178	4.52157	3.97435	4.19333	4.64781	4.12361
GRMZM5G804776_P01	4.63797	4.00511	4.70634	4.58998	4.22832	5.38372	4.49087	3.71818	4.96744	4.44154	4.13967	5.30215	4.13345	3.83612	4.61682	4.4375	3.87965	4.87842	4.12986	3.55433	4.33383	4.13883	3.63863	4.81128
GRMZM5G899366_P01	2.9145	2.97176	3.36972	3.27375	3.50223	3.72763	2.61507	2.7613	2.87772	2.92124	3.38648	3.44299	2.53811	2.86375	3.25076	2.73866	3.04604	3.36502	2.49653	2.67526	2.96308	2.50215	2.79318	3.00308
GRMZM2G026614_P01	3.02887	3.63856	4.11741	3.03038	3.63339	4.06917	3.1283	3.49175	3.96654	2.76866	3.57437	3.72734	2.69461	3.42055	3.93546	2.87111	3.60757	3.88108	2.56828	3.22911	3.63821	2.90979	3.40469	3.66478
GRMZM2G063896_P01	4.04075	3.83959	3.81324	3.88052	3.73355	3.86164	3.79067	3.58454	3.57511	4.79857	4.71115	4.7228	4.00537	3.8899	3.93482	3.67099	3.72503	3.59563	4.19065	3.90809	4.00259	3.62248	3.60815	3.49418
GRMZM2G067225_P01	11.1487	9.49731	10.7282	13.127	12.2491	13.5613	7.08102	6.4113	6.73958	8.00821	7.82231	8.19883	6.79688	6.25705	7.06385	8.35537	7.76693	8.69713	6.22647	5.80913	6.58392	6.25638	6.18685	6.42719
GRMZM2G115646_P01	4.56031	4.69769	3.5333	4.55504	5.12955	3.70638	3.23136	3.51443	2.49097	3.27929	3.67759	2.55535	3.96004	4.35346	3.38731	4.05899	4.63329	3.34264	3.12933	3.42002	2.45685	3.22564	3.57398	2.5272
GRMZM2G123660_P02	2.33073	1.38455	1.64458	2.46276	1.463	1.64733	2.32477	1.25522	1.55113	2.39317	1.5045	1.62211	2.31334	1.25977	1.669	2.31929	1.37366	1.71475	2.39961	1.32099	1.5783	2.45633	1.43832	1.5728
GRMZM2G140667_P01	5.0884	5.95802	6.2384	5.08014	6.05071	6.4065	5.47509	6.24208	6.34776	5.3326	6.34075	6.4165	5.30885	6.45676	6.96454	4.98412	5.83483	6.15654	5.90154	6.60447	6.67083	5.82926	6.51238	6.79894
GRMZM2G143354_P01	3.68745	3.67258	2.95535	4.11535	3.66341	3.2812	4.22891	3.72557	3.68489	4.05597	3.09994	3.12237	3.6559	3.5228	3.48982	3.76909	3.44604	3.05682	3.76983	3.3489	3.19863	3.71751	3.52076	3.21092
GRMZM5G861300_P01	2.53215	2.97791	2.95262	2.70458	3.15905	3.25681	3.13289	3.66209	3.43819	3.39078	3.87909	3.9178	2.48113	3.05174	3.112	2.57413	3.03799	3.0778	3.08991	3.54403	3.58388	3.09443	3.6881	3.6609
GRMZM5G878070_P01	3.05416	3.59989	3.02789	3.06807	3.48155	3.03948	2.93945	3.28537	2.90095	3.11971	3.185	2.99127	3.26997	3.95492	3.41236	3.20597	3.48648	3.21311	3.372	3.67597	3.43128	2.97068	3.33081	2.98364
GRMZM5G897926_P02	1.95698	2.77019	2.67953	2.44214	3.44475	3.31562	1.98578	2.86382	2.69066	2.19423	3.05857	3.12321	1.78698	2.64156	2.49639	2.17747	3.12997	2.94775	1.68344	2.50459	2.33392	1.77298	2.58655	2.4129
GRMZM2G056870_P01	3.4013	3.38244	3.35047	3.75773	3.87304	3.94587	3.25371	3.39238	3.47358	3.69448	4.01018	3.96913	3.50605	3.42838	3.59123	3.56601	3.68894	3.60046	3.41546	3.65534	3.5902	3.40525	3.56929	3.47906
GRMZM2G072861_P01	4.05519	4.19259	4.50167	3.45414	3.93193	4.24972	4.00474	4.36227	4.54057	3.73302	3.7614	4.34742	3.58881	3.95224	4.02491	3.66231	3.99328	4.07511	3.87722	4.01021	4.09366	3.62457	3.79609	4.16694
GRMZM2G143330_P01	3.42531	3.4558	4.04252	3.74687	3.8555	4.84463	4.09702	3.73847	4.59344	4.35399	4.31589	5.27784	3.35118	3.39377	3.71973	3.58273	3.72405	4.4009	3.94454	3.5859	4.34791	4.49836	3.93061	4.77303
GRMZM2G158034_P01	3.42784	2.30001	3.0294	3.86327	2.65649	3.44764	4.03404	2.87214	3.74186	4.67254	3.30848	4.02673	3.29368	2.40067	3.08191	4.01041	2.96491	3.6109	3.82565	2.79994	3.55507	3.87259	2.69737	3.50649
GRMZM2G312365_P01	1.89195	2.09353	1.62467	1.91657	1.93634	1.61868	1.92206	2.02078	1.7782	1.94043	2.02201	1.65677	1.81071	1.92732	1.66609	1.75636	1.97487	1.56878	1.80408	2.02979	1.49974	1.95785	1.99536	1.58707
AC206788.3_FGP015	3.89452	2.45468	3.14873	3.7768	2.43171	3.18979	4.17619	2.7617	3.4876	3.99236	2.55652	3.31264	4.41162	2.85955	3.5713	3.8735	2.55652	3.10988	4.96235	3.19727	4.1404	4.91267	3.18205	4.03966
GRMZM2G009715_P02	3.283	2.72328	2.81802	2.80133	2.35442	2.51873	2.39329	1.97593	2.11181	2.14427	1.73947	1.9774	3.33143	2.83483	2.87383	3.10434	2.56627	2.62267	2.46593	1.8922	2.06226	2.4764	1.9136	2.01527
GRMZM2G021816_P01	2.70114	3.19331	3.75324	2.99154	3.51073	4.23547	2.92797	3.53967	3.96276	3.3265	3.79635	4.6688	2.55444	2.88988	3.57909	2.57943	3.05273	3.65319	2.87256	3.44108	3.99248	3.04642	3.57625	4.15497
GRMZM2G086906_P01	4.21225	4.01356	3.68217	4.5615	4.40243	4.89978	3.87486	3.67093	3.79605	4.79051	4.53759	4.5504	3.62008	3.74404	3.5428	3.78816	3.67805	3.64511	3.75217	3.73733	3.55516	3.40047	3.21607	3.32854
GRMZM2G136453_P01	5.90499	5.27132	4.65383	6.24537	5.26349	5.04781	4.0568	3.56139	3.30461	4.09751	3.54573	3.24759	3.24863	2.89863	2.57368	4.25855	3.79119	3.33732	2.99851	2.72784	2.39001	3.18964	2.94041	2.44516
GRMZM2G151387_P01	2.9399	2.7229	3.22868	2.76012	2.6532	3.20003	3.10643	3.03089	3.68215	2.86326	2.75871	3.30323	2.64401	2.63226	2.99722	2.7532	2.57193	2.96239	2.90014	2.78819	3.11214	3.03296	2.84191	3.51417
GRMZM2G155580_P02	4.6535	4.02725	3.91094	4.31638	3.89971	3.73574	4.38978	4.09185	3.67578	4.22802	3.94723	3.62166	4.43419	4.03725	3.92963	4.32589	3.94181	3.60726	4.29146	3.99891	3.77467	4.36078	4.056	3.74431
GRMZM2G171688_P01	4.09745	4.14465	3.39044	4.31799	4.46081	3.61324	3.70539	3.73256	2.87884	3.78135	3.81244	3.06302	4.22202	4.50603	3.60466	4.20323	4.3712	3.39969	3.86753	3.93839	2.98677	3.80504	4.03392	3.06335
GRMZM2G440208_P01	2.97851	3.0592	2.70394	3.31553	3.42893	3.03965	3.14026	3.00837	2.70531	3.33435	3.4998	3.07017	2.88587	3.11805	2.73555	3.06173	3.34266	2.94019	3.20054	3.20309	2.9124	3.0832	3.33989	2.89278
AC182617.3_FGP001	3.54793	3.58466	4.10009	3.70649	4.04544	4.36058	3.52543	3.77569	3.96383	3.71342	4.57386	4.62748	3.00023	2.98976	3.47692	3.07397	3.64541	3.81034	3.04489	3.6328	3.79672	3.38764	3.75239	3.86405
GRMZM2G020446_P01	3.3187	2.52203	2.65688	3.15557	2.47797	2.81787	3.55333	3.08165	3.12785	3.50257	3.15215	3.2763	3.19037	2.51763	2.62038	3.09939	2.54977	2.53431	3.57695	2.84837	2.95651	3.60313	2.85044	3.0099
GRMZM2G027219_P01	4.08921	4.82911	3.96645	3.60977	4.16737	3.35647	4.00965	4.44694	3.51522	3.4369	4.00254	3.15392	4.28665	5.04742	4.1862	3.81054	4.76979	3.88317	3.85594	4.28066	3.41043	3.90135	4.45618	3.52813
GRMZM2G029055_P01	3.68644	3.82313	3.75654	4.32147	4.58368	4.30987	3.63404	3.8239	3.73688	4.29454	4.8825	4.71769	3.80653	3.98872	3.92586	4.26179	4.48779	4.22899	4.10203	4.27792	4.24675	3.89315	4.13236	4.07742
GRMZM2G052666_P01	3.84827	4.37029	5.19099	3.23103	3.68712	4.37183	4.10484	4.52629	5.65976	3.52878	4.12489	4.651	3.97598	4.46538	5.82789	3.53031	4.11525	4.97259	3.79832	4.33611	5.03125	3.98246	4.37467	5.2947
GRMZM2G098039_P01	3.50252	2.94201	2.30487	3.7211	3.00793	2.43975	3.56734	3.07088	2.38181	3.76282	3.41444	2.56289	3.40288	2.85412	2.42708	3.16568	2.90757	2.337	3.88728	3.29863	2.75477	3.99037	3.50441	2.79183
GRMZM2G110201_P01	2.99713	3.03395	3.47533	3.44264	3.72013	4.37474	3.63711	3.37881	4.37438	3.88191	3.78875	4.80388	2.55726	2.76036	3.33514	2.79521	2.89553	3.58905	3.26277	3.17619	3.90769	3.42597	3.24628	4.13978
GRMZM2G127139_P01	3.25073	3.24765	3.46782	2.95438	2.92667	3.18669	3.27513	3.1755	3.45216	3.13005	3.06257	3.37353	3.41533	3.51557	3.78061	3.19576	3.3114	3.3871	3.50089	3.35896	3.69223	3.27773	3.40167	3.65987
GRMZM2G138987_P02	1.953	2.15607	1.63084	2.11536	2.16932	1.79514	2.0291	2.22214	1.96356	2.24095	2.37602	1.96818	1.79025	1.9475	1.53918	1.95535	1.997	1.59401	1.86204	1.98872	1.71376	2.05394	2.14323	1.79532
GRMZM2G179792_P05	2.76192	3.17832	2.58857	2.60757	3.26309	2.60565	2.36654	2.69201	2.07608	2.26981	2.92271	2.20265	2.64045	3.03434	2.5368	2.49535	3.18609	2.46329	2.43203	2.7852	2.26684	2.42633	2.93824	2.26011
GRMZM2G039711_P01	3.3921	3.70055	4.19299	3.75408	4.1397	4.84382	3.3226	3.75206	4.4784	4.02329	4.21283	5.26286	3.51658	3.58959	4.2704	3.65591	3.79782	4.58478	3.72271	4.00712	4.84468	3.61273	3.80034	4.52208
GRMZM2G050514_P03	5.94365	6.7305	6.13054	5.22497	5.69555	5.49654	5.01614	5.70628	5.29815	4.6533	5.28734	5.22852	6.66466	8.08853	7.41087	6.19099	7.60725	6.45833	5.72315	6.47377	5.96295	5.58315	6.41077	6.01409
GRMZM2G072865_P01	3.0448	3.15908	2.73428	2.5798	2.75858	2.17372	2.91401	2.84701	2.42893	2.54502	2.7871	2.23985	3.11927	3.23245	2.77241	3.0371	3.29941	2.65668	2.95124	2.90244	2.50333	2.80876	3.01394	2.4908
GRMZM2G114739_P01	1.98182	2.35794	3.16014	1.80711	2.17991	2.86356	3.48741	4.08413	5.23784	3.0893	3.61809	4.73376	1.98122	2.39539	3.31568	1.75603	2.30152	3.20674	3.39916	3.98718	5.17581	3.49795	4.07584	5.30647
GRMZM2G134439_P01	3.2582	2.79219	2.90683	3.51386	2.95855	3.32849	3.97178	3.03795	3.26718	4.12271	3.19918	3.59138	3.24451	2.73143	2.84176	3.36019	2.73278	3.02887	3.63638	2.69119	2.99764	3.89238	2.85674	3.03784
GRMZM2G137236_P01	3.77653	2.5861	2.30624	4.00726	2.72769	2.39612	3.54322	2.46319	2.38976	3.81271	2.76918	2.49188	3.63035	2.55991	2.30742	3.78502	2.64341	2.31047	3.74183	2.57806	2.41588	3.70307	2.67245	2.38223
GRMZM2G162755_P01	4.1303	5.01662	5.55098	4.1901	5.38107	5.96118	2.5501	3.12753	3.56025	2.57228	3.30852	3.85458	2.70337	3.40723	3.95713	3.38495	4.10025	4.72016	2.20396	2.70824	3.08575	2.26495	2.95054	3.30997
GRMZM2G008623_P01	4.75219	3.50297	3.34335	4.14603	3.59351	4.06438	4.15817	3.81546	3.94702	4.14036	4.18856	4.43373	3.42494	3.26094	3.72251	3.65074	3.21549	3.31705	3.71427	3.50508	4.21079	4.0133	3.91799	3.96115
GRMZM2G014376_P03	3.58243	3.29078	3.23221	3.83521	3.4961	3.62141	2.94732	2.70023	2.67114	3.00911	2.8151	2.69778	3.4111	3.12573	3.21239	3.6042	3.45781	3.32999	2.76371	2.57347	2.59772	2.84692	2.54079	2.63736
GRMZM2G030606_P01	4.19226	4.27473	3.95008	4.29836	4.41027	4.03265	2.81891	3.41706	2.66877	3.16075	3.70705	2.83318	4.44954	4.68706	4.38652	4.53889	4.89917	4.36993	3.47627	3.89584	2.93528	3.06502	3.70881	2.82359
GRMZM2G031053_P01	1.93927	1.45496	1.83439	2.2232	1.59545	1.9365	2.26036	1.64653	1.98023	2.25881	1.73594	2.08867	1.99521	1.54258	1.99578	1.98805	1.53025	1.81071	2.12198	1.74648	2.19295	2.21313	1.74782	2.16078
GRMZM2G039588_P03	2.97846	4.20334	3.86256	2.97877	4.11309	3.64881	2.96206	4.07428	3.595	2.94929	4.0106	3.59992	3.06628	4.24299	4.00126	2.96449	4.30879	3.78714	3.08603	3.89123	3.71513	3.01462	4.15568	3.79017
GRMZM2G044128_P01	2.59156	2.23675	1.98069	2.6852	2.39044	2.03565	4.44569	3.71809	4.17331	5.16454	4.02169	4.81595	2.53898	2.07569	2.10249	2.77571	2.2277	2.20934	4.68531	3.54482	4.10736	5.11301	3.78483	4.57521
GRMZM2G057402_P03	0.096543	0.381911	0.358832	0.0937448	0.369711	0.292362	0.11175	0.403244	0.415501	0.12325	0.370205	0.372661	0.124348	0.363787	0.376653	0.155753	0.321086	0.346073	0.150039	0.401869	0.416749	0.144572	0.388188	0.421168
GRMZM2G070807_P01	2.34906	2.45932	2.24898	2.35506	2.314	2.19267	2.09021	2.15036	2.00825	2.22732	2.22076	2.06635	1.90917	1.9627	1.8918	1.99897	2.04309	1.88821	1.97664	1.87565	1.77671	2.09357	1.97412	1.92703
GRMZM2G082581_P01	4.28967	4.19615	4.56999	4.40372	4.51195	4.64573	4.24001	4.36512	4.31274	4.65118	4.76215	4.8734	4.21518	4.33732	4.5431	4.29514	4.60273	4.5906	4.51314	4.70177	4.7869	4.39194	4.52281	4.67755
GRMZM2G100225_P01	4.30505	3.27523	3.21825	5.95743	4.6468	4.41609	3.54186	3.06267	2.68055	5.30576	4.42816	3.80226	4.07562	3.2172	3.17257	4.57491	3.78337	3.41049	4.77455	3.6862	3.56054	3.46481	2.90037	2.73924
GRMZM2G109560_P01	2.84456	2.79254	2.67787	2.85872	2.88611	2.77198	3.07276	3.15034	2.97891	3.21971	3.08247	3.09173	2.82843	2.90594	2.77008	2.83805	2.71797	2.76004	3.11636	3.13302	2.8349	3.2214	3.33161	3.11451
GRMZM2G136296_P01	11.2302	10.8121	10.2224	11.6047	11.8838	11.383	11.7028	11.4186	11.7777	13.4994	13.2306	13.2462	10.3408	10.636	9.69465	10.9137	10.786	10.5785	11.734	11.0849	11.2532	12.9745	12.148	11.8443
GRMZM2G138230_P02	3.32161	3.36455	3.65038	3.16504	3.29099	3.53975	3.06776	3.21028	3.29403	3.07071	3.23617	3.40174	3.2109	3.30836	3.69565	3.02944	3.26647	3.60146	3.0563	3.11459	3.39553	3.07824	3.20858	3.42146
GRMZM2G141258_P01	0.400324	0.864616	0.620963	0.437826	0.786389	0.614199	0.325122	0.685477	0.573681	0.333254	0.781787	0.577992	0.37352	0.758618	0.651202	0.35394	0.683378	0.706508	0.389902	0.663437	0.647223	0.386112	0.776298	0.608231
GRMZM2G392649_P01	2.75685	1.7786	2.57378	2.76351	1.6877	2.56932	2.52753	1.5694	2.34035	2.57467	1.54455	2.44039	2.64843	1.67153	2.65256	2.65453	1.69247	2.60004	2.51283	1.50574	2.43987	2.56164	1.55	2.38368
GRMZM2G450937_P07	2.43609	1.70572	2.3513	2.66257	1.96713	2.67733	2.73626	2.03514	2.71481	3.39328	2.30839	3.16661	1.85228	1.58261	2.03417	2.01736	1.59127	2.10397	2.33312	1.77955	2.33374	2.56905	2.03019	2.61807
GRMZM2G463032_P01	2.78875	2.91361	2.177	2.98894	3.16755	2.28371	2.33257	2.44387	2.01848	2.55765	2.60896	2.05383	2.7707	2.78894	2.2179	2.94354	2.96893	2.31684	2.25983	2.45648	1.90332	2.35801	2.65166	2.02893
AC189750.4_FGP004	2.99769	2.42136	2.55363	2.96991	2.41348	2.62963	3.94965	2.96764	3.09404	2.98669	2.82664	2.54109	3.68084	3.02375	3.37218	3.66898	3.19427	3.17925	4.69792	3.8289	4.07993	4.04832	3.32396	3.55026
GRMZM2G056645_P01	0.231367	0.262597	0.260648	0.255541	0.248215	0.286268	0.245199	0.254997	0.235972	0.280018	0.279306	0.233587	0.269094	0.230144	0.258362	0.251065	0.239501	0.23965	0.219736	0.253982	0.227151	0.24798	0.231258	0.258362
GRMZM2G082529_P01	2.43631	2.56903	2.66415	2.71462	2.77381	2.80545	2.55902	2.66565	2.80837	2.73843	2.71153	2.97788	2.25249	2.55161	2.60109	2.37422	2.53853	2.64952	2.40588	2.537	2.72349	2.51902	2.65284	2.77006
GRMZM2G088565_P01	4.38114	4.06312	4.30503	4.62694	4.30144	4.87225	4.44214	4.11449	4.49996	4.9128	3.77921	5.17166	4.27691	3.66642	3.98147	4.41392	3.70543	4.1685	3.84403	3.12372	3.92352	4.10212	3.24617	4.07762
GRMZM2G097043_P01	3.63138	2.41058	1.89014	3.6205	2.33811	2.10704	3.58364	2.4089	2.16968	3.63384	2.52035	2.07059	3.29472	2.18719	1.88148	3.3895	2.29793	1.91008	3.36352	2.32711	1.95257	3.48289	2.50983	2.01843
GRMZM2G109244_P01	3.73571	3.26858	4.16449	3.84944	3.72703	4.429	3.9526	3.45424	4.33948	3.83641	4.11667	4.40226	4.33145	4.21175	5.35417	4.22336	4.29956	4.9807	4.40856	4.38703	5.13381	3.66247	3.53514	4.19609
GRMZM2G153541_P06	26.6696	26.378	25.6482	26.0787	28.0296	29.1937	30.4056	31.0321	31.7601	31.3494	28.304	33.1341	24.3715	26.196	24.7111	25.5977	25.9295	23.4766	26.85	26.7052	26.1746	28.6775	27.4255	28.9016
GRMZM2G170400_P01	3.61159	2.85325	3.39276	2.76403	2.10516	2.51624	3.40079	2.52993	2.93606	3.12228	2.48431	2.92659	3.94216	3.22503	3.841	4.00333	3.27859	3.77436	3.98148	2.99947	3.63566	3.17434	2.52426	2.97733
GRMZM2G332809_P01	1.62167	2.34272	1.80283	1.72442	2.83616	2.53966	2.4146	3.18983	2.8904	2.42985	3.29881	2.9893	1.69718	2.39035	2.08439	1.59784	2.59797	2.55618	2.27618	3.32061	2.55774	2.23828	3.02355	2.5795
GRMZM2G435338_P01	2.08531	3.06878	2.47746	2.17459	3.20222	2.73657	2.12337	3.20852	2.3645	2.27623	3.65069	2.84086	1.70226	2.8617	2.26268	1.89783	3.00364	2.48291	1.85147	2.9473	2.39348	1.88893	3.05714	2.44154
GRMZM5G832672_P02	2.12135	3.06235	3.30455	2.03627	2.96538	3.12727	2.28622	3.16923	3.08646	2.25793	3.05677	3.13747	2.01461	2.87244	3.03608	1.98699	2.77702	3.02524	2.12135	2.98985	3.17064	2.17528	3.10696	3.11229
GRMZM2G016655_P01	3.89389	3.91159	3.36751	4.11974	4.26702	3.67274	3.85592	3.19154	3.10167	4.05515	3.5187	3.49186	3.73693	3.85614	3.44596	3.84026	3.85541	3.47747	3.5553	3.08175	3.12839	3.94281	3.31785	3.31441
GRMZM2G029559_P02	9.27614	7.71186	7.84171	10.3291	9.06115	9.34967	9.73882	9.12728	9.02426	11.2423	11.9517	11.9244	9.61555	8.09414	8.90349	10.1477	9.25713	9.07793	11.2275	10.8943	11.4137	10.4229	10.9024	11.4648
GRMZM2G047695_P01	4.16435	3.37938	4.1631	4.1237	3.17643	4.15336	4.15038	3.38677	4.24147	4.40742	3.12464	4.47405	4.27784	3.25072	4.28553	4.34348	3.4913	4.35077	4.18595	3.14426	4.18301	4.34687	3.04649	4.1487
GRMZM2G058760_P01	3.49014	2.98983	3.421	3.65315	2.97607	3.50527	2.98207	2.42058	2.85437	3.08333	2.62429	2.91538	3.19977	2.87885	3.30841	3.55436	3.15704	3.42437	2.93691	2.37302	2.731	3.10027	2.58032	2.84021
GRMZM2G081175_P01	3.46883	2.9646	2.82502	3.32089	2.75534	2.6126	3.6589	3.12648	2.81732	3.46918	3.03202	2.71524	3.75985	3.22428	3.0501	3.54994	3.11737	2.72652	3.89526	3.33331	3.05588	3.87716	3.4466	3.19731
GRMZM2G081652_P01	4.03909	4.00208	3.84382	3.93746	4.19019	3.65267	3.94342	4.11371	3.72988	3.87196	3.94668	3.72648	4.47897	4.53955	4.15041	4.35749	4.4734	4.16177	4.78109	4.98234	4.3972	4.59053	4.75206	4.33778
GRMZM2G116273_P01	2.97015	3.25327	3.51054	3.45626	3.81601	4.51196	3.11309	3.39309	3.72814	3.56412	3.88702	4.90572	2.9798	3.23568	3.80697	3.04469	3.24981	3.67226	3.61615	3.76825	4.49716	3.25574	3.39686	4.36726
GRMZM2G157334_P03	3.82635	3.77236	3.50011	4.41269	3.91003	3.08994	4.17815	4.01889	3.89604	4.25075	4.26729	3.52178	4.10556	3.80005	3.76598	3.87461	3.76862	3.55226	4.64124	4.23138	3.70942	4.71064	4.23138	3.96446
GRMZM2G161295_P01	4.07355	4.33539	4.82968	3.06474	3.28603	3.62567	4.42897	4.61437	4.74844	3.61841	4.02997	4.33737	4.04483	4.38034	5.06319	3.52786	4.18466	4.36072	4.32486	4.61481	5.06222	3.91678	4.55443	4.97271
GRMZM2G422651_P01	3.11766	2.91895	2.72566	3.49279	3.26515	3.00448	3.56776	3.22319	3.036	3.7662	3.53301	3.17258	3.26633	3.11317	2.82965	3.47894	3.17243	2.95222	3.65438	3.44353	3.18928	3.65595	3.33057	3.09014
GRMZM2G587327_P01	4.04962	3.43438	3.41941	4.37258	3.61176	3.66974	4.02611	3.10766	3.19735	4.25049	3.46548	3.45609	4.03065	3.47163	3.27608	4.13418	3.42515	3.44465	3.99229	3.20369	3.18423	4.14408	3.28025	3.35246
GRMZM2G001297_P01	2.16756	2.33497	2.56014	2.36449	2.25305	2.72965	2.3213	2.33963	2.58395	2.39448	2.29901	2.66624	2.1096	2.0648	2.45922	2.16891	2.17535	2.57231	2.24701	2.17247	2.70247	2.22664	2.36072	2.72602
GRMZM2G044132_P01	5.4688	5.33174	5.46317	5.03211	5.14122	5.82014	1.9685	1.88176	2.0011	1.75354	1.93238	1.97076	4.18481	4.56369	4.74814	4.12481	4.57076	4.44193	1.6398	1.75928	1.79034	1.82763	1.81916	1.76441
GRMZM2G047274_P01	4.06361	3.90801	3.38479	4.07755	3.69185	3.37422	4.79738	4.6772	4.19766	4.41287	4.06519	3.62483	4.15051	3.94566	3.48844	4.22922	4.08653	3.41854	4.52683	4.37565	3.62006	4.74204	4.24991	3.89147
GRMZM2G055025_P01	4.18309	2.97931	3.7774	3.95185	2.6238	3.67004	3.75462	2.3825	3.31313	3.36058	2.24785	3.09682	4.02199	2.73241	4.05299	3.9544	2.50203	3.64641	3.41712	2.38278	3.06999	3.35633	2.14932	3.37322
GRMZM2G067908_P01	2.3251	3.34094	2.39762	2.10372	3.0553	2.25069	2.41388	3.67714	2.53441	2.2756	3.39016	2.39859	2.47814	3.58573	2.61972	2.26402	3.30511	2.4607	2.5449	3.7699	2.62431	2.59462	3.87572	2.71397
GRMZM2G071268_P01	3.31877	4.07065	3.91439	2.94612	3.75311	3.29409	3.70269	4.3685	3.95574	3.39761	4.39029	3.92664	3.3784	4.32033	4.13724	3.1071	4.18166	3.67661	3.54038	4.36976	4.04305	3.60894	4.54571	4.05224
GRMZM2G093405_P02	4.9223	4.12962	3.84498	5.05127	4.06893	3.93997	4.43802	3.61442	3.30761	4.50276	3.58629	3.44718	4.86794	3.90457	3.84304	4.78739	3.96766	4.08885	4.29422	3.3102	3.3111	4.13609	3.41831	3.21727
GRMZM2G109121_P02	2.53199	2.99099	2.50284	2.5602	3.23068	2.73581	2.66815	3.25513	2.67442	2.80651	3.66297	2.98239	2.46526	3.0254	2.62279	2.50844	3.14615	2.68957	2.7388	3.25996	2.87554	2.72065	3.42871	2.91664
GRMZM2G126120_P01	2.41415	3.18108	3.12277	2.41318	3.06125	3.09537	2.65421	3.368	3.40692	2.6564	3.42791	3.33226	2.30741	2.92457	3.05473	2.35298	2.99728	3.20405	2.47947	3.4226	3.38644	2.7222	3.61733	3.39747
GRMZM2G127632_P01	2.34917	2.3842	2.30299	2.31413	2.30706	2.18252	2.44999	2.34396	2.29544	2.26336	2.2323	2.10396	2.37777	2.44967	2.33437	2.31723	2.44348	2.25283	2.40041	2.37991	2.2423	2.52793	2.45943	2.28559
GRMZM2G131943_P03	1.80813	2.10638	1.68465	2.24879	2.68828	2.1715	2.56146	3.01362	2.62143	3.20954	3.98537	3.32169	1.56575	1.87409	1.51817	1.71493	2.05741	1.64635	2.27532	3.06791	2.37697	2.61607	3.20694	2.65922
GRMZM2G181192_P01	5.47248	5.23227	6.28865	5.50926	5.53905	6.59749	1.53562	1.44686	1.93253	1.48978	1.46438	1.97776	4.66816	4.9292	5.55207	4.53437	4.75671	5.21739	1.41622	1.32054	1.72125	1.37412	1.31099	1.71285
GRMZM2G304362_P01	2.48426	2.02357	2.31848	3.11618	2.73768	3.12644	2.55895	2.08068	2.36645	3.26483	2.96199	3.08077	2.12106	1.76677	2.04608	2.43617	2.24664	2.39944	2.44764	2.02626	2.28642	2.57091	2.15642	2.37591
GRMZM2G372632_P01	2.42084	1.8107	2.2259	2.57703	1.81035	2.43322	2.34019	1.72184	2.25652	2.57679	1.90417	2.48812	2.20081	1.65693	2.15467	2.4474	1.80698	2.31935	2.21055	1.63884	2.02924	2.22639	1.65019	2.09298
GRMZM2G403636_P01	4.68992	4.93246	3.78952	4.70864	4.91115	3.97196	4.84932	5.14759	4.0308	4.74153	5.2725	4.28354	4.3099	4.72775	3.74923	4.48986	4.70098	3.64774	4.47296	4.91859	4.21601	4.73787	5.38898	4.31119
GRMZM5G825524_P01	2.79356	2.29572	2.37283	3.26243	2.63258	2.70994	2.45942	2.37885	2.6494	2.99107	2.61868	2.76928	3.00724	2.5722	2.33336	3.33357	3.04467	2.87801	3.2697	2.65294	2.68863	2.88302	2.80436	2.59854
GRMZM2G000823_P01	2.95175	2.65409	1.78575	3.29057	2.81728	1.80551	2.63681	2.38884	1.63113	2.83712	2.55465	1.57237	3.15683	2.6924	1.96624	3.18489	2.82358	1.86638	3.00638	2.50533	1.70879	2.93563	2.56384	1.66384
GRMZM2G005036_P01	4.54237	4.12857	4.36516	4.72732	4.04377	4.40949	4.324	3.63025	4.21513	4.45483	3.52794	4.30739	3.81198	3.4373	3.75698	4.07411	3.35483	3.97911	3.84398	3.31788	3.89761	4.22141	3.55945	4.06913
GRMZM2G031028_P02	2.94394	3.19613	3.51318	2.44836	2.70126	3.04777	3.87539	4.18142	4.45495	3.27365	3.54251	3.91926	3.59507	3.6926	4.32111	2.87741	3.09767	3.26529	4.65129	4.81109	5.18519	4.3349	4.77731	5.29325
GRMZM2G031721_P01	3.60331	4.33331	4.20485	3.108	3.54547	3.63225	2.73476	3.27281	3.36814	2.43974	2.96999	3.04131	3.67207	4.47856	4.35973	3.31111	3.95022	3.9322	2.53376	3.14242	3.14115	2.59725	3.30721	3.32036
GRMZM2G039455_P01	1.55079	1.37674	1.22992	1.51178	1.38059	1.22854	1.54244	1.39172	1.3007	1.63276	1.46418	1.34915	1.38079	1.21765	1.15158	1.40477	1.34841	1.21945	1.51178	1.34442	1.25642	1.46488	1.47628	1.26424
GRMZM2G060045_P01	2.61154	1.58539	1.72786	2.71635	1.79855	1.93464	2.27721	1.56392	1.53278	2.58675	1.76849	1.71836	2.18492	1.51531	1.53601	2.25733	1.64585	1.61675	2.23916	1.51153	1.42456	2.12674	1.61098	1.50904
GRMZM2G077406_P01	2.96933	3.03795	2.74572	3.2177	3.51962	2.94524	2.99343	3.10868	2.65859	3.01371	3.23178	2.82037	3.16303	3.26087	3.01147	3.22622	3.35947	2.93927	3.22299	3.19075	2.92162	3.1936	3.29088	2.95772
GRMZM2G083173_P01	3.02864	3.24341	3.31287	2.80862	2.78938	3.0383	3.42713	3.48633	3.79202	3.21152	3.10309	3.44747	3.28423	3.13801	3.51745	3.22568	3.13022	3.24088	3.46868	3.45827	3.76624	3.54548	3.65129	3.88477
GRMZM2G153181_P01	3.23203	2.89872	2.62863	3.7086	3.39553	3.26059	3.45637	2.97803	2.78404	4.43018	3.56945	3.63525	3.0946	2.84519	2.58788	3.50065	2.99729	2.92668	3.77649	3.25533	3.15762	3.80109	3.06046	3.01932
GRMZM2G155962_P03	3.68247	4.00418	4.05891	3.64259	3.98968	4.12582	3.76587	4.13059	4.25389	3.61394	3.88018	4.22598	3.60125	4.12334	4.11186	3.55375	3.9144	3.94274	3.56753	3.9921	4.18411	3.57261	3.96553	4.09668
GRMZM2G174481_P01	3.34866	2.91899	3.47968	3.33637	3.04266	3.47376	3.09288	2.64903	2.98557	3.14736	2.87786	3.28573	3.29252	2.93045	3.60678	3.31378	3.01299	3.52216	3.31643	2.80149	3.41631	3.15201	2.76653	3.23001
GRMZM2G176903_P01	3.75636	3.85744	3.90862	4.27009	4.08692	4.3832	3.38491	3.23216	3.5706	3.2155	3.32523	3.42375	3.64929	3.58722	3.94662	3.68192	3.75728	4.0998	3.03435	3.02174	3.24208	3.00758	3.132	3.42534
GRMZM2G438524_P01	3.07973	2.59514	2.61322	3.61735	3.09999	3.11009	3.3747	2.90965	2.90212	3.98785	3.69227	3.65783	2.79307	2.47779	2.54284	2.97892	2.74951	2.7582	3.05623	2.64922	2.6127	3.11214	2.82643	2.80301
GRMZM2G480809_P01	0.91591	1.32161	1.02366	0.850984	1.21714	0.963282	0.882533	1.24989	1.03926	0.898901	1.35748	1.00137	0.84248	1.17686	1.02115	0.842023	1.13541	0.903528	0.886556	1.21883	1.02304	0.880612	1.32278	1.02471
GRMZM5G824600_P03	5.08619	3.59343	5.215	4.84418	3.57682	5.18722	4.75037	3.60229	5.07664	4.74239	3.46682	4.96607	4.74738	3.55541	5.14163	4.56675	3.55025	4.96764	4.61116	3.1874	4.60498	4.65157	3.46756	4.84081
GRMZM2G015285_P01	3.79819	3.63964	3.76255	3.27499	3.18409	3.44232	4.79204	4.63782	4.98569	3.7956	3.97433	4.08591	4.08199	3.92914	4.39239	3.63427	3.68116	3.80655	4.93265	4.9725	5.17625	4.69029	4.98132	5.34835
GRMZM2G034083_P01	3.2364	3.82427	3.87349	3.42774	4.29771	4.25039	3.08111	3.84342	3.90284	3.48942	4.42555	4.33688	3.18105	3.74256	3.73846	3.16113	3.82231	4.00812	3.24873	3.95289	3.93611	3.17441	4.09129	3.95372
GRMZM2G046587_P02	2.38822	3.0637	2.79722	2.36165	3.02118	3.08104	2.60365	3.0203	3.07602	2.40744	2.98681	2.98869	2.7797	3.55674	3.59204	2.66771	3.19883	3.35719	2.49665	3.23465	3.16601	2.29498	2.91779	2.94178
GRMZM2G049141_P01	2.22781	2.01963	1.91166	2.38522	1.80617	1.96678	2.42097	2.03721	2.01842	2.35406	2.0233	1.93274	2.37262	2.01538	2.0219	2.24569	1.91995	1.95711	2.44503	2.0631	2.08225	2.54859	2.11525	2.10913
GRMZM2G053781_P01	2.38246	3.02562	2.82079	2.5056	3.29659	3.04804	2.33283	3.06472	2.74095	2.53135	3.44347	3.08995	2.25792	3.0053	2.79855	2.17364	2.99021	2.71985	2.4232	2.99175	2.87725	2.393	3.18235	2.90462
GRMZM2G068715_P01	3.00951	3.89327	3.97902	3.80466	4.39694	4.47514	2.99667	3.30412	3.24323	3.58188	4.37202	3.79004	2.53473	3.23168	3.33418	2.9437	3.72576	3.50676	2.47695	2.97946	2.6994	2.6519	3.09675	2.97224
GRMZM2G079256_P01	3.68628	3.62579	4.30894	3.46522	3.58391	4.13971	3.66276	3.91552	4.04149	3.92759	3.954	4.30342	3.23151	3.40472	4.14737	3.43918	3.62277	4.10953	3.61428	3.85969	4.31532	3.97318	4.0336	4.63422
GRMZM2G117786_P01	2.97708	3.46819	3.37112	3.11156	3.64466	3.25089	3.01972	3.7617	3.24184	3.13034	3.76061	3.23861	2.66726	3.40803	3.12128	2.92102	3.58596	3.13033	2.93921	3.53667	3.23505	3.23381	3.83417	3.41088
GRMZM2G150616_P01	4.10342	3.95056	4.13612	3.78334	3.73518	3.79012	4.46011	4.17876	4.86928	3.91335	3.67513	3.90178	4.13798	4.01742	4.20825	3.79116	3.74559	3.69231	3.91211	3.97859	3.60835	3.89854	3.71877	3.79379
GRMZM2G341621_P01	2.05205	2.93969	2.5925	2.58782	3.51202	3.22726	2.28931	2.89435	2.77341	2.73571	3.71919	3.41588	1.94108	2.55997	2.66247	2.16533	2.84023	2.99235	2.12127	2.60475	2.64651	2.10743	2.9298	2.68961
GRMZM2G375593_P01	2.21367	1.86313	1.58608	2.2088	1.8128	1.53657	2.32399	1.78389	1.65485	2.3107	1.99818	1.6453	2.05993	1.74894	1.50982	2.11864	1.79249	1.49502	2.42788	1.92809	1.75005	2.33639	2.07248	1.82232
GRMZM2G018947_P01	2.99129	3.16496	2.75774	3.25362	3.38884	2.93411	2.91441	3.27062	2.62241	3.11812	3.46776	2.88628	2.82677	2.98199	2.70394	2.77023	3.24581	2.64904	3.09449	3.17559	2.75747	3.03107	3.30444	2.68899
GRMZM2G025214_P02	2.22292	2.74137	2.47797	2.4291	3.1229	2.68192	2.39438	2.67365	2.39883	2.59352	3.00319	2.73835	2.23253	2.555	2.39931	2.30408	2.64512	2.49304	2.39016	2.59633	2.36393	2.43332	2.66245	2.44665
GRMZM2G033478_P02	1.38235	0.98384	1.48967	1.35917	0.961865	1.44583	1.39642	1.06313	1.66444	1.43699	1.0854	1.52697	1.32922	0.94771	1.45237	1.32039	0.902868	1.42369	1.37586	1.04036	1.50364	1.3996	1.01482	1.49339
GRMZM2G036534_P01	3.80128	4.8295	4.67218	3.93096	4.88309	5.01806	4.05172	5.05857	5.22418	4.14801	5.00545	5.22652	3.74226	4.46336	4.39547	3.78536	4.69149	4.72453	3.62228	4.553	4.30153	3.91815	4.51553	4.43754
GRMZM2G060156_P01	2.99661	1.98657	3.21158	3.30915	2.15433	3.43716	4.08077	2.73015	4.1943	4.17795	3.01857	4.35605	2.57165	1.68237	2.77201	2.8775	2.01053	3.0611	3.96349	2.67238	3.90646	4.02289	2.7451	4.06133
GRMZM2G060824_P01	2.11793	1.44522	1.73634	2.33174	1.57536	2.01393	2.05568	1.49822	1.89636	2.32682	1.57479	2.05566	1.93117	1.4162	1.76337	1.95636	1.48443	1.82288	2.13575	1.40729	1.7465	2.14456	1.59849	1.96495
GRMZM2G073584_P02	3.27004	4.30715	4.04208	3.01569	4.03289	3.80061	2.87905	3.73146	3.4894	2.69141	3.59433	3.36161	2.86943	3.98382	3.7607	2.90343	4.09861	3.67927	2.60385	3.61843	3.3467	2.76711	3.63332	3.51963
GRMZM2G086887_P01	2.57678	2.40646	2.15524	2.6631	2.45296	2.15762	2.52401	2.42802	2.11897	2.55987	2.43165	2.12961	2.39492	2.26088	2.05492	2.36623	2.21753	2.13678	2.40388	2.35753	2.11441	2.51121	2.44497	2.13244
GRMZM2G093643_P01	3.92305	3.91038	3.70124	3.48445	3.46369	3.33791	3.31978	3.26174	2.97198	2.99003	2.78652	2.81091	4.13078	3.94816	3.95027	3.76834	3.73772	3.53201	3.2508	2.91872	2.8792	3.13278	2.97306	2.81648
GRMZM2G096962_P02	3.76651	3.44764	3.23246	4.556	4.50746	4.3853	3.33562	3.03439	2.85077	3.76975	3.88322	3.44587	4.14489	3.97912	3.78695	4.75993	4.48793	4.2479	3.47769	3.5711	3.23213	3.18959	3.08914	2.81861
GRMZM2G100403_P02	12.1635	10.0648	10.9591	13.5478	11.5669	12.8251	12.4165	10.4274	11.8921	13.8835	12.0256	13.109	11.5063	9.42273	10.8978	12.4236	10.7524	11.6728	11.8066	9.50695	11.1049	13.2522	10.2332	11.5392
GRMZM2G129208_P01	4.00565	4.58835	4.52916	3.76123	4.17586	4.14527	4.23641	4.84288	4.63539	4.00726	4.50802	4.57521	3.59239	4.12216	4.19269	3.59078	4.07568	4.00074	3.91601	4.24807	4.29162	3.89028	4.43897	4.62992
GRMZM2G136283_P01	3.05283	2.91982	3.29819	3.58021	3.37613	3.64023	2.9256	2.71251	3.01776	3.44693	3.28545	3.54165	2.89985	2.80814	3.28553	3.08767	3.02274	3.40876	3.01648	2.8064	3.4021	2.99043	3.06881	3.40577
GRMZM2G143651_P01	3.20135	3.08854	2.73958	3.164	3.09862	2.89505	3.29794	3.15757	2.88945	3.30567	3.13008	2.96299	2.9457	2.90039	2.55952	2.9837	2.88451	2.53463	3.01718	2.80937	2.68115	3.08447	2.93093	2.73763
GRMZM2G144995_P01	3.09925	2.80225	2.56417	3.50943	3.77667	3.00453	3.39454	3.79282	3.18596	3.7404	3.7523	3.76925	2.81951	2.582	2.00554	2.87217	2.85835	2.14469	3.13814	3.21399	2.44464	3.42656	3.22162	2.88123
GRMZM2G146192_P01	2.4124	2.90368	2.95695	2.38092	2.81659	2.88933	2.2283	2.65455	2.635	2.10572	2.66497	2.48623	2.40763	2.92973	2.95519	2.21137	2.75901	2.85846	2.06733	2.55501	2.56061	2.18633	2.71647	2.65823
GRMZM2G158595_P01	3.80796	3.79131	2.88925	3.72469	3.8685	3.04727	3.93021	3.78152	2.92423	3.90485	3.88093	3.11257	3.84657	3.9762	3.02423	3.93438	3.98599	3.00324	3.95292	3.90691	2.98692	3.89842	3.80863	3.01228
GRMZM2G179981_P01	3.13362	3.45759	3.68021	3.15588	3.25658	3.63412	3.53344	3.93629	4.02881	3.71185	4.1373	4.19707	3.03529	3.43653	3.90956	3.08631	3.50836	3.70508	3.75793	4.07755	4.42569	3.58569	4.1898	4.41947
GRMZM2G321725_P02	2.95185	2.48847	2.95173	3.29061	2.92914	3.23952	3.25987	2.6367	3.18384	3.83569	2.99786	3.88456	2.77242	2.56071	3.00976	3.09463	2.54415	3.12288	3.39289	2.93014	3.32393	3.40205	2.91283	3.28378
GRMZM2G389362_P01	2.73292	2.50259	2.72592	2.84919	2.78589	3.12753	2.6776	2.74932	3.13418	2.60768	2.97483	3.36894	2.46682	2.32106	2.40413	2.81923	2.57776	2.77886	2.30932	2.38626	2.67603	2.53725	2.70228	2.7844
AC155434.2_FGP004	1.50632	2.42701	3.00431	1.50495	2.36965	2.83576	1.54122	2.4925	3.22159	1.50145	2.4545	3.05666	1.40284	2.26306	2.9798	1.51745	2.23008	2.81972	1.4542	2.33428	2.99009	1.57155	2.42892	3.09207
GRMZM2G012479_P01	3.24499	2.30764	2.43351	3.71649	2.4284	2.85871	5.45029	3.38555	4.1148	5.70676	4.09728	4.34214	3.9026	2.59107	3.17395	3.90161	2.77721	3.03375	6.81845	4.43849	5.15126	6.25882	3.97435	4.89189
GRMZM2G030203_P01	3.21485	3.6699	3.4852	3.44651	3.99724	4.08507	3.14384	3.51315	3.34236	3.42252	4.21197	3.82093	3.1795	3.84722	3.67253	3.36855	4.22469	3.73474	3.17634	3.96955	3.5203	3.04789	3.56628	3.33888
GRMZM2G033526_P01	2.063	2.71265	2.36198	2.22577	3.13269	2.59299	3.02273	3.54888	3.02906	3.69559	4.28889	3.55285	1.96859	2.54881	2.33236	2.09974	2.65987	2.42651	2.98834	3.47328	2.83043	2.93622	3.63492	2.87383
GRMZM2G049839_P02	2.86238	2.95162	2.82725	3.11032	3.23469	3.12822	2.53369	2.59119	2.56767	2.62411	2.64929	2.61497	2.85755	3.04173	2.8951	2.90674	3.17185	2.91143	2.53426	2.70738	2.48658	2.57094	2.65225	2.56879
GRMZM2G071208_P01	4.88539	4.91241	5.03963	4.90625	5.00016	5.3292	4.61525	4.89134	4.69263	4.6846	4.95353	5.09903	4.19669	4.31566	4.19614	4.34656	4.47412	4.25455	4.12346	4.05188	4.02982	4.2418	4.40091	4.359
GRMZM2G084767_P01	3.00409	3.3339	3.20323	3.65409	4.18907	3.94918	2.59503	3.00453	2.92624	3.11901	3.96107	3.54726	2.89503	3.17337	3.27092	3.06988	3.64998	3.5865	2.80205	3.3113	3.27877	2.86082	3.37678	3.23789
GRMZM2G128171_P03	2.25273	2.47369	2.25768	2.99127	3.17287	3.1313	2.29257	2.43187	2.38295	3.04287	3.0422	3.33627	2.43176	2.55403	2.52248	2.55444	2.61168	2.66481	2.77557	3.11049	3.00229	2.65878	2.60318	2.70221
GRMZM2G128995_P01	3.03019	3.04219	2.76455	3.65624	3.86376	3.46726	2.8151	2.47332	2.439	3.2401	3.03834	2.83858	2.98961	2.90042	2.81391	3.24376	3.41116	3.20395	3.05155	2.70377	2.76007	2.97344	2.56704	2.71268
GRMZM2G316665_P01	1.63722	1.29893	1.40869	1.90247	1.43626	1.55808	1.32466	1.24286	1.35041	1.49982	1.3155	1.41057	1.76867	1.401	1.61491	1.84246	1.51897	1.68549	1.74485	1.6058	1.69706	1.27985	1.18069	1.27478
GRMZM2G389118_P01	11.3033	11.1869	11.4566	11.7704	11.0497	10.6186	9.97872	8.97854	8.41673	10.1967	9.0049	8.39729	11.4458	10.3556	10.678	11.459	10.6466	10.4891	9.77872	8.72377	8.32386	10.0673	8.05389	8.61975
GRMZM2G441888_P01	3.59202	4.99222	4.30244	3.2075	4.20602	3.67399	4.04183	5.35942	4.76757	3.39512	4.65193	3.95969	4.01971	5.40625	5.14298	3.56919	4.97628	4.46532	4.01508	5.72711	4.74884	4.15954	5.68077	4.93916
GRMZM2G471357_P01	4.18795	6.17901	6.01976	3.51534	5.33243	5.01504	2.86491	3.83457	3.99082	2.31238	3.25752	3.30495	2.86404	4.02396	4.03776	2.60344	3.5971	3.77195	2.74179	3.76808	3.67563	2.91016	4.00733	4.18408
GRMZM5G806622_P01	7.33742	4.77912	3.94623	6.74312	5.2998	3.65071	1.27711	2.33572	2.36331	1.03535	3.11673	2.49028	5.73366	4.80526	3.9918	5.18505	5.0818	4.1869	0.902967	2.76491	2.76811	0.78533	2.81666	2.60265
GRMZM2G007441_P01	2.07229	3.19514	3.41507	2.41103	3.53303	3.90598	2.77152	3.44485	3.65817	3.38968	3.85057	4.43026	2.21383	3.27714	3.70941	2.33316	3.37395	3.93227	3.08255	3.62243	4.08332	2.72595	3.70289	3.86552
GRMZM2G013890_P01	1.93738	2.26237	1.9178	2.11891	2.38968	2.17191	1.92044	2.06775	1.86357	2.15825	2.43219	2.13433	1.86376	2.14347	1.93757	2.00438	2.27698	2.00022	1.9962	2.17204	1.97007	2.00068	2.25551	2.00453
GRMZM2G017086_P03	3.61412	3.15544	3.75182	3.63832	3.28996	3.87862	3.7387	3.36383	3.94239	3.86508	3.37383	3.93568	3.39928	3.10803	3.59332	3.3953	3.08899	3.59332	3.69428	3.29286	3.53253	3.65493	3.32706	3.77233
GRMZM2G054162_P01	2.44944	1.6734	2.07635	2.17491	1.53489	2.01237	2.29737	1.69184	1.9488	2.17468	1.65512	1.96732	2.25261	1.62114	2.05509	2.19434	1.6085	2.00879	2.22205	1.56529	1.93996	2.2346	1.64983	1.99132
GRMZM2G063048_P01	3.89847	3.55061	3.55511	3.74942	3.45804	3.64155	4.15785	3.6093	3.63504	3.97822	3.67812	3.73883	3.77691	3.37699	3.55873	3.86014	3.53943	3.74498	3.98519	3.44267	3.69507	3.59379	3.34485	3.4307
GRMZM2G083374_P01	0.394174	0.810982	0.376958	0.401045	0.741367	0.356133	0.395621	0.72529	0.331623	0.357051	0.762276	0.314908	0.388108	0.751901	0.476007	0.381438	0.752693	0.402089	0.358779	0.722202	0.366294	0.323785	0.733289	0.375989
GRMZM2G095194_P01	3.52521	3.80222	3.00425	3.36885	3.82888	2.97185	3.33534	3.75159	2.78365	3.4418	3.94018	2.83836	3.25995	3.61557	2.91863	3.2952	3.66735	2.85025	3.33499	3.58195	2.69892	3.43865	3.81227	2.93409
GRMZM2G103430_P02	2.90334	2.20086	3.06463	2.72817	2.14671	2.95601	3.22632	2.58693	3.6488	2.98229	2.36329	3.16431	2.63424	2.0276	2.94397	2.66219	2.08395	3.00785	2.75237	2.21169	2.90818	3.11107	2.37898	3.30626
GRMZM2G118005_P01	3.41949	3.87563	3.3749	3.48445	4.1367	3.89193	3.69218	4.03427	3.77099	3.4858	4.05699	3.48649	3.17995	3.78283	3.31772	3.39006	3.81363	3.56446	3.01722	3.69696	3.2155	3.33085	3.603	3.37802
GRMZM2G148872_P01	3.27566	3.89412	4.74211	2.97208	3.72673	4.17047	2.67296	3.24564	3.96026	2.47418	3.32508	3.67749	3.1511	3.96302	4.82778	3.05331	3.98612	4.69529	2.75706	3.41911	4.02908	2.64365	3.44018	3.89753
GRMZM2G327394_P01	1.9167	2.72547	2.15314	2.06455	2.95531	2.40799	1.97925	2.76514	2.08275	2.09382	3.19691	2.36623	1.93851	2.69264	2.2655	1.98709	2.92712	2.27023	1.92053	2.80482	2.24806	2.09956	2.9326	2.20609
GRMZM2G478709_P01	1.91473	1.66748	2.05097	1.90581	1.64552	2.0937	1.93916	1.73519	2.21964	1.9155	1.70358	2.00031	1.83716	1.54555	1.94659	1.7755	1.47435	1.84547	1.79547	1.61625	1.86398	1.91667	1.61209	1.97935
GRMZM5G826801_P02	2.60779	3.1432	2.85904	3.37688	3.65512	3.83585	5.24944	3.53561	3.59732	5.61383	4.53987	3.97485	2.91833	3.23388	3.16327	3.34302	3.39818	3.72794	5.09369	3.95097	3.55405	4.79702	3.54317	3.28767
GRMZM5G836827_P01	2.97875	2.81037	2.62722	3.11456	2.79347	2.75993	3.00813	2.66323	2.50351	3.0483	2.87882	2.68708	2.85164	2.60726	2.4749	2.88552	2.71782	2.55066	3.02972	2.73362	2.65954	3.08338	2.79541	2.73715
AC234157.1_FGP002	3.10864	2.7609	3.06451	3.18106	2.87838	3.42032	2.53517	2.32214	2.71241	3.21728	3.06531	3.35361	2.72099	2.78748	2.82051	3.07539	3.02215	3.11733	2.46779	2.56882	2.74546	2.69368	2.59483	2.76585
GRMZM2G009282_P01	2.8692	3.59782	2.45831	2.6353	3.15742	2.2954	3.24894	3.79529	2.68166	2.94212	3.48879	2.47745	2.55266	3.14676	2.29213	2.40768	3.10769	2.17328	2.6536	3.28315	2.26795	2.69049	3.42308	2.35382
GRMZM2G023194_P01	2.24994	2.73824	3.69994	2.63053	2.93388	4.32004	2.51322	2.70842	3.84071	2.74242	2.92437	4.1669	2.45939	2.60147	3.7585	2.41143	2.59684	4.08507	2.46832	2.75726	4.06555	2.52474	2.73952	4.0633
GRMZM2G027955_P03	3.10951	3.98894	3.03026	2.91853	4.11745	3.21887	2.42894	3.35458	2.54781	2.57342	3.68012	2.8048	2.74275	3.80129	2.87007	2.82757	3.69685	2.90504	2.19643	3.14122	2.31766	2.20286	3.21955	2.30548
GRMZM2G038494_P01	3.39394	3.42818	3.90756	3.59993	3.60512	3.91414	3.42192	3.62257	3.98072	3.57734	3.88816	4.03917	3.52306	3.59779	4.18277	3.61779	3.8222	4.17426	4.06247	4.02636	4.50947	3.80356	4.00961	4.29193
GRMZM2G077206_P01	3.73454	2.73417	2.80489	3.63601	2.68757	2.64315	4.04831	2.97301	2.75309	4.67661	3.31416	3.21543	4.01345	2.94681	3.18429	3.9729	2.89744	2.87873	4.60006	3.32712	3.4061	4.31812	3.11973	3.11431
GRMZM2G079257_P01	2.15794	2.2363	1.94705	2.2622	2.43457	2.32747	2.10639	1.94167	1.75879	2.27003	1.89659	1.99029	1.94804	2.11794	1.77139	2.2721	2.12755	1.89819	1.96714	1.63722	1.60755	2.01617	1.60816	1.69926
GRMZM2G079777_P01	3.57436	3.00003	2.33972	4.24687	3.57896	2.90647	3.26087	2.67628	2.13679	4.30511	3.78231	2.97159	3.58918	2.89102	2.41054	3.81971	3.26509	2.67051	4.36654	3.58345	3.00081	3.83736	3.22286	2.56357
GRMZM2G081682_P01	1.91736	2.40814	2.29359	2.34357	3.33451	2.81727	2.3503	3.4266	2.6968	2.79915	4.09647	3.31734	1.92503	2.5174	2.54711	2.40437	3.3046	3.18294	2.60887	3.58893	2.96605	2.65134	3.32333	3.17889
GRMZM2G086489_P02	2.45289	3.19182	3.43357	2.50108	3.4531	3.4339	2.70199	3.10182	3.25157	2.70545	3.51374	3.48972	2.4052	3.08666	3.463	2.27645	3.2344	3.32734	2.55545	3.14182	3.34527	2.40149	3.27665	3.25563
GRMZM2G102230_P01	3.89799	3.70404	3.9851	4.18252	3.76097	4.42429	4.75349	4.21672	5.37906	4.32766	4.15508	5.02912	3.42965	3.54814	3.94774	3.64946	3.52421	3.87759	3.98262	3.6609	4.18519	3.7766	3.42994	4.17191
GRMZM2G123122_P01	2.24892	1.89881	1.91667	2.35985	1.96557	1.87164	2.01679	1.78045	1.71822	2.20174	2.06859	1.72767	2.0548	1.74976	1.72712	2.09439	1.86354	1.71266	1.99554	1.78005	1.65911	2.02797	1.89323	1.6669
GRMZM2G134367_P01	2.55091	3.25204	2.42226	2.50495	3.24746	2.36002	2.66362	3.43169	3.04539	2.79442	3.94643	2.91489	2.12747	2.59561	2.32438	2.13652	3.07468	2.32212	2.46241	3.73635	2.74976	2.7597	3.71573	2.86118
GRMZM2G152801_P01	3.31706	3.39929	3.65252	4.17555	4.33018	4.39298	2.46935	2.49832	2.91355	2.9546	3.19096	3.35716	2.44028	2.60538	2.90831	2.93076	3.15697	3.30475	2.36289	2.36782	2.6998	2.3495	2.45108	2.77093
GRMZM2G162233_P01	2.79423	3.12108	4.18376	2.37736	2.50561	3.27159	2.54592	2.95759	3.73172	2.30892	2.58192	3.33234	2.95742	3.13504	4.2356	2.65933	2.79349	3.74792	2.8194	2.9759	3.80949	2.53743	2.92937	3.68757
GRMZM2G344967_P01	0.639399	0.489384	0.728009	0.649386	0.538665	0.792043	0.619049	0.443927	0.723725	0.566289	0.482813	0.75349	0.629978	0.534644	0.761836	0.63808	0.520669	0.773357	0.636447	0.454911	0.732957	0.621373	0.534987	0.734582
GRMZM2G394500_P01	3.71087	4.69706	3.55288	2.7894	3.19748	2.75328	3.48792	4.15253	3.53899	2.87228	3.51955	2.93856	3.73331	4.65105	3.78567	3.16038	4.00378	3.17318	3.65369	4.49157	3.63547	3.59216	4.28698	3.62195
GRMZM5G811797_P05	3.54283	4.45599	3.71162	3.54775	4.4662	3.74478	3.62377	4.46176	3.77869	3.39713	4.24112	3.68143	3.67093	4.73968	3.83161	3.58998	4.40982	3.6315	3.90284	4.56743	3.76938	3.72477	4.65799	3.85099
GRMZM5G856653_P01	3.65358	3.75898	4.00894	3.34219	3.66143	3.78742	3.48207	3.74554	3.84791	3.34759	3.84001	3.87435	3.54751	3.70944	3.86914	3.5004	3.68563	3.82989	3.61295	3.81274	3.82788	3.51371	3.78624	3.95446
GRMZM6G700127_P01	2.7856	2.93514	3.26117	2.76104	3.17456	3.43576	2.82911	3.21619	3.29192	2.94976	3.31616	3.60935	2.54857	2.96309	3.26051	2.34091	2.94273	3.03369	2.87128	3.13051	3.50056	2.91372	3.32163	3.60703
GRMZM2G002687_P01	3.04426	2.90275	2.62441	3.32848	2.95817	2.72864	2.99582	2.62792	2.35556	3.29052	2.92543	2.595	3.04396	2.93951	2.71788	3.07975	2.99579	2.76408	3.20905	2.75859	2.59658	3.00816	2.89184	2.61785
GRMZM2G025387_P01	3.05816	2.22392	2.92163	3.4037	2.77202	3.43128	3.04301	2.54821	3.11408	3.32053	2.6913	3.58543	2.91982	2.37924	3.03657	3.16048	2.55716	3.29971	3.02843	2.43549	3.29763	3.06587	2.39266	3.31367
GRMZM2G049902_P01	1.85974	1.76661	1.22388	2.13098	1.97588	1.48308	1.93452	1.73254	1.31473	2.1548	2.05166	1.46158	1.91292	1.73445	1.28915	1.99841	1.91261	1.45623	2.03681	1.91817	1.39821	1.97182	1.90809	1.37314
GRMZM2G066650_P01	3.51702	2.49587	2.38553	4.04434	3.32963	2.95037	2.4432	1.83725	1.75701	3.2361	2.18922	2.16655	3.36053	2.4971	2.27308	3.5083	2.80229	2.51123	2.94996	1.94624	1.91846	2.94055	1.9024	2.03777
GRMZM2G077541_P02	3.42837	3.51642	3.94734	3.01071	3.08941	3.71201	3.71148	3.73064	4.07482	3.3768	3.49792	3.9191	3.61107	3.91746	4.19484	3.3126	3.51251	3.83831	3.80676	3.80928	4.14032	3.74221	3.92635	4.17327
GRMZM2G096596_P01	3.29731	2.52392	2.6424	3.60097	2.70394	2.73545	3.56029	3.09247	3.08508	3.70385	3.15503	3.24241	3.23247	2.31694	2.53186	3.38563	2.45323	2.62034	3.44782	2.82549	3.03398	3.77166	2.92898	3.10848
GRMZM2G111579_P01	3.10352	2.58831	2.85984	3.33911	2.84676	3.22549	2.62165	2.25278	2.4155	2.95852	2.48871	2.77774	3.0576	2.54666	2.76978	3.21046	2.65118	2.89649	2.88681	2.34203	2.56778	2.82233	2.28356	2.48738
GRMZM2G117369_P01	3.00994	2.50777	2.81109	2.73833	2.36412	2.58657	1.91343	1.77138	1.82964	1.78146	1.67946	1.7569	2.8576	2.56135	2.68875	2.83162	2.51828	2.56232	1.93233	1.77059	1.85853	1.93528	1.82706	1.90621
GRMZM2G140811_P01	1.60379	2.72197	3.38148	1.75115	2.74599	3.52085	1.80936	2.88247	3.35704	1.80451	2.88711	3.50995	1.6809	2.88247	3.43465	1.66099	2.93952	3.5793	1.86138	2.89749	3.60572	1.82793	3.04297	3.61101
GRMZM2G142072_P01	2.28192	2.31422	2.22565	2.32468	2.30447	2.17004	2.22044	2.22275	2.10475	2.28262	2.33605	2.13179	2.14556	2.13685	2.13574	2.1659	2.18862	2.05177	2.29672	2.17399	2.07727	2.28216	2.32304	2.10299
GRMZM2G165917_P03	2.46323	2.70144	3.0202	2.25916	2.48796	2.74539	2.71773	3.1898	3.36652	2.57387	2.92516	3.1817	2.29237	2.68181	2.94203	2.24099	2.65277	2.87659	2.70697	3.14611	3.39318	2.74568	3.21496	3.47439
GRMZM2G409407_P01	2.80211	2.10373	1.96563	2.61794	2.27695	2.47719	3.45228	2.98037	3.67813	2.93262	3.02457	3.681	2.79597	2.20454	2.10744	3.02955	2.78104	2.86374	3.03688	2.85239	2.97351	3.33265	2.77641	3.25337
GRMZM2G432128_P01	7.26813	6.06271	6.2747	6.58995	5.50145	5.64328	6.45678	5.32575	5.40438	6.24399	4.99048	5.07331	8.40734	7.45778	7.66797	7.27826	6.12479	6.02076	7.34919	6.22227	6.444	7.40637	6.31478	6.47159
GRMZM2G464137_P02	2.26702	2.30896	2.66807	2.24962	2.30873	2.75878	2.68147	2.58722	3.14945	2.7103	2.70475	3.16557	2.53546	2.497	3.07186	2.36634	2.42089	2.91614	3.0902	3.02757	3.61116	3.09958	3.14487	3.65897
GRMZM5G803490_P01	3.2021	3.6031	3.47377	3.75654	4.10706	3.80174	3.26587	3.65421	3.24553	3.91528	3.83614	3.87704	3.33668	3.50052	3.33957	3.68539	4.04344	3.68862	3.58537	3.6728	3.34827	3.25278	3.58273	3.22545
GRMZM5G803952_P03	2.45969	2.96915	3.06804	2.85865	3.51153	3.66905	2.88346	3.42307	3.42074	3.46779	4.28101	4.4427	2.21983	2.82602	2.87378	2.61733	3.32775	3.40067	2.75696	3.23153	3.59431	2.73629	3.42995	3.53069
GRMZM2G011213_P01	4.23751	4.11323	4.10081	4.63281	4.68253	4.28734	3.86979	4.09516	3.87275	4.1247	4.09978	4.16547	3.78963	3.75653	3.36764	4.13233	4.08256	3.74422	3.38925	3.58805	3.02555	3.82398	3.58216	3.43622
GRMZM2G014558_P01	3.90641	3.45856	3.12933	3.07108	2.60844	2.54484	2.9283	2.422	2.149	2.48268	2.04744	1.8617	3.89837	3.42647	3.18747	3.40932	2.93944	2.6336	3.2408	2.67295	2.33981	3.06303	2.4247	2.15426
GRMZM2G033555_P01	4.28402	3.50087	2.82121	5.29143	4.38738	3.63593	3.46691	3.02792	2.4048	4.41674	3.78508	3.10457	3.09408	2.79727	2.26944	3.48774	3.15362	2.51026	2.99771	2.6978	2.08149	2.96137	2.65006	2.1723
GRMZM2G033799_P01	4.02216	4.23151	3.79251	4.14159	4.32849	3.98963	2.9137	3.04758	2.83829	3.04381	3.20585	2.9231	3.32221	3.59378	3.36381	3.83827	3.81839	3.73946	2.76066	2.84102	2.73101	2.9576	2.93338	2.62219
GRMZM2G036708_P01	5.20354	4.28168	4.01423	3.99702	3.30102	3.04305	3.27301	2.67121	2.47441	2.39674	2.01815	1.76663	5.4356	4.70701	4.3448	4.14298	3.44609	3.26302	3.01995	2.49126	2.32079	2.53115	2.08358	1.77307
GRMZM2G047592_P02	3.33118	3.13862	3.64064	2.59283	2.31949	2.48255	3.5094	3.21615	3.35164	2.76795	2.57305	2.78128	3.97766	3.72358	3.98695	3.33806	3.22632	3.44334	3.82352	3.44747	3.52011	3.65941	3.35532	3.79348
GRMZM2G057646_P02	1.30127	0.923734	0.710825	1.17743	0.817164	0.760739	1.15335	0.925015	0.835729	1.12644	0.913946	0.781413	1.06252	0.82622	0.671837	1.06863	0.813596	0.736529	1.01176	0.897938	0.732206	1.09859	0.882387	0.770722
GRMZM2G059151_P01	3.27695	2.66579	3.20427	3.66837	3.10412	3.70234	3.18076	2.51077	2.96156	3.76954	2.96888	3.62893	2.83545	2.50062	2.87011	3.16583	2.4795	2.98814	2.97709	2.31326	2.74132	3.12602	2.45705	2.90333
GRMZM2G113592_P02	2.01951	2.12531	2.41834	2.00287	2.18938	2.60264	2.02763	2.14986	2.62237	2.25912	2.42298	2.73175	1.76088	1.85385	2.33543	1.89336	1.98573	2.26825	1.94208	2.07227	2.42333	2.09456	2.20061	2.59789
GRMZM2G120975_P01	2.83379	2.80105	2.92572	2.85663	2.89574	3.01818	2.48478	2.46233	2.73049	2.62038	2.60942	2.70664	2.59276	2.56039	2.75346	2.71116	2.79488	2.82089	2.32691	2.38277	2.42867	2.57359	2.49343	2.61595
GRMZM2G134806_P01	1.77017	2.02357	1.705	2.34487	2.79655	2.39647	2.70413	3.06084	2.7326	2.94619	3.6126	3.07233	1.92284	2.26877	1.84776	2.98594	3.61767	2.84893	2.78635	3.53906	2.85288	2.53951	3.08095	2.54403
GRMZM2G146246_P02	3.03946	3.55779	3.50955	4.24247	4.99728	4.94612	3.08437	3.64771	3.40157	4.25297	5.04005	4.80775	3.29815	4.19712	4.21961	3.54225	4.47676	4.35333	4.14915	5.00423	4.8217	3.39118	4.07905	3.94038
GRMZM2G159643_P01	2.89523	3.57347	3.08006	2.80575	3.24254	3.12573	3.26748	3.55863	3.6075	3.13706	3.52827	3.35471	2.92564	3.40446	3.27495	2.94407	3.53771	3.16754	3.46779	4.05182	4.06225	3.55697	4.1031	4.32726
GRMZM2G169095_P01	2.95863	3.61337	3.3314	3.01241	3.66056	3.41885	3.10164	3.88077	3.3685	3.08835	4.00112	3.52353	2.83483	3.59289	3.24759	2.85994	3.6291	3.32246	3.01714	3.75823	3.29231	3.12706	3.86395	3.49537
GRMZM2G178917_P01	2.51296	2.83384	2.74773	2.6411	2.89795	3.01231	2.40389	2.59469	2.59997	2.60525	2.93111	2.96039	2.09091	2.36279	2.35251	2.25338	2.48236	2.47541	2.21397	2.36752	2.4315	2.27855	2.52974	2.42018
GRMZM2G429000_P01	2.75339	3.14401	3.10945	2.63957	3.42576	3.2297	3.9125	4.71279	4.65311	3.57186	4.68397	4.05714	2.59584	3.03551	2.93997	2.66483	3.46611	3.11817	3.33036	4.19913	3.81632	3.53165	4.33272	4.07614
GRMZM2G462613_P01	2.75242	2.84969	2.8999	2.78922	2.77375	2.8999	3.03931	3.05426	3.08627	3.07361	3.01895	3.12537	2.94396	3.04613	3.16035	2.86059	2.84913	3.01925	3.21078	3.12628	3.41962	3.33011	3.28181	3.38934
GRMZM5G809546_P01	3.89426	3.26118	3.37422	3.0846	2.81001	2.88211	3.55575	3.10685	3.03602	2.99932	2.90963	2.79334	3.88487	3.36823	3.4478	3.47685	3.13015	3.12479	3.65982	3.2345	3.18892	3.44454	3.17945	3.1528
GRMZM5G895313_P01	3.33314	3.34701	3.23438	3.73837	3.35123	3.38038	3.6555	3.41005	3.73163	3.62945	3.4926	3.44416	3.07133	2.9593	2.90482	3.05205	3.17314	2.93687	3.18059	3.03047	3.05892	3.33957	3.23619	3.30884
GRMZM2G027723_P01	2.78424	2.81231	2.64372	3.63293	3.49403	3.30804	3.04848	2.84984	2.66121	4.04482	4.12096	3.73996	2.13769	1.99393	2.1097	2.56364	2.36176	2.4322	3.01099	2.7033	2.6338	2.77721	2.66386	2.47137
GRMZM2G039251_P01	4.04543	4.07999	4.39114	3.71374	3.8757	4.20392	3.82012	3.88152	4.20169	3.60265	4.11536	4.14343	3.73729	3.97639	4.3271	3.62424	4.0051	4.18212	3.63523	3.92688	4.1123	3.82129	4.13907	4.43828
GRMZM2G078118_P02	4.45613	3.38704	3.34812	5.28472	4.04109	4.07076	2.86562	2.11899	2.22053	3.27186	2.31491	2.42467	5.33931	4.40568	4.14369	5.20106	4.11886	3.91657	3.32465	2.3451	2.54656	3.25665	2.26831	2.3291
GRMZM2G113720_P01	2.69949	3.35117	3.12886	3.26004	3.74691	3.24841	2.70401	2.9489	2.52346	3.12999	4.19513	3.30759	2.74999	3.24794	2.93305	2.81347	3.643	3.05112	2.90346	3.5823	3.08499	2.73955	3.28464	2.72251
GRMZM2G127123_P03	3.2059	3.18008	2.82045	2.83409	2.57205	2.43767	3.73167	3.71114	3.18949	3.24237	3.13676	2.80069	3.13877	2.99247	2.85885	2.93737	2.82948	2.8067	3.34146	3.28106	2.96285	3.56836	3.29695	3.1233
GRMZM2G314133_P02	1.91746	1.37038	1.48081	2.24189	1.40908	1.54243	1.90055	1.31567	1.46801	2.08133	1.48892	1.55567	1.97305	1.3621	1.45874	1.95828	1.35341	1.52684	1.96858	1.35165	1.50743	1.95886	1.3488	1.46007
GRMZM2G329177_P01	0.369157	0.670438	0.796406	0.431968	0.674659	0.954169	0.354666	0.583482	0.890041	0.421071	0.668206	0.977706	0.374184	0.563341	0.817981	0.364975	0.657955	0.901724	0.335478	0.592769	0.800244	0.348502	0.58915	0.861729
GRMZM2G339540_P04	2.47402	2.37207	3.49245	2.48355	2.4669	3.36048	2.77195	2.13533	3.20823	2.7587	2.17546	3.17764	2.46263	2.2593	3.50379	2.41575	2.34494	3.51582	2.9319	2.07906	3.30068	2.7015	2.16694	3.4409
GRMZM2G352129_P01	3.78168	3.19007	3.46037	3.96319	2.97595	3.07565	3.29022	2.78934	3.06456	3.32053	2.9429	2.95955	3.51871	2.8533	3.3252	3.42398	2.76926	2.99213	3.24285	2.72013	3.04862	3.45884	2.75906	3.07392
GRMZM2G378717_P01	2.68802	2.81691	3.10798	2.65226	2.87787	3.26596	2.22058	2.57336	2.75174	2.33543	2.75363	3.04473	2.44473	2.84216	3.09225	2.47697	2.9249	3.15267	2.02414	2.53475	2.77566	2.15787	2.67641	2.80902
GRMZM2G449909_P03	0.988205	1.09872	0.880303	0.98002	1.12063	0.894301	0.959215	1.09216	0.809105	1.00783	1.18871	0.921519	0.98288	1.11663	0.870366	0.983373	1.14522	0.864491	1.07005	1.08782	0.866046	1.02843	1.15011	0.893869
AC196426.3_FGP007	1.94578	2.9391	2.41715	2.14356	2.9911	2.58358	2.09406	3.00212	2.51919	2.27662	3.17449	2.66382	2.0606	2.85405	2.61156	2.12773	2.89728	2.66283	2.13254	3.0414	2.76734	2.21911	3.10046	2.77452
GRMZM2G008714_P01	2.90395	3.16661	3.04742	3.16905	3.63452	3.40762	2.76563	3.02768	2.75113	3.016	3.54277	3.05458	2.7278	3.08895	2.94706	2.80548	3.22985	3.02711	2.74483	3.02473	2.81325	2.86728	3.2849	2.95184
GRMZM2G013798_P01	2.98026	2.93685	3.10344	3.03369	3.19104	3.41072	2.25487	2.31641	2.51469	2.99025	3.03991	3.30681	2.79268	2.65312	2.96828	2.94562	2.95451	3.0875	2.80501	2.66731	3.09005	2.19762	2.24085	2.51851
GRMZM2G044684_P01	2.46764	3.37121	3.1042	3.23808	4.25383	3.72438	2.39135	3.5099	2.79351	3.3674	4.34206	3.94957	2.65375	3.78626	3.22914	3.05448	4.10278	3.59041	3.26359	4.0942	3.54404	2.5637	3.53977	3.06476
GRMZM2G063909_P01	7.87711	9.01623	8.25543	9.25021	10.723	9.72647	6.3248	7.62272	6.6686	7.06023	8.9765	7.5297	7.34726	8.44792	7.76862	7.93607	9.13359	8.11518	6.17508	7.59777	6.48839	6.02924	7.48226	6.44762
GRMZM2G069676_P03	2.83099	1.76489	2.28636	3.0094	1.78443	2.34795	3.45789	2.12857	2.54142	3.50343	2.36533	2.75921	2.96357	1.75327	2.30265	2.99816	1.76982	2.34371	3.55704	2.20585	2.68089	3.67953	2.22785	2.73779
GRMZM2G071010_P01	2.88802	3.15204	3.02425	3.1343	3.18	3.40152	3.79173	3.62987	4.02231	3.28101	3.30637	3.65336	2.90647	2.97675	3.41112	2.88772	2.90425	3.45208	2.84438	2.92725	3.46712	3.26637	2.92347	3.56824
GRMZM2G074103_P01	2.85418	3.36718	3.67652	2.38608	2.7927	3.14267	2.97184	3.4279	3.7229	2.71964	3.09495	3.57487	2.84743	3.42423	3.80897	2.68389	3.25542	3.52071	2.75595	3.25976	3.74293	2.781	3.37786	3.81045
GRMZM2G114162_P01	1.33492	1.23055	1.19393	1.57199	1.34388	1.32524	1.2775	1.2084	1.17608	1.44593	1.35788	1.3245	1.28476	1.18722	1.15885	1.35512	1.22069	1.31958	1.35353	1.2084	1.24537	1.37624	1.24297	1.25645
GRMZM2G121293_P01	3.38034	3.57015	3.64052	3.13675	3.36046	3.59813	3.90533	3.9701	4.52642	3.36489	3.54434	3.82481	2.66601	3.01709	3.22727	2.69658	3.08074	3.39832	2.77087	3.17516	3.23257	3.07922	3.28195	3.55196
GRMZM2G124576_P02	2.4279	2.80649	3.1229	2.83777	3.21378	3.67547	2.94763	3.28284	3.77081	3.5305	3.63034	4.64918	2.09782	2.42159	2.65703	2.30313	2.52205	2.83875	2.80894	2.93643	3.46413	3.04631	3.18648	3.82172
GRMZM2G134980_P02	5.71468	4.14082	4.53875	6.1422	4.35603	4.93081	6.03194	4.48327	5.07703	6.33514	4.91899	5.42897	5.33779	3.9964	4.39483	5.21178	3.89698	4.41928	5.90369	4.41944	4.90959	6.32277	4.78807	5.30074
GRMZM2G143725_P01	2.61002	2.2789	2.53869	2.93361	2.37972	2.66237	3.22287	2.17872	2.59433	3.16089	2.39149	2.78376	2.59576	2.24636	2.44815	2.59401	2.16673	2.44942	3.38758	2.0323	2.78452	3.49525	2.32578	2.73875
GRMZM2G149567_P01	3.09753	2.62096	3.03251	3.01496	2.45147	2.88483	3.28661	2.72561	3.29553	3.15984	2.64525	3.29024	3.05824	2.59693	3.09966	3.02232	2.53312	2.99085	3.11901	2.73181	3.18516	3.24149	2.69486	3.22122
GRMZM2G166035_P01	3.11368	2.96148	3.03505	2.84581	2.80199	2.84234	2.92538	2.82066	2.85805	2.76077	2.8176	2.8212	2.92234	2.88801	2.92148	2.76866	2.92444	2.73753	2.83973	2.84944	2.91363	2.82363	2.93638	2.87073
GRMZM2G320307_P01	2.58113	2.97742	3.43405	2.20242	2.49563	3.04041	2.55238	2.91993	3.29819	2.29691	2.65427	3.19612	2.79372	3.13458	3.73537	2.48511	2.87069	3.30446	2.59603	2.95708	3.45739	2.4923	2.9904	3.53402
GRMZM6G617209_P01	3.8827	3.50865	4.01531	5.31435	4.76466	5.57494	3.31745	2.68066	3.14988	3.97142	3.24997	3.73288	3.04032	2.63114	3.12409	3.58156	3.24027	3.81749	2.85231	2.44518	2.81628	3.03991	2.47946	2.76914
GRMZM2G031107_P02	3.94158	3.18825	2.00919	3.96948	3.23466	2.1563	3.23208	2.77605	1.57229	3.53626	2.89549	1.70993	3.45295	3.01233	1.93624	3.66181	3.09672	1.89412	3.50953	2.84129	1.86006	3.6963	2.95521	1.86188
GRMZM2G051129_P02	3.19121	2.80285	3.11562	2.1634	2.79608	2.93256	2.52016	3.65565	3.41154	4.40754	2.90139	3.30049	5.13071	2.99053	2.9728	3.73037	3.04877	3.22999	3.55376	3.30853	3.50987	3.30284	3.49621	3.52712
GRMZM2G068244_P01	3.77276	3.20836	4.05032	4.41349	3.92492	4.91206	3.87256	3.31143	4.3274	3.90187	3.49979	4.37825	4.16417	3.76949	4.77047	4.29068	3.82514	4.80994	4.02207	3.50243	4.05927	3.5624	2.95843	3.69228
GRMZM2G076950_P01	2.77516	2.69789	2.75061	3.20795	3.18137	3.22803	2.5387	2.43896	2.34949	3.14279	3.00647	2.9727	2.77118	2.73418	2.70511	3.10039	2.90197	2.96589	2.74415	2.55655	2.57049	2.71967	2.48261	2.45768
GRMZM2G088212_P01	4.00051	3.66115	4.18942	4.16732	4.0944	4.81595	4.99591	4.89474	5.72632	4.70633	4.66074	5.71913	3.69973	3.45593	4.10454	3.72213	3.66863	4.13553	5.37817	5.24725	6.03038	5.3299	5.31716	6.27874
GRMZM2G091119_P01	3.66967	2.73396	2.71154	4.32379	3.20876	3.30864	3.7767	2.85266	2.70361	4.3354	3.3835	3.30262	3.50605	2.86177	2.96631	4.05787	2.96225	3.09574	4.28316	3.1	3.01584	4.04734	2.8971	2.89571
GRMZM2G139614_P01	1.01428	1.25214	1.31439	0.952558	1.21219	1.27845	1.10037	1.31767	1.57097	1.00041	1.28871	1.38062	0.931258	1.20121	1.3327	0.923233	1.1383	1.35222	0.970192	1.24939	1.3545	1.1077	1.34039	1.41616
GRMZM2G151549_P01	2.35532	3.46168	2.99231	2.83808	3.60037	3.33332	2.61175	3.43873	3.15629	3.26482	4.03152	3.86838	2.34322	3.28987	3.05031	2.70456	3.46201	3.36551	3.0607	3.82299	3.65217	2.82154	3.89283	3.58172
GRMZM2G322328_P01	2.58843	3.32185	3.05884	2.63248	3.46438	3.11232	2.3343	3.14005	2.74524	2.5778	3.54766	2.9856	2.513	3.36078	3.1342	2.61172	3.53649	3.19133	2.36417	3.24466	2.88077	2.37809	3.38414	2.89171
GRMZM2G409133_P01	3.82572	3.73253	3.58248	3.55482	3.44085	3.26116	3.46541	3.44123	3.08842	3.47786	3.40401	3.12871	3.84986	3.93267	3.76153	3.64537	3.73253	3.41359	3.62236	3.59808	3.31407	3.5586	3.71809	3.45003
GRMZM2G457381_P01	0.755873	0.384541	0.358866	0.87349	0.406914	0.444397	0.741199	0.385603	0.356588	0.876454	0.390609	0.408294	0.626473	0.345902	0.337113	0.718002	0.358567	0.350248	0.691321	0.370549	0.367559	0.717187	0.357315	0.376936
GRMZM2G001652_P01	1.71418	1.52351	1.25914	1.93254	1.47665	1.5679	1.68603	1.34899	1.56936	1.87589	1.45083	1.75374	1.64178	1.23039	1.36454	1.74099	1.20483	1.54265	1.68117	1.3667	1.47958	1.72742	1.39811	1.46308
GRMZM2G026371_P01	2.27001	3.01583	3.47741	3.12472	4.20661	4.60784	2.16893	3.2001	3.60729	3.50587	4.5894	5.21839	2.05876	3.20691	3.59714	2.36805	3.51816	4.02704	2.32823	3.17315	3.76448	2.17542	3.08985	3.70041
GRMZM2G031545_P02	3.47055	3.83453	3.00572	4.39104	4.81479	4.12811	4.12687	4.4512	3.35609	5.62632	6.1293	4.89414	3.67982	4.16039	3.2414	4.05023	4.40508	3.40431	5.15075	5.50425	4.28204	4.50441	4.70045	3.6882
GRMZM2G038848_P02	2.54392	2.70259	3.41524	2.44316	2.71035	3.40446	2.77721	3.00765	3.60893	2.73296	3.06417	3.69617	2.35289	2.72919	3.28354	2.37015	2.65022	3.25827	2.93349	3.03369	3.67394	2.84622	3.10213	3.65945
GRMZM2G044027_P02	2.71929	2.70453	2.65351	3.59669	3.44728	4.40408	2.56655	2.57289	2.66608	3.67608	3.27364	4.4864	2.76269	2.67376	2.298	3.10387	2.94667	3.03255	2.81983	2.60393	2.74947	2.755	2.77731	2.70991
GRMZM2G064159_P01	2.55671	2.82267	3.11637	2.37046	2.5936	2.81803	3.03406	3.43875	3.81385	2.83152	3.38177	3.64845	2.62923	3.0344	3.28208	2.6188	2.89469	3.04022	2.93483	3.34562	3.58417	3.02439	3.4885	3.69683
GRMZM2G081322_P01	3.86817	3.25266	2.65788	3.77187	3.20972	2.55184	3.87505	3.2568	3.10485	3.9167	3.2972	2.87082	3.75276	2.98256	2.79009	3.7539	3.2323	2.7583	4.10281	3.30293	3.10119	3.95874	3.46582	3.16504
GRMZM2G084942_P02	1.18548	1.38925	1.00201	1.46101	1.55658	1.29211	1.15726	1.30644	1.02213	1.58096	1.6983	1.40918	1.04884	1.20822	0.916141	1.16879	1.25681	1.04021	1.19924	1.30984	1.16933	1.19842	1.27457	1.14889
GRMZM2G125294_P01	0.501158	0.441431	0.241164	0.502482	0.483142	0.252907	0.481163	0.430609	0.235975	0.456913	0.513842	0.23945	0.453463	0.497015	0.263492	0.514536	0.503927	0.286515	0.527535	0.540061	0.243526	0.562751	0.589972	0.236971
GRMZM2G127374_P01	3.01574	2.83445	2.70508	2.84433	2.75791	2.56203	2.99991	2.97342	2.49408	2.93871	2.94925	2.50281	2.79683	2.57635	2.47716	2.77886	2.5824	2.45231	2.76669	2.58815	2.36876	2.85894	2.73806	2.43777
GRMZM2G139617_P01	2.51296	2.2385	2.65788	2.42086	2.23984	2.54742	2.26144	1.9753	2.37764	2.4056	2.26464	2.48995	2.34979	1.98201	2.55981	2.31174	2.1431	2.41244	2.35729	2.01865	2.42035	2.38032	2.13796	2.5345
GRMZM2G140328_P01	2.05724	2.55131	2.61999	1.99237	2.39227	2.50274	2.2241	2.71863	2.63862	2.05453	2.67616	2.57392	2.05578	2.58731	2.68572	2.07226	2.60803	2.61352	2.28897	2.72148	2.69323	2.25476	2.7448	2.67227
GRMZM2G155323_P01	2.26927	2.77228	2.16989	2.39969	2.9309	2.31557	2.3024	2.5621	2.265	2.47441	2.60096	2.29062	2.08551	2.3194	1.89077	2.08104	2.24352	2.08613	2.17621	2.23453	1.91505	2.21146	2.33632	2.06697
GRMZM2G456086_P01	2.60371	3.03759	2.95	2.39007	2.85508	2.79157	2.66785	3.05701	2.85336	2.60371	3.06533	3.01764	2.91123	3.50465	3.4891	2.97175	3.53702	3.24283	3.06874	3.58789	3.37021	2.78294	3.35544	3.28529
AC203535.4_FGP004	3.18126	4.25585	3.83832	2.71123	3.4874	3.0042	3.20109	4.30598	3.74577	2.6851	3.97967	3.32927	3.03613	4.38205	3.99498	2.93098	4.09896	3.68849	3.19637	4.23078	3.68811	3.05785	4.25931	3.71087
GRMZM2G000510_P04	4.4135	3.34148	3.88123	4.20989	3.34884	4.00209	3.37169	2.44392	2.91434	3.50802	2.70572	3.097	3.82201	3.01707	3.60782	3.95878	3.11985	3.58044	3.31056	2.46903	2.95658	3.40555	2.55407	2.9605
GRMZM2G012966_P03	3.08277	3.46818	3.08221	3.04289	3.33584	2.97594	3.03593	3.20727	2.82243	3.07898	3.27687	2.86845	3.12108	3.38418	2.98502	2.98275	3.34612	2.93567	2.78491	2.92134	2.65591	2.87069	3.06019	2.67438
GRMZM2G018403_P01	3.12405	3.49178	3.87779	3.00912	3.43762	3.7547	3.27603	3.79211	3.73457	3.2051	3.55754	3.87513	3.11265	3.46048	3.68404	3.15603	3.55051	3.73457	3.07402	3.35392	3.68138	3.043	3.35603	3.65782
GRMZM2G022275_P01	3.61476	2.97144	2.48413	3.79638	3.12301	3.17169	3.69593	2.85156	3.00122	3.79965	2.87085	3.15494	3.46882	2.53435	2.29556	3.37892	2.58037	2.78995	3.59256	2.48612	2.50682	3.65298	2.5823	2.5957
GRMZM2G067853_P01	3.42533	3.29512	3.26379	3.15126	2.96435	2.74703	3.65907	3.47973	3.32411	3.33191	3.31567	3.08379	3.33329	3.21027	3.14185	3.15161	3.03859	2.88089	3.44257	3.2517	3.24346	3.50497	3.44459	3.31508
GRMZM2G072909_P01	2.24548	4.02805	4.86967	2.23071	4.02071	4.80523	2.09532	3.76728	4.6187	1.97134	3.70046	4.42733	2.12777	4.07246	4.75194	2.07496	3.8231	4.58818	2.1864	3.80436	4.43895	2.06802	3.78358	4.5
GRMZM2G094712_P01	3.52285	3.28571	2.78631	4.01547	3.70363	3.28571	3.54942	3.45762	2.84104	3.70707	3.69144	3.04664	3.06404	2.98701	2.56425	3.12027	3.10524	2.67939	3.47076	3.21523	2.84161	3.55011	3.55411	2.95504
GRMZM2G097109_P01	4.02616	4.38889	3.64832	3.50174	3.63156	2.95932	3.15757	3.47255	2.83537	2.95688	3.28495	2.65415	4.14878	4.36203	3.83969	3.76538	4.03839	3.41563	3.2569	3.33954	2.81217	3.18659	3.48208	2.83537
GRMZM2G108712_P03	3.56711	2.71758	2.50938	3.87581	2.79391	3.08306	3.17109	2.34492	2.22114	3.56528	2.51694	2.82054	2.93874	2.18429	1.95505	3.13309	2.18801	2.2382	2.77032	2.04196	2.00878	2.97856	2.21239	2.16385
GRMZM2G142873_P01	2.51566	2.56292	2.11557	2.74247	2.74936	2.35934	3.24374	2.9092	2.53778	3.16788	3.02348	2.69052	2.80565	2.77177	2.40583	2.98249	2.85699	2.4416	3.33514	3.20205	2.82269	3.20697	2.92423	2.62668
GRMZM2G152775_P04	3.02107	3.10011	2.93315	3.00168	3.13423	3.27602	3.17112	3.27349	3.1646	3.13652	3.22728	3.32921	2.80777	3.19254	2.74686	2.82627	2.96146	2.7216	2.87579	3.0235	2.8244	3.15979	3.08739	3.00416
GRMZM2G311919_P01	2.3874	2.53824	2.2301	2.33255	2.4882	2.18776	1.95702	2.11801	1.75093	2.04892	2.10984	1.85856	2.16223	2.33272	2.18934	2.18797	2.34931	2.09297	1.96352	2.01589	1.84956	1.96039	2.0478	1.84078
GRMZM2G324390_P01	0.559969	0.874797	0.989267	0.671384	1.03546	1.12721	0.602309	0.978774	1.11057	0.636301	1.04083	1.14757	0.612294	0.964887	1.1269	0.71487	1.09752	1.22189	0.607001	1.02061	1.21775	0.595871	0.987124	1.05884
GRMZM2G375984_P02	2.57175	1.37172	1.55987	2.39468	1.23044	1.41121	1.95067	1.21642	1.42467	1.78237	1.23703	1.2814	2.35863	1.30402	1.48404	2.28678	1.26709	1.33712	1.76922	1.17304	1.23644	1.88588	1.20024	1.26525
GRMZM6G326542_P01	3.79586	5.01958	5.62236	4.23772	5.59415	6.42988	3.69109	4.84746	5.22273	4.21337	5.44612	5.95429	3.39536	4.44953	4.87759	3.4978	4.67585	4.90402	3.49123	4.41591	4.78292	3.67756	4.5514	5.20622
AC233922.1_FGP005	3.30056	2.32186	3.10665	3.31966	2.32816	3.18737	4.00296	2.8035	3.7967	3.75943	2.62149	3.47916	3.17782	2.36527	3.33656	3.09103	2.27053	3.09786	3.61533	2.61006	3.36986	3.7332	2.67913	3.62584
GRMZM2G004997_P02	2.6951	3.08095	3.19572	2.682	2.91497	2.97745	2.83837	3.42139	3.55655	2.6804	3.29628	3.35991	2.41711	2.81155	3.02366	2.41097	2.77132	2.93452	2.53686	3.25227	3.3527	2.7392	3.45126	3.59949
GRMZM2G009232_P01	2.52345	2.04525	1.6111	2.61048	2.11764	1.71213	2.69977	2.11603	1.71591	2.83081	2.30373	1.89609	2.05312	1.64658	1.30026	2.31017	1.89284	1.56107	2.51038	1.94458	1.68004	2.46183	1.93335	1.52339
GRMZM2G023591_P01	2.68272	4.07875	3.56528	2.41903	3.48958	2.79826	2.27264	3.3125	2.74058	2.08929	3.41458	2.38525	2.96123	4.38667	3.63356	2.67852	4.1425	3.25668	2.4154	3.62958	2.78334	2.48118	3.54583	2.83704
GRMZM2G048324_P01	1.80462	2.18304	2.53292	1.60078	1.98007	2.37396	2.41074	3.01729	3.11754	2.10267	2.62421	2.86435	1.91279	2.43433	2.77012	1.74204	2.16543	2.49618	2.7392	3.32638	3.42022	2.68717	3.26926	3.42472
GRMZM2G070422_P01	4.57899	4.38312	4.69117	4.79571	4.3528	4.72734	4.57574	4.37532	4.57749	5.16326	4.49573	5.07916	4.27549	4.06911	4.44127	4.61844	4.42816	4.73908	4.79061	4.4312	4.73062	5.20177	4.46455	5.01387
GRMZM2G080603_P04	3.68796	3.21403	2.60596	4.06163	3.15648	2.75306	4.86879	3.66461	3.51992	4.77315	3.95509	3.43204	3.66027	2.91038	2.66464	3.54691	3.21923	2.68619	4.03837	3.5688	3.13021	4.36293	3.31137	3.20799
GRMZM2G142870_P01	1.43082	2.22191	1.56656	1.39075	2.25955	1.59532	1.83419	2.83053	2.16027	1.72579	2.76961	2.08951	1.41648	2.08917	1.58078	1.25396	1.97928	1.47619	1.9565	2.87949	2.23349	1.99151	2.97045	2.29787
GRMZM2G153984_P01	3.62748	3.28428	2.74229	3.44494	3.15045	2.82149	4.01434	3.61306	3.25792	3.72964	3.38722	3.18934	3.69606	3.32642	2.96094	3.50174	3.12857	2.70442	4.00183	3.68062	3.109	3.98397	3.42937	3.2146
GRMZM2G169671_P01	3.07823	2.73381	3.71525	3.22241	2.90543	4.07969	3.20903	2.79495	3.92622	3.34256	2.94672	4.1947	2.83489	2.52921	3.5237	2.97299	2.62172	3.6486	2.95018	2.62789	3.81388	3.38971	2.84027	4.09797
GRMZM2G176820_P01	2.39932	2.6413	3.00017	2.23681	2.64266	2.86498	2.4759	2.89155	3.16138	2.13547	2.55218	2.72142	2.2814	2.6807	2.97176	2.28958	2.67173	2.923	2.0659	2.58533	2.64156	2.11563	2.33454	2.71573
GRMZM2G178341_P01	2.58976	2.7599	2.36921	3.44405	3.81593	3.51664	2.45011	2.81202	2.66636	3.73205	4.12668	3.80144	2.26467	2.71118	2.20211	2.89892	3.21851	2.68065	2.3157	2.88312	2.45421	2.30475	2.67265	2.30939
GRMZM2G302233_P01	3.00904	2.41219	2.57606	3.55593	2.93873	3.20996	3.14077	2.61391	2.6237	3.94992	3.41781	3.48836	2.79764	2.26338	2.42905	2.94112	2.54914	2.72154	2.76206	2.2881	2.3914	2.84351	2.51676	2.55993
GRMZM2G320013_P01	1.56804	1.06278	0.900479	1.68248	1.03213	0.914716	1.87554	1.1973	1.06448	1.85644	1.2227	1.06283	1.63966	1.06864	0.950034	1.62597	1.04005	0.930139	1.83622	1.16439	1.09998	1.91565	1.21201	1.07734
GRMZM2G377115_P01	3.14716	3.48832	2.99154	2.84048	3.21977	2.68256	2.8367	3.2173	2.70794	2.71295	3.19048	2.65958	3.37576	3.70041	3.27484	3.09867	3.51549	2.88556	3.23533	3.5162	3.10348	2.75294	3.15202	2.6945
GRMZM2G450125_P01	2.66673	2.50869	2.87993	2.43487	2.4552	2.88231	3.84309	3.89106	4.5401	3.29419	3.38617	3.84913	3.0932	3.17016	3.57328	2.81237	2.69576	3.18286	3.99231	3.97219	4.65853	3.86324	3.92077	4.43386
GRMZM2G702490_P02	2.67589	3.00392	3.52169	2.6244	2.75816	3.52997	2.30661	2.54194	3.13423	2.20148	2.43602	2.96211	2.70566	2.99544	3.62468	2.57211	2.87665	3.60019	2.4584	2.58875	3.27035	2.45545	2.79912	3.35677
GRMZM2G035503_P01	2.61568	2.58416	2.48084	2.04533	2.12638	2.13067	2.40559	2.34524	2.36437	2.03513	2.11344	2.1317	2.45684	2.42471	2.40019	2.14272	2.20433	2.2224	2.16898	2.10455	2.12268	2.12972	2.09719	2.14716
GRMZM2G052088_P01	2.97659	2.56457	2.89167	3.1957	2.77421	3.26777	2.73433	2.48633	2.88263	3.06776	2.70927	3.32468	2.91205	2.55357	3.10998	3.00062	2.69189	3.05969	3.23419	2.58886	3.33402	2.87876	2.6313	3.12955
GRMZM2G081155_P02	2.68965	3.04552	2.65793	2.46941	3.13577	2.61083	2.51252	3.02399	2.47538	2.41448	2.8967	2.42482	2.85339	3.24944	2.76092	2.54326	3.13862	2.53552	2.81134	3.21999	2.69359	2.70595	3.28997	2.84102
GRMZM2G085924_P01	1.48144	1.64166	1.68613	1.77674	1.91909	2.03597	3.30477	3.54493	3.61225	4.14242	4.69516	4.71158	1.57642	1.70783	1.86474	1.78786	1.92103	2.09819	4.24867	4.48777	4.71527	3.68167	4.08252	4.27587
GRMZM2G139550_P02	1.80744	1.9809	2.02654	2.21586	2.42546	2.45573	1.57442	1.80405	1.8348	2.13789	2.44342	2.45493	1.67452	1.96839	1.98525	1.89398	2.21267	2.12744	1.9054	2.12808	2.1353	1.79049	2.03703	1.98001
GRMZM2G145972_P02	3.1566	3.14862	3.44934	3.47047	3.37409	3.90791	2.97679	2.97253	3.37547	3.25997	3.31182	3.69709	2.90036	2.91498	3.24968	3.08079	3.19548	3.55702	3.09113	3.00586	3.36641	3.06388	3.07661	3.39708
GRMZM2G177412_P02	2.31277	1.88059	1.6709	2.50208	1.90496	1.89358	2.75895	2.26849	2.00535	3.25678	2.63017	2.46473	2.06074	1.60329	1.52781	2.13821	1.68231	1.64615	2.57102	2.07463	1.96469	2.39947	1.95555	1.82679
GRMZM2G315121_P01	3.07448	3.03441	3.31559	3.32589	3.01916	3.62079	3.21419	2.96862	3.89895	3.31943	3.08298	3.98681	3.13018	2.78764	3.53293	3.11787	2.94491	3.65529	3.27019	3.02989	3.90251	3.54776	3.13239	4.08713
GRMZM2G399183_P01	3.19642	3.49435	4.0001	2.8609	3.05247	3.57449	4.23883	4.49816	5.13274	2.96692	3.19919	3.93206	3.58785	3.81448	4.50385	3.21743	3.35242	3.78588	3.39391	3.91469	4.46781	3.53775	3.67425	4.60307
GRMZM2G406672_P01	2.81946	2.99487	2.69728	2.83025	3.03019	2.78731	2.75855	2.94536	2.75866	2.77544	3.11653	2.7663	2.66331	3.00121	2.6288	2.73169	2.97041	2.78813	2.67771	2.82127	2.6479	2.7436	3.12016	2.92562
GRMZM5G874500_P02	3.25758	2.29451	2.47301	3.41344	2.40688	2.60825	3.37593	2.36175	2.65064	3.61134	2.58307	2.83837	3.2233	2.23229	2.42103	3.22427	2.30705	2.48638	3.54796	2.42557	2.80077	3.34618	2.38887	2.72154
AC190628.4_FGP007	2.34883	2.32549	2.26758	2.54221	2.51875	2.3394	2.69537	2.59704	2.52087	2.77136	2.878	2.56754	2.22747	2.16585	2.13709	2.38133	2.38097	2.2268	2.38811	2.48983	2.43342	2.64533	2.64406	2.50728
GRMZM2G003765_P02	3.19872	3.16062	2.9602	3.18071	3.09498	2.86528	3.68069	3.5551	3.45382	3.37117	3.60067	3.14042	2.95999	3.04495	2.81212	3.07453	3.08733	2.84074	3.14467	3.19217	2.83724	3.38951	3.26418	3.09018
GRMZM2G014136_P01	2.18699	2.77853	2.58758	2.3716	3.17392	2.9091	2.17969	2.62149	2.69218	2.35877	2.8458	3.00012	2.03886	2.4867	2.51252	2.07866	2.60296	2.57933	2.34042	2.61752	2.76723	2.445	2.87308	2.95195
GRMZM2G024104_P01	2.3648	4.09783	3.62594	2.56323	4.33631	3.92004	2.96756	4.82677	4.30391	3.17803	5.32754	4.72755	2.20803	3.63912	3.62411	2.42958	4.06609	3.78868	2.61693	4.23155	3.98062	2.67184	4.4748	4.02915
GRMZM2G034025_P01	0.748041	0.981476	0.627284	0.693115	1.02785	0.609828	0.75462	0.918531	0.594124	0.810729	1.0457	0.660944	0.707383	0.900871	0.583112	0.705239	0.989073	0.627659	0.822335	1.01877	0.646992	0.758538	1.11773	0.650058
GRMZM2G048121_P01	3.93177	4.82971	4.18184	3.24661	4.14694	3.6623	1.59283	2.17855	1.8758	1.47864	2.0636	1.98886	4.70065	5.68515	5.22137	3.96115	4.90421	4.36749	1.55501	2.11984	1.90748	1.53335	2.07199	1.79486
GRMZM2G049269_P01	1.85695	1.72433	2.16703	2.56188	2.41495	3.04228	1.97527	1.83124	2.2869	2.74776	2.72987	3.27097	1.48353	1.33274	1.7527	1.65925	1.55168	2.10699	1.84587	1.66217	2.17719	1.8695	1.75302	2.19595
GRMZM2G077596_P01	0.585616	0.48272	0.342908	0.819034	0.541113	0.44766	0.570215	0.485606	0.352056	0.794612	0.598062	0.398683	0.519934	0.420577	0.341377	0.555677	0.460306	0.387115	0.565044	0.504173	0.364335	0.589868	0.507443	0.365866
GRMZM2G081114_P01	3.61518	2.72576	3.29363	2.95475	2.04241	2.61277	4.86757	3.69254	4.29998	2.85794	2.4205	2.60944	3.35596	2.53262	3.46086	3.41583	2.97482	3.2697	3.68474	3.14859	3.39603	3.24803	2.46278	3.05759
GRMZM2G089147_P02	3.39279	3.31483	3.27578	3.58527	3.47412	3.20657	3.3914	3.1749	3.05475	3.65867	3.72192	3.5137	3.14629	2.99958	2.91602	3.23976	3.13683	2.98044	3.28131	3.00592	2.94377	3.3045	3.1719	3.10897
GRMZM2G121221_P01	2.35472	2.33346	2.51886	2.16901	2.2786	2.49084	2.531	2.57631	2.5789	2.59996	2.74162	2.76729	2.15636	2.35565	2.53362	2.04144	2.27144	2.26067	2.52917	2.75665	2.87237	2.61834	2.68628	2.97745
GRMZM2G124963_P01	4.05529	4.02582	4.26146	5.54501	5.52437	5.71895	2.58376	2.50206	2.55451	3.27406	3.30316	3.37844	3.10674	3.09019	3.33538	3.92273	4.01525	4.07616	2.22972	2.17813	2.25356	2.28267	2.36103	2.42155
GRMZM2G126019_P01	2.31189	1.84326	3.23705	2.8846	2.94636	3.14524	2.86672	3.09781	3.80478	3.35003	2.56228	3.28815	2.62717	2.71159	3.2115	2.91194	2.73153	3.44482	3.06525	2.41914	2.89844	2.98242	1.68801	2.97003
GRMZM2G152757_P01	3.38808	3.43246	3.64745	3.40462	3.50938	3.87089	3.10486	3.25566	3.29595	3.03968	3.25705	3.52645	3.10486	3.2212	3.62072	3.26467	3.34093	3.58917	2.83289	2.92396	3.10109	2.86035	3.05936	3.34829
GRMZM2G168096_P01	0.608853	0.40756	0.464201	0.649137	0.396497	0.518693	0.610873	0.351912	0.482745	0.676258	0.383029	0.504512	0.614424	0.36575	0.480811	0.5892	0.360792	0.524643	0.651157	0.373594	0.532576	0.600098	0.360866	0.491819
GRMZM2G179703_P02	1.70658	0.897522	1.28143	2.08775	1.08829	1.45736	4.49428	2.70958	3.29023	6.22364	4.03135	4.71846	1.97639	1.01364	1.42872	2.05511	1.09947	1.58411	4.10444	2.43089	3.00374	4.35181	2.72927	3.23595
GRMZM2G315375_P01	1.70544	1.86074	2.11333	1.85647	2.12424	2.38068	1.784	1.84371	2.15025	1.85107	2.37407	2.43797	1.56066	1.7202	2.13052	1.73078	2.01345	2.36264	1.72014	1.99305	2.22175	1.79143	2.07053	2.20287
GRMZM2G331533_P01	2.24023	1.68896	2.53242	2.27118	1.63539	2.45352	2.27164	1.64676	2.49831	2.31703	1.66572	2.54845	2.15953	1.57406	2.41382	2.17879	1.5279	2.40186	2.2063	1.59071	2.51206	2.35531	1.6705	2.63956
GRMZM2G387076_P02	1.40495	1.38424	1.52207	1.73029	1.71313	1.79238	1.8504	1.58874	1.8334	2.03981	1.97658	2.09621	1.41741	1.51272	1.60212	1.51862	1.58944	1.72151	1.52996	1.56927	1.70743	1.50854	1.66588	1.72488
GRMZM2G432390_P01	2.41482	2.93579	2.74784	2.07242	2.61912	2.53415	2.34311	2.85038	2.59364	1.98053	2.52644	2.44532	2.36828	2.85328	2.7146	2.21774	2.75015	2.5794	2.30583	2.65049	2.66124	2.29728	2.81435	2.72382
GRMZM2G432566_P02	0.85698	1.86462	1.61168	0.817214	1.7131	1.61433	0.916942	1.80433	1.68349	0.924842	1.72235	1.67605	0.838668	1.74209	1.5991	0.842079	1.56532	1.54036	0.87969	1.73142	1.66165	0.923585	1.85679	1.61333
GRMZM2G461356_P01	1.01209	1.44224	1.56265	1.04194	1.42537	1.47786	1.05929	1.50704	1.53443	1.11607	1.6532	1.53428	0.874119	1.36968	1.41827	0.90488	1.47718	1.41254	0.930498	1.50584	1.49144	1.06111	1.61946	1.56853
GRMZM2G461569_P01	2.06752	2.1225	2.23205	1.95322	2.04498	2.25622	1.88851	2.00248	2.06168	1.81634	1.98903	2.03295	1.85565	1.98262	2.18666	1.7988	1.88482	2.05689	1.78489	1.90468	2.0439	1.83508	2.0689	2.12965
GRMZM2G477236_P01	4.66428	4.06531	4.4112	6.02712	4.64677	4.68131	5.42685	4.73521	5.0931	6.47371	6.23841	5.87689	4.75792	4.05998	4.2755	4.81411	4.47724	4.32559	6.47227	5.19915	5.61149	6.36374	5.57792	5.72493
GRMZM5G817439_P01	2.13496	2.01617	1.71309	2.03054	1.83866	2.17366	2.06929	1.68128	1.91191	2.0426	1.41501	1.963	1.92936	1.67918	1.76733	1.95132	1.45283	1.85017	1.9074	1.42254	1.67679	1.93453	1.49432	1.94406
GRMZM5G831712_P02	0.660757	0.750406	1.29631	0.724991	0.829501	1.49168	0.660207	0.779651	1.37427	0.722728	0.888435	1.58025	0.57762	0.621387	1.24583	0.543484	0.70159	1.33223	0.547032	0.689552	1.35046	0.563182	0.739476	1.32896
GRMZM2G010221_P01	2.08541	2.3766	2.2422	2.1647	2.36473	2.2185	1.82515	2.06756	1.89652	1.93854	2.21754	1.97422	2.0762	2.31139	2.38004	2.08185	2.40199	2.31924	2.02035	2.17422	2.10722	1.80779	2.08596	1.86206
GRMZM2G011219_P01	1.02738	0.947109	0.881983	1.31193	1.30605	1.19575	1.19776	1.19316	1.08172	1.48625	1.58495	1.41266	1.0261	0.968875	0.87614	1.32564	1.27498	1.14626	1.39268	1.47256	1.33608	1.23226	1.25232	1.06941
GRMZM2G014116_P01	1.8271	3.02988	2.29321	1.8954	3.3108	2.70415	1.92283	2.82974	2.35929	2.08757	3.37918	2.69679	2.02818	3.27808	2.69286	2.05088	3.30873	2.99375	2.14788	3.51006	2.72209	2.04016	3.35354	2.53786
GRMZM2G017730_P01	3.98099	3.66384	3.9683	3.96481	3.75219	3.88108	4.49431	3.68491	3.79772	4.67095	4.19982	4.10763	4.01084	3.59546	4.02813	4.10579	3.9821	4.13696	5.16852	4.05899	4.12268	4.60378	4.06268	3.9575
GRMZM2G030529_P01	0.116913	0.480617	0.240148	0.103904	0.443384	0.185037	0.136474	0.521223	0.313621	0.117069	0.519133	0.2296	0.13747	0.481045	0.271047	0.117117	0.469837	0.2226	0.13657	0.550953	0.273708	0.134482	0.533808	0.264239
GRMZM2G031169_P01	2.17479	3.22122	3.02345	1.78023	2.73131	2.63763	2.09238	3.15183	3.07148	1.88384	2.90558	2.70167	2.11774	3.07529	3.01183	1.88341	2.85053	2.68315	2.0561	2.95053	2.97667	2.0115	3.11372	2.89411
GRMZM2G055331_P01	2.39956	2.51719	2.51224	2.48953	2.4483	2.45756	2.47202	2.45111	2.24435	2.51871	2.7634	2.4307	2.18679	2.36283	2.32422	2.14351	2.49397	2.33932	2.42996	2.43146	2.34796	2.35992	2.53173	2.34364
GRMZM2G074546_P02	2.61973	2.36088	2.26231	2.16418	1.90406	1.879	2.52757	2.20971	2.05211	2.06733	2.04096	1.82976	2.95858	2.64372	2.50386	2.71214	2.45476	2.37161	2.62652	2.22611	2.08501	2.32395	2.1598	2.01634
GRMZM2G080816_P01	3.8126	3.73435	3.39718	3.69625	3.40281	2.65949	3.74701	3.51991	3.01046	3.36907	3.43855	2.72181	3.60294	3.37734	3.16003	3.52602	3.62865	3.13575	3.70133	3.39635	2.9747	3.54477	3.50204	2.94059
GRMZM2G082260_P01	1.31712	1.77438	1.203	1.40452	1.88304	1.43614	1.43161	1.7948	1.41803	1.51567	1.8574	1.59446	1.26055	1.65357	1.26141	1.3354	1.71144	1.34596	1.37357	1.66504	1.33283	1.36156	1.66032	1.40818
GRMZM2G086648_P03	1.80147	2.61229	3.79273	2.02012	2.90233	4.13176	1.75914	2.66784	3.60446	2.02733	3.03053	4.16626	1.69899	2.41892	3.56808	1.87441	2.73301	4.01512	1.93799	2.7907	3.86661	1.88054	2.84438	3.85498
GRMZM2G105019_P01	2.48914	2.92618	2.69273	2.55623	3.0236	2.75007	2.51125	2.67015	2.46442	2.63705	3.01432	2.73282	2.30361	2.81136	2.59291	2.3402	2.9082	2.56981	2.51379	2.77163	2.52628	2.64874	2.87457	2.67096
GRMZM2G120857_P01	2.69864	2.99499	2.9503	2.47189	2.79412	2.77631	2.44791	2.78043	2.58144	2.37303	2.69491	2.58409	2.47242	2.98768	2.88241	2.49534	3.00929	2.78101	2.47189	2.87447	2.68549	2.56888	2.86412	2.75896
GRMZM2G133121_P01	2.6435	2.71904	3.01622	2.53863	2.76427	2.99696	2.89665	2.74411	2.9543	2.76502	2.69697	2.92911	2.67763	2.70078	2.99222	2.62056	2.72258	2.96763	2.83575	2.71386	2.99815	3.02227	2.93838	3.1454
GRMZM2G156630_P03	2.69779	2.31305	2.63914	2.77763	2.39269	2.66532	2.69805	2.40454	2.70322	2.71209	2.43867	2.91017	2.82081	2.55315	3.10159	2.7909	2.66408	3.11167	2.9251	2.61335	2.97316	2.57763	2.62046	2.89572
GRMZM2G322314_P01	1.38536	2.17972	2.02999	1.5413	2.23703	2.11789	1.26728	1.94085	1.82902	1.22606	2.02062	1.86029	1.43318	2.12048	2.11769	1.49628	2.26141	2.15443	1.30613	2.05462	1.94169	1.34441	2.18528	1.949
GRMZM2G460078_P02	2.53392	2.60332	2.58225	2.73564	2.79204	2.98984	2.42116	2.61255	2.47271	2.75596	2.99446	2.9271	2.29775	2.45862	2.40003	2.36838	2.48129	2.58461	2.40976	2.46336	2.48055	2.47742	2.59436	2.56291
GRMZM2G469969_P01	2.71753	1.91356	2.75579	2.97764	2.05595	3.01452	2.47721	1.67281	2.35565	2.67304	1.91586	2.5222	2.54393	1.83472	2.63818	2.781	2.03662	2.8396	2.44385	1.80601	2.52274	2.3858	1.76448	2.35133
GRMZM2G136262_P01	2.46588	3.62384	3.07568	2.50878	3.50536	3.1521	2.78324	3.59571	3.4082	3.0715	4.20144	3.95228	2.27095	3.5377	3.05105	2.48118	3.5036	3.02137	2.6292	3.92582	3.6245	2.78926	4.10652	3.71482
AC217556.3_FGP003	3.39206	3.07502	3.29598	3.24505	2.93556	3.09489	3.29653	3.05884	3.12455	3.26943	3.20577	3.20408	3.05299	2.74069	2.95833	3.02792	2.85431	2.88109	3.39036	2.96545	3.18289	3.32566	3.16437	3.25818
GRMZM2G009845_P02	3.6379	3.51438	4.00038	4.19796	3.84133	4.37762	3.7232	3.267	3.35782	4.26937	3.66795	3.96079	3.89651	3.77114	4.20708	4.11189	3.88754	4.4271	4.32418	3.54044	3.7697	3.839	3.51021	3.89951
GRMZM2G013650_P01	2.83759	2.45661	2.17478	2.74908	2.33358	2.04992	2.99481	2.45637	2.21862	2.86932	2.25066	2.06604	2.9293	2.44573	2.15801	2.76392	2.32197	2.07119	2.91562	2.31545	2.12342	2.94036	2.41963	2.13803
GRMZM2G018484_P01	2.4255	2.34231	2.60407	2.26887	2.20898	2.37793	2.72606	2.55737	2.71117	2.48146	2.34838	2.4949	2.43821	2.3269	2.70883	2.11932	2.10927	2.37897	2.75832	2.52935	2.82268	2.78226	2.57745	2.90145
GRMZM2G024823_P02	3.16273	3.13354	3.41655	2.95526	2.9633	3.36488	3.32208	3.31905	3.91558	3.07055	3.1273	3.46129	3.17742	3.13946	3.52683	3.00931	3.08957	3.3302	3.13898	3.10423	3.43563	3.16367	3.12356	3.54903
GRMZM2G025882_P01	4.23504	3.85933	4.22036	3.09027	2.9646	3.02149	3.53696	3.28797	3.48488	2.82641	2.65096	2.80217	4.4773	4.29008	4.78888	3.83448	3.93916	3.81634	3.58059	3.59188	3.52693	3.41895	3.41602	3.33894
GRMZM2G030659_P01	1.09928	0.90727	0.928541	1.2113	0.861987	0.888607	1.15994	0.889336	0.885376	1.14546	0.934977	0.909247	1.05459	0.866829	0.850916	1.06619	0.837059	0.890312	1.12352	0.81231	0.794739	1.13972	0.890232	0.852262
GRMZM2G037204_P01	3.00829	2.65085	2.79978	3.35264	2.83133	3.18898	3.09655	2.69268	2.60452	3.61839	2.61651	2.99531	3.17193	2.54551	2.58374	3.16162	2.55764	2.54538	3.38742	2.54732	2.69402	3.20317	2.55816	2.58827
GRMZM2G063850_P01	5.0098	4.10357	5.26194	6.62426	5.48365	6.72365	6.62828	5.62149	7.04876	6.80275	5.91487	7.09076	5.47538	4.50402	5.98216	6.81381	5.75848	7.15869	6.76554	5.76312	6.78483	6.88018	5.8508	6.9492
GRMZM2G082007_P01	3.1021	3.05798	3.3139	3.16213	3.04515	3.45501	3.43803	3.48226	3.69235	3.63212	3.15913	3.70855	3.08748	3.0914	3.40606	3.17053	2.94191	3.35643	3.14751	3.07946	3.58533	3.26011	3.14272	3.48236
GRMZM2G098423_P01	3.20183	2.94602	2.98658	2.98355	2.78454	2.77013	3.22916	2.92672	2.8698	3.01409	2.67739	2.74418	3.02149	2.7513	2.8931	3.09446	2.93444	2.80168	3.23976	2.88398	2.85742	3.21565	3.09562	3.07711
GRMZM2G102878_P01	1.56999	1.53099	1.46673	2.01237	1.87022	1.68447	1.55566	1.44403	1.25371	1.90097	1.75646	1.72761	1.47292	1.41332	1.33157	1.61144	1.67953	1.6276	1.41483	1.61231	1.46559	1.46182	1.69316	1.44273
GRMZM2G132060_P01	2.57252	3.82103	3.14807	2.60248	3.66946	2.92253	2.54074	3.90381	3.3491	2.43627	3.54435	3.0931	2.55793	3.49256	2.88044	2.38391	3.4147	2.83081	2.44487	3.58668	2.87196	2.46128	3.5674	2.904
GRMZM2G157157_P01	1.8713	2.24332	2.10395	1.90977	2.36016	2.17365	1.77866	2.33031	2.47205	1.96843	2.6834	2.42911	1.59734	2.20367	2.23384	1.75727	2.29136	2.33353	1.44415	2.34943	2.10611	1.67308	2.53834	2.14775
GRMZM2G352415_P03	3.11131	2.65328	3.12678	3.38469	2.94601	3.28278	3.35146	3.14361	3.49374	3.57907	3.11948	3.51663	2.79591	2.55706	2.91582	2.94609	2.65437	2.97383	3.33579	2.88584	3.2837	3.49568	3.04034	3.40673
GRMZM2G365374_P01	5.03421	4.66577	4.97276	5.98892	5.87164	6.14371	6.09737	5.45426	5.83478	6.89935	6.70451	6.63949	4.09493	3.95802	4.32551	4.56159	4.52744	4.93988	5.32127	5.20969	5.34398	6.00235	5.60866	5.7999
GRMZM2G011319_P02	2.83282	2.8623	3.13662	2.66799	2.75068	3.03389	2.50069	2.57319	2.84445	2.42664	2.59362	2.77219	2.85119	2.91753	3.31727	2.81143	2.88502	3.20228	2.45955	2.67186	2.77062	2.44968	2.74579	2.92268
GRMZM2G026980_P01	4.17865	4.03823	4.33221	3.20001	2.86784	3.38942	3.30275	3.0766	3.46407	3.11212	2.80116	3.12656	3.27176	3.25797	3.63529	3.22166	2.99167	3.39925	2.72533	2.33999	2.62901	2.98772	2.62654	3.02419
GRMZM2G044137_P01	3.48784	3.34531	3.04585	4.11661	3.78825	3.58736	3.69221	3.45547	3.30634	4.27537	4.22986	3.76476	3.34683	3.17793	3.15633	3.53623	3.65064	3.31972	3.8064	3.68272	3.29264	3.73851	3.66982	3.52699
GRMZM2G052435_P03	1.04451	1.40316	1.20475	1.15829	1.63882	1.67974	1.09369	1.40882	1.13354	1.22686	1.542	1.51853	0.912796	1.53257	1.25958	1.10578	1.53055	1.49746	1.27479	1.48113	1.40632	1.1833	1.46295	1.30008
GRMZM2G052630_P03	2.42143	2.09371	1.75417	2.1489	2.19377	1.76377	2.501	2.22439	2.09485	2.25791	2.4698	1.85185	2.3138	1.99947	1.88342	2.12476	2.1694	1.67108	2.5394	2.23582	2.0173	2.6928	2.61363	1.96356
GRMZM2G063517_P02	1.46281	1.55413	1.50971	1.54652	1.65721	1.62446	1.57897	1.7265	1.61592	1.59261	1.91708	1.81327	1.3814	1.43839	1.50661	1.31765	1.4603	1.55086	1.52656	1.59132	1.67197	1.59347	1.65505	1.70722
GRMZM2G069195_P01	2.75293	2.11629	2.65623	2.72586	2.12521	2.48162	3.29318	2.73266	3.06626	3.51792	2.99681	3.64073	2.73188	2.03368	2.48396	2.92873	2.14912	2.65101	3.61033	2.88789	3.64569	3.43918	2.95833	3.37451
GRMZM2G075470_P02	1.75765	1.43481	1.36056	1.73858	1.60786	1.44661	2.01301	1.72126	1.57296	1.99617	1.74362	1.60387	1.68444	1.4089	1.41625	1.67585	1.44265	1.39637	2.05477	1.70809	1.55417	2.07952	1.93281	1.64921
GRMZM2G077258_P03	3.39404	3.69943	3.41269	3.33694	3.70281	3.33324	2.96628	3.26257	2.8273	3.04028	3.6649	3.11982	3.29572	3.54743	3.27097	3.32646	3.71895	3.36926	2.86897	3.2044	2.86231	2.77132	3.19952	2.80441
GRMZM2G078985_P01	2.94801	2.64231	2.96957	3.72048	3.23092	3.34183	2.96237	2.35286	2.65227	3.88231	3.68896	3.52735	2.97762	2.45013	3.74354	3.2268	3.05656	3.60387	3.33175	2.71362	3.78908	2.95065	2.86464	3.37249
GRMZM2G099367_P01	3.38384	3.27514	3.39018	2.97826	3.04227	2.96047	2.32482	2.3477	2.16871	2.16345	2.31555	2.14659	3.71222	3.7788	3.8368	3.30067	3.6732	3.38432	2.81656	2.93734	2.72398	2.32018	2.63	2.38893
GRMZM2G106133_P02	2.89986	3.13513	3.55335	3.00101	3.18154	3.66654	3.59071	3.50056	4.14474	3.33205	3.68619	3.97853	2.73463	2.86837	3.3832	2.72781	2.96702	3.3678	3.24336	3.29648	3.80552	3.47057	3.36471	4.10032
GRMZM2G109284_P01	1.19853	2.02804	1.79452	1.1405	1.95147	1.76848	1.17582	1.91101	1.86446	1.18034	1.88023	1.78281	1.03681	1.75137	1.64721	1.01612	1.80485	1.72477	1.04454	1.84826	1.65986	1.20733	1.82478	1.75788
GRMZM2G124059_P01	2.42867	2.7445	2.61806	2.83048	3.1212	3.05566	2.35852	2.5357	2.33151	2.84877	3.1368	2.98596	2.47576	2.77222	2.70537	2.70723	3.00953	2.92534	2.71925	2.81042	2.70926	2.63133	2.86962	2.66884
GRMZM2G125310_P01	3.22131	2.27829	2.12133	3.23919	2.23533	2.10301	3.41997	2.45264	2.27425	3.13156	2.13922	2.14731	3.19529	2.29503	2.1094	3.13254	2.21747	1.96414	3.24667	2.18332	2.10258	3.41347	2.1987	2.17798
GRMZM2G147884_P01	2.22702	1.831	2.35071	2.41732	1.91197	2.51041	2.79478	2.26327	2.92072	2.9871	2.29988	3.1141	1.89269	1.56265	2.11564	2.22679	1.80413	2.32457	2.5847	2.07067	2.70096	2.8696	2.25642	2.96289
GRMZM2G156486_P01	3.35003	2.6733	2.74563	3.24257	2.53044	2.87169	3.81559	3.15579	3.20931	3.83055	3.37829	3.20196	3.71561	2.79864	2.87605	3.72717	2.6941	2.85181	4.24544	3.35476	3.1004	4.07302	3.41469	3.14315
GRMZM2G169699_P04	2.94076	2.62605	2.89367	2.8692	2.51644	2.75935	3.06042	2.64269	2.85089	3.13109	2.79616	2.99062	3.23115	2.82099	3.1777	3.15187	2.85849	3.04823	3.40337	2.92585	3.24044	3.21215	2.81333	3.0391
GRMZM2G316967_P01	3.69013	3.10774	3.59876	3.60893	2.90217	3.52387	3.43817	2.99178	3.3898	3.37809	2.79799	3.33208	3.11631	2.80853	3.29335	3.15454	2.64017	3.25645	3.25102	2.80295	3.21225	3.3628	2.94868	3.39345
GRMZM2G329300_P01	2.29657	2.64067	2.29542	2.33302	2.51591	2.3703	2.36489	2.59908	2.68309	2.29336	2.65461	2.44663	2.12279	2.32954	2.27014	2.11063	2.291	2.19116	2.16268	2.48422	2.30987	2.31606	2.48498	2.43339
GRMZM2G347956_P01	2.24934	3.06573	4.1562	2.20324	3.24417	4.09492	2.2151	2.80089	3.93705	2.13523	2.9571	3.68908	2.58003	3.66616	4.9346	2.73225	3.90409	4.74954	2.57934	3.38943	4.3993	2.30548	2.97244	4.03932
GRMZM2G350626_P03	0.270594	0.269567	0.430731	0.261535	0.245626	0.437537	0.24979	0.236295	0.327882	0.205469	0.265846	0.362039	0.265813	0.228224	0.376154	0.255467	0.26902	0.377114	0.244925	0.226418	0.380204	0.246407	0.259005	0.308339
GRMZM2G379002_P01	2.89128	2.67514	2.66284	2.64257	2.43612	2.3993	4.54075	4.04017	3.92804	3.70258	3.62113	3.35823	3.20231	2.97535	3.06013	2.94874	2.9016	2.79263	4.52617	4.17429	3.82041	4.54561	4.1762	3.97843
GRMZM2G416142_P02	3.36539	3.49237	3.94825	3.53263	3.63695	3.81336	2.67424	2.7936	2.81287	2.91302	3.54538	3.04224	2.97582	3.54501	3.58955	2.74678	3.58801	3.48691	2.90496	3.27774	3.20232	2.88716	3.12093	3.1045
GRMZM2G455085_P01	2.38735	2.86237	2.58432	2.22213	2.53822	2.36291	2.39421	2.76907	2.4502	2.36899	2.66697	2.49245	2.17562	2.62443	2.3596	2.09704	2.5317	2.2517	2.17782	2.41003	2.18833	2.17684	2.59721	2.31049
GRMZM5G834758_P03	1.46075	1.39314	1.95341	1.25082	1.3639	1.76407	1.63397	1.66552	2.19269	1.42801	1.46271	1.88323	1.40292	1.46703	2.05907	1.37258	1.37888	1.85797	1.65339	1.67085	2.02147	1.79755	1.59796	2.26809
GRMZM5G870932_P01	14.3673	13.8053	10.9816	14.2605	13.6153	10.9351	19.8709	19.5594	16.9323	17.5802	18.6531	15.6103	17.325	16.608	13.4268	15.5002	15.1853	12.6012	27.8831	27.2525	25.8838	29.2129	29.3211	28.6289
GRMZM5G871297_P01	2.64684	2.41786	2.63544	2.57669	2.49477	2.7093	2.63631	2.51959	2.62593	2.62449	2.67804	2.863	2.61035	2.36163	2.69817	2.55254	2.45558	2.76606	2.73266	2.50986	2.86517	2.62012	2.56267	2.83693
AC209208.3_FGP002	3.68183	3.91223	3.6028	3.84642	4.21333	3.44141	3.5313	3.84748	3.04617	3.80195	4.18298	3.33942	3.47884	3.44602	3.10288	3.44121	3.72	3.10858	3.583	3.8665	3.21393	3.63545	3.81146	3.14481
GRMZM2G016511_P01	3.60019	2.94006	3.23563	3.95678	3.24057	3.68768	3.79963	2.92704	3.28998	4.05158	3.35395	3.63593	3.4084	2.76276	3.18616	3.53784	2.9094	3.18746	3.79307	2.9039	3.31471	3.8525	2.96233	3.46246
GRMZM2G019437_P01	3.31858	3.62365	3.10467	3.1452	3.24046	2.8331	3.64468	3.63902	3.36486	3.45843	3.65054	3.20634	3.36734	3.50663	3.20034	3.37174	3.5213	3.26066	3.88409	3.8975	3.51296	3.80993	3.9209	3.51706
GRMZM2G023073_P02	2.13133	3.12871	2.38626	2.3574	3.32393	2.76775	2.18864	3.26323	2.70479	2.41955	3.45723	2.78791	2.07002	3.08967	2.48256	2.27502	3.27421	2.68289	2.29546	3.2611	2.57489	2.26259	3.20192	2.61296
GRMZM2G035417_P01	3.97435	3.04047	3.35053	4.29032	3.14659	3.47969	4.37322	3.05949	3.82903	4.34654	3.08238	3.49408	3.73921	2.76638	3.20096	3.93249	2.95158	3.14273	3.9961	2.86775	3.14976	4.34777	3.08535	3.35321
GRMZM2G042502_P01	2.03049	2.49926	2.97231	2.69871	3.47381	4.1819	2.23058	2.888	3.2101	3.00272	3.78259	4.38525	1.7547	2.28222	2.66266	2.06327	2.63534	3.12924	2.05016	2.57281	3.16548	2.16938	2.86597	3.29306
GRMZM2G044060_P01	2.59381	2.47116	2.70799	2.5822	2.33551	2.79176	2.6086	2.50795	2.46032	2.72819	2.60855	2.59248	2.51752	2.3688	2.64009	2.50801	2.4684	2.84197	2.6445	2.56951	2.4559	2.81716	2.67012	2.50949
GRMZM2G045987_P01	2.74045	2.53947	2.78703	2.85152	2.67044	3.0816	2.84231	2.56783	2.88036	2.9206	2.75294	3.05693	2.64347	2.63435	2.7789	2.53104	2.58949	2.75172	2.6646	2.55958	2.79516	2.80601	2.68591	2.86831
GRMZM2G129238_P01	2.6166	2.60522	2.88606	2.49633	2.60548	2.94461	2.54237	2.65795	2.79912	2.30912	2.55855	2.63276	2.68378	2.74944	3.18545	2.8101	2.84884	3.17183	2.77588	3.04948	3.22777	2.76581	2.92504	3.15241
GRMZM2G140545_P01	5.11309	5.42739	4.8928	6.79225	7.41646	7.19779	4.85759	4.75758	4.28334	6.4141	6.34048	6.18772	5.9169	6.11808	6.08958	6.83159	7.03013	6.70408	6.20715	6.04447	5.95722	5.86733	5.8654	5.68747
GRMZM2G362850_P01	2.80122	2.69627	2.11548	2.81129	2.73653	2.16317	2.99069	2.96851	2.28833	3.10208	2.88292	2.4996	2.74301	2.53842	2.15691	2.72425	2.57735	2.10296	2.93136	2.81146	2.33192	2.8961	2.78853	2.34163
GRMZM2G410479_P01	2.25505	2.04372	2.00754	2.25068	2.09837	2.10648	2.29388	2.1185	2.15141	2.24065	2.26128	2.22231	2.19636	2.01373	2.0331	2.18916	2.07659	2.08422	2.29279	2.14809	2.14687	2.28144	2.23971	2.24808
GRMZM2G424582_P01	1.2711	1.49607	1.66501	1.24675	1.47224	1.67027	1.2846	1.50355	1.60172	1.27161	1.58419	1.61207	1.23111	1.46186	1.60813	1.23464	1.48843	1.64923	1.19767	1.44338	1.59547	1.26252	1.55028	1.5981
GRMZM2G476933_P01	3.8952	3.987	3.5039	3.64004	3.7793	3.17206	4.02507	4.07112	4.15485	3.46648	3.5429	3.31837	3.44963	3.69758	3.23992	3.58717	3.57399	3.19503	3.32626	3.75259	3.14627	3.61015	3.59552	3.2696
GRMZM2G703415_P01	1.6276	1.21425	1.224	1.66183	1.18611	1.24878	1.63389	1.09451	1.30188	1.70731	1.14965	1.29781	1.55138	1.09303	1.19339	1.60181	1.09588	1.2315	1.51152	1.00975	1.26034	1.70466	1.15683	1.2423
AC234091.1_FGP001	2.69942	2.27572	2.4769	2.24823	1.98702	2.21884	3.05641	2.82967	3.05513	2.62633	2.54863	2.89504	2.57537	2.33727	2.52897	2.36714	2.02882	2.30082	3.23118	3.0034	3.29798	3.19591	2.98947	3.22631
GRMZM2G013478_P01	2.97354	2.94304	2.6177	3.02288	2.92802	2.48992	2.8524	2.77132	2.50703	2.73214	2.8644	2.4044	2.77055	2.71801	2.60889	2.78001	2.92448	2.45519	2.89465	2.92301	2.42332	2.97383	2.92772	2.49355
GRMZM2G035948_P01	2.45603	3.18817	2.77535	2.74996	3.57787	3.14405	1.99076	2.63873	2.1557	2.01904	2.78739	2.13947	2.42091	3.20019	2.80911	2.55857	3.51619	2.9041	1.94574	2.63366	2.03009	1.859	2.45779	2.04213
GRMZM2G042253_P01	3.59474	3.49747	2.46729	3.79105	3.88817	2.80085	3.36855	3.2841	2.30125	3.53179	3.52825	2.54743	3.13633	3.24702	2.2256	3.32943	3.23758	2.35868	3.16442	3.13195	2.17941	3.08369	3.18546	2.11949
GRMZM2G054905_P01	2.16629	1.67368	1.86011	2.05614	1.65346	1.88414	1.7449	1.31213	1.36823	1.70285	1.39162	1.5203	2.25638	1.78333	2.08033	1.95667	1.73487	1.79684	2.04013	1.69007	1.72287	2.07664	1.76084	1.76718
GRMZM2G065292_P01	2.00453	1.50492	1.21229	2.09802	1.53768	1.29577	2.10018	1.621	1.43054	2.31559	1.7093	1.50835	2.03511	1.55021	1.25776	2.0892	1.59911	1.36398	2.16506	1.70342	1.46742	2.1923	1.77436	1.46389
GRMZM2G070723_P02	2.40089	2.37747	2.8103	2.41936	2.44788	2.74154	2.42646	2.60238	2.78554	2.60945	2.77156	2.96292	2.23755	2.37025	2.70057	2.36657	2.42574	2.64777	2.31922	2.54889	2.68214	2.22051	2.45584	2.66922
GRMZM2G079236_P01	2.6895	2.17258	3.42458	2.62111	2.2195	3.45146	2.5693	2.13499	3.32602	2.52618	2.29223	3.45697	2.64101	2.35161	3.66545	2.5078	2.20572	3.54932	2.73697	2.31936	3.57516	2.70813	2.30401	3.55104
GRMZM2G119482_P01	2.93825	2.47473	1.81127	2.71187	2.42539	1.96332	3.09209	2.5118	2.03316	2.952	2.43237	1.99301	2.699	2.2521	1.69138	2.65659	2.21527	1.70033	2.92479	2.29229	1.86798	3.02541	2.39603	1.93954
GRMZM2G119499_P01	2.68664	2.82322	3.06237	2.62912	3.03383	3.30643	3.09912	3.55497	3.64101	2.84941	3.39313	3.62789	2.59386	2.8645	3.1804	2.70494	2.98656	3.3205	2.96976	3.34227	3.67779	2.46715	3.00152	3.1836
GRMZM2G124307_P01	3.80974	3.90164	3.44649	4.09554	4.07974	4.04141	3.78493	3.88894	3.72315	4.1433	4.26245	3.9774	3.49875	3.63122	3.39279	3.75672	3.95972	3.59655	3.31487	3.62045	3.36861	3.59615	3.65584	3.4536
GRMZM2G128665_P01	2.40309	2.03055	2.23415	2.61902	2.1281	2.43836	2.31629	2.08713	2.19601	2.722	2.11106	2.50967	2.24471	1.93077	2.09379	2.32224	1.96889	2.25243	2.18621	1.83382	2.12471	2.18644	1.90967	2.15088
GRMZM2G321053_P01	3.7694	3.68815	3.71192	2.94208	2.87256	3.00597	3.25699	3.20774	3.45504	2.67508	2.68919	2.83304	3.42633	3.56933	3.7073	3.26504	3.42301	3.34489	2.7764	2.7354	2.91816	2.88868	2.81461	3.02369
GRMZM2G331105_P01	1.21261	1.0019	0.769082	1.1104	1.01799	0.728567	1.06654	0.895103	0.691892	1.03649	0.936272	0.644089	1.23964	1.10343	0.864767	1.16875	1.05276	0.789457	1.08719	0.952265	0.757092	1.07838	1.04028	0.755055
GRMZM2G336908_P01	3.34234	3.81838	3.68951	2.88115	3.1271	3.22828	3.38775	3.7215	3.59025	3.06179	3.41548	3.17305	3.40928	3.82439	4.05708	3.21115	3.67982	3.81079	3.4187	3.69447	3.68018	3.28784	3.71887	3.77086
GRMZM5G817037_P02	3.10478	3.1562	3.22881	2.95348	2.95152	3.19796	2.94097	3.04077	3.15534	3.03889	3.25644	3.14738	2.89003	3.02977	3.11367	2.81285	3.12225	3.00393	3.0331	3.20406	3.12607	3.22589	3.23898	3.02683
GRMZM5G826194_P02	3.10651	3.19682	3.34208	3.30346	3.74688	3.88147	2.29151	2.52477	2.89612	2.56742	2.90748	3.14713	3.252	3.69756	3.9414	3.53737	4.26571	3.91214	2.55677	2.89367	2.98214	2.38496	2.76709	2.89753
AC203535.4_FGP001	2.34336	2.14027	2.05843	2.45749	2.15298	2.19236	2.46639	2.19216	2.20179	2.46803	2.18132	2.22883	2.17699	1.98855	2.02196	2.24635	2.00147	2.06555	2.28337	2.1065	2.04208	2.55802	2.23675	2.189
GRMZM2G003246_P01	2.56954	2.7421	3.51613	2.29709	2.5827	3.37452	2.46731	2.79156	3.42815	2.30773	2.50931	3.06676	2.67696	2.53377	3.44427	2.55138	2.53646	3.29775	2.65854	2.62651	3.41553	2.47146	2.67759	3.45689
GRMZM2G028945_P01	3.08945	3.22698	2.47236	3.668	3.62438	3.10433	2.94872	3.021	2.32849	3.56855	3.3219	3.0767	2.97875	3.08776	2.3942	3.25489	3.34468	2.55226	3.27396	3.23584	2.51243	3.21767	3.13744	2.55923
GRMZM2G033493_P01	2.26103	2.22751	2.2625	2.6881	2.64122	2.71381	2.34078	2.2431	2.20842	2.84427	2.90934	2.78067	2.54084	2.59872	2.68598	2.55399	2.78839	2.70948	3.2337	3.05833	3.109	2.53728	2.53338	2.53014
GRMZM2G044498_P01	1.86663	1.86692	1.49072	1.53339	1.55626	1.1917	2.23834	2.32326	1.98848	1.81094	1.85681	1.48378	2.16232	2.08249	1.69142	1.82413	1.84099	1.51877	2.27956	2.35527	1.84523	2.28469	2.11799	1.78989
GRMZM2G047214_P01	2.75961	2.49724	2.33908	2.84136	2.58605	2.46306	2.92881	2.49083	2.59518	3.11811	2.55375	2.99743	2.68031	2.48893	2.43398	2.78324	2.38184	2.58285	2.93098	2.4317	2.83648	2.9576	2.56966	2.75194
GRMZM2G050270_P01	3.08119	3.62373	2.97342	3.19192	3.8946	3.3503	2.53104	3.17376	2.59288	2.46328	3.40704	2.64515	2.8635	3.37535	2.9022	2.64811	3.58393	2.95875	2.5567	3.31528	2.73745	2.66426	3.62631	2.83985
GRMZM2G050329_P01	3.58749	2.51188	2.67911	3.40658	2.29646	2.30594	3.2695	2.15468	2.2679	3.38392	2.10326	2.21161	3.35048	2.34563	2.47819	3.45338	2.35786	2.46673	3.18145	2.11374	2.28119	3.3672	2.11649	2.30933
GRMZM2G052546_P03	2.68435	2.65486	3.33263	2.55502	2.39615	3.03484	2.73462	2.6447	3.35706	2.80471	2.50766	3.26036	2.81667	2.73224	3.57789	2.76966	2.6223	3.40323	2.83677	2.68952	3.5973	2.79819	2.75257	3.43669
GRMZM2G057450_P01	1.79029	1.88828	2.19634	1.82164	1.83827	2.26255	1.74514	1.78517	1.98537	1.79477	2.02142	2.18676	1.58319	1.68245	2.01135	1.71343	1.9972	2.21486	1.73457	1.74253	1.92853	1.81698	2.04468	2.21423
GRMZM2G068316_P01	2.98245	2.70064	2.38994	2.77811	2.35618	1.99636	3.6036	3.0298	2.53008	3.14267	2.6655	2.35664	3.25407	2.64377	2.36497	3.19555	2.77066	2.34069	3.50096	2.91713	2.5243	3.54258	2.91633	2.49701
GRMZM2G068862_P01	3.23081	3.17446	2.7942	3.32656	3.54439	2.91675	2.98305	3.11285	2.67689	3.33215	3.72434	3.0667	2.85	2.88817	2.44893	3.21558	3.28469	2.68077	2.9358	3.15111	2.67689	3.12605	3.11999	2.73886
GRMZM2G080048_P01	2.51283	2.1472	2.42263	2.67834	2.22203	2.58153	3.08135	2.79146	3.11237	3.35986	2.92909	3.24533	2.61409	2.07537	2.58672	2.77309	2.24354	2.63145	2.9916	2.74996	3.13165	2.98885	2.84135	3.28833
GRMZM2G089308_P01	3.84972	3.90662	3.87162	3.46203	3.54429	3.56662	3.96748	4.03671	4.00544	3.30871	3.67678	3.22921	3.64899	3.54469	3.81291	3.52741	3.84757	3.50867	3.45285	3.64445	3.40344	3.78281	3.79888	3.60208
GRMZM2G101867_P01	2.82657	2.73648	2.22363	2.63884	2.51543	2.06914	2.91873	2.74113	2.26169	2.74954	2.73238	2.17759	2.51615	2.42062	2.02001	2.61829	2.45587	1.99279	2.80203	2.64057	2.07932	2.92985	2.75752	2.17582
GRMZM2G102596_P02	2.50758	3.66756	3.62498	2.56818	3.62736	3.59352	2.48359	3.44714	3.53349	2.63421	3.59146	3.5899	2.36547	3.41519	3.44129	2.42608	3.38934	3.26447	2.42273	3.32974	3.4026	2.59217	3.53222	3.54976
GRMZM2G104546_P02	1.16218	1.71664	1.58878	1.49744	1.74376	1.62069	1.25647	1.77802	1.64887	1.57824	1.47941	1.71171	1.11257	1.62376	1.60822	1.25202	1.62945	1.62457	0.979745	1.46853	1.57307	1.16134	1.56044	1.62409
GRMZM2G124466_P01	2.74658	2.67676	2.67482	2.8111	2.78336	2.6649	2.6553	2.53489	2.65901	2.8089	2.71229	2.90524	3.42936	3.18331	3.01456	3.30334	3.22793	2.88676	3.18669	3.01473	3.18015	3.05874	2.86672	3.01456
GRMZM2G160184_P01	2.83308	2.26865	2.99287	2.8578	2.2894	2.93376	3.02942	2.39343	3.08036	2.87409	2.47132	3.03969	2.81622	2.39716	3.06895	2.8769	2.45103	2.93288	2.89235	2.43331	2.99784	2.82016	2.2957	2.95366
GRMZM2G348873_P01	2.84483	2.72421	2.80194	2.51969	2.18456	2.43918	3.09988	2.99537	2.94268	2.71538	2.3598	2.40016	2.89405	2.81075	2.75646	2.78279	2.60872	2.63617	2.93194	2.69071	2.46932	3.21144	2.62587	2.55409
GRMZM2G380184_P01	1.05663	1.08605	1.28868	1.23175	1.22918	1.54488	1.03158	1.01136	1.23413	1.15714	1.23045	1.39544	1.09415	1.08974	1.40158	1.15317	1.13105	1.40862	1.13736	1.09376	1.38487	1.13822	1.12841	1.3418
GRMZM5G844562_P01	2.65471	3.5037	3.52678	2.64527	3.55651	3.70222	2.85035	3.81381	3.62566	3.26375	4.27384	4.1144	2.32146	3.05821	3.30102	2.3595	3.28184	3.22978	2.93184	3.61605	3.63169	2.97313	3.89604	3.86844
GRMZM5G855672_P02	4.12069	2.66865	2.94771	4.61081	2.84545	3.21713	5.25364	3.47722	3.6294	4.5776	3.194	3.28623	5.03613	3.19027	3.72985	5.02843	3.1956	3.4044	4.98995	3.52095	3.45201	4.38276	2.90786	3.33327
AC217401.3_FGP002	3.31265	2.26109	2.3899	3.15951	2.21179	2.35849	2.94537	2.10379	2.196	2.89378	1.98616	2.16238	2.87107	2.11938	2.26522	2.90871	2.04922	2.19968	2.93239	2.06481	2.17489	2.97652	2.20376	2.25344
GRMZM2G010987_P01	2.94935	2.99119	3.09931	2.95803	3.18233	3.31823	2.75803	2.84063	2.87281	2.88278	3.02275	3.21019	2.59132	2.67383	2.91956	2.65152	2.84243	3.08194	2.54067	2.59058	2.65452	2.66831	2.85625	2.84343
GRMZM2G024738_P04	3.27598	3.15453	3.29747	3.21741	3.33566	3.75652	3.25281	3.38323	3.5694	3.40729	3.4434	3.99243	2.72532	2.82975	2.82731	3.0861	2.97466	3.17732	3.03493	2.92489	3.25136	3.00017	2.95387	3.12819
GRMZM2G030915_P03	8.90925	6.65964	5.76872	10.55	7.82403	6.83869	10.2756	8.40356	7.11065	11.9217	8.63311	7.79976	9.17463	6.9371	6.08793	9.87575	7.3962	6.21181	9.75561	7.49733	6.32186	10.5374	7.64904	6.86059
GRMZM2G068982_P01	3.02697	3.02217	3.04718	2.78492	2.72395	2.76193	2.31057	2.21717	2.28295	2.22349	2.22164	2.12846	2.97216	3.05882	3.11317	2.95176	3.13062	2.99609	2.3401	2.26842	2.31306	2.39003	2.3572	2.35716
GRMZM2G074857_P02	2.52298	3.09693	3.1578	2.84255	3.43352	3.64595	2.80921	3.3496	3.6316	2.86636	3.60658	3.55444	2.71898	3.27245	3.36537	2.9215	3.53434	3.7805	2.6854	3.40831	3.39343	2.63301	3.29827	3.47091
GRMZM2G075320_P01	1.63007	1.69807	1.59654	1.6678	1.48511	1.42403	1.9121	1.49369	1.55368	1.84251	1.43842	1.51537	1.68666	1.40651	1.41371	1.68464	1.55657	1.41386	1.73263	1.44398	1.48628	1.8436	1.47765	1.59654
GRMZM2G095333_P01	3.35449	2.71252	2.90014	2.8172	2.78902	2.93722	4.21833	3.42264	3.86928	3.30095	3.08848	3.29321	3.13814	2.84334	3.17039	3.0955	2.9625	3.09743	3.33146	3.05663	3.27162	3.74392	3.12488	3.46071
GRMZM2G107116_P02	2.09641	2.0086	2.24028	1.96967	1.96217	2.28642	2.0856	1.99577	2.31765	2.04384	1.93672	2.32417	2.15541	2.00199	2.41342	2.13941	1.94915	2.33722	2.26865	2.02996	2.50174	2.24101	2.11563	2.5791
GRMZM2G117300_P01	2.83847	3.31326	3.05946	2.66273	3.26888	2.97478	2.95827	3.4335	3.0668	2.97636	3.32121	2.90661	2.43556	3.10227	2.89958	2.7636	3.40667	3.16768	2.61611	3.11519	2.89438	2.74891	3.03901	3.03072
GRMZM2G156365_P04	2.726	2.33473	2.12153	2.80166	2.35208	2.29724	3.1851	2.58035	2.50117	3.1443	2.69275	2.49665	2.07422	1.86501	1.74554	2.21609	1.94989	1.86613	2.37822	2.04494	1.94624	2.47442	2.18024	2.02549
GRMZM2G158097_P02	2.84435	2.66559	2.5097	2.35954	2.12361	2.20553	2.95103	2.82979	2.64916	2.6134	2.45926	2.45059	3.13758	3.05087	2.8879	2.81782	2.75734	2.48873	3.15741	3.12143	2.93742	3.11887	2.99211	2.87097
GRMZM2G169593_P01	1.96845	2.54781	2.50183	2.25077	3.00459	3.03975	2.69279	3.34418	3.35647	3.025	3.9394	4.05249	1.91755	2.3524	2.43471	2.06763	2.64976	2.61444	2.65171	3.22099	2.98746	2.42609	2.94087	3.01285
GRMZM2G179521_P01	2.9817	3.00804	3.44163	2.97446	2.85635	3.47377	3.19037	3.14555	3.57223	3.1385	3.0973	3.48266	3.29139	3.33191	3.84675	3.47774	3.37473	4.01461	3.5079	3.57165	4.08196	3.43794	3.61447	4.0864
GRMZM2G436092_P05	2.51036	2.5115	2.65589	2.46536	2.53457	2.64971	2.59911	2.60579	2.99097	2.54818	2.74468	2.71748	2.04928	2.22307	2.42247	2.07326	2.29327	2.35631	2.2342	2.51429	2.51121	2.52025	2.57284	2.69596
GRMZM2G466780_P01	2.58963	2.64459	2.39692	2.8685	2.7502	2.55071	2.63844	2.19242	2.06948	2.84985	2.48246	2.36049	2.38315	2.33769	2.13052	2.55672	2.36843	2.35457	2.51093	2.02658	2.07658	2.60279	2.19763	2.06073
GRMZM5G881950_P02	2.35987	2.85931	3.23225	2.48672	2.99711	3.3352	2.23396	2.75574	3.08411	2.40613	2.7934	3.32875	2.36338	2.88099	3.20385	2.25779	2.9954	3.321	2.47668	2.79854	3.12768	2.41547	2.91951	3.36715
GRMZM2G013783_P01	2.60927	2.34157	1.94105	2.443	2.20398	1.87532	2.64708	2.443	2.01462	2.78279	2.69024	2.11114	2.6665	2.36881	2.09897	2.52561	2.18544	1.9332	2.56343	2.35308	1.97008	2.76233	2.41389	2.05562
GRMZM2G018786_P03	2.9665	2.83166	2.99607	2.92565	2.82883	2.91917	2.65982	2.43348	2.49976	2.77811	2.45865	2.65737	3.48018	3.22786	3.43544	3.33659	3.14896	3.20152	3.04942	2.6221	2.78798	2.80371	2.44847	2.50269
GRMZM2G019404_P01	20.3424	20.6403	23.0799	17.3926	19.0156	20.0842	21.9008	23.2687	23.2938	19.2054	21.0189	22.57	20.4736	22.5613	24.2294	19.1697	21.6246	21.3521	22.0559	22.7344	24.4502	21.4595	24.1362	23.9403
GRMZM2G020775_P01	2.78968	2.88954	2.50824	2.53483	2.57222	2.22078	2.7626	2.6329	2.33367	2.50629	2.36624	2.15709	2.90764	2.77513	2.53497	2.73085	2.64682	2.41733	2.87065	2.49873	2.36538	2.89745	2.61842	2.46254
GRMZM2G059590_P01	0.658423	0.422438	0.778087	0.665629	0.392606	0.75878	0.596931	0.332511	0.676625	0.602118	0.363248	0.776577	0.632897	0.400478	0.794216	0.612018	0.383909	0.80089	0.592688	0.342232	0.71802	0.639295	0.362579	0.696806
GRMZM2G074589_P01	2.55259	2.49499	2.80065	2.55953	2.52179	2.57557	2.35559	2.39145	2.36209	2.49274	2.50618	2.50764	2.56877	2.55171	2.81278	2.45807	2.63418	2.75213	2.53769	2.44868	2.62193	2.47502	2.45102	2.56721
GRMZM2G075488_P02	1.64995	2.53076	2.74834	1.73444	2.57589	2.90817	1.51467	2.19881	2.34217	1.5509	2.34076	2.44459	1.67586	2.35515	2.7947	1.66265	2.46125	2.74672	1.61863	2.191	2.53542	1.59289	2.34637	2.47989
GRMZM2G081268_P01	4.06618	3.59034	3.59259	3.24238	2.80851	2.94607	4.58796	3.8735	3.75565	3.73956	3.29399	3.17763	4.41941	4.0434	4.03002	3.72021	3.45819	3.42382	4.24118	3.50984	3.59509	3.98311	3.42222	3.47913
GRMZM2G121022_P03	1.43005	1.30397	1.5458	1.73741	1.61948	1.92691	1.2991	1.21392	1.37528	1.6029	1.46022	1.74416	1.48648	1.3138	1.5444	1.61529	1.45773	1.69496	1.46824	1.36152	1.64591	1.36052	1.26937	1.52259
GRMZM2G124532_P03	1.85065	1.7294	1.80963	1.77881	1.57742	1.59628	1.6788	1.48257	1.52245	1.56461	1.54304	1.49737	1.85821	1.69607	1.74534	1.7272	1.60757	1.63796	1.75026	1.63031	1.60317	1.79147	1.73363	1.5878
GRMZM2G134480_P01	2.77624	1.90783	2.88412	3.14475	2.12904	3.04083	2.80627	1.87416	2.75814	3.04259	2.26644	3.0662	2.65444	1.79655	2.75166	2.80599	2.0166	2.88497	2.83855	1.92622	2.73897	2.93117	2.08317	2.87511
GRMZM2G141760_P01	1.59229	1.79184	1.83184	1.63357	1.87329	1.89601	1.6375	1.84122	1.92135	1.6542	1.9132	1.85846	1.60505	1.82445	1.8632	1.57213	1.82464	1.87085	1.62049	1.88003	1.84697	1.68476	2.05133	1.91133
GRMZM2G150190_P01	2.32616	3.0362	2.54166	2.27938	3.28341	3.22559	2.57528	3.26859	3.18385	2.43008	3.78643	3.28696	2.15302	3.29497	3.09981	2.31769	3.37678	3.04452	2.53549	3.91774	3.65187	2.38288	3.0359	2.96573
GRMZM2G165931_P01	1.44289	1.21419	1.46988	1.52042	1.19818	1.52006	1.17095	0.99854	1.18979	1.30581	1.04	1.245	1.42433	1.20176	1.59741	1.49354	1.2511	1.51531	1.33135	1.02638	1.25636	1.31071	1.06986	1.20618
GRMZM2G175867_P01	2.14143	1.83303	1.80645	2.44476	1.95518	1.95181	2.2496	1.87192	1.80861	2.6762	2.26504	2.20641	2.04536	1.78428	1.77824	2.22434	1.67417	1.86251	2.03975	1.72731	1.75057	2.17857	1.88908	1.83538
GRMZM2G177895_P01	3.06954	3.17676	3.35613	2.65699	2.75271	2.63068	3.53623	3.48225	3.16913	2.84149	3.06514	2.62718	3.39902	3.39903	3.45423	2.75531	3.16884	3.28501	3.52783	3.54368	3.24787	3.21359	3.41158	3.22977
GRMZM2G339699_P01	2.41083	2.81492	3.53674	1.99845	2.36503	2.86241	2.43255	2.74381	3.08296	2.11436	2.26842	2.74049	2.32348	2.86762	3.49496	2.04506	2.57864	3.01036	2.37862	2.61009	3.12098	2.29664	2.75146	3.15111
GRMZM2G372297_P01	2.7047	2.49781	2.27989	2.38043	2.14588	1.92198	2.8746	2.55834	2.37131	2.65052	2.48105	2.19919	2.78638	2.50306	2.24501	2.56367	2.35649	2.0574	3.13761	2.78496	2.49281	2.9021	2.6724	2.4324
GRMZM2G405459_P01	2.88186	3.34696	3.23673	2.83874	2.96777	2.8977	3.63694	4.02456	4.1158	3.20314	3.60231	3.42247	2.88481	3.41538	3.26027	2.73066	3.23914	3.03604	3.432	3.74784	3.46827	3.39184	3.65605	3.56273
GRMZM2G437977_P01	2.31285	2.84647	3.13279	2.5137	3.13919	3.42582	2.46494	3.37337	3.27605	2.91673	4.01942	3.89529	2.05721	2.60224	2.94612	2.16747	2.87161	2.97713	2.22853	2.968	3.1179	2.33857	3.1797	3.22891
GRMZM2G443985_P01	2.85588	3.96175	2.71955	2.7509	3.50051	2.71556	2.65633	3.57434	2.62999	2.68034	3.27007	2.66536	2.84547	4.09449	2.94687	2.80817	3.81185	2.89953	2.73413	3.3659	2.7244	2.66877	3.42109	2.69873
GRMZM5G853305_P01	3.62536	3.60269	3.31968	3.13663	3.27936	3.14695	3.09207	3.16047	2.8035	3.37939	3.64075	3.11616	3.41112	3.38557	3.26612	3.1352	3.22644	3.07297	2.63756	2.85163	2.60734	2.58267	2.85308	2.66726
GRMZM5G866758_P02	4.24908	3.21072	3.77413	4.04477	3.26636	3.72844	2.85433	2.45907	2.38349	2.79304	2.63657	2.52695	4.00981	3.14449	3.65086	3.4853	3.1602	3.39796	2.75846	2.46624	2.25066	2.80522	2.65637	2.2875
GRMZM2G003096_P01	2.93372	2.77148	3.04148	2.43076	2.34881	2.38706	3.43073	3.25647	3.38508	2.86869	2.7024	3.00403	2.86691	2.72834	3.14821	2.77606	2.66913	2.86547	3.30128	3.28861	3.54985	3.39184	3.23476	3.61882
GRMZM2G009320_P02	3.18019	2.0747	2.1439	2.57802	1.80331	1.68909	3.7055	2.58152	2.55129	2.78428	1.96381	2.02951	3.5721	2.48773	2.56107	3.31451	2.2484	2.28657	3.71134	2.60556	2.52237	3.15406	2.23497	2.21619
GRMZM2G030235_P01	2.45371	2.32402	2.83046	2.79156	2.71384	3.29141	1.73829	1.54146	2.03097	2.16587	1.89387	2.45781	2.41669	2.36999	2.91675	2.71899	2.76003	3.16356	1.93222	1.71969	2.22791	1.78267	1.67711	2.08114
GRMZM2G044247_P01	2.30482	2.98861	3.01557	2.30972	2.59071	2.74088	2.75123	3.30445	3.62932	2.70615	2.85387	3.34798	2.32319	2.71639	2.83637	2.36877	2.53555	2.77805	2.55791	2.88268	3.23768	2.67821	3.12773	3.41416
GRMZM2G065494_P01	1.9719	2.33749	2.12947	2.36822	2.6648	2.65915	1.59101	1.78206	1.60408	1.88904	2.18971	2.03182	1.77651	2.05252	1.99426	2.01897	2.25531	2.14085	1.67328	1.76848	1.68821	1.71105	1.94963	1.75217
GRMZM2G066290_P01	1.6969	1.92225	1.72554	2.01368	2.56964	2.1584	1.72683	1.85776	1.81343	2.18202	2.43668	2.45602	1.56651	1.78132	1.57905	1.62786	1.88033	1.81754	1.53826	1.75135	1.70571	1.64792	1.80067	1.7443
GRMZM2G097775_P01	2.35328	1.43972	1.40857	1.90107	1.25444	1.17698	2.59329	1.6949	1.79519	2.18537	1.43604	1.42657	1.91598	1.16996	1.22289	1.72547	1.14656	1.14761	2.09813	1.34391	1.3166	2.2274	1.51448	1.50559
GRMZM2G103843_P01	1.78801	1.47355	2.37775	1.95885	1.53301	2.63592	1.7587	1.43415	2.31357	1.89375	1.45536	2.59736	1.65602	1.26925	2.24061	1.73838	1.38931	2.43192	1.54596	1.20234	2.15788	1.66033	1.24303	2.245
GRMZM2G106748_P01	0.783751	0.99158	0.835206	0.800637	0.94238	0.839051	0.62107	0.740069	0.629452	0.673293	0.785038	0.631088	0.848988	0.957435	0.883065	0.842481	0.952613	0.859176	0.673375	0.800978	0.648923	0.756404	0.829908	0.674039
GRMZM2G122999_P01	2.83393	2.18938	2.07598	2.91054	2.11442	2.13755	2.93891	2.27942	2.10269	3.01637	2.47764	2.30056	2.74484	2.18217	2.02484	2.76243	2.12425	2.04404	2.88018	2.26478	2.12857	2.91281	2.36793	2.18576
GRMZM2G139341_P01	2.6322	2.52827	2.04306	2.77994	2.66815	2.24157	2.38466	2.38023	1.86412	2.73538	2.62193	2.21463	2.59859	2.47909	2.17189	2.71923	2.57053	2.29883	2.57149	2.29571	2.09379	2.57852	2.4561	2.07211
GRMZM2G150796_P01	2.46737	2.3285	2.69349	2.27068	2.06125	2.37043	2.35126	2.23216	2.4081	2.22238	2.15097	2.21633	2.5537	2.43431	2.85953	2.41957	2.29915	2.58076	2.41032	2.18079	2.49934	2.30471	2.31288	2.37202
GRMZM2G158872_P01	1.44115	0.861301	1.35386	1.47237	0.900576	1.38565	1.531	0.871591	1.36722	1.59901	0.92896	1.42305	1.39234	0.852211	1.36335	1.46372	0.790812	1.31901	1.48204	0.914725	1.37243	1.61836	0.879824	1.41543
GRMZM2G166345_P02	2.65745	2.52251	3.23336	2.6897	2.56621	3.44964	2.72196	2.59212	3.44699	2.61145	2.56316	3.22375	2.4827	2.3673	3.13101	2.48112	2.44351	3.15983	2.60749	2.42979	3.01541	2.74813	2.5154	3.34001
GRMZM2G174619_P02	3.13983	3.10678	2.65456	3.26682	3.23013	2.75986	2.96374	3.07807	2.55721	3.05952	3.32919	2.52043	2.81342	2.9216	2.63366	2.89646	3.04337	2.70853	2.84039	2.9746	2.52123	3.01981	3.31626	2.64451
GRMZM2G176840_P01	2.29922	2.52779	2.40898	2.19712	2.46756	2.29966	2.24075	2.44637	2.34377	2.04825	2.45326	2.20779	2.53827	3.05024	3.14273	2.39682	2.95019	2.68701	2.22366	2.72381	2.53915	2.0559	2.38078	2.37092
GRMZM2G376731_P01	1.68961	1.78706	2.13972	1.98971	2.03066	2.43059	1.3866	1.61487	1.75112	1.60368	1.98007	2.10975	1.63715	1.78535	2.16822	1.79388	2.07648	2.43101	1.50906	1.82677	1.97761	1.39031	1.89874	1.99197
GRMZM2G472376_P02	3.30205	2.66132	2.99942	3.14585	2.51183	2.96017	2.34271	1.81526	2.12737	2.31063	1.9371	2.15037	2.68526	2.28486	2.78202	2.70867	2.27651	2.65232	2.18394	1.75682	2.13044	2.3209	1.7563	2.1979
GRMZM5G879235_P01	2.64915	2.87963	1.9819	2.94161	3.30125	2.36067	2.21548	2.46643	1.65365	2.65921	3.02965	2.09768	2.43033	2.67361	1.7938	2.68332	2.95159	1.9477	2.21601	2.30017	1.60117	2.20489	2.39766	1.56343
GRMZM2G000256_P01	2.97309	2.40613	3.16083	2.9728	2.56694	3.24207	3.18159	2.57107	3.3539	2.9142	2.5211	3.1997	2.88062	2.44227	3.25641	2.83351	2.49272	3.25737	3.07174	2.58271	3.16115	3.17246	2.41705	3.36856
GRMZM2G009070_P01	2.55088	2.18696	2.57661	2.71402	2.39066	2.57139	2.50734	2.07237	2.20063	2.66943	2.2725	2.59702	2.36204	2.00067	2.25189	2.44676	2.10565	2.34819	2.34106	1.935	2.15385	2.40847	2.03618	2.30041
GRMZM2G009785_P01	2.01515	2.51383	2.33052	1.78163	2.23247	2.08359	2.60329	3.32848	3.23857	2.37155	3.03912	2.95886	2.15522	2.65389	2.55089	1.92743	2.4282	2.28817	2.56418	3.4256	3.31035	2.58156	3.37841	3.23905
GRMZM2G019500_P01	2.17763	2.96745	2.54533	2.84114	2.52631	2.67528	2.30542	2.56649	2.12352	2.34843	2.48283	2.02157	2.34235	2.4055	2.34423	2.36446	2.53181	2.38692	2.2199	2.66941	1.93105	2.40066	2.85021	1.97211
GRMZM2G028700_P01	2.26262	2.76289	2.22109	2.44489	2.38207	2.17838	2.40444	2.32139	2.03161	2.41528	2.74669	2.11022	2.49521	2.4443	2.41148	2.46078	2.59498	2.40898	2.75983	2.82048	2.28493	2.75694	2.92719	2.35332
GRMZM2G059121_P01	2.70949	2.50906	2.59726	2.83598	2.71549	2.76437	3.19874	2.90302	2.97993	3.41073	3.11244	3.12137	2.7958	2.52273	2.73058	2.83086	2.65704	2.86416	3.18445	2.83065	3.05537	3.03395	2.74956	2.88695
GRMZM2G061950_P01	2.63068	2.37366	2.25226	3.18634	2.87693	2.70891	2.03566	1.89091	1.7382	2.63901	2.61515	2.3416	2.49088	2.38463	2.35872	2.61882	2.62995	2.46473	2.35109	2.16557	2.14371	2.04752	2.0632	1.99187
GRMZM2G065532_P01	1.89285	2.20352	1.8641	1.91417	2.10148	1.89368	1.64459	2.12688	1.83297	1.66646	2.10302	1.84373	1.67061	2.08557	1.81722	1.73006	2.13328	1.92481	1.72464	2.03124	1.8397	1.75662	2.21501	1.98379
GRMZM2G071441_P01	0.973453	1.98013	1.45655	1.03777	2.06901	1.51185	0.988998	1.88341	1.4036	1.01766	2.02183	1.50359	0.968207	2.01713	1.56082	1.03718	2.09564	1.59032	0.976368	1.95487	1.51672	1.00036	1.97797	1.45655
GRMZM2G086882_P01	2.55355	2.23435	2.32	2.73717	2.76128	2.63431	2.6044	2.73009	2.81167	2.66584	2.73789	2.9054	2.53355	2.48624	2.4539	2.74464	2.58619	2.56994	2.83766	2.93141	2.69773	2.32319	2.53255	2.60706
GRMZM2G091189_P01	3.202	2.59104	3.1573	3.76214	2.9828	4.02826	4.20786	3.27017	4.5759	4.43262	3.67051	4.74688	2.651	2.2235	2.67008	2.9142	2.49916	2.95226	3.28175	2.93386	3.25083	3.54843	2.82896	3.61849
GRMZM2G092451_P02	1.56018	1.752	1.4894	1.5092	1.67335	1.46037	1.48386	1.82425	1.48154	1.57945	1.9068	1.66826	1.40192	1.61495	1.40065	1.42726	1.63732	1.39022	1.46034	1.77224	1.55078	1.57779	1.8191	1.55879
GRMZM2G093945_P01	2.43928	3.89791	3.34648	2.37719	3.58999	3.05092	2.54932	3.98044	3.42933	2.45265	3.8364	3.17684	2.92436	4.12019	3.77683	2.57178	4.02637	3.20478	2.94202	4.24398	3.44741	2.7434	4.30471	3.56741
GRMZM2G105466_P01	2.10102	2.11196	2.35774	2.37762	2.16569	2.53487	1.83951	2.15365	2.42979	1.94214	2.27738	2.50535	1.77824	2.01631	2.20212	1.82772	2.10193	2.15634	1.49295	2.06692	2.34723	1.64081	2.10616	2.46657
GRMZM2G110289_P01	2.67665	2.46948	2.38971	2.7848	2.28707	2.32304	1.98465	1.84329	1.81491	2.06298	1.84065	1.86065	2.47309	2.28587	2.3772	2.55657	2.42123	2.35963	2.23619	1.90545	1.88255	2.22507	1.94697	1.99231
GRMZM2G113202_P01	1.60698	1.35479	1.324	1.5485	1.27614	1.22495	1.5191	1.18299	1.20388	1.3574	1.16568	1.14604	1.60924	1.31171	1.36977	1.5464	1.3003	1.33111	1.4456	1.17212	1.19207	1.36677	1.23628	1.20818
GRMZM2G122793_P01	3.08442	3.41465	3.3782	2.66032	2.96745	3.13251	3.36696	3.77363	3.98096	2.76251	3.34259	3.22273	3.1235	3.49345	3.77414	2.94616	3.22675	3.40145	3.10787	3.54565	3.67177	2.94826	3.23584	3.43823
GRMZM2G122937_P03	1.36639	0.957074	1.08313	1.57515	1.02433	1.24211	2.1228	1.36621	1.69243	2.00304	1.4442	1.66092	1.67317	1.13913	1.38367	2.24105	1.56274	1.83332	2.80593	2.04819	2.31581	2.21248	1.45812	1.78861
GRMZM2G143246_P01	2.50743	2.68893	2.64845	2.61525	2.97041	2.74904	2.42556	2.6763	2.62943	2.70361	2.86743	2.84703	2.37913	2.69031	2.49783	2.46949	2.76582	2.55568	2.42231	2.64857	2.56975	2.47722	2.69223	2.50278
GRMZM2G154007_P01	3.48168	3.25507	3.30841	3.53724	3.39658	3.46132	2.85279	2.54818	2.4918	2.93363	2.68739	2.72963	3.01874	2.71982	2.75305	3.0312	2.81547	2.76346	2.59034	2.24255	2.17427	2.55437	2.33493	2.31807
GRMZM2G180283_P01	2.94753	3.95547	3.54862	3.04476	4.19474	3.78968	2.26635	3.19729	2.81384	2.67683	3.58836	3.16293	2.26488	2.98038	2.68258	2.64846	3.50168	3.14111	2.04796	2.65442	2.34933	2.10323	2.92765	2.51191
GRMZM2G431708_P02	2.37736	1.92047	1.72181	2.35662	1.92125	1.75406	2.44005	2.20937	1.88876	2.50988	2.23999	1.99018	2.49444	2.01839	1.83727	2.3845	1.96182	1.75735	2.72376	2.31997	1.98914	2.71339	2.40873	2.06143
GRMZM2G442658_P02	2.74105	2.76158	2.28323	3.14895	3.41015	3.08022	2.30597	2.41917	2.1108	2.73181	2.66148	2.38504	1.88119	2.08206	1.6542	2.00176	2.27836	1.80183	2.02393	2.05557	1.73427	2.16535	2.33162	1.95041
GRMZM2G446253_P01	6.80134	8.33866	8.51947	6.56014	7.77294	7.46079	5.82616	7.03519	6.97906	5.69031	7.31505	6.47393	7.22551	8.89069	9.03106	6.57193	8.53808	8.10956	6.16508	7.51276	7.05088	6.15953	7.59663	7.37526
GRMZM2G329047_P01	2.71817	1.67394	2.1558	2.29652	0.909319	1.05401	3.02927	1.27669	1.46137	2.43242	2.0152	1.23217	2.68398	1.70399	1.94482	2.02303	1.67144	1.527	4.3016	2.35629	2.31611	3.51501	2.39313	2.30872
AC210013.4_FGP011	2.2859	2.01422	2.08909	2.1351	2.12282	2.07293	2.25985	2.07728	2.25989	1.94427	2.01593	1.977	1.86443	1.92251	1.90681	1.94957	1.96376	1.95743	1.71935	1.74699	1.78579	1.84155	2.1365	1.95105
AC231747.1_FGP001	1.81988	1.43914	1.17911	1.86217	1.50223	1.18339	1.65794	1.33752	1.09294	1.69607	1.32919	1.0733	1.75445	1.35865	1.14519	1.72463	1.37389	1.1096	1.7333	1.29958	1.10056	1.75156	1.3598	1.11591
GRMZM2G003501_P01	3.79896	2.33704	2.74631	5.60075	3.67332	4.35375	3.49118	2.17253	2.54235	5.60038	3.61166	4.36321	3.06912	1.79024	2.21513	3.68015	2.31819	2.77413	3.39802	1.9936	2.45081	3.36143	2.10343	2.55432
GRMZM2G028156_P01	2.20457	1.9161	2.24888	2.17837	1.8626	2.21894	2.20414	1.92143	2.35871	2.19028	1.97188	2.33729	1.98797	1.82053	2.18671	2.00747	1.76247	2.21411	2.09606	1.80168	2.17151	2.13115	1.94332	2.26384
GRMZM2G031825_P01	2.24326	2.79573	2.77863	2.23674	2.94888	3.06872	2.37612	2.9956	3.24002	2.26413	3.08158	3.15336	2.1752	2.73076	2.89254	2.05625	2.71224	2.84061	2.26979	2.83692	2.9155	2.37852	2.89829	3.11061
GRMZM2G040843_P01	2.00218	1.71844	1.85971	2.27619	2.14892	2.26237	1.84995	1.61639	1.70948	2.08871	1.86971	2.03209	2.0142	1.65058	1.82397	2.09091	1.88801	1.96712	1.87759	1.60603	1.78618	1.80028	1.50191	1.55907
GRMZM2G044819_P03	1.72574	2.45198	2.44153	1.74052	2.5156	2.52651	1.74946	2.53697	2.44545	1.8098	2.57381	2.69695	1.65372	2.32844	2.31444	1.67658	2.39868	2.40553	1.811	2.64062	2.6132	1.83317	2.55391	2.55639
GRMZM2G063676_P01	9.14222	10.4711	10.8568	9.52627	11.1747	11.3453	10.2854	11.8922	12.261	10.5221	12.5582	12.4381	9.23778	10.8851	11.7747	9.18687	11.4096	11.401	10.1238	12.288	12.331	9.97552	12.3212	12.5921
GRMZM2G096153_P01	1.65559	2.07012	2.08818	1.96267	2.33046	2.47363	2.0677	2.52372	2.79782	2.59062	3.20212	3.43342	1.74598	2.2905	2.36917	1.98208	2.5111	2.51595	2.73174	3.35669	3.38163	2.26363	2.71529	2.94019
GRMZM2G099056_P01	0.902456	1.20593	0.946313	0.972764	1.3655	1.15622	0.83001	1.19891	0.928966	0.908016	1.36441	1.1127	0.853104	1.1362	0.933521	0.904423	1.24588	1.01541	0.797593	1.24286	0.955131	0.831635	1.24031	0.95174
GRMZM2G113325_P01	2.31699	2.50098	2.54025	2.38436	2.54386	2.64952	2.31221	2.53548	2.49679	2.54983	2.82163	2.67799	2.26259	2.53574	2.65537	2.29855	2.59408	2.59666	2.50886	2.80387	2.79717	2.36661	2.66435	2.58625
GRMZM2G118003_P03	1.91724	3.45888	2.71639	1.93981	3.73932	2.72133	2.11771	3.70579	2.93971	2.2486	4.25375	3.18665	1.55373	2.98251	2.44939	1.66844	3.25038	2.62546	1.7683	3.12046	2.63151	1.78617	3.48891	2.72957
GRMZM2G136803_P02	2.02955	2.30542	2.01639	1.7706	1.8521	1.65945	1.80007	2.19521	1.86219	1.67547	1.94452	1.6974	2.09439	2.3544	2.16001	1.97955	2.04364	1.84222	1.81877	2.17534	1.92311	1.83158	2.12936	1.83922
GRMZM2G140288_P01	2.23981	1.95663	1.6634	1.87415	1.79022	1.48682	2.17686	2.15672	1.75664	1.97533	2.11569	1.6028	2.28692	2.17439	1.96188	2.00301	2.11716	1.6957	2.24404	2.28022	1.96257	2.19989	2.40898	1.8702
GRMZM2G164868_P01	0.88565	0.995084	0.712494	1.05069	1.21221	0.876256	1.33221	1.4419	1.23567	1.68296	1.8326	1.57646	0.827366	0.929642	0.765318	0.833446	0.902562	0.743041	1.17082	1.31739	1.00858	1.21686	1.36861	1.08219
GRMZM2G165694_P01	1.94357	2.96356	3.05842	2.11903	3.11124	3.1812	1.89038	2.77193	2.93595	1.98275	3.16281	3.32404	1.7045	2.57708	2.77306	1.86956	2.9999	3.01215	1.71453	2.61781	2.82582	1.77567	2.79567	2.88937
GRMZM2G315931_P01	2.4565	1.86006	2.10324	2.19037	1.7316	2.00746	3.17409	2.18869	2.40481	2.85152	2.17597	2.40586	2.49845	1.90854	2.11098	2.50175	1.86412	2.08463	3.14943	2.12639	2.42802	3.1779	2.14464	2.455
GRMZM2G355752_P01	5.47285	3.49435	3.18044	9.72159	6.22942	5.94698	2.25568	1.09435	0.981626	2.77462	1.31591	1.15542	4.38068	2.26437	2.26573	5.72222	3.43631	3.48414	2.24621	1.03407	0.976781	2.42614	1.13122	1.00888
GRMZM2G356938_P01	2.32274	2.36438	2.69394	2.65481	2.69751	3.20567	2.2639	2.42807	2.99537	2.78519	2.96364	3.44228	2.32875	2.465	2.91187	2.44843	2.62861	3.08651	2.60511	2.68615	3.35822	2.59107	2.76665	3.30614
GRMZM2G357620_P01	2.05144	3.02623	2.6156	2.07301	2.96141	2.77505	1.58907	1.89598	1.72125	1.48529	1.90315	1.73632	2.08056	2.92528	2.56935	2.103	2.83322	2.63757	1.8374	2.16241	1.93155	1.78023	2.29233	2.01332
GRMZM2G363474_P01	2.32399	1.95802	1.97011	2.35513	2.07023	2.07343	2.35746	1.98023	1.9478	2.57937	2.16219	2.13644	2.27008	1.72457	1.95485	2.19781	1.94918	1.97226	2.32841	2.04527	1.9478	2.58774	2.11032	1.99731
GRMZM2G377797_P01	2.37604	2.07527	2.07866	2.86199	2.38595	2.50396	2.22103	1.86865	1.9297	3.08486	2.96291	2.62478	2.19013	2.02608	2.1013	2.5522	2.37234	2.42842	2.42229	2.22956	2.21387	2.29145	2.07925	2.11929
GRMZM2G393002_P01	0.906626	0.684045	0.860651	0.920407	0.632226	0.752758	0.844467	0.562927	0.707104	0.841616	0.633533	0.727878	0.826219	0.61626	0.758152	0.890373	0.639796	0.753965	0.921548	0.602359	0.722242	0.848744	0.628854	0.71725
GRMZM2G415491_P01	7.27255	6.03138	5.64781	8.04372	6.9591	6.61169	7.07994	6.38585	5.62944	9.08512	8.92882	7.38957	6.61422	5.27968	5.24595	6.98004	5.60358	5.74368	6.37273	5.74109	5.30967	6.55169	6.0705	5.42219
GRMZM2G416388_P06	2.88709	2.22343	2.46911	3.12101	2.47105	2.54744	3.11262	2.55292	2.92487	3.03483	2.57847	2.7268	3.22398	2.56536	2.81411	3.11905	2.2924	2.58237	3.23853	2.75237	2.90441	3.26288	2.564	3.03089
GRMZM2G427815_P01	4.72849	4.72233	5.20444	4.14818	3.96256	4.48999	2.37096	2.19121	2.38097	2.4003	2.28887	2.25181	3.97911	3.81224	4.44458	3.39035	3.49004	3.71299	2.43809	2.21371	2.14838	2.54451	2.31903	2.36685
GRMZM2G443814_P01	0.888841	0.820717	0.634203	0.87156	0.643155	0.551473	0.917003	0.769231	0.664372	0.90155	0.75722	0.616528	0.820813	0.760739	0.630881	0.725995	0.639789	0.505489	0.984208	0.868837	0.728231	0.89003	0.740313	0.668824
GRMZM2G469111_P01	2.1539	2.52956	2.25765	2.36646	2.74906	2.38871	2.27006	2.64785	2.19907	2.55135	3.02619	2.53562	1.96748	2.25626	2.06471	2.04587	2.47321	2.02969	2.38315	2.60425	2.27263	2.26172	2.71362	2.25193
GRMZM2G402936_P01	3.44547	2.84867	3.21819	3.47167	2.86744	2.83168	2.71115	2.65505	2.60607	3.2255	3.05958	3.20625	3.28114	2.79595	3.90164	3.3578	3.0569	3.3854	3.44029	2.83735	3.69395	3.06699	2.87906	3.15681
GRMZM2G015033_P01	3.78274	3.45282	3.63995	3.57112	3.19053	3.45653	3.30784	2.90535	3.2031	3.05068	2.61335	3.04046	3.62584	3.26566	3.41532	3.49152	3.19019	3.33	3.10541	2.60891	2.90518	3.06484	2.77318	3.00947
GRMZM2G016457_P01	3.21908	3.13389	2.88729	3.54749	3.41179	3.40049	2.80662	2.77363	2.6723	3.18096	3.10312	3.147	2.70913	2.86657	2.64357	3.03097	3.07328	2.89351	2.89255	2.81777	2.65631	2.6132	2.81995	2.69954
GRMZM2G017249_P01	2.69027	2.7433	2.7891	2.48998	2.54683	2.51049	2.75469	2.82554	3.02881	2.34738	2.5342	2.47466	2.77329	2.95128	3.04465	2.597	2.75733	2.72965	2.69243	2.84855	2.68299	2.65496	2.79298	2.73965
GRMZM2G018074_P01	6.5915	6.04573	6.66898	5.67951	5.09387	5.88055	6.06619	5.2317	5.89055	5.72594	4.9207	5.31424	6.65119	5.92145	7.00316	6.2393	5.70999	6.5796	6.51058	5.4143	6.24808	6.53578	5.66228	6.41484
GRMZM2G027640_P01	2.39565	2.72271	2.52148	3.09173	3.13201	2.84864	2.58715	2.88379	2.83464	3.17208	3.78513	3.16255	2.50088	2.75432	2.69257	2.5106	3.20623	2.95845	2.98982	3.29199	3.11752	2.7521	3.22382	2.86415
GRMZM2G055899_P01	2.71618	2.98994	2.85494	2.70558	3.1035	2.84315	2.28173	2.46778	2.2036	2.34932	2.81713	2.44757	2.26079	2.68279	2.57447	2.37344	2.92789	2.57924	2.15476	2.38184	2.22269	2.15821	2.62912	2.27435
GRMZM2G056039_P01	27.5325	31.0793	26.0692	29.0769	31.9027	32.5694	29.5517	32.232	29.4733	31.525	28.5062	33.9911	23.1797	28.0505	21.5304	25.3047	26.5684	22.1623	24.0606	24.21	22.0096	26.7689	25.451	24.1947
GRMZM2G089528_P01	2.37672	2.29562	2.56168	2.26308	2.22113	2.65896	2.12245	1.93916	2.31203	2.04906	1.85859	2.26457	2.1646	2.14349	2.50658	2.1189	2.03817	2.47073	1.94608	1.79086	2.1781	1.9591	1.71299	2.04734
GRMZM2G111998_P01	2.19598	2.02674	1.57632	1.76987	1.66734	1.47505	1.71426	1.66911	1.43484	1.65333	1.437	1.28708	1.91794	1.73827	1.4323	1.79139	1.62813	1.3943	1.44666	1.38616	1.1702	1.51058	1.44725	1.22991
GRMZM2G126988_P01	2.05779	2.18774	2.13215	2.02863	2.15021	2.09453	2.38495	2.51476	2.49579	2.1198	2.21643	2.39245	1.94255	2.14934	2.0969	2.07228	2.18666	2.08869	2.07207	2.12109	2.15204	2.32193	2.47377	2.54746
GRMZM2G130062_P01	6.40917	6.20208	7.4672	6.76715	6.54088	7.78927	6.7678	6.21079	7.25709	6.87845	6.54523	7.7042	5.73747	5.73461	6.86523	6.14426	6.04046	7.1604	5.93013	5.71783	6.64349	6.36556	6.00813	7.11314
GRMZM2G139874_P01	2.12711	2.31041	1.79448	2.94354	2.92337	2.46983	2.22068	2.40803	1.85091	2.86103	3.04982	2.42578	1.87573	2.08497	1.55402	2.07352	2.21347	1.85146	2.48269	2.50633	2.09684	2.4157	2.5036	1.95668
GRMZM2G147191_P02	2.33119	2.15601	2.34603	2.22158	1.98443	2.14482	2.06523	1.88667	2.13433	2.07522	2.01702	2.1675	2.08588	1.92357	2.28262	2.07295	1.95379	2.31262	2.02915	2.00386	2.32067	2.11879	2.07465	2.2914
GRMZM2G148281_P01	2.17066	1.81052	1.75537	2.45513	1.94281	2.03114	3.04673	2.55623	2.4959	3.30309	3.01184	2.62443	1.93339	1.69532	1.69401	2.00996	1.82895	1.77589	2.53024	2.51611	2.30745	2.55079	2.63822	2.31581
GRMZM2G157329_P01	3.21067	2.61274	2.53156	2.94114	2.38161	2.34175	3.42226	2.61923	2.84136	3.21771	2.5595	2.48475	2.91009	2.34837	2.34558	2.79773	2.39849	2.25579	3.0775	2.54574	2.41849	3.4229	2.53431	2.78073
GRMZM2G159369_P01	1.67571	2.4825	2.59106	2.14757	3.42649	3.48939	1.93735	2.82754	2.86888	2.50141	4.17705	3.98758	1.64846	2.35373	2.6	1.9442	3.19568	3.16049	2.09566	3.29901	3.14747	2.04964	3.238	3.15513
GRMZM2G170842_P01	2.28912	2.14281	1.87561	2.66735	2.53011	2.4385	2.03309	2.0028	1.79821	2.62311	2.16737	2.21362	2.27445	2.30508	2.28269	2.54646	2.39702	2.33171	2.19976	2.21145	2.01256	2.36665	2.24336	2.0471
GRMZM2G306374_P01	4.04992	3.12859	3.18946	4.06101	3.36113	3.32899	4.16006	3.27341	3.41631	4.22742	3.63577	3.53038	3.77139	3.03417	3.06443	3.77456	3.16718	3.1263	3.92433	3.11742	3.04736	4.0313	3.28234	3.29676
GRMZM2G341729_P01	3.4274	2.39266	2.60182	3.36554	2.51489	2.72365	3.40299	2.41768	2.70299	3.34481	2.47086	2.6238	3.73469	2.75021	3.10555	3.38961	2.5043	2.65956	3.70995	2.47904	2.81105	3.62502	2.47037	2.77158
GRMZM2G377641_P01	2.68718	2.7822	2.43485	2.43666	2.20262	2.19531	2.46015	2.41788	2.41348	2.27603	2.07049	2.17161	2.78167	2.64186	2.61644	2.48795	2.28498	2.54458	2.46798	2.28087	2.3344	2.40238	2.3191	2.28932
GRMZM2G473463_P01	3.58741	2.73845	3.88169	3.42339	2.65981	3.84077	2.37101	2.12994	2.67954	2.37169	2.04337	2.45191	3.2339	2.61285	3.67972	3.3531	2.70309	3.6057	2.25826	2.02187	2.35706	2.40123	2.09062	2.50361
GRMZM5G806257_P01	3.4226	1.64268	1.85022	3.62204	1.6191	1.79552	3.83854	1.88165	1.88972	3.80652	1.86309	1.93888	3.37004	1.62947	1.82109	3.41007	1.5793	1.81572	3.68156	1.8176	1.93763	3.84864	1.9671	1.95121
GRMZM5G854613_P01	2.85441	1.94205	1.93841	3.07369	1.98245	2.0526	2.78623	2.00323	1.94843	2.95098	2.13142	2.07756	2.64251	1.85659	1.86098	2.6087	1.80726	1.74424	2.96235	2.06849	2.109	3.12113	2.20852	2.26878
GRMZM2G008507_P01	2.84771	1.90554	2.06714	2.56806	1.73917	1.86537	2.89974	1.96722	2.18399	2.73941	1.96211	2.01335	3.14292	2.1609	2.38185	2.72415	2.06504	2.03045	3.15593	2.1334	2.28519	2.92208	2.06661	2.17266
GRMZM2G018241_P01	2.13391	2.11775	1.60104	2.43708	2.49368	2.04364	2.22601	2.10007	1.5718	2.59853	2.90018	2.15946	1.75207	1.7703	1.34561	1.91959	1.79754	1.37726	1.93758	1.96783	1.52297	1.99522	1.85264	1.37822
GRMZM2G018375_P02	11.0857	12.2199	12.0317	9.42855	9.67085	9.36009	10.5296	12.7524	12.993	9.30185	9.16974	10.0718	11.1284	12.1824	10.8171	10.0026	10.5668	10.0742	9.98244	10.76	10.5243	10.5408	10.6779	11.1279
GRMZM2G058584_P01	3.07672	2.56104	2.23055	2.76884	2.4751	2.22964	2.68631	2.3212	2.0776	2.68426	2.35916	2.16341	2.902	2.54975	2.23328	2.7984	2.45792	2.11516	2.55374	2.12317	1.94718	2.52974	2.15267	2.00317
GRMZM2G059580_P02	9.32526	9.17173	9.45029	10.5608	11.116	11.3108	9.57646	9.73672	9.49045	11.2718	12.503	11.2987	9.1575	9.57213	9.76132	10.2404	11.4096	11.1773	10.3806	11.1256	10.6486	10.4871	11.3653	10.8625
GRMZM2G061830_P02	2.89994	3.56475	2.93056	2.60868	3.31158	2.86432	3.06337	3.617	3.19074	2.67187	3.38837	2.74083	2.78476	3.58509	3.07204	2.57996	3.34524	2.84963	2.58628	3.0833	2.59965	2.80515	3.10469	2.75222
GRMZM2G090271_P01	3.25275	2.34162	2.64054	2.9448	2.32193	2.6083	3.71872	3.07419	3.30998	3.01915	2.72431	2.74515	3.70286	2.86391	3.03153	3.42944	2.6708	2.87143	3.48978	3.27513	2.91793	3.4425	2.7281	2.87513
GRMZM2G120300_P01	1.77473	1.90144	1.76861	1.64639	1.68363	1.63733	1.83695	1.89458	1.82652	1.61183	1.74975	1.54904	1.89296	1.98719	1.89473	1.68964	1.87629	1.67055	1.83287	1.94946	1.76434	1.71464	1.95766	1.88887
GRMZM2G141273_P03	1.54018	1.90583	2.04207	1.74739	2.23536	2.10369	1.83622	2.44085	2.33624	1.89228	2.42103	2.2784	1.5993	2.02017	2.15437	1.81565	2.28926	2.41216	1.84642	2.37625	2.37659	1.72256	2.31125	2.29649
GRMZM2G148323_P01	1.42369	2.33915	1.99983	1.54479	2.37682	1.97957	1.42912	2.2562	1.90111	1.47984	2.35302	2.00632	1.47427	2.40986	2.11172	1.48571	2.45284	2.01871	1.6222	2.44152	2.06905	1.54039	2.37058	1.9137
GRMZM2G168335_P01	2.28553	2.13031	2.67193	2.19302	1.96557	2.54701	2.56016	2.48796	3.24891	2.37068	2.23594	2.96496	2.04545	1.94103	2.48428	2.07443	1.95148	2.48868	2.08491	2.12199	2.66505	2.38584	2.16573	2.92919
GRMZM2G170336_P01	1.7967	2.24736	2.13365	1.70356	2.49015	2.5591	1.85493	2.45986	2.3831	1.98885	2.73137	2.75535	1.58642	2.16461	2.21915	1.70272	2.31246	2.19232	1.59313	2.19174	2.3026	1.7737	2.40244	2.45473
GRMZM2G173777_P01	0.911485	0.755693	1.2216	0.934959	0.762122	1.11349	0.91176	0.714485	1.09366	0.919371	0.798606	1.07825	0.786316	0.641905	1.16103	0.811808	0.783579	1.16772	0.864351	0.744152	1.07383	0.85995	0.799458	1.09043
GRMZM2G303631_P03	3.1897	2.7154	2.7768	3.14903	2.73503	2.90719	2.88075	2.48275	2.59187	2.94696	2.55557	2.74839	2.71241	2.36765	2.52795	2.83347	2.55012	2.54216	2.59135	2.26047	2.39501	2.69633	2.33302	2.51063
GRMZM2G316113_P01	2.17006	2.04344	1.95839	1.9831	1.96945	2.10448	2.27499	2.23031	2.03897	2.03547	2.21308	2.10487	2.0443	2.18113	1.97756	2.02411	2.09599	1.86061	2.24219	2.15506	1.97228	2.22578	2.11155	1.98284
GRMZM2G365423_P01	2.93757	2.80767	2.52424	3.02368	2.89456	2.68724	3.20961	3.12839	2.80381	3.58527	3.34714	3.15811	2.65327	2.58781	2.24876	2.79688	2.71213	2.45971	2.86898	2.7152	2.46124	2.92473	2.80711	2.65688
GRMZM2G399212_P01	1.68613	1.39278	1.27982	1.68413	1.44343	1.30732	1.55351	1.31287	1.19255	1.65435	1.3939	1.27892	1.56266	1.34776	1.2482	1.60709	1.37125	1.2608	1.64287	1.33862	1.19923	1.60925	1.39939	1.23316
GRMZM2G418604_P02	1.31545	1.17074	1.25391	1.40113	1.19814	1.21417	1.412	1.25844	1.19219	1.45431	1.20914	1.27239	1.3498	1.28193	1.26816	1.36439	1.27618	1.24992	1.36015	1.30676	1.27891	1.34277	1.29868	1.27034
GRMZM5G863596_P02	2.75663	3.52725	2.93092	2.78155	3.51066	2.89306	2.34895	2.90246	2.1398	2.38955	3.02872	2.29931	2.2473	2.89885	2.40035	1.94994	2.62217	2.02957	1.73294	2.16837	1.61954	1.79314	2.34152	1.68746
GRMZM5G866223_P01	2.8459	3.5059	2.75315	2.34552	2.82801	2.2914	2.69064	3.28967	2.65426	2.42175	3.11725	2.51347	2.831	3.47462	2.80706	2.56323	3.17565	2.54141	2.69711	3.32548	2.77186	2.60485	3.28342	2.66739
AC211394.4_FGP004	2.5414	2.75	2.23003	2.33219	2.5184	2.17519	2.62229	2.75054	2.30899	2.47547	2.47182	2.26712	2.4032	2.55375	2.20159	2.30709	2.49538	2.15562	2.72347	2.65254	2.34608	2.5949	2.80757	2.31536
GRMZM2G005592_P01	1.41772	0.870795	0.74279	1.56379	0.925969	0.817268	1.74328	1.06145	0.871712	1.63832	1.07345	0.865595	1.5544	0.940562	0.864448	1.51287	0.959299	0.869571	1.80799	1.07267	1.03114	1.76163	1.09581	0.937473
GRMZM2G030072_P02	1.91748	1.97006	1.70614	2.1979	2.32139	2.26744	1.98299	2.18882	1.80875	2.30376	2.45098	2.22451	1.80994	1.99952	1.73897	1.98768	1.99434	1.75163	2.0087	2.1293	1.83064	1.79154	1.94558	1.67193
GRMZM2G033098_P01	2.17085	2.56173	1.97982	2.39885	2.88178	2.20733	1.60638	1.97686	1.47997	1.87704	2.35748	1.65938	1.71804	2.13802	1.6709	1.97066	2.32808	1.94588	1.65117	1.8727	1.49734	1.60701	1.88335	1.55937
GRMZM2G052812_P02	1.93711	2.35063	2.70482	2.18284	2.68185	3.22047	1.99188	2.58215	2.9014	2.0549	2.81129	3.19695	1.82985	2.32065	2.61369	1.98748	2.39751	2.82514	1.94324	2.52005	2.71455	2.07271	2.33588	2.82298
GRMZM2G053669_P01	2.27014	2.26394	1.80211	3.03167	3.60308	2.98977	1.95398	1.63744	1.27195	1.91872	1.75703	1.26317	4.77456	5.72668	5.1698	3.56128	4.14056	3.39859	2.1407	1.8581	1.50147	2.34894	2.01316	1.60315
GRMZM2G065083_P01	3.09228	3.46995	3.36024	2.49357	2.81361	2.75707	3.01245	3.50027	3.22849	2.54008	3.08221	2.92573	3.1553	3.77698	3.75952	2.75106	3.29547	3.09134	3.03316	3.48969	3.44152	2.92212	3.57182	3.4361
GRMZM2G066575_P01	1.43243	1.83402	1.58652	1.42311	1.67696	1.55614	1.68694	2.05997	1.86948	1.51774	1.80493	1.68755	1.46139	1.82848	1.64546	1.46297	1.68838	1.78248	1.51029	2.09406	1.93024	1.50513	2.01321	1.94212
GRMZM2G075502_P01	1.95397	2.11524	2.65753	0.916275	1.05212	1.28558	2.10856	2.44937	2.85982	1.00105	1.29138	1.40925	1.73454	2.03512	2.39866	1.01314	1.31031	1.44606	1.88952	2.19558	2.20914	1.38295	1.55088	1.73397
GRMZM2G135029_P03	2.00064	1.74795	2.20898	1.75521	1.58198	2.03892	1.88612	1.66746	2.22553	1.69845	1.44181	1.97634	2.08059	1.87144	2.29016	1.95207	1.64011	2.18381	1.84315	1.51129	2.05865	1.78379	1.53795	2.01761
GRMZM2G142097_P02	2.28403	2.14418	1.99208	2.40155	2.32244	2.30928	1.97809	1.86664	1.8704	2.56699	2.80465	2.48046	2.18468	2.21836	2.07911	2.39673	2.41604	2.23132	2.18336	2.28426	2.14078	2.00457	1.94344	1.89659
GRMZM2G145201_P01	1.41057	1.85757	1.0189	1.29105	1.65244	0.876799	1.35031	1.60837	0.967145	1.34358	1.77658	0.954283	1.49115	1.85373	1.1469	1.35131	1.81717	1.06703	1.38967	1.67438	0.957913	1.37235	1.75976	1.01102
GRMZM2G148594_P01	1.29332	1.01428	1.10203	1.50881	1.03445	1.20352	1.37324	0.94781	1.10138	1.43516	1.05745	1.15641	1.23059	0.948495	1.08672	1.33956	1.01448	1.12092	1.39029	0.972382	1.07728	1.42902	1.01066	1.15174
GRMZM2G150906_P01	2.28536	1.77781	1.75279	2.12607	1.62571	1.65675	2.49448	1.86059	1.901	2.23734	1.74537	1.68133	2.1627	1.68155	1.7703	2.11082	1.66046	1.74235	2.30129	1.82851	1.78038	2.28194	1.82	1.71511
GRMZM2G161493_P01	2.7791	2.54245	2.83768	2.72787	2.57221	2.73041	2.50709	2.22795	2.49571	2.614	2.36647	2.60746	2.66105	2.43471	2.80743	2.59229	2.42419	2.5296	2.46728	2.18203	2.40553	2.65131	2.25001	2.58618
GRMZM2G332976_P01	1.84047	2.24789	2.62894	1.89132	2.43608	2.99601	2.63656	3.10832	3.7087	2.74463	3.06599	3.85124	1.94872	2.39243	2.92542	1.97451	2.35449	3.01339	2.30944	2.69203	3.28244	2.65436	2.70278	3.59386
GRMZM2G464000_P02	0.79553	0.514158	0.380582	0.74754	0.459794	0.381249	0.787453	0.464329	0.361041	0.732092	0.528637	0.372067	0.71633	0.492515	0.361865	0.70794	0.513385	0.355586	0.746207	0.515394	0.392314	0.766908	0.511787	0.395297
GRMZM5G837364_P02	2.04291	2.47562	2.56337	1.97648	2.54123	2.48904	2.27717	2.95037	2.81843	2.19058	2.91329	2.70795	2.07705	2.49936	2.46103	2.10626	2.57324	2.62879	2.12168	2.96237	2.59569	2.20786	3.08452	2.7357
GRMZM5G878823_P02	2.22205	2.37254	2.39311	2.46829	2.5168	2.47079	2.09972	1.98882	2.19089	2.46105	2.34351	2.54919	2.18655	2.26474	2.43398	2.2987	2.35184	2.53939	2.12572	2.06827	2.18683	2.13793	2.09347	2.23583
GRMZM6G869379_P02	2.55179	2.71574	3.106	2.84115	3.15103	3.75706	2.72861	2.78927	3.21633	2.91368	3.09042	3.91943	2.59	2.74483	3.11317	2.75442	2.83641	3.35034	2.75158	2.78416	3.18765	2.86877	2.88813	3.35003
GRMZM2G343543_P05	23.0307	24.3445	23.0353	21.7457	24.9694	23.7305	24.1516	26.9183	25.6125	26.7216	24.8137	27.8479	22.3558	24.603	21.1885	22.1224	22.9055	21.7432	23.5692	22.6781	22.731	26.3032	23.7675	26.1111
AC202185.4_FGP004	3.1166	2.26193	2.35454	2.935	2.25447	2.34127	3.02305	2.10276	2.40909	2.63538	1.99785	2.09893	2.91024	2.09778	2.28841	2.75523	2.08964	2.18558	2.85398	2.14639	2.18462	2.77052	2.04917	2.13755
GRMZM2G016890_P01	8.93948	9.99293	10.7014	13.178	13.8966	15.5993	4.52133	5.16558	5.21969	5.53892	6.67575	6.82228	5.2952	6.08513	6.19969	6.27632	7.24257	7.68699	4.27138	5.06732	4.9084	4.97942	5.87412	5.8622
GRMZM2G017421_P02	1.33398	2.13038	1.45178	1.52476	2.15251	1.4788	1.38847	2.20949	1.50365	1.55018	2.32651	1.55378	1.43656	1.982	1.47808	1.55076	2.05803	1.59171	1.50441	2.05455	1.46166	1.71088	2.08652	1.48055
GRMZM2G031572_P01	3.86408	3.44539	3.23814	3.42184	2.98412	2.80672	3.03222	2.56554	2.55377	2.71224	2.51769	2.29327	3.4199	3.15004	3.01209	3.37309	3.0719	2.8743	3.10805	2.66571	2.53244	3.06859	2.59962	2.68926
GRMZM2G032252_P01	1.57559	1.86565	1.71646	1.6404	1.91012	1.91539	1.45742	1.84229	1.72557	1.62103	2.10324	1.9338	1.4196	1.70117	1.62567	1.37401	1.79123	1.60043	1.39063	1.84756	1.70454	1.52131	1.93875	1.77815
GRMZM2G032409_P01	1.06946	1.31705	1.58144	1.18234	1.36395	1.5881	1.1313	1.44655	1.71232	1.23905	1.63571	1.73091	1.05561	1.20719	1.51065	1.07066	1.28399	1.5455	1.10491	1.30902	1.63456	1.14668	1.43654	1.69652
GRMZM2G039930_P02	2.23221	2.85172	3.43391	2.02904	2.53681	3.19696	2.28212	3.10186	3.62368	2.02461	2.61655	3.18739	2.16567	2.68563	3.09575	2.0317	2.8048	3.08413	2.16678	2.76709	3.14225	2.06786	2.63554	3.23594
GRMZM2G050108_P01	1.92609	1.90881	2.08435	1.77458	1.92509	1.98389	2.43099	2.76477	3.00315	2.21813	2.42933	2.82696	2.01681	2.03225	2.27	2.02331	2.20511	2.32787	2.28766	2.37855	2.6981	2.32242	2.35607	2.80567
GRMZM2G058745_P01	2.37462	1.97183	1.96818	2.3445	2.03291	1.92309	2.63846	2.27785	2.29103	2.82031	2.4569	2.43673	2.33732	2.01335	2.17841	2.354	2.0409	1.99263	3.12214	2.51759	2.53352	3.00864	2.68866	2.67641
GRMZM2G067546_P01	2.83041	3.39114	2.97826	2.91083	3.1633	3.11706	2.57634	3.0086	2.69608	2.41577	2.87572	2.697	2.6498	3.17504	2.92244	2.40992	2.97404	2.85319	2.49229	3.06129	2.89437	2.71464	3.35087	2.8416
GRMZM2G088669_P01	2.91077	3.11146	2.68122	2.91191	3.24541	2.70775	2.9743	3.36375	3.0187	2.95856	3.18233	3.07476	2.78858	3.138	2.61695	2.77656	3.09272	2.5937	2.87071	2.83606	2.66672	2.80861	3.03027	2.6402
GRMZM2G092379_P02	1.86312	2.72238	3.17146	1.76962	2.55599	2.90854	1.41539	1.89339	2.31139	1.37705	1.80966	1.99483	1.9885	2.71462	3.28214	1.92943	2.72318	3.24742	1.37705	1.7904	2.0525	1.27983	1.7904	2.03173
GRMZM2G116693_P01	1.65736	1.85094	1.73582	1.78282	1.96599	1.83291	1.66132	2.11821	1.71069	1.7391	2.20362	1.83686	1.48658	1.80698	1.65474	1.53807	1.95901	1.71361	1.549	1.93558	1.71189	1.58575	2.15966	1.80347
GRMZM2G122787_P02	2.60246	2.59489	2.23799	2.39406	2.46756	2.30958	2.58394	2.52176	2.31215	2.5065	2.43611	2.19298	2.35547	2.43611	2.19322	2.31327	2.28705	2.0456	2.63437	2.53506	2.27927	2.60993	2.72145	2.42921
GRMZM2G139786_P01	2.49626	2.622	2.17409	3.93759	4.35725	3.56171	2.00952	1.84361	1.84782	2.84488	2.45897	2.4459	1.93126	2.13241	1.90073	2.62506	2.74115	2.2786	2.17119	1.99512	1.96265	1.98425	1.8495	1.8285
GRMZM2G151440_P01	2.18627	2.74182	2.28139	2.09456	2.67339	2.2325	2.5993	3.15053	2.58894	2.52545	3.16722	2.66146	2.28691	2.94823	2.45306	2.24639	2.83599	2.29585	2.51434	3.25482	2.72045	2.5468	3.22799	2.76635
GRMZM2G163129_P01	2.5606	2.53506	2.12953	2.88362	2.45778	2.12007	2.85454	2.56588	2.2759	2.81489	2.40569	2.38659	2.84133	2.58666	2.08139	2.67691	2.30371	2.26193	2.66925	2.56881	2.4227	2.69885	2.57639	2.32189
GRMZM2G174572_P01	2.3962	2.07409	1.98497	2.36172	2.07876	1.98037	2.29582	2.09615	1.85576	2.25008	2.08873	1.87656	2.36383	2.09127	2.12759	2.37696	2.15088	2.07178	2.52214	2.19161	2.08078	2.43325	2.22851	2.02218
GRMZM2G394827_P03	2.28392	1.62464	2.03352	2.62678	1.94903	2.60498	3.17054	2.18659	2.77248	2.94686	2.51148	2.85581	2.19913	1.73227	2.28076	2.48284	2.04901	2.41189	2.61057	1.92108	2.41908	2.67936	2.02589	2.62148
GRMZM2G006377_P01	1.74146	2.56678	3.19039	1.59465	2.3732	2.70361	1.43247	1.74692	2.18649	1.24374	1.55383	1.88487	1.57986	2.28731	3.03314	1.60357	2.2071	2.75634	1.39852	1.63082	2.10986	1.40573	1.63404	2.1353
GRMZM2G012031_P01	0.558361	0.522053	0.505923	0.717295	0.643786	0.597021	0.625576	0.60681	0.61875	0.794195	0.855467	0.807009	0.499243	0.470722	0.478078	0.576196	0.540911	0.594392	0.592762	0.639177	0.685813	0.636372	0.721074	0.713013
GRMZM2G016254_P02	0.970557	1.69333	1.33422	1.02726	1.61253	1.44214	3.10468	4.02139	2.93565	2.82013	3.65614	2.93843	1.21948	1.82232	1.60807	1.20516	1.73349	1.72329	3.79632	4.63015	3.48229	3.85641	4.83065	3.53592
GRMZM2G017853_P02	2.36184	2.21526	2.44277	2.37728	2.14608	2.4783	2.25995	2.07753	2.41842	2.20817	1.85935	2.34761	2.20603	1.9977	2.43706	2.21102	2.02654	2.3491	2.17777	1.77011	2.25567	2.19795	1.90742	2.27107
GRMZM2G049342_P01	0.699377	0.240151	0.363432	0.78184	0.255715	0.40562	0.733842	0.209379	0.327333	0.79213	0.287697	0.35781	0.709809	0.2383	0.384813	0.752167	0.259653	0.407196	0.75985	0.250614	0.380229	0.770986	0.258491	0.373567
GRMZM2G053803_P02	2.90525	2.43316	1.70931	3.29814	2.63144	1.91365	3.14515	2.54954	1.89096	3.57504	2.90227	2.10475	2.66329	2.25764	1.71068	2.78427	2.4619	1.67373	3.28786	2.69465	1.95008	3.34101	3.06941	2.04684
GRMZM2G059381_P01	1.95155	1.89125	1.85676	1.98047	1.90383	1.93049	2.51085	2.33004	2.37859	2.62215	2.15549	2.49406	1.9717	1.79238	1.91421	1.93181	1.68812	1.88395	2.39755	2.08934	2.1869	2.63392	2.14956	2.35504
GRMZM2G073912_P01	2.53667	2.58364	2.41329	2.3911	2.50436	2.52754	2.48338	2.68987	2.51444	2.41923	2.59737	2.58294	2.5231	2.67977	2.51493	2.5004	2.50307	2.48921	2.6102	2.68624	2.41972	2.53593	2.75568	2.53793
GRMZM2G080044_P01	2.88547	2.28259	1.89655	2.69906	2.22639	1.69433	3.22307	2.43751	1.99912	2.86668	2.26378	1.8013	3.05662	2.48628	1.95699	2.85876	2.32324	1.81137	3.19372	2.40499	1.90387	3.21662	2.57523	1.93648
GRMZM2G086801_P01	2.52395	1.9552	2.4846	2.73988	1.9812	2.48068	2.74141	2.18347	2.57648	2.87967	2.2526	2.71199	2.61587	1.95441	2.60025	2.57258	2.05407	2.56276	2.95352	2.30933	2.7333	2.97312	2.30972	2.84994
GRMZM2G094224_P01	3.34271	2.29301	2.80138	2.61445	1.9548	2.08605	2.00447	1.55574	1.4592	1.66959	1.45868	1.32039	3.30253	2.6468	3.23415	2.8616	2.51906	2.56786	2.17898	1.78557	1.79104	2.02568	1.78633	1.73993
GRMZM2G097164_P01	2.49063	2.85831	2.46296	2.90502	3.0461	2.82401	2.54095	3.6207	3.12917	3.11133	3.79291	3.70557	2.69141	2.85399	2.63567	2.76563	2.89956	2.83991	2.71682	3.61666	3.21817	2.77821	3.31177	3.18453
GRMZM2G131443_P02	1.20041	1.60466	1.57208	1.27658	1.60371	1.61466	1.26242	1.64605	1.57574	1.33126	1.70349	1.6828	1.24545	1.55382	1.60052	1.21872	1.55855	1.59639	1.21824	1.67532	1.68375	1.24692	1.65439	1.67406
GRMZM2G140917_P01	1.04098	1.33482	1.48091	1.02907	1.27425	1.36263	1.27478	1.53311	1.59059	1.19897	1.36093	1.48252	1.05257	1.29586	1.49331	0.963988	1.30805	1.45889	1.24153	1.43728	1.57717	1.19811	1.4557	1.55398
GRMZM2G151169_P01	2.88344	3.82072	3.31503	2.77624	3.88851	3.29483	2.76733	3.92979	3.43009	2.82358	3.85784	3.61979	2.54125	3.60486	3.11677	2.77374	3.53102	3.4455	2.60055	3.6113	3.29894	2.83388	3.75596	3.47905
GRMZM2G153722_P01	0.253761	0.105906	0.25782	0.257288	0.124363	0.267744	0.20905	0.0978749	0.190835	0.228821	0.164435	0.233355	0.269072	0.0931093	0.255929	0.252462	0.125754	0.241166	0.262409	0.144889	0.291546	0.267137	0.143668	0.261603
GRMZM2G155911_P01	1.94619	2.66507	2.18395	1.93175	2.56903	2.35881	2.0168	2.42186	2.14406	1.97849	2.41413	2.19319	1.97327	2.53636	2.28467	1.98771	2.46901	2.33808	2.083	2.43134	2.3009	2.0828	2.4932	2.19634
GRMZM2G158024_P02	2.35583	2.06174	2.06351	2.65446	2.2008	2.13794	2.74737	2.56088	2.28277	3.0446	2.91013	2.58455	2.26221	2.0853	2.09142	2.45131	2.28763	2.18467	2.84426	2.41056	2.35801	2.63995	2.48296	2.29713
GRMZM2G179797_P03	3.80156	3.64616	3.26122	4.1867	3.86646	3.67906	3.8451	3.42195	3.19507	4.21964	3.96827	3.59883	3.60938	3.12857	3.05852	3.90785	3.33149	3.17738	3.81097	3.18356	2.98942	3.6188	3.45353	3.0405
GRMZM2G356894_P01	1.21657	1.04032	1.02755	1.42163	0.950192	1.18818	1.30172	0.972509	1.1301	1.42551	1.0778	1.0963	1.34888	0.912997	1.1415	1.33053	1.03793	1.09884	1.4843	1.03565	1.17329	1.47086	0.972604	1.14425
GRMZM2G457889_P01	2.15706	1.94385	1.95592	2.0466	1.85146	1.89217	2.17885	2.10983	2.02957	2.1505	2.05403	2.03215	1.98079	1.93879	1.93929	1.92895	1.87572	1.89831	2.21715	2.01905	2.0858	2.34009	2.20727	2.16678
GRMZM2G460406_P01	2.02036	2.14946	2.16089	2.02663	2.17493	2.2989	1.61269	1.79919	1.75824	1.83513	2.13123	2.00389	1.94909	2.29659	2.43057	1.98414	2.34951	2.25108	1.89994	2.16351	2.19365	1.67202	1.93557	1.90279
AC206968.3_FGP003	2.30974	2.33505	2.98566	2.5847	2.76026	3.09555	2.40911	2.07354	2.87755	2.62608	2.42818	3.41333	2.44862	2.42327	2.92848	2.53162	2.6649	3.26918	2.57675	2.06707	3.22153	2.51339	2.24773	3.20872
GRMZM2G006937_P01	1.55472	1.66989	1.55541	1.72318	1.85001	1.76443	1.5485	1.6849	1.5315	1.71277	1.89538	1.70211	1.57507	1.56835	1.55633	1.57772	1.82387	1.6566	1.6562	1.73381	1.6583	1.65185	1.77378	1.57531
GRMZM2G007791_P01	1.36981	0.722452	1.20822	1.39238	0.701212	1.20356	1.3091	0.723624	1.17709	1.33046	0.782876	1.25124	1.37196	0.666203	1.26337	1.25832	0.747647	1.24732	1.47579	0.791226	1.30431	1.49218	0.86476	1.34488
GRMZM2G008456_P01	2.55951	3.14292	2.18094	2.46759	2.86143	2.06616	2.72792	3.20971	2.41377	2.59196	3.03045	2.16913	2.41738	2.90213	2.04802	2.25361	2.77693	1.93018	2.42819	2.96893	2.04758	2.55385	3.1075	2.14421
GRMZM2G052100_P01	1.50862	1.63619	1.61011	1.47988	1.71552	1.58178	3.97279	3.52159	3.51568	3.66342	4.07012	3.21959	1.54683	1.75576	1.83183	1.37039	1.55472	1.39725	4.68672	4.76081	4.46554	5.77135	4.98527	5.37821
GRMZM2G053261_P01	0.862129	2.21841	1.60167	0.858505	2.17832	1.65586	0.903671	2.06193	1.6092	0.881132	2.22596	1.79582	0.824564	2.0755	1.53701	0.857886	2.03477	1.56713	0.911272	2.03843	1.59054	0.900842	2.16668	1.64276
GRMZM2G053726_P01	3.90778	5.27815	4.66484	3.96648	5.38946	4.80966	3.4323	4.48643	3.77342	3.51399	4.67247	3.65809	4.1723	5.32048	4.93908	4.07672	5.73071	4.90519	3.43508	4.65574	3.59118	3.49535	4.46657	3.65853
GRMZM2G065669_P01	2.21557	1.70138	1.85515	2.07825	1.60721	1.82819	2.1061	1.77692	1.85664	2.08617	1.75588	1.7709	1.78518	1.41664	1.60484	1.86809	1.51857	1.5936	1.84517	1.5841	1.71455	2.01548	1.63929	1.77614
GRMZM2G081037_P02	2.81352	2.62769	2.50848	2.98644	2.83203	2.74777	2.63253	2.53522	2.38834	2.91961	2.76613	2.69675	2.54064	2.39838	2.38482	2.7751	2.67765	2.42353	2.71384	2.56179	2.46349	2.61832	2.60112	2.38683
GRMZM2G083076_P03	2.87341	2.24599	1.92746	3.2288	2.72158	2.54747	2.68404	2.209	2.28867	3.23847	2.63355	2.62257	2.94003	2.41403	2.15212	2.98301	2.59366	2.47749	3.19038	2.64291	2.73565	2.86186	2.53928	2.24856
GRMZM2G086116_P01	2.74205	2.62273	2.62989	2.83605	2.60978	2.79662	2.78652	2.51477	2.60416	2.80988	2.69615	2.6693	2.66916	2.36336	2.53205	2.70152	2.36056	2.56368	2.71334	2.35091	2.55028	2.74149	2.48174	2.65402
GRMZM2G089121_P02	2.57805	2.28724	1.80224	2.37428	2.04841	1.71699	2.65003	2.39606	1.83258	2.35071	2.28841	1.77009	2.78765	2.50464	1.95629	2.67639	2.50697	1.96532	2.84417	2.462	1.99494	2.73873	2.50627	1.96153
GRMZM2G103179_P01	1.1632	1.26042	1.17521	1.20725	1.31019	1.18754	1.07568	1.19316	1.07401	1.19441	1.33128	1.20472	1.07914	1.23225	1.14409	1.08978	1.21296	1.06479	1.09903	1.22197	1.07712	1.09152	1.23778	1.07251
GRMZM2G138060_P01	3.12587	2.69132	2.43085	2.73991	2.55027	2.0423	2.38226	2.19369	1.84756	2.27497	2.1861	1.67325	2.95015	2.62894	2.28137	2.7592	2.5424	2.13561	2.36236	2.04364	1.80277	2.40528	2.16363	1.78629
GRMZM2G166507_P01	0.195244	0.327967	0.259064	0.239042	0.341638	0.249119	0.248206	0.330794	0.270255	0.267804	0.51896	0.27431	0.206753	0.280701	0.229252	0.19662	0.354278	0.211764	0.373106	0.406865	0.244906	0.273225	0.438797	0.26133
GRMZM2G167156_P02	2.59026	2.75183	1.82293	2.41143	2.40239	1.61512	2.01123	2.071	1.58815	2.09553	2.10212	1.51654	2.58107	2.50623	1.81438	2.49573	2.3676	1.68426	1.90961	1.89392	1.4588	1.90514	1.90491	1.49982
GRMZM2G407044_P01	3.24627	3.23049	3.42861	3.82659	3.75496	4.21614	3.71097	3.78359	4.19037	4.24002	4.43814	4.86227	2.94655	2.70951	3.16587	3.14657	3.05301	3.38387	3.40361	3.37648	3.70282	3.47942	3.65382	4.05005
GRMZM2G420436_P01	2.1708	2.04311	2.03259	2.12295	2.00556	1.94787	1.92835	1.83425	1.79446	2.12425	1.8718	1.92648	2.24342	2.13383	2.16585	2.1861	2.08329	2.09388	2.1598	2.05325	2.04061	2.06433	1.97491	1.99825
GRMZM2G437119_P02	1.62171	1.99677	1.94447	1.59238	2.13256	2.07212	1.73664	2.20628	2.12503	1.99694	2.31941	2.26711	1.37013	1.95538	1.98014	1.30434	2.03796	2.22362	1.73379	2.1777	2.18534	1.64406	2.17395	2.20218
GRMZM5G874478_P03	2.42227	2.41804	1.57103	2.39752	2.28164	1.51933	2.79802	2.56947	1.93733	2.43393	2.64435	1.70434	2.10291	2.04651	1.47085	2.01296	2.06845	1.46875	2.28853	2.49459	1.62694	2.54387	2.47694	1.70143
GRMZM2G122337_P01	3.25049	1.99678	2.96484	2.63392	1.7462	2.49161	4.13345	2.68277	4.22536	2.84148	2.13628	2.73039	2.94236	1.97782	3.14912	2.58302	1.78226	2.55293	3.22916	2.39778	3.49259	3.38612	2.28012	3.39317
AC212859.3_FGP007	0.228208	0.395308	0.468648	0.271186	0.364025	0.515715	0.276865	0.385532	0.527686	0.288074	0.430648	0.542445	0.215065	0.338609	0.445716	0.196537	0.295411	0.436629	0.259805	0.369669	0.520475	0.26426	0.420798	0.542686
GRMZM2G001898_P01	2.61894	2.49611	2.46378	2.60343	2.4613	2.62945	2.4994	2.28031	2.37399	2.4879	2.15942	2.44911	2.35927	2.19376	2.24803	2.61653	2.19948	2.41724	2.30551	2.02517	2.1031	2.50903	2.18446	2.31531
GRMZM2G005552_P01	3.63117	2.82378	2.67221	3.74766	2.89096	2.73555	2.57644	2.53746	2.38552	2.87216	2.61449	2.48948	3.51502	2.89693	2.5225	3.20394	2.8617	2.59018	2.75634	2.64853	2.30972	2.69726	2.72615	2.29483
GRMZM2G007012_P01	1.99611	1.97099	1.67825	2.16686	2.00052	1.76995	2.30726	2.11917	1.85051	2.55219	2.13746	1.96518	2.11348	1.86539	1.90639	2.29687	1.90886	1.86474	2.31317	2.05523	1.95215	2.25408	1.94237	2.01283
GRMZM2G015384_P02	2.49949	2.19534	1.83256	2.63023	2.22592	1.8342	2.78123	2.32269	1.9532	2.85496	2.49482	2.02409	2.42348	2.04396	1.744	2.44552	2.14182	1.70427	2.6211	2.22067	1.92805	2.74399	2.3548	1.97963
GRMZM2G022313_P01	1.58435	1.96122	1.94716	1.86619	2.08505	1.95982	2.10386	2.31945	2.21644	1.9755	2.17815	2.28013	1.49167	1.76368	1.71737	1.53238	1.84066	1.88763	1.6578	2.05183	1.84833	1.78824	1.79996	2.14312
GRMZM2G023080_P01	2.52671	2.91314	3.26001	2.63613	3.41354	3.51772	2.28486	3.03701	3.04695	2.46968	3.07284	3.31455	2.4403	3.05245	3.17676	2.56637	3.38142	3.46764	2.52965	3.07407	3.15858	2.5463	3.05554	3.05779
GRMZM2G054465_P01	2.22918	2.8663	2.25739	2.3329	2.9956	2.34174	1.85883	2.58596	1.8687	1.95546	2.78556	1.95261	1.77749	2.5946	1.82783	2.04799	2.85319	1.98435	1.92296	2.7376	1.86696	1.87519	2.58119	1.90043
GRMZM2G056766_P01	1.29368	0.948209	0.999827	1.38975	0.977199	1.1594	1.44067	0.959713	1.1942	1.5429	1.16025	1.28677	1.20736	0.928514	1.01562	1.27739	0.917838	1.0365	1.41181	0.995237	1.15067	1.43644	1.11304	1.15701
GRMZM2G068217_P01	0.961096	1.01392	1.06566	0.981279	0.969416	0.986276	1.02857	0.999085	1.25729	1.05441	1.00582	1.18973	0.914294	0.937502	1.01606	0.946763	0.995962	1.08735	1.05353	1.02953	1.21251	1.06006	1.04876	1.18513
GRMZM2G080937_P01	1.61378	1.68846	1.75621	1.67903	1.72557	1.81964	1.72912	1.92001	1.91522	1.84495	2.02272	2.03634	1.52164	1.68125	1.65751	1.52809	1.63659	1.59303	1.47557	1.58798	1.57149	1.60782	1.73742	1.65055
GRMZM2G083783_P01	1.04246	0.814306	0.818701	1.01824	0.794863	0.772094	1.09842	0.741792	0.784697	1.04784	0.780599	0.703532	0.921165	0.70689	0.770351	0.882312	0.718126	0.723031	0.989291	0.700117	0.670559	1.00027	0.743306	0.757035
GRMZM2G087628_P02	1.83467	2.05685	1.50514	1.82551	2.21038	1.65392	1.68658	1.9508	1.43307	1.71767	1.98882	1.4756	1.82713	2.00465	1.50143	1.75703	2.03671	1.58541	1.70311	1.84969	1.46679	1.6483	1.9021	1.37863
GRMZM2G088196_P01	3.47124	2.18054	2.34534	3.09958	1.646	2.08026	3.18721	2.03106	1.91187	3.33287	1.51357	1.98624	3.41867	2.11695	2.12916	3.07366	2.27866	2.02063	3.18027	1.43053	1.72964	3.23649	1.80269	1.79686
GRMZM2G103490_P01	1.55216	1.98739	1.89683	1.67712	2.03902	1.92619	1.74572	2.10734	1.87249	1.7246	2.06965	1.93028	1.50658	1.94734	1.76751	1.56756	1.93595	1.80245	1.58614	1.96559	1.87639	1.64012	1.94773	1.92786
GRMZM2G111411_P01	2.03278	2.70241	2.04404	2.23362	2.93305	2.34523	2.60743	3.30413	2.61024	2.51377	3.02197	2.47922	2.2951	2.90194	2.20279	2.11598	2.80178	2.19771	2.6228	3.24111	2.54716	2.57853	3.09362	2.57362
GRMZM2G114354_P01	2.21987	2.33636	2.03593	2.0421	2.14389	1.9808	2.38786	2.34733	2.24422	2.57407	2.49169	2.41258	2.31831	2.40082	2.24717	2.27209	2.30257	2.19817	2.65896	2.55794	2.47341	2.52674	2.4194	2.40772
GRMZM2G120579_P01	2.44701	2.05916	2.34793	2.54437	2.32289	2.6083	2.86174	2.61517	2.89372	3.10797	2.91427	3.11165	2.83314	2.47564	2.7733	2.66985	2.47287	2.70082	3.37501	3.21784	3.38538	3.16091	2.92215	3.17889
GRMZM2G139977_P01	0.39109	0.521701	0.303121	0.401054	0.510878	0.253094	0.352365	0.483357	0.225487	0.340545	0.498151	0.225854	0.383426	0.497009	0.268364	0.354785	0.475906	0.246022	0.391332	0.509518	0.246363	0.385403	0.503481	0.231695
GRMZM2G141535_P01	3.44964	3.52807	2.95647	3.43149	3.59958	2.93964	2.53213	2.63042	2.12994	2.77503	2.85393	2.36736	2.61276	2.7641	2.38921	2.70481	3.01744	2.46481	2.19315	2.16471	1.88721	2.30099	2.44176	1.86536
GRMZM2G146878_P01	0.84673	0.843897	0.801213	0.911324	0.956615	0.884403	0.813292	0.843401	0.888302	0.861818	0.849186	0.9204	0.875438	0.850673	0.82311	1.01042	0.991736	1.02997	0.872584	0.838939	0.84061	0.808398	0.825552	0.811996
GRMZM2G156516_P02	1.95084	1.5175	1.72203	1.89785	1.55609	1.75739	2.95587	2.15171	2.70459	2.92048	2.33062	2.91071	2.00761	1.75498	1.90511	1.98282	1.68375	1.87224	3.28571	2.57757	3.2265	2.99883	2.42778	2.90142
GRMZM2G157369_P01	2.06548	1.98602	1.80235	1.91465	1.88399	1.74336	2.21756	2.0953	1.90993	2.20244	2.09883	1.9313	2.24077	2.03204	2.01495	2.0054	1.91023	1.7682	2.36653	2.11802	2.06408	1.98717	1.87557	1.76582
GRMZM2G158021_P01	2.573	2.6311	2.2854	2.65261	2.69154	2.29062	2.19766	2.32865	1.88324	2.41275	2.62228	2.14968	2.33289	2.41744	2.18917	2.40795	2.55649	2.27428	2.21409	2.32839	1.95518	2.20904	2.42412	1.97243
GRMZM2G158043_P02	2.3403	2.24129	2.09438	2.14375	2.20407	2.07333	2.46335	2.39353	2.23974	2.30298	2.35	2.23738	2.04536	2.04123	2.01171	2.02704	2.12806	1.97027	2.33012	2.25437	2.15321	2.34709	2.38744	2.21999
GRMZM2G158575_P02	1.6513	1.74487	1.27517	1.7756	1.67015	1.2175	1.79312	1.67274	1.21675	1.93441	2.01526	1.22819	1.66092	1.52141	1.24708	1.68907	1.73331	1.26945	1.76633	1.82096	1.2605	1.72925	1.82131	1.28536
GRMZM2G178415_P06	2.2254	2.62973	2.53799	2.2701	2.56663	2.55933	2.16071	2.47329	2.28608	1.95068	2.0989	2.11953	2.39006	2.72649	2.74158	2.19306	2.77855	2.50855	2.51136	2.90212	2.66309	2.29863	2.82429	2.58386
GRMZM2G312110_P01	2.27923	2.3794	1.88349	2.23337	2.28237	1.85586	2.23223	2.33508	1.79226	2.19454	2.41941	1.88444	2.2538	2.37533	1.91056	2.17161	2.22127	1.84564	2.30308	2.42229	1.92495	2.33214	2.56485	1.9028
GRMZM2G424181_P01	2.02588	1.50124	1.23777	1.89531	1.38482	1.19319	2.09951	1.62594	1.38381	1.98061	1.61405	1.24629	1.95466	1.34898	1.17102	1.84059	1.44552	1.15712	2.06913	1.48513	1.28574	2.13431	1.59432	1.32507
GRMZM2G004932_P01	1.50686	2.1694	1.8571	1.62724	2.16682	1.94629	1.36047	2.02517	1.75592	1.61198	2.28809	1.88582	1.50417	1.98654	2.01229	1.40278	2.1136	1.90426	1.51628	2.02474	1.75649	1.47022	2.22563	1.88182
GRMZM2G024533_P01	0.346936	0.617111	0.209465	0.350289	0.660064	0.255464	0.477209	0.719513	0.279995	0.492798	0.614952	0.32524	0.283543	0.594735	0.222519	0.347473	0.616631	0.237952	0.318911	0.557002	0.219113	0.38284	0.619991	0.250251
GRMZM2G024882_P01	0.390781	0.624428	0.396034	0.399516	0.643754	0.405668	0.377659	0.605489	0.328135	0.369584	0.669716	0.361336	0.386588	0.619983	0.401446	0.377504	0.651678	0.413536	0.35192	0.554661	0.336886	0.346447	0.630291	0.35696
GRMZM2G027021_P01	2.17816	1.26636	1.2444	2.51957	1.55437	1.4719	1.89245	1.12356	1.15549	2.43097	1.56412	1.51531	2.26424	1.33675	1.40059	2.56775	1.58349	1.61205	2.05311	1.31118	1.29577	2.09374	1.26016	1.3045
GRMZM2G028096_P02	0.649932	0.895189	1.14721	0.712816	0.908916	1.15692	0.655076	0.847502	1.12939	0.658098	0.945818	1.1043	0.536509	0.801686	1.10407	0.624019	0.838142	1.13367	0.561007	0.833151	1.06821	0.602544	0.929596	1.15623
GRMZM2G047042_P03	2.49984	2.21783	2.50181	2.37886	2.01372	2.43498	2.42868	2.05394	2.2947	2.37912	2.10422	2.25379	2.56922	2.15835	2.76813	2.51102	2.2082	2.71781	2.66453	2.107	2.57805	2.56872	2.13674	2.45073
GRMZM2G052148_P01	1.26042	1.64306	1.57354	1.50355	1.7983	1.75784	1.33913	1.49172	1.49881	1.4807	1.76772	1.72	1.3213	1.52339	1.55818	1.32803	1.62746	1.62801	1.38812	1.59594	1.65303	1.37875	1.55241	1.61059
GRMZM2G053999_P01	3.92649	4.44575	4.95465	3.88865	4.19806	4.90903	3.02017	3.75051	4.00886	3.13103	3.7857	4.03167	3.55915	4.12993	4.53557	3.72849	4.15385	4.64815	2.81146	3.68509	3.82684	2.93455	3.85112	4.08523
GRMZM2G063949_P01	2.08	2.07325	2.28462	2.70728	2.60443	2.82468	2.25842	2.12613	2.33195	2.78477	2.61379	2.80227	2.05526	2.02262	2.25649	2.37758	2.28272	2.64267	2.45007	2.13833	2.4689	2.28663	2.13874	2.38842
GRMZM2G074599_P01	1.33276	0.96191	1.48227	1.5987	1.22025	1.83194	1.35079	1.07708	1.68838	1.65497	1.32383	2.07124	1.43978	1.05613	1.58243	1.51383	1.10961	1.754	1.60578	1.14784	1.83681	1.5034	1.10334	1.75293
GRMZM2G083309_P01	0.672821	0.725535	0.499949	0.658127	0.76525	0.466235	0.634168	0.739274	0.527951	0.657807	0.773733	0.489187	0.567404	0.71615	0.510609	0.583248	0.74573	0.446394	0.62171	0.733042	0.536009	0.604715	0.801286	0.523666
GRMZM2G088753_P01	1.24094	1.22784	1.04538	1.38193	1.18874	1.06605	1.32368	1.1971	1.10551	1.3759	1.21135	1.06885	1.50329	1.40993	1.24739	1.46621	1.38119	1.25154	1.37295	1.18615	1.12577	1.3351	1.19769	1.08952
GRMZM2G108348_P03	2.84588	2.26397	2.23509	3.2864	2.81135	2.74015	2.43748	1.98187	2.02206	3.37906	2.88446	2.73764	2.71069	2.18078	2.3182	2.89771	2.43305	2.37917	2.99629	2.37991	2.51799	2.44649	2.06462	2.04969
GRMZM2G119146_P01	2.39547	2.18225	2.63831	2.35664	2.17007	2.72544	2.84501	2.42845	3.11549	2.86695	2.3793	3.21371	2.61532	2.06941	2.44238	2.50363	2.17242	2.48698	2.51019	2.41221	2.661	2.90678	2.18589	2.71668
GRMZM2G145870_P02	2.14706	2.80429	2.45071	2.46267	3.16946	2.48544	1.85205	2.66914	2.13792	2.24402	3.09152	2.38053	1.68104	2.36761	2.1126	1.88326	2.69541	2.17337	1.85538	2.60317	2.1015	1.87452	2.59938	2.15794
GRMZM2G148896_P02	1.13295	1.08277	0.872585	1.26007	1.12637	0.918898	1.17994	1.043	0.866724	1.31908	1.11955	0.943581	1.27693	1.12936	0.83329	1.26908	1.15158	0.891407	1.27716	1.12802	0.822723	1.28478	1.21935	0.850791
GRMZM2G168791_P01	1.708	1.51186	1.59877	1.80762	1.68774	1.84085	2.19191	2.41242	2.6877	2.3059	2.43703	2.65117	1.77842	1.60863	1.79622	1.90693	1.57859	1.92786	2.58385	2.87364	3.24923	2.71736	2.8901	3.24819
GRMZM2G351018_P01	0.701939	0.70086	0.892343	0.714134	0.629086	0.91225	0.802075	0.610724	0.961582	0.766096	0.679272	0.893827	0.729359	0.593913	0.736838	0.698152	0.527971	0.841875	0.824269	0.61668	0.920545	0.763975	0.641493	0.84074
GRMZM2G409627_P01	0.354341	0.409008	0.354742	0.350961	0.512287	0.375315	0.380581	0.503633	0.37031	0.414218	0.581213	0.402136	0.329038	0.449743	0.32233	0.321742	0.433222	0.398304	0.422518	0.547252	0.398615	0.426602	0.563643	0.378249
GRMZM2G423137_P01	2.77995	1.91967	1.58946	2.37197	1.64346	1.31482	4.15103	2.87168	2.48196	3.51293	2.69187	2.19187	2.73392	1.89653	1.63105	2.45579	1.82692	1.41904	4.47405	3.01294	2.6405	4.52036	3.13694	2.73131
GRMZM2G438722_P04	1.17961	1.84161	1.82498	1.0919	1.82999	1.95634	1.4326	1.95856	1.96646	1.24713	1.97309	2.1083	1.15978	1.66872	1.61728	1.1342	1.8881	1.75581	1.33867	1.87103	1.84264	1.41611	1.96891	1.92819
GRMZM2G463464_P02	1.84069	1.78077	2.17145	2.20311	1.9229	2.28583	2.10389	2.08694	2.05404	2.56912	2.05328	2.45246	1.90128	1.85059	2.28503	2.1143	2.11526	2.28866	2.22261	2.19701	2.26162	2.045	1.99325	2.2009
GRMZM2G566786_P03	3.09665	2.61653	2.72925	2.93969	2.51162	2.76601	2.91187	2.36501	2.48137	2.84808	2.3347	2.53885	3.07696	2.55074	2.72677	3.22485	2.74191	2.70079	2.95658	2.41241	2.51923	2.94532	2.46707	2.53774
AC217050.4_FGP007	2.03542	1.638	1.82605	2.56203	2.05372	2.25467	1.53229	1.24747	1.44644	1.81137	1.34566	1.67847	1.80052	1.49486	1.73011	2.07625	1.63545	1.96629	1.67587	1.35618	1.59063	1.50625	1.22866	1.50732
GRMZM2G002165_P01	2.66856	2.09627	2.61399	2.25881	1.86855	2.14229	1.58684	1.34158	1.69666	1.39984	1.11824	1.57555	2.5989	2.08555	2.49619	2.44899	2.0197	2.33215	1.54313	1.24358	1.55408	1.49493	1.22652	1.58909
GRMZM2G017016_P02	0.917495	1.45927	1.44477	1.11059	1.79058	1.64709	1.24698	2.02385	1.83711	1.2262	2.25864	1.98504	0.977566	1.50616	1.5172	1.14753	1.92505	1.7795	1.22384	2.10838	1.97945	1.1498	1.92808	1.80984
GRMZM2G024099_P01	2.00102	2.77554	2.41921	2.49839	3.59774	3.298	2.74033	3.79538	3.77818	2.7325	3.87421	3.5454	1.45766	2.07104	1.88748	1.67571	2.49241	2.18322	1.92156	2.67866	2.33617	1.97284	2.71503	2.55233
GRMZM2G049693_P02	2.02678	2.72758	2.68554	2.10003	2.59245	2.59135	2.15035	2.59825	2.62587	2.0306	2.48449	2.51161	1.91446	2.57529	2.44444	1.86881	2.29657	2.40644	1.95268	2.3293	2.43829	1.95629	2.39607	2.29646
GRMZM2G057616_P01	1.73365	1.99949	1.6724	1.65462	2.01469	1.73086	1.66529	1.80102	1.46657	1.58298	1.74829	1.52589	1.73675	1.88376	1.72043	1.70145	1.94952	1.71872	1.40545	1.77021	1.56709	1.51979	1.83301	1.59803
GRMZM2G060296_P02	1.32349	1.52907	1.56066	1.14977	1.35623	1.3333	1.22625	1.42308	1.44878	1.15608	1.44753	1.3333	1.35318	1.66833	1.70236	1.15266	1.42138	1.46048	1.30483	1.53108	1.59453	1.33374	1.6233	1.56659
GRMZM2G061662_P01	2.55005	2.39785	2.24567	2.63999	2.46684	2.20186	2.44938	2.23843	1.97514	2.51428	2.45075	2.09168	2.42766	2.29596	2.13855	2.41156	2.44587	2.11884	2.54034	2.32107	2.11314	2.46675	2.38323	2.11512
GRMZM2G067265_P02	2.7373	2.74241	2.03432	2.83976	2.90819	2.13212	2.84959	3.01177	2.06148	3.08401	3.06603	2.25115	2.7373	2.81859	2.10088	2.7496	2.68815	2.08639	3.06242	2.90161	2.18051	2.94002	2.86325	2.15315
GRMZM2G069208_P01	1.9937	1.90359	2.35845	2.04723	1.88368	2.87657	2.04587	1.9861	2.86241	2.00223	2.08189	2.738	1.7687	1.58555	2.45049	1.81157	1.77659	2.43836	2.23013	1.83489	2.56302	2.10057	1.94772	2.71271
GRMZM2G069382_P01	0.594275	0.394791	0.430006	0.444451	0.342426	0.32431	0.394735	0.307324	0.324097	0.368833	0.274117	0.262252	0.67847	0.468694	0.508049	0.528081	0.378364	0.384317	0.49885	0.413069	0.38483	0.492304	0.421216	0.382138
GRMZM2G078569_P03	1.95449	2.04153	2.28269	2.22315	2.38817	2.66215	1.88995	2.02521	2.21172	2.32657	2.51418	2.86083	1.90589	1.89614	2.12145	1.94982	2.10596	2.38422	1.93699	1.99687	2.26248	1.81316	2.03194	2.21447
GRMZM2G090905_P01	2.32475	1.48526	1.2945	2.0556	1.39402	1.19243	1.90605	1.32653	1.0358	1.87223	1.30938	1.0837	2.15477	1.52239	1.21369	2.07444	1.41793	1.16361	1.73789	1.27524	1.02031	1.87428	1.26926	0.995973
GRMZM2G095534_P04	0.996348	0.825317	0.91575	1.33135	0.945391	1.16262	0.992801	0.785293	0.853439	1.33281	1.0548	1.13941	0.961085	0.758	0.91374	1.14293	0.855714	1.09894	1.123	0.843221	0.924247	1.11967	0.932262	0.991857
GRMZM2G099696_P01	1.721	2.02773	1.77865	1.95602	2.29119	1.98826	2.22431	2.37987	2.14591	2.43	2.51517	2.29448	1.6457	2.01206	1.82847	1.85264	2.0801	1.88114	1.99179	2.35983	1.99929	2.17853	2.33404	2.08381
GRMZM2G101617_P01	3.42852	2.96778	2.73214	3.00271	2.52057	2.29812	3.27468	2.77951	2.75883	2.53293	2.48929	1.95172	3.4742	3.04597	3.06048	3.22111	2.88507	2.54236	2.91995	2.60899	2.23262	3.1459	2.70282	2.42374
GRMZM2G105991_P01	2.90445	1.94837	2.12858	2.40404	1.70223	1.82214	2.20812	1.47163	1.53539	2.01564	1.42344	1.45385	3.19718	2.33629	2.5534	2.78157	1.98879	2.11799	2.32384	1.53934	1.73234	2.16516	1.58992	1.65631
GRMZM2G119691_P01	2.19153	1.69295	1.89429	2.28831	1.74627	1.86317	2.04328	1.63004	1.79723	2.32896	1.80233	1.85175	2.19441	1.70324	2.00517	2.48031	1.9544	1.95415	2.34222	1.84331	1.95949	2.13099	1.62746	1.67475
GRMZM2G123499_P01	1.3184	0.785915	1.68793	1.43763	0.723769	1.6191	1.90366	0.866459	1.82735	1.52628	0.745681	1.54709	1.46292	0.786289	1.66218	1.37456	0.731472	1.61655	1.46071	0.636794	1.46553	1.51584	0.72362	1.57427
GRMZM2G126453_P01	2.73309	1.55823	1.91298	2.70005	1.82836	1.80447	2.73028	1.91249	2.03051	2.48796	1.66647	1.86765	2.33325	1.55298	1.84058	2.10323	1.67644	1.76203	2.50845	1.76237	1.94639	2.40369	2.04266	1.83539
GRMZM2G137151_P01	2.50586	2.08871	2.17795	3.09314	2.38671	2.39388	2.76733	2.3882	2.36531	3.4609	3.02356	2.89945	2.65641	2.2492	2.22248	2.64174	2.23111	2.30629	2.95674	2.21579	2.2416	2.91788	2.41672	2.39304
GRMZM2G147811_P01	0.372715	0.26947	0.127395	0.404836	0.243752	0.130386	0.385105	0.220517	0.126312	0.350422	0.261087	0.123076	0.37673	0.236999	0.126789	0.367285	0.253014	0.11846	0.376195	0.249392	0.12764	0.366712	0.26577	0.119943
GRMZM2G156320_P01	1.99643	1.46777	1.31123	2.01838	1.46256	1.37266	2.07992	1.40925	1.36388	2.12423	1.34272	1.36827	2.14967	1.39041	1.42012	2.09079	1.29996	1.31588	2.25388	1.29542	1.42358	2.2867	1.3319	1.42438
GRMZM2G168706_P04	2.0619	1.88194	2.08594	2.42906	2.06839	2.53172	2.0502	1.70494	2.0193	2.33376	1.79117	2.40815	1.93278	1.61259	1.87907	2.16209	1.72401	2.04418	2.04871	1.60595	2.01424	1.98149	1.61102	2.0174
GRMZM2G464401_P01	1.88012	1.66829	1.89932	1.81219	1.67901	1.87553	2.07431	1.91109	2.30293	1.84117	1.84813	2.00597	1.79099	1.67016	1.94611	1.74824	1.64617	1.93558	1.90095	1.74945	1.93578	1.95203	1.82771	2.09878
GRMZM5G838196_P02	8.02536	8.53828	8.98678	7.38566	8.00687	8.05571	12.1156	12.1645	12.6102	11.4258	11.8724	11.8402	8.16267	8.78355	9.05847	8.0819	8.99815	8.731	12.0841	12.1151	12.534	12.7189	12.5213	13.1837
GRMZM5G862131_P01	1.80819	1.91375	1.93764	1.91199	1.97864	2.23049	1.65337	1.75827	1.90977	1.88506	2.02497	2.12688	1.71723	1.94414	2.05822	1.7092	1.84417	1.91987	1.79035	1.85505	2.09962	1.5246	1.681	1.7175
GRMZM5G896082_P02	2.83226	2.96236	3.7525	2.36012	2.42323	3.16148	2.60433	2.67377	3.21551	2.22988	2.3642	3.02714	3.19493	3.28422	4.24295	2.75226	2.88355	3.69246	2.62033	2.68576	3.60652	2.40588	2.72292	3.30145
GRMZM2G010937_P01	1.94446	2.04918	1.94294	1.87575	2.03173	1.84361	1.74846	1.86575	1.76587	1.77785	1.92869	1.83281	1.98923	2.12044	1.99329	1.9974	2.16801	2.01219	1.80802	1.88423	1.79789	1.85882	1.95196	1.8114
GRMZM2G028914_P01	1.35066	1.97654	1.57363	1.35161	1.89333	1.59491	1.41303	2.03674	1.62796	1.29032	1.87406	1.50011	1.38735	2.01726	1.71293	1.32688	2.06683	1.64796	1.42893	2.10224	1.65956	1.45122	2.033	1.68294
GRMZM2G042074_P01	1.26713	1.53549	0.928917	1.34868	1.57347	1.02005	1.07815	1.51394	0.809168	1.19224	1.51379	0.879401	1.06622	1.49288	0.831371	0.996711	1.41994	0.892036	1.02608	1.45713	0.81242	1.02479	1.49336	0.826633
GRMZM2G048497_P01	2.78788	2.36882	2.34433	2.8297	2.29445	2.31308	3.35776	2.92143	3.02029	3.06284	2.80639	2.63828	2.72663	2.25666	2.40752	2.74795	2.3539	2.32137	3.26602	3.09545	2.95638	3.22123	2.9029	2.99875
GRMZM2G052926_P01	1.36663	1.13836	1.14804	1.40951	1.5439	1.2611	1.38938	1.1821	0.985882	1.28965	1.35234	1.35661	1.4793	1.17386	1.03703	1.30429	1.33853	1.08656	1.3997	1.21009	1.0465	1.36154	1.06081	1.07827
GRMZM2G067176_P01	2.31383	3.14935	3.20809	2.1264	2.98045	2.93096	2.15402	2.9251	2.98536	2.0643	2.92383	2.82056	2.23758	3.27443	3.26345	2.11955	3.1759	3.07336	1.9707	2.75268	2.92616	2.01362	2.81826	2.79207
GRMZM2G072091_P01	1.53046	2.26388	1.94022	1.44872	2.05639	1.86013	1.50817	2.13815	1.82712	1.39515	2.04821	1.75387	1.506	2.13461	1.96307	1.45987	2.04202	1.79743	1.53309	2.10633	1.87732	1.61855	2.21041	1.98084
GRMZM2G081653_P02	2.26284	2.57575	2.51041	2.46246	2.86426	2.80859	2.0754	2.46478	2.28498	2.50464	2.86348	2.74332	2.30479	2.75173	2.65564	2.34382	2.76661	2.57443	2.6684	2.96139	2.80634	2.37765	2.75199	2.61628
GRMZM2G086464_P01	2.6053	2.52065	2.45595	2.42698	2.39237	2.27314	2.5535	2.53744	2.50759	2.25561	2.32289	2.13568	2.81584	2.67132	2.75948	2.60479	2.68939	2.45498	2.31075	2.47891	2.16259	2.42723	2.38703	2.2506
GRMZM2G093359_P01	3.60102	2.96214	3.21262	2.94388	2.97102	3.04096	1.04746	1.7764	1.39427	1.16484	1.85633	1.4178	3.12677	3.12091	3.27906	2.89871	3.36479	2.93096	1.06949	1.94774	1.42384	1.14783	2.00067	1.3005
GRMZM2G100120_P06	1.52975	1.41008	1.63802	1.8465	1.62159	1.89137	1.4847	1.35501	1.61242	1.78218	1.68898	1.85768	1.52626	1.36945	1.71416	1.65172	1.577	1.76404	1.61986	1.4796	1.7974	1.55903	1.49828	1.7249
GRMZM2G104632_P01	6.65412	6.96436	7.85132	8.06276	8.17289	8.35037	6.58274	6.47364	6.69321	7.14536	7.2744	7.33171	5.11463	5.41344	5.54318	5.90607	6.15234	6.41286	5.63945	5.5189	5.70171	5.89487	6.03001	6.11563
GRMZM2G107639_P01	2.14602	2.13431	2.14651	2.04356	2.24613	2.0716	2.14747	2.13955	2.07421	2.02049	2.15764	2.02188	2.19527	2.264	2.51476	1.95087	2.26597	2.25204	2.35987	2.40219	2.42096	2.13646	2.39021	2.49804
GRMZM2G124732_P01	2.08504	1.83731	2.00124	2.55986	2.10149	2.47448	2.05329	2.09395	2.00438	2.75493	2.78336	2.69599	1.92648	1.76433	1.90864	2.32526	1.94927	2.07501	2.54971	2.11528	2.45976	2.74542	2.35501	2.3805
GRMZM2G132991_P01	1.16566	1.29318	1.19241	1.41324	1.26021	1.03464	1.08243	1.23565	0.966817	1.24963	1.34929	1.00924	1.1732	1.13455	0.959474	1.24196	1.28141	1.16915	1.50401	1.22104	0.829341	1.16987	1.22466	0.838928
GRMZM2G152925_P01	2.38371	1.96419	1.90693	2.58382	2.28645	2.23473	3.51662	3.14274	2.98985	2.63529	2.62025	2.2039	2.369	2.04722	2.09444	2.85813	2.75737	2.65483	2.88822	2.69594	2.4958	2.76521	2.48585	2.41951
GRMZM2G155889_P04	2.24591	2.09487	1.61994	2.27486	2.19508	1.65413	2.28733	2.15082	1.57682	2.38665	2.17423	1.73906	2.05639	2.007	1.49822	2.22007	2.01849	1.52788	2.26328	2.13487	1.69481	2.26551	2.22465	1.68914
GRMZM2G162800_P01	1.46066	2.05721	1.76188	1.51851	2.1432	2.04977	1.45742	1.90249	1.80465	1.56798	2.12278	2.02911	1.44078	1.89994	1.7712	1.56886	2.12534	1.97482	1.46772	1.86264	1.77376	1.51807	1.8864	1.83481
GRMZM2G162992_P02	2.80708	2.89985	2.35617	2.8198	2.92554	2.44426	2.78495	2.88254	2.64407	2.82617	3.06232	2.39246	2.59522	2.70305	2.22273	2.6663	2.87013	2.36644	2.61651	2.8329	2.20554	2.88397	2.82367	2.36835
GRMZM2G163749_P01	3.16799	3.18517	3.69703	3.26369	3.03067	3.36497	2.59155	2.29194	2.93408	2.48168	2.34242	2.89702	2.74911	2.76456	3.22001	2.94695	2.85306	3.31301	2.41144	2.24176	2.68449	2.38759	2.29042	2.88939
GRMZM2G171080_P01	1.18987	1.41536	1.33547	1.53973	1.62694	1.46194	1.31614	1.36153	1.29903	1.57715	1.52818	1.56208	1.20481	1.19035	1.18985	1.41491	1.26187	1.40994	1.31099	1.27891	1.28799	1.44638	1.33687	1.4537
GRMZM2G175171_P01	1.47471	1.5443	1.42005	1.54096	1.44307	1.46692	1.49837	1.52848	1.51949	1.51301	1.48223	1.48489	1.4719	1.47336	1.50197	1.35419	1.38174	1.40163	1.50503	1.50824	1.61248	1.64182	1.63858	1.59256
GRMZM2G325019_P01	0.953172	0.685169	0.916654	1.15935	0.876024	1.15422	0.914133	0.705072	0.953246	1.23423	0.953525	1.30049	0.947917	0.654291	0.85794	0.958427	0.751627	0.935603	0.904842	0.685169	0.919548	0.927928	0.689122	0.9623
GRMZM2G341747_P01	1.14907	1.11814	0.839636	1.12648	1.06334	0.807501	1.29189	1.12794	0.893883	1.29938	1.06258	0.883448	1.17381	1.21999	0.889825	1.21566	1.03774	0.82713	1.39332	1.13415	0.931566	1.35039	1.23612	0.927011
GRMZM2G379286_P01	1.82899	2.09586	1.80506	1.69245	1.97387	1.90242	1.78015	1.95085	1.74214	1.7969	2.09889	1.90454	1.72329	1.90278	1.88356	1.77836	1.94862	1.94033	1.69174	1.92641	1.90608	1.70813	2.10273	1.91589
GRMZM2G440349_P01	0.73789	0.705559	0.818976	0.806384	0.786523	0.89194	1.20255	1.00032	1.25998	1.25415	1.09729	1.47056	0.801652	0.70722	0.875141	0.842959	0.698585	0.981533	1.12189	0.970169	1.33982	1.23252	1.03433	1.36205
GRMZM2G449355_P02	0.116956	0.105996	0.253926	0.123718	0.115914	0.206366	0.132634	0.122513	0.260028	0.116862	0.13073	0.234166	0.122205	0.119881	0.238597	0.116699	0.140553	0.261869	0.137104	0.13746	0.279425	0.133821	0.126952	0.265622
GRMZM2G458549_P01	1.95039	1.99046	2.0671	2.01896	1.99418	2.08856	2.40729	2.28966	2.32291	2.0759	2.24375	2.20959	1.90294	1.90432	2.12335	1.80416	1.8486	2.0996	2.45145	2.28456	2.51331	2.38889	2.44446	2.57559
GRMZM2G462325_P01	1.98211	2.2368	2.65836	2.12348	2.28196	2.88053	1.85198	2.24189	2.08626	1.99512	2.59227	2.31411	1.79855	2.05548	2.49748	1.62918	2.21827	2.47228	1.74827	2.11453	2.00792	1.8713	2.2588	2.08305
GRMZM2G021110_P01	2.33165	3.00137	2.13874	2.0803	2.65695	2.02507	1.66675	1.88436	1.53862	1.56365	1.94127	1.44085	2.14816	2.91351	2.07254	2.04247	2.77867	1.91903	1.56956	1.89428	1.45304	1.59747	1.9296	1.41211
GRMZM2G024933_P02	3.19797	3.59922	3.70858	3.12888	3.43915	3.63445	3.19702	3.71021	3.67389	3.07976	3.67907	3.60706	3.12286	3.61571	3.69872	3.00275	3.719	3.46282	3.1311	3.50362	3.46282	3.13966	3.73402	3.75167
GRMZM2G035820_P01	1.67844	1.57142	1.80245	2.04787	2.00581	2.20338	1.49356	1.62929	1.60074	2.09501	2.10384	2.31383	1.58517	1.65677	1.76034	1.83767	1.82714	1.90514	1.65479	1.62588	1.75946	1.60749	1.57987	1.65465
GRMZM2G037683_P01	1.58958	1.56319	1.80853	1.50556	1.43945	1.68391	1.52974	1.54516	1.84225	1.48655	1.52091	1.81842	1.40771	1.42997	1.6775	1.42436	1.47443	1.56938	1.52503	1.45577	1.7891	1.53147	1.57112	1.81091
GRMZM2G042818_P01	2.84971	2.36902	2.63883	3.2267	2.54878	2.79566	2.16886	1.72777	1.98293	2.48139	1.93197	2.14631	2.76847	2.29759	2.60447	2.85491	2.31968	2.62205	2.27179	1.87463	2.11327	2.37818	1.93056	2.09648
GRMZM2G043162_P01	2.5626	3.50073	2.77397	2.81666	3.63432	2.93422	2.86794	2.78077	3.36827	2.77353	3.10085	3.10607	2.10815	2.47091	2.53345	2.21019	2.79889	2.69309	2.84164	2.90792	3.30356	2.81929	2.80561	3.28738
GRMZM2G050845_P01	1.1208	1.83494	1.34698	1.36674	2.21677	1.72894	1.23838	1.69764	1.41379	1.46592	2.02959	1.7582	1.22935	1.81965	1.41518	1.31047	2.02942	1.55183	1.09818	1.66306	1.41214	1.17015	1.70894	1.37294
GRMZM2G063617_P01	2.93287	3.39386	3.14414	3.60533	3.67847	3.99609	3.66227	3.53917	3.71189	3.79533	4.20379	4.22491	2.58795	3.08051	3.32952	3.11387	3.24666	3.49036	3.09799	3.26245	3.40679	3.20438	3.59508	3.6963
GRMZM2G067242_P01	1.31787	1.36058	1.17142	1.57896	1.6046	1.50686	1.44617	1.4175	1.31019	1.73224	1.71218	1.54837	1.34364	1.34152	1.21042	1.59601	1.54963	1.50483	1.52585	1.52313	1.42061	1.45925	1.49088	1.3273
GRMZM2G078360_P01	1.24205	2.19705	1.99932	1.31197	2.19684	2.0796	1.25715	2.10195	2.01859	1.29535	2.26844	2.11934	1.22302	2.01354	1.94514	1.20513	1.95703	1.99451	1.22746	2.11381	1.9052	1.23787	2.15134	1.93831
GRMZM2G083130_P01	1.67579	2.29592	2.48662	1.71128	2.54142	2.74443	1.15494	1.73321	2.01413	1.30151	1.88925	2.21286	0.995572	1.58886	1.84993	1.24134	1.90537	2.09598	0.885416	1.48958	1.75135	1.03414	1.55639	1.8447
GRMZM2G103955_P02	1.70063	2.43029	2.48968	1.69118	2.42653	2.33597	1.47666	1.63862	1.66041	1.4731	1.72729	1.63191	1.50947	2.21744	2.33761	1.49628	2.32516	2.23319	1.27694	1.54971	1.6207	1.37573	1.68495	1.69054
GRMZM2G111491_P01	0.279394	0.552249	0.464949	0.232994	0.493597	0.473841	0.218425	0.445514	0.481711	0.221226	0.467437	0.48304	0.276593	0.589136	0.556272	0.261539	0.449334	0.557908	0.256934	0.473977	0.528625	0.252895	0.528757	0.453655
GRMZM2G113613_P01	1.31847	2.00058	1.85555	1.32101	2.1048	1.93345	1.16222	1.81417	1.73203	1.23198	1.95267	1.82172	1.29184	2.14329	2.06913	1.25506	2.15131	1.97925	1.27015	2.03345	1.85346	1.14929	1.79974	1.75541
GRMZM2G119886_P01	1.42053	1.60654	1.51196	1.43129	1.58577	1.57763	1.50572	1.54019	1.58486	1.4039	1.64806	1.54441	1.26292	1.34133	1.43014	1.25288	1.35069	1.40061	1.30351	1.36552	1.46567	1.41924	1.56189	1.48474
GRMZM2G124455_P01	2.98718	3.04206	2.90322	3.38053	3.47341	3.57572	2.62014	2.66784	2.53661	3.14056	3.37504	3.04722	2.95556	3.15692	3.15808	3.14322	3.51923	3.23844	2.98423	2.95225	2.9041	2.78859	2.81325	2.63662
GRMZM2G137321_P01	1.69861	1.13586	1.52949	1.55715	0.979513	1.28533	1.48146	0.920098	1.35392	1.32033	0.821596	1.17772	2.24726	1.51122	2.18506	1.70701	1.09486	1.63726	2.56851	1.8475	2.5749	2.41966	1.68935	2.25632
GRMZM2G154523_P01	3.31577	3.53654	3.07272	5.85557	6.4637	5.15856	1.34663	1.57855	1.31325	1.57308	1.92627	1.45353	1.80482	2.19207	1.86692	2.35838	2.90602	2.39829	1.29257	1.6163	1.34391	1.45318	1.78054	1.39283
GRMZM2G163421_P01	5.60812	5.31306	5.48898	8.22424	8.07516	8.05586	3.79953	3.61554	3.90094	4.66448	4.80547	5.25382	4.98718	5.11387	5.1758	6.7123	6.99809	6.6482	4.15093	4.11273	4.39174	3.85322	3.96607	4.08465
GRMZM2G181362_P01	1.47932	1.73167	1.97987	1.6239	1.70788	2.0821	1.41753	1.64422	1.96654	1.52986	1.65669	1.91664	1.38169	1.49491	2.04856	1.45923	1.56152	2.01947	1.57485	1.53396	1.94492	1.53361	1.66916	2.0419
GRMZM2G327311_P02	1.08379	1.17065	1.20979	1.02373	1.14533	1.14236	1.14064	1.29401	1.24506	1.15563	1.27038	1.20324	1.10853	1.17295	1.25971	1.02148	1.24276	1.22862	1.24321	1.33694	1.35406	1.22298	1.36697	1.35716
GRMZM2G364901_P04	2.53415	2.17142	2.3347	2.47296	2.10845	2.22876	2.29886	1.98466	2.00028	2.29272	1.90323	1.91691	2.44531	2.10714	2.28334	2.47373	1.95252	2.21171	2.25969	1.83439	1.97863	2.22257	1.93819	2.04566
GRMZM2G396292_P03	2.54706	2.11921	2.10389	2.65074	2.14648	2.01856	2.58405	2.03635	2.17813	2.38918	2.06279	1.98071	2.3376	1.82214	1.93135	2.32379	1.86253	1.91525	2.46083	1.92435	1.8958	2.70675	2.02615	1.97632
GRMZM2G409865_P01	1.58289	2.23348	2.23132	1.63003	2.2264	2.3517	1.63855	2.3623	2.21821	1.70788	2.36518	2.29506	1.51614	2.09913	2.13381	1.59464	2.16664	2.24953	1.65512	2.19231	2.25552	1.67475	2.35455	2.26485
GRMZM2G481843_P01	2.60416	2.75846	2.15677	3.02997	3.2777	2.66035	2.3915	2.51034	1.93978	2.76754	3.17806	2.3368	2.29194	2.48283	1.97545	2.41959	2.7113	2.06439	2.20847	2.43821	1.91679	2.28684	2.6431	1.94966
GRMZM2G488458_P01	3.25736	2.46771	1.90614	3.20766	2.24676	1.81335	3.43314	2.40316	2.01068	3.27415	2.44136	1.86841	3.04078	2.34176	1.90248	3.07139	2.31904	1.78466	3.28501	2.2864	1.81874	3.4305	2.49382	1.89555
GRMZM5G877941_P01	1.72966	1.73939	2.16957	1.60471	1.55322	1.94305	1.65794	1.64924	2.03568	1.54538	1.51931	1.78865	1.61484	1.66188	2.13264	1.64729	1.64509	2.08794	1.58988	1.57692	1.87783	1.6103	1.65495	1.96464
GRMZM2G001457_P02	1.15422	1.26016	1.29113	1.00687	1.08158	1.14719	1.05198	1.09701	1.14137	0.840628	1.03646	0.965782	1.46058	1.6461	1.65318	1.23197	1.40402	1.41367	1.21204	1.25823	1.25138	1.04172	1.21645	1.1363
GRMZM2G025659_P01	2.8719	2.90986	2.75314	2.33811	2.35217	2.47419	2.5365	2.59641	2.62226	2.26647	2.16013	2.41691	2.78741	2.92802	2.67323	2.5522	2.48209	2.35848	2.31385	2.28977	2.34159	2.33355	2.28154	2.3602
GRMZM2G030805_P01	1.72338	1.35031	1.27745	2.01052	1.55772	1.36616	1.75426	1.1411	1.22177	1.90604	1.41542	1.3949	1.78391	1.43623	1.4801	1.82291	1.48105	1.45669	2.09611	1.32552	1.4628	1.90286	1.29264	1.34014
GRMZM2G038013_P01	3.18749	2.56843	2.85782	3.02502	2.66754	2.88336	4.03577	3.43002	3.81286	3.41187	3.55644	3.46531	2.90634	2.6194	2.77669	3.14793	3.09637	2.92407	3.0371	3.00626	2.94905	3.24849	3.05554	3.33084
GRMZM2G048806_P01	1.2863	1.28898	0.745161	1.3584	1.25776	0.777699	1.21907	1.27273	0.775337	1.1804	1.23859	0.706071	1.21498	1.27692	0.733655	1.29757	1.29837	0.794387	1.18796	1.17513	0.741351	1.25531	1.19151	0.72634
GRMZM2G057394_P01	1.56537	1.12941	1.52184	1.65285	1.20422	1.5305	1.65754	1.11143	1.5193	1.67436	1.22297	1.56738	1.55777	0.999112	1.38058	1.53481	1.02131	1.42807	1.62084	1.10133	1.4757	1.73646	1.21021	1.57664
GRMZM2G058138_P01	1.69299	1.37314	1.12818	1.9992	1.56228	1.37217	1.97076	1.40645	1.38308	2.41672	1.79415	1.75179	1.60265	1.27889	1.12213	1.83448	1.36746	1.34214	2.51001	1.69577	1.4938	1.97319	1.52187	1.4067
GRMZM2G069008_P03	1.96319	2.6732	2.38641	1.92668	2.78376	2.55709	1.73313	2.23122	2.01325	1.72495	2.13611	2.06823	2.05079	2.86955	2.51716	2.06356	2.7089	2.3876	1.82392	2.3282	2.03955	1.71378	2.26905	2.0307
GRMZM2G072034_P01	2.67935	2.41152	2.81705	2.59223	2.4335	2.87764	2.42785	2.15065	2.43076	2.35992	2.07738	2.41028	2.59649	2.33067	2.78619	2.63912	2.48552	2.77693	3.07205	2.61864	3.08888	2.63299	2.49212	2.81228
GRMZM2G077361_P01	2.576	2.39534	2.08366	2.37055	2.29063	1.96869	2.93745	2.69415	2.30593	2.71084	2.73642	2.2142	2.79853	2.56053	2.31216	2.49086	2.50733	2.14613	3.1406	2.8642	2.48441	2.97517	2.95141	2.48483
GRMZM2G088880_P03	2.95973	1.99406	2.44699	2.83178	2.01669	2.67197	2.82107	1.9095	2.39031	3.21159	2.67198	2.9147	2.40797	1.73935	2.03916	2.47571	1.96402	2.09288	2.48874	1.78935	2.03275	2.80341	1.91505	2.41126
GRMZM2G093557_P01	1.75656	1.74737	2.41314	2.25619	1.97381	2.7694	1.58574	1.62473	1.99368	1.92214	2.18358	2.36992	1.69323	1.74468	2.38456	1.88034	1.98188	2.47333	2.02239	1.93742	2.30578	1.88341	1.80653	2.29021
GRMZM2G099626_P01	1.91093	1.66922	2.01927	2.02925	1.70956	2.04414	2.79049	1.8974	2.64407	2.58088	2.05009	2.39296	2.01475	1.6812	2.20472	2.0363	1.86304	2.23039	2.80812	1.98012	2.80346	2.82927	2.14936	2.66099
GRMZM2G103266_P07	1.16739	1.50521	1.16436	1.22882	1.56495	1.20066	2.2158	2.52143	1.79334	2.31179	2.51009	1.88498	1.24327	1.60086	1.16766	1.2645	1.52004	1.24609	2.28817	2.35862	1.76221	2.28025	2.4188	1.78069
GRMZM2G108849_P04	3.38856	2.91657	3.72731	3.06378	2.54266	3.29901	2.16332	1.67914	2.30975	1.85097	1.57268	2.04446	2.72831	2.48899	3.25966	2.768	2.49967	2.9715	2.00076	1.63442	2.15312	2.03631	1.66587	2.23519
GRMZM2G118610_P01	2.06684	1.94836	1.83896	2.20889	2.15364	2.11433	2.6291	2.67577	2.55143	2.5747	2.65453	2.58874	1.9333	1.82905	1.76756	2.03875	2.00256	1.97039	2.75473	2.85484	2.54159	2.7937	2.88125	2.627
GRMZM2G122479_P01	5.69521	5.78857	5.67131	5.77665	5.94809	6.2169	6.60389	5.12314	5.2567	6.50781	5.9704	5.35413	5.25405	5.84936	5.98307	5.47844	5.98713	5.19825	5.94948	5.13653	5.30109	5.73447	5.19677	5.01855
GRMZM2G132504_P04	0.362584	0.268849	0.121594	0.338601	0.224398	0.133149	0.402064	0.255253	0.120265	0.384206	0.227752	0.12858	0.375719	0.257988	0.123125	0.317017	0.239077	0.133908	0.417782	0.257472	0.125467	0.402027	0.26921	0.113912
GRMZM2G136895_P01	1.98084	2.06008	2.4329	1.87075	1.89193	2.21721	1.99632	2.21003	2.60306	1.85508	2.17671	2.33424	1.80424	1.99848	2.25736	1.84208	2.08595	2.33668	1.75282	2.26155	2.31881	1.89789	2.31526	2.49974
GRMZM2G145895_P01	2.47649	1.90634	2.73005	2.60938	1.9884	2.96376	3.27849	2.43562	3.4221	2.9437	2.43271	3.15558	2.68713	2.12548	3.09422	2.79841	2.33821	3.12837	3.20925	2.47373	3.32579	2.99715	2.29951	3.18013
GRMZM2G150262_P01	1.17953	0.656665	0.475256	1.14893	0.633035	0.478908	1.10413	0.662491	0.562007	1.21902	0.597099	0.53933	1.04928	0.578967	0.453289	1.14974	0.604888	0.518022	1.00725	0.609667	0.45339	1.14212	0.657188	0.519798
GRMZM2G169087_P01	2.82911	2.42627	1.84848	2.99195	2.64712	2.05287	2.50791	2.18053	1.78408	2.63011	2.24824	1.73507	2.89105	2.49111	2.00424	2.89077	2.52772	2.00006	2.68757	2.18627	1.80194	2.57153	2.29275	1.77325
GRMZM2G179301_P02	2.5331	2.48065	2.57394	2.80884	2.79711	2.84238	2.17919	2.11798	2.21366	2.55933	2.58075	2.4271	2.15271	2.29534	2.2134	2.33978	2.42547	2.28733	2.2169	2.17804	2.19473	2.21016	2.12466	2.24746
GRMZM2G180983_P02	2.21148	1.67319	1.77652	1.99053	1.48958	1.59917	2.7972	2.19084	2.2874	2.61143	1.96086	2.11287	2.39815	1.75207	1.85699	2.21125	1.67986	1.71317	2.90925	2.10412	2.25687	2.8707	2.14948	2.39699
GRMZM2G320099_P01	1.39636	1.7876	1.60676	1.40395	1.86721	1.66329	2.62195	3.32281	2.91783	2.44553	3.26685	2.91055	1.50023	1.87136	1.77668	1.51554	2.04358	1.9094	2.50953	3.42355	3.06559	2.60692	3.41705	3.14989
GRMZM2G323504_P01	2.77069	2.59396	2.43551	2.77917	2.45306	2.4255	2.2935	2.30649	2.09068	2.46633	2.42519	2.30657	2.62849	2.53822	2.37519	2.56751	2.41564	2.34491	2.19506	2.07398	1.95564	2.29925	2.19346	2.06602
GRMZM2G326472_P03	1.40935	1.57482	1.30566	1.39185	1.5814	1.45189	1.33697	1.43324	1.43349	1.36156	1.50831	1.43433	1.29445	1.46627	1.31282	1.35086	1.4704	1.28712	1.39713	1.48247	1.36733	1.45784	1.48309	1.40736
GRMZM2G327564_P01	1.61183	2.24893	1.97026	1.76005	2.41062	2.05071	1.98389	2.20662	1.82775	2.11306	2.20813	2.00876	1.82849	2.24871	2.1802	1.65639	2.19503	2.12369	2.15546	2.23196	1.92582	1.89083	2.25	1.9128
GRMZM2G329306_P01	1.12041	1.81868	1.76112	1.18197	1.90477	1.74821	1.22395	1.94238	1.90348	1.19896	2.08008	1.84633	0.985258	1.70052	1.61085	1.05165	1.79638	1.69984	1.0754	1.84025	1.65784	1.16239	1.91694	1.77231
GRMZM2G357654_P01	0.702143	0.891946	0.620318	0.644122	0.966213	0.714377	0.654534	0.886282	0.693957	0.761408	1.05546	0.773914	0.540523	0.777301	0.526897	0.569075	0.783513	0.548274	0.515835	0.783604	0.521728	0.612361	0.855679	0.600536
GRMZM2G385338_P01	0.332483	0.117845	0.35156	0.392612	0.135818	0.341839	0.364461	0.113541	0.372731	0.426029	0.140086	0.35383	0.324831	0.112934	0.385094	0.388927	0.100676	0.425029	0.386294	0.1338	0.402775	0.384363	0.1453	0.367142
GRMZM2G446050_P01	0.794977	0.881514	0.854655	0.934014	0.789959	0.819557	0.844189	0.863186	0.805085	0.924223	0.93143	0.869126	0.845722	0.898406	0.981905	0.838059	0.861919	0.848916	0.903278	0.91192	0.954209	0.915539	0.861666	0.866548
GRMZM5G866100_P01	2.14262	2.09504	1.89291	2.14113	2.14327	1.91423	2.14604	2.04637	1.7315	2.24986	2.23193	1.84783	2.02065	2.04574	1.97352	2.00996	2.17459	1.99035	2.14326	2.12952	1.76816	2.14647	2.13354	1.8815
GRMZM2G000039_P01	2.27676	2.2485	1.9974	2.63316	2.43529	2.35444	1.79046	1.78617	1.52632	2.21181	1.97119	1.72461	2.43573	2.36574	2.01727	2.50045	2.3642	2.04191	2.09199	2.01977	1.68354	2.05963	1.80914	1.6545
GRMZM2G008410_P01	2.48318	2.5931	2.37866	2.49566	2.71845	2.56508	2.51721	2.64141	2.48957	2.6095	2.84381	2.69591	2.09759	2.15879	2.1224	2.17544	2.26483	2.15634	2.21535	2.36603	2.23454	2.40606	2.41358	2.35751
GRMZM2G011373_P01	1.96521	2.10216	2.30448	1.78837	1.91653	2.05899	2.44774	2.7674	2.93967	2.06017	2.42147	2.47199	1.90472	2.08598	2.32202	1.78741	2.05618	2.11529	2.00258	2.28715	2.35155	2.0438	2.36314	2.436
GRMZM2G022130_P04	2.77062	1.92191	2.56252	2.89876	1.93651	2.50029	2.73165	2.00893	2.49517	2.77875	2.05235	2.59094	2.96774	1.97136	2.68697	2.98989	2.00329	2.67826	2.9927	2.0905	2.79887	2.86988	2.01516	2.68697
GRMZM2G027932_P01	1.71257	1.11196	1.25268	1.7657	1.25489	1.15403	1.762	1.21767	1.27943	1.7393	1.38064	1.21358	1.70198	1.12878	1.27556	1.6776	1.26754	1.32785	1.89465	1.22041	1.23537	1.7462	1.41811	1.26151
GRMZM2G029543_P01	2.87425	2.89542	2.36078	2.97696	2.98011	2.43337	3.02875	3.02548	2.6054	3.06913	2.93556	2.67218	2.86782	2.67957	2.34215	2.97842	2.68974	2.53015	3.08142	2.93391	2.58387	3.12326	2.86022	2.47208
GRMZM2G041369_P01	2.27547	1.97068	1.97715	2.33041	2.05241	2.19193	1.62228	1.56439	1.48302	1.63144	1.64972	1.548	2.15054	1.99306	2.04909	2.14335	2.05681	2.03744	1.89808	1.80041	1.79773	1.94844	1.91252	1.91564
GRMZM2G047855_P01	2.23925	1.98633	2.08175	2.45359	2.17769	2.38835	2.62602	2.17531	1.90523	2.60825	2.71283	2.22819	2.37182	2.09125	2.30817	2.45655	2.09483	2.21183	2.72032	2.3927	2.557	2.5242	2.36905	2.31948
GRMZM2G047949_P01	1.27338	1.14856	1.31089	1.39247	1.2271	1.35761	1.38903	1.25496	1.32103	1.46986	1.39952	1.41601	1.28728	1.14305	1.33399	1.24342	1.17513	1.36338	1.5099	1.30529	1.44629	1.43467	1.34638	1.45079
GRMZM2G051059_P05	1.11961	1.18989	1.30695	1.25142	1.23489	1.35537	1.35007	1.38597	1.45363	1.34938	1.27495	1.45802	1.07405	1.20047	1.24407	1.29698	1.24147	1.35873	1.25571	1.21856	1.39243	1.30278	1.2538	1.43078
GRMZM2G080380_P01	1.47382	1.30312	1.70613	1.80193	1.59548	2.07382	1.10016	0.937745	1.35007	1.48173	1.19226	1.62665	1.32522	1.22054	1.55707	1.49021	1.40602	1.81895	1.16038	1.13783	1.49143	1.16656	1.207	1.37588
GRMZM2G080499_P01	0.764297	0.770958	0.938419	0.736164	0.72455	0.810612	0.710951	0.680643	0.845149	0.715025	0.666033	0.757051	0.823947	0.820724	0.979605	0.765835	0.783849	0.88966	0.683356	0.790411	0.885874	0.800425	0.762832	0.893631
GRMZM2G095287_P01	1.80547	2.17808	2.47444	1.58832	1.95342	2.28017	2.14027	2.61781	2.77798	1.87353	2.35473	2.56984	1.70596	2.2328	2.49352	1.57979	2.13632	2.41794	2.22148	2.65845	3.03246	2.08518	2.86838	2.95366
GRMZM2G096020_P01	1.85274	2.16672	1.87542	2.00659	2.25899	1.97622	1.84749	2.00198	1.76751	1.92348	2.20124	1.97753	1.75968	2.02564	1.83514	1.75537	2.04695	1.75345	1.92479	2.05718	1.86212	1.92986	2.24131	1.95261
GRMZM2G100084_P01	1.70729	1.21866	1.91686	1.7665	1.43576	1.98863	2.33046	1.53761	2.41123	2.15623	1.80717	2.62047	2.00281	1.28022	2.21332	1.87442	1.24545	2.47381	2.62648	1.71871	2.6195	2.53582	1.75643	2.75619
GRMZM2G116126_P01	1.44966	1.40324	1.07827	1.45052	1.41444	1.04225	1.30698	1.28503	0.928501	1.33912	1.41706	0.964942	1.4141	1.33767	1.0434	1.39067	1.4095	1.04288	1.31883	1.34043	0.950829	1.33012	1.39263	0.948933
GRMZM2G120517_P02	1.38942	1.58239	1.79346	1.78716	1.81057	2.20527	1.29096	1.37102	1.73212	1.53767	1.83038	2.08393	1.52613	1.67091	2.06361	1.56493	1.72101	2.10575	1.57397	1.58615	2.14733	1.32976	1.42758	1.86852
GRMZM2G123652_P01	2.11435	2.29878	2.49738	1.96496	2.31368	2.39065	2.43428	2.51554	2.65584	2.32945	2.5386	2.5841	1.95303	2.23964	2.34941	1.93441	2.2734	2.37866	2.14616	2.33719	2.55811	2.12335	2.48318	2.58585
GRMZM2G132464_P01	1.88632	2.28136	2.4185	2.05792	2.33946	2.56411	1.8569	2.12755	2.25718	1.94403	2.43448	2.42961	1.76844	2.12436	2.32432	1.85329	2.26997	2.33374	1.80963	2.15125	2.3091	1.82349	2.27156	2.36344
GRMZM2G142088_P01	1.83579	1.63546	1.68939	1.80107	1.5799	1.6442	1.44806	1.35157	1.08992	1.40019	1.39737	1.08476	1.75247	1.51928	1.66088	1.67354	1.58091	1.58248	1.5259	1.43357	1.12464	1.56299	1.50194	1.12373
GRMZM2G387890_P01	0.463035	0.274047	0.23829	0.504501	0.267468	0.245392	0.515701	0.264427	0.226058	0.537568	0.253611	0.247656	0.473558	0.241174	0.248233	0.475924	0.209573	0.256347	0.497067	0.249847	0.289212	0.532645	0.239853	0.248811
GRMZM2G428518_P01	2.07705	2.37492	1.78531	1.91299	2.26927	1.72758	1.97614	2.30652	1.78603	1.98439	2.1758	1.75572	1.96561	2.28871	1.73012	2.05043	2.31448	1.78041	1.97511	2.10857	1.71052	2.05827	2.16174	1.72431
GRMZM2G436986_P01	2.43862	2.20329	2.00464	2.76372	2.7044	2.47701	2.41974	2.14238	1.96332	3.34052	3.23982	2.98845	2.55724	2.48532	2.26895	2.74181	2.78144	2.29862	3.28202	3.06438	2.84913	2.45633	2.37896	2.14989
GRMZM2G459854_P01	2.09426	2.46052	2.65956	1.95124	2.25131	2.60483	1.61275	1.87111	2.09735	1.54659	1.94632	2.09404	2.0047	2.38066	2.68554	1.90142	2.40981	2.6333	1.51169	1.8013	2.14296	1.37735	1.87895	2.08243
GRMZM5G825437_P04	2.14386	2.20251	2.59159	2.24929	2.29081	2.53051	2.32869	2.23033	2.72369	2.25126	2.34537	2.65675	2.1922	2.15386	2.60916	2.21976	2.14598	2.59567	2.36478	2.25488	2.54807	2.25016	2.37626	2.74456
GRMZM2G013811_P01	1.78929	2.09946	2.0565	2.00103	2.35728	2.20644	1.876	2.21211	2.06538	2.05968	2.53175	2.3818	2.02028	2.275	2.25245	2.03234	2.50806	2.30915	2.2135	2.60046	2.45202	2.00787	2.41587	2.27626
GRMZM2G017229_P01	2.02726	2.15175	1.77445	1.85957	1.91061	1.59003	2.52739	2.63696	2.4074	2.21641	1.93855	1.94466	2.17202	2.26644	1.9484	2.07544	2.07214	1.80999	2.68309	2.71909	2.26955	2.43881	2.30446	2.25552
GRMZM2G032936_P01	2.40104	2.04375	1.97273	2.1555	1.96923	1.90653	2.39008	1.97912	1.97354	2.23942	1.88885	1.91759	2.52906	2.08757	2.10495	2.21796	2.04718	1.9182	2.56553	1.96176	2.06389	2.50141	2.02254	2.14258
GRMZM2G039757_P01	2.46713	2.67824	2.56305	2.5277	2.62569	2.62434	2.12926	2.18348	2.09121	1.93016	1.98917	1.91052	2.09872	2.25398	2.34633	2.13099	2.33514	2.48836	2.30328	2.35777	2.4589	2.41276	2.57653	2.51729
GRMZM2G044629_P01	1.84882	0.870442	1.08362	2.17709	1.23429	1.54244	2.00241	1.04804	1.29643	2.47718	1.49149	1.75595	1.60746	0.903485	1.11764	1.84882	1.06051	1.29514	2.04241	1.16307	1.4419	1.99582	1.22868	1.46689
GRMZM2G049588_P01	1.47537	1.13732	0.774757	1.42537	0.974298	0.783232	1.59265	1.21234	0.94258	1.48118	1.10758	0.873773	1.42872	1.11287	0.810503	1.44049	1.07454	0.93335	1.63886	1.1946	0.918414	1.51737	1.18645	0.963391
GRMZM2G050072_P01	2.89444	3.23025	3.5523	2.66311	2.99758	3.46397	2.28125	2.62069	2.8554	2.27275	2.7636	3.03728	2.69231	3.0397	3.35026	2.6719	2.97813	3.22055	2.18543	2.63203	2.69752	2.3388	2.738	2.82272
GRMZM2G051771_P01	2.07199	2.58653	3.46747	1.99341	2.52695	3.12211	2.40989	3.15096	3.81385	2.33351	3.25947	4.02987	1.93303	2.674	3.40822	1.91084	2.69559	3.33678	2.11858	2.84374	3.71633	2.22874	3.26275	4.10537
GRMZM2G086269_P01	0.58144	0.867118	0.474885	0.630508	0.889354	0.533032	0.575961	0.816875	0.4535	0.583583	0.828162	0.495645	0.699883	0.918973	0.522316	0.692737	0.948593	0.573062	0.65933	0.861941	0.492137	0.576557	0.868985	0.455422
GRMZM2G088627_P01	1.85526	1.81182	1.87634	2.21047	2.06898	2.43016	2.32794	2.18978	2.47939	2.37418	2.21933	2.57218	1.83401	1.77294	1.98613	2.18716	2.00123	2.37566	2.09766	2.03268	2.1598	2.11332	1.90324	2.12034
GRMZM2G103897_P01	1.61093	1.44922	1.58867	1.64592	1.47459	1.67456	1.19066	1.09422	1.20216	1.17118	1.05809	1.1611	1.48298	1.36907	1.43025	1.60206	1.44191	1.61745	1.1441	1.02024	1.17541	1.15218	1.09265	1.1504
GRMZM2G113156_P03	0.484818	0.380973	0.505613	0.502474	0.37808	0.515339	0.489493	0.372709	0.515843	0.522667	0.416546	0.541091	0.423843	0.310202	0.421201	0.530028	0.338037	0.523604	0.502872	0.39551	0.480919	0.543804	0.407944	0.49639
GRMZM2G118597_P02	2.21027	1.98829	1.9718	1.92711	1.76999	1.72273	2.12095	2.06782	1.70497	1.98622	1.94012	1.67681	2.34717	2.11927	2.18119	2.13834	2.02806	1.95158	2.15746	2.03872	1.90717	2.11248	2.04773	1.88374
GRMZM2G121034_P01	2.76137	1.84424	2.11407	2.79361	1.8898	2.14256	2.93563	1.97596	2.12769	3.02289	2.01766	2.2251	3.116	2.06414	2.4042	2.92451	2.03768	2.21756	3.21855	2.10823	2.47312	3.22744	2.0623	2.29569
GRMZM2G132929_P04	3.39673	2.39581	2.37981	3.36842	3.00923	2.87501	3.16568	2.43002	2.77933	3.36598	3.85954	2.89363	3.16902	2.2653	2.55755	3.35777	2.39441	2.87973	2.76323	3.07648	3.00452	3.41317	2.5692	2.63043
GRMZM2G140915_P01	1.49552	1.21575	1.10478	1.57424	1.22554	1.1116	1.90272	1.41298	1.28179	1.93635	1.56537	1.39734	1.61719	1.33406	1.16309	1.63186	1.27098	1.17989	1.97533	1.50434	1.40796	1.8668	1.47099	1.35355
GRMZM2G154595_P01	6.48562	5.37281	5.43651	7.17112	5.47683	5.33575	7.76005	6.40932	6.63633	7.24339	5.61586	5.74259	7.44465	5.72354	6.69461	7.38792	5.58973	5.95827	7.61619	6.04186	5.7061	7.89107	5.77006	6.48983
GRMZM2G167932_P01	2.20458	1.89729	1.65188	2.26903	1.90458	1.62065	2.36182	1.97843	1.65399	2.39564	1.89542	1.60878	2.16984	1.80139	1.59544	2.15475	1.82326	1.63496	2.14058	1.81149	1.57478	2.30377	1.88813	1.65952
GRMZM2G168510_P02	2.07315	2.5072	2.39773	2.27421	2.55839	2.58893	2.4419	2.64584	2.74926	2.62856	2.76363	2.85119	1.88169	2.26475	2.24123	2.03673	2.36808	2.30225	2.24651	2.37993	2.38409	2.41726	2.51218	2.48531
GRMZM2G180612_P06	3.08894	2.15394	2.05429	2.72311	2.04743	1.7669	2.06316	1.53603	1.32663	1.99237	1.60954	1.28986	3.08253	2.23861	2.06861	2.8299	2.14097	1.83096	2.09458	1.63958	1.32121	2.1254	1.63389	1.34153
GRMZM2G339563_P01	2.05955	2.2624	2.22396	2.01358	2.11453	2.10191	1.97212	2.20844	2.01931	1.88632	2.0321	1.87798	1.97722	2.2934	2.25244	1.77805	2.14461	1.96869	2.12063	2.48742	2.25836	2.19253	2.45711	2.29736
GRMZM2G383154_P01	2.15671	1.68229	1.58712	2.31445	1.7373	1.54264	2.15671	1.53806	1.44867	2.59659	1.89729	1.63555	2.31959	1.66803	1.65093	2.28111	1.76715	1.71154	2.81184	1.89008	1.79287	2.363	1.81981	1.63067
GRMZM2G546254_P01	2.16969	1.99929	2.28478	2.23007	1.85744	2.21238	1.88489	1.88109	1.99586	2.02993	1.86005	1.98497	2.05991	1.87968	2.32336	2.06793	1.90252	2.3279	1.73541	1.75006	1.91756	1.82218	1.86987	1.95319
GRMZM5G877388_P02	2.33253	2.68023	2.33707	2.37404	2.79298	2.56791	2.77472	2.95491	2.75616	2.45909	3.24861	2.61264	2.19784	2.72696	2.41122	2.09858	2.7612	2.12322	2.26214	2.86525	2.52102	2.50106	2.96985	2.67077
GRMZM2G006144_P01	1.66161	1.9324	2.09738	1.5277	1.8913	2.06051	1.69948	1.87359	2.12519	1.73882	1.90092	2.14589	1.61392	1.84343	2.08983	1.56753	1.85643	2.14847	1.51852	1.81195	2.16292	1.67243	1.88998	2.16982
GRMZM2G007695_P01	6.642	6.99316	7.02951	7.37286	7.75933	7.86073	10.1232	9.85446	10.216	10.9332	10.1925	11.3716	6.34316	6.82412	7.02383	7.32756	7.55044	7.74219	9.5215	9.4889	9.87454	9.7365	9.33704	9.88164
GRMZM2G014917_P01	0.683422	0.400783	0.842658	0.749326	0.36412	0.872613	0.770161	0.346129	0.803368	0.795355	0.39001	0.853265	0.722137	0.337367	0.908594	0.790109	0.380207	0.961122	0.751247	0.358589	0.865825	0.738243	0.422795	0.892555
GRMZM2G026309_P01	0.34441	0.638664	0.448203	0.410111	0.709776	0.559504	0.389563	0.694345	0.516241	0.384925	0.735651	0.633783	0.344084	0.530645	0.398985	0.369451	0.556931	0.472598	0.368183	0.591783	0.468167	0.389273	0.542204	0.502519
GRMZM2G035477_P01	0.36349	0.707472	0.566589	0.45933	0.887541	0.792091	0.332475	0.657722	0.535141	0.427522	0.942146	0.776574	0.324402	0.610998	0.527412	0.374771	0.731678	0.632021	0.382672	0.73977	0.606179	0.335338	0.722671	0.563993
GRMZM2G037177_P01	3.18785	2.52025	2.46087	3.20666	2.56333	2.60713	3.38159	2.77696	2.75414	3.27563	2.47918	2.65822	2.95932	2.52476	2.37547	2.95619	2.36047	2.32413	2.87468	2.38	2.2813	3.15807	2.39503	2.53876
GRMZM2G047434_P01	2.09551	1.81703	2.17484	2.30376	2.10412	2.4484	2.12608	1.82179	2.23845	2.45767	2.14745	2.65176	1.88457	1.5934	2.00604	1.98828	1.84922	2.13105	2.10646	1.77096	2.10244	2.03766	1.89603	2.24703
GRMZM2G054765_P01	0.190048	0.307774	0.201162	0.225524	0.331331	0.222183	0.246389	0.371254	0.240923	0.336142	0.493311	0.311202	0.189591	0.323479	0.206834	0.193681	0.317161	0.211672	0.304378	0.41566	0.276003	0.314245	0.44003	0.330022
GRMZM2G062357_P01	1.50253	2.61995	2.34418	1.59684	3.01979	2.46862	1.29966	2.35197	1.97877	1.41691	2.61139	2.10181	1.29053	2.19604	2.06522	1.31525	2.40679	2.11719	1.33335	2.33324	1.99857	1.24493	2.46082	1.92563
GRMZM2G073743_P03	3.6208	2.05207	2.11116	2.8128	1.67555	1.68644	2.53582	1.48463	1.56684	2.17786	1.31901	1.38511	3.37249	1.95746	1.87112	2.92746	1.72317	1.58564	2.25418	1.38428	1.42569	2.29861	1.40384	1.368
GRMZM2G080176_P01	0.353138	0.339504	0.353628	0.4257	0.365014	0.371527	0.338011	0.382965	0.393612	0.426218	0.45974	0.395721	0.342777	0.328831	0.35514	0.359389	0.33555	0.35085	0.378765	0.38594	0.392662	0.376002	0.402457	0.38686
GRMZM2G083546_P01	1.58843	1.94769	1.68715	1.6815	2.02904	2.02654	1.81125	1.72563	1.52674	2.24727	2.08193	1.77512	1.55941	1.86354	1.51874	1.42445	1.81082	1.67388	1.80896	1.70364	1.38344	1.87873	1.83771	1.40839
GRMZM2G102927_P01	2.28164	2.18836	2.1797	2.25823	1.99847	1.94395	1.50108	1.48835	1.45909	1.52287	1.46324	1.43132	2.57931	2.33429	2.43397	2.29254	2.24963	2.22621	1.84279	1.66265	1.68537	1.72155	1.61501	1.64038
GRMZM2G105791_P01	2.21187	2.43974	2.40118	1.755	2.11205	1.86411	2.34051	2.6111	2.67598	1.9004	2.01098	2.11802	2.1161	2.44314	2.34317	1.90323	2.24778	2.09418	2.42954	2.55972	2.73448	2.34334	2.57547	2.76889
GRMZM2G124353_P01	2.02356	2.29653	1.89585	2.25144	2.62546	2.193	1.78198	1.96966	1.62997	2.00905	2.26448	1.82043	1.67816	1.92137	1.58771	1.85372	2.12531	1.81095	1.61398	1.77968	1.48329	1.78811	2.0175	1.5788
GRMZM2G131332_P01	1.53026	1.84751	1.11248	1.64135	1.96238	1.29452	1.46575	1.6631	1.02897	1.65821	1.89772	1.20539	1.39803	1.71349	1.11134	1.50084	1.75142	1.20127	1.38868	1.51771	1.0245	1.41688	1.64667	1.02152
GRMZM2G139407_P02	1.70876	1.44557	1.97193	1.50213	1.38286	1.87338	1.73998	1.50886	2.04364	1.62338	1.39571	2.04325	1.59837	1.31971	1.73722	1.46349	1.23986	1.63848	1.62511	1.3	1.84654	1.73877	1.40743	1.84556
GRMZM2G141818_P03	2.03669	1.06694	1.36644	2.14257	1.09017	1.33736	1.84127	0.953949	1.19183	1.95723	1.03574	1.24657	1.78682	0.987867	1.23346	1.80033	1.01175	1.26459	1.68699	0.897456	1.1794	1.7481	0.956131	1.18036
GRMZM2G150485_P06	2.39526	2.50989	1.80532	2.36685	2.68089	1.89579	2.60603	2.73857	2.05918	2.358	2.76293	1.93801	2.28324	2.55732	1.78047	2.21407	2.45349	1.75269	2.34612	2.65858	1.84224	2.43043	2.63833	1.92631
GRMZM2G162663_P02	3.07946	3.62667	3.12828	3.29192	3.82567	3.36034	3.04777	3.47417	2.83656	3.25526	3.79142	3.21511	2.84432	3.37179	2.97899	2.99714	3.40424	3.00429	3.15991	3.63207	3.17731	3.32422	3.87397	3.29912
GRMZM2G165944_P01	0.657522	0.590197	0.625772	0.902344	0.732173	0.768871	0.522188	0.5318	0.577511	0.755036	0.800013	0.725661	0.489525	0.476359	0.559678	0.551176	0.625402	0.591976	0.555147	0.598869	0.574954	0.567062	0.645188	0.575578
GRMZM2G170812_P01	2.39896	2.45035	2.27151	2.03741	2.11258	1.99231	2.51403	2.41111	2.31701	2.11813	2.14195	2.05091	2.52509	2.6119	2.47672	2.26756	2.37139	2.15639	2.56472	2.40341	2.29748	2.57409	2.4973	2.43766
GRMZM2G302259_P02	1.54471	1.40081	1.40108	1.31256	1.38232	1.44032	1.92117	1.65729	1.91834	1.60387	1.55752	1.62652	1.22352	1.17186	1.25114	1.17201	1.08765	1.17505	1.61484	1.38697	1.56654	1.60733	1.35558	1.621
GRMZM2G359070_P01	1.40861	1.66632	1.50581	1.67989	2.06888	1.93269	1.1311	1.27494	1.21965	1.38342	1.55926	1.53341	1.45941	1.78011	1.51953	1.51078	1.92269	1.62961	1.23497	1.3912	1.37821	1.19181	1.33661	1.28109
GRMZM2G458824_P01	2.75953	2.49292	2.04935	2.66777	2.18972	2.03462	2.30995	2.14658	1.98618	2.22108	1.95411	1.89229	2.87074	2.58951	2.18463	2.66593	2.30908	2.02267	2.21793	2.10607	1.94457	2.28707	2.21201	1.88568
GRMZM2G469795_P01	1.0794	0.614597	0.388144	1.12189	0.623042	0.362458	1.13433	0.622613	0.359789	1.19983	0.610435	0.353414	1.0139	0.60964	0.380212	1.1176	0.640054	0.376617	1.16736	0.628305	0.409197	1.1657	0.651315	0.370168
GRMZM5G831993_P01	1.88594	1.91935	1.63527	1.77294	1.86107	1.58751	1.97687	1.94334	1.71972	1.93882	1.94353	1.66121	1.75829	1.83003	1.62172	1.76248	1.71901	1.56173	1.92132	1.85403	1.60073	1.98334	1.92963	1.61213
GRMZM5G837869_P01	2.74982	2.40551	2.34321	2.45063	2.43559	2.12162	1.50359	1.466	1.40865	1.55963	1.47889	1.43609	2.4801	2.3039	2.129	2.41379	2.24147	2.03192	1.43148	1.37172	1.259	1.41096	1.29691	1.27053
GRMZM5G856881_P01	2.6253	1.99665	2.26838	2.51706	1.97199	2.1677	2.32064	1.58568	1.68282	2.05667	1.37706	1.44092	2.47555	1.90993	2.12106	2.459	2.01828	2.08445	2.29351	1.56728	1.56579	2.25227	1.57314	1.66887
GRMZM5G863152_P02	2.30038	2.57781	2.58515	2.59151	2.87594	2.88461	1.87768	2.13217	2.04315	2.17901	2.49234	2.41671	2.26679	2.47792	2.60131	2.55399	2.78943	2.89846	2.17924	2.40249	2.35338	2.05139	2.25189	2.21724
AC205703.4_FGP010	0.580199	0.784168	0.491322	0.629201	0.824664	0.488288	0.668793	0.769561	0.488973	0.711746	0.757195	0.502379	0.559364	0.738321	0.494991	0.567979	0.66984	0.506146	0.628284	0.705057	0.49548	0.654435	0.751193	0.53242
GRMZM2G008728_P02	2.76539	3.36328	2.95002	2.82789	3.22463	2.93939	2.14045	2.54484	2.22011	2.21801	2.63806	2.28271	3.0522	3.58338	3.11182	2.69816	3.44035	2.92551	2.11394	2.5785	2.29925	2.18397	2.62696	2.2712
GRMZM2G009661_P01	1.45746	1.64439	1.57591	1.64546	1.59957	1.55165	1.67664	1.91851	1.64291	1.65489	1.83712	1.57515	1.55344	1.62595	1.64413	1.66067	1.68582	1.60766	1.76562	1.97207	1.7064	1.58583	1.71656	1.69618
GRMZM2G010362_P01	1.79551	1.56512	1.66712	1.89095	1.65489	1.7966	1.95786	1.562	1.87705	2.07139	1.59291	2.01045	2.01527	1.60213	1.80206	1.97596	1.64687	1.9177	2.16664	1.68432	2.01011	2.12642	1.69176	1.9189
GRMZM2G021256_P01	2.44512	1.80985	1.92793	2.56631	2.25399	2.2795	2.07575	1.29769	1.79409	2.19477	1.32466	1.76038	2.65907	2.12599	2.25696	2.72509	2.16121	2.25304	2.25164	1.59836	1.84151	2.08225	1.42826	1.88658
GRMZM2G041876_P01	0.708295	1.11707	0.886552	0.685499	1.17226	0.985668	0.747625	1.12998	1.02205	0.877225	1.33343	1.14695	0.64448	1.00973	0.8893	0.661296	0.924041	0.900576	0.780061	1.11051	1.07237	0.895518	1.20297	1.09653
GRMZM2G055320_P01	1.76154	1.91819	2.0202	1.81654	2.16968	2.30764	1.35167	1.5368	1.65003	1.49827	1.78015	2.00014	1.3851	1.71394	1.83367	1.65423	1.83959	1.95175	1.26892	1.5035	1.64135	1.26374	1.53815	1.59523
GRMZM2G061990_P01	12.7363	12.3773	12.2983	12.1193	12.6268	13.0951	13.0874	13.5577	13.4507	12.8423	12.9681	13.7256	12.1692	12.0707	12.8559	11.5791	11.7195	12.1602	13.0313	13.132	13.6463	12.4351	13.5478	13.7678
GRMZM2G069092_P01	1.8527	1.22421	1.59371	1.77381	1.18434	1.52773	2.36809	1.79712	2.1536	2.19562	1.61627	2.04658	1.76664	1.10077	1.46642	1.68151	1.07571	1.40381	2.08419	1.43185	1.86537	2.27744	1.56974	1.94278
GRMZM2G083418_P01	1.97314	2.51068	2.30337	1.84254	2.38405	2.11136	1.84292	2.41667	2.29919	1.68532	2.38996	1.99876	1.62277	2.32292	2.20818	1.70414	2.35606	2.03126	1.59064	2.31522	1.94164	1.73855	2.30443	2.10625
GRMZM2G085967_P03	2.98404	1.83702	2.72585	2.46309	1.60677	2.3626	2.06898	1.40321	1.94981	1.94302	1.3289	1.73903	2.45207	1.58373	2.45649	2.54842	1.74658	2.50029	1.75786	1.22174	1.52744	1.78253	1.27205	1.73849
GRMZM2G086371_P01	1.48224	1.38931	0.985567	1.50841	1.3773	1.07237	1.48224	1.30867	0.952175	1.63374	1.48742	1.07498	1.46474	1.29721	0.899673	1.39086	1.31959	0.993412	1.51469	1.36134	1.01504	1.52307	1.45917	1.00679
GRMZM2G090980_P05	2.28093	1.48265	1.69521	2.34964	1.55304	1.75585	2.67204	1.72117	2.00047	2.74527	1.75853	1.96459	2.23316	1.51822	1.74202	2.04549	1.32902	1.60348	2.77072	1.76974	2.05872	2.90275	1.86763	2.17966
GRMZM2G095763_P01	1.25918	1.45258	1.22166	1.29259	1.42359	1.33641	1.27454	1.40347	1.28129	1.29361	1.45078	1.40831	1.21695	1.3097	1.17155	1.20786	1.23437	1.16792	1.20133	1.33522	1.20525	1.25394	1.39029	1.20763
GRMZM2G103342_P01	2.58935	2.53525	2.71983	2.60631	2.55327	2.93887	2.60783	2.5284	2.86335	2.30004	2.49743	2.62648	1.89759	1.84737	2.08864	1.82849	1.87123	2.08112	2.86828	2.8835	3.05619	3.30212	3.28354	3.62552
GRMZM2G111269_P01	2.39294	1.98742	2.39994	2.09991	1.83082	2.24856	2.11492	1.86466	2.32202	2.031	1.67539	2.19422	2.43091	2.01313	2.5126	2.3055	1.88128	2.41284	2.26869	1.82522	2.43344	2.35613	1.92208	2.47637
GRMZM2G112524_P02	3.8781	3.1445	3.00951	4.92936	4.25703	4.26317	1.88813	1.64285	1.70373	1.89192	1.89734	1.8317	2.00309	1.93674	2.04321	2.82166	2.80595	2.66736	1.71585	1.59261	1.66898	1.8719	1.72297	1.81232
GRMZM2G122139_P01	1.95551	2.19586	1.57407	1.7957	2.09651	1.50651	1.56586	1.98368	1.41065	1.57368	1.97682	1.30481	1.93558	2.29293	1.74393	1.82755	2.21413	1.53386	1.72474	2.11843	1.4774	1.62137	2.12163	1.44877
GRMZM2G128056_P01	2.14585	2.7215	2.84257	1.83049	2.53182	2.72621	2.01913	2.526	2.67119	1.83995	2.45029	2.64642	1.84386	2.50243	2.59746	1.85579	2.5809	2.60264	1.75705	2.33216	2.45575	1.70788	2.3549	2.45776
GRMZM2G129218_P01	1.60654	1.90911	1.75042	1.72905	2.11942	1.92254	1.79318	1.94733	1.64121	1.91502	2.09291	1.8494	1.6786	1.96845	1.80461	1.6948	2.00859	1.73549	1.87486	2.01762	1.67275	1.70796	1.93657	1.62359
GRMZM2G130034_P01	1.98426	2.10617	1.66042	2.02259	2.11635	1.65731	2.58588	2.5066	2.05345	2.43114	2.39424	1.85915	2.27008	2.37139	1.93664	2.25479	2.28312	1.7289	2.74795	2.75354	2.12161	2.70331	2.46859	1.98251
GRMZM2G134982_P01	1.8102	1.76089	1.20657	1.89347	1.70025	1.23739	1.87813	1.6109	1.17391	1.89383	1.87301	1.28821	1.83996	1.71571	1.23076	1.87155	1.77618	1.27557	1.89474	1.74017	1.2806	1.91812	1.8229	1.307
GRMZM2G147430_P02	1.16958	1.08349	1.45164	1.02404	1.11901	1.35437	0.862268	0.887667	1.06455	0.936232	0.96902	1.12252	1.07259	1.05702	1.40654	1.06726	1.07936	1.32369	0.947803	0.875177	1.14301	0.920237	0.92926	1.13368
GRMZM2G150952_P01	0.957483	0.738193	0.621566	0.979575	0.743407	0.615208	0.916063	0.653975	0.506851	0.844369	0.568309	0.46888	0.819312	0.56744	0.445342	0.862267	0.616899	0.486978	0.801721	0.540719	0.434288	0.81921	0.57106	0.420887
GRMZM2G151967_P01	0.701811	1.38029	1.1844	0.678528	1.40266	1.11651	0.781891	1.60853	1.38364	0.799389	1.60363	1.32413	0.700894	1.36171	1.16297	0.742239	1.44682	1.15936	0.789652	1.56198	1.30562	0.805597	1.63438	1.36338
GRMZM2G155111_P01	0.770538	1.06933	0.695925	1.07214	1.3667	0.869959	0.891022	1.06497	0.594796	1.11154	1.39613	0.764208	0.650531	0.859075	0.757065	0.731619	1.07453	0.846638	0.96886	0.957031	0.745999	0.80375	1.21222	0.725409
GRMZM2G172491_P01	1.30644	1.3277	1.04152	1.50218	1.49662	1.18778	1.48717	1.44252	1.15855	1.39792	1.4827	1.2016	1.30227	1.32627	1.07511	1.16643	1.16671	0.954563	1.63306	1.52367	1.36094	1.20453	1.23381	1.01994
GRMZM2G177169_P01	1.81549	1.83388	1.62203	2.1308	1.96566	1.92086	1.74326	1.5646	1.51515	2.09993	1.84567	1.83806	1.80296	1.79567	1.54476	1.89596	1.8471	1.71703	1.76441	1.56264	1.35622	1.74719	1.58478	1.48587
GRMZM2G181336_P03	4.72473	3.06869	3.60128	5.14212	3.08694	3.94713	4.71365	2.87514	3.84579	5.55536	3.63259	4.52468	3.84424	2.84523	3.43627	4.35305	2.84433	3.47319	3.96336	2.73334	3.47997	4.70349	2.91373	3.6917
GRMZM2G382104_P02	1.84879	1.38519	1.49612	1.98787	1.46721	1.61493	1.85885	1.36536	1.37448	1.96386	1.40802	1.54701	1.77227	1.31738	1.51149	1.8352	1.36181	1.52015	1.8164	1.30179	1.41269	1.91675	1.39325	1.52313
GRMZM2G423202_P01	1.21854	1.45003	1.16705	1.17432	1.25254	1.05054	1.02861	1.0603	0.807124	1.08841	1.10942	0.769528	1.2696	1.47133	1.30016	1.14112	1.29655	1.09344	1.04749	1.18325	0.903541	1.0319	1.17658	0.908621
GRMZM2G443985_P02	2.07532	2.14476	1.67247	1.49917	1.80407	1.55149	2.07276	2.31095	1.62098	1.56516	1.88604	1.57168	2.04794	2.29613	1.77225	1.89667	2.2602	1.63815	1.87145	2.06683	1.56579	1.97152	2.231	1.60719
GRMZM2G446872_P01	0.127711	0.241776	0.459799	0.131629	0.251242	0.528418	0.12583	0.234146	0.469445	0.124332	0.275074	0.496616	0.124775	0.239515	0.505497	0.114567	0.256164	0.531761	0.124991	0.234264	0.50545	0.126165	0.267821	0.503014
GRMZM2G451366_P01	1.82704	1.53724	1.65909	1.85177	1.79216	1.74898	1.96301	1.78789	1.75192	2.08331	2.12648	1.98324	1.71456	1.41535	1.51961	1.69214	1.71703	1.58764	1.90178	1.74196	1.83218	1.96639	1.88189	1.91734
GRMZM2G003875_P01	1.76219	1.46377	1.52104	1.71205	1.49294	1.66052	1.84334	1.54866	1.7364	1.7789	1.51453	1.72428	1.66898	1.43781	1.51758	1.64124	1.42819	1.58889	1.78218	1.52547	1.59944	1.81112	1.58862	1.65186
GRMZM2G015073_P01	0.583478	0.760479	0.853983	0.623553	0.69269	0.873144	0.636211	0.791099	0.864945	0.63999	0.817155	0.87185	0.582878	0.712342	0.838878	0.604535	0.680913	0.880136	0.626732	0.74885	0.899383	0.702622	0.796472	0.917682
GRMZM2G022997_P01	1.22048	1.6036	1.39101	1.2216	1.57697	1.33337	1.18175	1.52162	1.34863	1.21537	1.56205	1.23444	1.33507	1.7626	1.50411	1.26594	1.6681	1.4556	1.30742	1.66986	1.41704	1.25237	1.63521	1.31579
GRMZM2G028516_P02	1.61175	1.78427	1.37051	1.31014	1.49567	1.1133	1.502	1.58617	1.1599	1.37001	1.37628	1.12013	1.76125	2.0646	1.51797	1.37361	1.38561	1.07899	1.56367	1.66682	1.35124	1.50756	1.64058	1.28796
GRMZM2G029048_P01	3.5876	4.35409	4.19683	3.71578	4.53097	4.33474	2.2882	2.85066	2.39006	2.53506	3.74753	2.71437	2.3611	3.27122	2.91	2.17019	3.29285	2.7721	2.27158	2.95784	2.32512	2.0705	2.99485	2.35678
GRMZM2G031360_P01	2.17807	1.69983	1.45578	2.1987	1.55316	1.49384	1.96699	1.50405	1.37256	2.04061	1.46755	1.36834	1.97068	1.47164	1.3709	1.95679	1.51715	1.33466	1.81412	1.32169	1.26835	1.87405	1.46493	1.33556
GRMZM2G059015_P01	1.6439	1.8456	1.7841	1.66937	1.85008	1.80381	1.6085	1.72718	1.82885	1.57939	1.79221	1.74503	1.65614	1.71464	1.81287	1.63629	1.66358	1.73419	1.4851	1.62256	1.61609	1.72131	1.78415	1.67506
GRMZM2G064993_P01	2.52573	2.736	1.85859	3.12028	3.2817	2.44938	2.25109	2.37584	1.51725	2.84154	3.01152	2.13262	2.25927	2.38065	1.71241	2.53494	2.52535	1.96128	2.34417	2.40334	1.7769	2.12298	2.2856	1.59157
GRMZM2G066111_P01	2.40119	1.61023	1.7462	2.2773	1.63881	1.75256	2.36362	1.60605	1.64945	2.44898	1.79392	1.83074	2.32248	1.48321	1.65547	2.26993	1.45768	1.71259	2.42045	1.62163	1.80279	2.49606	1.78846	1.85019
GRMZM2G083689_P01	1.74352	1.32748	1.25754	1.99114	1.63082	1.64902	1.78678	1.28663	1.25779	2.10984	1.54478	1.60474	1.72804	1.23183	1.21186	1.93134	1.4207	1.34736	1.88491	1.28919	1.33069	1.82442	1.26858	1.341
GRMZM2G097207_P01	1.91364	1.49371	1.51099	1.8746	1.37627	1.58145	2.36736	1.82725	1.90699	2.22805	1.73472	1.82513	1.88111	1.45481	1.60805	1.9655	1.45874	1.53395	2.29637	1.81385	1.96241	2.47338	1.84066	2.07102
GRMZM2G099328_P03	1.22264	1.59226	1.62519	1.15073	1.51596	1.6369	1.30364	1.73054	1.91102	1.22121	1.74129	1.78224	1.26565	1.5172	1.6757	1.22157	1.47578	1.57769	1.31415	1.72867	1.91972	1.30041	1.69831	1.87155
GRMZM2G103896_P01	1.28191	1.39937	1.44332	1.11733	1.26312	1.46065	1.09454	1.22758	1.33452	1.05327	1.14754	1.35306	1.16562	1.30541	1.43548	1.11425	1.24535	1.3743	1.09393	1.16242	1.26159	1.07914	1.24921	1.33708
GRMZM2G110145_P01	1.09941	0.583042	0.111419	1.34137	0.713272	0.116905	1.14451	0.629972	0.109244	1.45859	0.873008	0.120097	0.969993	0.467067	0.102622	0.978708	0.522385	0.122535	0.999952	0.604747	0.187316	1.00747	0.606507	0.129862
GRMZM2G110881_P01	2.36343	2.52587	2.66037	2.5365	2.57031	2.96352	2.08826	1.9632	2.20781	2.14174	2.15542	2.33349	2.27859	2.33562	2.73535	2.43003	2.41908	2.66685	2.03941	1.97106	2.20997	2.12205	2.05944	2.22264
GRMZM2G119705_P01	2.9591	2.28074	2.10107	3.98013	3.31954	3.03598	1.17082	0.989462	0.945451	1.25514	1.04624	1.01485	2.58306	2.16765	1.98336	2.63618	2.12041	1.81469	1.22226	1.02646	1.04494	1.19331	1.0495	1.05965
GRMZM2G134708_P01	1.87471	2.88903	2.36284	1.8038	2.80329	2.29784	1.68121	2.42813	2.01387	1.5737	2.26547	2.00874	1.62217	2.47427	2.20326	1.52693	2.22218	1.95327	1.95789	2.87564	2.61821	1.95959	3.042	2.54196
GRMZM2G152105_P03	2.40163	1.75494	1.90071	1.93361	1.41399	1.59463	2.6625	1.90325	2.24394	1.90733	1.36879	1.82227	2.43453	1.75889	1.87325	1.96439	1.43805	1.62941	2.48874	1.85375	2.09258	2.20727	1.50833	1.84321
GRMZM2G153444_P01	1.80841	2.47874	2.60704	1.61045	2.3221	2.30994	1.47543	2.19663	2.09769	1.41591	2.0673	1.98878	2.32911	3.25862	3.42768	1.99289	2.88015	2.83475	1.89867	2.55114	2.56753	1.46913	2.24532	2.16658
GRMZM2G165390_P01	2.15178	2.63887	2.58458	2.37546	2.92694	3.16181	1.83143	2.09546	2.14893	1.96749	2.38379	2.51393	2.02885	2.36678	2.42541	2.13994	2.50562	2.75575	1.71668	2.0518	2.24971	1.78837	2.03074	2.15986
GRMZM2G177923_P01	2.45441	1.50757	1.64055	2.10215	1.31655	1.51984	2.098	1.14926	1.48737	1.84934	1.00147	1.26923	2.35787	1.5022	1.68814	2.15212	1.26144	1.61745	1.98586	1.13471	1.36284	2.00024	1.12679	1.41459
GRMZM2G341058_P01	6.90651	7.32155	6.89115	6.67899	6.81955	7.31206	6.5757	6.66267	6.81435	6.18626	6.38309	7.06575	7.07889	6.93041	7.12515	6.58966	6.88369	7.03894	7.19544	6.31127	6.96287	6.78856	6.68777	6.78972
GRMZM2G395114_P01	3.28091	2.71697	2.3155	2.68138	2.38703	2.03831	2.89296	2.45811	2.09472	2.56487	2.26783	1.86953	2.84559	2.48632	2.13302	2.93617	2.61188	2.10354	2.49797	2.07728	1.78108	2.30016	1.99459	1.66431
GRMZM2G452026_P01	1.63073	2.16194	2.57897	2.07081	2.63953	2.94995	1.20751	1.57309	1.68135	1.52259	1.94926	1.90719	1.71211	2.03407	2.23377	1.79917	2.32674	2.80767	1.73759	1.5932	1.86684	1.3195	1.72216	1.97427
GRMZM2G481548_P01	1.80965	1.03138	1.08866	1.69718	0.99265	1.067	1.77734	0.992551	1.20878	1.79251	1.07141	1.1667	1.72075	0.921775	1.09671	1.78983	0.994946	1.12212	1.66915	1.00363	1.09978	1.7436	0.991652	1.15025
GRMZM5G866734_P01	1.5233	1.75434	1.7614	1.55739	1.82747	1.65698	1.60906	1.89621	1.79993	1.58143	2.07336	1.77722	1.30762	1.72161	1.6876	1.38737	1.78085	1.67556	1.51909	1.95745	1.81214	1.51474	1.98871	1.82917
GRMZM2G000177_P01	1.51262	2.13879	1.63898	1.52988	2.22305	1.75047	1.44023	2.00962	1.50407	1.5256	2.26048	1.70037	1.50346	2.05004	1.57595	1.545	2.08362	1.67778	1.49047	2.05518	1.58724	1.45275	2.17921	1.56514
GRMZM2G001668_P01	2.22477	1.50251	1.69978	2.32136	1.58492	1.8324	2.11245	1.59288	1.66476	2.11223	1.50532	1.58272	2.44232	1.66562	1.81109	2.64002	1.91536	2.05706	2.16505	1.65251	1.74444	1.98179	1.58087	1.60775
GRMZM2G019872_P02	3.19013	2.1378	2.42583	2.90253	2.13065	2.38347	2.43209	1.95399	2.23358	2.40634	2.06924	2.3173	2.73343	1.89726	2.14761	2.85075	2.10653	2.39049	2.19687	1.74182	1.99371	2.28786	1.9627	2.108
GRMZM2G020928_P03	1.52424	1.15829	1.13325	1.56122	1.0763	1.148	1.57146	1.16858	1.17036	1.63365	1.25503	1.20976	1.28693	1.01558	1.05248	1.31321	1.04222	0.993253	1.48283	1.10706	1.10283	1.62647	1.17693	1.19006
GRMZM2G022180_P02	8.83121	7.61073	7.53187	9.72684	8.42432	8.31638	9.36229	7.99655	7.95349	10.7548	9.03639	9.14982	8.62868	7.06385	7.30676	8.53056	7.25713	7.07336	9.41089	7.49012	7.59737	9.75474	8.12091	8.07094
GRMZM2G029506_P01	0.134967	0.621328	0.591956	0.16216	0.692512	0.754596	0.113873	0.58448	0.60255	0.136636	0.696844	0.750615	0.10936	0.568849	0.499614	0.117551	0.588811	0.567462	0.108902	0.588497	0.598998	0.116552	0.658678	0.634208
GRMZM2G032282_P01	2.46245	2.98502	2.95619	2.45312	3.02875	2.86746	2.32654	2.97609	2.80634	2.32391	3.04445	2.75022	2.04849	2.61054	2.62387	2.17699	2.8877	2.65737	2.08845	2.69123	2.57334	2.12004	2.77622	2.76521
GRMZM2G034069_P01	3.23497	2.60588	2.19363	3.18753	2.69452	2.41451	3.25772	2.57539	2.39309	3.38848	2.61869	2.49605	2.89109	2.34941	2.08445	2.91416	2.38221	2.08146	3.03466	2.353	2.16369	3.09139	2.4209	2.17313
GRMZM2G040079_P01	0.339578	0.118939	0.231221	0.36443	0.114345	0.234507	0.369449	0.139887	0.248887	0.404029	0.130585	0.248841	0.377389	0.110107	0.237141	0.369861	0.119398	0.256322	0.406366	0.132514	0.271587	0.368899	0.134225	0.271494
GRMZM2G052078_P02	0.430869	0.5093	0.455647	0.623075	0.540883	0.574461	0.485883	0.443812	0.488684	0.613564	0.620977	0.609851	0.449207	0.421619	0.401338	0.468273	0.462923	0.495282	0.4422	0.463729	0.474057	0.486929	0.536757	0.500681
GRMZM2G075333_P01	1.59972	1.49027	1.3566	1.98885	1.73727	1.69017	1.41217	1.30014	1.11635	1.93708	1.83462	1.62542	1.36686	1.24504	1.17553	1.40201	1.32467	1.19294	1.65665	1.51095	1.39945	1.63665	1.55704	1.44353
GRMZM2G076705_P01	1.15593	0.79847	1.33172	1.19823	0.792774	1.21157	1.08872	0.765003	1.2667	1.1369	0.763262	1.24402	1.12197	0.716107	1.25681	1.10059	0.682165	1.26499	1.10224	0.719035	1.16488	1.09542	0.763183	1.25931
GRMZM2G077036_P01	1.05907	1.42194	1.33714	1.6875	1.73312	1.46302	1.06053	1.8839	1.67943	1.39005	2.29302	1.79866	1.06665	1.29335	1.43654	1.27139	1.4793	1.45761	1.30617	1.94097	1.88323	1.15864	1.9544	1.94436
GRMZM2G080828_P01	1.18789	1.73134	1.48981	1.33367	1.75439	1.62963	1.6428	2.17856	2.0589	1.58631	2.10318	1.98293	1.2798	1.7696	1.70007	1.34476	1.74622	1.66293	1.82498	2.36432	2.28482	1.79979	2.35238	2.1909
GRMZM2G100448_P01	0.474534	0.676522	0.838971	0.570537	0.849988	0.994785	0.428966	0.672999	0.76123	0.560847	0.872785	0.962593	0.467538	0.710373	0.877136	0.519061	0.767642	0.903769	0.515941	0.741045	0.877883	0.462575	0.708646	0.783632
GRMZM2G105531_P01	1.58663	1.88122	1.15131	1.89519	2.13861	1.41019	1.63677	1.83131	1.19567	1.97902	2.14587	1.46377	1.63177	1.89706	1.09819	1.79492	2.01234	1.18771	1.71931	2.00172	1.21672	1.75639	2.09186	1.27643
GRMZM2G108457_P02	1.62548	1.48648	1.25978	1.44177	1.42368	1.25479	1.52767	1.59111	1.28808	1.53393	1.68159	1.30062	1.45779	1.37639	1.16221	1.40027	1.42642	1.20344	1.51486	1.43873	1.21676	1.49823	1.5756	1.31432
GRMZM2G117642_P02	2.24337	1.50903	1.62175	2.5927	1.74761	2.1346	2.12566	1.68804	2.02604	2.41157	1.83208	2.16244	2.03042	1.46702	1.69259	2.27794	1.56815	1.76168	2.07751	1.72825	1.85509	2.24083	1.45982	1.74582
GRMZM2G119361_P02	1.74573	1.23731	2.08486	1.75294	1.16232	2.05786	1.79289	1.44198	2.46195	1.83541	1.26901	2.24419	1.77368	1.25679	2.39312	1.65314	1.27227	2.29841	1.7003	1.07438	2.21077	1.74591	1.28594	2.24884
GRMZM2G119720_P01	2.23141	1.93589	2.19077	2.37846	1.99192	2.43521	2.24502	1.74582	2.18043	2.46459	2.09363	2.47116	2.31687	2.04437	2.36309	2.34722	1.99812	2.43274	2.57549	2.1098	2.5125	2.44094	2.08047	2.41409
GRMZM2G119941_P01	2.37729	3.7898	2.84331	2.22221	3.40149	2.58028	1.03454	1.59223	1.18942	1.05638	1.62334	1.18829	2.04185	3.18334	2.45484	2.15693	3.32165	2.47886	1.0635	1.50565	1.13687	1.0473	1.58249	1.12811
GRMZM2G120578_P01	1.49987	2.15115	2.05666	1.49459	2.2035	1.83703	1.69092	2.18908	1.87528	1.69668	2.24964	1.84465	1.60732	2.26938	1.92782	1.60284	2.35567	1.75293	1.74633	2.24188	1.8673	1.66145	2.3397	1.83833
GRMZM2G123277_P01	4.6215	5.45725	5.65006	4.85106	5.42237	5.56122	4.73123	5.77503	6.14878	4.80377	5.90149	6.16733	4.56641	5.15201	5.23118	4.62104	5.43927	5.25311	4.74868	5.78321	5.93625	5.05629	6.06937	6.05207
GRMZM2G130440_P02	1.786	1.55164	1.46372	1.79929	1.56978	1.44031	1.75959	1.47393	1.39562	1.59747	1.35978	1.26284	1.82971	1.52084	1.39378	1.72024	1.45375	1.31193	1.69401	1.47846	1.36753	1.81368	1.59183	1.36427
GRMZM2G132468_P01	1.3242	1.72849	1.94292	1.27486	1.64274	1.97632	1.22789	1.66872	1.77615	1.24547	1.62593	1.83109	1.24718	1.61982	1.92613	1.23156	1.57534	1.87436	1.21162	1.54121	1.79018	1.23721	1.59775	1.88285
GRMZM2G158228_P01	2.04799	1.93246	1.85835	1.98086	2.01158	1.85382	1.9382	1.71467	1.56791	1.86166	1.73112	1.63654	2.1145	1.99983	1.90253	2.06828	2.02431	1.90452	2.00763	1.81789	1.66062	1.98086	1.76814	1.61571
GRMZM2G159250_P01	1.747	1.35373	1.373	2.17042	1.65837	1.97615	2.26613	1.61642	1.98329	2.49142	2.05713	2.30613	2.02576	1.46448	1.86001	2.56317	2.09409	2.19311	2.48639	2.04281	2.40918	2.24971	1.71298	1.89912
GRMZM2G161969_P01	7.12062	6.63882	6.86947	6.93934	6.63611	6.72368	7.04253	6.49317	6.96482	7.16106	7.17534	6.7451	6.60398	6.53246	7.16382	6.99651	6.84272	6.97381	6.89821	6.81156	6.55302	7.23775	6.86982	7.00628
GRMZM2G171466_P01	1.70076	2.00163	2.81806	1.95406	2.21031	3.09035	2.14077	2.24688	3.41078	1.98744	2.2769	3.11857	1.72006	1.94419	2.94369	1.86626	2.08788	2.83854	1.82645	2.18905	2.93622	1.8042	2.04316	2.84379
GRMZM2G172723_P01	1.90536	2.60655	2.50995	1.43185	2.18248	1.9729	1.62452	2.18379	2.05967	1.22612	1.8622	1.67529	1.98123	2.67024	2.72999	1.75072	2.45113	2.36375	1.53827	2.11879	1.88364	1.54192	1.92484	1.80482
GRMZM2G316232_P01	1.68608	1.66621	2.12324	1.62982	1.57652	1.98388	1.63776	1.6731	2.03552	1.6114	1.6625	2.03448	1.62846	1.63608	1.92975	1.56476	1.53563	1.96148	1.62137	1.59015	1.94447	1.62035	1.65981	1.98719
GRMZM2G436328_P01	0.999625	0.674832	0.523846	1.0207	0.793749	0.555694	0.820191	0.524715	0.477891	0.88097	0.583876	0.504368	0.906818	0.681575	0.533395	0.92817	0.734258	0.577668	0.691047	0.511759	0.398676	0.752482	0.495234	0.428463
GRMZM5G849107_P02	1.99186	1.43281	1.66047	2.0571	1.44728	1.68078	1.76819	1.26384	1.53035	1.86469	1.37813	1.61022	1.92371	1.38941	1.67029	1.87672	1.44106	1.65336	1.78528	1.3356	1.59126	1.73246	1.31187	1.60328
GRMZM5G870176_P01	0.416076	0.255737	0.608027	0.388539	0.246966	0.657277	0.369378	0.246613	0.62227	0.433172	0.291	0.695702	0.347195	0.214602	0.592518	0.369684	0.232422	0.568526	0.319697	0.258485	0.634804	0.35626	0.254175	0.620877
GRMZM5G886257_P01	7.33374	6.28977	6.50157	7.89691	6.88362	7.01091	5.41146	4.96706	4.80038	6.14865	5.27294	5.29323	6.98423	6.07668	6.0233	7.33301	6.57006	6.52757	5.88138	5.1008	5.03887	6.01061	4.83907	4.80418
GRMZM2G002440_P01	1.0201	2.12454	1.68102	1.11145	2.17465	1.86803	1.2958	2.40388	2.14244	1.13075	2.39104	1.91638	0.998951	2.08209	1.75724	1.05849	2.20882	1.90364	1.17099	2.34921	1.82502	1.21348	2.26576	1.90623
GRMZM2G006672_P02	1.87301	1.99713	2.07342	1.96414	1.90312	1.85826	2.45834	2.29252	2.30624	2.22533	1.9745	2.14252	2.24065	2.16427	2.19768	2.13046	1.98069	2.00687	2.60768	2.53008	2.17766	2.50039	2.15769	2.23734
GRMZM2G011456_P02	2.22117	1.50616	1.5348	2.52864	1.65718	1.81346	2.3152	1.46712	1.56747	2.48207	1.58394	1.76344	2.06158	1.41493	1.55058	2.16974	1.55046	1.6735	2.12294	1.39417	1.5591	2.09866	1.42604	1.53764
GRMZM2G015024_P01	1.2125	1.2969	1.31005	1.37868	1.49742	1.37876	1.16103	1.28193	1.10782	1.33379	1.45492	1.26591	1.27848	1.43103	1.39429	1.23867	1.41214	1.25429	1.27066	1.28597	1.17433	1.12619	1.33968	1.11455
GRMZM2G016774_P01	2.13912	1.99882	1.89936	1.86158	1.84697	1.73537	2.02438	1.85867	1.73313	1.84043	1.72981	1.61313	2.15065	2.04621	1.88458	2.05814	1.91916	1.83122	1.96627	1.75098	1.62942	1.95943	1.84939	1.67378
GRMZM2G016827_P02	2.51133	2.30939	2.22864	2.65925	2.51639	2.35096	2.08637	1.79898	1.61314	2.28815	2.00878	1.82026	2.534	2.27376	2.23797	2.62884	2.38041	2.23667	2.13894	1.82949	1.78014	2.15312	1.88281	1.73221
GRMZM2G032160_P01	2.00808	1.40658	1.68092	1.98203	1.35709	1.66288	1.90975	1.38624	1.58631	1.89564	1.35247	1.51637	1.81572	1.36286	1.67582	1.84138	1.36604	1.6069	1.79358	1.3897	1.66527	1.75382	1.37902	1.60554
GRMZM2G039996_P02	6.735	3.29511	4.11541	7.64918	3.36052	4.40176	5.68314	2.95163	3.41962	6.81299	3.29906	3.89972	6.85368	3.49791	4.13368	7.15208	3.39076	4.22629	7.02932	3.15542	4.1479	6.08462	3.04958	3.65561
GRMZM2G045892_P02	1.48903	1.19718	1.34255	1.5207	1.27185	1.33782	1.50254	1.27725	1.34039	1.45519	1.35659	1.37488	1.48177	1.16316	1.36298	1.45693	1.17396	1.34999	1.51155	1.25686	1.44035	1.58229	1.30316	1.45104
GRMZM2G046729_P01	2.13715	1.51273	1.57318	2.58619	1.78135	1.86886	1.84597	1.43914	1.36241	2.03206	1.65708	1.54226	1.87069	1.35033	1.43416	1.99509	1.48213	1.58494	1.70889	1.33527	1.32251	1.82395	1.44196	1.31168
GRMZM2G066996_P01	2.56308	1.53245	1.77673	2.51935	1.52624	1.87016	2.88511	1.88801	2.01979	2.87492	1.89739	2.15875	2.57252	1.58651	1.83366	2.46319	1.5978	1.90197	3.05905	1.92506	2.16761	3.06278	2.04655	2.27133
GRMZM2G070252_P01	0.438658	0.765249	0.690443	0.501995	0.706508	0.722735	0.674908	0.934427	0.898857	0.813129	1.01134	1.00207	0.490447	0.763347	0.733613	0.52574	0.76229	0.77458	0.830226	1.04663	1.13343	0.724898	1.01021	1.04427
GRMZM2G072041_P01	2.03334	1.81504	1.81593	2.12694	1.98455	1.8766	2.0379	1.74549	1.75688	2.05571	1.85116	1.8701	1.91178	1.64571	1.63807	2.08428	1.83346	1.77819	1.84303	1.55327	1.59311	1.90702	1.57133	1.67112
GRMZM2G074454_P01	1.05437	1.40243	1.56381	0.983996	1.37777	1.47393	1.21115	1.54044	1.57254	1.18724	1.57251	1.62735	1.08594	1.44777	1.66732	0.989099	1.34084	1.5681	1.27716	1.62255	1.73913	1.21105	1.69569	1.78782
GRMZM2G081955_P01	2.10379	2.47186	2.6265	2.06939	2.41559	2.4823	1.86386	2.19074	2.3326	1.8454	2.37824	2.49358	2.08848	2.46389	2.6362	2.10463	2.63123	2.74238	1.97984	2.18601	2.33863	1.94461	2.26245	2.34781
GRMZM2G097282_P01	1.1411	1.15889	1.48312	1.34789	1.26092	1.64656	1.70414	1.67897	2.15425	1.89579	1.71429	2.34479	1.17522	1.01151	1.48401	1.27147	1.15289	1.59896	1.69525	1.48025	2.0173	1.76914	1.54228	2.271
GRMZM2G104504_P01	1.31064	1.60884	1.83801	1.22076	1.54063	1.77575	1.26008	1.43792	1.6989	1.19482	1.48065	1.73252	1.3309	1.54649	1.84429	1.24565	1.46562	1.7715	1.23572	1.43492	1.66823	1.20143	1.48493	1.67081
GRMZM2G110258_P01	1.81405	2.03098	2.16801	1.92032	2.07628	2.22867	1.62303	1.91897	2.08655	1.70117	2.34498	2.37344	1.7954	1.99866	2.28888	1.91879	2.31677	2.31743	1.67659	2.22803	2.34311	1.55066	2.08534	2.19391
GRMZM2G113873_P03	2.01327	2.7743	2.63709	2.03009	2.74971	2.60308	0.949607	1.61446	1.35783	1.01862	1.74356	1.42764	1.94059	2.81557	2.57964	1.92995	2.7781	2.38592	1.11896	1.79889	1.57035	0.998904	1.72541	1.43846
GRMZM2G122296_P01	2.64589	2.56277	3.18297	2.26238	2.39371	2.84034	1.55789	1.64508	1.91651	1.46263	1.75751	1.91339	2.22447	2.32565	2.91323	2.06866	2.34907	2.70641	1.39002	1.47793	1.75984	1.38805	1.48828	1.76731
GRMZM2G124321_P01	1.51048	1.60866	1.84041	1.42295	1.62408	1.84467	1.84707	1.88175	2.06441	1.8943	1.89946	2.11703	1.67662	1.88995	2.24599	1.66662	1.96014	2.17058	2.0972	2.15647	2.5002	1.88476	1.9795	2.21671
GRMZM2G140051_P01	2.60875	2.28866	2.74128	2.76123	2.47481	2.60994	2.6617	2.45387	2.70652	2.6699	2.53835	2.82459	2.49201	2.1371	2.36903	2.61987	2.33055	2.56802	2.5611	2.37291	2.47967	2.62543	2.40374	2.70095
GRMZM2G151977_P01	1.60788	2.13102	2.00109	1.51507	2.15178	1.94995	1.51443	1.79294	1.71599	1.41244	1.7923	1.68519	1.50746	2.16385	2.0325	1.46755	2.16046	2.03632	1.50398	1.88953	1.7625	1.47119	1.91813	1.81646
GRMZM2G155753_P05	1.79405	1.50241	1.40009	1.5833	1.37882	1.31198	2.25436	1.78639	1.76569	1.86628	1.70819	1.48383	1.72129	1.51912	1.45686	1.64189	1.43187	1.33288	1.98905	1.85018	1.5872	2.14978	1.82304	1.66147
GRMZM2G165535_P05	1.86492	1.23874	1.71597	1.92074	1.25381	1.94163	2.0619	1.20752	1.86576	2.18375	1.3522	2.10986	1.83427	1.25595	1.76684	1.87117	1.24254	1.82623	2.07722	1.20207	1.82322	2.18602	1.24717	1.95049
GRMZM2G165998_P01	1.49254	1.8695	1.92238	1.59861	1.92098	1.99712	2.35914	2.54104	2.62972	2.35245	2.60489	2.79959	1.67061	1.96887	2.06728	1.637	1.83776	1.98091	2.53259	2.74157	2.89663	2.35707	2.51539	2.70636
GRMZM2G168412_P02	1.24467	1.45574	0.948549	1.41552	1.67456	1.0944	1.44866	1.77611	1.27334	1.68713	2.1081	1.39945	1.29315	1.46624	1.07246	1.31708	1.5448	1.04684	1.3134	1.43702	1.0604	1.28039	1.53743	1.10456
GRMZM2G178576_P02	2.34085	2.00829	1.86508	2.69652	2.19253	2.14634	2.64271	1.98075	1.98123	3.10649	2.5107	2.3971	2.24286	1.90111	1.8101	2.45093	2.05722	1.8596	2.65974	2.10556	1.92243	2.85991	2.24384	2.01813
GRMZM2G314652_P02	2.4683	2.74748	2.14144	2.53702	2.83119	2.32623	2.18143	2.54312	1.91903	2.36876	2.52999	2.17249	2.11663	2.31113	1.74582	2.10415	2.39238	1.91706	2.08386	2.22304	1.84336	2.13986	2.42166	1.93456
GRMZM2G327595_P01	2.74891	3.46005	2.94694	2.03438	2.90824	2.32728	1.66603	2.28408	1.64758	1.46765	2.13264	1.52304	2.60684	3.43119	2.84474	2.34694	3.16915	2.43647	1.58157	2.28033	1.58252	1.54768	2.33432	1.69143
GRMZM2G345055_P02	0.926153	0.939638	0.753902	0.899296	0.836344	0.7052	0.897266	0.884948	0.77343	0.93769	0.885311	0.716493	0.788084	0.850789	0.764332	0.804973	0.811543	0.748569	0.83866	0.882586	0.723002	0.907879	0.908841	0.815073
GRMZM2G373175_P01	0.137759	0.52568	0.362191	0.141039	0.499517	0.384068	0.113406	0.486384	0.364837	0.11894	0.519397	0.404641	0.129198	0.489371	0.378184	0.122689	0.486848	0.36997	0.117205	0.464496	0.394295	0.119763	0.528307	0.341815
GRMZM2G434696_P03	1.52373	1.54957	1.41582	1.4529	1.3784	1.31339	1.47553	1.44901	1.24472	1.38842	1.45945	1.22868	1.53598	1.60744	1.48266	1.42237	1.45838	1.49012	1.57333	1.52408	1.37811	1.62773	1.57367	1.4465
GRMZM2G471904_P01	2.86652	2.41751	2.2084	2.31937	2.01332	1.87015	3.00041	2.46954	2.17475	2.69506	2.39531	2.01581	2.76794	2.37312	2.3089	2.64478	2.38323	2.04636	3.01708	2.49346	2.21593	2.68884	2.4545	2.1597
GRMZM5G813886_P01	1.99775	1.77817	1.64554	1.80872	1.61836	1.41891	2.24778	1.85571	1.77852	2.14559	1.90529	1.74598	1.87072	1.61836	1.59434	1.85477	1.64209	1.54264	2.12074	1.79646	1.63894	1.95393	1.78556	1.63514
GRMZM5G818186_P01	1.2948	1.3823	1.48287	1.23679	1.44833	1.54491	1.41943	1.53849	1.65328	1.41273	1.5211	1.64377	1.44218	1.44315	1.60408	1.25802	1.44301	1.56226	1.47605	1.57101	1.74657	1.46	1.65261	1.76226
GRMZM2G001508_P01	3.37569	3.06393	2.55793	3.61885	3.02246	2.91905	2.08294	1.69021	1.69921	2.1947	1.80078	1.74756	2.05604	1.62223	1.60029	2.49339	2.10825	1.9697	1.56557	1.34269	1.26598	1.61282	1.34946	1.24028
GRMZM2G008263_P02	2.53736	2.01733	2.08314	2.35372	1.81562	1.87	3.55008	2.75438	2.68107	3.08156	2.39405	2.37106	2.42604	1.94045	1.99144	2.69517	2.09462	2.15832	2.8739	2.35379	2.26345	3.48216	2.62975	2.58152
GRMZM2G023528_P03	1.3982	2.94129	2.4403	1.26623	2.67718	2.36268	1.60167	3.39729	3.13684	1.27402	2.87432	2.46015	1.46808	3.22112	2.84163	1.31824	2.83704	2.42783	1.322	3.08193	2.60292	1.35157	2.96983	2.72762
GRMZM2G032258_P01	1.19038	1.70896	1.68211	1.40816	2.16111	2.0144	1.27391	1.89277	1.99863	1.34494	2.0416	2.06797	1.14356	1.74034	1.71772	1.28734	1.97233	1.84419	1.14677	1.66781	1.78197	1.20495	1.8151	1.89301
GRMZM2G060977_P02	1.6233	1.72302	1.62579	1.54565	1.66924	1.41152	1.73218	1.89045	1.85012	1.66504	1.85436	1.7163	1.49291	1.65588	1.54534	1.50828	1.63297	1.39043	1.6686	1.80613	1.74339	1.76405	1.76796	1.71711
GRMZM2G061187_P01	1.42944	1.43713	0.817142	1.52273	1.43334	0.9077	0.999252	1.01638	0.586795	1.10793	1.1297	0.715786	1.39782	1.5015	0.850729	1.43565	1.35648	0.809574	1.05825	1.04892	0.659751	1.04893	1.07655	0.652523
GRMZM2G082916_P01	0.360316	0.612713	0.925225	0.394274	0.628274	1.00197	0.370881	0.612891	0.936774	0.39643	0.695271	1.04025	0.378499	0.601131	1.00722	0.371168	0.606061	1.08778	0.362508	0.615326	0.993569	0.365922	0.628334	1.00722
GRMZM2G086845_P01	5.42147	5.90563	5.22835	5.98589	6.22215	5.324	4.7517	5.07521	4.46881	5.09395	5.52953	4.57732	5.27354	5.65109	4.92906	5.23478	6.13851	4.93317	4.95312	5.63905	4.64005	5.28555	5.83883	4.89923
GRMZM2G090068_P01	0.904181	0.871109	0.711688	0.911414	0.819695	0.723321	1.038	0.898902	0.776788	0.972232	0.883628	0.767612	0.980988	0.863013	0.69059	0.938064	0.79716	0.740517	1.19028	0.894729	0.766383	1.06484	0.971765	0.823102
GRMZM2G093347_P01	1.7436	2.02573	2.40677	1.71846	2.15455	2.2938	1.9262	2.35834	2.63086	2.00631	2.4713	2.6355	1.76112	1.97165	2.32025	1.70701	2.09902	2.32465	2.08348	2.40573	2.65638	2.05383	2.51368	2.73178
GRMZM2G096705_P01	1.43468	1.35605	1.10546	1.66291	1.45297	1.23372	1.66424	1.54231	1.24898	1.86065	1.76048	1.39139	1.46339	1.26139	1.14947	1.40641	1.34808	1.25506	1.75675	1.56318	1.3423	1.75098	1.71554	1.27363
GRMZM2G100146_P01	1.6863	1.06399	1.21253	1.98659	1.27856	1.54588	2.29808	1.37568	1.65467	2.80944	1.95482	2.29695	1.59806	1.01298	1.23721	1.71471	1.14734	1.30001	2.31596	1.52902	1.74839	2.59086	1.63761	2.00435
GRMZM2G111907_P01	0.213634	0.485692	0.362475	0.268063	0.463219	0.372895	0.250666	0.475528	0.410363	0.246652	0.576377	0.366615	0.250297	0.487091	0.356161	0.242983	0.487184	0.34304	0.245521	0.505181	0.382648	0.282184	0.519728	0.405803
GRMZM2G113232_P01	0.515621	0.537196	0.395573	0.47244	0.489163	0.37506	0.510886	0.472456	0.368089	0.508389	0.521988	0.373865	0.475405	0.475348	0.359286	0.471555	0.463888	0.377569	0.516089	0.505763	0.377768	0.529615	0.534197	0.372789
GRMZM2G117746_P01	0.83146	0.831757	0.980035	0.904231	0.959237	1.09911	0.906426	0.876146	0.963298	1.0117	1.02383	1.11948	0.775996	0.75605	0.898549	0.784944	0.788387	0.93164	0.897984	0.849496	0.986825	0.887262	0.915103	1.02106
GRMZM2G119345_P01	2.47552	1.62858	1.59094	2.432	1.61602	1.58123	2.55406	1.67882	1.52056	2.47877	1.54662	1.68009	2.46952	1.68607	1.63867	2.48252	1.59815	1.68996	2.61809	1.61812	1.64676	2.48953	1.62762	1.65178
GRMZM2G119640_P04	1.5233	1.14099	0.964259	1.43682	1.15353	0.83529	1.63971	1.12129	1.00494	1.5631	1.19035	0.891931	1.29237	1.071	0.826625	1.35504	1.08647	0.781386	1.48382	1.07639	0.824892	1.70583	1.15998	0.870679
GRMZM2G142437_P01	1.82994	1.06976	1.10388	1.78678	1.11065	1.0869	2.14839	1.39144	1.3267	2.05426	1.3244	1.24888	1.74895	1.10194	1.18093	1.8342	1.08674	1.19958	2.29475	1.43737	1.4738	2.30274	1.4777	1.37933
GRMZM2G146514_P03	1.80122	2.05676	1.63525	1.48997	1.85669	1.42711	1.77071	2.18274	1.74267	1.57101	1.84963	1.52698	1.63475	2.17589	1.6126	1.51252	1.90712	1.60231	1.59796	1.98371	1.74044	1.62186	1.98744	1.71264
GRMZM2G152526_P01	1.68915	2.1148	1.92802	1.68949	2.01572	1.85288	2.07141	2.45929	2.3962	1.9194	2.32316	2.14352	1.56276	1.88271	1.83088	1.48607	1.83838	1.74367	1.77014	2.15872	1.95547	1.81158	2.20722	2.14936
GRMZM2G153704_P01	0.498125	0.374226	0.502415	0.55723	0.386531	0.463427	0.445675	0.366201	0.480605	0.509002	0.412325	0.582134	0.494897	0.336471	0.499378	0.511138	0.37415	0.511228	0.485708	0.385537	0.452522	0.498224	0.364558	0.508291
GRMZM2G156068_P01	1.56613	1.21301	1.47846	1.96301	1.4275	1.86312	1.284	1.10934	1.34623	2.09835	1.68541	2.09456	1.60886	1.25193	1.56255	1.66135	1.36566	1.7474	2.12322	1.59301	2.17418	1.69507	1.35414	1.73351
GRMZM2G157018_P01	1.25534	1.6227	1.3744	1.5936	1.98945	1.88591	1.29739	1.5292	1.46152	1.70479	2.30773	2.17068	1.14081	1.45522	1.35643	1.30469	1.67952	1.53183	1.40437	1.86573	1.71949	1.299	1.55045	1.49974
GRMZM2G165901_P01	2.01691	1.34178	1.39351	2.0728	1.35592	1.39049	3.18456	1.95192	2.2832	2.93436	1.97889	1.94726	2.03466	1.2614	1.45998	1.86134	1.26549	1.32129	2.8817	1.95549	2.12825	3.01366	1.88912	2.07602
GRMZM2G177812_P01	1.39895	1.65575	1.60008	1.8148	2.0495	2.03022	1.38681	1.58734	1.73387	1.79931	2.16884	1.97664	1.34634	1.51029	1.65909	1.4531	1.703	1.665	1.38583	1.6503	1.75721	1.41486	1.67497	1.57789
GRMZM2G308687_P01	1.17949	1.67337	1.91729	1.40172	2.17948	2.62256	0.561582	0.906795	0.918891	0.700915	1.15066	1.19575	0.925439	1.47517	1.63891	1.00279	1.6054	1.70558	0.655052	1.04024	1.05416	0.57302	0.968878	0.946864
GRMZM2G349791_P01	0.98496	1.10788	1.3725	1.07679	1.23062	1.58854	1.87003	2.15872	2.70857	2.0566	2.36747	2.91554	1.10808	1.23685	1.62838	1.09817	1.2128	1.65928	2.47824	2.98354	3.68742	2.32713	2.70212	3.43976
GRMZM2G393334_P01	1.7708	1.50343	1.64138	1.8129	1.51497	1.51535	1.92635	1.68214	1.79992	2.06085	1.74536	1.82252	1.69089	1.451	1.70561	1.70391	1.47683	1.61812	1.96595	1.76891	1.92285	2.06834	1.85736	1.97424
GRMZM2G401664_P01	2.65928	1.99771	1.79659	2.4361	1.87969	1.64774	2.44465	1.91067	1.57358	2.29897	2.04934	1.53041	2.92705	2.31383	1.94961	2.65539	2.17748	1.77239	2.96956	2.39603	1.94561	2.60899	2.27527	1.78406
GRMZM2G444623_P02	0.55831	0.25049	0.613486	0.631371	0.271397	0.561567	2.00528	1.35886	1.72225	1.58054	1.03564	1.47321	0.630245	0.357132	0.647444	0.61516	0.357758	0.723386	1.94866	1.21218	1.52518	2.03044	1.15654	1.73348
GRMZM2G446625_P03	0.571952	0.514162	0.272125	0.60675	0.420583	0.191787	0.629365	0.505641	0.26793	0.634801	0.514558	0.223983	0.637674	0.479188	0.269699	0.563642	0.478098	0.228759	0.64917	0.535265	0.261663	0.706646	0.552505	0.284054
GRMZM2G456023_P02	1.38116	0.844641	0.981026	1.40439	0.86147	1.02735	1.34517	0.907944	0.973929	1.40126	0.921869	1.0175	1.33037	0.777066	0.982505	1.307	0.812519	1.0033	1.4321	0.931608	1.00685	1.39855	0.942884	1.00754
GRMZM2G479340_P01	2.28196	1.9258	2.38677	2.34322	2.06876	2.51143	2.09085	1.9869	2.20108	2.18418	1.97452	2.33	2.21603	2.00626	2.41515	2.19554	2.01445	2.3255	2.38932	2.01146	2.44117	2.29889	2.01186	2.3889
GRMZM5G818058_P02	2.30922	2.22411	1.95066	2.09901	2.11346	1.85673	1.97539	2.01188	1.61054	2.02475	2.22736	1.68521	2.59368	2.7111	2.50098	2.40793	2.68158	2.37069	2.44187	2.66228	2.07939	2.14815	2.36823	1.94579
GRMZM5G881464_P02	1.12017	1.13765	1.09957	1.21897	1.21829	1.09635	1.20548	1.0871	0.94785	1.27834	1.33067	1.06037	0.963184	0.965793	0.902739	0.971397	1.03632	1.00582	1.10516	1.06783	0.94868	1.13731	1.15634	0.93862
GRMZM5G859130_P01	0.768524	1.51902	1.35311	0.743463	1.35574	1.23042	0.742415	1.40154	1.30455	0.741448	1.43381	1.32186	0.771586	1.45002	1.35906	0.744269	1.37329	1.16711	0.730328	1.14131	1.06268	0.757968	1.32526	1.2012
GRMZM2G000964_P01	1.86685	1.74163	1.49845	1.97291	1.73867	1.5441	1.87378	1.65515	1.45176	2.00009	1.87351	1.53008	1.74673	1.70683	1.46518	1.85485	1.78878	1.56544	1.79957	1.70735	1.41789	1.88521	1.78808	1.5271
GRMZM2G004534_P01	7.65943	7.52075	7.11271	6.74673	6.59542	6.40638	7.45785	7.74162	7.24868	7.23915	7.18184	6.56382	7.31205	7.75609	7.48699	6.91037	7.4286	6.6039	7.99416	7.94496	7.29448	7.68026	7.83072	7.28303
GRMZM2G014577_P01	0.965218	0.809563	0.573214	1.26849	0.638146	0.530425	1.11695	1.16074	1.34559	1.39763	1.90419	1.87314	0.868073	0.553272	0.606001	1.17081	0.621695	0.836382	1.12083	1.77298	1.88323	1.092	1.53942	1.35202
GRMZM2G017159_P01	1.07282	0.985017	0.997459	0.961805	0.980293	0.984304	1.35916	1.31377	1.41336	1.23052	1.30535	1.22049	0.996438	0.910558	0.938261	0.890888	0.938698	0.944535	1.25403	1.27156	1.24113	1.23434	1.29477	1.26046
GRMZM2G023163_P01	2.06179	1.01961	0.986348	1.98217	1.03788	0.969805	2.50933	1.22875	1.27192	2.5134	1.26639	1.24832	1.98502	1.01104	1.00067	2.03613	0.984288	1.0034	2.41505	1.16879	1.24095	2.49711	1.28325	1.27858
GRMZM2G036134_P01	2.01103	2.16994	2.14746	2.45972	2.66403	2.76781	2.64672	2.57284	2.74137	3.00048	3.14432	3.0427	1.74075	1.8953	1.87876	1.86249	2.10117	2.02377	2.10044	2.18373	2.1771	2.17839	2.26867	2.22103
GRMZM2G042516_P01	0.886638	1.3694	1.51441	0.829409	1.24765	1.4036	1.37715	1.95996	2.19334	1.20153	2.02359	2.174	1.05376	1.51304	1.63736	0.901325	1.41044	1.65011	1.43743	2.18597	2.20234	1.31276	2.28995	2.22483
GRMZM2G050218_P01	1.57072	1.98512	1.7999	1.58677	1.88562	1.78025	1.49715	1.88601	1.80944	1.38269	1.89877	1.69157	1.49853	1.82419	1.75969	1.43313	1.78259	1.68643	1.46815	1.8711	1.65907	1.56286	1.86659	1.81367
GRMZM2G052610_P01	2.23481	2.11856	2.14772	2.25025	2.12327	2.10494	2.24913	2.0776	2.0289	2.29256	2.22834	2.10473	2.57172	2.5339	2.60036	2.46158	2.40953	2.45103	2.59298	2.34242	2.37139	2.34696	2.16637	2.19093
GRMZM2G076962_P02	2.04935	1.6607	1.15375	1.90476	1.64136	1.12982	2.04854	1.55807	1.07522	2.01591	1.60434	1.03882	1.91863	1.59426	1.16565	1.98389	1.71027	1.20274	1.99511	1.53295	1.11322	2.08382	1.69804	1.12078
GRMZM2G077780_P01	1.40793	1.15494	1.18357	1.3541	1.04356	1.07133	1.36295	1.06323	1.08664	1.33354	1.14225	1.08733	1.38394	1.1589	1.21093	1.34682	1.12165	1.09278	1.41536	1.15983	1.11887	1.39537	1.15564	1.14855
GRMZM2G080650_P01	2.98556	2.44743	2.59666	2.674	2.22472	2.37496	1.4319	0.980493	1.0463	1.38612	0.790527	1.10545	2.901	2.59659	2.55065	2.69785	2.1996	2.20053	1.49771	0.915249	1.0923	1.42586	0.845395	1.03315
GRMZM2G090500_P01	0.204801	0.0848268	0.403546	0.312052	0.152207	0.53392	0.236284	0.136975	0.49705	0.347732	0.174306	0.658081	0.206238	0.100666	0.401085	0.2107	0.106623	0.492653	0.233145	0.114694	0.500277	0.249047	0.129703	0.513387
GRMZM2G095252_P02	24.1295	23.5215	23.4949	25.7771	25.5801	24.2604	20.4725	23.792	24.3903	21.2407	26.3629	26.4195	23.0748	22.2192	24.0702	24.6247	22.7698	23.7308	20.639	24.0002	24.554	20.0417	24.7543	24.0798
GRMZM2G102779_P01	2.16882	2.04776	2.83051	2.51537	2.35812	3.6015	2.30944	2.20708	2.98217	2.68887	2.25802	3.53143	2.1315	1.89948	2.79735	2.40341	2.30047	3.05915	2.48605	1.94687	3.15142	2.29655	1.98221	3.04647
GRMZM2G114588_P01	2.93123	2.33185	2.6421	2.08746	1.64513	2.04857	1.73922	1.30609	1.59979	1.45103	1.24602	1.46413	3.41519	2.46315	3.2381	2.60146	2.10568	2.58954	1.93788	1.49655	1.75525	1.83653	1.40553	1.66252
GRMZM2G126266_P02	1.32222	1.95736	1.26413	1.48531	2.11506	1.44598	1.34969	1.93812	1.37261	1.63831	2.30133	1.54404	1.18647	1.81871	1.23074	1.29263	1.88518	1.41154	1.35871	1.97317	1.38501	1.36667	2.01107	1.34595
GRMZM2G134797_P02	1.59806	2.20544	1.79517	1.72358	2.16746	1.60741	1.66678	2.26119	1.85206	1.79311	2.56283	1.79975	1.78805	2.52951	2.13493	1.67935	2.34893	1.78583	1.95339	2.58638	2.04387	1.79768	2.33827	1.98099
GRMZM2G138782_P01	2.19346	0.844604	1.62985	2.30549	0.868387	1.7741	2.6977	0.990697	1.87617	2.56951	0.889177	1.83433	2.02148	0.785229	1.72167	2.39394	0.911746	1.74577	2.30953	0.859408	1.6896	2.50889	0.850752	1.72851
GRMZM2G153162_P02	2.23422	2.33251	2.64617	2.27472	2.27344	2.65585	2.13152	2.32898	2.67652	2.16374	2.42381	2.59019	1.96705	2.00024	2.26998	2.05656	2.21956	2.47874	1.99368	2.20355	2.29274	2.17851	2.21791	2.3898
GRMZM2G168849_P01	0.66974	0.987498	1.02477	0.769369	1.05126	1.12235	0.757293	0.958948	1.09544	0.788677	1.06648	1.16918	0.728788	0.996326	1.11239	0.767403	1.01257	1.1677	0.758557	0.933686	1.20711	0.760172	0.993227	1.10105
GRMZM2G451224_P01	3.22838	1.47489	1.39151	3.14588	1.42956	1.44564	4.7087	2.00955	1.79553	3.59116	1.69959	1.55295	3.89711	1.70542	1.6075	3.6894	1.81014	1.65084	4.92476	2.14673	1.94354	3.8146	1.72412	1.61249
GRMZM2G001755_P01	0.982559	1.51152	0.604404	1.05834	1.72039	0.723947	0.97699	1.39915	0.619219	1.09265	1.49371	0.685224	0.905884	1.45081	0.597478	0.979774	1.53112	0.61693	1.06063	1.50677	0.592359	0.943177	1.38653	0.56044
GRMZM2G002652_P01	1.8807	1.83713	2.26178	1.86184	1.76098	2.2145	1.80031	1.6094	2.15284	1.77707	1.58367	2.06361	1.73212	1.63972	2.14357	1.64468	1.48444	2.04251	1.65821	1.51704	2.04668	1.64506	1.56763	2.0745
GRMZM2G003318_P01	3.1307	2.47653	2.3142	2.39674	1.8718	1.77595	2.99671	2.31615	2.16579	2.51881	1.97676	1.80828	3.15455	2.5008	2.38863	2.71022	2.18299	2.05275	3.0783	2.32228	2.23209	3.01397	2.35269	2.26232
GRMZM2G003385_P01	8.15742	8.69394	8.72477	7.70193	9.55165	7.70557	12.0334	12.1274	12.4174	11.0513	10.5043	11.5125	8.97952	9.55341	9.30318	9.03116	10.521	10.111	13.1459	12.3946	12.7602	12.8995	12.6538	13.4654
GRMZM2G007939_P01	1.0906	1.39173	1.38936	1.23801	1.37576	1.54357	1.24528	1.53033	1.68	1.40062	1.71459	1.92631	1.14333	1.29657	1.42766	1.25067	1.47357	1.64284	1.21897	1.53587	1.5704	1.41251	1.68159	1.81987
GRMZM2G009479_P01	15.8075	13.424	16.2072	22.5878	18.4249	21.6096	9.62875	9.51519	9.36678	11.5732	10.9042	11.0818	10.4652	9.90993	10.3991	12.313	12.6538	13.2827	8.30584	8.12323	7.68657	9.31874	9.04478	8.36622
GRMZM2G018223_P01	0.475432	0.583311	0.466268	0.535553	0.568116	0.472686	0.522551	0.659224	0.514574	0.56529	0.682104	0.528086	0.445694	0.594751	0.470659	0.43652	0.578735	0.462407	0.481057	0.655939	0.540344	0.537904	0.677821	0.544976
GRMZM2G020146_P01	1.30445	1.32202	1.37336	1.33298	1.22874	1.27018	1.05191	1.06462	1.05019	1.06195	1.08328	1.03326	1.0984	1.12235	1.12097	1.16458	1.19224	1.18711	1.03408	0.993376	0.97929	0.951658	0.993376	0.98564
GRMZM2G022856_P01	0.934712	1.23035	0.939007	0.966655	1.2182	1.05957	0.78943	1.03791	0.765296	0.802612	1.10643	0.824397	0.884104	1.1436	0.870922	0.884681	1.13073	0.925579	0.841482	1.07362	0.784019	0.896323	1.05917	0.831206
GRMZM2G023840_P01	2.19638	2.1096	2.55259	2.17992	2.09969	2.54689	2.19616	1.9816	2.53187	1.94214	1.95538	2.47104	2.0236	1.81623	2.26989	2.07168	2.04911	2.52955	2.18518	1.93783	2.33176	2.20494	2.05056	2.76642
GRMZM2G027331_P01	1.60018	1.7822	1.22535	1.54315	1.72027	1.22484	1.42552	1.74666	1.21498	1.37696	1.63562	1.16469	1.56997	1.73511	1.22574	1.54993	1.87894	1.34681	1.46021	1.74336	1.25854	1.47408	1.75783	1.33904
GRMZM2G028139_P01	0.494372	0.348173	0.698345	0.480173	0.410472	0.801854	0.52923	0.359083	0.762704	0.528043	0.419321	0.837898	0.490763	0.330297	0.649371	0.453626	0.350838	0.72666	0.488911	0.391921	0.733739	0.534882	0.389895	0.78943
GRMZM2G029856_P01	1.95785	1.76627	1.4862	2.30525	2.06056	1.71524	1.79538	1.66732	1.37625	2.23515	2.13843	1.65323	1.8649	1.83279	1.44709	1.91579	1.83718	1.44404	2.02103	1.87493	1.47258	1.90465	1.82252	1.40536
GRMZM2G030169_P01	13.3956	13.332	14.1688	14.9358	12.1841	11.8533	13.7841	14.2169	15.4921	16.1427	13.3385	14.8903	13.9535	13.8969	15.2003	14.32	13.2024	14.1589	15.542	14.971	15.1172	14.9262	14.8582	16.1192
GRMZM2G032266_P01	1.15713	1.75662	1.50662	1.16892	2.14204	1.86947	1.02846	1.65192	1.48606	1.22934	2.31751	2.09386	1.09593	1.70802	1.45367	1.1429	1.91869	1.57692	1.13397	1.86473	1.62558	1.04334	1.64048	1.38782
GRMZM2G038153_P01	0.926995	0.685576	0.624721	0.891905	0.673987	0.55994	1.60263	1.155	1.18493	1.59728	1.12842	1.22877	0.959459	0.756284	0.66124	1.00159	0.81818	0.674734	2.06397	1.32362	1.6235	1.95617	1.45893	1.44218
GRMZM2G043878_P01	2.78131	2.32286	1.95158	2.65509	2.27225	2.05588	2.76041	2.20199	2.06617	2.97049	2.81902	2.38053	1.97599	1.65883	1.51439	1.80417	1.50813	1.37553	2.65564	2.2596	1.96022	3.3969	2.9573	2.69571
GRMZM2G046005_P01	1.26605	1.28715	1.47341	1.51501	1.57333	1.5975	1.52167	1.7492	1.90488	2.01507	1.92885	2.42652	1.103	1.09242	1.35557	1.26454	1.20377	1.3828	1.56613	1.58595	1.91039	1.74852	1.57932	1.94892
GRMZM2G051270_P01	2.96404	3.61967	2.51709	3.35613	3.83347	3.08484	2.54269	2.16903	1.86788	2.60773	2.58076	2.14794	3.24473	4.00299	3.13209	3.22948	3.95276	2.75285	2.46956	2.43371	1.71112	2.58564	2.40761	1.78618
GRMZM2G057535_P01	20.1003	20.9697	19.4257	19.6915	17.4266	18.0004	17.6513	16.4497	16.6553	16.6622	12.2841	14.1101	20.9222	22.2497	20.017	19.3156	19.231	16.9255	20.2965	20.7219	19.085	20.3605	19.6672	21.781
GRMZM2G059449_P01	0.340468	0.243457	0.112736	0.463059	0.269665	0.17547	0.355028	0.236718	0.0971392	0.45852	0.30238	0.163419	0.344797	0.219743	0.0802488	0.373045	0.276847	0.110875	0.348464	0.222704	0.147465	0.31662	0.228487	0.112647
GRMZM2G059693_P04	2.08538	1.98877	1.65128	1.96519	1.94916	1.76384	1.1762	1.18391	1.07851	1.25263	1.37542	1.25124	1.26235	1.19183	1.07038	1.40451	1.44117	1.34068	0.894788	0.92071	0.891318	0.958965	0.94903	0.952751
GRMZM2G061988_P01	2.87037	1.5454	1.27052	3.02263	1.61925	1.33619	2.76866	1.54668	1.24331	2.97236	1.66175	1.20323	2.90772	1.57787	1.24405	2.90369	1.65554	1.3195	2.804	1.64694	1.17614	2.75057	1.74658	1.20707
GRMZM2G072806_P01	1.72038	1.52729	1.77419	1.83099	1.53641	1.77312	1.61845	1.20837	1.68907	1.89009	1.39527	1.95806	1.64122	1.42209	1.68548	1.74948	1.41227	1.71595	1.79521	1.25205	1.76362	1.75418	1.24625	1.6405
GRMZM2G090010_P02	1.14649	1.22371	1.25311	1.07676	1.17847	1.13376	1.1704	1.29523	1.26194	1.12179	1.2991	1.17249	1.14626	1.22084	1.30849	1.09383	1.19505	1.27052	1.1274	1.25972	1.28313	1.11707	1.32788	1.31656
GRMZM2G097106_P01	0.907508	1.63559	1.58049	1.00599	1.62394	1.67018	0.983824	1.63023	1.62132	1.06159	1.79787	1.76318	0.934006	1.45929	1.47693	0.985944	1.5594	1.58885	1.01003	1.62221	1.64811	1.11111	1.67147	1.65095
GRMZM2G112057_P01	0.768457	1.88938	0.985539	0.819582	1.97114	1.06142	0.637293	1.69653	0.895816	0.707242	1.84333	0.976142	0.777868	1.94821	1.01575	0.820259	2.03768	1.09749	0.763261	1.80874	0.989378	0.706037	1.80498	0.978466
GRMZM2G114584_P03	0.74505	0.611516	0.461825	0.819657	0.682815	0.552493	0.773784	0.571832	0.475193	0.784797	0.65353	0.496602	0.686196	0.61026	0.463058	0.707126	0.595917	0.512536	0.703626	0.600399	0.526644	0.779764	0.673731	0.511648
GRMZM2G121456_P01	1.76297	1.18904	1.30172	2.28799	1.52316	1.72565	2.10551	1.28798	1.54748	2.63981	1.56011	1.84045	1.83982	1.34012	1.39018	2.04196	1.40891	1.45578	2.1627	1.36759	1.38732	2.15924	1.3231	1.35142
GRMZM2G127141_P01	2.39218	1.62647	1.99446	2.25615	1.5936	1.89451	2.15385	1.63307	1.87468	2.16775	1.6334	1.9593	2.22311	1.58303	2.07131	2.14314	1.53215	1.85751	2.31972	1.64232	2.17677	2.3441	1.75596	2.17146
GRMZM2G128214_P01	1.45356	1.73968	1.75481	1.43242	1.8371	1.78465	1.42782	1.79457	1.57268	1.5348	2.07485	1.77454	1.45212	1.73168	1.75548	1.50201	1.83747	1.80236	1.588	1.98324	1.83019	1.60928	2.00142	1.7253
GRMZM2G145595_P01	6.26112	5.67825	5.7523	6.38565	5.50933	5.76113	6.87521	6.34884	6.66716	6.81447	6.15506	6.53764	5.68323	5.48504	5.6428	5.83537	5.42911	5.61572	5.88383	5.56074	5.8777	6.26112	5.83361	6.14556
GRMZM2G156110_P01	1.91203	1.47427	1.68064	2.24686	1.98031	2.01763	2.19328	1.8337	1.98819	2.66214	2.6222	2.21157	1.63024	1.40414	1.6608	2.16932	1.9472	1.85778	2.08136	1.91263	1.81521	2.10477	1.82555	1.76817
GRMZM2G158835_P01	4.32919	4.82677	4.30252	4.72036	5.1675	4.1519	2.90898	3.31178	2.52014	2.92322	3.22164	2.34523	3.91689	4.54992	3.60998	4.24638	4.94216	3.7748	2.34616	2.95916	2.13407	2.60881	3.02106	2.16135
GRMZM2G174644_P01	2.95725	2.54922	2.32567	3.02501	2.73261	2.31244	3.08796	2.75632	2.36034	3.24125	2.87595	2.42809	3.10151	2.70995	2.40505	2.91388	2.59981	2.11261	3.30269	2.78873	2.43859	3.37046	2.9874	2.6172
GRMZM2G176546_P01	2.64537	2.51677	2.5534	2.51238	2.2863	2.39036	2.72089	2.28605	2.19673	2.32775	2.15549	2.09539	2.69812	2.57159	2.54512	2.56263	2.3314	2.33142	2.71589	2.39867	2.38911	2.81695	2.45373	2.49847
GRMZM2G320152_P02	2.36186	2.19781	2.3176	2.11504	1.95553	2.11804	0.676232	0.800376	0.661261	0.741622	0.828135	0.653069	1.87213	1.89977	2.07548	1.93245	1.86129	1.93895	0.716756	0.72197	0.620074	0.583904	0.735119	0.615523
GRMZM2G320325_P02	1.83738	2.03708	2.92794	1.75408	1.96082	2.84359	1.88174	2.13447	3.05313	1.7447	2.02929	2.85898	1.7099	1.91161	2.89479	1.62209	1.89193	2.70064	1.77103	2.01248	2.80808	1.67907	2.02232	2.91285
GRMZM2G326677_P01	0.622336	0.890883	0.503987	0.658108	0.899337	0.504344	0.618815	0.867372	0.499802	0.660937	0.932007	0.465404	0.547208	0.802561	0.505161	0.602407	0.839546	0.49771	0.617495	0.889651	0.500925	0.672694	0.878643	0.522667
GRMZM2G330635_P01	2.04609	2.34637	2.41392	2.9234	3.17013	3.20012	1.53851	1.65509	1.66349	2.04899	2.385	2.39532	1.47229	1.75273	1.77986	1.85759	2.2139	2.11776	1.56965	1.76553	1.73885	1.54349	1.71126	1.69068
GRMZM2G336065_P01	1.86623	1.59213	0.7937	1.82173	1.57586	0.648537	1.56903	1.32833	0.8192	1.52176	1.22928	0.693163	1.57293	1.26137	0.842805	1.57645	1.30461	0.701433	1.41293	1.32492	0.687649	1.65895	1.38351	0.813514
GRMZM2G409839_P01	0.12446	0.614463	0.221522	0.118287	0.539406	0.248461	0.0783607	0.665792	0.22602	0.128014	0.66919	0.239513	0.109506	0.566293	0.262964	0.164787	0.612257	0.263253	0.130136	0.651067	0.264744	0.146449	0.681531	0.273523
GRMZM2G413652_P01	3.02955	2.52864	1.66221	2.87615	2.59798	1.77044	2.82971	2.37022	1.70499	2.86086	2.517	1.71049	2.52261	2.10197	1.49472	2.63781	2.35175	1.54969	2.54554	2.19662	1.50451	2.69776	2.33581	1.60295
GRMZM2G463280_P02	2.96283	2.75692	2.57505	2.5108	2.22562	1.9896	2.34791	2.1202	1.86674	2.1028	1.92687	1.53531	3.32833	2.94914	2.91577	2.90802	2.66735	2.45195	2.45968	2.19252	1.90338	2.37962	2.16137	1.76221
GRMZM2G469162_P01	0.362254	0.531402	0.39768	0.376534	0.50711	0.315868	0.375625	0.597757	0.400286	0.394942	0.503444	0.372466	0.367709	0.462602	0.404616	0.372481	0.469477	0.348555	0.366194	0.417992	0.386529	0.384261	0.510217	0.373999
GRMZM5G815808_P01	2.7302	3.07462	2.35236	2.34369	2.61255	2.032	2.48092	2.90877	2.11565	2.25302	2.63014	2.0084	2.84956	3.19745	2.22688	2.49283	2.90437	2.29464	2.42868	2.81265	2.07803	2.4211	2.85945	1.89203
GRMZM5G832651_P01	0.755978	0.503781	0.359947	0.745984	0.477521	0.392196	0.770635	0.487318	0.35363	0.805725	0.526001	0.396555	0.680395	0.495045	0.34639	0.702825	0.492116	0.404903	0.786996	0.508831	0.358912	0.751462	0.509387	0.387467
[truncated: 4,423 more rows]
