# Supplementary material for: Comparative Proteomics Combined with Morphophysiological Analysis Revealed Chilling Response Patterns in Two Contrasting Maize Genotypes
Source: Cells. 2022 Apr 13;11(8):1321. doi: 10.3390/cells11081321 (PMC9024610; doi:10.3390/cells11081321)
Supplement: Supplementary file 1 [file cells-11-01321-s001.zip › Table S4.xlsx]

## Sheet: Abundance-average
Supplemental Table S4
The average abundance of proteins in different materials from the tolerant line KR701 and sensitive line hei8834 at the first leaf and third leaf stage.
Accession Number	first leaf stage				third leaf stage
	KR701(-)-Aundance	KR701(+)-Aundance	hei8834(-)-Aundance	hei8834(+)-Aundance	KR701(-)-Aundance	KR701(+)-Aundance	hei8834(-)-Aundance	hei8834(+)-Aundance
GRMZM2G014695_P01	0.36829	0.168808	0.191444	0.124907	0.157547	0.0947565	0.137004	0.0905777
GRMZM2G313529_P01	0.252367	0.260688	0.159971	0.164545	0.249601	0.251564	0.160319	0.167612
GRMZM2G170602_P01	0.162928	0.199989	0.110109	0.126876	0.225522	0.261989	0.121373	0.124547
GRMZM2G140893_P01	0.155269	0.169123	0.154416	0.17014	0.158779	0.228353	0.149885	0.147368
GRMZM2G162840_P01	0.157686	0.175423	0.161669	0.152338	0.162558	0.218939	0.161102	0.143619
GRMZM2G701207_P03	0.271548	0.265959	0.206443	0.180577	0.348933	0.319766	0.2181	0.188673
GRMZM2G107388_P01	0.231847	0.19778	0.159759	0.130677	0.182617	0.181906	0.126197	0.122551
GRMZM2G361398_P01	0.232942	0.234635	0.194244	0.222875	0.206801	0.211491	0.187037	0.176641
GRMZM2G098460_P01	0.22751	0.179474	0.184025	0.148597	0.17298	0.1314	0.164968	0.12438
GRMZM5G823135_P01	0.198457	0.205906	0.123231	0.13834	0.197461	0.211197	0.124812	0.133929
GRMZM2G137495_P01	0.252939	0.245368	0.26415	0.233961	0.266907	0.281859	0.221408	0.233408
GRMZM2G090020_P01	0.25907	0.254883	0.255726	0.273835	0.252077	0.254832	0.225076	0.224501
GRMZM2G070899_P02	0.311368	0.325109	0.204931	0.26455	0.327738	0.364932	0.272435	0.262271
GRMZM2G101117_P01	0.315316	0.208756	0.184878	0.157048	0.257285	0.235398	0.15184	0.156144
GRMZM2G110726_P01	0.355062	0.455257	0.368814	0.412192	0.344668	0.36873	0.362617	0.33266
GRMZM2G461666_P01	0.259505	0.261244	0.167355	0.173663	0.2235	0.250991	0.171524	0.158883
GRMZM2G107872_P02	0.142159	0.185533	0.196388	0.177936	0.128449	0.154153	0.182351	0.166364
GRMZM5G822237_P02	0.330039	0.349049	0.0937911	0.0878383	0.323076	0.320325	0.0846427	0.077905
GRMZM2G023020_P01	0.303464	0.343964	0.297	0.315589	0.281361	0.264296	0.2568	0.270859
GRMZM2G301908_P01	0.263238	0.318472	0.197981	0.294328	0.217043	0.246311	0.226936	0.235691
GRMZM2G097395_P01	0.265113	0.248878	0.191952	0.18473	0.201343	0.215252	0.181478	0.17792
GRMZM2G131177_P01	0.204838	0.24436	0.207186	0.202574	0.205708	0.22836	0.181433	0.192207
GRMZM2G136680_P01	0.246481	0.320195	0.214462	0.269815	0.245581	0.288571	0.208289	0.206606
GRMZM2G363545_P04	0.397483	0.402284	0.197286	0.209676	0.335212	0.350562	0.215967	0.224865
GRMZM2G428628_P01	0.276381	0.297363	0.221935	0.226855	0.253563	0.292644	0.207907	0.223352
GRMZM2G014902_P01	0.343739	0.215574	0.371423	0.195471	0.241266	0.202237	0.230902	0.199388
GRMZM2G006006_P01	0.344825	0.43797	0.234419	0.294781	0.266295	0.315458	0.220796	0.21879
GRMZM2G005205_P02	0.173708	0.196512	0.174827	0.150681	0.180447	0.183386	0.132229	0.141543
GRMZM2G152111_P06	0.184762	0.184051	0.166587	0.172243	0.160296	0.168792	0.142812	0.153789
GRMZM2G302074_P01	0.339839	0.3536	0.248753	0.240576	0.335608	0.317105	0.253671	0.244181
GRMZM2G384730_P01	0.174242	0.169072	0.168703	0.168788	0.16231	0.179588	0.149499	0.161131
GRMZM2G039520_P01	0.254537	0.23574	0.16443	0.180971	0.252181	0.263976	0.15886	0.155972
GRMZM2G164676_P02	0.262765	0.217936	0.195104	0.178726	0.230155	0.217483	0.177653	0.186845
GRMZM2G346263_P03	0.351203	0.305195	0.18306	0.162881	0.338333	0.293904	0.185375	0.18005
GRMZM2G128641_P01	0.305469	0.333287	0.273012	0.308188	0.287302	0.307491	0.25017	0.268414
GRMZM2G478621_P01	0.23414	0.283516	0.247456	0.261194	0.246763	0.229604	0.252666	0.244662
GRMZM2G041561_P01	0.266079	0.279726	0.237171	0.240484	0.251433	0.238075	0.234321	0.252712
GRMZM5G889052_P01	0.227492	0.260144	0.18612	0.203961	0.198912	0.209407	0.194514	0.186118
GRMZM2G164074_P01	0.165373	0.167941	0.148329	0.174649	0.169422	0.158679	0.1808	0.168139
AC233850.1_FGP003	0.210686	0.215622	0.207018	0.221248	0.210669	0.215421	0.210151	0.175852
GRMZM2G065694_P01	0.199188	0.186664	0.213811	0.20204	0.217018	0.216141	0.220636	0.211168
GRMZM2G145504_P01	0.154739	0.179722	0.15315	0.191673	0.151225	0.177112	0.172244	0.153467
GRMZM2G167549_P03	0.149377	0.21222	0.163392	0.17104	0.164705	0.154781	0.172098	0.145721
GRMZM2G163641_P01	0.132561	0.188842	0.172348	0.213474	0.148109	0.157145	0.16298	0.157875
GRMZM2G026147_P03	0.165524	0.213895	0.144865	0.149102	0.175834	0.180948	0.151203	0.151963
GRMZM2G059799_P01	0.155392	0.196552	0.16017	0.178047	0.161923	0.161306	0.168644	0.1513
GRMZM2G019738_P02	0.327928	0.318887	0.303831	0.317591	0.269055	0.254088	0.265214	0.276739
GRMZM2G073114_P01	0.207425	0.220146	0.129829	0.208641	0.127063	0.171329	0.126953	0.141948
GRMZM2G042881_P01	0.160439	0.194498	0.162986	0.17722	0.15625	0.159849	0.169989	0.152102
GRMZM2G145935_P02	0.218869	0.2213	0.223619	0.226941	0.193962	0.190613	0.193718	0.197645
GRMZM2G099891_P02	0.167649	0.165504	0.178013	0.158178	0.180389	0.165896	0.159763	0.157943
GRMZM2G102483_P02	0.746544	0.909443	0.422299	0.437237	0.814829	0.878501	0.41987	0.371275
GRMZM2G025867_P01	0.180467	0.171499	0.166385	0.168366	0.173358	0.162855	0.150166	0.160237
GRMZM2G148586_P01	0.173467	0.201051	0.207995	0.201715	0.218894	0.23081	0.219939	0.212795
GRMZM2G374629_P01	0.159077	0.157782	0.173651	0.149749	0.188144	0.172134	0.178124	0.154672
GRMZM2G144180_P01	0.194382	0.217302	0.233759	0.230927	0.210974	0.201225	0.195494	0.182604
GRMZM2G013082_P01	0.143567	0.248534	0.138463	0.223763	0.146083	0.145995	0.133199	0.153728
GRMZM2G013908_P01	0.296871	0.283426	0.284263	0.29238	0.291067	0.301478	0.294265	0.289585
GRMZM2G416684_P01	0.172275	0.17647	0.150052	0.196293	0.159	0.158061	0.156897	0.164286
GRMZM2G043331_P02	0.179446	0.215138	0.205496	0.22672	0.194129	0.205157	0.23829	0.202291
GRMZM2G009928_P01	0.366879	0.402611	0.288561	0.299207	0.355744	0.371382	0.287641	0.294643
GRMZM2G376416_P02	0.2003	0.199434	0.235095	0.21848	0.214396	0.212685	0.196254	0.190022
GRMZM2G034276_P01	0.271672	0.270375	0.251745	0.246948	0.243689	0.236308	0.234278	0.244985
GRMZM2G116427_P01	0.157925	0.215879	0.122647	0.164083	0.168399	0.208017	0.151225	0.145158
GRMZM2G422205_P01	0.25143	0.235999	0.290274	0.247582	0.230463	0.257523	0.237246	0.249483
GRMZM2G009025_P01	0.182121	0.141319	0.163571	0.134927	0.20856	0.157734	0.17984	0.165261
GRMZM2G444029_P01	0.196068	0.173187	0.168705	0.160517	0.179759	0.151433	0.154622	0.149043
GRMZM2G003179_P01	0.201346	0.219566	0.217681	0.219502	0.184112	0.208762	0.212072	0.203626
GRMZM2G136016_P01	0.246477	0.221017	0.182083	0.188997	0.225759	0.231478	0.179443	0.191412
GRMZM2G149317_P01	0.141752	0.181374	0.171431	0.195312	0.143742	0.166857	0.161524	0.171343
GRMZM2G179346_P01	0.257392	0.258275	0.231167	0.242479	0.276631	0.257395	0.229888	0.246773
GRMZM2G146267_P02	0.264763	0.24728	0.236412	0.223846	0.255326	0.261693	0.261928	0.248752
GRMZM2G058292_P01	0.254539	0.284921	0.230873	0.238289	0.259792	0.263436	0.237594	0.230555
GRMZM2G176523_P01	0.478046	0.491121	0.451796	0.434101	0.475619	0.489494	0.41429	0.4322
GRMZM2G484344_P01	0.229756	0.275677	0.255597	0.286154	0.219764	0.258578	0.240148	0.234326
GRMZM5G886363_P02	0.20331	0.187349	0.200021	0.209459	0.211434	0.223027	0.223099	0.208968
GRMZM2G077863_P01	0.174637	0.180262	0.154612	0.173139	0.164297	0.176122	0.152984	0.15728
GRMZM2G116133_P07	0.279088	0.292011	0.309627	0.319807	0.264828	0.260138	0.304561	0.303274
GRMZM2G075839_P01	0.266131	0.315356	0.17539	0.200354	0.323299	0.293936	0.237328	0.188206
GRMZM2G021598_P02	0.182082	0.178857	0.166454	0.16181	0.166661	0.17692	0.143128	0.157421
GRMZM2G039993_P01	0.251873	0.277111	0.179533	0.177817	0.198694	0.2375	0.167988	0.176151
GRMZM2G059449_P01	0.23222	0.302731	0.229628	0.308106	0.21493	0.253589	0.239544	0.219251
GRMZM2G010836_P02	0.188175	0.227467	0.177438	0.2127	0.217538	0.222181	0.216809	0.20436
GRMZM2G352601_P01	0.247067	0.270009	0.240598	0.272109	0.238005	0.262275	0.239094	0.230844
GRMZM2G068010_P01	0.166226	0.182649	0.156467	0.178213	0.152955	0.161515	0.164416	0.170892
GRMZM2G174855_P01	0.160809	0.176339	0.178943	0.191404	0.141891	0.160165	0.160683	0.163101
GRMZM5G800586_P01	0.149233	0.157396	0.163587	0.20574	0.148357	0.17332	0.166761	0.168938
GRMZM2G056247_P01	0.198762	0.240568	0.197001	0.221832	0.201743	0.198997	0.203414	0.20435
GRMZM2G122943_P01	0.20646	0.227548	0.218644	0.222959	0.209424	0.19741	0.195916	0.188306
GRMZM2G173978_P01	0.15088	0.170639	0.166834	0.175877	0.171901	0.161593	0.168064	0.167547
GRMZM2G098819_P02	0.185211	0.222521	0.197391	0.232775	0.190948	0.209383	0.228166	0.200271
GRMZM2G116053_P01	0.268535	0.315065	0.221209	0.295182	0.193391	0.2284	0.229533	0.248685
GRMZM2G006229_P02	0.154654	0.195323	0.163521	0.223048	0.14463	0.153556	0.139693	0.158907
AC209705.3_FGP004	0.217729	0.222169	0.215007	0.213203	0.198302	0.212184	0.198107	0.189964
GRMZM2G132504_P04	0.251009	0.232049	0.259194	0.246846	0.252278	0.230001	0.266907	0.261716
GRMZM2G079499_P01	0.191069	0.22743	0.196294	0.206714	0.209434	0.208848	0.208033	0.218844
GRMZM2G150014_P01	0.238728	0.273936	0.235818	0.248324	0.243189	0.242673	0.257641	0.259692
AC203753.4_FGP007	0.239454	0.224843	0.262466	0.272896	0.226886	0.242494	0.253814	0.277147
GRMZM2G113276_P01	0.171461	0.170522	0.165759	0.181687	0.157244	0.158106	0.167236	0.161317
GRMZM2G146240_P01	0.228279	0.212185	0.194036	0.194778	0.232698	0.202204	0.209846	0.192641
GRMZM2G046021_P01	0.242642	0.251603	0.243479	0.273525	0.234401	0.239633	0.260166	0.25455
GRMZM2G005126_P01	0.256176	0.269998	0.253525	0.271722	0.228021	0.237258	0.225001	0.258299
GRMZM2G112535_P01	0.151505	0.181525	0.143504	0.196262	0.146416	0.172208	0.178984	0.162928
GRMZM2G124203_P02	0.15875	0.179131	0.130444	0.148064	0.163795	0.210027	0.176894	0.166228
GRMZM2G026654_P04	0.186974	0.168719	0.177622	0.154045	0.169098	0.179345	0.142624	0.154906
GRMZM2G319169_P01	0.176554	0.161363	0.173724	0.156186	0.182917	0.156778	0.170619	0.155192
GRMZM2G110143_P02	0.167089	0.179942	0.175257	0.19419	0.148756	0.154793	0.153401	0.159905
GRMZM2G061043_P01	0.249866	0.26257	0.278594	0.267157	0.223129	0.229046	0.236831	0.252806
GRMZM2G158437_P02	0.16594	0.184482	0.166187	0.169197	0.17122	0.159352	0.157995	0.15896
GRMZM2G097426_P02	0.256251	0.263532	0.243176	0.265066	0.247275	0.252432	0.230505	0.241764
GRMZM5G823004_P01	0.228741	0.227491	0.199853	0.205973	0.208431	0.199317	0.19235	0.204511
GRMZM2G448456_P01	0.210618	0.228716	0.177244	0.201092	0.225563	0.227534	0.198845	0.197056
AC205703.4_FGP002	0.18176	0.157549	0.164575	0.163704	0.161318	0.179094	0.167248	0.158083
GRMZM2G111713_P01	0.193223	0.204368	0.198826	0.278429	0.180528	0.198353	0.214055	0.198885
GRMZM2G123159_P01	0.336654	0.394756	0.272483	0.34914	0.348922	0.362155	0.298716	0.303841
GRMZM2G399750_P02	0.21702	0.251887	0.171444	0.177438	0.205843	0.272673	0.17817	0.192192
GRMZM2G178769_P01	0.232946	0.280318	0.169251	0.179792	0.213219	0.246126	0.16836	0.176655
GRMZM2G415327_P05	0.19789	0.227763	0.205146	0.21038	0.210075	0.196661	0.198227	0.220523
GRMZM2G165919_P01	0.212235	0.206154	0.193312	0.181662	0.218514	0.196476	0.2632	0.195114
GRMZM2G071163_P01	0.40517	0.370931	0.366217	0.34023	0.391526	0.384425	0.377155	0.364346
GRMZM2G093405_P06	0.4073	0.499335	0.240205	0.306069	0.338781	0.378677	0.261387	0.234912
GRMZM2G170805_P01	0.312863	0.322836	0.309229	0.343012	0.330201	0.340591	0.382919	0.325016
GRMZM2G053927_P02	0.165221	0.161408	0.173304	0.17134	0.15554	0.157659	0.178165	0.170697
GRMZM2G006806_P01	0.161952	0.187914	0.152504	0.18534	0.164115	0.165918	0.153615	0.161975
GRMZM2G059565_P01	0.16583	0.184948	0.160397	0.17932	0.161037	0.169913	0.155127	0.156761
GRMZM2G044348_P02	0.294113	0.324208	0.259082	0.317101	0.284862	0.27867	0.278931	0.296367
GRMZM2G142217_P01	0.215425	0.218319	0.19742	0.22241	0.204557	0.207246	0.203336	0.197954
GRMZM2G126834_P02	0.182223	0.183238	0.148832	0.134537	0.208753	0.180069	0.160206	0.135475
GRMZM2G149422_P01	0.294626	0.401714	0.341365	0.326353	0.304587	0.330075	0.33157	0.336377
GRMZM2G318860_P02	0.23804	0.247488	0.225435	0.244198	0.243432	0.260859	0.262844	0.277703
GRMZM2G050186_P03	0.271168	0.282226	0.337448	0.348624	0.267542	0.268374	0.265409	0.292542
GRMZM2G024211_P01	0.175595	0.185787	0.152884	0.168106	0.162297	0.165596	0.157792	0.165276
GRMZM5G834128_P01	0.226691	0.217739	0.21293	0.205922	0.201072	0.197556	0.197698	0.207059
GRMZM2G098857_P02	0.172036	0.196101	0.22796	0.224951	0.211423	0.195287	0.230178	0.208731
AC205362.4_FGP002	0.153694	0.14986	0.177342	0.169538	0.180595	0.168387	0.171381	0.162537
GRMZM2G137352_P01	0.149875	0.197818	0.143896	0.164776	0.168343	0.184972	0.167331	0.156321
GRMZM6G798998_P02	0.157273	0.184605	0.163732	0.188936	0.158055	0.158483	0.15911	0.16314
GRMZM2G095211_P01	0.186169	0.199524	0.216649	0.237611	0.192469	0.194371	0.215258	0.224615
GRMZM2G075562_P01	0.196656	0.150135	0.176208	0.158325	0.166491	0.160593	0.156804	0.168123
GRMZM2G147811_P01	0.256527	0.259658	0.243978	0.244861	0.246839	0.246253	0.251076	0.250808
GRMZM5G807734_P01	0.244776	0.211047	0.282179	0.277863	0.215963	0.212238	0.272965	0.28297
GRMZM2G443495_P05	0.167351	0.216758	0.145422	0.208468	0.146077	0.169248	0.135708	0.144301
GRMZM2G052434_P01	0.160368	0.1837	0.160618	0.182441	0.157682	0.165585	0.152558	0.17038
GRMZM2G316030_P01	0.39544	0.420017	0.417019	0.428759	0.428378	0.422985	0.413534	0.407201
GRMZM5G840699_P01	0.203019	0.209975	0.219056	0.239137	0.177722	0.187535	0.216487	0.213734
GRMZM2G047456_P04	0.288928	0.286552	0.233917	0.250474	0.222308	0.237789	0.222286	0.257745
GRMZM2G367638_P01	0.18696	0.177861	0.230012	0.212229	0.196179	0.188528	0.240624	0.234273
GRMZM2G111511_P02	0.16781	0.163971	0.168461	0.16576	0.16479	0.177538	0.163509	0.161494
GRMZM2G005562_P03	0.184416	0.199613	0.136624	0.152502	0.168326	0.183645	0.153635	0.154573
GRMZM2G169825_P01	0.198388	0.216327	0.186143	0.221097	0.213568	0.212635	0.216099	0.202409
GRMZM2G166994_P01	0.167064	0.179662	0.151448	0.150958	0.162038	0.161655	0.196439	0.164068
GRMZM2G078024_P01	0.205792	0.186549	0.225192	0.224202	0.19831	0.204352	0.214149	0.208122
GRMZM2G131482_P02	0.355386	0.334458	0.354076	0.333319	0.335745	0.313894	0.30255	0.33724
GRMZM2G414813_P02	0.239709	0.220424	0.211462	0.205546	0.201956	0.198209	0.197085	0.192276
GRMZM2G042398_P01	0.250588	0.255957	0.243478	0.269959	0.234396	0.231415	0.256652	0.257555
GRMZM2G036720_P01	0.293395	0.276342	0.314942	0.290832	0.280492	0.276751	0.299844	0.300735
GRMZM2G315401_P01	0.244769	0.20274	0.226566	0.192814	0.215745	0.214798	0.185871	0.183363
GRMZM2G130959_P02	0.154828	0.152631	0.165219	0.162842	0.178021	0.166546	0.178505	0.174741
GRMZM2G117963_P01	0.148272	0.154941	0.176635	0.185498	0.1559	0.155879	0.181936	0.174272
GRMZM2G160842_P02	0.267235	0.280522	0.30408	0.297401	0.281616	0.275608	0.319675	0.307196
GRMZM2G041818_P01	0.204691	0.198628	0.21804	0.204885	0.215592	0.198451	0.218779	0.207601
GRMZM2G149060_P01	0.166636	0.179421	0.153015	0.184347	0.158374	0.171775	0.153919	0.165847
GRMZM2G021706_P01	0.241168	0.217526	0.325134	0.305952	0.219743	0.210283	0.24572	0.234474
GRMZM2G039889_P05	0.2015	0.210206	0.208748	0.195597	0.208399	0.214422	0.213317	0.214478
GRMZM2G078638_P01	0.242	0.259953	0.260119	0.267507	0.230709	0.241611	0.244451	0.253649
GRMZM2G166692_P01	0.253077	0.196809	0.292313	0.220139	0.263693	0.225915	0.290836	0.257218
GRMZM2G127117_P02	0.208877	0.192332	0.227104	0.223229	0.199833	0.201394	0.193678	0.220219
GRMZM2G139712_P01	0.287969	0.297344	0.275294	0.286041	0.304883	0.297784	0.290478	0.29354
GRMZM2G090559_P01	0.243477	0.259868	0.254312	0.255051	0.239823	0.250286	0.246029	0.251154
GRMZM2G330772_P02	0.285174	0.363974	0.288869	0.412653	0.292707	0.36524	0.35083	0.30722
GRMZM2G004006_P02	0.193165	0.19262	0.204183	0.185	0.25487	0.229427	0.214242	0.193159
GRMZM2G103599_P01	0.197435	0.233709	0.183822	0.217973	0.205068	0.221115	0.205157	0.202387
GRMZM2G043119_P01	0.200817	0.224615	0.186145	0.225384	0.2033	0.21427	0.204977	0.207158
GRMZM2G045944_P01	0.336033	0.338716	0.33616	0.334747	0.322345	0.32476	0.334255	0.339652
GRMZM2G145175_P02	0.267588	0.361035	0.296956	0.407415	0.297995	0.322284	0.389094	0.3243
GRMZM2G161212_P01	0.438765	0.493985	0.466174	0.460288	0.440809	0.473301	0.434898	0.458446
GRMZM2G085827_P01	0.18168	0.152373	0.170667	0.168721	0.164705	0.171626	0.160371	0.16319
GRMZM2G109814_P01	0.535304	0.562307	0.399643	0.388495	0.536001	0.496334	0.387065	0.361517
GRMZM2G326707_P01	0.460507	0.40808	0.320233	0.304996	0.437546	0.335151	0.360572	0.372915
GRMZM2G701058_P01	0.235756	0.271181	0.238555	0.273232	0.21596	0.255172	0.255777	0.254367
GRMZM2G092190_P01	0.142246	0.14895	0.169675	0.213001	0.147315	0.145127	0.184129	0.182891
GRMZM2G112530_P01	0.154721	0.190507	0.18044	0.224682	0.129599	0.137576	0.155986	0.15982
GRMZM2G074267_P01	0.159155	0.20104	0.150204	0.208811	0.136807	0.16602	0.143116	0.16818
GRMZM2G333833_P01	0.159997	0.174785	0.156127	0.187701	0.15442	0.167405	0.157053	0.175845
GRMZM2G003979_P01	0.195134	0.197943	0.223069	0.222695	0.198973	0.207565	0.200809	0.220481
GRMZM2G028413_P01	0.188873	0.198972	0.222046	0.266945	0.184843	0.183158	0.208588	0.213241
GRMZM5G871861_P04	0.16699	0.167881	0.162927	0.188971	0.156962	0.167663	0.159795	0.162144
GRMZM2G355523_P01	0.159709	0.15419	0.179968	0.163252	0.166106	0.173214	0.168745	0.168148
GRMZM2G392798_P01	0.197944	0.224722	0.219426	0.227108	0.184344	0.211227	0.196519	0.205376
GRMZM2G105755_P02	0.173255	0.146977	0.178672	0.164576	0.169388	0.157825	0.177323	0.165317
GRMZM2G108087_P01	0.170237	0.219388	0.200717	0.259879	0.171516	0.200644	0.229312	0.214974
GRMZM2G008425_P01	0.171328	0.152792	0.181814	0.162654	0.165358	0.143582	0.175483	0.180322
GRMZM2G426229_P01	0.257386	0.25116	0.288055	0.239625	0.22943	0.242036	0.233206	0.259101
GRMZM2G009994_P02	0.386518	0.409072	0.358024	0.392477	0.364253	0.36484	0.350518	0.374298
GRMZM2G022506_P01	0.161475	0.182253	0.165937	0.165585	0.157932	0.160417	0.168376	0.171358
GRMZM2G311969_P02	0.164391	0.157707	0.170125	0.172044	0.161868	0.169491	0.16732	0.170388
GRMZM2G140156_P01	0.2041	0.208239	0.216536	0.220205	0.199946	0.188232	0.216739	0.212671
GRMZM2G048435_P02	0.217308	0.209906	0.205884	0.202962	0.215258	0.202002	0.200302	0.213045
GRMZM2G104843_P01	0.266929	0.303178	0.223831	0.236205	0.254494	0.260661	0.22788	0.226823
GRMZM2G320023_P01	0.256691	0.248988	0.279597	0.269913	0.210137	0.221097	0.251706	0.261869
GRMZM5G868062_P04	0.162918	0.23483	0.189831	0.279734	0.176026	0.199828	0.225009	0.19849
GRMZM2G088793_P01	0.28503	0.298774	0.284802	0.310143	0.286011	0.282902	0.27342	0.31225
GRMZM2G074138_P02	0.205953	0.214441	0.187573	0.228417	0.216031	0.187286	0.21272	0.214246
GRMZM2G114692_P01	0.254232	0.278988	0.261686	0.280859	0.245503	0.218937	0.218189	0.241606
GRMZM2G003814_P01	0.196984	0.206624	0.223439	0.218318	0.19487	0.203331	0.210969	0.212132
GRMZM2G077212_P01	0.234063	0.254587	0.158877	0.178259	0.227555	0.245162	0.180504	0.18766
GRMZM2G004475_P02	0.213356	0.235085	0.181008	0.200464	0.216168	0.243556	0.182082	0.194948
GRMZM2G002756_P01	0.214016	0.184737	0.20971	0.193542	0.22955	0.216187	0.220005	0.198919
GRMZM2G333659_P01	0.164512	0.173024	0.168067	0.178181	0.152864	0.165917	0.160595	0.170174
GRMZM2G069911_P01	0.191027	0.122215	0.22414	0.141118	0.280361	0.147471	0.33294	0.227394
GRMZM2G057369_P01	0.156267	0.167367	0.184427	0.18465	0.151835	0.159446	0.161461	0.167879
GRMZM2G159720_P01	0.343959	0.314371	0.338579	0.354058	0.325964	0.328832	0.332977	0.327926
GRMZM2G013318_P01	0.15899	0.165219	0.167511	0.203335	0.150668	0.140299	0.17439	0.172921
GRMZM2G074956_P01	0.219862	0.206174	0.212658	0.204953	0.18554	0.199895	0.214656	0.222928
GRMZM2G026391_P02	0.196285	0.189781	0.215016	0.211841	0.20024	0.192698	0.239416	0.22139
GRMZM2G081350_P01	0.256064	0.242437	0.261558	0.245575	0.23512	0.23642	0.259617	0.263209
GRMZM2G003057_P06	0.160677	0.161604	0.160949	0.171187	0.165178	0.174867	0.173723	0.165148
GRMZM2G098667_P03	0.146523	0.159302	0.168836	0.178136	0.152959	0.157674	0.186705	0.183198
GRMZM2G050089_P02	0.169455	0.181984	0.158453	0.181195	0.150742	0.159065	0.17033	0.162108
GRMZM2G109720_P01	0.150143	0.152041	0.184907	0.190103	0.153893	0.158387	0.16962	0.17424
GRMZM2G141185_P02	0.207802	0.198992	0.186126	0.213643	0.207748	0.206974	0.225918	0.219464
GRMZM2G145473_P01	0.175112	0.16619	0.175088	0.158704	0.174074	0.180397	0.139475	0.164294
GRMZM2G377487_P01	0.274594	0.30381	0.313102	0.384322	0.224683	0.274405	0.290025	0.268392
GRMZM2G150631_P02	0.15615	0.147566	0.16652	0.177301	0.160555	0.155789	0.185954	0.1835
GRMZM2G110145_P01	0.597958	0.723848	0.62791	0.81723	0.513228	0.54121	0.597338	0.581279
GRMZM2G142249_P01	0.156965	0.158763	0.164518	0.175473	0.166409	0.170169	0.156973	0.184063
GRMZM2G180863_P01	0.169641	0.156409	0.164221	0.165741	0.153855	0.171067	0.178292	0.174106
GRMZM2G475257_P03	0.32738	0.30136	0.250015	0.252791	0.360012	0.332825	0.267996	0.240956
GRMZM2G065171_P01	0.148674	0.167268	0.168527	0.198024	0.144555	0.153762	0.174351	0.178172
GRMZM2G450488_P01	0.179542	0.174288	0.229286	0.245057	0.178892	0.187131	0.230834	0.241637
GRMZM2G085022_P01	0.222549	0.213258	0.167596	0.195822	0.245835	0.227163	0.204459	0.189984
GRMZM2G130127_P01	0.251842	0.271006	0.247979	0.265518	0.226821	0.238307	0.245193	0.253334
GRMZM2G007080_P01	0.16065	0.176991	0.169836	0.183352	0.14802	0.162618	0.162432	0.169434
GRMZM2G060464_P02	0.141976	0.178274	0.169612	0.193829	0.151581	0.156069	0.167841	0.174152
GRMZM2G038967_P01	0.211129	0.199264	0.200386	0.19943	0.221922	0.206677	0.219451	0.208407
GRMZM2G000753_P01	0.191599	0.193684	0.221893	0.225474	0.201508	0.203657	0.215055	0.213798
GRMZM2G359735_P01	0.454504	0.504221	0.514548	0.569238	0.473457	0.457357	0.483091	0.543584
GRMZM5G837822_P01	0.310425	0.272735	0.124833	0.129888	0.286487	0.276093	0.135852	0.130353
AC208327.4_FGP003	0.195019	0.226538	0.187447	0.228277	0.195742	0.212859	0.197794	0.22299
GRMZM5G860235_P01	0.201014	0.209241	0.212789	0.221338	0.204278	0.197064	0.211252	0.209691
GRMZM2G102903_P02	0.214988	0.28972	0.226209	0.287054	0.228021	0.24979	0.258606	0.245613
GRMZM5G858417_P01	0.219643	0.212141	0.21004	0.210215	0.196156	0.19901	0.206942	0.21252
GRMZM2G087712_P01	0.159351	0.148299	0.182725	0.188982	0.158954	0.146796	0.175408	0.172819
GRMZM2G176225_P01	0.13992	0.154683	0.167742	0.200866	0.155192	0.162989	0.178003	0.173939
GRMZM2G019084_P01	0.172133	0.170195	0.161526	0.170852	0.168185	0.146913	0.165275	0.178254
GRMZM6G923769_P01	0.264156	0.280735	0.289697	0.341088	0.256095	0.281743	0.306654	0.313165
GRMZM2G036697_P01	0.383685	0.36565	0.321609	0.315253	0.344926	0.312599	0.320073	0.30287
GRMZM2G330650_P01	0.174638	0.202442	0.20098	0.233704	0.203823	0.209861	0.23155	0.209668
GRMZM2G075551_P03	0.2575	0.251775	0.274606	0.270442	0.237247	0.252812	0.213995	0.241624
GRMZM2G118362_P01	0.128452	0.184803	0.144946	0.20752	0.135627	0.178358	0.16938	0.184247
GRMZM2G072065_P01	0.161231	0.179539	0.153539	0.178692	0.153074	0.174356	0.153872	0.179031
GRMZM2G060856_P01	0.17366	0.162267	0.169275	0.17824	0.159257	0.144266	0.172653	0.173714
GRMZM2G110572_P02	0.302929	0.276661	0.293763	0.274572	0.305117	0.27653	0.300163	0.303599
GRMZM2G005444_P01	0.306144	0.286647	0.297125	0.316233	0.270575	0.257223	0.29119	0.308197
GRMZM2G132519_P01	0.146639	0.162548	0.165632	0.198538	0.160434	0.144966	0.166819	0.187757
GRMZM2G137707_P01	0.243911	0.280328	0.221218	0.276309	0.237561	0.243941	0.243335	0.253397
GRMZM2G180458_P01	0.16107	0.150873	0.174909	0.156014	0.17227	0.158116	0.183496	0.176586
GRMZM2G456473_P01	0.177682	0.166578	0.171386	0.171392	0.162205	0.161193	0.162543	0.160355
GRMZM2G703303_P02	0.157067	0.162303	0.154717	0.167083	0.173753	0.174901	0.171583	0.171926
GRMZM2G375904_P01	0.166499	0.16141	0.162636	0.157172	0.17309	0.169007	0.175146	0.168373
GRMZM2G046186_P01	0.149589	0.15653	0.189371	0.178721	0.136917	0.149835	0.184432	0.18794
GRMZM2G088919_P01	0.121341	0.117208	0.199936	0.23659	0.126027	0.132998	0.202229	0.197004
GRMZM2G173416_P02	0.140823	0.148867	0.152062	0.157102	0.169734	0.171459	0.203127	0.190159
GRMZM2G133943_P01	0.159023	0.181646	0.156729	0.177268	0.163453	0.137403	0.176735	0.181077
GRMZM2G085438_P01	0.162129	0.169915	0.148543	0.161253	0.168555	0.175066	0.17237	0.175503
GRMZM2G379021_P02	0.259853	0.234102	0.255631	0.237324	0.257445	0.244087	0.26138	0.250176
GRMZM6G175135_P02	0.32257	0.304534	0.32523	0.289809	0.373592	0.343077	0.3586	0.349255
GRMZM2G081221_P01	0.190945	0.206492	0.163546	0.163302	0.163687	0.162209	0.134095	0.149057
GRMZM2G066636_P01	0.131634	0.124519	0.204733	0.198258	0.142794	0.139347	0.199558	0.192491
GRMZM2G036169_P01	0.174784	0.166504	0.170564	0.180429	0.142748	0.153333	0.171159	0.173813
GRMZM2G547542_P01	0.218589	0.223734	0.209804	0.214787	0.199797	0.200554	0.192693	0.20671
GRMZM2G003992_P01	0.277636	0.290993	0.267919	0.297054	0.316115	0.281848	0.300715	0.301052
GRMZM2G048883_P01	0.157231	0.180695	0.142119	0.166484	0.148149	0.178361	0.183818	0.176477
GRMZM2G356423_P01	0.241753	0.253659	0.24835	0.259018	0.24717	0.249069	0.247919	0.253062
GRMZM2G443881_P01	0.150071	0.160183	0.154421	0.191719	0.15497	0.173219	0.16963	0.179121
GRMZM2G006790_P02	0.150655	0.181691	0.147204	0.183289	0.152021	0.176928	0.186268	0.155276
GRMZM2G149843_P02	0.155638	0.17111	0.164636	0.17337	0.155283	0.165266	0.179077	0.168953
GRMZM2G114098_P01	0.208254	0.217239	0.20495	0.215624	0.203409	0.207535	0.207109	0.202546
GRMZM2G116840_P04	0.238703	0.255462	0.248675	0.253727	0.231691	0.245004	0.275061	0.251676
GRMZM2G173563_P01	0.208099	0.211795	0.199639	0.22753	0.202494	0.190942	0.211121	0.215047
GRMZM2G058289_P01	0.217958	0.208817	0.176045	0.205108	0.196573	0.206228	0.199565	0.256371
GRMZM2G167463_P01	0.201445	0.210035	0.220468	0.229636	0.192033	0.194837	0.193613	0.2246
GRMZM2G043127_P01	0.145495	0.170244	0.138883	0.201666	0.14511	0.164218	0.188969	0.178748
GRMZM2G106056_P02	0.167655	0.187048	0.160191	0.163702	0.148485	0.178663	0.145746	0.181843
GRMZM2G025480_P01	0.207596	0.22785	0.179788	0.224774	0.201583	0.228612	0.205229	0.191235
GRMZM2G405581_P02	0.356054	0.380423	0.363178	0.355932	0.271817	0.303892	0.309538	0.325832
AC203366.4_FGP001	0.205452	0.205561	0.212976	0.209759	0.196908	0.212846	0.209898	0.213268
GRMZM2G026417_P01	0.199856	0.201752	0.203396	0.205823	0.207629	0.214061	0.212356	0.221793
AC233888.1_FGP002	0.163293	0.176294	0.175077	0.177632	0.152484	0.161713	0.155212	0.171628
GRMZM2G371313_P01	0.252246	0.23461	0.284886	0.244935	0.244549	0.241626	0.262906	0.234242
GRMZM2G057674_P02	0.240393	0.224723	0.180997	0.190187	0.238538	0.145727	0.212372	0.233729
GRMZM2G068639_P01	0.314601	0.294181	0.360972	0.319	0.331393	0.307533	0.366056	0.372931
GRMZM2G014366_P02	0.233158	0.237684	0.245624	0.306603	0.209984	0.213583	0.268722	0.284641
GRMZM2G099542_P02	0.160141	0.16433	0.15917	0.170976	0.168699	0.161787	0.170824	0.177406
GRMZM2G053083_P01	0.157837	0.158565	0.16741	0.201886	0.139364	0.15435	0.172396	0.181527
GRMZM2G172581_P02	0.215363	0.208348	0.205138	0.216722	0.198711	0.206194	0.210615	0.205576
GRMZM2G036916_P01	0.280921	0.29358	0.314319	0.311353	0.246397	0.259513	0.311366	0.315886
GRMZM2G374475_P02	0.292835	0.261877	0.304611	0.300682	0.280399	0.283599	0.293353	0.315976
GRMZM2G107984_P02	0.230313	0.228963	0.239093	0.250489	0.243381	0.231608	0.287076	0.289077
GRMZM2G019744_P01	0.181332	0.210139	0.202558	0.246094	0.194939	0.200562	0.219246	0.211797
GRMZM2G030312_P01	0.142312	0.172001	0.168068	0.194562	0.152288	0.173037	0.161549	0.169517
GRMZM5G868647_P01	0.324123	0.325622	0.334573	0.360106	0.295607	0.31052	0.352527	0.363589
GRMZM2G116638_P01	0.183358	0.19855	0.220068	0.221352	0.187852	0.185508	0.228633	0.241346
GRMZM2G542497_P01	0.15138	0.144264	0.185291	0.196217	0.143777	0.153809	0.172478	0.186117
GRMZM2G320521_P01	0.132957	0.186721	0.175473	0.229109	0.124035	0.147649	0.161765	0.175626
GRMZM2G025242_P01	0.22554	0.232981	0.253092	0.304017	0.211215	0.236947	0.261943	0.274265
GRMZM2G177263_P02	0.213035	0.222652	0.275274	0.254416	0.236148	0.240897	0.273619	0.28396
GRMZM2G004768_P01	0.327841	0.458467	0.217664	0.235296	0.338221	0.648809	0.223782	0.216587
GRMZM2G090595_P01	0.280468	0.210285	0.281426	0.215911	0.276813	0.210342	0.266147	0.258608
GRMZM2G150697_P01	0.165937	0.220379	0.221659	0.28132	0.158121	0.164404	0.218439	0.236408
GRMZM2G360626_P01	0.16078	0.162427	0.172557	0.152239	0.17042	0.152761	0.178306	0.183843
GRMZM2G017831_P01	0.170945	0.174793	0.175503	0.173156	0.16962	0.145138	0.151249	0.172929
GRMZM2G553532_P01	0.19627	0.175479	0.199851	0.203144	0.210472	0.228805	0.219942	0.232704
GRMZM2G479744_P01	0.160594	0.165691	0.168916	0.177543	0.146171	0.155524	0.176189	0.182705
GRMZM2G176737_P01	0.265978	0.250746	0.254708	0.257148	0.229542	0.240401	0.244334	0.257143
GRMZM2G332522_P02	0.148513	0.182519	0.143232	0.17133	0.149546	0.156627	0.194766	0.186799
GRMZM2G050501_P01	0.158037	0.20805	0.211646	0.285348	0.16329	0.182476	0.214477	0.243344
GRMZM2G055699_P01	0.26339	0.240378	0.326799	0.314886	0.261208	0.253921	0.32878	0.34397
GRMZM5G884137_P01	0.244195	0.215576	0.268312	0.256268	0.224709	0.220422	0.322353	0.248165
GRMZM2G147854_P01	0.154951	0.17718	0.160115	0.183976	0.14771	0.161529	0.163937	0.183935
GRMZM5G868047_P01	0.209962	0.223553	0.272729	0.304928	0.214386	0.218125	0.281323	0.274995
GRMZM2G097021_P01	0.129445	0.176471	0.165453	0.166479	0.160631	0.182305	0.166518	0.186032
GRMZM2G326663_P01	0.202392	0.188527	0.140757	0.15298	0.170191	0.17743	0.144036	0.157021
AC235543.1_FGP003	0.168534	0.144045	0.1863	0.159669	0.182174	0.158342	0.163924	0.170345
GRMZM2G135722_P01	0.352781	0.31761	0.185832	0.2025	0.326709	0.246467	0.190299	0.177802
GRMZM2G337819_P01	0.195944	0.176801	0.210625	0.22552	0.209548	0.183384	0.213454	0.251391
GRMZM2G103079_P01	0.267468	0.256825	0.265796	0.24274	0.241653	0.222463	0.239951	0.263104
GRMZM2G020523_P01	0.341739	0.313474	0.183165	0.167392	0.31092	0.301385	0.193549	0.188375
GRMZM2G176647_P01	0.271898	0.303951	0.341574	0.428137	0.287558	0.322003	0.333698	0.377848
GRMZM2G043154_P01	0.362209	0.362545	0.365024	0.36294	0.365117	0.329739	0.418066	0.43436
GRMZM2G475059_P01	0.14209	0.142174	0.143334	0.157671	0.144507	0.124991	0.258886	0.219679
GRMZM2G093101_P01	0.359115	0.336247	0.178126	0.180754	0.287305	0.312023	0.176608	0.169822
GRMZM2G068294_P01	0.180251	0.176177	0.256463	0.274374	0.159137	0.165503	0.22252	0.232242
GRMZM2G096303_P01	0.364596	0.434304	0.196131	0.212491	0.370066	0.37289	0.196058	0.186797
GRMZM2G057557_P01	0.195495	0.191223	0.206581	0.201665	0.198427	0.19882	0.232284	0.242173
GRMZM2G115504_P01	0.206559	0.200778	0.209047	0.237876	0.200846	0.189252	0.204634	0.217674
GRMZM2G125032_P01	0.261057	0.316676	0.202544	0.269333	0.206334	0.189161	0.241607	0.313288
GRMZM2G003068_P01	0.186358	0.185011	0.225671	0.226407	0.181245	0.201293	0.206488	0.254195
GRMZM2G156296_P01	0.150583	0.164995	0.16116	0.16157	0.163564	0.161582	0.17574	0.19414
GRMZM2G353276_P01	0.234238	0.178568	0.245672	0.220428	0.292549	0.20277	0.299252	0.326525
GRMZM2G022645_P01	0.195995	0.185162	0.230893	0.200387	0.185199	0.17994	0.243207	0.245884
GRMZM2G143457_P01	0.200001	0.172738	0.138227	0.132328	0.132707	0.1431	0.198901	0.215331
GRMZM2G362848_P01	0.339333	0.332133	0.197024	0.192563	0.310024	0.296473	0.175745	0.156705
GRMZM2G032856_P01	0.37452	0.378958	0.196149	0.181228	0.433999	0.389603	0.195672	0.183207
GRMZM2G014395_P01	0.267156	0.263873	0.286603	0.272402	0.275368	0.260208	0.357453	0.35027
GRMZM2G337242_P01	0.355694	0.248229	0.185964	0.166364	0.377963	0.313633	0.180677	0.171477
GRMZM2G022782_P01	0.255238	0.251447	0.29365	0.34383	0.250191	0.271687	0.312791	0.354501
GRMZM2G007385_P01	0.224964	0.227348	0.24161	0.270717	0.257009	0.230746	0.264683	0.282922
GRMZM2G144362_P06	0.239227	0.229577	0.257092	0.266798	0.216639	0.236155	0.271262	0.283249
GRMZM2G152179_P01	0.15809	0.150807	0.151058	0.13913	0.149398	0.160177	0.208298	0.216377
GRMZM2G018716_P01	0.466181	0.35665	0.291138	0.267486	0.698318	0.361722	0.295259	0.263246
GRMZM2G038374_P01	0.171936	0.162802	0.161707	0.170553	0.166447	0.154277	0.164713	0.180899
GRMZM2G068158_P01	0.355035	0.486636	0.224593	0.264374	0.253559	0.297934	0.2142	0.237002
GRMZM2G044908_P01	0.109128	0.124372	0.217854	0.226223	0.120934	0.124189	0.204608	0.206025
GRMZM5G862325_P01	0.0992987	0.122883	0.230152	0.247588	0.114789	0.1086	0.192087	0.217936
GRMZM2G122431_P01	0.258579	0.234313	0.311104	0.26193	0.276831	0.258392	0.36083	0.371356
GRMZM2G039385_P04	0.265081	0.287547	0.288286	0.279527	0.293657	0.287079	0.306766	0.325391
GRMZM2G055802_P01	0.279248	0.33866	0.123215	0.131968	0.249881	0.293179	0.111623	0.138892
GRMZM6G157558_P01	0.35866	0.402394	0.217665	0.244313	0.321869	0.326638	0.235201	0.226593
GRMZM2G027198_P01	0.144607	0.166223	0.145631	0.152167	0.15391	0.163879	0.204098	0.20282
GRMZM2G142063_P01	0.261395	0.25631	0.150691	0.155541	0.264729	0.266179	0.156913	0.15491
GRMZM2G056335_P01	0.120525	0.13761	0.180131	0.165863	0.141609	0.143293	0.226325	0.217979
GRMZM2G403007_P01	0.134092	0.17049	0.198663	0.290061	0.0822804	0.143259	0.115955	0.198533
GRMZM5G838433_P01	0.351334	0.313966	0.148052	0.155765	0.19336	0.214382	0.141292	0.148516
GRMZM2G326116_P01	0.0989424	0.0971676	0.235102	0.234937	0.0958476	0.106339	0.23749	0.227507
AC233872.1_FGP003	0.384361	0.409568	0.271374	0.280167	0.364385	0.391224	0.288134	0.277454
GRMZM2G122892_P01	0.246165	0.254731	0.172429	0.177262	0.235541	0.247957	0.169474	0.163107
GRMZM2G157588_P01	0.426168	0.461229	0.328922	0.321801	0.394784	0.441377	0.30424	0.32148
GRMZM2G128454_P01	0.561636	0.575688	0.233235	0.185505	0.61383	0.603634	0.335883	0.223923
GRMZM2G064437_P01	0.368033	0.544246	0.277113	0.302967	0.289735	0.297994	0.274355	0.312225
GRMZM2G361064_P01	0.281116	0.20385	0.203365	0.183364	0.230816	0.214819	0.17423	0.175107
GRMZM2G095147_P02	0.239611	0.276213	0.295295	0.321561	0.25374	0.411117	0.288284	0.247513
GRMZM2G142918_P02	0.414926	0.426185	0.263316	0.265649	0.26726	0.245278	0.22017	0.230548
GRMZM2G175453_P01	0.191651	0.175484	0.162429	0.14063	0.177669	0.20515	0.154426	0.125895
GRMZM2G098545_P01	0.228915	0.198429	0.165303	0.177607	0.273969	0.262306	0.201955	0.158183
GRMZM2G445958_P01	0.350477	0.443147	0.311517	0.379251	0.297759	0.356817	0.253495	0.274204
GRMZM2G148090_P02	0.383594	0.284433	0.246305	0.215644	0.341622	0.313055	0.299951	0.24873
GRMZM2G117763_P01	0.294081	0.332547	0.246602	0.2961	0.300522	0.30749	0.289595	0.266397
GRMZM2G459811_P01	0.329976	0.351382	0.349743	0.29552	0.328156	0.434609	0.293871	0.283411
GRMZM2G103668_P01	1.03422	0.568661	0.271852	0.2361	1.74609	0.622212	0.282168	0.238694
GRMZM2G132169_P02	0.344774	0.381138	0.302031	0.311267	0.269427	0.2598	0.208808	0.256089
GRMZM2G038281_P02	0.443659	0.331478	0.22367	0.212411	0.370643	0.347424	0.197122	0.206925
GRMZM2G119657_P01	0.165464	0.185609	0.175019	0.170536	0.157173	0.163385	0.161696	0.154453
GRMZM2G117771_P01	0.269914	0.325021	0.25864	0.306415	0.299909	0.306063	0.302046	0.265326
GRMZM2G178517_P04	0.184005	0.166888	0.137449	0.143017	0.2092	0.200069	0.146882	0.145823
GRMZM2G344634_P01	0.383751	0.4892	0.418619	0.418974	0.413335	0.416931	0.455429	0.337095
GRMZM2G135949_P01	0.153294	0.155137	0.136507	0.146257	0.230114	0.203289	0.159363	0.149372
GRMZM2G085661_P01	0.208812	0.340033	0.152452	0.222322	0.203988	0.208303	0.16221	0.168546
GRMZM2G163407_P02	0.326049	0.3341	0.266789	0.283189	0.326443	0.304259	0.260183	0.232323
GRMZM2G035401_P01	0.351102	0.296704	0.276728	0.250535	0.329858	0.312123	0.273771	0.242513
GRMZM2G152135_P07	0.303583	0.303576	0.299322	0.335057	0.276127	0.292297	0.276341	0.247031
GRMZM2G047800_P01	0.184499	0.208281	0.155606	0.147499	0.18154	0.190166	0.131253	0.134489
GRMZM2G064804_P02	0.383738	0.464379	0.276319	0.297945	0.347026	0.365614	0.245512	0.286133
GRMZM2G066860_P03	0.271009	0.390784	0.278477	0.362745	0.249928	0.296142	0.23354	0.250708
GRMZM2G075140_P01	0.157832	0.31184	0.193406	0.35154	0.143251	0.178178	0.159052	0.171568
GRMZM2G030341_P01	0.255799	0.292557	0.233992	0.246867	0.257391	0.261755	0.224022	0.227617
GRMZM5G820727_P06	0.257217	0.279388	0.207597	0.270943	0.25286	0.271031	0.23942	0.221545
GRMZM5G813259_P01	0.217285	0.217362	0.199645	0.211557	0.218818	0.220091	0.191423	0.190485
GRMZM2G135586_P01	0.225227	0.23158	0.198413	0.191301	0.218896	0.240073	0.169639	0.191536
GRMZM2G105400_P01	0.570177	0.58888	0.415936	0.417406	0.547223	0.612193	0.420463	0.427722
GRMZM2G074517_P01	0.235301	0.223527	0.199321	0.208553	0.218084	0.215264	0.185367	0.181249
GRMZM2G010801_P02	0.289459	0.378868	0.263982	0.349287	0.265717	0.304005	0.236791	0.245224
GRMZM2G097854_P01	0.200565	0.190148	0.11601	0.135266	0.216978	0.208735	0.131218	0.134414
GRMZM2G119256_P02	0.323521	0.330092	0.2732	0.29134	0.305646	0.30257	0.252028	0.254936
GRMZM5G810275_P01	0.335609	0.388935	0.43352	0.409579	0.346312	0.375096	0.341166	0.369782
GRMZM2G070038_P01	0.418215	0.443647	0.395191	0.439886	0.401254	0.4159	0.39438	0.424861
GRMZM2G035526_P01	0.279258	0.271189	0.234431	0.234451	0.263561	0.272614	0.215542	0.228954
GRMZM2G396540_P01	0.304051	0.425674	0.257743	0.372032	0.244779	0.282801	0.218664	0.227588
GRMZM2G038536_P01	0.171041	0.167422	0.363277	0.51527	0.181793	0.210609	0.186658	0.203931
GRMZM5G895175_P01	0.329053	0.340593	0.275675	0.292061	0.289632	0.300945	0.2485	0.256875
GRMZM2G058032_P02	0.472837	0.436742	0.353495	0.352498	0.375669	0.366722	0.323011	0.319026
GRMZM2G443728_P02	0.18733	0.182762	0.148523	0.145974	0.188504	0.188973	0.14307	0.148198
GRMZM2G010323_P01	0.261741	0.261583	0.230508	0.271761	0.238066	0.256578	0.242718	0.237045
GRMZM2G175989_P01	0.488203	0.352359	0.420453	0.324591	0.410552	0.324334	0.356517	0.322991
GRMZM2G019446_P01	0.268517	0.253453	0.254008	0.243248	0.262038	0.251099	0.231703	0.235934
GRMZM2G043521_P01	0.231976	0.298823	0.268886	0.334478	0.211201	0.222545	0.22021	0.211881
GRMZM2G178346_P01	0.358678	0.319695	0.295111	0.270365	0.29289	0.286933	0.239358	0.270302
GRMZM2G025528_P01	0.23449	0.20448	0.207626	0.176928	0.219472	0.201827	0.215813	0.206032
GRMZM2G016097_P01	0.154559	0.201735	0.164644	0.20446	0.142776	0.153931	0.152557	0.158671
GRMZM2G028556_P03	0.405268	0.461332	0.171352	0.207654	0.403759	0.331379	0.1799	0.17269
AC209898.2_FGP004	0.264791	0.147072	0.2799	0.155547	0.236926	0.170505	0.244293	0.167634
GRMZM2G165815_P02	0.248394	0.318598	0.285108	0.291509	0.305618	0.313595	0.302867	0.267645
GRMZM2G030173_P01	0.179555	0.216542	0.144578	0.159309	0.177454	0.188951	0.126587	0.140358
GRMZM2G109967_P02	0.310633	0.401349	0.286602	0.36565	0.312953	0.354632	0.330597	0.304251
GRMZM2G350319_P02	0.188594	0.261113	0.166844	0.272835	0.156963	0.216753	0.223708	0.179856
GRMZM2G135691_P01	0.198821	0.232116	0.194591	0.20776	0.213322	0.218381	0.221323	0.180352
GRMZM2G364373_P01	0.398888	0.382231	0.335942	0.361203	0.390268	0.403817	0.364489	0.363162
GRMZM2G439311_P02	0.306951	0.323541	0.277275	0.297759	0.310459	0.295577	0.248294	0.273478
GRMZM2G446895_P01	0.271399	0.320431	0.213254	0.257899	0.257351	0.25774	0.197175	0.224751
GRMZM2G106810_P01	0.231846	0.278177	0.242984	0.286944	0.235015	0.237195	0.245384	0.242454
GRMZM5G828302_P03	0.341732	0.361688	0.262069	0.334324	0.371723	0.343767	0.356022	0.295341
AC208341.4_FGP005	0.260306	0.251455	0.269843	0.234064	0.255889	0.241129	0.237422	0.249891
GRMZM2G025441_P01	0.298812	0.285009	0.209668	0.21703	0.280157	0.260146	0.220149	0.229029
GRMZM2G385989_P01	0.292528	0.353204	0.282181	0.333534	0.253387	0.276037	0.262974	0.279487
GRMZM2G462625_P01	0.264265	0.239799	0.235569	0.243684	0.254238	0.262712	0.23717	0.262563
GRMZM2G079342_P01	0.238407	0.272657	0.195184	0.214011	0.18868	0.208135	0.174429	0.175164
GRMZM2G149115_P01	0.389094	0.477853	0.314326	0.344537	0.411978	0.419134	0.34076	0.302316
GRMZM2G019901_P02	0.381089	0.364925	0.357897	0.355083	0.401308	0.394174	0.376986	0.368538
GRMZM2G115156_P01	0.265458	0.319292	0.254869	0.329939	0.292336	0.30845	0.287226	0.275763
GRMZM2G167243_P01	0.25628	0.243366	0.178995	0.185213	0.22309	0.22792	0.170657	0.181145
GRMZM5G889999_P01	0.27712	0.278384	0.214608	0.228352	0.273346	0.275329	0.231128	0.221733
GRMZM2G068271_P01	0.288414	0.224571	0.263026	0.197976	0.300055	0.234686	0.262641	0.228631
GRMZM2G021567_P01	0.152387	0.198645	0.146019	0.198722	0.149887	0.181448	0.160778	0.145448
GRMZM5G803556_P01	0.357594	0.39996	0.273997	0.41365	0.291248	0.343814	0.293576	0.292828
GRMZM2G369931_P01	0.199304	0.228111	0.192479	0.227754	0.204156	0.210629	0.204026	0.200208
GRMZM2G377311_P01	0.209657	0.195482	0.268586	0.192001	0.184878	0.211314	0.19538	0.209371
GRMZM2G085602_P02	0.277803	0.290338	0.291704	0.313116	0.275856	0.284523	0.320774	0.27922
GRMZM2G171060_P02	0.278756	0.34498	0.27653	0.379536	0.310865	0.340963	0.400015	0.335023
GRMZM2G418415_P01	0.5347	0.494975	0.507671	0.500266	0.525867	0.486332	0.498022	0.452167
GRMZM2G007140_P01	0.259732	0.248762	0.257128	0.24144	0.269743	0.265102	0.234025	0.224069
GRMZM2G119930_P01	0.299305	0.261893	0.270281	0.224487	0.245809	0.229759	0.242601	0.225865
GRMZM2G042347_P01	0.254003	0.238836	0.181369	0.182817	0.214584	0.218923	0.186142	0.189994
AC234171.1_FGP003	0.268609	0.30113	0.297267	0.325127	0.263443	0.270011	0.343791	0.263954
GRMZM2G009948_P01	0.215787	0.241908	0.183475	0.179344	0.237194	0.229716	0.190468	0.188775
GRMZM2G053397_P01	0.176705	0.228421	0.129076	0.169321	0.168305	0.198595	0.128555	0.134355
GRMZM2G143494_P01	0.404015	0.345167	0.406483	0.361734	0.444205	0.330244	0.345994	0.362159
GRMZM2G052422_P01	0.441747	0.490459	0.423908	0.420279	0.400563	0.378583	0.377837	0.399957
GRMZM6G768049_P01	0.240176	0.267557	0.25441	0.26264	0.251167	0.240886	0.244906	0.238259
GRMZM2G161809_P01	0.2134	0.22558	0.208577	0.218068	0.229199	0.192923	0.189687	0.189233
GRMZM2G038217_P01	0.420706	0.351522	0.275717	0.26905	0.375714	0.365175	0.307168	0.301614
GRMZM2G105855_P01	0.169515	0.203971	0.154966	0.17529	0.159028	0.176488	0.147525	0.14655
GRMZM2G437859_P02	0.225835	0.242034	0.19118	0.24105	0.1914	0.187814	0.188948	0.198407
GRMZM2G357595_P01	0.190895	0.206266	0.203841	0.230598	0.203531	0.208519	0.220286	0.20273
GRMZM2G028902_P01	0.239853	0.261807	0.262106	0.308542	0.211209	0.231266	0.246699	0.238519
GRMZM2G089461_P01	0.254932	0.271561	0.218124	0.218614	0.283574	0.265851	0.23815	0.249194
GRMZM2G181542_P01	0.176605	0.254797	0.18554	0.265311	0.183866	0.190911	0.228861	0.180776
GRMZM2G050596_P01	0.255891	0.299094	0.297063	0.343344	0.268639	0.272409	0.293527	0.303368
GRMZM2G064600_P01	0.33219	0.375237	0.304544	0.35398	0.33095	0.338217	0.322959	0.308591
GRMZM5G894932_P01	0.272634	0.279178	0.246517	0.248047	0.251928	0.257449	0.223767	0.220481
GRMZM2G113668_P01	0.264182	0.268908	0.254627	0.247523	0.244955	0.268084	0.225457	0.226264
GRMZM5G878379_P01	0.332251	0.355811	0.323136	0.358569	0.307334	0.323311	0.341911	0.324342
GRMZM2G178916_P03	0.248032	0.270128	0.219875	0.265093	0.238852	0.254539	0.252769	0.250711
GRMZM2G383408_P01	0.227064	0.212622	0.224057	0.190034	0.210563	0.183105	0.226452	0.19277
GRMZM6G732597_P01	0.235597	0.21062	0.195176	0.174803	0.231715	0.228543	0.203707	0.186506
GRMZM2G167428_P01	0.211917	0.188585	0.203654	0.177239	0.24926	0.227386	0.210837	0.19779
GRMZM2G083195_P01	0.420736	0.402034	0.291174	0.346536	0.47498	0.422838	0.319638	0.322064
GRMZM2G473533_P01	0.456523	0.468851	0.376306	0.407483	0.431427	0.435545	0.370747	0.386452
GRMZM2G059965_P01	0.276508	0.381841	0.284038	0.358797	0.307749	0.369381	0.370688	0.317664
GRMZM2G070881_P01	0.236073	0.263096	0.216499	0.236767	0.283645	0.270533	0.250483	0.242905
GRMZM2G074053_P01	0.258487	0.24646	0.197622	0.198464	0.177113	0.212222	0.183097	0.193202
GRMZM2G021864_P01	0.275403	0.271039	0.235906	0.245545	0.259907	0.26572	0.222249	0.224231
GRMZM2G096491_P01	0.435213	0.49493	0.48741	0.476179	0.439011	0.461065	0.429419	0.443439
GRMZM2G134426_P01	0.269229	0.289017	0.308588	0.323275	0.292956	0.282046	0.268378	0.299844
GRMZM2G080524_P01	0.354787	0.42485	0.359744	0.445848	0.327205	0.366329	0.36075	0.360487
GRMZM2G008751_P01	0.291026	0.282881	0.260379	0.290314	0.304864	0.32046	0.289773	0.293636
GRMZM2G174370_P01	0.192506	0.236956	0.18777	0.23693	0.184371	0.211643	0.210508	0.205982
GRMZM2G082019_P01	0.315554	0.340866	0.353876	0.32027	0.331954	0.355024	0.321327	0.327796
GRMZM2G138572_P01	0.225681	0.281574	0.256091	0.272399	0.233687	0.242268	0.275894	0.212406
GRMZM2G073884_P01	0.424332	0.334071	0.257331	0.251094	0.475405	0.294381	0.328057	0.301996
GRMZM2G161658_P01	0.349786	0.380803	0.365443	0.387825	0.362049	0.384122	0.38119	0.388781
GRMZM2G145518_P01	0.331936	0.303742	0.290103	0.262631	0.306362	0.295766	0.268512	0.274282
GRMZM5G868273_P02	0.471915	0.471912	0.500954	0.462445	0.411499	0.442818	0.463959	0.441164
GRMZM2G176407_P01	0.205172	0.205113	0.210341	0.226725	0.195919	0.203023	0.211309	0.209064
GRMZM2G076539_P01	0.344336	0.355715	0.320738	0.349715	0.327052	0.357157	0.281274	0.330679
GRMZM2G371793_P01	0.439461	0.460203	0.283453	0.321301	0.316854	0.389374	0.237261	0.21876
GRMZM2G118037_P01	0.229376	0.257359	0.291699	0.220713	0.246686	0.289456	0.241057	0.223654
GRMZM2G019838_P01	0.251298	0.315343	0.296482	0.355376	0.244418	0.288266	0.303126	0.279022
GRMZM2G139977_P01	0.405304	0.388342	0.353736	0.35485	0.382933	0.358904	0.382404	0.373526
GRMZM2G096352_P01	0.170052	0.196404	0.198033	0.219293	0.222268	0.224609	0.218045	0.217962
GRMZM2G404426_P01	0.437388	0.429391	0.386692	0.397549	0.458434	0.396045	0.41155	0.416285
GRMZM2G146885_P01	0.329821	0.33219	0.362198	0.348964	0.345949	0.31908	0.312751	0.315714
GRMZM5G824843_P01	0.308654	0.29881	0.269204	0.289526	0.311015	0.303289	0.274878	0.277957
GRMZM2G153208_P01	0.603587	0.476973	0.203394	0.278189	0.59327	0.360409	0.228134	0.256045
GRMZM2G151268_P04	0.277403	0.336483	0.331753	0.383819	0.324965	0.356937	0.337539	0.317768
GRMZM2G029933_P01	0.378021	0.472342	0.40169	0.539408	0.363401	0.409573	0.377362	0.391535
GRMZM2G138342_P01	0.26066	0.244059	0.254809	0.251847	0.251995	0.235039	0.25624	0.245351
GRMZM2G032293_P02	0.336179	0.302599	0.306979	0.350004	0.355666	0.33939	0.353448	0.322401
GRMZM2G099745_P01	0.358239	0.377263	0.406943	0.400963	0.33536	0.375717	0.382578	0.362937
GRMZM2G113401_P02	0.300021	0.334937	0.268594	0.286265	0.289693	0.322323	0.263576	0.267923
GRMZM2G023023_P01	0.26978	0.284001	0.315695	0.295659	0.295487	0.264052	0.312606	0.296052
GRMZM2G174708_P01	0.296304	0.268462	0.262434	0.202866	0.261817	0.251032	0.216317	0.240768
GRMZM2G097989_P01	0.268319	0.314463	0.218285	0.265317	0.227155	0.254934	0.21651	0.235017
GRMZM2G171006_P02	0.392617	0.452332	0.40879	0.453683	0.400227	0.420407	0.398076	0.407202
GRMZM5G883601_P01	0.238186	0.265564	0.247627	0.251202	0.26584	0.23395	0.248687	0.248945
GRMZM2G114570_P01	0.52315	0.539405	0.48309	0.530838	0.460934	0.50265	0.467463	0.492469
GRMZM2G071518_P01	0.251321	0.346001	0.26892	0.367859	0.259506	0.269652	0.283669	0.286405
GRMZM2G043948_P01	0.407894	0.453804	0.322145	0.360351	0.369574	0.417355	0.323921	0.344955
GRMZM2G484706_P01	0.319329	0.306362	0.278135	0.262934	0.325138	0.299378	0.272939	0.269118
GRMZM2G017789_P01	0.213733	0.234209	0.195789	0.211613	0.207095	0.222295	0.190546	0.191387
GRMZM5G833124_P01	0.418836	0.401165	0.409083	0.405574	0.443231	0.433631	0.40902	0.412794
GRMZM2G026881_P01	0.160732	0.178492	0.17664	0.189795	0.161166	0.146829	0.157465	0.162215
GRMZM2G179732_P02	0.299589	0.313676	0.271413	0.283246	0.29286	0.299937	0.28288	0.289733
GRMZM2G034225_P01	0.330153	0.357723	0.305089	0.338028	0.340931	0.338163	0.34325	0.31333
GRMZM2G173315_P01	0.435695	0.429922	0.447164	0.428085	0.493766	0.453717	0.511378	0.46694
GRMZM2G392700_P01	0.380081	0.381284	0.400719	0.391718	0.356968	0.356423	0.35563	0.377176
GRMZM2G424241_P03	0.216625	0.223218	0.212249	0.215398	0.179432	0.19365	0.215972	0.210123
GRMZM2G054470_P01	0.217164	0.212443	0.234329	0.220524	0.185716	0.186825	0.20311	0.206555
GRMZM2G452523_P01	0.39362	0.530928	0.367681	0.535313	0.366628	0.38641	0.374136	0.378618
GRMZM2G125294_P01	0.394584	0.412844	0.382583	0.403402	0.404656	0.434992	0.437041	0.463232
GRMZM2G085939_P01	0.16597	0.161764	0.155919	0.159891	0.177301	0.186494	0.16601	0.159985
GRMZM2G024550_P01	0.352378	0.410866	0.342304	0.428277	0.362621	0.368339	0.367193	0.368022
GRMZM2G175272_P01	0.229828	0.28668	0.213966	0.281083	0.236432	0.262901	0.244451	0.24466
GRMZM2G158789_P01	0.224356	0.251355	0.250465	0.276869	0.239056	0.249264	0.254055	0.25458
GRMZM2G006781_P01	0.221066	0.268948	0.248771	0.297218	0.221313	0.225586	0.254906	0.262194
GRMZM2G131321_P01	0.306283	0.370408	0.325064	0.383494	0.306768	0.325188	0.331363	0.3181
GRMZM2G125531_P04	0.225273	0.28502	0.243012	0.278847	0.234723	0.246374	0.237696	0.249056
GRMZM5G837058_P01	0.230642	0.282015	0.220599	0.30785	0.218304	0.24286	0.247692	0.250038
GRMZM2G156251_P01	0.200481	0.204913	0.207806	0.206776	0.200772	0.224403	0.210846	0.210669
GRMZM2G026800_P01	0.532876	0.526154	0.528443	0.497836	0.566918	0.534358	0.58213	0.564618
GRMZM2G136085_P01	0.162501	0.157968	0.157301	0.155063	0.16691	0.179802	0.187211	0.166578
GRMZM2G165422_P01	0.470074	0.506541	0.445912	0.474266	0.473294	0.416257	0.40226	0.478064
GRMZM2G071575_P01	0.293021	0.334363	0.279043	0.34136	0.252217	0.279707	0.274266	0.279356
GRMZM2G439457_P02	0.275635	0.33746	0.244244	0.323703	0.274976	0.304423	0.293843	0.279049
GRMZM5G804358_P02	0.262137	0.255016	0.247742	0.262361	0.240693	0.234783	0.255034	0.242234
GRMZM2G121776_P01	0.390674	0.416493	0.387899	0.428099	0.412881	0.397586	0.448905	0.450796
GRMZM2G126873_P01	0.466143	0.456845	0.416862	0.430934	0.41155	0.37655	0.387961	0.386488
GRMZM2G177532_P02	0.209644	0.206376	0.201497	0.210607	0.206873	0.220102	0.206838	0.20473
GRMZM2G099207_P01	0.463858	0.525506	0.439032	0.524876	0.399125	0.46066	0.428567	0.425043
GRMZM2G017269_P01	0.169333	0.224972	0.196614	0.266927	0.181681	0.202041	0.215867	0.209231
GRMZM2G006085_P01	0.222351	0.264974	0.249185	0.265163	0.23696	0.249822	0.2687	0.242845
GRMZM2G030713_P01	0.261669	0.295306	0.305629	0.340464	0.245917	0.258735	0.305324	0.320289
GRMZM2G087081_P02	0.300329	0.27409	0.252595	0.249024	0.337215	0.324784	0.29934	0.295955
GRMZM2G009655_P01	0.343719	0.348169	0.288709	0.322006	0.364635	0.353213	0.317297	0.328918
GRMZM5G869971_P02	0.298691	0.277486	0.288001	0.287291	0.29542	0.287344	0.298624	0.300475
GRMZM2G074028_P01	0.233806	0.25186	0.309821	0.261272	0.224521	0.255175	0.228467	0.235078
GRMZM2G092123_P02	0.229116	0.236233	0.244853	0.269809	0.236953	0.269997	0.254538	0.258502
GRMZM2G077769_P01	0.192501	0.217213	0.208669	0.230034	0.184192	0.211614	0.21236	0.210083
GRMZM2G098527_P01	0.217192	0.209693	0.194459	0.206995	0.215005	0.218929	0.209145	0.195248
GRMZM2G346133_P01	0.251482	0.241263	0.282438	0.248102	0.254769	0.239711	0.238493	0.243743
GRMZM2G063511_P01	0.327503	0.394065	0.300029	0.414519	0.292244	0.312064	0.304395	0.321848
GRMZM2G040728_P01	0.243037	0.254825	0.256548	0.267839	0.249939	0.230148	0.24998	0.247683
GRMZM2G051374_P07	0.196259	0.210538	0.201676	0.215426	0.194443	0.225339	0.207307	0.215679
GRMZM2G097286_P01	0.140441	0.12803	0.238073	0.225502	0.13079	0.127756	0.16232	0.180422
GRMZM2G115766_P01	0.226345	0.337071	0.276699	0.386519	0.22579	0.268589	0.330139	0.282182
GRMZM2G035073_P01	0.542135	0.492015	0.438018	0.413213	0.624843	0.537134	0.486808	0.465834
GRMZM2G017254_P03	0.247905	0.245864	0.225628	0.247052	0.262355	0.278886	0.236877	0.255432
GRMZM2G052880_P01	0.37182	0.389711	0.363209	0.364156	0.382025	0.394644	0.370591	0.363844
GRMZM2G132442_P03	0.479406	0.53297	0.443919	0.511742	0.507401	0.529802	0.510815	0.483945
GRMZM2G059129_P01	0.37449	0.28466	0.234298	0.214554	0.375377	0.295817	0.280202	0.273935
GRMZM2G123624_P01	0.277257	0.369318	0.282921	0.363814	0.235617	0.277504	0.269181	0.257722
GRMZM2G129405_P01	0.210718	0.214768	0.198425	0.215978	0.204581	0.218036	0.200499	0.203663
GRMZM5G850455_P02	0.211672	0.290829	0.238704	0.34854	0.193702	0.200315	0.259712	0.256526
GRMZM2G146940_P01	0.392284	0.387502	0.364795	0.353232	0.385592	0.377608	0.371598	0.367389
GRMZM2G002879_P04	0.454016	0.51331	0.451474	0.562861	0.407642	0.427544	0.409597	0.440223
GRMZM2G115245_P01	0.148942	0.194884	0.169174	0.192774	0.140523	0.16585	0.163869	0.157317
GRMZM2G106245_P02	0.375809	0.425598	0.37697	0.404274	0.353271	0.365878	0.341972	0.356229
GRMZM2G440968_P01	0.199541	0.24015	0.175553	0.206424	0.213611	0.223779	0.215744	0.191864
GRMZM2G099467_P01	0.320154	0.296446	0.218035	0.237547	0.445044	0.263236	0.282928	0.269944
GRMZM2G064870_P01	0.189651	0.240059	0.187781	0.237322	0.198656	0.206375	0.205955	0.200868
GRMZM2G122810_P05	0.311021	0.351774	0.296438	0.349041	0.233705	0.248593	0.264883	0.277878
GRMZM2G067514_P01	0.376311	0.413299	0.342705	0.394261	0.365307	0.381005	0.358642	0.368469
GRMZM5G883149_P03	0.424267	0.46441	0.496926	0.615702	0.485577	0.451316	0.526685	0.535117
GRMZM2G065839_P01	0.363343	0.389405	0.41152	0.422435	0.335824	0.37522	0.345124	0.357129
GRMZM2G339122_P01	0.338656	0.282667	0.298463	0.296158	0.290758	0.284613	0.265745	0.276274
GRMZM2G073551_P01	0.252145	0.241037	0.247785	0.253524	0.250835	0.245921	0.25589	0.252862
GRMZM2G058057_P01	0.184898	0.244439	0.184017	0.244383	0.181637	0.205559	0.222387	0.199347
GRMZM2G175401_P01	0.300099	0.190207	0.35447	0.19863	0.240359	0.217733	0.279022	0.21948
GRMZM2G058923_P01	0.267317	0.286406	0.304886	0.338182	0.266305	0.29374	0.277886	0.298611
GRMZM2G083551_P02	0.456051	0.456241	0.447812	0.47225	0.447498	0.440537	0.471656	0.474621
GRMZM2G414540_P01	0.319767	0.367674	0.319907	0.344939	0.32215	0.323482	0.322448	0.346299
GRMZM2G163578_P01	0.278942	0.239139	0.297511	0.264471	0.316174	0.287767	0.338911	0.310419
GRMZM2G337128_P01	0.321019	0.306904	0.274661	0.292365	0.290234	0.298621	0.272197	0.277333
GRMZM5G806649_P03	0.225918	0.256149	0.178524	0.225477	0.194058	0.208515	0.185999	0.192027
GRMZM2G322493_P01	0.344183	0.364012	0.320263	0.329879	0.336462	0.330599	0.323428	0.31784
GRMZM2G331754_P01	0.252333	0.278461	0.265298	0.262502	0.225876	0.253044	0.231815	0.230671
GRMZM2G176523_P02	0.342242	0.365522	0.331116	0.330802	0.33671	0.341007	0.306744	0.312524
GRMZM2G079471_P01	0.322089	0.338308	0.328817	0.360473	0.321297	0.332494	0.341649	0.321541
GRMZM2G093065_P01	0.251277	0.229457	0.261015	0.268117	0.233316	0.245003	0.253504	0.258312
GRMZM5G823629_P02	0.16503	0.191869	0.168451	0.17917	0.141682	0.161906	0.159404	0.165822
GRMZM2G121312_P01	0.272895	0.29873	0.303467	0.32352	0.27223	0.274006	0.28412	0.304365
GRMZM2G115660_P01	0.545704	0.48957	0.409413	0.436439	0.672027	0.421117	0.519683	0.506047
GRMZM2G406014_P01	0.281101	0.302893	0.291964	0.305308	0.266252	0.296065	0.291127	0.298621
GRMZM2G007915_P02	0.359934	0.412845	0.357145	0.401938	0.356642	0.351534	0.382759	0.377203
GRMZM2G045818_P01	0.174214	0.204235	0.221815	0.273413	0.167294	0.182734	0.225061	0.217901
GRMZM5G883764_P02	0.212246	0.258497	0.273854	0.292816	0.206172	0.235627	0.264112	0.256676
GRMZM2G306104_P01	0.21217	0.286608	0.232815	0.301177	0.232849	0.256629	0.231775	0.245977
GRMZM2G152278_P01	0.189537	0.210429	0.209026	0.241777	0.198725	0.196346	0.211553	0.209274
GRMZM2G359581_P01	0.25969	0.274909	0.186925	0.165796	0.203079	0.229722	0.175918	0.170627
GRMZM2G057140_P01	0.257266	0.234582	0.237621	0.224802	0.27759	0.263933	0.251811	0.252395
GRMZM2G075513_P01	0.297856	0.310747	0.276546	0.294539	0.28508	0.283573	0.291869	0.293123
GRMZM2G391627_P01	0.135665	0.198402	0.154416	0.224437	0.135812	0.168602	0.150803	0.165196
GRMZM2G098031_P01	0.264187	0.247204	0.245861	0.239436	0.27101	0.225166	0.248012	0.259125
GRMZM2G045404_P01	0.287705	0.229324	0.251507	0.230486	0.285741	0.24025	0.215145	0.259843
GRMZM2G439049_P01	0.327693	0.349685	0.293579	0.31544	0.333928	0.36035	0.348242	0.337749
GRMZM2G128080_P02	0.20439	0.273957	0.201916	0.344476	0.199524	0.238925	0.292904	0.243907
GRMZM2G147046_P01	0.329291	0.362147	0.311714	0.366246	0.307853	0.322857	0.332279	0.334279
GRMZM2G098957_P02	0.31854	0.319982	0.282528	0.319518	0.268246	0.292787	0.24599	0.285744
GRMZM2G064426_P01	0.259134	0.293216	0.26628	0.285535	0.21018	0.230145	0.216744	0.238766
GRMZM2G345840_P01	0.412488	0.380259	0.359867	0.360095	0.367557	0.367605	0.379592	0.372537
GRMZM2G055217_P01	0.160729	0.164399	0.178207	0.162606	0.1651	0.170885	0.166748	0.164658
GRMZM2G113017_P03	0.291467	0.282659	0.373264	0.348166	0.340846	0.337701	0.352731	0.339833
GRMZM5G866861_P02	0.431313	0.429428	0.382094	0.418174	0.416198	0.431665	0.417465	0.406997
GRMZM2G390221_P01	0.215878	0.213805	0.204743	0.206302	0.207562	0.206128	0.194341	0.217907
GRMZM2G090217_P03	0.325091	0.343927	0.342991	0.357204	0.321589	0.324975	0.312437	0.338452
GRMZM2G357112_P01	0.272273	0.265061	0.234321	0.254808	0.249492	0.236236	0.239904	0.247905
GRMZM2G425377_P01	0.240002	0.255875	0.234506	0.259854	0.255373	0.252308	0.25286	0.249223
GRMZM2G057743_P02	0.247955	0.272511	0.248144	0.278593	0.223599	0.242638	0.232168	0.254393
GRMZM2G104377_P03	0.299898	0.302861	0.288358	0.288269	0.263092	0.291798	0.286772	0.312285
GRMZM2G013461_P01	0.415963	0.50837	0.397703	0.53325	0.435332	0.441939	0.519012	0.415097
AC212219.3_FGP005	0.481614	0.45939	0.459973	0.458344	0.4385	0.436367	0.461116	0.471363
GRMZM2G139141_P01	0.231194	0.254938	0.232804	0.279563	0.224939	0.262899	0.255659	0.258002
GRMZM2G101502_P01	0.279328	0.307659	0.280624	0.317399	0.280698	0.295656	0.29604	0.275928
GRMZM2G065461_P01	0.263195	0.263417	0.240653	0.256797	0.24168	0.247847	0.234782	0.25163
GRMZM2G347808_P01	0.199049	0.217767	0.200563	0.214011	0.214445	0.209843	0.209972	0.201017
GRMZM2G143791_P01	0.414182	0.505538	0.337157	0.463903	0.267474	0.319878	0.335214	0.356653
GRMZM2G045581_P01	0.30604	0.268157	0.276726	0.257939	0.31592	0.308041	0.307298	0.293212
GRMZM2G164547_P01	0.376826	0.418957	0.360674	0.39772	0.342992	0.350139	0.372494	0.380198
GRMZM2G087201_P01	0.196269	0.219014	0.194505	0.211341	0.214794	0.201774	0.215585	0.213385
GRMZM2G143525_P01	0.324878	0.385757	0.342335	0.425038	0.359627	0.376078	0.385712	0.400575
GRMZM2G155512_P03	0.244881	0.284979	0.241327	0.256439	0.228814	0.258572	0.235886	0.249101
GRMZM2G387890_P01	0.325124	0.33912	0.335395	0.346278	0.320989	0.313948	0.345376	0.340436
GRMZM2G052670_P01	0.27712	0.299362	0.278959	0.300572	0.27552	0.293307	0.301979	0.306514
GRMZM2G154316_P01	0.22149	0.226564	0.217943	0.209468	0.193989	0.201763	0.191046	0.204404
GRMZM2G442404_P01	0.453756	0.465673	0.44839	0.465572	0.486447	0.516423	0.629142	0.534597
GRMZM5G886561_P03	0.286764	0.302775	0.274949	0.279018	0.302042	0.305053	0.283451	0.29928
GRMZM2G113495_P01	0.251823	0.238611	0.253902	0.233808	0.264381	0.238353	0.269535	0.249588
GRMZM2G005350_P02	0.326971	0.316773	0.3386	0.330372	0.335091	0.341356	0.335152	0.342351
GRMZM2G351417_P02	0.24165	0.274617	0.212765	0.258431	0.235706	0.260189	0.274653	0.241988
GRMZM2G175177_P01	0.329544	0.333869	0.341332	0.343167	0.319536	0.335431	0.330797	0.332991
GRMZM2G459642_P01	0.49321	0.527601	0.475494	0.53204	0.467386	0.502863	0.500157	0.50125
GRMZM2G066373_P01	0.163049	0.155041	0.164309	0.15663	0.175417	0.172623	0.180481	0.165784
GRMZM2G108138_P01	0.166297	0.161486	0.162465	0.149264	0.178588	0.176019	0.168902	0.170312
GRMZM2G100333_P01	0.315378	0.298488	0.358638	0.349601	0.352827	0.303007	0.337394	0.351334
GRMZM2G091143_P01	0.280656	0.301997	0.293356	0.305397	0.283168	0.290021	0.281307	0.297431
GRMZM2G019106_P01	0.194587	0.213242	0.239682	0.230414	0.176719	0.203221	0.17971	0.229091
GRMZM2G113990_P05	0.306571	0.347764	0.374601	0.351852	0.3081	0.324946	0.336728	0.316103
GRMZM2G086994_P01	0.310927	0.282732	0.327811	0.302352	0.276219	0.253417	0.276006	0.303868
GRMZM2G008353_P01	0.28673	0.329105	0.310751	0.248752	0.298868	0.291752	0.279158	0.288216
GRMZM2G134313_P01	0.260201	0.248878	0.242956	0.244564	0.259817	0.255804	0.240068	0.247713
GRMZM2G148790_P02	0.323625	0.295293	0.292508	0.292236	0.284573	0.274422	0.277412	0.293263
GRMZM2G024533_P01	0.391171	0.421939	0.492239	0.477663	0.366933	0.400685	0.365009	0.417694
GRMZM2G148904_P01	0.28833	0.320357	0.250297	0.257546	0.285182	0.289374	0.323971	0.318277
GRMZM2G022061_P05	0.151834	0.166496	0.189301	0.186464	0.152167	0.167312	0.146413	0.173345
GRMZM2G362949_P04	0.406088	0.457719	0.408561	0.502836	0.36476	0.409706	0.381428	0.402235
GRMZM2G020920_P01	0.237509	0.208716	0.21465	0.207719	0.205598	0.181848	0.20301	0.207617
GRMZM2G053908_P01	0.223176	0.23911	0.192111	0.202298	0.209681	0.209832	0.185772	0.204686
GRMZM2G103579_P01	0.420238	0.509644	0.421875	0.522924	0.419726	0.453788	0.465402	0.45307
GRMZM2G384293_P03	0.409171	0.463941	0.462342	0.564815	0.394227	0.435002	0.474705	0.462464
GRMZM2G130651_P01	0.298821	0.334329	0.35718	0.365648	0.307242	0.332008	0.339619	0.331819
GRMZM2G052562_P02	0.571666	0.587616	0.601146	0.718333	0.476074	0.522821	0.595717	0.593293
GRMZM2G167741_P01	0.325384	0.329783	0.327262	0.352518	0.314533	0.32174	0.347768	0.347678
GRMZM2G090865_P03	0.234968	0.146596	0.203773	0.150911	0.255289	0.195728	0.261078	0.218324
GRMZM2G064212_P02	0.333508	0.349054	0.317815	0.332054	0.312436	0.310234	0.366048	0.345518
GRMZM2G004138_P01	0.210464	0.207595	0.222434	0.212736	0.205655	0.199819	0.203873	0.20409
GRMZM2G023392_P01	0.390968	0.387303	0.351537	0.370888	0.367868	0.362551	0.388824	0.380063
GRMZM2G467356_P01	0.230213	0.252949	0.253202	0.260866	0.241725	0.259398	0.262574	0.239073
GRMZM2G374812_P01	0.750537	0.656888	0.812665	0.771888	0.622176	0.629029	0.696788	0.726696
GRMZM2G063262_P01	0.138639	0.169794	0.163099	0.186652	0.160759	0.172963	0.169737	0.171691
GRMZM5G836588_P01	0.362868	0.375707	0.369529	0.39231	0.38414	0.376819	0.36969	0.368937
GRMZM2G097568_P01	0.370197	0.430188	0.334486	0.415558	0.365066	0.381667	0.357646	0.34519
GRMZM2G459291_P01	0.296522	0.343553	0.299856	0.392298	0.30288	0.32464	0.367476	0.339442
GRMZM2G004111_P01	0.258608	0.251263	0.228987	0.268083	0.249459	0.245725	0.25056	0.247314
GRMZM2G136918_P03	0.198924	0.215621	0.187729	0.240025	0.198734	0.204732	0.211873	0.209028
GRMZM2G115372_P01	0.389575	0.368632	0.377269	0.339944	0.395162	0.401142	0.364972	0.363305
GRMZM2G019681_P01	0.204338	0.222262	0.206848	0.205816	0.201293	0.204595	0.206392	0.215123
GRMZM2G344993_P01	0.412864	0.415342	0.497912	0.482626	0.436013	0.435392	0.509951	0.476565
GRMZM2G038973_P01	0.456326	0.349367	0.242712	0.223581	0.499861	0.441919	0.22918	0.223721
GRMZM2G147587_P01	0.272569	0.247998	0.304999	0.309331	0.286016	0.272681	0.329303	0.310436
GRMZM2G170868_P01	0.306367	0.322633	0.318335	0.368699	0.311654	0.316746	0.376261	0.345973
GRMZM2G169773_P01	0.210907	0.208265	0.198423	0.217683	0.206712	0.212231	0.201561	0.210884
GRMZM5G871910_P02	0.282208	0.299883	0.278415	0.309128	0.277017	0.296452	0.296439	0.293791
GRMZM2G031177_P01	0.210128	0.207695	0.219494	0.225067	0.187416	0.190312	0.208298	0.218255
GRMZM5G801369_P02	0.293086	0.304259	0.29587	0.312125	0.274038	0.263041	0.298058	0.292856
GRMZM2G033805_P01	0.242614	0.236037	0.287876	0.296424	0.233675	0.202745	0.249207	0.251423
GRMZM2G092910_P01	0.474658	0.455562	0.461921	0.472185	0.458272	0.401801	0.460426	0.481842
GRMZM2G455075_P01	0.332893	0.334082	0.317631	0.30917	0.348837	0.328742	0.352517	0.342795
GRMZM2G092284_P01	0.467847	0.524784	0.475644	0.576495	0.44779	0.49137	0.499589	0.516479
GRMZM2G099334_P01	0.493068	0.485194	0.44111	0.448867	0.442129	0.455772	0.439861	0.460664
GRMZM2G042032_P02	0.24798	0.282966	0.442199	0.343797	0.261702	0.383149	0.37496	0.329913
GRMZM2G055704_P01	0.223664	0.172432	0.263542	0.203096	0.196655	0.168133	0.231843	0.207301
GRMZM2G120530_P01	0.262077	0.283829	0.249545	0.267235	0.207496	0.249602	0.232219	0.247997
GRMZM2G047018_P01	0.219064	0.22636	0.215108	0.217722	0.192043	0.175744	0.198615	0.222011
GRMZM2G051952_P02	0.219305	0.218413	0.279517	0.254457	0.250564	0.222881	0.284165	0.270699
GRMZM2G132944_P01	0.159142	0.177605	0.163975	0.176042	0.146417	0.170792	0.173091	0.166269
GRMZM2G000261_P01	0.171128	0.167132	0.165877	0.169264	0.161078	0.153661	0.169889	0.175304
GRMZM2G342039_P01	0.210545	0.241753	0.186656	0.201561	0.205733	0.207076	0.199774	0.21357
GRMZM2G173309_P01	0.201769	0.209629	0.204864	0.210267	0.199482	0.225217	0.197201	0.218238
GRMZM2G468439_P02	0.334554	0.333647	0.331726	0.297719	0.358896	0.323978	0.337927	0.34822
GRMZM6G397851_P01	0.296246	0.211079	0.323621	0.213733	0.240093	0.195444	0.271918	0.247866
GRMZM2G133756_P01	0.271165	0.305681	0.282512	0.331727	0.272162	0.298341	0.279579	0.292167
GRMZM2G020761_P01	0.24804	0.295245	0.169721	0.162715	0.25665	0.234592	0.14794	0.151762
GRMZM2G141241_P01	0.258973	0.238963	0.326105	0.288322	0.32068	0.271358	0.322779	0.306153
GRMZM2G108115_P01	0.275508	0.295946	0.261023	0.299843	0.304383	0.315873	0.28446	0.296297
GRMZM2G055458_P01	0.156301	0.158327	0.156835	0.166263	0.196348	0.163386	0.16402	0.171853
GRMZM2G074270_P01	0.197247	0.239585	0.204866	0.224867	0.196492	0.207869	0.195561	0.200181
GRMZM2G066612_P03	0.421775	0.410905	0.40308	0.43349	0.413282	0.384892	0.431968	0.433941
GRMZM5G816015_P01	0.41565	0.479128	0.526243	0.608634	0.434275	0.446025	0.538211	0.551835
GRMZM2G428964_P01	0.139272	0.172488	0.162845	0.191369	0.159966	0.165078	0.168488	0.173828
GRMZM2G300258_P01	0.200048	0.197941	0.218352	0.222592	0.194379	0.196411	0.219457	0.217486
GRMZM2G438386_P01	0.353212	0.492724	0.38543	0.50617	0.384298	0.427368	0.375116	0.409014
GRMZM2G337191_P01	0.243141	0.274927	0.325388	0.279371	0.297818	0.28514	0.319701	0.307847
GRMZM2G059981_P01	0.250695	0.25951	0.238427	0.252766	0.233072	0.255391	0.246802	0.263337
GRMZM2G372930_P01	0.205771	0.212031	0.206298	0.224358	0.189453	0.200469	0.211553	0.216732
GRMZM2G319465_P01	0.248071	0.248682	0.267966	0.247465	0.259348	0.247757	0.234208	0.246504
AC209257.4_FGP008	0.232237	0.235249	0.217612	0.325807	0.227056	0.24073	0.265004	0.256304
GRMZM2G159142_P01	0.252879	0.252588	0.214308	0.276613	0.218661	0.275071	0.259687	0.250194
GRMZM2G019783_P01	0.392526	0.327183	0.325735	0.301802	0.329506	0.337914	0.320847	0.331154
GRMZM2G054267_P01	0.29913	0.272336	0.302567	0.284623	0.304019	0.296527	0.283756	0.290375
GRMZM2G413193_P01	0.27988	0.288687	0.319972	0.300469	0.276472	0.285981	0.280403	0.301468
GRMZM2G092475_P02	0.350835	0.285119	0.36653	0.33597	0.320251	0.317447	0.345528	0.344987
GRMZM2G178190_P01	0.340099	0.373801	0.285738	0.312295	0.327386	0.360431	0.334335	0.332581
GRMZM2G074040_P01	0.227366	0.192762	0.18539	0.148651	0.267893	0.232083	0.208164	0.204357
GRMZM2G078252_P01	0.29985	0.310745	0.292165	0.289077	0.281106	0.29487	0.27228	0.29324
GRMZM2G087671_P01	0.285167	0.321977	0.359893	0.398884	0.29788	0.308303	0.332432	0.36213
GRMZM2G028302_P01	0.148071	0.152385	0.166489	0.206892	0.148956	0.140097	0.193482	0.176962
GRMZM2G358618_P02	0.146787	0.15516	0.176334	0.177448	0.154939	0.169288	0.18166	0.171718
GRMZM2G090715_P01	0.312095	0.320533	0.281689	0.306751	0.280925	0.279042	0.267127	0.285172
GRMZM2G318010_P01	0.393342	0.393827	0.410246	0.418384	0.457168	0.433801	0.417386	0.409181
GRMZM2G032977_P01	0.233624	0.245861	0.235022	0.230989	0.24858	0.261542	0.277837	0.266545
GRMZM2G046966_P03	0.470344	0.444335	0.434142	0.456905	0.443267	0.459748	0.4596	0.498326
GRMZM2G096655_P01	0.301424	0.326576	0.282677	0.308988	0.26026	0.282602	0.269249	0.301559
GRMZM2G134846_P01	0.195318	0.118624	0.186646	0.132055	0.193915	0.149661	0.182881	0.174234
GRMZM2G023833_P01	0.300873	0.36764	0.302931	0.379902	0.285051	0.355877	0.347646	0.326748
GRMZM2G029001_P01	0.282853	0.23167	0.256246	0.230872	0.263111	0.243116	0.246036	0.246096
GRMZM2G137329_P01	0.222833	0.221131	0.262492	0.333204	0.192754	0.26365	0.24067	0.263268
GRMZM2G097747_P01	0.161774	0.156474	0.178144	0.168425	0.155904	0.149863	0.178464	0.184286
GRMZM2G071987_P01	0.26056	0.320361	0.361583	0.316055	0.237113	0.206241	0.310551	0.32087
GRMZM2G097843_P01	0.184933	0.158727	0.17525	0.160029	0.155944	0.151223	0.173252	0.173974
GRMZM6G832911_P01	0.184402	0.215304	0.215209	0.245851	0.185763	0.196567	0.210334	0.213236
GRMZM2G056116_P01	0.465458	0.457459	0.442911	0.450815	0.492619	0.482337	0.436906	0.438162
GRMZM2G146644_P01	0.214286	0.199324	0.216891	0.194143	0.218397	0.203424	0.208247	0.211955
GRMZM2G056645_P01	0.251537	0.263341	0.24539	0.264304	0.252533	0.243405	0.233623	0.245867
GRMZM2G151285_P02	0.20976	0.256921	0.252133	0.287711	0.223249	0.270453	0.247199	0.252574
GRMZM2G094589_P01	0.212717	0.224452	0.195769	0.205078	0.185818	0.208952	0.213895	0.219986
GRMZM2G149201_P01	0.292718	0.321057	0.331905	0.393009	0.307908	0.301742	0.36975	0.348577
GRMZM2G043174_P01	0.258847	0.260307	0.251166	0.246493	0.241355	0.256237	0.234703	0.250892
GRMZM2G409430_P02	0.628382	0.645632	0.619608	0.640612	0.602952	0.616427	0.610326	0.636062
GRMZM2G071714_P01	0.299288	0.313902	0.36368	0.372787	0.305305	0.304218	0.350809	0.356678
GRMZM2G152781_P01	0.185009	0.212937	0.201254	0.200924	0.188893	0.209251	0.239797	0.228602
GRMZM2G324297_P02	0.165065	0.165294	0.260607	0.232988	0.170663	0.180206	0.238231	0.253613
GRMZM2G180979_P01	0.175173	0.148584	0.14656	0.147016	0.194325	0.17777	0.176019	0.167886
GRMZM2G021015_P01	0.220078	0.262387	0.26596	0.286993	0.205434	0.238399	0.248397	0.272352
GRMZM2G035202_P01	0.163543	0.153926	0.163579	0.161537	0.167413	0.170048	0.181246	0.172042
GRMZM2G054621_P01	0.158519	0.156089	0.176853	0.172698	0.149937	0.179842	0.169387	0.170009
GRMZM2G074107_P02	0.272597	0.243591	0.277312	0.227646	0.244479	0.230927	0.242663	0.260785
GRMZM2G169929_P01	0.213077	0.211533	0.211407	0.200245	0.206444	0.21129	0.201218	0.211453
GRMZM2G079127_P01	0.348354	0.329584	0.341616	0.331657	0.301035	0.30633	0.361995	0.346096
GRMZM2G128981_P01	0.207562	0.192795	0.215869	0.212893	0.197331	0.199768	0.218355	0.222094
GRMZM2G080129_P01	0.181108	0.202404	0.224207	0.261533	0.169644	0.181373	0.216311	0.230087
GRMZM2G083344_P02	0.208173	0.211544	0.191877	0.219954	0.19543	0.19846	0.220365	0.220863
GRMZM2G168588_P01	0.191754	0.220302	0.210481	0.242941	0.179881	0.187714	0.217711	0.215883
GRMZM2G181453_P01	0.23891	0.263117	0.259193	0.262848	0.220561	0.237506	0.25047	0.267395
GRMZM2G131815_P01	0.26006	0.270724	0.204275	0.243197	0.280929	0.253903	0.24516	0.241751
GRMZM2G024730_P01	0.276467	0.234132	0.257727	0.262459	0.237904	0.219114	0.249176	0.263021
GRMZM2G039650_P01	0.284727	0.298289	0.312181	0.296545	0.274431	0.284384	0.283556	0.29922
GRMZM2G038588_P01	0.432773	0.440855	0.403128	0.424624	0.39844	0.402129	0.414675	0.416709
GRMZM2G148194_P05	0.484067	0.493094	0.579896	0.644895	0.468501	0.481073	0.585205	0.596603
GRMZM2G008095_P01	0.328937	0.34244	0.330685	0.353422	0.308366	0.316531	0.341837	0.344448
GRMZM2G139250_P01	0.216393	0.272025	0.243901	0.303637	0.216953	0.245171	0.238871	0.263048
GRMZM2G420910_P01	0.321179	0.289106	0.263537	0.235343	0.330214	0.328071	0.284294	0.28159
GRMZM2G074241_P01	0.432159	0.371251	0.344472	0.334876	0.410694	0.372068	0.365602	0.368878
GRMZM2G139600_P01	0.22824	0.257768	0.234477	0.263815	0.217081	0.257615	0.272347	0.268656
GRMZM2G166507_P01	0.260758	0.2766	0.283085	0.353691	0.238902	0.254221	0.341626	0.324451
GRMZM2G153722_P01	0.205829	0.216465	0.16592	0.20887	0.206037	0.206461	0.232948	0.224136
GRMZM2G104258_P01	0.341039	0.356869	0.421679	0.38442	0.355714	0.375962	0.379855	0.384462
GRMZM2G085301_P01	0.844406	0.682956	0.486934	0.415331	0.873669	0.776879	0.470182	0.449644
GRMZM2G045716_P01	0.266665	0.266809	0.300389	0.273958	0.29333	0.313623	0.305418	0.313141
GRMZM2G055807_P02	0.289414	0.273437	0.301475	0.283196	0.290149	0.268806	0.308505	0.318351
GRMZM5G879240_P01	0.19155	0.222588	0.201673	0.225277	0.182874	0.193781	0.225889	0.223035
GRMZM2G312944_P01	0.294985	0.358059	0.343608	0.370438	0.289483	0.308296	0.33627	0.365527
GRMZM2G102714_P01	0.172355	0.179313	0.219855	0.233943	0.18678	0.221546	0.231665	0.221208
GRMZM2G057237_P01	0.355379	0.396781	0.329978	0.386439	0.389275	0.388528	0.389473	0.364146
GRMZM2G097726_P02	0.284388	0.264539	0.310676	0.271343	0.290602	0.285496	0.315888	0.310402
GRMZM2G141600_P01	0.16132	0.160027	0.186454	0.171603	0.153403	0.159246	0.164333	0.176948
GRMZM2G419969_P01	0.137222	0.165329	0.171251	0.186854	0.157574	0.156418	0.179883	0.178803
GRMZM2G128918_P01	0.2776	0.266241	0.29451	0.288997	0.283809	0.2801	0.322328	0.319748
GRMZM2G034511_P02	0.222395	0.256014	0.227838	0.278661	0.230575	0.238879	0.281746	0.263892
GRMZM2G092481_P01	0.363959	0.407629	0.333263	0.421506	0.346405	0.395271	0.36034	0.371626
GRMZM2G082683_P01	0.214167	0.239803	0.261666	0.307516	0.219184	0.229348	0.260726	0.26759
GRMZM6G675851_P01	0.261361	0.291145	0.257839	0.274323	0.302597	0.324594	0.310826	0.310649
GRMZM2G313649_P06	0.198711	0.235848	0.189369	0.223642	0.185133	0.20747	0.207725	0.218769
GRMZM5G884270_P02	0.194295	0.165896	0.149409	0.174574	0.133415	0.183352	0.156532	0.175861
GRMZM5G889321_P01	0.246956	0.248477	0.243976	0.264365	0.236987	0.234789	0.257465	0.266985
GRMZM2G023105_P01	0.266087	0.224938	0.28084	0.250534	0.234578	0.235806	0.24257	0.264647
GRMZM2G030529_P01	0.279226	0.244108	0.323773	0.288601	0.296521	0.269851	0.32041	0.310843
GRMZM2G037226_P02	0.338374	0.343722	0.349	0.336184	0.315421	0.336769	0.313367	0.333831
GRMZM2G135655_P01	0.355147	0.338088	0.344283	0.331747	0.307906	0.300434	0.33418	0.354883
GRMZM2G028709_P01	0.298972	0.311802	0.308985	0.341986	0.348731	0.351108	0.350527	0.354555
GRMZM2G405815_P02	0.326234	0.332541	0.326613	0.341889	0.321137	0.334948	0.332758	0.350547
GRMZM2G003769_P01	0.234423	0.227774	0.231807	0.251538	0.27707	0.247259	0.267601	0.262529
GRMZM2G038066_P01	0.160276	0.152301	0.159439	0.161532	0.169823	0.176438	0.169769	0.183756
GRMZM2G161459_P02	0.25926	0.23398	0.310311	0.258463	0.23026	0.200566	0.245601	0.261559
GRMZM2G042127_P01	0.303145	0.306276	0.416531	0.403625	0.329336	0.333522	0.442583	0.464982
GRMZM2G041799_P01	0.230458	0.272608	0.258378	0.293707	0.217042	0.221095	0.237049	0.269663
GRMZM2G150201_P03	0.232124	0.258599	0.245107	0.2869	0.217002	0.226665	0.270942	0.262662
GRMZM2G134230_P01	0.265342	0.34041	0.237757	0.309557	0.270048	0.30391	0.311731	0.294578
GRMZM2G320708_P01	0.261769	0.25274	0.230142	0.255671	0.314194	0.354898	0.341499	0.322421
GRMZM2G399858_P02	0.31719	0.314677	0.344987	0.364298	0.321936	0.330601	0.325085	0.347891
GRMZM2G149543_P01	0.284188	0.311858	0.323917	0.298696	0.231335	0.274326	0.277543	0.33147
GRMZM2G042371_P01	0.244244	0.250148	0.256629	0.296343	0.228664	0.21224	0.253682	0.258048
GRMZM2G114888_P02	0.179821	0.227413	0.180582	0.255782	0.173387	0.215157	0.220204	0.214322
GRMZM2G148810_P01	0.352689	0.311819	0.302991	0.330377	0.333794	0.326873	0.348746	0.359377
GRMZM2G061078_P03	0.178567	0.225055	0.202393	0.2414	0.1709	0.204441	0.229552	0.214358
GRMZM2G449355_P02	0.158959	0.148666	0.171725	0.160586	0.160228	0.17304	0.184663	0.175465
AC200210.1_FGP006	0.25274	0.247628	0.244909	0.250397	0.248047	0.239388	0.257843	0.259049
GRMZM2G107491_P02	0.372307	0.300241	0.42449	0.340025	0.425794	0.355187	0.397758	0.384197
GRMZM2G312738_P01	0.392911	0.384801	0.353898	0.382282	0.357572	0.383773	0.365736	0.379026
GRMZM2G333923_P01	0.224964	0.225889	0.270878	0.281876	0.22241	0.228705	0.265963	0.279317
GRMZM2G447795_P01	0.375898	0.40826	0.280725	0.286816	0.335578	0.311079	0.335205	0.333106
GRMZM2G123940_P01	0.125128	0.167122	0.168124	0.185782	0.190973	0.172737	0.15525	0.168219
GRMZM2G158205_P01	0.192382	0.263596	0.236626	0.40097	0.190239	0.200747	0.250178	0.265262
GRMZM2G066485_P01	0.258879	0.254556	0.228133	0.242823	0.264013	0.255302	0.248618	0.247676
GRMZM2G060540_P01	0.384564	0.380222	0.422794	0.398136	0.338385	0.349857	0.34117	0.384872
GRMZM2G065066_P01	0.362425	0.30775	0.388631	0.341598	0.313278	0.272842	0.346714	0.333428
GRMZM5G800853_P01	0.215103	0.264775	0.247279	0.329415	0.197106	0.196503	0.273469	0.276349
GRMZM5G899390_P01	0.305884	0.334331	0.307125	0.34716	0.328235	0.332797	0.363666	0.347468
GRMZM2G178801_P01	0.261186	0.260449	0.242338	0.268932	0.226213	0.236468	0.24312	0.261294
GRMZM2G451357_P01	0.186037	0.190868	0.209446	0.203499	0.214921	0.216246	0.225358	0.220291
GRMZM2G071582_P02	0.389279	0.352397	0.363865	0.331934	0.414129	0.38587	0.380312	0.382214
GRMZM2G095043_P01	0.261268	0.292281	0.290841	0.330159	0.263083	0.27062	0.309563	0.315519
GRMZM2G063972_P01	0.188006	0.150731	0.169279	0.169245	0.150095	0.17322	0.165361	0.167395
GRMZM2G027420_P01	0.21502	0.244845	0.248291	0.272721	0.250661	0.234193	0.265256	0.269013
GRMZM2G457415_P01	0.165836	0.179059	0.176477	0.149756	0.179045	0.156799	0.159541	0.16682
GRMZM2G090226_P01	0.380662	0.329983	0.334459	0.301449	0.332735	0.31857	0.33482	0.333988
GRMZM2G007060_P01	0.224013	0.21454	0.262871	0.24205	0.245023	0.246236	0.271355	0.293911
GRMZM2G133749_P02	0.183861	0.200528	0.220663	0.2364	0.18141	0.192056	0.218291	0.233456
GRMZM2G124617_P01	0.292599	0.31491	0.391652	0.380488	0.295624	0.282414	0.358957	0.350022
GRMZM2G140832_P01	0.248336	0.248184	0.389669	0.462249	0.231204	0.303734	0.39019	0.393101
GRMZM2G170299_P01	0.284321	0.300552	0.282314	0.310643	0.28688	0.275504	0.283946	0.309173
GRMZM2G020187_P01	0.271655	0.306581	0.29041	0.350575	0.246921	0.272058	0.298301	0.296832
GRMZM5G861678_P06	0.349761	0.35611	0.379952	0.373908	0.374153	0.379885	0.397108	0.389123
GRMZM2G121565_P01	0.399444	0.363841	0.43082	0.406375	0.426824	0.383274	0.460297	0.462459
GRMZM2G152929_P03	0.388017	0.376387	0.360706	0.368141	0.37147	0.367085	0.387	0.381193
GRMZM2G494600_P01	0.280896	0.293696	0.269446	0.301496	0.284074	0.280671	0.303885	0.319171
GRMZM2G305582_P01	0.211581	0.197555	0.226396	0.207155	0.19026	0.19125	0.216766	0.225704
GRMZM2G128663_P01	0.163895	0.17562	0.152712	0.161395	0.157666	0.174718	0.168072	0.179256
AC197699.3_FGP003	0.235003	0.251024	0.243988	0.243362	0.26107	0.252097	0.253439	0.260017
GRMZM2G111510_P01	0.307961	0.377547	0.304311	0.369107	0.292096	0.337228	0.312256	0.366161
GRMZM2G178602_P01	0.361057	0.386167	0.36939	0.425657	0.339135	0.35135	0.379464	0.387779
GRMZM2G028307_P02	0.248553	0.234035	0.263755	0.257283	0.243838	0.231163	0.260298	0.261075
GRMZM2G401869_P01	0.229411	0.207166	0.207248	0.201514	0.209014	0.20362	0.18827	0.220425
GRMZM2G097249_P01	0.196009	0.178594	0.207315	0.19354	0.208586	0.237638	0.214596	0.230389
GRMZM2G124096_P01	0.147591	0.18576	0.1529	0.171725	0.160772	0.173284	0.163218	0.178083
GRMZM2G040079_P01	0.229913	0.237761	0.252741	0.261151	0.241546	0.248527	0.270156	0.258206
GRMZM2G057853_P01	0.356886	0.375449	0.380544	0.385246	0.368521	0.364407	0.379497	0.389449
GRMZM2G377887_P01	0.16442	0.168903	0.153442	0.176553	0.159413	0.168934	0.164827	0.176842
GRMZM2G149150_P01	0.183738	0.193055	0.24043	0.211993	0.18031	0.196328	0.220364	0.24045
GRMZM6G474234_P01	0.43085	0.443537	0.408061	0.404899	0.394368	0.399969	0.428927	0.422722
GRMZM2G166897_P01	0.373435	0.411719	0.396024	0.409216	0.333924	0.345018	0.361002	0.369664
GRMZM2G036905_P01	0.278535	0.295551	0.357172	0.364515	0.291878	0.345861	0.370824	0.362331
GRMZM2G180720_P03	0.256325	0.27241	0.225973	0.25961	0.227258	0.256232	0.246617	0.255576
GRMZM2G162690_P01	0.301892	0.345528	0.183222	0.195875	0.291094	0.310139	0.181657	0.190592
GRMZM2G106622_P01	0.161169	0.154324	0.163589	0.143616	0.173484	0.169804	0.176567	0.190779
GRMZM2G028132_P01	0.188958	0.22137	0.210328	0.249177	0.17262	0.156769	0.232681	0.234763
GRMZM2G005646_P01	0.311962	0.337196	0.385759	0.353747	0.298965	0.303586	0.329399	0.346052
GRMZM2G157207_P05	0.20306	0.237023	0.253154	0.27573	0.234345	0.227998	0.299388	0.269302
GRMZM2G135739_P01	0.414031	0.363173	0.33795	0.288266	0.488063	0.36183	0.373671	0.373016
GRMZM2G043310_P01	0.200887	0.222257	0.199516	0.220629	0.196482	0.208254	0.20327	0.215373
GRMZM2G116563_P01	0.343474	0.37451	0.351976	0.391931	0.370102	0.388466	0.403526	0.376015
GRMZM2G409839_P01	0.320148	0.302051	0.323391	0.345572	0.312921	0.346766	0.348649	0.367168
GRMZM2G097662_P01	0.163454	0.164043	0.17349	0.148983	0.170238	0.15582	0.172973	0.184333
GRMZM2G147332_P01	0.293696	0.285325	0.29344	0.272532	0.2869	0.300918	0.29747	0.303052
GRMZM2G134866_P01	0.234498	0.233776	0.274043	0.249298	0.232564	0.242165	0.267035	0.26662
GRMZM2G148811_P01	0.232973	0.252233	0.258649	0.26471	0.22397	0.237329	0.25495	0.275187
GRMZM2G073861_P03	0.196618	0.158984	0.208272	0.17252	0.240259	0.222762	0.237076	0.230175
GRMZM2G083642_P02	0.221907	0.252062	0.259277	0.294449	0.218344	0.237131	0.2511	0.265729
GRMZM2G118385_P01	0.440688	0.440311	0.478896	0.513144	0.401709	0.409235	0.461208	0.521476
GRMZM2G484880_P02	0.217511	0.217186	0.238422	0.277649	0.237996	0.249389	0.276191	0.285657
GRMZM2G081910_P01	0.234534	0.206762	0.282305	0.264267	0.232057	0.226676	0.278777	0.274623
GRMZM2G062554_P01	0.249776	0.227323	0.255349	0.240538	0.249154	0.227428	0.266121	0.284311
GRMZM2G096946_P01	0.327333	0.343597	0.357957	0.387443	0.292507	0.300662	0.30553	0.351638
EF517601.1_FGP010	0.246535	0.252242	0.259846	0.248377	0.234224	0.242871	0.248364	0.26754
GRMZM2G064390_P01	0.243323	0.239533	0.265884	0.250159	0.235077	0.238797	0.256948	0.270279
GRMZM2G125977_P01	0.194957	0.162619	0.260195	0.209294	0.174612	0.181585	0.251485	0.231919
GRMZM2G180430_P02	0.25519	0.262502	0.276209	0.301169	0.284219	0.283019	0.340436	0.330589
GRMZM2G083788_P01	0.224067	0.199645	0.310538	0.278844	0.217378	0.208875	0.285457	0.275197
GRMZM2G056145_P01	0.481586	0.514955	0.541119	0.523363	0.451659	0.477875	0.485513	0.523931
GRMZM2G145775_P01	0.249311	0.243874	0.237343	0.256501	0.238087	0.266164	0.245326	0.263395
GRMZM5G878153_P01	0.294551	0.314144	0.188825	0.195497	0.30286	0.304031	0.192893	0.2072
GRMZM2G163157_P01	0.161512	0.170924	0.185653	0.161574	0.153135	0.162087	0.158711	0.179739
GRMZM2G176977_P02	0.234102	0.258811	0.339395	0.37174	0.224703	0.229532	0.336445	0.338606
GRMZM2G046658_P02	0.42869	0.42148	0.512725	0.510364	0.388173	0.405903	0.486352	0.512981
GRMZM2G049424_P01	0.264155	0.290512	0.265499	0.317855	0.262316	0.293857	0.328659	0.31048
GRMZM2G022229_P01	0.16917	0.198139	0.248703	0.250495	0.163542	0.193034	0.217674	0.225909
GRMZM2G077809_P02	0.187282	0.147155	0.180806	0.153283	0.163186	0.153232	0.175172	0.173218
AC210003.2_FGP015	0.326464	0.310598	0.378365	0.421105	0.324215	0.372451	0.452576	0.414226
GRMZM2G157350_P01	0.362597	0.312962	0.259421	0.241959	0.357143	0.313771	0.246916	0.238565
GRMZM2G013115_P02	0.281564	0.26136	0.392095	0.355497	0.262698	0.297034	0.39563	0.420788
GRMZM2G504910_P02	0.268492	0.295615	0.340988	0.395196	0.281079	0.312081	0.401572	0.371644
GRMZM2G018018_P01	0.552409	0.483396	0.313126	0.32454	0.555347	0.493189	0.294598	0.316728
GRMZM2G107562_P01	0.353351	0.276239	0.24911	0.199252	0.362022	0.301451	0.301051	0.290857
GRMZM2G100920_P02	0.317418	0.305314	0.157956	0.204754	0.313975	0.306914	0.189448	0.20422
GRMZM2G170532_P02	0.468516	0.488457	0.459634	0.394885	0.516287	0.538125	0.427791	0.372973
GRMZM2G118917_P01	0.33384	0.318017	0.326585	0.391485	0.304448	0.28246	0.342394	0.367439
GRMZM2G143102_P01	0.30187	0.318409	0.333362	0.376556	0.290749	0.291038	0.369187	0.385495
GRMZM2G158918_P01	0.259391	0.230262	0.251287	0.268164	0.234223	0.220774	0.266304	0.269595
GRMZM2G078440_P01	0.266633	0.294127	0.320782	0.346288	0.238223	0.248808	0.298331	0.320141
GRMZM2G106647_P01	0.343161	0.383211	0.220959	0.241881	0.353463	0.338521	0.228031	0.224106
GRMZM2G371375_P01	0.478419	0.621549	0.623303	0.814917	0.3421	0.400978	0.33406	0.384673
GRMZM5G876434_P04	0.150951	0.153265	0.15338	0.17661	0.159484	0.174099	0.176366	0.189178
GRMZM5G867390_P01	0.459943	0.428718	0.466273	0.434602	0.433221	0.440971	0.502551	0.500388
GRMZM2G155837_P02	0.449781	0.461123	0.42464	0.440057	0.488983	0.474269	0.451328	0.476487
GRMZM2G139093_P02	0.349977	0.377568	0.396909	0.395134	0.341761	0.35514	0.383042	0.400468
GRMZM2G022054_P05	0.215531	0.215083	0.277491	0.262202	0.216186	0.278304	0.271253	0.263951
GRMZM2G137961_P01	0.28535	0.365407	0.293267	0.417228	0.286168	0.33538	0.330365	0.353502
GRMZM2G176056_P01	0.304622	0.315278	0.336943	0.368696	0.316901	0.330265	0.352989	0.340974
GRMZM2G104269_P01	0.582129	0.526859	0.898508	0.796576	0.577257	0.574234	0.868053	0.843051
GRMZM2G446625_P03	0.452746	0.406373	0.467646	0.457781	0.462187	0.4235	0.482033	0.514401
GRMZM2G095810_P01	0.309713	0.353597	0.320156	0.344907	0.329253	0.329856	0.31447	0.364715
GRMZM2G114513_P01	0.458093	0.523299	0.415759	0.412638	0.516307	0.528972	0.402534	0.409066
GRMZM2G004106_P01	0.436395	0.422349	0.261615	0.257075	0.382676	0.375754	0.260256	0.270548
GRMZM2G343080_P01	0.213099	0.255891	0.231814	0.29765	0.214044	0.240182	0.271673	0.275646
GRMZM2G055643_P03	0.398356	0.422988	0.397574	0.454285	0.359436	0.405403	0.431887	0.463404
GRMZM2G089149_P03	0.19081	0.17593	0.235153	0.234029	0.190001	0.187467	0.22262	0.230656
GRMZM2G106588_P01	0.485644	0.454618	0.297588	0.308352	0.435025	0.421683	0.283895	0.313195
GRMZM2G156517_P01	0.228855	0.231065	0.261809	0.300584	0.231695	0.209657	0.26654	0.269794
GRMZM2G130333_P01	0.188283	0.18457	0.220091	0.21351	0.197644	0.194891	0.23279	0.234888
AC210013.4_FGP006	0.35408	0.345077	0.296534	0.295871	0.339228	0.34943	0.339452	0.346994
GRMZM2G085411_P01	0.505569	0.480495	0.352634	0.328125	0.53414	0.476063	0.326044	0.330264
GRMZM2G068471_P01	0.297792	0.369349	0.355949	0.510989	0.312553	0.32579	0.414378	0.413199
GRMZM2G058447_P01	0.268336	0.234368	0.279163	0.322367	0.290836	0.277302	0.330131	0.330831
GRMZM2G062481_P01	0.29957	0.486278	0.270981	0.426023	0.306046	0.339578	0.285742	0.252448
GRMZM2G023387_P01	0.408121	0.36627	0.435033	0.41015	0.386015	0.382042	0.466135	0.479567
GRMZM2G037485_P01	0.509003	0.449916	0.257507	0.273707	0.56763	0.341811	0.292098	0.308328
GRMZM2G390400_P02	0.207321	0.214063	0.279301	0.285447	0.209595	0.207414	0.295986	0.300874
GRMZM2G052336_P02	0.222748	0.242105	0.334728	0.290377	0.194208	0.217404	0.236055	0.262377
GRMZM2G088469_P01	0.194413	0.176738	0.21836	0.173344	0.238756	0.1878	0.234658	0.242598
AC203985.4_FGP005	0.37684	0.486652	0.376494	0.481832	0.397545	0.430002	0.403058	0.380909
GRMZM2G072529_P01	0.713304	0.631821	0.35776	0.374014	0.502012	0.527999	0.459654	0.433436
GRMZM2G047867_P01	0.493194	0.494562	0.368459	0.378494	0.450944	0.441893	0.339138	0.36665
GRMZM2G115398_P01	0.346132	0.399043	0.465347	0.520559	0.332792	0.341588	0.434081	0.493791
GRMZM2G096591_P01	0.178453	0.176744	0.231232	0.213941	0.188021	0.187814	0.236719	0.253744
GRMZM2G128434_P01	0.216609	0.205027	0.374394	0.334185	0.233249	0.225248	0.376502	0.36812
GRMZM2G302045_P02	0.229489	0.226559	0.193159	0.184158	0.225735	0.220669	0.189361	0.197537
GRMZM2G422938_P01	0.178324	0.192694	0.202206	0.227313	0.196704	0.225739	0.216198	0.227488
GRMZM2G004377_P02	0.315854	0.271803	0.317163	0.270068	0.270872	0.254225	0.308865	0.324484
GRMZM5G897988_P01	0.291292	0.376338	0.330086	0.34547	0.302376	0.352704	0.286261	0.382139
GRMZM2G074099_P01	0.166198	0.142423	0.160944	0.170821	0.158189	0.15201	0.18995	0.192799
GRMZM2G028570_P01	0.464041	0.542557	0.391626	0.395453	0.35702	0.425504	0.376966	0.380167
GRMZM5G855891_P01	0.396123	0.41557	0.447682	0.447831	0.378644	0.36786	0.42832	0.451303
GRMZM2G137715_P03	0.193874	0.197702	0.268851	0.346147	0.196744	0.206863	0.309581	0.280237
GRMZM2G170632_P02	0.274534	0.299614	0.356355	0.457815	0.247296	0.264399	0.35479	0.411864
GRMZM2G088961_P01	0.222284	0.267936	0.370029	0.359367	0.221896	0.235872	0.308558	0.347393
GRMZM2G057328_P01	0.656256	0.759486	0.350755	0.384859	0.545852	0.56996	0.368193	0.36464
GRMZM2G152549_P01	0.485623	0.531025	0.612411	0.638979	0.420714	0.4225	0.583215	0.638865
GRMZM2G074805_P01	0.565904	0.702147	0.501157	0.645565	0.55704	0.629423	0.53838	0.527052
GRMZM2G128268_P01	0.633499	0.476485	0.355609	0.312835	0.617698	0.503622	0.388033	0.378886
GRMZM2G130305_P01	1.14034	1.09712	0.76795	0.817662	1.15614	1.05218	0.836497	0.798774
GRMZM2G141009_P01	0.495716	0.479026	0.390234	0.35568	0.425085	0.447109	0.371051	0.369433
GRMZM2G027272_P01	0.18969	0.158669	0.173346	0.151197	0.161366	0.140941	0.161558	0.196567
GRMZM2G071292_P01	0.276653	0.282911	0.411365	0.401082	0.257121	0.266175	0.376128	0.395233
GRMZM6G132224_P01	0.313684	0.57687	0.349921	0.720069	0.309939	0.354107	0.354762	0.353981
GRMZM2G433162_P01	0.526084	0.51696	0.353005	0.356705	0.458081	0.443413	0.331237	0.347849
GRMZM2G368398_P01	0.364439	0.35537	0.303751	0.339036	0.334273	0.327994	0.317289	0.324515
GRMZM2G126496_P02	0.630952	0.507272	0.362223	0.376369	0.523512	0.526617	0.36142	0.378302
GRMZM2G158526_P02	0.456685	0.50413	0.391157	0.410823	0.455704	0.428537	0.327374	0.358923
GRMZM2G018044_P01	0.143799	0.158639	0.263855	0.255018	0.156832	0.162591	0.250857	0.275077
GRMZM2G350626_P03	0.323631	0.314899	0.271322	0.277785	0.290063	0.300533	0.283849	0.27125
GRMZM2G005980_P01	0.412833	0.525177	0.339642	0.451283	0.407777	0.452592	0.390041	0.35399
GRMZM5G805350_P01	0.222221	0.18713	0.297088	0.261068	0.238158	0.205221	0.292492	0.296621
GRMZM2G123558_P02	0.299824	0.293751	0.385948	0.304082	0.409319	0.421163	0.468328	0.417585
GRMZM2G574534_P02	0.566466	0.520576	0.315334	0.361961	0.456293	0.438183	0.327085	0.347436
GRMZM5G889520_P01	0.667825	0.698827	0.567333	0.48708	0.760844	0.790727	0.550856	0.476508
GRMZM2G063287_P01	0.186195	0.293364	0.348549	0.482376	0.134179	0.198181	0.168612	0.188545
GRMZM2G085675_P01	0.36653	0.42671	0.289082	0.300095	0.346769	0.380002	0.268958	0.28852
GRMZM2G425211_P01	0.344155	0.329766	0.259374	0.264654	0.327343	0.309862	0.247673	0.250506
GRMZM2G300348_P02	0.433408	0.410612	0.388207	0.402506	0.474686	0.475348	0.391417	0.357149
GRMZM2G090576_P01	0.686024	0.81956	0.608256	0.735579	0.63757	0.636108	0.595498	0.614738
GRMZM2G113761_P02	0.177906	0.206086	0.237001	0.24115	0.153046	0.185541	0.227655	0.238282
GRMZM2G162764_P01	0.251367	0.250712	0.240517	0.226665	0.272384	0.280508	0.243686	0.234161
GRMZM2G034975_P01	0.320054	0.328102	0.270062	0.273623	0.295283	0.306099	0.269048	0.271061
GRMZM2G058227_P01	0.365211	0.409743	0.274124	0.262216	0.387013	0.379376	0.295375	0.293608
GRMZM2G024293_P01	0.529175	0.522622	0.398404	0.44081	0.481564	0.487621	0.399752	0.406719
GRMZM2G131912_P01	0.478863	0.47034	0.465003	0.477374	0.457455	0.449077	0.443304	0.425249
GRMZM2G096412_P01	0.19552	0.175144	0.291412	0.280695	0.207756	0.217006	0.318875	0.313592
GRMZM5G855347_P02	0.67259	0.413907	0.63217	0.407643	0.542627	0.441854	0.491361	0.397848
GRMZM2G019090_P01	0.173518	0.187326	0.286723	0.318293	0.192708	0.201756	0.328154	0.311522
GRMZM2G157384_P01	0.526048	0.669819	0.532655	0.627321	0.452098	0.515359	0.483115	0.526919
GRMZM2G034417_P02	0.596254	0.568943	0.481476	0.495473	0.623442	0.605927	0.480719	0.4811
GRMZM2G408834_P01	0.206402	0.199664	0.366887	0.374609	0.210437	0.222823	0.373116	0.379395
GRMZM6G007923_P01	0.184535	0.242809	0.368409	0.425836	0.187315	0.213908	0.344755	0.365766
GRMZM2G108153_P01	0.178829	0.166818	0.243591	0.275576	0.175571	0.147502	0.227369	0.251411
GRMZM5G891783_P02	0.448895	0.432237	0.345159	0.331459	0.396062	0.401111	0.306759	0.338319
GRMZM2G146463_P02	0.29499	0.277586	0.227259	0.229263	0.271596	0.295245	0.199117	0.204942
GRMZM5G899349_P02	0.36589	0.35506	0.318302	0.369435	0.295589	0.28558	0.375979	0.30083
GRMZM2G137816_P01	0.443504	0.429348	0.409161	0.45218	0.417419	0.3711	0.465381	0.345241
GRMZM2G061702_P01	0.20901	0.187021	0.188538	0.182031	0.22863	0.236591	0.215556	0.21929
GRMZM2G105184_P01	0.270904	0.232326	0.34976	0.3146	0.239516	0.225048	0.341776	0.359404
GRMZM2G012942_P01	0.32808	0.310296	0.235343	0.282397	0.285989	0.344287	0.265487	0.281454
GRMZM2G131087_P07	0.412239	0.483147	0.378114	0.369677	0.497207	0.458348	0.38185	0.352751
GRMZM2G132000_P03	0.364933	0.373895	0.401424	0.426804	0.349896	0.365238	0.405533	0.312279
GRMZM5G801031_P02	0.98415	1.13854	0.33179	0.34959	1.04671	1.20734	0.297847	0.310703
GRMZM5G862931_P01	0.53592	0.501115	0.450493	0.449992	0.544187	0.527549	0.489801	0.500942
GRMZM2G414915_P01	0.456071	0.525599	0.450177	0.514234	0.429855	0.459125	0.406782	0.424823
GRMZM2G122302_P01	0.246071	0.23021	0.272019	0.270948	0.271917	0.257179	0.405684	0.379306
GRMZM2G047968_P03	0.192262	0.165999	0.2937	0.250528	0.235866	0.2108	0.320375	0.33047
GRMZM2G032910_P01	0.594285	0.722251	0.456729	0.580465	0.545471	0.529154	0.436964	0.468014
GRMZM2G102404_P01	0.830213	0.886626	0.433925	0.456207	0.759732	0.765093	0.434139	0.434066
GRMZM2G097641_P01	0.263173	0.2657	0.30666	0.299042	0.263551	0.266519	0.327769	0.340918
GRMZM2G083058_P01	0.525361	0.518926	0.444063	0.440806	0.44115	0.484579	0.416184	0.395597
GRMZM2G054387_P02	0.317948	0.288129	0.263554	0.253059	0.341066	0.31286	0.297169	0.259549
GRMZM2G008765_P01	0.517652	0.450948	0.425034	0.371147	0.4067	0.422246	0.362898	0.376708
GRMZM2G004183_P01	0.246242	0.295572	0.245073	0.299492	0.208529	0.236444	0.229486	0.239162
GRMZM2G127080_P02	0.324285	0.313214	0.261939	0.264124	0.313411	0.309863	0.276853	0.269646
GRMZM2G042008_P01	0.605105	0.789897	0.571617	0.711086	0.473547	0.557821	0.457724	0.499871
GRMZM2G061681_P02	0.557277	0.576829	0.466375	0.523645	0.49641	0.476019	0.457964	0.445482
GRMZM5G814057_P01	0.491202	0.522682	0.435084	0.481166	0.427078	0.457014	0.415687	0.436755
AC196156.3_FGP003	0.433681	0.501342	0.431254	0.489504	0.437012	0.464651	0.48898	0.420242
GRMZM2G137312_P01	0.247573	0.268325	0.253079	0.270864	0.241148	0.251479	0.246705	0.220828
GRMZM2G056539_P02	0.183629	0.188751	0.214106	0.225639	0.188238	0.202974	0.22116	0.24217
GRMZM2G106552_P01	0.11062	0.142957	0.213269	0.183654	0.135458	0.125718	0.216205	0.205453
GRMZM2G084547_P01	0.327572	0.389659	0.299829	0.348933	0.347019	0.346096	0.313532	0.294026
GRMZM2G058595_P01	0.46225	0.503212	0.439548	0.420058	0.517275	0.480546	0.429768	0.41401
GRMZM2G111501_P01	0.432985	0.352245	0.270831	0.248503	0.427469	0.373199	0.286649	0.274785
GRMZM2G465169_P02	0.248346	0.322017	0.229878	0.288195	0.204709	0.25386	0.214727	0.238267
GRMZM2G011513_P01	0.205695	0.201999	0.28667	0.314068	0.208209	0.216626	0.288504	0.278229
GRMZM2G040090_P01	0.442675	0.511781	0.328352	0.368145	0.462789	0.517891	0.337648	0.364052
GRMZM2G170137_P03	0.538234	0.583546	0.483698	0.541188	0.587141	0.585161	0.515688	0.498679
GRMZM2G132593_P03	0.604778	0.615334	0.611038	0.631517	0.666952	0.636634	0.608757	0.62499
AC199526.5_FGP003	0.540814	0.498041	0.47333	0.517981	0.502174	0.548116	0.445104	0.47444
GRMZM2G078480_P01	0.145516	0.143639	0.269149	0.252228	0.142664	0.132709	0.289891	0.290869
GRMZM2G054765_P01	0.232995	0.259679	0.286189	0.380219	0.239968	0.240838	0.332014	0.361432
GRMZM2G062396_P01	0.335537	0.478462	0.381563	0.545847	0.353024	0.40527	0.418401	0.41523
GRMZM2G170382_P02	0.417485	0.431124	0.424956	0.451059	0.412243	0.411308	0.384339	0.400819
GRMZM2G448330_P01	0.374588	0.392944	0.297967	0.296433	0.322161	0.335856	0.323069	0.323649
GRMZM2G339503_P01	0.442776	0.468303	0.526405	0.538467	0.431021	0.411824	0.426028	0.421843
GRMZM2G021794_P01	1.09677	1.6119	0.568822	0.723449	0.842512	1.00609	0.544313	0.606138
GRMZM2G180815_P01	0.292164	0.349253	0.297495	0.271197	0.301675	0.31736	0.231566	0.272625
GRMZM2G139210_P03	0.615591	0.719976	0.569737	0.601645	0.541266	0.564341	0.52402	0.530091
GRMZM2G307992_P03	0.200062	0.161414	0.278843	0.246118	0.223122	0.228646	0.33544	0.326355
GRMZM2G024159_P02	0.512562	0.667461	0.51002	0.600396	0.437769	0.535984	0.52099	0.548151
GRMZM2G165966_P01	0.326729	0.416876	0.351165	0.346867	0.307327	0.310527	0.30559	0.301586
GRMZM2G125494_P01	0.249291	0.275068	0.222007	0.259386	0.267458	0.255789	0.239733	0.231269
GRMZM2G158662_P01	0.279372	0.300177	0.288244	0.326794	0.288793	0.298228	0.28005	0.271676
GRMZM2G072415_P01	0.556363	0.536273	0.457725	0.518904	0.480394	0.481799	0.488917	0.479625
GRMZM2G155096_P03	0.356797	0.404832	0.331698	0.32628	0.334637	0.343039	0.276484	0.292899
GRMZM2G379780_P01	0.407333	0.454178	0.321728	0.279467	0.302232	0.326954	0.265878	0.308896
GRMZM2G113378_P01	0.547539	0.475184	0.375926	0.364846	0.634231	0.44459	0.38665	0.4377
GRMZM2G524711_P02	0.334146	0.393191	0.333454	0.346678	0.291733	0.345248	0.31159	0.310628
GRMZM2G384338_P01	0.242735	0.380576	0.332906	0.406493	0.204488	0.256716	0.237638	0.271781
GRMZM2G135013_P01	0.322076	0.309823	0.24505	0.252255	0.3068	0.322018	0.295511	0.2798
GRMZM2G048281_P02	0.453856	0.457101	0.390453	0.381505	0.447376	0.47478	0.358074	0.370187
GRMZM2G047298_P01	0.690292	0.742902	0.467155	0.460101	0.533562	0.607512	0.417503	0.414308
GRMZM2G024109_P01	0.368714	0.384026	0.282019	0.307165	0.342867	0.354927	0.322209	0.304739
GRMZM2G000710_P01	0.412987	0.468948	0.387601	0.447817	0.42612	0.416027	0.397448	0.376384
GRMZM2G101408_P02	0.347792	0.363202	0.357142	0.41257	0.353072	0.37085	0.433508	0.361865
GRMZM2G090300_P01	0.364734	0.414577	0.348848	0.430926	0.34719	0.385967	0.341701	0.366057
GRMZM2G073693_P01	0.133299	0.104669	0.212039	0.191903	0.143561	0.125998	0.212156	0.209708
GRMZM2G025078_P01	0.422647	0.453552	0.396428	0.433216	0.425874	0.417876	0.409859	0.373881
GRMZM2G004858_P02	0.237118	0.22769	0.235643	0.242853	0.231153	0.204108	0.297179	0.324256
GRMZM2G703928_P01	0.242395	0.271562	0.243935	0.247787	0.237177	0.279115	0.242812	0.235217
GRMZM2G019746_P02	0.282106	0.298113	0.30237	0.30395	0.274735	0.297912	0.288407	0.285741
GRMZM2G144843_P01	0.394187	0.443614	0.387141	0.449333	0.4049	0.418703	0.423548	0.411908
GRMZM5G872417_P01	0.232912	0.252872	0.216104	0.258008	0.255508	0.267948	0.274277	0.242371
GRMZM2G021704_P02	0.332689	0.375253	0.329613	0.339288	0.324361	0.336195	0.323272	0.305996
GRMZM2G178169_P01	0.360757	0.359047	0.339427	0.330076	0.311325	0.35076	0.306043	0.309231
GRMZM2G138527_P01	0.372396	0.517686	0.412128	0.530854	0.424251	0.475205	0.507035	0.427111
GRMZM2G094959_P01	0.442538	0.467825	0.408055	0.431214	0.413652	0.422353	0.358853	0.388844
GRMZM5G855200_P02	0.38485	0.437366	0.4263	0.450548	0.389679	0.39298	0.440537	0.411072
GRMZM2G094072_P01	0.573766	0.629631	0.490735	0.600253	0.533401	0.554016	0.472372	0.479158
GRMZM2G070825_P01	0.374155	0.434966	0.328572	0.330794	0.260952	0.325806	0.297466	0.313957
GRMZM2G096247_P01	0.702888	0.99063	0.558188	0.754255	0.845778	0.844464	0.74963	0.554167
GRMZM2G060001_P01	0.236174	0.259712	0.294114	0.253909	0.24277	0.230497	0.237608	0.245215
GRMZM2G024437_P01	0.274218	0.278009	0.236428	0.234514	0.256718	0.245551	0.234064	0.240499
GRMZM2G420055_P01	0.506076	0.512396	0.526935	0.529217	0.491845	0.517659	0.454176	0.461697
GRMZM2G058479_P01	0.322093	0.332166	0.33321	0.336495	0.324809	0.34616	0.344928	0.326805
GRMZM2G003734_P01	0.427327	0.455213	0.385922	0.417795	0.417188	0.425952	0.402259	0.401676
GRMZM2G446515_P05	0.4027	0.380282	0.3313	0.365865	0.397356	0.396276	0.368141	0.358081
GRMZM2G017957_P01	0.430705	0.451732	0.391876	0.395194	0.43146	0.459038	0.378988	0.39434
GRMZM2G107163_P01	0.469038	0.454367	0.449433	0.431902	0.379561	0.400268	0.371315	0.377449
GRMZM2G373175_P01	0.341877	0.341541	0.321542	0.347659	0.332251	0.326502	0.325332	0.329962
GRMZM2G053925_P01	0.373816	0.334375	0.374317	0.315751	0.324506	0.305493	0.329552	0.308857
GRMZM2G044383_P01	0.367153	0.405972	0.286509	0.334145	0.498587	0.375576	0.367159	0.364898
GRMZM2G106250_P01	0.943384	0.918241	0.485513	0.501409	0.950746	0.871098	0.498445	0.497831
GRMZM2G000326_P02	0.403374	0.532991	0.271464	0.262613	0.306959	0.334187	0.278303	0.276775
GRMZM2G166082_P02	0.425043	0.421848	0.441952	0.398311	0.414931	0.40875	0.411846	0.410653
GRMZM2G017305_P01	0.648583	0.653843	0.485518	0.545601	0.537619	0.548411	0.447848	0.465909
GRMZM2G159002_P01	0.362305	0.411138	0.286567	0.316896	0.332645	0.361947	0.283899	0.31127
GRMZM2G097605_P01	0.304534	0.330606	0.325843	0.367658	0.308579	0.350147	0.336969	0.342331
GRMZM2G174549_P01	0.219118	0.225638	0.204948	0.206256	0.211087	0.209617	0.191581	0.198422
AC234520.1_FGP005	0.498067	0.491468	0.358758	0.361593	0.442421	0.483076	0.341525	0.356425
GRMZM2G157046_P01	0.448292	0.533425	0.328181	0.407611	0.441386	0.457217	0.404103	0.313119
GRMZM2G323912_P02	0.364305	0.340905	0.240653	0.255211	0.322581	0.319993	0.245828	0.243858
GRMZM2G122199_P01	0.270556	0.25124	0.238288	0.242504	0.25228	0.27281	0.23745	0.234872
GRMZM2G051984_P02	0.476469	0.480135	0.424214	0.412661	0.523822	0.498206	0.436773	0.414387
GRMZM2G305159_P02	0.364674	0.372825	0.28125	0.293512	0.365076	0.362601	0.312222	0.314506
GRMZM2G058407_P01	0.555985	0.68786	0.521393	0.61334	0.579289	0.597553	0.571671	0.539576
GRMZM2G100260_P02	0.120492	0.120023	0.272154	0.354652	0.120246	0.133487	0.258481	0.287131
GRMZM2G079436_P01	0.287404	0.290843	0.204998	0.221091	0.285818	0.267052	0.199312	0.243483
GRMZM2G034622_P02	0.385794	0.428035	0.349654	0.346634	0.382241	0.391702	0.36719	0.348751
GRMZM2G072080_P01	0.402604	0.489802	0.37319	0.519874	0.372581	0.387254	0.38814	0.399887
GRMZM2G025470_P01	0.301265	0.315256	0.287311	0.272037	0.293202	0.32244	0.278865	0.262957
GRMZM2G034985_P01	0.295787	0.30014	0.395969	0.413327	0.291851	0.304284	0.330399	0.334909
GRMZM2G071745_P02	0.359517	0.439306	0.298496	0.399144	0.348363	0.425649	0.373494	0.356032
GRMZM2G107757_P02	0.200574	0.219207	0.198699	0.208979	0.219423	0.220772	0.206873	0.192138
GRMZM2G065908_P02	0.380578	0.44777	0.359299	0.361952	0.367938	0.377341	0.337505	0.367617
GRMZM2G045366_P01	0.259672	0.328063	0.281291	0.317615	0.264643	0.303912	0.28126	0.296878
GRMZM2G053319_P01	0.356925	0.417541	0.342666	0.441346	0.334758	0.357993	0.390774	0.357999
GRMZM2G401050_P03	0.522392	0.536251	0.450675	0.511501	0.477629	0.52262	0.47109	0.507841
GRMZM2G024976_P01	0.271884	0.236145	0.266743	0.219273	0.27253	0.238079	0.25247	0.242875
GRMZM2G015090_P02	0.515746	0.608276	0.475665	0.559084	0.536098	0.580887	0.539536	0.518041
GRMZM2G161611_P01	0.526891	0.521078	0.504386	0.499965	0.503767	0.467884	0.475784	0.500244
GRMZM2G010953_P02	0.433712	0.424419	0.385813	0.432802	0.405633	0.425638	0.418025	0.407291
GRMZM2G146553_P01	0.415804	0.378824	0.400837	0.357176	0.469483	0.444221	0.464401	0.402588
GRMZM2G380432_P01	0.267632	0.323375	0.432701	0.366699	0.308167	0.309165	0.3099	0.349027
GRMZM2G398288_P01	0.374871	0.377707	0.30435	0.292467	0.361412	0.345941	0.299329	0.310588
GRMZM2G029101_P01	0.464353	0.466781	0.425122	0.471361	0.477168	0.449812	0.462982	0.449087
GRMZM2G116902_P01	0.308694	0.326909	0.377326	0.327488	0.34204	0.350945	0.479535	0.487063
GRMZM2G076985_P01	0.299046	0.329721	0.316424	0.368308	0.233535	0.262046	0.258685	0.265569
GRMZM2G146475_P01	0.129289	0.135592	0.20948	0.280785	0.149201	0.159047	0.327808	0.275464
GRMZM2G133029_P01	0.31228	0.273644	0.214462	0.190509	0.291011	0.286054	0.204447	0.227594
GRMZM2G159678_P02	0.441439	0.441892	0.388435	0.386848	0.447118	0.453437	0.376002	0.398162
GRMZM2G103721_P01	0.241697	0.235567	0.226094	0.229723	0.276826	0.280928	0.261861	0.247304
GRMZM2G019876_P01	0.316047	0.368606	0.347093	0.355086	0.31949	0.309719	0.329484	0.321141
GRMZM2G001551_P02	0.308778	0.298444	0.289722	0.316862	0.281706	0.277906	0.281511	0.278405
GRMZM2G090018_P02	0.393884	0.344815	0.31537	0.317452	0.339043	0.336754	0.312849	0.3065
GRMZM2G080542_P01	0.456408	0.515452	0.42229	0.491477	0.415697	0.465227	0.464271	0.435845
GRMZM2G348956_P01	0.607084	0.551962	0.415163	0.419828	0.586072	0.602409	0.402212	0.41527
GRMZM2G085246_P02	0.290291	0.294726	0.252241	0.248436	0.238198	0.247105	0.197891	0.231112
GRMZM2G129860_P01	0.255835	0.266085	0.259089	0.254494	0.235557	0.242444	0.228079	0.258416
GRMZM2G098815_P03	0.330186	0.341186	0.305072	0.341906	0.333916	0.353896	0.342348	0.318158
GRMZM2G066602_P01	0.563179	0.560759	0.505818	0.475882	0.467917	0.511504	0.434397	0.480544
GRMZM2G128016_P01	0.44224	0.469598	0.40797	0.424274	0.399236	0.412865	0.382812	0.394338
GRMZM2G126170_P02	0.245366	0.236017	0.270091	0.276009	0.225689	0.245083	0.262043	0.239701
GRMZM5G892787_P01	0.279021	0.31672	0.281782	0.305125	0.280647	0.310657	0.283612	0.27577
GRMZM2G097674_P01	0.468708	0.41992	0.401526	0.384203	0.415346	0.429504	0.409321	0.404805
GRMZM2G012964_P01	0.37389	0.39019	0.352579	0.388045	0.36827	0.364686	0.37594	0.386401
GRMZM2G020574_P07	0.296451	0.269307	0.293853	0.288925	0.303605	0.28525	0.304798	0.291144
GRMZM2G386229_P01	0.264822	0.259548	0.27113	0.274031	0.218594	0.232873	0.235449	0.243554
GRMZM2G114172_P01	0.299232	0.31848	0.253451	0.27926	0.30405	0.326085	0.279458	0.273318
GRMZM2G057186_P01	0.467588	0.33511	0.396296	0.309384	0.320989	0.313622	0.282938	0.240739
GRMZM2G114706_P01	0.244687	0.339512	0.291455	0.428745	0.236139	0.241683	0.281529	0.269583
GRMZM2G149946_P03	0.292641	0.298815	0.285807	0.329955	0.28325	0.2843	0.274606	0.283959
AC205521.3_FGP003	0.374249	0.471	0.359276	0.419669	0.321688	0.358228	0.344963	0.350926
GRMZM2G087901_P01	0.597636	0.742868	0.370722	0.41973	0.933805	0.802089	0.384747	0.415071
GRMZM5G835323_P02	0.277279	0.322886	0.292251	0.30421	0.284745	0.295321	0.287592	0.26905
GRMZM2G105317_P03	0.364245	0.355916	0.338172	0.305904	0.350173	0.32156	0.320351	0.310346
GRMZM2G021624_P01	0.339374	0.342439	0.243947	0.262589	0.309164	0.302687	0.250832	0.282301
GRMZM2G456690_P01	0.377239	0.419862	0.345597	0.36052	0.385331	0.388114	0.364559	0.358779
GRMZM2G100344_P01	0.485495	0.478023	0.510857	0.544308	0.476641	0.489479	0.498336	0.516861
GRMZM2G542227_P01	0.531689	0.593204	0.298257	0.29673	0.517271	0.518148	0.280569	0.297466
GRMZM2G128131_P04	0.363882	0.3769	0.299481	0.328875	0.326613	0.362217	0.308858	0.299841
GRMZM2G135322_P02	0.296883	0.303831	0.275291	0.306962	0.301187	0.300449	0.272988	0.275741
GRMZM2G497531_P03	0.315645	0.26841	0.335016	0.294038	0.277227	0.245538	0.316004	0.281456
GRMZM2G004582_P02	0.226069	0.252954	0.244946	0.234823	0.277677	0.258925	0.259866	0.244739
GRMZM2G038606_P01	0.282686	0.329117	0.367743	0.352417	0.300555	0.364464	0.347369	0.322315
GRMZM2G111324_P01	0.235528	0.271867	0.287075	0.290759	0.211787	0.241475	0.230429	0.231081
GRMZM2G358153_P01	0.761278	0.769374	0.453585	0.556004	0.697056	0.524568	0.61456	0.623575
GRMZM2G164743_P01	0.374492	0.356828	0.308623	0.298058	0.349122	0.345735	0.315232	0.318576
GRMZM2G004468_P05	0.201172	0.208916	0.223515	0.205894	0.20102	0.209379	0.210226	0.206545
GRMZM2G024882_P01	0.470414	0.482979	0.437094	0.466879	0.469339	0.480906	0.414489	0.444566
GRMZM2G076484_P01	0.326746	0.348779	0.371217	0.441009	0.359476	0.373772	0.393207	0.385795
GRMZM2G052750_P02	0.364107	0.348902	0.302286	0.323735	0.351273	0.338902	0.316802	0.32066
GRMZM2G414844_P01	0.555104	0.481559	0.500629	0.457343	0.523026	0.516538	0.468053	0.497747
GRMZM2G071343_P02	0.282807	0.276447	0.358542	0.39134	0.412028	0.359183	0.652411	0.600575
AC208201.3_FGP001	0.548232	0.623757	0.505852	0.559608	0.524544	0.594378	0.472538	0.504424
GRMZM2G384327_P03	0.467084	0.46533	0.528808	0.483763	0.409122	0.380292	0.459789	0.472478
GRMZM2G008209_P01	0.327473	0.307299	0.254126	0.268075	0.327941	0.308364	0.254857	0.285198
GRMZM2G074393_P01	0.268139	0.306691	0.374199	0.369116	0.287829	0.368851	0.363395	0.328447
GRMZM2G074530_P01	0.363072	0.409141	0.345923	0.406528	0.350903	0.396486	0.369731	0.358217
GRMZM2G068947_P01	0.357161	0.345922	0.334367	0.35215	0.455015	0.435341	0.361184	0.35886
GRMZM2G132238_P02	0.513739	0.467373	0.268868	0.268745	0.5099	0.434683	0.26384	0.272853
GRMZM5G803949_P02	0.496644	0.49052	0.430149	0.489269	0.442226	0.449956	0.423298	0.444604
GRMZM2G381059_P03	0.280929	0.321405	0.292245	0.32247	0.275942	0.30593	0.267366	0.267047
GRMZM5G861064_P01	0.34092	0.339859	0.345553	0.357745	0.319464	0.32601	0.304032	0.333084
GRMZM2G062354_P01	0.295126	0.303032	0.288335	0.294895	0.292128	0.293741	0.271807	0.294269
GRMZM2G093815_P01	0.431193	0.49685	0.423572	0.493414	0.458211	0.46863	0.458479	0.436318
GRMZM2G384780_P01	0.499747	0.472844	0.491464	0.492694	0.524766	0.500435	0.511172	0.506876
GRMZM2G031138_P01	0.437504	0.389329	0.371617	0.379407	0.551056	0.438814	0.382793	0.382814
GRMZM2G426591_P01	0.522709	0.513884	0.447008	0.446263	0.451969	0.437189	0.418262	0.429382
GRMZM2G105283_P01	0.224301	0.225969	0.188395	0.198852	0.217905	0.220146	0.193634	0.197465
GRMZM2G351074_P01	0.214148	0.200978	0.193608	0.181467	0.233427	0.224446	0.207984	0.210608
GRMZM2G047097_P01	0.462557	0.493054	0.432853	0.451737	0.466219	0.459452	0.443501	0.457294
GRMZM2G311003_P01	0.437302	0.456219	0.356168	0.411591	0.452293	0.451107	0.390492	0.37816
GRMZM2G010315_P01	0.586969	0.616866	0.615945	0.633073	0.62472	0.610953	0.659	0.652474
GRMZM2G002391_P02	0.510244	0.473018	0.460099	0.434116	0.457643	0.441353	0.433068	0.457126
GRMZM6G101378_P01	0.308343	0.227448	0.353318	0.263013	0.321348	0.261742	0.328191	0.269931
GRMZM6G191662_P01	0.384019	0.466324	0.402036	0.444258	0.396044	0.3933	0.447394	0.399958
GRMZM2G042313_P01	0.612461	0.515153	0.458676	0.428084	0.49175	0.519146	0.481351	0.493379
GRMZM2G065210_P05	0.452841	0.486288	0.428849	0.454387	0.477268	0.465674	0.452853	0.448506
GRMZM2G005583_P01	0.33139	0.368642	0.32266	0.364659	0.296676	0.319405	0.326901	0.336334
GRMZM2G050714_P01	0.503412	0.626579	0.565403	0.621124	0.518595	0.602432	0.620301	0.608821
GRMZM2G439884_P01	0.38914	0.399674	0.377079	0.381246	0.334616	0.367624	0.360222	0.390399
GRMZM2G061234_P01	0.207722	0.208649	0.192397	0.206562	0.213123	0.225203	0.210134	0.202877
GRMZM2G077708_P01	0.339854	0.424683	0.340574	0.447028	0.332389	0.378816	0.364346	0.37231
GRMZM2G088397_P01	0.227768	0.240353	0.214041	0.258019	0.259878	0.275227	0.278776	0.245938
GRMZM2G005082_P02	0.4198	0.453983	0.436925	0.473973	0.356464	0.406672	0.381882	0.403635
GRMZM2G048703_P02	0.326513	0.373933	0.301065	0.368989	0.329875	0.31944	0.334874	0.311977
GRMZM2G044460_P01	0.341646	0.302643	0.344086	0.311712	0.348484	0.337612	0.330384	0.350099
GRMZM2G361220_P01	0.446075	0.49402	0.42052	0.522096	0.41697	0.460819	0.445824	0.460343
GRMZM2G100716_P05	0.598759	0.540725	0.559606	0.544812	0.634763	0.60552	0.603497	0.578985
GRMZM2G010056_P03	0.59626	0.733637	0.640843	0.800407	0.608604	0.66899	0.62419	0.660402
GRMZM2G100579_P01	0.356079	0.387473	0.3785	0.391576	0.381631	0.358107	0.379992	0.366641
GRMZM2G061442_P01	0.320914	0.34483	0.375343	0.470718	0.34547	0.330412	0.432176	0.380137
GRMZM2G118363_P01	0.596743	0.573148	0.555173	0.54486	0.633483	0.636898	0.567021	0.55934
GRMZM2G158562_P01	0.44068	0.455565	0.360454	0.388409	0.475727	0.455667	0.377657	0.379174
GRMZM2G142806_P01	0.511334	0.592266	0.498564	0.580613	0.539495	0.545382	0.544219	0.521459
GRMZM2G014813_P02	0.326005	0.335753	0.358969	0.326842	0.33015	0.330436	0.318566	0.339945
GRMZM2G013450_P02	0.363862	0.457004	0.384388	0.50072	0.389052	0.405176	0.427474	0.405659
GRMZM2G144635_P01	0.287626	0.300102	0.329914	0.368874	0.314295	0.33361	0.378284	0.353962
GRMZM5G893444_P01	0.358268	0.359663	0.25979	0.302052	0.376934	0.353834	0.332048	0.324078
GRMZM2G066219_P01	0.331321	0.374923	0.343714	0.411961	0.26386	0.2956	0.312889	0.332399
GRMZM2G136058_P01	0.313056	0.367248	0.330405	0.35472	0.312165	0.320774	0.333221	0.335077
GRMZM2G077596_P01	0.470415	0.602602	0.469292	0.597119	0.427296	0.467699	0.47785	0.487726
GRMZM2G457534_P01	0.405447	0.485963	0.460331	0.511929	0.401998	0.472663	0.455816	0.472518
GRMZM2G031501_P05	0.463442	0.427628	0.630244	0.423249	0.416257	0.389513	0.489758	0.426576
AC209987.4_FGP010	0.413765	0.320775	0.268017	0.252783	0.441984	0.330707	0.327125	0.311511
AC202974.3_FGP004	0.332929	0.365431	0.323227	0.329633	0.335425	0.332003	0.326437	0.321582
GRMZM2G304700_P01	0.472457	0.464786	0.394723	0.421312	0.510594	0.514628	0.445742	0.442424
GRMZM2G174669_P03	0.380906	0.393914	0.34772	0.404573	0.361762	0.389101	0.364258	0.357766
GRMZM2G302604_P01	0.293025	0.328797	0.296434	0.311182	0.259562	0.269096	0.27961	0.295628
GRMZM2G458728_P02	0.511076	0.395915	0.483044	0.427336	0.518552	0.387219	0.516333	0.427191
GRMZM2G385338_P01	0.267296	0.29009	0.283577	0.306648	0.274286	0.304877	0.307623	0.298935
GRMZM2G094273_P01	0.233135	0.220012	0.422461	0.400585	0.247752	0.245521	0.449438	0.447762
GRMZM2G060952_P01	0.43756	0.486763	0.511807	0.592167	0.446981	0.48357	0.532104	0.509048
GRMZM2G304212_P01	0.427823	0.415376	0.447824	0.423789	0.423188	0.372412	0.404001	0.41892
GRMZM2G093855_P01	0.402383	0.381053	0.360134	0.357837	0.374231	0.42217	0.342243	0.359949
GRMZM5G829554_P02	0.372597	0.435465	0.309949	0.381254	0.379746	0.395425	0.34951	0.376055
GRMZM6G220418_P01	0.182471	0.232171	0.204805	0.223331	0.211055	0.213896	0.194594	0.204344
GRMZM2G090469_P01	0.453377	0.414775	0.452671	0.431961	0.475513	0.458257	0.501704	0.478408
GRMZM2G157034_P02	0.432109	0.431518	0.438171	0.445108	0.389898	0.382255	0.385989	0.428286
GRMZM2G071360_P01	0.195014	0.251867	0.202329	0.271506	0.160937	0.19955	0.183445	0.202017
GRMZM2G017991_P01	0.345027	0.370065	0.368112	0.460603	0.34568	0.354394	0.376706	0.379414
GRMZM2G175952_P01	0.459701	0.462982	0.436911	0.458213	0.458996	0.467631	0.460545	0.461688
GRMZM2G046924_P02	2.17346	1.86548	1.05008	0.924774	1.89253	1.94335	0.869483	0.94751
GRMZM2G010048_P01	0.27423	0.293145	0.272034	0.301742	0.17929	0.210417	0.217116	0.252025
GRMZM2G469795_P01	0.694046	0.702463	0.705578	0.721227	0.667916	0.711423	0.734952	0.729062
GRMZM2G156174_P01	0.496199	0.500116	0.512832	0.507758	0.497356	0.477027	0.493768	0.514943
GRMZM2G063473_P01	0.315888	0.323758	0.320244	0.331452	0.329309	0.35676	0.338039	0.351216
GRMZM2G481163_P01	0.443919	0.427674	0.415998	0.411735	0.407358	0.404618	0.404853	0.417177
GRMZM2G042173_P01	0.453403	0.427045	0.394548	0.368108	0.463704	0.440908	0.384673	0.400944
GRMZM2G057026_P01	0.217981	0.217488	0.263238	0.265926	0.241351	0.27077	0.266939	0.256307
GRMZM2G065076_P02	0.389081	0.415479	0.405754	0.452105	0.389667	0.427527	0.430013	0.423708
GRMZM2G144367_P01	0.396345	0.402204	0.340292	0.398033	0.374706	0.352976	0.358964	0.376481
GRMZM2G124239_P01	0.303276	0.357434	0.289915	0.390005	0.314543	0.342003	0.333953	0.335538
GRMZM2G137724_P01	0.372825	0.405251	0.321	0.366666	0.404156	0.39882	0.371675	0.359607
GRMZM2G015067_P01	0.453327	0.480111	0.408625	0.458895	0.45917	0.481095	0.46775	0.457695
GRMZM2G137891_P02	0.501565	0.491348	0.505217	0.476541	0.519462	0.535539	0.503498	0.46683
GRMZM2G140342_P01	0.33386	0.446816	0.402481	0.506919	0.2663	0.312134	0.35294	0.37855
GRMZM2G157332_P01	0.521397	0.562544	0.512393	0.601937	0.529979	0.543638	0.539252	0.522194
GRMZM2G324705_P01	0.316176	0.345265	0.351712	0.405739	0.266802	0.312132	0.335893	0.332946
GRMZM2G093104_P02	0.370923	0.37502	0.365899	0.371739	0.37908	0.383791	0.366289	0.38726
GRMZM2G142777_P01	0.575666	0.617188	0.356596	0.364851	0.523426	0.544331	0.32888	0.355729
GRMZM2G111200_P01	0.70918	0.65008	0.48565	0.470795	0.842063	0.729815	0.643834	0.468583
GRMZM2G322186_P02	0.505348	0.51811	0.469735	0.529566	0.487303	0.505056	0.490754	0.494127
GRMZM2G023242_P04	0.192946	0.245489	0.274461	0.353104	0.201673	0.220646	0.269346	0.242334
GRMZM2G135089_P01	0.465318	0.503644	0.416222	0.484396	0.429341	0.48278	0.426273	0.458692
GRMZM2G582965_P01	0.361022	0.388743	0.419006	0.396722	0.36862	0.339798	0.362629	0.36346
GRMZM2G415791_P01	0.423855	0.426276	0.427252	0.417525	0.392446	0.410538	0.411311	0.424131
GRMZM2G105297_P01	0.323396	0.361781	0.368475	0.351553	0.301246	0.323544	0.313259	0.323413
GRMZM2G091228_P01	0.353758	0.351828	0.385415	0.370161	0.386622	0.380846	0.378448	0.392922
GRMZM2G113232_P01	0.482797	0.445554	0.450477	0.468081	0.43668	0.437671	0.46654	0.478867
GRMZM2G035922_P01	0.35207	0.381425	0.36526	0.382116	0.362266	0.374001	0.392903	0.389958
GRMZM2G079658_P02	0.2732	0.27083	0.341829	0.332848	0.258785	0.250355	0.293174	0.312312
GRMZM2G055520_P01	0.294769	0.292526	0.303233	0.294626	0.278393	0.293297	0.29094	0.28555
GRMZM2G031536_P01	0.449465	0.567164	0.349679	0.527197	0.466954	0.445188	0.420572	0.440447
GRMZM2G065480_P01	0.469148	0.463062	0.467971	0.480836	0.427358	0.480862	0.43519	0.442239
GRMZM2G042758_P01	0.410181	0.370712	0.439975	0.452277	0.424511	0.385772	0.420918	0.428987
GRMZM2G179518_P01	0.444669	0.463811	0.495129	0.505494	0.437244	0.436278	0.445738	0.438303
GRMZM2G049342_P01	0.43432	0.481058	0.423518	0.479212	0.444307	0.473006	0.463564	0.467681
GRMZM2G119483_P01	0.238199	0.278753	0.251518	0.281682	0.241093	0.229342	0.23252	0.246892
GRMZM2G135300_P01	0.252877	0.265361	0.234135	0.234199	0.254254	0.260236	0.243421	0.255517
GRMZM2G469162_P01	0.430445	0.399838	0.457889	0.423617	0.411642	0.396838	0.390238	0.422826
GRMZM2G157564_P02	0.594947	0.776121	0.579052	0.753585	0.53572	0.585543	0.571741	0.603291
GRMZM2G012326_P01	0.36027	0.381544	0.342132	0.398988	0.353957	0.402156	0.382349	0.378604
GRMZM2G040618_P01	0.276951	0.280513	0.305559	0.307881	0.277551	0.273331	0.315643	0.295904
GRMZM2G143788_P01	0.437113	0.525246	0.486111	0.41195	0.480251	0.526921	0.431899	0.367175
GRMZM2G127963_P01	0.273103	0.396978	0.278424	0.358964	0.255129	0.248968	0.255483	0.266284
GRMZM2G126656_P01	0.421396	0.425291	0.497875	0.517592	0.413535	0.416249	0.48854	0.486188
GRMZM2G129444_P01	0.401383	0.437439	0.39194	0.433297	0.41617	0.435483	0.410748	0.406873
GRMZM2G026311_P02	0.248732	0.259975	0.23659	0.25573	0.2454	0.240418	0.257126	0.25603
GRMZM2G067028_P01	0.316767	0.314474	0.320778	0.326651	0.345915	0.363648	0.349293	0.32914
GRMZM2G416426_P01	0.274366	0.281007	0.294768	0.32285	0.258867	0.26435	0.304545	0.33258
GRMZM2G171452_P01	0.327483	0.44825	0.374092	0.44918	0.3404	0.363264	0.35954	0.33779
GRMZM2G087435_P01	0.345769	0.312791	0.334108	0.344351	0.346776	0.347856	0.296146	0.33887
GRMZM2G060669_P05	0.436679	0.474669	0.441836	0.501926	0.427143	0.439758	0.476049	0.468607
GRMZM2G114107_P01	0.295029	0.315766	0.308826	0.293103	0.269628	0.285475	0.280224	0.285282
GRMZM5G879527_P04	0.338636	0.29264	0.322186	0.275085	0.282971	0.265386	0.259453	0.296977
GRMZM2G093272_P01	0.38271	0.52688	0.295533	0.351811	0.407507	0.43145	0.308403	0.295706
GRMZM2G064605_P01	0.205435	0.221253	0.237478	0.248284	0.160448	0.190215	0.195839	0.207715
GRMZM2G050890_P02	0.297724	0.294525	0.275226	0.280589	0.297516	0.306474	0.284581	0.296698
GRMZM2G178319_P01	0.342918	0.346095	0.343724	0.34053	0.302377	0.3283	0.327568	0.335156
GRMZM2G049538_P01	0.492835	0.551591	0.472857	0.511605	0.428408	0.489652	0.52481	0.528242
AC199705.3_FGP008	0.345349	0.318866	0.331182	0.308645	0.354706	0.335662	0.340174	0.332082
GRMZM2G075336_P02	0.405975	0.407114	0.440625	0.442373	0.391904	0.384352	0.440414	0.420576
GRMZM2G083374_P01	0.527372	0.499515	0.484178	0.478078	0.538672	0.512073	0.482425	0.477688
GRMZM2G145666_P01	0.418305	0.409093	0.434475	0.452285	0.390756	0.390087	0.408114	0.430219
GRMZM2G029400_P01	0.353941	0.349494	0.319402	0.342561	0.312141	0.328954	0.316862	0.343312
GRMZM2G131026_P01	0.310039	0.374155	0.330269	0.436555	0.268231	0.272699	0.322504	0.352215
GRMZM2G071768_P02	0.411366	0.423077	0.430491	0.452229	0.387064	0.386275	0.415631	0.4272
GRMZM2G167836_P02	0.37324	0.420276	0.352775	0.397284	0.376296	0.363134	0.348946	0.368049
GRMZM2G173636_P02	0.333632	0.383318	0.371706	0.413241	0.340125	0.373761	0.401397	0.38282
AC190909.3_FGP004	0.664447	0.624654	0.496388	0.561678	0.654952	0.666189	0.675454	0.65624
GRMZM2G103939_P01	0.451901	0.443018	0.417484	0.420738	0.396492	0.431304	0.357423	0.414973
GRMZM2G125784_P01	0.226695	0.259866	0.262981	0.27727	0.232758	0.253576	0.242749	0.244106
GRMZM2G175718_P01	0.389834	0.40566	0.459358	0.444288	0.407217	0.367504	0.439373	0.4201
GRMZM2G457381_P01	0.49976	0.574934	0.494463	0.558452	0.436496	0.475606	0.476477	0.483813
GRMZM2G162786_P01	0.237265	0.196558	0.210684	0.174925	0.214922	0.200391	0.23601	0.195911
GRMZM2G126285_P02	0.290281	0.33129	0.313448	0.370057	0.324628	0.323449	0.352786	0.360727
GRMZM5G849223_P01	0.32754	0.380986	0.319797	0.371219	0.307205	0.320233	0.314071	0.325616
GRMZM2G330690_P02	0.457132	0.458488	0.451616	0.461098	0.463483	0.45927	0.454627	0.460952
GRMZM2G035651_P01	0.300247	0.348378	0.251667	0.309845	0.261722	0.312899	0.266572	0.282003
GRMZM2G049055_P01	0.249518	0.273743	0.256277	0.271637	0.225281	0.231079	0.238784	0.253682
GRMZM2G071166_P03	0.429017	0.389783	0.431699	0.402871	0.422093	0.429474	0.43023	0.398166
GRMZM2G409627_P01	0.372697	0.412854	0.418175	0.465855	0.367037	0.384422	0.456128	0.456164
GRMZM2G172098_P01	0.395694	0.418632	0.401031	0.429852	0.420753	0.418685	0.417632	0.431055
GRMZM2G043724_P01	0.433522	0.490217	0.431253	0.486334	0.441256	0.466945	0.466931	0.450208
GRMZM2G043663_P01	0.286356	0.291121	0.290673	0.267485	0.298888	0.302474	0.296424	0.299913
GRMZM2G116670_P02	0.313799	0.263319	0.320735	0.292068	0.251948	0.259286	0.334444	0.297734
GRMZM2G026523_P01	0.308028	0.305068	0.282829	0.292816	0.27587	0.299143	0.280792	0.288788
GRMZM2G079908_P01	0.361572	0.457595	0.603712	0.632654	0.404616	0.404262	0.63723	0.498359
AC217050.4_FGP001	0.36304	0.371116	0.391972	0.410265	0.342696	0.361655	0.376199	0.383057
GRMZM2G150541_P01	0.334883	0.356304	0.304767	0.33133	0.341322	0.32677	0.332901	0.33839
GRMZM2G056431_P01	0.246531	0.271916	0.375244	0.409638	0.312555	0.361392	0.344177	0.345215
GRMZM2G062076_P02	0.236272	0.230926	0.5275	0.31813	0.242106	0.337163	0.44238	0.332191
GRMZM2G124911_P01	0.350666	0.338243	0.298816	0.30242	0.349909	0.369462	0.330601	0.32655
GRMZM2G021129_P01	0.419894	0.415668	0.429494	0.456959	0.392097	0.406211	0.399817	0.413193
GRMZM2G473367_P01	0.49138	0.531569	0.516059	0.54104	0.465261	0.462812	0.493476	0.498403
GRMZM2G439589_P01	0.340031	0.308597	0.375842	0.319636	0.34261	0.304399	0.334494	0.341058
GRMZM5G807602_P01	0.433861	0.365028	0.353971	0.361415	0.395277	0.368057	0.347863	0.374528
GRMZM2G174137_P01	0.29311	0.323671	0.26859	0.319034	0.282774	0.296637	0.265761	0.283757
GRMZM2G091558_P01	0.569981	0.605526	0.594086	0.622346	0.566823	0.51878	0.597729	0.591396
GRMZM2G120373_P01	0.261177	0.246184	0.257076	0.251598	0.242771	0.242669	0.244229	0.254296
GRMZM2G123886_P01	0.446166	0.388822	0.506831	0.497774	0.436058	0.424245	0.483063	0.483706
GRMZM6G514393_P01	0.570823	0.565805	0.338889	0.33438	0.434475	0.405698	0.312496	0.370766
GRMZM2G091503_P04	0.473687	0.464656	0.379117	0.406328	0.426755	0.42625	0.378308	0.378232
GRMZM2G412604_P01	0.338556	0.356169	0.364335	0.354431	0.455854	0.354501	0.405104	0.371049
GRMZM2G078887_P01	0.404467	0.484224	0.378794	0.388728	0.440407	0.44201	0.391495	0.403208
GRMZM2G371271_P01	0.302562	0.298884	0.377439	0.407845	0.349208	0.308854	0.489872	0.465335
GRMZM2G070167_P01	0.43704	0.298987	0.651367	0.392189	0.622215	0.475955	0.595618	0.52663
GRMZM2G069382_P01	0.473024	0.370396	0.342052	0.301734	0.551738	0.430254	0.43225	0.431886
GRMZM2G416632_P01	0.265032	0.282309	0.202549	0.212117	0.24941	0.234861	0.286166	0.267555
GRMZM2G084134_P01	0.379921	0.371185	0.373977	0.373809	0.371892	0.371646	0.376264	0.381306
GRMZM2G012901_P01	0.349724	0.310778	0.345683	0.373282	0.296341	0.306048	0.336998	0.347812
GRMZM2G047178_P01	0.447066	0.451432	0.430288	0.403168	0.428402	0.399912	0.369595	0.403471
GRMZM2G074015_P02	0.462701	0.469507	0.480601	0.493016	0.420843	0.433542	0.434111	0.472344
GRMZM2G342386_P02	0.184323	0.197903	0.194755	0.221018	0.215987	0.209709	0.230838	0.212134
GRMZM2G088299_P01	0.385758	0.393088	0.348961	0.372216	0.366882	0.402798	0.366294	0.364003
GRMZM2G148115_P01	0.442995	0.415645	0.416565	0.433397	0.432901	0.386038	0.395193	0.410599
GRMZM2G055141_P01	0.226239	0.203882	0.189843	0.193567	0.220531	0.222525	0.200629	0.209452
GRMZM2G053210_P01	0.398241	0.457394	0.430622	0.404499	0.392388	0.442788	0.379762	0.42764
GRMZM2G176662_P01	0.317213	0.366069	0.319434	0.393303	0.287292	0.334102	0.313414	0.33584
GRMZM2G031846_P01	0.395249	0.44247	0.416586	0.453765	0.373959	0.425154	0.390369	0.435782
GRMZM2G527891_P01	0.493639	0.428856	0.478672	0.464304	0.43522	0.428965	0.449658	0.487352
GRMZM2G004087_P01	0.367407	0.364822	0.381664	0.362041	0.377876	0.386442	0.386005	0.373743
GRMZM2G121123_P01	0.312263	0.343503	0.339822	0.35806	0.315688	0.327195	0.316763	0.353373
GRMZM2G164378_P01	0.341975	0.287446	0.449446	0.365502	0.361012	0.321664	0.462579	0.410376
GRMZM2G412150_P01	0.38161	0.384448	0.386891	0.383926	0.360193	0.357639	0.363525	0.381768
GRMZM5G803318_P03	0.161964	0.219551	0.249651	0.211554	0.189453	0.230888	0.200092	0.203515
GRMZM2G477694_P01	0.556164	0.49079	0.610739	0.550033	0.530506	0.483309	0.528164	0.583629
GRMZM2G147726_P01	0.453137	0.484075	0.414081	0.548882	0.414515	0.442895	0.436513	0.472567
GRMZM2G067789_P01	0.485308	0.410492	0.392587	0.369886	0.453581	0.426769	0.400437	0.394274
GRMZM2G113453_P01	0.731688	0.653667	0.695381	0.678118	0.767908	0.716212	0.720877	0.702815
GRMZM2G042807_P01	0.54602	0.580688	0.552556	0.56279	0.493395	0.523164	0.526871	0.547849
GRMZM2G158197_P01	0.242384	0.255257	0.251676	0.25774	0.255999	0.247971	0.239368	0.249606
GRMZM2G078656_P01	0.469392	0.446642	0.491929	0.472639	0.447631	0.426989	0.437374	0.474071
GRMZM2G052416_P01	0.378891	0.388684	0.453648	0.410572	0.393092	0.421117	0.44482	0.44251
GRMZM2G013283_P01	0.605418	0.588071	0.361562	0.397633	0.569898	0.628541	0.427443	0.421434
GRMZM2G034043_P01	0.338272	0.389965	0.37162	0.428719	0.32851	0.357182	0.405327	0.380404
GRMZM5G841914_P01	0.51737	0.513552	0.491456	0.519643	0.464657	0.490998	0.50066	0.501664
GRMZM2G080176_P01	0.348757	0.387414	0.371529	0.427227	0.342249	0.348596	0.385789	0.388439
GRMZM2G077079_P01	0.512111	0.645098	0.474824	0.482579	0.483204	0.489091	0.465374	0.447719
GRMZM2G455687_P01	0.327723	0.335627	0.374454	0.32739	0.316241	0.318794	0.334941	0.331495
GRMZM2G427337_P01	0.475898	0.502347	0.481738	0.484629	0.501297	0.555883	0.50483	0.493377
GRMZM2G101533_P01	0.480933	0.433699	0.460279	0.440398	0.464479	0.45682	0.462678	0.467381
GRMZM2G412085_P01	0.428966	0.393343	0.463873	0.417714	0.397986	0.393937	0.408772	0.428742
GRMZM5G832651_P01	0.539902	0.538567	0.537195	0.576093	0.507276	0.533281	0.55158	0.549439
GRMZM2G019991_P01	0.546891	0.552419	0.551087	0.594888	0.486107	0.527541	0.512865	0.561534
GRMZM2G088828_P01	0.250307	0.290483	0.275963	0.320783	0.292438	0.2964	0.300091	0.306868
AC187157.4_FGP002	0.278756	0.265712	0.269119	0.284968	0.305845	0.292275	0.325303	0.311356
GRMZM2G057075_P01	0.239558	0.237917	0.2417	0.261537	0.265176	0.233152	0.259762	0.261199
GRMZM2G124974_P02	0.318486	0.342543	0.372058	0.40939	0.370834	0.368025	0.397827	0.420839
GRMZM2G166701_P01	0.354245	0.335707	0.337305	0.314362	0.332911	0.320098	0.319508	0.35253
GRMZM2G477694_P03	0.32366	0.32663	0.353369	0.364215	0.303875	0.31346	0.342306	0.339151
GRMZM2G316191_P01	0.24505	0.232996	0.244921	0.262832	0.246242	0.261606	0.242181	0.264171
GRMZM2G179633_P01	0.22471	0.263763	0.232278	0.273233	0.247857	0.247041	0.251089	0.26003
GRMZM2G337616_P01	0.315622	0.301113	0.29112	0.28197	0.288048	0.270606	0.301151	0.283704
GRMZM5G881296_P01	0.417462	0.440427	0.417469	0.44173	0.390723	0.394054	0.403033	0.428435
GRMZM2G171987_P01	0.464802	0.488355	0.445175	0.497222	0.435843	0.42716	0.442263	0.465845
GRMZM2G147623_P02	0.445616	0.457545	0.498559	0.501411	0.37746	0.381411	0.525775	0.478888
GRMZM2G041028_P01	0.248965	0.289104	0.289632	0.30399	0.282672	0.309486	0.317245	0.292238
GRMZM2G070305_P01	0.400616	0.399098	0.428442	0.412051	0.398429	0.393874	0.456537	0.444286
GRMZM2G133652_P01	0.469478	0.481682	0.485503	0.525867	0.473165	0.493601	0.530615	0.540088
GRMZM2G102314_P01	0.351759	0.352907	0.385541	0.401464	0.369994	0.354779	0.375706	0.40785
GRMZM5G827266_P03	0.366892	0.431226	0.459345	0.518803	0.356204	0.386268	0.387318	0.427277
GRMZM2G121262_P01	0.322987	0.400216	0.327153	0.414768	0.346637	0.374515	0.417265	0.396459
GRMZM2G019450_P03	0.300129	0.328665	0.374147	0.386725	0.282026	0.307009	0.333979	0.353986
GRMZM2G006107_P01	0.321237	0.334941	0.281782	0.292545	0.265598	0.288797	0.269918	0.278515
GRMZM2G177771_P01	0.2867	0.302783	0.28614	0.32324	0.274556	0.274575	0.279183	0.306157
GRMZM2G067727_P01	0.465807	0.441077	0.471239	0.43034	0.46785	0.445121	0.474219	0.471014
GRMZM2G148985_P02	0.337451	0.369842	0.413681	0.398588	0.359969	0.368459	0.36609	0.38592
GRMZM2G301071_P01	0.384728	0.39122	0.400221	0.39426	0.338062	0.339243	0.363701	0.388564
AC234159.1_FGP002	0.403151	0.370272	0.442601	0.43958	0.429325	0.392176	0.419961	0.436267
GRMZM2G012030_P01	0.416268	0.420335	0.451327	0.477438	0.428637	0.463818	0.533508	0.475335
GRMZM2G314546_P01	0.413925	0.421175	0.398238	0.412301	0.402861	0.402832	0.436987	0.445015
GRMZM2G126517_P01	0.487396	0.497119	0.530809	0.507711	0.482541	0.469104	0.502017	0.523304
GRMZM2G169320_P01	0.380781	0.399162	0.433844	0.500107	0.369944	0.381658	0.431048	0.436789
GRMZM2G405690_P01	0.275949	0.278183	0.304116	0.305018	0.276608	0.292786	0.295894	0.304779
AC217271.3_FGP002	0.296635	0.31311	0.371117	0.348793	0.31525	0.335074	0.333256	0.353432
GRMZM6G847892_P02	0.312826	0.370338	0.372547	0.466069	0.317073	0.394845	0.375324	0.390978
GRMZM2G327635_P01	0.411688	0.43285	0.412902	0.468744	0.376768	0.382557	0.412432	0.435391
GRMZM2G003853_P01	0.223809	0.286254	0.242907	0.295536	0.201693	0.224416	0.257617	0.267768
GRMZM2G378604_P01	0.279851	0.276611	0.307988	0.288324	0.279201	0.279739	0.302237	0.319383
GRMZM2G159221_P01	0.292194	0.292713	0.293469	0.291887	0.284685	0.26934	0.284212	0.324833
GRMZM2G105364_P01	0.200159	0.263223	0.324099	0.345388	0.163113	0.210807	0.238263	0.254949
GRMZM2G037280_P01	0.25627	0.264631	0.239534	0.242273	0.253264	0.263213	0.234704	0.246112
GRMZM5G880508_P01	0.319913	0.326138	0.327716	0.328996	0.344332	0.331328	0.348224	0.340019
GRMZM2G087137_P02	0.298233	0.29226	0.294864	0.284351	0.282375	0.290385	0.291101	0.299765
GRMZM2G063431_P01	0.109969	0.123222	0.450416	0.223969	0.210028	0.115296	0.38081	0.386291
GRMZM2G091302_P03	0.507441	0.513549	0.518912	0.522772	0.474191	0.468687	0.48193	0.512519
GRMZM2G464000_P02	0.563423	0.529528	0.537608	0.544265	0.52357	0.525637	0.551305	0.557997
GRMZM2G004959_P01	0.320305	0.391796	0.407289	0.482972	0.310548	0.313646	0.35634	0.417103
GRMZM2G150256_P01	0.47268	0.460907	0.494674	0.447977	0.424817	0.419362	0.459719	0.486531
GRMZM2G372475_P01	0.30109	0.281486	0.367318	0.364372	0.294091	0.313144	0.364794	0.380372
GRMZM2G045421_P01	0.477074	0.423547	0.449545	0.466629	0.434683	0.427611	0.49405	0.493527
GRMZM2G090824_P01	0.294415	0.272709	0.314299	0.280253	0.263691	0.282244	0.312305	0.313417
GRMZM2G173354_P02	0.308457	0.304396	0.341047	0.354708	0.301553	0.318882	0.367391	0.370234
GRMZM2G030880_P01	0.408946	0.350451	0.416013	0.384945	0.424764	0.462344	0.468817	0.417055
GRMZM2G043056_P02	0.297481	0.300169	0.307232	0.305211	0.265502	0.275945	0.277686	0.304108
GRMZM2G143646_P02	0.300811	0.339295	0.33056	0.358698	0.320918	0.351209	0.311056	0.354121
GRMZM2G093197_P01	0.301892	0.306147	0.367552	0.390326	0.286864	0.286663	0.368115	0.359106
GRMZM2G051311_P01	0.327903	0.313956	0.297724	0.339951	0.343119	0.338338	0.359511	0.346165
GRMZM2G133396_P01	0.424509	0.400096	0.410835	0.434145	0.402064	0.394163	0.417445	0.450077
GRMZM5G883025_P01	0.26562	0.263154	0.290757	0.342728	0.279012	0.269684	0.306059	0.316319
GRMZM2G025182_P01	0.3096	0.295461	0.394175	0.402552	0.269186	0.2949	0.337032	0.363761
GRMZM2G135808_P01	0.305118	0.32193	0.356868	0.349952	0.294867	0.314277	0.354832	0.368824
GRMZM6G706391_P01	0.602766	0.472228	0.525679	0.53498	0.628861	0.554156	0.516172	0.498491
GRMZM2G062914_P03	0.337394	0.397364	0.33735	0.43162	0.356179	0.358107	0.391525	0.39046
GRMZM2G429241_P01	0.439057	0.457198	0.479945	0.512187	0.413073	0.409473	0.463935	0.491797
GRMZM2G106140_P01	0.711321	0.624239	0.672348	0.684209	0.645089	0.603548	0.677483	0.715096
GRMZM2G150648_P01	0.415744	0.422058	0.464307	0.436333	0.489573	0.472034	0.469117	0.497499
AC235546.1_FGP001	0.528022	0.54651	0.524323	0.567379	0.534914	0.524485	0.55183	0.55587
GRMZM2G128865_P01	0.478411	0.506489	0.584086	0.639169	0.456139	0.463772	0.595086	0.610183
GRMZM2G140996_P01	0.674701	0.751644	0.463786	0.528033	0.631747	0.673796	0.475484	0.467475
AC217499.3_FGP003	0.288264	0.378333	0.40861	0.419976	0.257699	0.361146	0.490877	0.395095
GRMZM2G003897_P01	0.268431	0.298642	0.351941	0.453669	0.287427	0.276656	0.383062	0.346839
GRMZM2G374084_P01	0.305782	0.328173	0.374435	0.36066	0.298129	0.311271	0.344479	0.343736
GRMZM2G059299_P01	0.231165	0.239262	0.25982	0.254964	0.25227	0.243649	0.256207	0.262662
GRMZM2G106412_P01	0.386687	0.444851	0.473575	0.562835	0.398415	0.416433	0.485565	0.498306
GRMZM2G080503_P01	0.350093	0.344636	0.409117	0.401928	0.355639	0.346614	0.387785	0.404189
GRMZM2G465833_P01	0.42018	0.414257	0.434376	0.445635	0.398641	0.398201	0.400095	0.421947
GRMZM2G014170_P01	0.740828	0.64748	0.673289	0.532183	0.70366	0.687239	0.700581	0.648074
GRMZM2G117989_P02	0.420407	0.532146	0.258635	0.277291	0.331493	0.318305	0.25152	0.27687
GRMZM2G082823_P01	0.395331	0.353198	0.438324	0.347214	0.394889	0.362497	0.344905	0.363641
GRMZM2G341253_P01	0.258664	0.312278	0.316219	0.321508	0.244444	0.26111	0.304854	0.314257
GRMZM2G015861_P02	0.334752	0.360281	0.362918	0.422483	0.343083	0.366191	0.40876	0.401532
GRMZM2G368799_P01	0.325626	0.354135	0.42539	0.42653	0.332422	0.32444	0.408904	0.402552
GRMZM2G159849_P01	0.47068	0.496497	0.496993	0.525317	0.476493	0.470433	0.526921	0.536667
GRMZM2G045688_P05	0.222336	0.25003	0.275613	0.291058	0.204935	0.233921	0.252488	0.269617
GRMZM2G149211_P01	0.387305	0.474661	0.385363	0.403019	0.368641	0.391875	0.46462	0.45785
GRMZM2G010136_P01	0.314707	0.307515	0.323074	0.291273	0.284037	0.264054	0.262523	0.286151
GRMZM2G018689_P01	0.285102	0.337056	0.365108	0.366641	0.288748	0.306242	0.349579	0.36819
GRMZM2G136178_P01	0.30176	0.336926	0.281208	0.312261	0.265211	0.259783	0.279883	0.296302
GRMZM2G115176_P01	0.391152	0.438259	0.391897	0.493808	0.377317	0.405698	0.379495	0.455707
GRMZM2G032711_P01	0.423066	0.478292	0.461396	0.532291	0.399683	0.425076	0.455921	0.490942
GRMZM2G465226_P01	0.628051	0.685895	0.452308	0.459703	0.689708	0.455384	0.506885	0.455398
GRMZM2G128012_P01	0.601425	0.488671	0.424052	0.385708	0.499664	0.47273	0.44557	0.348847
GRMZM2G042245_P01	0.449617	0.412642	0.515327	0.472879	0.45185	0.419853	0.465205	0.479292
GRMZM2G113794_P01	0.584342	0.56257	0.611109	0.667327	0.614593	0.566723	0.688737	0.704599
GRMZM2G111907_P01	0.353934	0.368059	0.378852	0.396548	0.364516	0.357735	0.377783	0.402572
GRMZM2G107116_P03	0.414804	0.446318	0.425774	0.404706	0.393573	0.419133	0.409412	0.419614
GRMZM2G105438_P01	0.482078	0.520633	0.481024	0.496371	0.500274	0.49979	0.519799	0.500032
GRMZM2G055527_P01	0.325601	0.320931	0.352885	0.335351	0.329645	0.329737	0.327078	0.345438
GRMZM2G103884_P01	0.404753	0.412242	0.503562	0.514447	0.413089	0.402645	0.497497	0.51843
AC152495.1_FGP002	0.801944	0.67666	0.388602	0.366688	0.928692	0.713359	0.401648	0.389075
GRMZM2G127729_P01	0.289111	0.263886	0.280806	0.296335	0.278869	0.28634	0.31117	0.326818
GRMZM2G105901_P01	0.22152	0.248926	0.233728	0.286386	0.223409	0.256879	0.249183	0.27997
GRMZM2G023652_P01	0.480695	0.63333	0.473841	0.592435	0.406906	0.46807	0.441172	0.503551
GRMZM2G376918_P01	0.238786	0.282927	0.332998	0.350024	0.230582	0.255547	0.307575	0.334894
GRMZM2G153409_P01	0.380348	0.379566	0.484852	0.448215	0.389461	0.368587	0.432283	0.450021
GRMZM2G098042_P01	0.468631	0.520056	0.423	0.506742	0.434332	0.479164	0.408817	0.425926
GRMZM2G129209_P01	0.330576	0.388567	0.400416	0.453923	0.339202	0.399899	0.327452	0.359965
GRMZM2G033926_P04	0.242922	0.219093	0.25617	0.248259	0.265623	0.237897	0.261956	0.26808
GRMZM2G009681_P01	0.298817	0.260796	0.264776	0.248251	0.318998	0.296895	0.32156	0.323241
GRMZM2G353147_P01	0.48776	0.509624	0.495698	0.513232	0.478278	0.502513	0.489042	0.523853
GRMZM2G117706_P01	0.651382	0.612451	0.391497	0.471569	0.599358	0.510347	0.365148	0.398249
GRMZM2G064967_P01	0.426068	0.431835	0.504148	0.502987	0.41797	0.412495	0.479698	0.491467
GRMZM2G035620_P01	1.69586	1.93002	0.627658	0.67967	1.55426	1.60888	0.625977	0.611002
GRMZM2G004694_P01	0.358579	0.356871	0.345969	0.336612	0.294548	0.306315	0.320078	0.347695
GRMZM2G167578_P01	0.434674	0.430126	0.516385	0.52023	0.469948	0.483898	0.565606	0.579133
GRMZM2G000632_P03	0.279468	0.289869	0.300245	0.317289	0.256826	0.274227	0.301798	0.31361
GRMZM2G052166_P01	0.36348	0.383094	0.384626	0.40388	0.340405	0.357397	0.371099	0.396019
GRMZM2G410757_P01	0.324269	0.284495	0.74315	0.511064	0.371059	0.319196	0.59284	0.520594
GRMZM2G057159_P02	0.64752	0.539035	0.384729	0.39375	0.80734	0.495328	0.361769	0.370529
GRMZM2G348866_P01	0.330453	0.334873	0.332885	0.305394	0.373102	0.313885	0.330224	0.345851
GRMZM2G151903_P02	1.22294	1.3164	0.473768	0.448873	0.839721	0.90079	0.392794	0.404715
GRMZM2G406674_P01	0.598122	0.610867	0.51256	0.549938	0.54066	0.548645	0.486656	0.485886
AC177850.2_FGP005	0.258491	0.362236	0.397973	0.523351	0.274767	0.324411	0.423649	0.435123
GRMZM2G114642_P01	0.963001	1.33841	0.89461	1.33964	0.866965	0.995717	0.973746	0.961244
GRMZM2G014004_P02	0.679733	0.752899	0.512169	0.545197	0.612097	0.601347	0.461929	0.501294
GRMZM2G022958_P01	0.244836	0.242729	0.415413	0.330173	0.276461	0.242265	0.509471	0.405319
GRMZM2G049201_P01	0.211384	0.225138	0.235338	0.292171	0.243052	0.244371	0.268988	0.279559
GRMZM2G320269_P01	0.601417	0.473591	0.486022	0.437699	0.607457	0.540312	0.419919	0.433583
GRMZM2G074572_P01	0.617554	0.788228	0.553491	0.644425	0.608212	0.639842	0.558344	0.589905
GRMZM2G180422_P01	0.272921	0.2797	0.294686	0.285574	0.316536	0.295578	0.286621	0.301717
GRMZM2G457789_P01	0.387193	0.38909	0.415164	0.419941	0.419785	0.410145	0.438978	0.453037
GRMZM2G094017_P01	0.591555	0.614365	0.623166	0.642358	0.62579	0.600155	0.645603	0.657008
GRMZM5G882351_P01	0.361665	0.34931	0.4452	0.386338	0.320455	0.321586	0.397083	0.418363
GRMZM2G058105_P01	0.488252	0.590332	0.596854	0.568357	0.458393	0.481696	0.550468	0.598981
GRMZM2G010754_P01	0.268653	0.283039	0.28159	0.328337	0.250465	0.30034	0.298277	0.322631
GRMZM2G121840_P01	0.265584	0.295432	0.381434	0.407065	0.282378	0.276872	0.387911	0.369992
GRMZM2G178875_P01	0.314168	0.283095	0.356645	0.372551	0.311221	0.283653	0.367588	0.377745
GRMZM2G094655_P01	0.425054	0.478935	0.432637	0.466827	0.45687	0.440542	0.487139	0.478665
GRMZM2G384528_P01	0.37356	0.347594	0.407214	0.358167	0.369711	0.369228	0.363425	0.411102
GRMZM2G073571_P03	0.277053	0.271882	0.386121	0.397655	0.29187	0.305485	0.362648	0.373953
GRMZM2G104125_P01	0.419939	0.418353	0.340349	0.392553	0.477129	0.413197	0.431073	0.44074
GRMZM2G333448_P01	0.303942	0.302983	0.283002	0.269448	0.306211	0.261419	0.301961	0.304368
GRMZM2G152889_P01	0.312933	0.339532	0.41607	0.416249	0.329979	0.321125	0.423948	0.440163
GRMZM2G150952_P01	0.772414	0.779397	0.692296	0.627186	0.610698	0.655381	0.592243	0.603719
GRMZM2G057402_P03	0.279096	0.251939	0.310165	0.288705	0.288263	0.274304	0.322886	0.317976
GRMZM2G045005_P04	0.356663	0.379566	0.407922	0.433974	0.311724	0.335111	0.367316	0.407724
GRMZM2G061321_P01	0.459622	0.486928	0.340879	0.390045	0.454705	0.4702	0.36812	0.362835
GRMZM2G087600_P01	0.268268	0.262878	0.330093	0.301614	0.272511	0.282225	0.29828	0.317465
GRMZM2G029194_P02	0.261986	0.243755	0.277347	0.249111	0.234268	0.218152	0.24847	0.266913
AC198518.3_FGP003	0.272416	0.281908	0.333007	0.312422	0.262013	0.276257	0.286879	0.308432
GRMZM2G154211_P01	0.273395	0.27826	0.489336	0.498753	0.299499	0.264254	0.453885	0.442619
GRMZM2G048672_P01	0.329151	0.350553	0.526632	0.460489	0.327634	0.32992	0.507929	0.501025
GRMZM2G040995_P01	0.340247	0.373941	0.375086	0.426794	0.338365	0.351893	0.383945	0.409728
GRMZM2G050984_P01	0.672237	0.664535	0.688463	0.7093	0.603007	0.620947	0.667542	0.707302
GRMZM2G005633_P02	0.486269	0.567964	0.683344	0.821638	0.404581	0.465348	0.455778	0.448412
GRMZM2G125266_P01	0.439678	0.491104	0.371967	0.412916	0.422688	0.452337	0.378405	0.364238
GRMZM2G046070_P03	0.919386	1.06326	0.758143	0.772453	0.839279	0.885813	0.713543	0.714793
GRMZM2G436328_P01	0.732768	0.790047	0.607599	0.656405	0.707262	0.746699	0.533828	0.558726
GRMZM2G027437_P01	0.522101	0.573782	0.471687	0.47574	0.42358	0.442691	0.376392	0.380693
GRMZM2G153920_P01	0.467853	0.361811	0.273532	0.255513	0.426032	0.312829	0.272854	0.296244
GRMZM2G169333_P07	0.610771	0.558202	0.459388	0.455768	0.515812	0.510534	0.431998	0.457526
GRMZM2G069203_P01	0.702533	0.652586	0.543469	0.58609	0.565682	0.59791	0.498717	0.519681
GRMZM2G102560_P02	0.314104	0.334521	0.325584	0.347876	0.317803	0.303075	0.341402	0.382302
GRMZM2G058128_P01	0.551619	0.562416	0.375837	0.359414	0.523376	0.540386	0.37417	0.379448
AC198353.5_FGP001	0.473835	0.40027	0.552616	0.455692	0.510671	0.384118	0.620952	0.601845
GRMZM2G150683_P03	0.716372	0.597149	0.584214	0.515732	0.770847	0.657396	0.59449	0.563801
GRMZM2G060726_P01	0.614383	0.694602	0.523042	0.577185	0.554992	0.6159	0.547987	0.538576
GRMZM2G007922_P01	0.396445	0.475106	0.448188	0.447063	0.384366	0.384143	0.38788	0.410142
GRMZM2G114140_P01	0.224639	0.25451	0.376408	0.360961	0.210445	0.238781	0.333756	0.333834
GRMZM2G170890_P01	0.453831	0.532509	0.388317	0.453082	0.494164	0.509231	0.419768	0.415764
GRMZM2G062373_P01	0.56571	0.665334	0.885809	0.761941	0.606342	0.650903	0.795066	0.735561
GRMZM2G045280_P01	0.19138	0.208684	0.314494	0.294398	0.20296	0.2089	0.283057	0.296127
GRMZM2G039381_P01	0.282549	0.319782	0.339875	0.361389	0.268655	0.338422	0.376801	0.379194
GRMZM2G137046_P01	0.474876	0.511304	0.65717	0.61365	0.3368	0.389277	0.479624	0.537299
GRMZM2G168744_P01	0.598014	0.612109	0.607123	0.68539	0.509147	0.611261	0.505706	0.537917
GRMZM2G154549_P01	0.329516	0.380127	0.280567	0.33832	0.375956	0.365723	0.327674	0.268784
GRMZM2G156632_P01	0.583251	0.83501	0.299122	0.320959	0.490433	0.679477	0.357329	0.434419
GRMZM2G024389_P02	0.688617	0.561253	0.509817	0.485228	0.710601	0.607541	0.601351	0.502258
GRMZM2G021299_P01	0.39407	0.366111	0.366032	0.330864	0.390655	0.396627	0.377513	0.378127
GRMZM2G305007_P01	0.771636	0.766253	0.535996	0.542709	0.830206	0.792016	0.545883	0.548633
GRMZM2G042592_P01	0.719285	0.686248	0.590972	0.584232	0.78105	0.706835	0.69864	0.566071
GRMZM2G012229_P01	0.416663	0.413606	0.500471	0.453222	0.448509	0.370296	0.536018	0.527882
GRMZM2G139689_P01	0.595061	0.568835	0.556186	0.511633	0.529046	0.580744	0.489574	0.502255
GRMZM2G056270_P01	0.58871	0.603777	0.536964	0.595889	0.50088	0.53387	0.484114	0.489129
GRMZM2G000749_P01	0.410863	0.360665	0.471544	0.465526	0.380523	0.36602	0.44068	0.437513
GRMZM2G102183_P02	0.300165	0.402809	0.323081	0.338772	0.272517	0.302111	0.341871	0.38534
GRMZM2G131165_P01	0.495562	0.458306	0.406805	0.391145	0.440068	0.415609	0.361508	0.36433
AC233960.1_FGP002	0.273235	0.283553	0.418933	0.444501	0.311063	0.328083	0.483191	0.457441
GRMZM2G051355_P03	0.173749	0.193259	0.21423	0.243134	0.183435	0.190423	0.236561	0.231875
GRMZM2G060183_P01	0.519359	0.554178	0.328038	0.347781	0.455384	0.464705	0.323788	0.340099
GRMZM2G123527_P01	0.552107	0.602449	0.60509	0.686189	0.512967	0.485664	0.618763	0.603438
GRMZM2G012102_P01	0.370257	0.456189	0.327513	0.362669	0.38035	0.45017	0.331326	0.321527
GRMZM2G079196_P01	0.486644	0.620157	0.494138	0.628194	0.505623	0.524311	0.598325	0.475943
GRMZM2G129761_P01	0.676655	0.973577	0.899789	1.09796	0.460624	0.553302	0.495766	0.508991
GRMZM2G315264_P01	0.35346	0.383368	0.425088	0.434528	0.448405	0.42627	0.435162	0.427051
GRMZM2G030097_P01	0.513153	0.449732	0.414536	0.369016	0.580278	0.52223	0.422036	0.395686
GRMZM2G017804_P01	0.267716	0.271905	0.327896	0.286247	0.270036	0.286078	0.301733	0.321724
GRMZM6G818567_P01	0.565926	0.510061	0.301018	0.302955	0.511286	0.482181	0.338447	0.321459
GRMZM5G801949_P02	0.688316	0.485305	0.471175	0.371356	0.762586	0.567765	0.488415	0.498416
GRMZM2G118806_P01	0.428704	0.443637	0.573483	0.574469	0.426007	0.441977	0.566138	0.545584
GRMZM2G402319_P01	0.372357	0.374433	0.422217	0.425943	0.399386	0.397021	0.475208	0.466768
GRMZM2G089962_P01	0.579921	0.603931	0.452483	0.461747	0.501947	0.545649	0.416398	0.437924
GRMZM5G836674_P02	0.280426	0.263662	0.424102	0.468137	0.298555	0.300143	0.484273	0.480701
GRMZM2G076263_P01	0.564588	0.543974	0.519269	0.518734	0.57531	0.57701	0.554478	0.479969
GRMZM2G149800_P02	0.310455	0.307548	0.43953	0.458151	0.321146	0.305738	0.420446	0.436986
AC188023.3_FGP005	0.546868	0.668694	0.513298	0.645533	0.581181	0.598828	0.592236	0.520029
GRMZM2G358540_P01	0.743215	0.6707	0.568874	0.556441	0.571054	0.569782	0.490032	0.496569
GRMZM2G158885_P02	0.542753	0.548819	0.505889	0.528877	0.595484	0.548981	0.528598	0.533934
GRMZM2G010596_P01	0.539686	0.566878	0.477231	0.494123	0.493453	0.524356	0.439277	0.464997
GRMZM2G027479_P01	0.506191	0.772346	0.400357	0.527886	0.375421	0.628758	0.353599	0.435443
GRMZM2G408458_P01	1.00791	0.960112	0.706877	0.633941	0.833284	0.980614	0.605779	0.604821
GRMZM2G341404_P01	0.397117	0.503198	0.473543	0.497645	0.425057	0.464817	0.469589	0.435701
GRMZM2G382673_P01	0.880654	1.2538	0.674956	0.788092	0.955908	1.02193	0.762999	0.661663
GRMZM2G178079_P02	0.439781	0.522364	0.363931	0.448703	0.497985	0.50009	0.462401	0.431412
GRMZM2G329909_P01	0.375205	0.358314	0.466035	0.466569	0.368444	0.364879	0.454109	0.479779
GRMZM6G676505_P01	0.4864	0.478478	0.431587	0.40623	0.512131	0.492745	0.444057	0.415039
GRMZM2G109753_P01	0.536176	0.592148	0.490896	0.571393	0.541948	0.570557	0.526329	0.503885
GRMZM2G032071_P01	0.790032	0.75477	0.787785	0.770383	0.741285	0.722214	0.689113	0.744418
GRMZM2G117189_P02	0.367704	0.350094	0.346068	0.341369	0.316435	0.326607	0.316835	0.301555
GRMZM2G060070_P01	0.631019	0.596863	0.52243	0.483988	0.538292	0.605965	0.464019	0.490757
GRMZM2G094595_P03	0.255687	0.332622	0.263734	0.317598	0.292185	0.304985	0.294425	0.272096
GRMZM2G179737_P02	0.644146	0.643294	0.527221	0.56601	0.622006	0.578621	0.551065	0.534305
GRMZM2G314679_P04	0.564191	0.710554	0.518618	0.743713	0.588835	0.626898	0.657987	0.589204
GRMZM2G015603_P01	0.32701	0.521634	0.342029	0.50826	0.315269	0.351276	0.302119	0.332403
GRMZM2G111491_P01	0.432197	0.400144	0.381883	0.390567	0.474	0.422927	0.419845	0.411769
GRMZM2G147279_P01	0.515426	0.37597	0.508759	0.375774	0.550369	0.4213	0.505169	0.4139
GRMZM2G132461_P02	0.55752	0.741366	0.4408	0.529049	0.583493	0.657953	0.622269	0.534217
GRMZM2G464328_P01	0.445213	0.511421	0.424598	0.565436	0.424914	0.455218	0.449877	0.38999
GRMZM2G017355_P01	0.576405	0.683981	0.519012	0.681724	0.534634	0.609001	0.527371	0.534539
GRMZM2G031930_P01	0.467309	0.465835	0.466941	0.445921	0.500584	0.442287	0.429492	0.448297
GRMZM2G438239_P01	0.378551	0.448733	0.349852	0.397989	0.345419	0.379214	0.34718	0.353062
GRMZM2G003165_P01	0.459745	0.512873	0.38813	0.414111	0.389351	0.409471	0.371283	0.388368
GRMZM2G097434_P02	0.431148	0.447932	0.393443	0.387665	0.410585	0.420603	0.434384	0.407573
GRMZM2G086269_P01	0.641147	0.684298	0.615445	0.635797	0.713724	0.738131	0.671136	0.633655
GRMZM5G847615_P01	0.456057	0.535446	0.434452	0.522304	0.526881	0.537306	0.529177	0.458378
GRMZM5G861791_P01	0.654205	0.700166	0.581377	0.714602	0.554482	0.597187	0.593357	0.604624
GRMZM2G424873_P02	0.430045	0.41775	0.338502	0.320311	0.432516	0.400769	0.327378	0.332727
GRMZM2G013255_P01	0.799271	0.695129	0.638893	0.595386	0.727641	0.688635	0.586288	0.60209
GRMZM2G041831_P01	0.751344	0.755743	0.558378	0.628946	0.702957	0.748999	0.594931	0.592034
GRMZM2G113205_P01	0.279111	0.288751	0.303067	0.273464	0.305006	0.3437	0.291928	0.248306
AC217358.3_FGP010	0.572203	0.510934	0.490134	0.478027	0.632044	0.600177	0.537576	0.512238
GRMZM2G180172_P02	1.07861	1.07157	0.663941	0.720314	1.06713	1.04534	0.659358	0.693737
GRMZM2G134182_P01	0.570587	0.507751	0.459289	0.440339	0.555025	0.517245	0.474484	0.47528
GRMZM2G050730_P01	0.57895	0.748644	0.382744	0.4252	0.568889	0.568804	0.352369	0.374401
GRMZM2G424595_P01	0.416805	0.416909	0.368485	0.414053	0.372775	0.455621	0.390482	0.498204
GRMZM2G142111_P01	0.385591	0.481002	0.42967	0.464804	0.379406	0.417446	0.384136	0.391279
AC208337.2_FGP003	0.280198	0.356473	0.26995	0.296525	0.274676	0.231584	0.295236	0.32869
GRMZM2G113418_P01	0.417773	0.437965	0.405398	0.43059	0.416032	0.443861	0.392202	0.389512
GRMZM2G049798_P01	0.247521	0.229157	0.343433	0.316232	0.261824	0.227274	0.34187	0.366022
GRMZM2G175818_P02	0.625441	0.687951	0.704437	0.82943	0.581098	0.599255	0.65913	0.646592
GRMZM2G481604_P01	0.512473	0.620946	0.47598	0.611465	0.516919	0.560481	0.540151	0.49492
GRMZM2G174671_P04	0.451484	0.496516	0.42786	0.443267	0.475274	0.474097	0.460869	0.437298
GRMZM2G021687_P01	0.595875	0.573595	0.750023	0.557555	0.650497	0.632006	0.678965	0.561484
GRMZM2G157263_P01	0.973541	1.03616	0.547586	0.578279	0.892581	0.863487	0.554831	0.553533
GRMZM2G142740_P01	0.377514	0.427487	0.372717	0.445006	0.339266	0.346596	0.333808	0.357605
GRMZM2G063533_P01	0.297125	0.237542	0.288965	0.253816	0.321049	0.271048	0.329135	0.334654
GRMZM2G057056_P01	0.474486	0.475038	0.464966	0.462301	0.461018	0.458948	0.425477	0.444432
GRMZM2G032821_P02	0.491735	0.48661	0.522416	0.552139	0.479283	0.484041	0.500457	0.483318
GRMZM2G107571_P01	0.299357	0.358527	0.296324	0.360428	0.337582	0.354843	0.333974	0.325629
GRMZM2G101130_P01	0.518118	0.526156	0.556558	0.507001	0.506488	0.469538	0.446522	0.46962
GRMZM2G473310_P01	0.44984	0.441438	0.47342	0.468313	0.443338	0.43977	0.494411	0.456136
GRMZM2G103345_P02	0.548787	0.486028	0.520069	0.486706	0.499183	0.500373	0.503257	0.455598
AC217358.3_FGP011	0.529761	0.553824	0.47488	0.528332	0.507444	0.499303	0.43957	0.466888
GRMZM2G063806_P01	0.555122	0.702771	0.530719	0.697642	0.494642	0.567833	0.548424	0.569515
GRMZM2G066051_P01	0.531753	0.655776	0.478387	0.58905	0.498487	0.553213	0.536184	0.490485
GRMZM2G066469_P01	0.355133	0.353889	0.319467	0.289268	0.361177	0.36603	0.307111	0.314591
GRMZM2G097896_P01	0.78039	0.751171	0.715255	0.727498	0.79021	0.739386	0.745687	0.750402
GRMZM2G073310_P01	0.653099	0.558991	0.605656	0.604702	0.678068	0.614908	0.675545	0.609031
GRMZM2G387394_P01	0.35887	0.379444	0.293482	0.350627	0.286342	0.340244	0.320572	0.337086
GRMZM2G137786_P01	0.587811	0.591218	0.533203	0.615328	0.561303	0.566301	0.628002	0.5835
GRMZM2G165681_P01	0.568041	0.631031	0.531217	0.609812	0.578788	0.590749	0.614447	0.542581
GRMZM5G853854_P04	0.561807	0.600354	0.519244	0.541772	0.549591	0.511073	0.520029	0.529463
GRMZM2G102808_P03	0.55066	0.553458	0.514245	0.620199	0.534844	0.531428	0.51745	0.511048
GRMZM2G177947_P01	0.386327	0.453783	0.392607	0.450303	0.403145	0.431406	0.400145	0.415619
GRMZM2G416308_P01	0.684891	0.783131	0.603509	0.733525	0.566811	0.641517	0.667567	0.652382
GRMZM2G080521_P01	0.486935	0.498809	0.453525	0.468776	0.445095	0.461692	0.423628	0.428207
GRMZM2G034764_P01	0.981901	0.800588	0.74118	0.527675	0.903398	0.828122	0.601196	0.615939
GRMZM2G108123_P01	0.332985	0.363415	0.243364	0.308783	0.30034	0.250452	0.251601	0.282392
GRMZM2G133885_P01	0.483379	0.447333	0.432726	0.448923	0.492226	0.464889	0.444984	0.452207
GRMZM2G173809_P01	0.654461	0.69888	0.482005	0.594372	0.437938	0.585379	0.406618	0.473681
GRMZM2G173536_P01	0.357195	0.357519	0.401538	0.367596	0.455138	0.380451	0.489604	0.524291
GRMZM2G474883_P01	0.313352	0.394871	0.36934	0.438548	0.332863	0.335873	0.42254	0.392614
GRMZM2G140082_P02	0.438108	0.402089	0.368573	0.372762	0.484775	0.437317	0.42045	0.40926
GRMZM2G163988_P01	0.273982	0.260471	0.425229	0.400184	0.315267	0.375496	0.500439	0.448932
GRMZM2G067992_P01	0.552525	0.610484	0.618303	0.657678	0.52488	0.557428	0.57943	0.565939
GRMZM5G855860_P02	0.553228	0.516279	0.475254	0.495742	0.49646	0.509392	0.475734	0.477911
GRMZM2G134985_P01	0.459824	0.420479	0.374515	0.390963	0.432634	0.426347	0.421049	0.407523
GRMZM2G105005_P01	0.548027	0.695265	0.494987	0.574774	0.585114	0.636813	0.597272	0.534415
GRMZM2G152477_P01	0.626712	0.604636	0.619277	0.609865	0.554937	0.564036	0.528707	0.558496
GRMZM2G045371_P02	0.869287	0.882372	0.914878	0.933037	0.827356	0.857275	0.839341	0.876455
GRMZM2G157010_P01	0.579192	0.526239	0.51894	0.537016	0.578274	0.563882	0.512637	0.517153
GRMZM2G060011_P01	0.44614	0.504937	0.417104	0.469017	0.444461	0.4976	0.445645	0.441762
GRMZM2G054210_P01	0.438254	0.488875	0.369349	0.470712	0.383752	0.416826	0.379238	0.386327
GRMZM2G480516_P01	0.50536	0.597281	0.533451	0.59957	0.518013	0.542142	0.527572	0.509946
GRMZM2G459874_P02	0.985907	1.04851	0.729253	0.723329	0.896008	0.920291	0.680791	0.682577
GRMZM2G428168_P01	0.597305	0.720023	0.534315	0.717787	0.579484	0.640718	0.605855	0.604511
GRMZM2G157379_P01	0.547022	0.475285	0.454631	0.432382	0.561109	0.576795	0.468016	0.48476
GRMZM2G103662_P02	0.715632	0.689583	0.51198	0.480185	0.647968	0.650508	0.482377	0.488434
GRMZM2G128651_P01	0.448257	0.560249	0.427313	0.50718	0.406549	0.463749	0.406911	0.446459
GRMZM2G172274_P01	0.24834	0.348905	0.477857	0.460477	0.312951	0.473616	0.500125	0.511062
GRMZM2G116434_P01	0.342861	0.33958	0.318956	0.342224	0.344769	0.342832	0.31064	0.324805
GRMZM2G031496_P01	1.51243	1.29094	0.716626	0.602027	1.39479	1.27693	0.602429	0.603832
GRMZM2G001803_P01	0.188296	0.18784	0.38185	0.39812	0.205889	0.197006	0.394231	0.380101
GRMZM2G033491_P01	0.443007	0.521453	0.417139	0.460108	0.43459	0.49411	0.445939	0.450322
GRMZM2G312997_P01	0.613013	0.676246	0.399147	0.406905	0.495631	0.576007	0.43388	0.399171
GRMZM2G095261_P01	0.374112	0.367373	0.334144	0.344445	0.383418	0.343397	0.413206	0.439905
GRMZM2G117811_P01	0.570199	0.545618	0.577661	0.551212	0.529109	0.490458	0.523355	0.54572
GRMZM2G023711_P01	0.570705	0.532898	0.53925	0.57199	0.63148	0.606975	0.644772	0.568598
GRMZM2G029396_P01	0.402704	0.473834	0.457158	0.612134	0.408869	0.422036	0.456759	0.433172
GRMZM2G087850_P04	0.544967	0.682432	0.55639	0.639553	0.539307	0.597936	0.541641	0.564441
GRMZM2G002754_P01	0.641353	0.627308	0.642375	0.667277	0.619244	0.605945	0.587596	0.608902
GRMZM2G049416_P01	0.394158	0.418813	0.35035	0.384469	0.358435	0.405667	0.331198	0.35691
GRMZM2G132021_P03	0.415529	0.420408	0.385382	0.453924	0.417206	0.433418	0.386025	0.421442
GRMZM2G118265_P01	0.344944	0.353471	0.300275	0.348206	0.317643	0.334377	0.338899	0.328851
GRMZM2G143627_P02	0.376777	0.513462	0.441748	0.535653	0.416206	0.48085	0.475653	0.426317
GRMZM2G466281_P03	0.528183	0.557925	0.563122	0.594573	0.494289	0.541512	0.505758	0.54797
GRMZM2G170516_P01	0.430556	0.432668	0.429305	0.417204	0.408874	0.406105	0.399735	0.408886
GRMZM2G046900_P01	0.596988	0.680949	0.588452	0.699426	0.496853	0.507936	0.546295	0.549768
GRMZM2G012174_P01	0.4844	0.536687	0.604688	0.635027	0.488284	0.520012	0.541101	0.523135
GRMZM2G036206_P01	0.466974	0.435367	0.434266	0.443114	0.474369	0.478533	0.474312	0.459731
GRMZM2G018586_P01	0.689105	0.735403	0.463405	0.410725	0.753471	0.67574	0.479859	0.458958
GRMZM2G467907_P01	0.429912	0.482599	0.420158	0.467847	0.360021	0.394031	0.383949	0.394817
GRMZM2G052373_P01	0.364556	0.367647	0.524316	0.61038	0.434569	0.47608	0.627489	0.594963
GRMZM2G174048_P01	0.471969	0.442372	0.49867	0.444705	0.45522	0.452093	0.458018	0.443621
GRMZM2G082198_P01	0.656008	0.718115	0.652496	0.677376	0.632096	0.66376	0.690219	0.643264
GRMZM2G116846_P01	0.429221	0.421874	0.399993	0.424859	0.423489	0.440921	0.396303	0.396674
GRMZM2G051174_P01	0.587958	0.629684	0.629587	0.630791	0.641175	0.651036	0.611577	0.618191
GRMZM2G123896_P04	0.478542	0.436411	0.975126	0.448899	0.638798	0.649345	0.778247	0.594632
GRMZM2G053977_P01	0.686388	0.708768	0.61228	0.617703	0.712122	0.694561	0.644211	0.6573
GRMZM2G116858_P02	0.499629	0.576528	0.47556	0.608553	0.52224	0.577164	0.529529	0.544131
GRMZM2G166718_P02	0.231081	0.283318	0.225809	0.278073	0.241092	0.257967	0.237671	0.244989
GRMZM2G023110_P01	0.536673	0.612852	0.54747	0.590945	0.49635	0.518933	0.50361	0.526501
GRMZM2G110198_P04	0.477154	0.471847	0.439072	0.440699	0.481662	0.457653	0.452988	0.445591
GRMZM2G361652_P02	0.303866	0.294717	0.274888	0.261476	0.336985	0.307376	0.278443	0.275582
GRMZM2G168299_P02	0.785441	0.755112	0.744981	0.768436	0.730682	0.753907	0.730287	0.731153
GRMZM2G025870_P01	0.827093	0.835346	0.606604	0.650418	0.891963	0.804179	0.702504	0.681893
GRMZM2G177026_P01	0.490062	0.540872	0.478594	0.531384	0.488242	0.490215	0.491804	0.488826
GRMZM2G129431_P01	0.546548	0.587337	0.546928	0.536422	0.553111	0.530562	0.508633	0.523791
GRMZM2G082642_P06	0.526514	0.544681	0.502621	0.505172	0.471635	0.469231	0.492176	0.487969
GRMZM2G008864_P01	0.794831	0.861233	0.471805	0.423847	0.763957	0.79784	0.415621	0.470865
GRMZM2G362368_P01	0.362204	0.358559	0.371853	0.352604	0.412261	0.401976	0.372757	0.367786
GRMZM2G000623_P02	0.413798	0.434215	0.419264	0.444918	0.401528	0.396573	0.431222	0.391815
GRMZM2G018579_P01	0.240672	0.216313	0.314274	0.250846	0.180754	0.175149	0.303927	0.318065
GRMZM2G313101_P01	0.385289	0.380463	0.374882	0.37145	0.379889	0.386249	0.350493	0.371284
GRMZM2G104658_P07	0.360682	0.321588	0.290024	0.280076	0.378493	0.387639	0.32674	0.321424
GRMZM2G153393_P01	0.508324	0.525919	0.52271	0.489163	0.490815	0.492268	0.487439	0.483362
GRMZM2G055467_P01	0.294532	0.289172	0.2688	0.254498	0.354627	0.314198	0.284028	0.273478
GRMZM2G103771_P01	0.578168	0.62804	0.609184	0.659486	0.429784	0.468792	0.467366	0.492514
GRMZM2G094581_P01	0.67617	0.674512	0.669616	0.684979	0.633345	0.635923	0.672299	0.68649
GRMZM2G168337_P01	0.730153	0.693279	0.628484	0.677585	0.675723	0.655524	0.620003	0.652581
GRMZM2G442057_P01	0.406742	0.474181	0.327939	0.427365	0.42955	0.462647	0.398538	0.406371
GRMZM2G061910_P01	0.525873	0.519345	0.49336	0.463147	0.520583	0.513393	0.464359	0.49994
GRMZM2G098674_P01	0.438064	0.502814	0.400913	0.458823	0.470075	0.486816	0.442894	0.466268
GRMZM2G027886_P01	0.462429	0.529006	0.428823	0.4539	0.465392	0.458557	0.427934	0.440626
GRMZM2G159475_P01	0.729663	0.726351	0.668387	0.697041	0.726309	0.714882	0.705478	0.698555
GRMZM2G115615_P01	0.312996	0.421046	0.335715	0.479708	0.317843	0.376025	0.390903	0.365764
GRMZM2G033680_P01	0.450934	0.47658	0.408386	0.506305	0.439422	0.466609	0.490895	0.427535
GRMZM2G383088_P01	0.642894	0.551236	0.647878	0.584738	0.664147	0.60181	0.673048	0.634251
GRMZM2G165290_P01	0.550192	0.6691	0.604091	0.78279	0.552489	0.621263	0.603948	0.616126
GRMZM2G012224_P01	0.520638	0.630065	0.572485	0.706038	0.44636	0.493246	0.461036	0.503466
GRMZM2G102580_P01	0.582925	0.567854	0.526151	0.611114	0.630865	0.568388	0.607688	0.571682
GRMZM2G411668_P01	0.649189	0.573374	0.515439	0.479095	0.662359	0.694547	0.547919	0.544744
GRMZM2G439950_P02	0.510961	0.67578	0.519969	0.638179	0.562449	0.61157	0.590896	0.556861
GRMZM2G003794_P03	0.54795	0.622049	0.609561	0.690026	0.499048	0.601867	0.573428	0.522738
GRMZM5G898755_P01	0.208586	0.377479	0.310756	0.683925	0.17465	0.263533	0.249786	0.397951
GRMZM2G058021_P01	0.515731	0.529403	0.504599	0.509859	0.487977	0.475198	0.48109	0.496142
GRMZM2G100043_P02	0.490712	0.577875	0.553589	0.604452	0.47641	0.53298	0.546777	0.550537
GRMZM2G024391_P01	0.662216	0.491758	0.601156	0.501105	0.676745	0.553039	0.619537	0.561112
GRMZM2G014076_P01	0.493484	0.636045	0.551355	0.690574	0.412114	0.497809	0.527191	0.52476
GRMZM2G301803_P03	0.485597	0.468252	0.444367	0.440632	0.454287	0.480449	0.456041	0.437042
GRMZM2G148411_P01	0.391967	0.411556	0.324384	0.35343	0.392069	0.39457	0.360354	0.371671
GRMZM2G109731_P01	0.392502	0.45537	0.361939	0.435114	0.424797	0.438975	0.431128	0.393508
GRMZM2G472693_P02	0.428554	0.335724	0.460207	0.340241	0.37131	0.315052	0.376705	0.372207
GRMZM2G098214_P01	0.306056	0.340324	0.329553	0.372423	0.306406	0.30671	0.346614	0.358581
GRMZM2G006661_P01	0.416071	0.475749	0.433898	0.506149	0.448919	0.464861	0.469455	0.451565
GRMZM2G056103_P02	0.788054	0.784533	0.746877	0.747406	0.710245	0.72607	0.744792	0.752023
GRMZM2G115621_P01	0.363465	0.396416	0.361804	0.401242	0.361548	0.382757	0.366459	0.366308
GRMZM5G830695_P02	0.506506	0.506015	0.52759	0.516989	0.486574	0.484223	0.472055	0.500048
GRMZM2G019411_P01	0.380536	0.358751	0.410855	0.400812	0.399736	0.359861	0.336502	0.352946
GRMZM2G115013_P01	0.633727	0.61834	0.562789	0.592919	0.570894	0.570445	0.553957	0.563597
GRMZM2G104505_P01	0.650357	0.765287	0.671584	0.760763	0.57276	0.588578	0.646068	0.677937
GRMZM2G149553_P01	0.670216	0.686692	0.638787	0.673088	0.562533	0.596149	0.574076	0.598459
GRMZM2G017299_P01	0.650628	0.606654	0.647917	0.643608	0.609363	0.604618	0.611126	0.626086
GRMZM2G102231_P02	0.573868	0.64213	0.43499	0.450538	0.531816	0.561867	0.412763	0.392028
GRMZM2G405178_P02	0.425293	0.500922	0.440669	0.478171	0.435964	0.461533	0.455537	0.468579
GRMZM2G019177_P03	0.471536	0.472553	0.510729	0.505486	0.504543	0.487095	0.533388	0.51467
GRMZM2G078468_P01	0.423835	0.434857	0.415879	0.402753	0.422544	0.422196	0.397323	0.413946
GRMZM5G806387_P01	0.496747	0.577714	0.511337	0.627509	0.475402	0.519327	0.563731	0.561567
GRMZM2G085254_P01	0.490233	0.438603	0.483557	0.445457	0.434808	0.438398	0.471015	0.464595
GRMZM2G168096_P01	0.493538	0.521442	0.481843	0.521266	0.486995	0.491545	0.519109	0.484261
GRMZM2G001363_P01	0.442047	0.467609	0.460499	0.520334	0.412871	0.420474	0.491099	0.451734
GRMZM2G009253_P01	0.421112	0.500722	0.398212	0.49327	0.444474	0.506152	0.468914	0.43381
GRMZM2G137139_P01	0.520642	0.602844	0.554073	0.644344	0.543604	0.59301	0.603553	0.604596
GRMZM2G144501_P01	0.588479	0.391173	0.392368	0.376094	0.47427	0.506444	0.470046	0.467792
GRMZM2G089021_P01	0.474982	0.469013	0.48566	0.492443	0.430147	0.441112	0.432989	0.44032
GRMZM2G420743_P01	0.238602	0.264507	0.424433	0.39278	0.246762	0.249888	0.42237	0.427325
GRMZM2G002921_P01	0.34308	0.42652	0.399246	0.480597	0.380369	0.413471	0.468932	0.421117
GRMZM2G082633_P01	1.06883	1.00727	0.814133	0.786107	1.07941	1.0223	0.777796	0.777495
GRMZM2G426242_P01	0.460521	0.459583	0.49291	0.436677	0.447114	0.472985	0.422769	0.474109
AC194970.5_FGP004	0.466909	0.472235	0.509552	0.55749	0.513852	0.479466	0.494595	0.505901
GRMZM2G174236_P01	0.505258	0.504388	0.441249	0.468171	0.450318	0.446862	0.407084	0.443336
GRMZM2G149286_P01	0.290308	0.28089	0.307857	0.314714	0.274079	0.29353	0.289377	0.282577
GRMZM2G044627_P01	0.642674	0.803013	0.739329	0.91403	0.542067	0.614127	0.515038	0.563055
GRMZM2G124820_P01	0.31545	0.345713	0.294479	0.36272	0.327472	0.353121	0.346035	0.321677
GRMZM2G158083_P02	0.745489	0.677794	0.661654	0.690074	0.767338	0.762955	0.68218	0.679182
GRMZM5G802566_P06	0.272202	0.324028	0.331453	0.434416	0.28818	0.326886	0.357487	0.332014
GRMZM2G369912_P01	0.468126	0.528901	0.509662	0.53766	0.4663	0.473756	0.505727	0.509869
GRMZM2G446171_P01	0.638615	0.63705	0.705081	0.672557	0.639513	0.653653	0.709621	0.677244
GRMZM2G126338_P01	0.4999	0.500795	0.492167	0.517691	0.520541	0.452467	0.492388	0.524052
GRMZM2G153615_P01	0.701963	0.714506	0.675136	0.701813	0.629692	0.600254	0.624469	0.685501
GRMZM2G324886_P01	0.416381	0.552234	0.485897	0.574296	0.378444	0.424749	0.418075	0.416591
GRMZM2G058872_P01	0.385653	0.437173	0.408861	0.504221	0.438857	0.536209	0.502424	0.453268
GRMZM2G107588_P01	0.390818	0.46476	0.375475	0.516042	0.460961	0.479955	0.510867	0.467789
GRMZM2G113156_P03	0.457135	0.465298	0.459348	0.493434	0.385082	0.46389	0.459767	0.482713
GRMZM2G153769_P01	0.396341	0.416045	0.358857	0.45169	0.412032	0.431108	0.462418	0.404841
GRMZM2G376727_P04	0.69926	0.825831	0.430701	0.451414	0.671226	0.73175	0.40442	0.452065
GRMZM2G002616_P01	0.508912	0.566095	0.45989	0.53627	0.477501	0.498788	0.471446	0.481098
GRMZM5G823484_P01	0.582766	0.655663	0.516317	0.658866	0.547242	0.578029	0.562032	0.565753
GRMZM2G429842_P02	0.418813	0.455693	0.436231	0.434046	0.369776	0.438392	0.390367	0.390014
GRMZM2G077531_P01	0.764246	0.66938	0.762217	0.693606	0.827205	0.764102	0.763988	0.755255
GRMZM2G078723_P01	0.378995	0.42443	0.403256	0.451087	0.398372	0.405709	0.437146	0.434338
GRMZM2G156162_P06	0.287751	0.269143	0.28222	0.273205	0.304816	0.290393	0.323177	0.302629
GRMZM2G444808_P01	0.363378	0.387424	0.399865	0.396044	0.346871	0.356896	0.361875	0.387647
GRMZM2G126397_P01	0.588877	0.668631	0.61764	0.681017	0.487379	0.549756	0.510748	0.562619
GRMZM2G113365_P01	0.491334	0.471852	0.50328	0.486418	0.41905	0.406376	0.428136	0.460222
GRMZM2G372684_P02	1.6472	1.6361	0.968954	0.996267	1.57214	1.57453	0.973973	0.964175
GRMZM2G073521_P01	0.472755	0.38427	0.468149	0.408356	0.39447	0.379827	0.413277	0.412229
GRMZM2G137984_P01	0.444989	0.513632	0.410683	0.512324	0.424952	0.453285	0.446153	0.460649
GRMZM2G006416_P01	0.535541	0.524657	0.507286	0.54781	0.553556	0.574815	0.53618	0.553487
GRMZM2G008607_P01	0.599514	0.603125	0.541875	0.539363	0.61304	0.583209	0.581454	0.605086
GRMZM2G004715_P01	0.523421	0.527426	0.558193	0.58373	0.525562	0.532037	0.54452	0.538443
GRMZM2G159160_P01	0.548137	0.475512	0.503092	0.452006	0.532701	0.503823	0.498151	0.486577
GRMZM2G342509_P01	0.531542	0.501669	0.482802	0.485369	0.488746	0.497339	0.497515	0.515018
GRMZM2G007630_P01	0.504374	0.478339	0.442688	0.434945	0.471316	0.475217	0.408787	0.451
GRMZM2G020295_P02	0.51163	0.577833	0.58662	0.589468	0.576332	0.595907	0.636577	0.592301
GRMZM2G096037_P02	0.433972	0.368661	0.35681	0.306989	0.413941	0.378057	0.373873	0.367696
GRMZM2G449274_P01	0.33354	0.333258	0.268141	0.262284	0.295072	0.297216	0.264926	0.278896
GRMZM2G110929_P01	0.508948	0.518337	0.528329	0.479507	0.530816	0.497754	0.457426	0.478883
GRMZM2G474658_P03	0.538212	0.531127	0.507336	0.507714	0.477809	0.494967	0.449569	0.493267
GRMZM2G048117_P01	0.525008	0.581173	0.478158	0.552915	0.521246	0.579391	0.538236	0.557206
GRMZM2G168301_P01	0.576015	0.625921	0.517663	0.60714	0.587099	0.590191	0.590026	0.572613
GRMZM2G112352_P02	0.46362	0.472697	0.445164	0.479744	0.442179	0.439214	0.471671	0.452378
GRMZM2G052078_P02	0.465272	0.579473	0.472793	0.614797	0.424055	0.475493	0.459995	0.508122
GRMZM2G126468_P01	0.396052	0.422669	0.422677	0.467658	0.364076	0.396733	0.427287	0.436181
GRMZM2G438938_P01	0.676481	0.679097	0.632327	0.663123	0.641826	0.682885	0.655037	0.702557
GRMZM2G045706_P01	0.678206	0.623106	0.70268	0.592532	0.748546	0.681158	0.642928	0.664178
GRMZM2G026309_P01	0.477092	0.559797	0.533383	0.584786	0.424572	0.466327	0.476044	0.477999
GRMZM2G155077_P01	0.683008	0.710139	0.592107	0.615175	0.693856	0.760864	0.655927	0.622257
GRMZM2G018275_P01	0.604183	0.548794	0.662159	0.58031	0.562069	0.548179	0.586213	0.574759
GRMZM2G446872_P01	0.276429	0.303763	0.276473	0.298674	0.289929	0.300831	0.288235	0.299
GRMZM2G104166_P02	0.547976	0.59612	0.564077	0.603027	0.556817	0.608894	0.589501	0.600254
GRMZM5G800101_P01	0.669293	0.539089	0.633228	0.557147	0.674199	0.617053	0.671056	0.638935
GRMZM2G136306_P01	0.97526	0.933019	0.868257	0.886381	0.966489	0.877118	1.0544	0.772408
GRMZM2G122481_P01	0.475814	0.516979	0.531382	0.585411	0.448905	0.443732	0.49156	0.506217
GRMZM2G045854_P01	0.393305	0.402896	0.461109	0.411802	0.402709	0.415958	0.422594	0.422961
GRMZM2G149224_P01	0.497679	0.598779	0.511298	0.641378	0.503053	0.503	0.535866	0.54228
GRMZM2G102196_P01	0.549869	0.621278	0.540213	0.680635	0.571464	0.69773	0.71233	0.626481
GRMZM2G044531_P01	0.216929	0.254687	0.230893	0.259408	0.253835	0.267969	0.268974	0.247304
GRMZM2G004128_P01	0.413292	0.39752	0.447198	0.411585	0.41873	0.418117	0.400913	0.425979
GRMZM2G406119_P01	0.276452	0.259804	0.55191	0.551807	0.30532	0.322837	0.515101	0.550103
GRMZM2G146887_P02	0.48224	0.54172	0.475813	0.511399	0.515081	0.516039	0.46485	0.492857
GRMZM2G139941_P01	0.428973	0.426422	0.406369	0.40958	0.362232	0.422263	0.446653	0.430841
GRMZM2G040247_P01	0.593819	0.593645	0.590599	0.612805	0.549143	0.565337	0.562512	0.598807
GRMZM2G458283_P01	0.645759	0.607283	0.610034	0.62359	0.632166	0.619971	0.618231	0.642966
GRMZM2G164308_P03	0.185398	0.175109	0.398328	0.359393	0.220535	0.222471	0.372291	0.399808
GRMZM2G169486_P01	0.242632	0.269672	0.498665	0.455025	0.259066	0.267648	0.477736	0.529556
GRMZM2G002786_P01	0.490624	0.63175	0.686083	0.842986	0.536756	0.701017	0.758147	0.68597
GRMZM2G141858_P01	0.538963	0.45337	0.45893	0.42455	0.491403	0.41214	0.435584	0.451726
GRMZM2G394968_P01	0.486521	0.46483	0.463997	0.471555	0.550948	0.52831	0.538759	0.495081
GRMZM2G021694_P01	0.527785	0.481234	0.541932	0.521149	0.604444	0.527788	0.555303	0.5737
GRMZM2G124143_P03	0.512997	0.586061	0.504124	0.61369	0.47917	0.546104	0.521023	0.570166
GRMZM2G151015_P02	0.488991	0.483382	0.392058	0.434031	0.468813	0.477849	0.447555	0.473987
GRMZM2G013378_P01	0.530527	0.556995	0.514207	0.536227	0.530892	0.578872	0.529106	0.556509
GRMZM2G153704_P01	0.458255	0.469063	0.430827	0.501154	0.443582	0.465505	0.441256	0.457024
GRMZM2G134270_P01	0.511954	0.503838	0.464525	0.479623	0.507617	0.527927	0.504583	0.499932
GRMZM2G117614_P01	1.05422	0.938056	0.737975	0.726367	0.958367	0.827787	0.717838	0.706054
GRMZM2G091362_P01	0.377487	0.434625	0.413698	0.464958	0.375915	0.431347	0.41886	0.416443
GRMZM2G163277_P01	0.483861	0.548702	0.574239	0.626424	0.442013	0.547921	0.549266	0.560907
GRMZM2G348675_P02	0.68002	0.70976	0.668317	0.755391	0.680937	0.71405	0.720555	0.737636
GRMZM2G016836_P01	0.833721	1.10664	0.494474	0.575036	0.605154	0.703673	0.497429	0.517202
GRMZM2G150209_P02	0.672425	0.758947	0.648862	0.743842	0.689324	0.713732	0.717951	0.721583
GRMZM2G040559_P01	0.742507	0.806036	0.56107	0.655527	0.822408	0.814829	0.625314	0.638974
GRMZM2G123714_P01	0.337694	0.451264	0.329755	0.452372	0.337207	0.353713	0.364884	0.37311
GRMZM2G084928_P02	0.290233	0.288417	0.302499	0.3176	0.264278	0.289679	0.27181	0.308817
GRMZM2G159759_P01	0.379982	0.426277	0.410726	0.439635	0.400498	0.440797	0.405838	0.429581
GRMZM2G128444_P02	0.276313	0.289567	0.276465	0.298685	0.271117	0.314622	0.315459	0.291106
GRMZM2G109589_P01	0.408185	0.422555	0.419975	0.449959	0.393548	0.39457	0.411667	0.432874
GRMZM2G360455_P01	0.589198	0.546072	0.490234	0.502082	0.620292	0.585995	0.482519	0.516941
GRMZM2G139621_P01	0.363201	0.401355	0.387636	0.478461	0.280669	0.3235	0.365882	0.399296
GRMZM2G173119_P01	0.415324	0.425701	0.40112	0.383976	0.424098	0.449741	0.417542	0.415831
GRMZM2G102349_P01	0.435632	0.39515	0.461124	0.494048	0.464895	0.406691	0.550521	0.458606
GRMZM2G020034_P01	0.315028	0.35467	0.317154	0.347512	0.320333	0.349077	0.332471	0.330422
GRMZM2G120539_P01	0.686563	0.698238	0.604311	0.592722	0.579681	0.617707	0.584504	0.636275
GRMZM2G087146_P03	0.405144	0.416738	0.408119	0.435779	0.407313	0.422073	0.423268	0.414898
GRMZM2G032218_P02	0.424764	0.419915	0.427029	0.409841	0.391951	0.386799	0.447707	0.425327
GRMZM2G114584_P03	0.60613	0.684988	0.606936	0.644976	0.586505	0.605193	0.610223	0.655048
GRMZM2G041050_P02	0.763705	0.70441	0.657353	0.618004	0.758433	0.760802	0.698878	0.70508
GRMZM2G077844_P01	0.576568	0.543432	0.594949	0.521144	0.602775	0.605097	0.612376	0.610326
GRMZM2G140817_P01	0.458392	0.574194	0.459494	0.587534	0.434475	0.484165	0.492243	0.509504
GRMZM2G090034_P02	0.555075	0.561311	0.505553	0.570048	0.533192	0.5148	0.548484	0.544871
GRMZM2G115750_P01	0.360317	0.389723	0.344745	0.396961	0.371432	0.372928	0.388841	0.375053
GRMZM2G005788_P01	0.368019	0.418275	0.484812	0.531738	0.331432	0.39443	0.385514	0.419113
GRMZM2G042171_P01	0.458641	0.439602	0.488957	0.486083	0.436242	0.425687	0.462843	0.468613
GRMZM5G858556_P01	0.603638	0.522104	0.554409	0.555929	0.551506	0.529803	0.470862	0.545082
GRMZM2G000397_P01	0.394214	0.429112	0.320139	0.394824	0.48068	0.458117	0.434254	0.421993
GRMZM2G133012_P01	0.699775	0.674589	0.646478	0.629571	0.682668	0.639969	0.666418	0.693865
GRMZM2G168953_P01	0.357838	0.393879	0.353453	0.349255	0.376753	0.41162	0.381535	0.375667
GRMZM2G090500_P01	0.231058	0.332726	0.290103	0.393373	0.235996	0.269992	0.282705	0.297379
GRMZM2G051879_P05	0.279255	0.270463	0.522195	0.496328	0.339464	0.319356	0.371501	0.401438
GRMZM2G180654_P02	0.350835	0.492416	0.381015	0.525248	0.3915	0.38816	0.642473	0.495019
GRMZM2G398527_P01	0.385974	0.42688	0.413954	0.458985	0.381278	0.394457	0.417588	0.454218
GRMZM2G455115_P01	0.496227	0.502467	0.509207	0.520302	0.46484	0.48532	0.498448	0.523188
GRMZM2G129540_P01	0.298418	0.368541	0.331032	0.354184	0.304415	0.327951	0.336769	0.345357
GRMZM2G076399_P01	0.384256	0.435723	0.422413	0.459009	0.386698	0.390373	0.428644	0.426217
GRMZM2G549512_P01	0.686856	0.680567	0.769482	0.709175	0.690603	0.638911	0.731447	0.759624
GRMZM2G058345_P01	0.596524	0.578164	0.58644	0.605396	0.566444	0.563122	0.575125	0.595451
GRMZM2G066426_P01	0.43203	0.400246	0.43056	0.439618	0.410014	0.405189	0.394936	0.42074
GRMZM2G130379_P02	0.758505	0.695321	0.931133	0.910934	0.777562	0.738925	0.983781	0.870505
GRMZM2G133844_P01	0.769604	0.655837	0.888071	0.722387	0.859372	0.780362	0.859003	0.798698
GRMZM2G009189_P01	0.459723	0.47852	0.417269	0.453362	0.457992	0.503534	0.436763	0.459503
GRMZM2G003307_P02	0.482422	0.446449	0.456998	0.461173	0.451849	0.444113	0.451004	0.472659
GRMZM2G438622_P05	0.438653	0.459118	0.45925	0.490847	0.432428	0.428497	0.463555	0.49432
GRMZM2G091151_P01	0.560537	0.615403	0.56362	0.604836	0.538822	0.603247	0.592943	0.587259
GRMZM2G351248_P01	0.180755	0.194166	0.329906	0.317113	0.167417	0.174321	0.305102	0.33122
GRMZM2G067417_P02	0.367044	0.419859	0.458949	0.450879	0.357864	0.399632	0.464134	0.414972
GRMZM2G158629_P02	0.568733	0.59272	0.546763	0.58685	0.575177	0.569333	0.615414	0.611677
GRMZM5G898305_P01	0.392842	0.424	0.395867	0.444604	0.388181	0.41145	0.441525	0.434865
GRMZM2G014720_P01	0.465603	0.490569	0.492635	0.536192	0.492663	0.495308	0.518773	0.508257
GRMZM2G028552_P01	0.538363	0.599544	0.619195	0.655313	0.537415	0.548988	0.571496	0.596352
GRMZM2G061446_P01	0.575714	0.617452	0.54277	0.651127	0.503607	0.586233	0.59559	0.594174
GRMZM2G035517_P01	0.435273	0.467232	0.496654	0.503395	0.503006	0.531578	0.526025	0.536836
GRMZM2G004511_P01	0.260016	0.316356	0.420882	0.409932	0.294194	0.290448	0.331297	0.343541
GRMZM2G176688_P01	0.40136	0.436926	0.396445	0.456495	0.376575	0.405065	0.438069	0.422398
GRMZM5G884242_P04	0.408825	0.532249	0.700189	0.60183	0.440495	0.572203	0.538903	0.53864
GRMZM2G156818_P01	0.743285	0.785939	0.731532	0.772816	0.709251	0.736015	0.747598	0.773564
GRMZM2G025281_P02	0.64385	0.634648	0.696412	0.652565	0.545822	0.56456	0.59427	0.667873
GRMZM2G088162_P01	0.404098	0.438252	0.409225	0.441569	0.390568	0.423225	0.394074	0.432322
GRMZM2G150262_P01	0.770484	0.753625	0.776209	0.78515	0.693845	0.75755	0.690102	0.773035
GRMZM2G359102_P01	0.421696	0.41093	0.391145	0.404145	0.430954	0.42849	0.41378	0.432193
GRMZM6G748721_P01	0.573844	0.529267	0.563357	0.574632	0.6063	0.568173	0.641321	0.609773
GRMZM2G039419_P01	0.613758	0.77102	0.566275	0.791983	0.595957	0.66724	0.666021	0.661078
GRMZM2G106531_P01	1.59761	1.55512	0.758438	0.774176	1.43831	1.39666	0.74294	0.736739
GRMZM2G052908_P01	0.464895	0.496305	0.532776	0.556465	0.464101	0.462125	0.518502	0.50483
GRMZM2G132130_P01	0.517797	0.529717	0.523013	0.557462	0.525856	0.549684	0.569307	0.560498
GRMZM2G127297_P01	0.373263	0.347422	0.372871	0.327714	0.420136	0.35145	0.407332	0.399812
GRMZM5G856966_P01	0.34439	0.487166	0.528088	0.52632	0.375215	0.445129	0.464262	0.496096
GRMZM5G850904_P01	0.476126	0.510549	0.534398	0.689733	0.442552	0.481813	0.584225	0.613937
GRMZM2G152438_P01	0.62693	0.620539	0.646419	0.651415	0.587907	0.586386	0.627125	0.65328
GRMZM2G021406_P01	1.00688	1.04914	0.665587	0.708731	0.957793	0.952975	0.645573	0.679987
GRMZM2G024267_P01	0.441027	0.379529	0.42619	0.383244	0.431244	0.401584	0.428955	0.441559
GRMZM2G140339_P01	0.619364	0.601049	0.715595	0.703594	0.530741	0.540663	0.638418	0.650575
GRMZM2G139193_P01	0.56823	0.475577	0.498299	0.433638	0.524258	0.51854	0.467271	0.514186
GRMZM2G123540_P01	0.271869	0.303353	0.279646	0.328348	0.2691	0.281981	0.293586	0.30545
GRMZM2G049155_P01	0.457732	0.450729	0.499475	0.44745	0.431245	0.42088	0.475266	0.483889
GRMZM2G009346_P01	0.329264	0.410643	0.346296	0.404537	0.345621	0.357787	0.392457	0.413396
GRMZM2G326677_P01	0.672402	0.687263	0.661997	0.686116	0.61831	0.646554	0.669357	0.691335
GRMZM2G071304_P01	0.59718	0.658131	0.634531	0.6629	0.594038	0.611442	0.598203	0.643576
GRMZM2G053839_P01	0.569278	0.616122	0.529586	0.62462	0.518111	0.587599	0.598052	0.623298
GRMZM2G057983_P01	0.405479	0.402473	0.422696	0.395288	0.410527	0.429748	0.435906	0.431217
GRMZM2G394450_P01	0.444766	0.471567	0.496195	0.470999	0.424969	0.429385	0.440298	0.488489
GRMZM2G152975_P01	1.42958	1.67077	0.659529	0.729153	1.00638	1.22837	0.621933	0.654279
GRMZM2G402092_P01	0.735452	0.665612	0.93849	0.82568	0.771149	0.678711	0.899321	0.818919
GRMZM2G055992_P01	0.376062	0.427366	0.425173	0.44381	0.380173	0.399834	0.439705	0.441211
GRMZM2G083309_P01	0.632768	0.62987	0.633797	0.640243	0.598054	0.591791	0.630254	0.643223
GRMZM2G159404_P01	0.446179	0.443799	0.485512	0.467404	0.449465	0.446408	0.428297	0.499604
GRMZM2G126552_P01	0.826413	0.882672	0.690161	0.706566	0.772645	0.797607	0.653527	0.670407
GRMZM2G006468_P03	0.51641	0.443956	0.451994	0.475947	0.524751	0.528622	0.518275	0.540046
GRMZM2G077662_P02	0.530057	0.632861	0.482536	0.606847	0.534672	0.562828	0.502987	0.480544
GRMZM2G069816_P01	0.546832	0.621994	0.568439	0.671379	0.511659	0.568732	0.587105	0.590526
GRMZM2G137077_P01	0.453135	0.388879	0.506012	0.432707	0.483282	0.458523	0.456613	0.487517
GRMZM2G074781_P01	0.445397	0.483492	0.434264	0.472669	0.411695	0.4595	0.466784	0.492867
GRMZM2G005256_P02	0.356767	0.39697	0.42329	0.509274	0.380942	0.360565	0.448638	0.456886
GRMZM2G140737_P01	0.635332	0.666253	0.572264	0.62322	0.631689	0.625433	0.59788	0.64793
GRMZM2G164018_P01	0.336447	0.365133	0.378725	0.44414	0.326727	0.33934	0.413286	0.396201
GRMZM2G075744_P01	0.445198	0.483722	0.477281	0.494533	0.40258	0.458284	0.429625	0.475445
GRMZM2G073934_P01	0.522156	0.535898	0.550116	0.580892	0.531517	0.510037	0.538594	0.564125
GRMZM2G045135_P01	0.960056	0.984238	0.808647	0.860783	0.915994	0.907301	0.767837	0.795144
GRMZM2G080041_P01	0.458241	0.523283	0.483113	0.449431	0.41526	0.447073	0.417886	0.472379
GRMZM2G102681_P01	0.48046	0.440196	0.555288	0.500383	0.517713	0.494125	0.49742	0.514416
GRMZM2G180471_P01	0.644501	0.594853	0.657884	0.576617	0.668487	0.575504	0.625739	0.656414
GRMZM2G140970_P01	0.783588	0.797236	0.735827	0.756312	0.742924	0.768913	0.718506	0.696695
GRMZM2G353024_P01	0.55043	0.590611	0.528341	0.556527	0.549375	0.570806	0.510026	0.477217
GRMZM2G397759_P01	0.69196	0.919929	0.549029	0.736975	0.623492	0.667635	0.604967	0.539347
GRMZM2G020653_P01	0.36392	0.366303	0.373436	0.380924	0.365642	0.364803	0.395016	0.389955
EF517601.1_FGP015	0.614222	0.611468	0.631678	0.603066	0.636504	0.610535	0.626441	0.666087
GRMZM2G472231_P01	0.319282	0.342952	0.383207	0.408135	0.357813	0.36651	0.411846	0.410256
GRMZM2G054537_P01	0.578062	0.623252	0.648016	0.662949	0.559797	0.624728	0.653889	0.649306
GRMZM2G151738_P01	0.50879	0.431674	0.468876	0.401493	0.465312	0.44478	0.45445	0.491291
GRMZM2G007928_P01	0.339904	0.357277	0.474745	0.394387	0.349295	0.437876	0.507407	0.472442
GRMZM2G127665_P01	0.449987	0.473743	0.481395	0.464003	0.434254	0.446278	0.456801	0.460206
GRMZM2G062591_P02	0.37968	0.350272	0.367717	0.351082	0.384924	0.403994	0.36001	0.402322
GRMZM2G146190_P01	0.463714	0.490067	0.482499	0.482917	0.481512	0.516931	0.534073	0.548286
GRMZM2G169458_P01	0.574599	1.059	0.607414	1.09684	0.495027	0.627398	0.590223	0.616163
GRMZM2G172357_P01	0.480173	0.518882	0.569475	0.566511	0.509912	0.500918	0.614105	0.573358
GRMZM2G002130_P01	0.468544	0.516361	0.522743	0.594959	0.452609	0.451618	0.463973	0.529194
GRMZM2G146020_P02	0.461314	0.565576	0.552168	0.523335	0.546064	0.56078	0.561789	0.562307
GRMZM2G121269_P01	0.365144	0.391096	0.384983	0.428885	0.331834	0.334861	0.35863	0.404568
GRMZM2G054896_P01	0.539863	0.459109	0.551156	0.516931	0.490586	0.468919	0.460203	0.513232
GRMZM2G160994_P01	0.775078	0.83514	0.73115	0.839124	0.74621	0.80164	0.799748	0.805243
GRMZM2G362413_P01	0.409897	0.465708	0.374357	0.440096	0.376196	0.412859	0.421886	0.432334
GRMZM2G017351_P01	0.472603	0.475332	0.466194	0.419888	0.477149	0.431755	0.491909	0.431838
GRMZM2G102786_P01	0.718056	0.677012	0.55324	0.521001	0.750695	0.688002	0.545523	0.54647
GRMZM2G059353_P01	0.492625	0.569399	0.499341	0.584147	0.550288	0.548281	0.533922	0.555331
GRMZM2G013814_P01	0.35261	0.402272	0.351633	0.409542	0.334903	0.388086	0.355293	0.405662
AC205703.4_FGP010	0.618563	0.647384	0.642442	0.657107	0.597559	0.581322	0.609607	0.646016
GRMZM2G112640_P01	0.480931	0.486979	0.503026	0.548276	0.447577	0.470664	0.524924	0.53762
GRMZM2G181568_P01	0.316443	0.319873	0.309453	0.336805	0.347546	0.335198	0.367223	0.334125
GRMZM6G828652_P01	0.546382	0.461028	0.540319	0.488026	0.591984	0.528113	0.59195	0.585532
GRMZM2G444034_P01	0.562573	0.632308	0.597139	0.718574	0.592139	0.633258	0.619959	0.64405
GRMZM2G124047_P02	0.544983	0.471919	0.552347	0.510154	0.601838	0.480632	0.574045	0.597416
GRMZM2G038512_P02	0.282671	0.279888	0.302691	0.305639	0.269641	0.286056	0.293356	0.31339
[truncated: 4,635 more rows]
