# Supplementary material for: Comparative Proteomics Combined with Morphophysiological Analysis Revealed Chilling Response Patterns in Two Contrasting Maize Genotypes
Source: Cells. 2022 Apr 13;11(8):1321. doi: 10.3390/cells11081321 (PMC9024610; doi:10.3390/cells11081321)
Supplement: Supplementary file 1 [file cells-11-01321-s001.zip › Table S5.xlsx]

## Sheet: FC-Abundance
Supplemental table S5
The fold change ratio (abundance) of proteins in the tolerant line KR701 and sensitive line hei8834 at the first leaf and third leaf stage.
Accession Number	first leaf stage		third leaf stage
	KR701-Abundance-(+)/(-)	hei8834-Abundance-(+)/(-)	KR701-Abundance-(+)/(-)	hei8834-Abundance-(+)/(-)
GRMZM2G075502_P01	0.476319	0.510506	0.607097	0.742262
GRMZM2G069911_P01	0.655197	0.632878	0.524858	0.68302
GRMZM2G014695_P01	0.463294	0.646176	0.598739	0.641713
AC209898.2_FGP004	0.496546	0.482968	0.721965	0.582367
GRMZM2G130053_P01	0.692555	0.607097	0.747425	0.920188
GRMZM2G070167_P01	0.712025	0.607097	0.768438	0.888843
GRMZM2G168552_P01	0.624165	0.624165	0.692555	0.773782
GRMZM2G094990_P01	0.707107	0.692555	0.742262	0.784584
GRMZM2G003762_P03	0.692555	0.697372	0.752623	0.840896
GRMZM2G147279_P01	0.742262	0.732043	0.76313	0.817902
GRMZM2G090595_P01	0.712025	0.76313	0.752623	0.97942
GRMZM2G009025_P01	0.768438	0.742262	0.732043	0.907519
GRMZM5G801949_P02	0.757858	0.784584	0.757858	1
GRMZM2G064096_P01	0.737135	0.790041	0.747425	0.959264
GRMZM2G120587_P01	0.742262	0.864537	0.76313	0.97942
GRMZM2G103668_P01	0.570382	0.888843	0.373712	0.876606
GRMZM2G353276_P01	0.757858	0.895025	0.692555	1.06437
GRMZM2G018716_P01	0.752623	0.926588	0.532185	0.895025
GRMZM2G178645_P01	0.641713	0.933033	0.395021	0.888843
GRMZM2G175401_P01	0.659754	0.528509	0.920188	0.795536
GRMZM2G014902_P01	0.641713	0.562529	0.870551	0.876606
GRMZM2G071450_P01	0.752623	0.61132	0.790041	0.993092
GRMZM5G855347_P02	0.624165	0.632878	0.806642	0.795536
GRMZM6G397851_P01	0.726986	0.664343	0.823591	0.913831
GRMZM2G070011_P01	0.578344	0.68302	0.779165	0.913831
GRMZM2G126261_P01	0.742262	0.687771	0.80107	0.993092
GRMZM2G139643_P01	0.615572	0.692555	0.835088	1.09429
GRMZM2G079759_P01	0.702222	0.702222	0.779165	0.965936
GRMZM2G104481_P01	0.607097	0.712025	0.817902	1.04972
AC197758.3_FGP004	0.732043	0.712025	0.913831	0.972655
GRMZM2G175562_P02	0.747425	0.712025	0.852635	0.986233
GRMZM2G134846_P01	0.619854	0.716978	0.80107	0.933033
GRMZM2G167356_P02	0.712025	0.732043	0.870551	1.09429
GRMZM5G875238_P01	0.737135	0.752623	0.817902	0.965936
GRMZM2G175989_P01	0.721965	0.76313	0.773782	0.882703
GRMZM2G057186_P01	0.721965	0.768438	0.986233	0.882703
GRMZM2G091456_P01	0.726986	0.768438	0.858565	0.913831
GRMZM2G337113_P02	0.712025	0.779165	0.846745	0.97942
GRMZM5G805485_P01	0.732043	0.779165	0.80107	1.02811
GRMZM5G845611_P01	0.76313	0.779165	0.806642	0.933033
GRMZM2G139300_P01	0.697372	0.784584	0.846745	1.04972
GRMZM2G320399_P01	0.752623	0.784584	0.939523	0.846745
GRMZM2G086763_P01	0.650671	0.790041	0.823591	1.02811
GRMZM2G059191_P01	0.707107	0.80107	0.846745	0.952638
GRMZM2G025882_P01	0.742262	0.80107	0.858565	0.952638
GRMZM5G874448_P01	0.673617	0.806642	0.852635	0.946058
GRMZM2G073861_P03	0.742262	0.806642	0.946058	0.986233
GRMZM2G047592_P02	0.752623	0.806642	0.858565	1
GRMZM2G394500_P01	0.68302	0.812252	0.82932	0.97942
GRMZM2G100747_P01	0.768438	0.812252	0.80107	1.07177
GRMZM2G101117_P01	0.668964	0.817902	0.920188	1.04247
GRMZM2G010349_P02	0.697372	0.817902	0.817902	0.888843
GRMZM2G017419_P01	0.757858	0.817902	0.972655	1.02101
GRMZM2G174984_P01	0.673617	0.823591	0.795536	0.895025
GRMZM5G856777_P01	0.726986	0.823591	0.90125	0.993092
GRMZM2G112337_P02	0.737135	0.823591	0.812252	0.97942
GRMZM2G024391_P01	0.742262	0.823591	0.82932	0.907519
GRMZM2G102737_P01	0.752623	0.823591	1.00696	0.986233
AC231745.1_FGP003	0.757858	0.823591	0.858565	1.04972
GRMZM2G087918_P01	0.747425	0.82932	0.920188	0.972655
GRMZM2G081583_P02	0.76313	0.82932	0.846745	1.01396
GRMZM2G137648_P01	0.752623	0.835088	0.882703	0.986233
GRMZM2G161306_P01	0.76313	0.846745	0.835088	0.972655
GRMZM2G306732_P01	0.742262	0.864537	0.895025	1.03526
GRMZM2G133434_P01	0.712025	0.876606	0.939523	0.920188
GRMZM2G114588_P01	0.732043	0.876606	0.806642	0.939523
GRMZM2G148090_P02	0.76313	0.876606	0.939523	0.82932
GRMZM2G016622_P02	0.697372	0.888843	0.933033	0.972655
GRMZM2G361064_P01	0.742262	0.895025	0.946058	1.02811
GRMZM2G034302_P01	0.76313	0.895025	0.858565	1
GRMZM2G038973_P01	0.76313	0.895025	0.858565	0.959264
GRMZM2G329047_P01	0.646176	0.90125	0.817902	0.90125
GRMZM2G337242_P01	0.702222	0.90125	0.823591	0.939523
GRMZM2G026980_P01	0.76313	0.907519	0.946058	1.13288
GRMZM2G122853_P01	0.76313	0.907519	0.920188	0.97942
GRMZM2G059129_P01	0.768438	0.926588	0.773782	0.972655
GRMZM2G038281_P02	0.768438	0.933033	0.946058	1.03526
GRMZM2G377855_P01	0.757858	0.946058	0.888843	0.946058
GRMZM2G170400_P01	0.768438	0.965936	1.01396	0.812252
GRMZM2G027479_P01	1.56917	1.3566	1.69349	1.36604
GRMZM2G010868_P01	1.44393	1.37554	1.70527	1.46409
GRMZM2G403007_P01	1.33793	1.38511	1.76541	1.67018
GRMZM5G898755_P01	1.84038	2.20381	1.50525	1.60214
GRMZM2G011523_P01	1.40444	1.23971	1.90528	1.33793
GRMZM2G075283_P01	1.87905	1.77769	1.14076	1.6245
GRMZM2G450498_P01	1.47427	1.10957	1.11729	1.33793
GRMZM2G180654_P02	1.48452	1.40444	1.00696	0.737135
GRMZM2G408768_P01	1.33793	1.46409	1.11729	0.721965
GRMZM2G100225_P01	1.42405	1.46409	1.12506	0.757858
GRMZM2G010196_P01	1.95884	1.61328	1.21419	0.768438
GRMZM2G032315_P01	1.44393	1.65864	1.14076	0.76313
GRMZM2G344634_P01	1.31039	0.993092	1.01396	0.737135
GRMZM2G075839_P01	1.33793	1.14076	1.02101	0.747425
GRMZM2G096247_P01	1.37554	1.27456	0.965936	0.726986
GRMZM2G004699_P01	1.30134	1.30134	1.30134	1.15669
GRMZM2G109130_P01	1.61328	1.31039	1.31951	1.02101
GRMZM2G043336_P01	1.38511	1.32869	1.46409	1.03526
GRMZM2G359018_P01	1.48452	1.33793	1.48452	0.993092
GRMZM2G063287_P01	1.6358	1.36604	1.43396	1.14076
GRMZM2G118362_P01	1.46409	1.37554	1.36604	1.08673
GRMZM2G139786_P01	1.6245	1.40444	1.37554	0.946058
GRMZM2G447632_P01	1.49485	1.43396	1.31951	0.97942
GRMZM2G142413_P01	1.56917	1.44393	1.67018	0.812252
GRMZM2G350319_P02	1.39474	1.61328	1.41421	0.823591
GRMZM2G160541_P02	1.61328	2.07053	1.33793	0.926588
AC215244.3_FGP002	1.34723	0.846745	1.42405	0.972655
GRMZM2G107839_P01	1.45397	0.946058	1.33793	0.986233
GRMZM2G172274_P01	1.43396	0.97942	1.50525	1.03526
GRMZM2G098237_P01	1.53688	0.993092	1.58008	1
GRMZM2G171588_P01	1.37554	1.02101	1.3566	1.04247
AC217499.3_FGP003	1.33793	1.02811	1.41421	0.806642
GRMZM2G112524_P02	1.34723	1.06437	1.41421	1.08673
GRMZM2G096475_P01	1.44393	1.06437	1.8025	1.01396
GRMZM2G145280_P01	1.54756	1.07923	1.6358	1.14076
GRMZM2G156632_P01	1.45397	1.09429	1.40444	1.21419
GRMZM2G004768_P01	1.3566	1.10191	1.61328	0.965936
GRMZM2G114552_P04	1.56917	1.10191	1.47427	1.10957
GRMZM2G059039_P01	1.30134	1.10957	1.33793	0.97942
GRMZM2G162688_P01	1.3566	1.11729	1.33793	0.972655
GRMZM2G103197_P01	1.37554	1.13288	1.44393	1.04247
GRMZM2G134806_P01	1.42405	1.13288	1.61328	0.888843
GRMZM2G033653_P01	1.34723	1.1487	1.3566	0.993092
GRMZM2G070863_P01	1.37554	1.15669	1.31039	0.913831
GRMZM2G325575_P01	1.46409	1.16473	1.34723	1.10957
GRMZM2G154523_P01	1.79005	1.17283	1.31951	1.07923
GRMZM2G445958_P01	1.37554	1.18921	1.36604	1.07923
GRMZM2G112805_P01	1.6245	1.18921	1.79005	0.952638
GRMZM2G355752_P01	1.85318	1.19748	1.50525	1.06437
GRMZM5G826979_P01	1.34723	1.20581	1.31039	1.05702
AC148152.3_FGP005	1.82766	1.20581	1.46409	1.05702
GRMZM2G002786_P01	1.31951	1.22264	1.31039	0.90125
GRMZM2G112488_P01	1.3566	1.23971	1.32869	1.10957
GRMZM2G009030_P01	1.48452	1.23971	1.31039	1.05702
GRMZM2G083253_P02	1.51572	1.25701	1.60214	1.09429
GRMZM2G163421_P01	1.51572	1.25701	1.3566	0.946058
GRMZM2G429955_P01	1.64718	1.40444	1.51572	0.907519
GRMZM2G053669_P01	1.56917	0.993092	0.707107	1.07923
GRMZM2G051943_P01	1.47427	1.1487	0.757858	1.02811
GRMZM6G639283_P01	1.33793	1.30134	1.07923	0.926588
GRMZM2G058057_P01	1.34723	1.30134	1.14076	0.926588
GRMZM2G152466_P01	1.3566	1.30134	1.12506	0.946058
GRMZM2G371375_P01	1.3566	1.30134	1.22264	1.13288
GRMZM2G408305_P02	1.37554	1.30134	1.11729	1.06437
GRMZM2G042683_P01	1.38511	1.30134	1.12506	1.10191
GRMZM2G465169_P02	1.38511	1.30134	1.29235	1.08673
GRMZM2G124963_P01	1.39474	1.30134	1.26576	1.06437
GRMZM2G021794_P01	1.51572	1.30134	1.27456	1.12506
GRMZM2G110233_P01	1.30134	1.31039	1.21419	1.11729
GRMZM2G010801_P02	1.31951	1.31039	1.15669	1.02101
GRMZM2G397759_P01	1.3566	1.31039	1.07923	0.895025
GRMZM2G023242_P04	1.36604	1.31039	1.15669	0.876606
GRMZM2G139874_P01	1.36604	1.31039	1.1487	0.965936
GRMZM2G123624_P01	1.39474	1.31039	1.19748	0.972655
GRMZM2G180399_P01	1.40444	1.31039	1.14076	0.986233
GRMZM2G438386_P01	1.42405	1.31039	1.10957	1.10957
GRMZM2G005980_P01	1.30134	1.31951	1.11729	0.90125
GRMZM2G060561_P02	1.30134	1.31951	1.11729	0.993092
GRMZM2G059449_P01	1.32869	1.31951	1.14076	0.920188
GRMZM2G119219_P03	1.38511	1.31951	1.04972	1.01396
GRMZM2G155329_P01	1.39474	1.31951	1.16473	0.946058
GRMZM2G089713_P07	1.44393	1.31951	1.13288	1.06437
GRMZM2G127963_P01	1.45397	1.31951	1	0.986233
GRMZM2G060947_P01	1.31039	1.32869	1.20581	1.07923
GRMZM2G445057_P03	1.31951	1.32869	1.18921	1.04972
GRMZM2G445602_P01	1.31951	1.32869	1.14076	1.00696
GRMZM2G009464_P01	1.32869	1.32869	1.1487	1.10191
GRMZM2G050501_P01	1.33793	1.32869	1.12506	1.14076
GRMZM2G051677_P01	1.33793	1.32869	1.15669	1.07923
GRMZM2G365160_P01	1.34723	1.32869	1.17283	1.02811
GRMZM2G304362_P01	1.3566	1.32869	1.20581	1.04972
GRMZM2G430600_P02	1.3566	1.32869	1.08673	0.817902
GRMZM2G128564_P01	1.36604	1.32869	1.12506	1
GRMZM2G702426_P01	1.40444	1.32869	1.21419	0.870551
GRMZM2G156861_P02	2.01391	1.32869	1.27456	1.14076
GRMZM2G071360_P01	1.31039	1.33793	1.27456	1.09429
GRMZM2G044629_P01	1.33793	1.33793	1.18099	0.993092
GRMZM2G105712_P06	1.3566	1.33793	1.19748	1.00696
GRMZM2G128171_P03	1.36604	1.33793	1.05702	0.895025
GRMZM5G807835_P01	1.36604	1.33793	1.10957	0.986233
GRMZM2G116427_P01	1.39474	1.33793	1.24833	0.933033
GRMZM2G043291_P02	1.40444	1.33793	1.12506	0.806642
GRMZM2G134398_P02	1.40444	1.33793	1.16473	1.04247
AC197246.3_FGP001	1.46409	1.33793	1.12506	1.07177
GRMZM2G017269_P01	1.34723	1.34723	1.12506	0.965936
GRMZM2G028986_P01	1.3566	1.34723	1.17283	0.876606
GRMZM2G042502_P01	1.39474	1.34723	1.18099	1.06437
GRMZM2G157296_P01	1.41421	1.34723	1.17283	0.882703
GRMZM2G090500_P01	1.46409	1.34723	1.12506	1.04972
GRMZM2G138527_P01	1.48452	1.34723	1.13288	0.82932
GRMZM2G053397_P01	1.30134	1.3566	1.16473	1.04972
GRMZM2G021567_P01	1.31951	1.3566	1.22264	0.90125
GRMZM2G178807_P01	1.34723	1.3566	1.04972	0.806642
GRMZM2G081144_P01	1.32869	1.36604	1.11729	0.852635
GRMZM2G123714_P01	1.3566	1.36604	1.03526	1.02101
GRMZM2G071518_P01	1.38511	1.36604	1.06437	1.00696
GRMZM2G140545_P01	1.42405	1.36604	1.1487	0.946058
GRMZM2G144387_P03	1.31951	1.37554	1.13288	0.870551
GRMZM2G165944_P01	1.31951	1.37554	1.17283	1.03526
GRMZM2G145175_P02	1.38511	1.37554	1.08673	0.840896
GRMZM2G098496_P02	1.41421	1.37554	1.08673	0.858565
GRMZM2G181542_P01	1.45397	1.37554	1.03526	0.784584
GRMZM2G101446_P01	1.49485	1.37554	1.04247	0.82932
GRMZM2G094051_P03	1.31039	1.38511	1.11729	0.795536
GRMZM2G141707_P01	1.31039	1.38511	1.10191	0.876606
GRMZM2G159369_P01	1.36604	1.38511	1.26576	0.986233
GRMZM2G110023_P01	1.30134	1.39474	1.10957	0.90125
GRMZM2G031545_P02	1.31039	1.39474	1.07923	0.858565
GRMZM2G098239_P01	1.31951	1.39474	1.17283	1.03526
GRMZM2G001514_P01	1.33793	1.39474	1.23971	1.14076
GRMZM2G168898_P01	1.34723	1.39474	1.05702	0.888843
GRMZM2G146246_P02	1.43396	1.40444	1.06437	0.812252
GRMZM2G152686_P01	1.45397	1.41421	1.13288	1.04972
GRMZM2G035477_P01	1.32869	1.42405	1.20581	0.939523
GRMZM2G075701_P01	1.32869	1.42405	1.12506	1.05702
GRMZM2G115615_P01	1.36604	1.42405	1.19748	0.926588
GRMZM2G452523_P01	1.39474	1.42405	1.06437	1.01396
GRMZM2G127648_P01	1.40444	1.42405	1.24833	1.00696
GRMZM2G157018_P01	1.31039	1.43396	1.15669	0.870551
GRMZM2G443495_P05	1.31951	1.43396	1.16473	1.07177
GRMZM2G137961_P01	1.32869	1.43396	1.18099	1.02811
GRMZM2G330635_P01	1.38511	1.43396	1.25701	0.972655
GRMZM2G396540_P01	1.42405	1.43396	1.1487	1.04972
AC155610.2_FGP007	1.47427	1.43396	1.07177	1.04972
GRMZM2G085661_P01	1.65864	1.43396	1.03526	1.05702
GRMZM2G101875_P01	1.41421	1.44393	1.18099	1.01396
GRMZM2G049269_P01	1.42405	1.44393	1.16473	1.02811
GRMZM5G850455_P02	1.43396	1.44393	1.04247	0.972655
GRMZM2G139123_P01	1.48452	1.44393	1.22264	0.907519
GRMZM2G391627_P01	1.48452	1.44393	1.24833	1.09429
GRMZM2G084958_P01	1.6358	1.44393	1.07923	1.01396
GRMZM2G134862_P01	1.31951	1.45397	1.18921	0.835088
GRMZM2G044027_P02	1.46409	1.45397	1.18099	1.01396
GRMZM2G078641_P01	1.53688	1.45397	1.02101	0.795536
GRMZM2G115766_P01	1.6245	1.45397	1.19748	0.882703
GRMZM2G147849_P01	1.30134	1.46409	1.18921	0.959264
GRMZM2G028929_P02	1.43396	1.46409	1.08673	0.920188
GRMZM2G102356_P01	1.47427	1.46409	1.26576	1.07177
GRMZM5G868062_P04	1.47427	1.46409	1.1487	0.870551
GRMZM2G015603_P01	1.58008	1.46409	1.11729	1.09429
GRMZM5G868433_P01	1.40444	1.47427	1.17283	0.806642
GRMZM5G864424_P01	1.41421	1.47427	1.11729	0.858565
GRMZM2G178341_P01	1.43396	1.47427	1.23971	0.952638
GRMZM2G071790_P05	1.46409	1.47427	1.11729	0.946058
GRMZM2G153823_P01	1.49485	1.47427	1.19748	0.933033
GRMZM2G043737_P01	1.38511	1.48452	1.28343	0.779165
GRMZM2G301908_P01	1.34723	1.49485	1.12506	1.06437
GRMZM2G026371_P01	1.39474	1.50525	1.13288	0.972655
GRMZM2G062396_P01	1.46409	1.50525	1.14076	0.972655
GRMZM2G114642_P01	1.41421	1.52626	1.15669	0.97942
GRMZM2G005938_P01	1.44393	1.52626	1.20581	0.907519
GRMZM2G441347_P01	1.60214	1.53688	1.23971	0.97942
GRMZM2G062481_P01	1.65864	1.55833	1.12506	0.888843
GRMZM2G140809_P01	1.59107	1.56917	1.25701	0.864537
GRMZM2G127948_P01	1.69349	1.56917	1.20581	0.852635
GRMZM2G126580_P01	1.32869	1.59107	1.18921	0.965936
GRMZM2G074604_P01	1.72907	1.61328	1.28343	0.965936
GRMZM2G013082_P01	1.7411	1.6245	1	1.1487
GRMZM2G165357_P01	1.7411	1.64718	1.22264	0.939523
GRMZM2G075140_P01	2.05623	1.65864	1.23114	1.04972
GRMZM2G003501_P01	1.58008	1.67018	1.25701	1.02101
GRMZM2G128080_P02	1.36604	1.69349	1.21419	0.82932
GRMZM2G164696_P01	1.67018	1.7411	1.04972	0.952638
GRMZM2G158205_P01	1.40444	1.75321	1.06437	1.04972
GRMZM2G169458_P01	1.82766	1.8025	1.25701	1.04247
AC217050.4_FGP006	1.87905	1.8025	1.21419	0.858565
GRMZM2G152908_P01	1.93187	2.01391	1.27456	1.10957
GRMZM2G009188_P01	2.12874	2.14355	1.07177	1.11729
GRMZM6G132224_P01	1.93187	2.15846	1.16473	1
GRMZM5G803318_P03	1.37554	0.752623	1.28343	0.97942
GRMZM5G884242_P04	1.30134	0.835088	1.29235	0.993092
GRMZM2G107872_P02	1.31951	0.926588	1.18921	0.926588
GRMZM2G149422_P01	1.43396	0.946058	1.11729	0.993092
GRMZM2G000326_P02	1.31039	0.952638	1.10957	1
GRMZM2G019251_P02	1.31951	0.952638	1.18921	0.926588
GRMZM2G167549_P03	1.45397	0.952638	0.939523	0.852635
GRMZM5G876285_P02	1.31951	0.959264	1.07923	1.08673
GRMZM2G024099_P01	1.38511	0.965936	1.16473	1.07923
GRMZM2G106690_P01	1.39474	0.972655	0.959264	1.01396
GRMZM2G165966_P01	1.30134	0.986233	1.01396	0.986233
GRMZM2G089836_P01	1.38511	0.993092	0.986233	0.993092
GRMZM5G856966_P01	1.44393	1.00696	1.18099	1.07177
GRMZM2G097021_P01	1.43396	1.01396	1.14076	1.11729
GRMZM2G165815_P02	1.30134	1.02101	1.02101	0.907519
GRMZM2G063850_P01	1.32869	1.02101	1.24833	1.01396
GRMZM2G026147_P03	1.31951	1.02811	1.03526	1
GRMZM2G124317_P01	1.38511	1.02811	1.11729	0.97942
GRMZM2G134176_P01	1.30134	1.04247	1.04247	1.01396
GRMZM2G102183_P02	1.36604	1.05702	1.10957	1.09429
GRMZM2G110567_P01	1.33793	1.06437	1.26576	1.00696
GRMZM2G071089_P01	1.36604	1.07177	1.19748	0.907519
AC199526.5_FGP002	1.39474	1.07177	1.03526	1.04247
GRMZM2G119705_P01	1.41421	1.08673	0.97942	1
GRMZM2G360021_P01	1.51572	1.09429	1.1487	0.895025
GRMZM2G123940_P01	1.3566	1.10957	0.965936	1.07923
GRMZM2G110726_P01	1.34723	1.11729	1.10191	0.895025
GRMZM6G910222_P01	1.52626	1.11729	1.11729	0.993092
GRMZM2G152417_P01	1.44393	1.12506	1.13288	1.07923
GRMZM2G115245_P01	1.31951	1.13288	1.19748	0.959264
GRMZM2G054123_P04	1.3566	1.13288	1.22264	1.07177
GRMZM2G438551_P02	1.39474	1.13288	1.05702	1
GRMZM2G149317_P01	1.38511	1.14076	1.15669	1.06437
GRMZM2G174906_P02	1.39474	1.14076	1.14076	0.97942
GRMZM2G161506_P01	1.45397	1.14076	1.28343	1.07177
GRMZM2G137352_P01	1.31951	1.1487	1.10957	0.933033
GRMZM6G007923_P01	1.34723	1.1487	1.1487	1.06437
GRMZM2G017957_P02	1.41421	1.1487	1.12506	0.876606
GRMZM2G125268_P01	1.52626	1.1487	1.00696	1.23971
GRMZM2G024159_P02	1.37554	1.15669	1.20581	1
GRMZM2G157729_P01	1.31039	1.16473	1.08673	0.926588
GRMZM2G039089_P03	1.36604	1.16473	1.11729	1.02101
GRMZM2G382673_P01	1.45397	1.16473	1.07923	0.876606
GRMZM2G171484_P01	1.31039	1.17283	1.28343	0.959264
GRMZM2G452633_P01	1.31039	1.17283	1.10191	1.04972
GRMZM2G166767_P02	1.37554	1.17283	1.17283	1.01396
GRMZM2G016836_P01	1.38511	1.17283	1.18921	1.01396
GRMZM2G129761_P01	1.47427	1.17283	1.21419	1.03526
GRMZM2G159250_P01	1.32869	1.18099	1.28343	0.835088
GRMZM6G810942_P01	1.37554	1.18099	1.07923	1.04972
GRMZM2G009479_P01	1.39474	1.18099	1.26576	1.10957
GRMZM2G005493_P01	1.45397	1.18099	1.29235	1.01396
GRMZM2G157384_P01	1.31039	1.18921	1.14076	1.09429
GRMZM2G334899_P01	1.31951	1.18921	1.05702	1.04247
GRMZM2G439950_P02	1.31951	1.18921	1.10957	0.952638
GRMZM2G439201_P02	1.3566	1.18921	1.10957	0.959264
GRMZM2G014750_P01	1.38511	1.18921	1.20581	1.06437
GRMZM2G070716_P02	1.38511	1.18921	1.10191	0.952638
GRMZM2G059965_P01	1.40444	1.18921	1.17283	0.882703
GRMZM2G063756_P01	1.31951	1.19748	1.09429	0.952638
GRMZM2G096962_P02	1.31951	1.19748	1.14076	0.895025
GRMZM2G063340_P04	1.33793	1.19748	1.11729	0.972655
GRMZM2G094595_P03	1.33793	1.19748	1.05702	0.920188
GRMZM2G084149_P01	1.36604	1.19748	1.16473	1.01396
GRMZM2G324886_P01	1.36604	1.19748	1.15669	0.993092
GRMZM6G617209_P01	1.36604	1.19748	1.22264	1
GRMZM2G093272_P01	1.40444	1.19748	1.06437	0.959264
GRMZM2G043903_P02	1.37554	1.20581	1.20581	0.90125
GRMZM2G171452_P01	1.38511	1.20581	1.06437	0.946058
GRMZM2G003853_P01	1.30134	1.21419	1.12506	1.03526
GRMZM2G047486_P01	1.31039	1.21419	1.01396	0.920188
GRMZM2G348909_P01	1.42405	1.21419	1.18921	0.97942
GRMZM2G388892_P01	1.31951	1.22264	1.14076	0.965936
GRMZM2G075655_P01	1.36604	1.22264	1.18099	1.03526
GRMZM2G117707_P02	1.36604	1.22264	1.18921	1.01396
GRMZM2G384338_P01	1.6245	1.22264	1.24833	1.10957
GRMZM2G093405_P06	1.31039	1.23114	1.15669	0.920188
GRMZM2G098212_P01	1.31039	1.23114	1.16473	0.986233
GRMZM2G119773_P01	1.32869	1.23114	1.21419	1.10191
GRMZM2G121456_P01	1.32869	1.23114	1.09429	0.986233
GRMZM2G042008_P01	1.33793	1.23114	1.20581	1.09429
GRMZM5G866082_P02	1.47427	1.23114	1.1487	0.920188
GRMZM2G014076_P01	1.31951	1.23971	1.21419	0.993092
GRMZM2G132461_P02	1.37554	1.23971	1.1487	0.852635
GRMZM2G163641_P01	1.45397	1.23971	1.07177	0.965936
GRMZM2G106424_P01	1.75321	1.23971	1.1487	1.15669
GRMZM2G042639_P04	1.31039	1.24833	1.10191	0.864537
GRMZM2G006006_P01	1.33793	1.24833	1.19748	1
GRMZM2G143627_P02	1.38511	1.24833	1.16473	0.926588
GRMZM2G077596_P01	1.30134	1.25701	1.09429	1.01396
GRMZM2G308687_P01	1.31951	1.25701	1.08673	0.895025
GRMZM2G320521_P01	1.39474	1.25701	1.15669	1.07177
GRMZM2G078933_P01	1.30134	1.26576	1.14076	0.895025
GRMZM2G136513_P01	1.31039	1.26576	1.1487	1.03526
GRMZM2G136680_P01	1.32869	1.26576	1.17283	0.986233
GRMZM2G140342_P01	1.32869	1.26576	1.17283	1.06437
GRMZM2G150697_P01	1.36604	1.26576	1.04247	1.08673
GRMZM2G131943_P03	1.30134	1.27456	1.10191	1.09429
GRMZM2G177812_P01	1.30134	1.27456	1.07923	0.972655
GRMZM2G109967_P02	1.31039	1.27456	1.14076	0.926588
GRMZM2G072911_P01	1.32869	1.27456	1.17283	0.986233
GRMZM2G102903_P02	1.3566	1.27456	1.10957	0.946058
GRMZM2G361569_P01	1.3566	1.27456	1.18921	0.835088
GRMZM2G016890_P01	1.45397	1.27456	1.23971	1.17283
GRMZM2G066860_P03	1.45397	1.27456	1.18921	1.10191
GRMZM2G173128_P01	1.45397	1.27456	1.22264	1.05702
GRMZM2G079196_P01	1.30134	1.28343	1.06437	0.812252
GRMZM2G054136_P09	1.32869	1.28343	1.25701	1.05702
GRMZM5G807767_P03	1.34723	1.28343	1.09429	0.972655
GRMZM2G011219_P01	1.3566	1.28343	1.29235	0.846745
GRMZM2G121683_P01	1.3566	1.28343	1.21419	1.07923
GRMZM2G306104_P01	1.36604	1.28343	1.11729	1.06437
GRMZM2G047093_P01	1.30134	1.29235	1.18921	0.965936
GRMZM2G134230_P01	1.30134	1.29235	1.10957	0.933033
AC203985.4_FGP005	1.31039	1.29235	1.09429	0.926588
GRMZM2G108087_P01	1.31039	1.29235	1.17283	0.933033
GRMZM5G825854_P01	1.31039	1.29235	1.09429	0.993092
AC205703.4_FGP006	1.31951	1.29235	1.09429	1.00696
GRMZM2G149281_P01	1.31951	1.29235	1.12506	1.04247
GRMZM2G155111_P01	1.31951	1.29235	1.17283	1.06437
GRMZM5G868757_P04	1.33793	1.29235	1.06437	0.952638
GRMZM2G157564_P02	1.34723	1.29235	1.09429	1.05702
GRMZM2G091481_P01	1.36604	1.29235	1.10191	0.946058
GRMZM2G034848_P01	1.40444	1.29235	1.12506	1.08673
AC177850.2_FGP005	1.41421	1.29235	1.18099	1.02101
GRMZM2G126682_P01	1.71713	1.29235	1.22264	0.812252
GRMZM2G125032_P01	1.23971	1.32869	0.946058	1.31039
GRMZM2G331566_P02	1.26576	1.39474	1.07923	1.44393
GRMZM2G162353_P03	1.06437	1.07177	1.00696	1.31039
GRMZM2G043878_P01	1.00696	1.15669	0.907519	1.30134
GRMZM2G062076_P02	1	0.594604	1.40444	0.757858
GRMZM2G122937_P03	1.1487	0.993092	1.3566	0.752623
GRMZM2G098460_P01	0.806642	0.806642	0.747425	0.707107
GRMZM2G317451_P01	0.858565	0.664343	0.823591	0.707107
GRMZM5G809292_P02	1.02101	1.33793	0.993092	0.752623
GRMZM2G150791_P01	1.27456	1.38511	1.18921	0.757858
GRMZM2G436986_P01	1.21419	1.47427	1.07923	0.747425
GRMZM2G022958_P01	1	0.779165	0.882703	0.768438
GRMZM2G165919_P01	0.993092	0.939523	0.907519	0.721965
GRMZM2G111200_P01	0.933033	0.952638	0.895025	0.752623
GRMZM2G172491_P01	1.16473	1.00696	0.882703	0.76313
GRMZM2G079908_P01	1.21419	1.02101	1.00696	0.747425
GRMZM2G136306_P01	0.97942	1.02811	0.920188	0.726986
GRMZM2G021617_P01	1.23114	1.03526	1.04247	0.757858
GRMZM2G013652_P01	1.24833	1.03526	1.06437	0.752623
GRMZM2G132000_P03	1.04247	1.05702	1.04972	0.768438
GRMZM2G316665_P01	1.1487	1.07177	1.06437	0.747425
AC234171.1_FGP003	1.16473	1.09429	1.03526	0.76313
GRMZM2G010973_P01	1.04972	1.10957	0.888843	0.716978
GRMZM2G137816_P01	0.972655	1.14076	0.90125	0.757858
GRMZM2G117558_P01	1.20581	1.17283	1	0.747425
GRMZM2G158039_P02	1.12506	1.19748	0.939523	0.737135
GRMZM2G126763_P01	1.23971	1.24833	0.959264	0.68302
GRMZM2G153184_P01	0.972655	1.28343	0.920188	0.721965
GRMZM2G154725_P01	1.04247	0.678302	1.45397	0.888843
GRMZM2G042032_P02	1.15669	0.757858	1.46409	0.870551
GRMZM2G446960_P01	1.25701	1.30134	1.44393	0.926588
GRMZM2G014577_P01	1.20581	1.32869	1.30134	0.907519
GRMZM2G140101_P01	1.28343	1.39474	1.41421	1.10191
GRMZM5G870752_P01	1.23971	1.49485	1.31039	0.97942
GRMZM2G447785_P02	1.25701	0.806642	1.45397	1.04972
GRMZM2G459811_P01	1.09429	0.840896	1.30134	0.986233
GRMZM2G107731_P01	1.22264	0.888843	1.30134	0.920188
GRMZM2G456603_P01	1.08673	0.90125	1.30134	0.90125
GRMZM2G022054_P05	1.02811	0.933033	1.34723	0.986233
GRMZM2G162840_P01	1.13288	0.933033	1.31039	0.90125
GRMZM2G025832_P01	1.10957	0.965936	1.31039	1.03526
GRMZM2G087079_P01	1.23114	0.986233	1.37554	0.952638
GRMZM2G136453_P01	1.07177	1.00696	1.31039	1.05702
GRMZM2G703555_P01	1.23114	1.00696	1.38511	1.02101
GRMZM2G060567_P01	1.16473	1.02101	1.42405	0.895025
GRMZM2G000236_P01	1.21419	1.03526	1.30134	1
GRMZM2G105364_P01	1.1487	1.05702	1.31039	1.07177
GRMZM2G122584_P01	1.20581	1.05702	1.46409	0.913831
GRMZM2G140893_P01	1.08673	1.07177	1.39474	1.06437
GRMZM2G095147_P02	1.17283	1.07923	1.54756	0.864537
GRMZM2G101958_P01	1.19748	1.12506	1.64718	1.20581
GRMZM2G140832_P01	1.03526	1.18099	1.31951	1
GRMZM2G156861_P01	1.67018	1.20581	1.32869	1.17283
GRMZM2G173809_P01	1.09429	1.23114	1.37554	1.20581
GRMZM2G137329_P01	1.01396	1.23971	1.37554	1.10191
GRMZM2G314769_P01	1.16473	1.28343	1.31039	1.20581
GRMZM2G068755_P01	1.13288	1.31951	1.33793	1.26576
GRMZM2G063431_P01	1.17283	0.486327	0.496546	1
GRMZM2G099191_P01	0.959264	0.702222	0.747425	1.06437
GRMZM2G014400_P01	0.888843	0.716978	0.768438	0.82932
GRMZM2G036708_P01	0.779165	0.742262	0.757858	0.817902
GRMZM2G153208_P01	0.80107	1.38511	0.602904	1.11729
GRMZM2G154881_P01	0.840896	0.846745	0.726986	1
GRMZM2G026151_P01	0.972655	0.852635	0.76313	0.946058
GRMZM2G137321_P01	0.907519	0.882703	0.742262	0.907519
GRMZM2G153920_P01	0.817902	0.90125	0.747425	1.07923
GRMZM2G138770_P01	0.972655	0.913831	0.707107	1.02101
GRMZM2G028516_P02	0.82932	0.920188	0.716978	0.972655
GRMZM2G088064_P03	0.784584	0.926588	0.721965	0.895025
AC152495.1_FGP002	0.82932	0.926588	0.742262	0.965936
GRMZM2G028129_P01	0.959264	0.926588	0.716978	1
AC209987.4_FGP010	0.790041	0.939523	0.757858	0.946058
AC210204.3_FGP002	0.959264	0.946058	0.732043	1.06437
GRMZM2G079348_P02	0.895025	0.952638	0.726986	1.03526
GRMZM2G113378_P01	0.907519	0.972655	0.707107	1.13288
GRMZM2G073884_P01	0.795536	0.97942	0.628507	0.913831
GRMZM2G057159_P02	0.846745	0.986233	0.624165	1.00696
GRMZM2G081782_P01	0.926588	1	0.768438	0.972655
GRMZM2G041356_P01	0.779165	1.00696	0.687771	0.965936
GRMZM2G465226_P01	1.05702	1.00696	0.692555	0.907519
GRMZM2G168115_P01	0.870551	1.02811	0.598739	1.02101
GRMZM2G453805_P01	0.795536	1.03526	0.678302	1.11729
GRMZM2G057674_P02	0.90125	1.05702	0.646176	1.17283
GRMZM2G037485_P01	0.895025	1.06437	0.602904	1.04247
GRMZM2G115660_P01	0.907519	1.07177	0.641713	0.972655
GRMZM2G135722_P01	0.913831	1.07177	0.716978	0.933033
GRMZM2G099467_P01	0.952638	1.08673	0.607097	0.959264
GRMZM2G126062_P02	1.07923	1.09429	0.732043	0.965936
GRMZM2G044383_P01	1.12506	1.16473	0.742262	0.97942
GRMZM2G123896_P04	0.926588	0.496546	1.03526	0.773782
GRMZM2G081114_P01	0.806642	0.594604	1.04972	0.858565
GRMZM2G047002_P01	0.806642	0.607097	0.840896	0.959264
GRMZM2G149273_P01	0.913831	0.650671	1	0.946058
GRMZM2G031501_P05	0.939523	0.673617	0.946058	0.870551
GRMZM2G034764_P01	0.812252	0.68302	0.864537	0.986233
GRMZM2G122337_P01	0.846745	0.687771	0.858565	0.993092
GRMZM2G000219_P01	0.939523	0.687771	0.946058	1
GRMZM2G480850_P01	0.812252	0.692555	0.876606	0.882703
GRMZM2G113349_P01	0.835088	0.697372	0.888843	0.959264
GRMZM2G339091_P01	0.882703	0.702222	0.835088	0.993092
GRMZM2G168590_P01	0.933033	0.702222	0.913831	0.946058
GRMZM2G130904_P01	0.812252	0.707107	0.876606	0.926588
GRMZM2G410757_P01	0.882703	0.712025	0.895025	0.876606
GRMZM2G399183_P01	0.895025	0.716978	0.876606	1.00696
GRMZM2G110504_P01	0.939523	0.721965	0.939523	1.04972
GRMZM2G064518_P01	0.784584	0.726986	0.920188	1.00696
GRMZM2G107609_P01	0.82932	0.726986	0.840896	0.876606
GRMZM2G013342_P01	0.888843	0.726986	0.926588	0.913831
GRMZM2G049349_P01	0.913831	0.726986	0.846745	0.846745
GRMZM2G378121_P01	1.13288	0.726986	1.02811	0.864537
GRMZM2G096695_P01	0.858565	0.732043	0.864537	1
GRMZM2G174699_P01	0.946058	0.732043	1	0.895025
GRMZM2G162359_P01	1.00696	0.732043	0.959264	1.04972
GRMZM2G118037_P01	1.11729	0.732043	1.15669	0.90125
GRMZM2G152105_P03	0.823591	0.737135	0.835088	0.864537
GRMZM2G010044_P01	0.870551	0.737135	0.913831	1.09429
GRMZM2G145968_P01	0.895025	0.737135	0.876606	0.939523
GRMZM2G021687_P01	0.965936	0.737135	0.959264	0.852635
GRMZM2G472693_P02	0.784584	0.742262	0.852635	0.97942
GRMZM2G059392_P02	0.846745	0.742262	0.920188	0.840896
AC234522.1_FGP005	0.852635	0.742262	0.933033	1.03526
GRMZM2G106928_P01	0.882703	0.742262	0.858565	0.97942
GRMZM2G076544_P01	0.946058	0.742262	0.913831	0.939523
GRMZM6G101378_P01	0.773782	0.747425	0.806642	0.852635
GRMZM2G068271_P01	0.790041	0.752623	0.790041	0.870551
GRMZM2G127361_P01	0.840896	0.752623	0.882703	1
GRMZM2G130586_P01	0.852635	0.752623	0.852635	0.870551
GRMZM2G481261_P01	0.870551	0.752623	0.870551	1.01396
GRMZM2G174708_P01	0.90125	0.757858	0.97942	1.11729
GRMZM2G162748_P01	0.907519	0.757858	0.939523	0.876606
GRMZM2G055704_P01	0.773782	0.76313	0.858565	0.90125
GRMZM2G009320_P02	0.852635	0.76313	0.913831	0.870551
GRMZM2G167758_P01	0.952638	0.76313	0.876606	0.965936
GRMZM2G135904_P02	1.14076	0.76313	0.870551	1.07923
GRMZM2G080375_P01	0.784584	0.768438	0.858565	1
GRMZM2G336879_P01	0.926588	0.768438	1.01396	1
GRMZM2G099454_P02	0.965936	0.768438	1.02811	1
GRMZM2G063896_P01	1	1.30134	0.933033	0.876606
GRMZM2G100260_P02	1.00696	1.30134	1.12506	1.11729
GRMZM2G070899_P02	1.05702	1.30134	1.13288	0.946058
GRMZM2G035594_P01	1.07177	1.30134	1.1487	0.972655
GRMZM2G000660_P01	1.10957	1.30134	1.03526	0.907519
GRMZM5G820727_P06	1.12506	1.30134	1.07923	0.920188
GRMZM2G025171_P01	1.13288	1.30134	1.07177	0.895025
GRMZM5G883149_P03	1.17283	1.30134	0.939523	1.00696
GRMZM2G144730_P01	1.18099	1.30134	1.02811	1.01396
GRMZM2G033680_P01	1.20581	1.30134	1.05702	0.858565
GRMZM5G819807_P01	1.20581	1.30134	1.1487	0.926588
GRMZM2G053319_P01	1.21419	1.30134	1.09429	0.907519
GRMZM2G363540_P01	1.21419	1.30134	1.18921	0.972655
GRMZM2G084757_P01	1.23971	1.30134	1.20581	1.17283
GRMZM2G302233_P01	1.23971	1.30134	1.10957	1.07177
GRMZM2G052078_P02	1.26576	1.30134	1.15669	1.10191
GRMZM2G359331_P01	1.26576	1.30134	1.19748	0.946058
GRMZM2G077708_P01	1.27456	1.30134	1.17283	0.993092
GRMZM2G336815_P01	1.27456	1.30134	1.10957	0.926588
GRMZM2G168364_P01	1.28343	1.30134	1.15669	1.02811
GRMZM2G175272_P01	1.28343	1.30134	1.13288	1
GRMZM2G063806_P01	1.29235	1.30134	1.1487	1.03526
GRMZM2G176612_P02	1.29235	1.30134	1.11729	1.08673
GRMZM2G147726_P01	1.08673	1.31039	1.07177	1.07923
GRMZM5G850904_P01	1.09429	1.31039	1.10191	1.04972
GRMZM2G060842_P01	1.1487	1.31039	1.1487	0.913831
GRMZM2G107082_P01	1.17283	1.31039	1.1487	1.06437
GRMZM2G172932_P03	1.17283	1.31039	1.18099	0.97942
GRMZM2G459291_P01	1.17283	1.31039	1.07923	0.926588
GRMZM5G802566_P06	1.21419	1.31039	1.1487	0.933033
GRMZM2G064640_P01	1.22264	1.31039	1.10957	0.835088
GRMZM2G011491_P01	1.23114	1.31039	1.06437	0.959264
GRMZM2G354053_P01	1.23114	1.31039	1.18099	1.02811
GRMZM2G553687_P01	1.24833	1.31039	1.13288	1.00696
GRMZM2G403797_P01	1.26576	1.31039	1.15669	0.972655
GRMZM2G035557_P01	1.27456	1.31039	1.00696	0.888843
GRMZM2G087326_P01	1.28343	1.31039	1.06437	0.97942
GRMZM2G150030_P01	1.28343	1.31039	1.14076	1
GRMZM2G013798_P01	1.08673	1.31951	1.07177	0.80107
GRMZM2G060886_P02	1.18921	1.31951	0.907519	1.07923
GRMZM2G032266_P01	1.19748	1.31951	1.09429	0.888843
GRMZM2G442057_P01	1.19748	1.31951	1.08673	1.02101
GRMZM2G018241_P01	1.21419	1.31951	1.05702	0.952638
GRMZM2G110145_P01	1.22264	1.31951	1.07923	1.00696
GRMZM2G163325_P01	1.23971	1.31951	1.22264	1.04247
GRMZM2G012031_P01	1.24833	1.31951	1.18921	1.07177
GRMZM5G800853_P01	1.24833	1.31951	1	0.993092
GRMZM2G028883_P01	1.10191	1.32869	1.04247	1
GRMZM2G108123_P01	1.13288	1.32869	0.823591	1.13288
GRMZM2G415491_P01	1.15669	1.32869	1.08673	1.04247
GRMZM2G163227_P01	1.20581	1.32869	1.10191	0.97942
GRMZM2G053652_P02	1.22264	1.32869	1.13288	0.959264
GRMZM2G101004_P01	1.23114	1.32869	1.07177	0.864537
GRMZM2G100146_P01	1.23971	1.32869	1.07923	1.10957
GRMZM2G027862_P01	1.23971	1.32869	1.15669	1
GRMZM2G063909_P03	1.23971	1.32869	1.13288	0.965936
GRMZM2G013461_P01	1.24833	1.32869	1.02811	0.806642
GRMZM2G148200_P01	1.24833	1.32869	1.18921	1.01396
GRMZM2G127756_P01	1.26576	1.32869	1.13288	0.97942
GRMZM2G005886_P01	1.27456	1.32869	1.15669	0.952638
GRMZM2G061096_P01	1.28343	1.32869	1.07177	1.07177
GRMZM2G148769_P02	1.28343	1.32869	1.10191	0.913831
GRMZM5G811749_P01	1.12506	1.33793	1.00696	0.870551
GRMZM2G054765_P01	1.14076	1.33793	1	1.08673
GRMZM2G029396_P01	1.18921	1.33793	1.03526	0.952638
GRMZM2G124732_P01	1.22264	1.33793	1.13288	1.04972
GRMZM2G062210_P01	1.24833	1.33793	1.09429	0.926588
GRMZM2G064993_P01	1.24833	1.33793	1.13288	0.90125
GRMZM2G071745_P02	1.24833	1.33793	1.23114	0.946058
GRMZM2G439457_P02	1.24833	1.33793	1.10191	0.952638
GRMZM2G061912_P01	1.25701	1.33793	1.14076	0.97942
GRMZM2G095534_P04	1.27456	1.33793	1.18099	1.04247
GRMZM2G146475_P01	1.07923	1.34723	1.05702	0.840896
GRMZM5G844628_P01	1.10191	1.34723	1.20581	0.926588
GRMZM2G101900_P02	1.17283	1.34723	1.13288	0.97942
GRMZM2G051403_P01	1.19748	1.34723	1.08673	0.864537
GRMZM2G116053_P01	1.20581	1.34723	1.18099	1.05702
GRMZM2G027021_P01	1.23114	1.34723	1.16473	0.993092
GRMZM2G061950_P01	1.23971	1.34723	1.07177	0.913831
GRMZM2G134256_P01	1.23971	1.34723	1.14076	0.888843
GRMZM2G139550_P02	1.24833	1.34723	1.11729	0.946058
GRMZM6G741620_P02	1.24833	1.34723	1.14076	1
GRMZM2G151414_P02	1.25701	1.34723	1.10191	0.952638
GRMZM2G029933_P01	1.28343	1.34723	1.17283	1.04247
GRMZM2G089365_P01	1.07177	1.3566	1.13288	1.07923
GRMZM2G112535_P01	1.15669	1.3566	1.18921	0.907519
GRMZM2G464328_P01	1.18099	1.3566	1.07177	0.840896
GRMZM2G124239_P01	1.19748	1.3566	1.10957	1
GRMZM2G027728_P01	1.22264	1.3566	1.06437	1.03526
GRMZM2G156673_P01	1.23971	1.3566	1.15669	0.876606
GRMZM2G168330_P02	1.23971	1.3566	1.18099	1.02811
GRMZM2G072080_P01	1.24833	1.3566	1.04972	1.02101
GRMZM2G146951_P01	1.24833	1.3566	1.1487	1.06437
GRMZM2G428168_P01	1.24833	1.3566	1.13288	0.97942
GRMZM2G325019_P01	1.26576	1.3566	1.09429	1.02101
GRMZM2G060870_P02	1.27456	1.3566	1.07923	0.993092
GRMZM2G086636_P01	1.28343	1.3566	1.07923	0.90125
GRMZM2G003384_P01	1.23114	1.36604	1.13288	0.993092
AC194341.4_FGP002	1.25701	1.36604	1.07923	0.876606
GRMZM2G084942_P02	1.25701	1.36604	1.12506	0.986233
GRMZM2G060160_P01	1.28343	1.36604	1.21419	0.97942
GRMZM2G006229_P02	1.29235	1.36604	1.07923	1.14076
GRMZM2G024310_P01	1.29235	1.36604	1.12506	0.846745
GRMZM2G142097_P02	1.11729	1.37554	1.09429	0.882703
GRMZM2G132093_P01	1.17283	1.37554	1.10191	0.913831
GRMZM2G107588_P01	1.21419	1.37554	1.05702	0.907519
GRMZM2G445905_P03	1.21419	1.37554	1.10957	1
GRMZM2G027451_P04	1.22264	1.37554	1.17283	0.926588
GRMZM2G079777_P01	1.23114	1.37554	1.10957	0.876606
GRMZM2G171060_P02	1.24833	1.37554	1.09429	0.823591
GRMZM5G837058_P01	1.24833	1.37554	1.11729	1.00696
GRMZM2G044684_P01	1.28343	1.37554	1.13288	0.840896
GRMZM2G027723_P01	1.29235	1.37554	1.18099	0.946058
GRMZM2G063511_P01	1.22264	1.38511	1.04972	1.04247
GRMZM2G115901_P01	1.24833	1.38511	1.18921	1.00696
GRMZM2G144155_P01	1.29235	1.38511	1.12506	1.02101
GRMZM2G023748_P01	1.16473	1.39474	1.08673	0.97942
GRMZM2G078985_P01	1.23114	1.39474	1.10957	0.933033
GRMZM2G025409_P01	1.25701	1.39474	1.04247	1.03526
GRMZM2G039419_P01	1.27456	1.39474	1.12506	0.993092
GRMZM2G074267_P01	1.29235	1.39474	1.22264	1.17283
GRMZM2G380457_P01	0.959264	1.40444	1.10957	0.959264
GRMZM2G111713_P01	1.09429	1.40444	1.10957	0.933033
GRMZM2G143791_P01	1.19748	1.40444	1.22264	1.07177
GRMZM2G009136_P01	1.23114	1.40444	1.10191	0.926588
GRMZM2G075333_P01	1.24833	1.40444	1.04247	1.01396
GRMZM2G035820_P01	1.27456	1.40444	1.11729	0.959264
GRMZM2G114888_P02	1.29235	1.40444	1.25701	0.972655
GRMZM2G038536_P01	0.952638	1.41421	1.15669	1.09429
AC209257.4_FGP008	1.02101	1.41421	1.04972	0.959264
GRMZM2G089421_P01	1.14076	1.41421	1.10957	1.13288
GRMZM2G108348_P03	1.23114	1.41421	1.07923	0.823591
GRMZM2G122805_P01	1.28343	1.41421	1.16473	1.06437
GRMZM2G179703_P02	1.25701	1.42405	1.08673	1.07923
GRMZM2G143883_P06	1.26576	1.42405	1.05702	1
GRMZM2G024647_P01	1.14076	1.43396	1.11729	0.959264
GRMZM2G024811_P01	1.20581	1.43396	1	1.09429
GRMZM2G394528_P02	1.23971	1.43396	1.08673	0.97942
GRMZM2G125149_P01	1.27456	1.43396	1.10191	0.959264
GRMZM2G056252_P01	1.07177	1.44393	1.06437	0.926588
GRMZM2G073498_P01	1.23114	1.44393	1.08673	1.03526
GRMZM2G314679_P04	1.29235	1.44393	1.07177	0.882703
GRMZM2G330772_P02	1.32869	1.44393	1.29235	0.870551
GRMZM2G164821_P01	1.26576	1.45397	1.11729	1.08673
GRMZM2G043127_P01	1.20581	1.46409	1.18921	0.993092
GRMZM2G090422_P01	1.21419	1.46409	1.09429	0.852635
GRMZM2G377797_P01	1.21419	1.46409	1.18099	0.933033
GRMZM2G422750_P03	1.24833	1.46409	1.25701	0.97942
GRMZM2G068471_P01	1.26576	1.46409	1.01396	1.02101
GRMZM2G114706_P01	1.28343	1.46409	1.04972	1.04247
GRMZM2G104983_P01	1.23114	1.47427	1.03526	1.06437
GRMZM2G164974_P01	1.22264	1.49485	1.07177	0.959264
GRMZM2G135654_P01	1.15669	1.50525	1.18099	0.939523
GRMZM2G043279_P01	1.17283	1.50525	1.08673	0.888843
GRMZM5G803556_P01	1.22264	1.52626	1.18921	1.03526
GRMZM2G156068_P01	1.27456	1.58008	1.09429	0.806642
GRMZM2G145213_P01	1.10957	1.59107	1.12506	0.790041
GRMZM2G039639_P01	1.04247	1.75321	0.806642	1.03526
GRMZM2G309970_P01	1.10957	0.598739	1.27456	0.965936
GRMZM2G161560_P01	0.707107	0.602904	1.01396	0.946058
GRMZM2G166692_P01	0.795536	0.650671	0.858565	0.852635
GRMZM2G131577_P03	0.888843	0.673617	0.972655	0.952638
GRMZM2G037043_P01	0.668964	0.692555	0.852635	0.920188
GRMZM2G071659_P01	0.870551	0.721965	0.852635	0.926588
GRMZM2G073788_P02	0.959264	0.726986	1.06437	1.18921
GRMZM2G090865_P03	0.63728	0.732043	0.773782	0.846745
AC208897.3_FGP004	0.952638	0.737135	0.726986	0.920188
GRMZM2G143160_P01	0.82932	0.742262	0.888843	0.76313
GRMZM2G136700_P01	1.09429	0.742262	1.10191	1.13288
GRMZM2G099827_P01	0.76313	0.76313	0.907519	0.895025
GRMZM2G143512_P01	0.76313	0.76313	1.03526	0.80107
GRMZM2G121360_P01	0.939523	0.76313	0.840896	0.835088
GRMZM2G016677_P01	0.812252	0.773782	0.888843	0.993092
GRMZM2G017186_P11	0.817902	0.773782	1.03526	1.05702
GRMZM2G025322_P01	0.82932	0.773782	0.952638	1
GRMZM2G035708_P07	0.846745	0.773782	0.907519	1.00696
GRMZM2G073465_P03	0.846745	0.773782	0.888843	1.02101
GRMZM2G123558_P02	1.00696	0.773782	1.06437	0.882703
GRMZM2G087032_P01	0.773782	0.779165	0.846745	1.07177
GRMZM2G121878_P01	0.773782	0.779165	0.895025	0.986233
GRMZM5G815553_P01	0.806642	0.779165	0.926588	0.986233
GRMZM2G019695_P01	0.888843	0.779165	0.895025	1.02811
GRMZM2G088469_P01	0.895025	0.779165	0.812252	1.04247
GRMZM2G152925_P01	1.13288	0.779165	1.28343	0.959264
GRMZM2G025992_P01	1.14076	0.779165	0.895025	0.97942
GRMZM2G160064_P01	1.20581	0.779165	0.939523	0.97942
GRMZM2G028393_P02	1.21419	0.779165	1.13288	0.986233
GRMZM2G145827_P02	0.768438	0.784584	1.36604	0.926588
GRMZM2G346455_P06	0.784584	0.784584	0.876606	1.01396
GRMZM2G097457_P01	0.790041	0.784584	0.858565	0.986233
GRMZM2G410766_P01	0.80107	0.784584	0.858565	0.97942
GRMZM2G101617_P01	0.870551	0.784584	0.907519	1.05702
GRMZM2G099547_P01	0.972655	0.784584	1.04972	0.959264
GRMZM2G028640_P01	1.00696	0.784584	1.10957	0.959264
GRMZM2G134738_P01	1.04972	0.784584	1.02101	0.90125
GRMZM2G312069_P01	1.14076	0.784584	0.986233	1.15669
GRMZM2G110004_P01	1.36604	0.784584	0.946058	0.895025
GRMZM2G427369_P01	0.784584	0.790041	0.840896	0.939523
GRMZM2G107562_P01	0.795536	0.790041	0.840896	0.952638
GRMZM2G018375_P02	0.817902	0.790041	0.90125	1.02811
GRMZM2G105791_P01	0.835088	0.790041	0.913831	0.993092
GRMZM2G076597_P02	0.870551	0.790041	0.97942	0.972655
GRMZM2G025954_P01	0.876606	0.790041	0.959264	0.965936
GRMZM2G030240_P01	0.876606	0.790041	0.913831	1
GRMZM2G017229_P01	0.920188	0.790041	0.946058	0.933033
AC217665.3_FGP005	0.965936	0.790041	0.933033	1.02811
GRMZM2G047204_P01	0.986233	0.790041	0.939523	1.02101
GRMZM2G111954_P03	0.986233	0.790041	1.04247	1.02811
GRMZM2G444623_P02	1.04247	0.790041	1.01396	1.02811
AC220927.3_FGP007	0.790041	0.795536	0.907519	0.952638
GRMZM2G107491_P02	0.82932	0.795536	0.835088	0.965936
GRMZM2G047954_P01	0.835088	0.795536	0.926588	0.993092
GRMZM2G044498_P01	0.846745	0.795536	0.876606	0.965936
GRMZM2G006130_P03	0.852635	0.795536	0.907519	0.986233
GRMZM2G024150_P01	0.858565	0.795536	0.907519	0.913831
GRMZM2G382569_P01	0.864537	0.795536	0.823591	0.920188
GRMZM2G157156_P02	0.870551	0.795536	0.926588	1.01396
GRMZM2G164378_P01	0.888843	0.795536	0.90125	0.80107
GRMZM2G095280_P01	0.90125	0.795536	1.07923	1.13288
GRMZM2G018579_P01	0.920188	0.795536	0.965936	1.03526
GRMZM2G373522_P01	1.08673	0.795536	1.00696	0.965936
GRMZM2G441656_P01	1.10957	0.795536	1.00696	1.27456
GRMZM2G137985_P01	0.806642	0.80107	0.817902	0.946058
GRMZM2G125977_P01	0.846745	0.80107	1.04972	0.920188
GRMZM2G312910_P02	0.846745	0.80107	0.913831	1
GRMZM2G074040_P01	0.852635	0.80107	0.870551	0.972655
GRMZM2G107388_P01	0.870551	0.80107	0.986233	0.993092
GRMZM2G125044_P01	0.920188	0.80107	0.858565	1.01396
GRMZM2G023528_P03	0.939523	0.80107	0.876606	1.01396
GRMZM5G859388_P01	0.946058	0.80107	1.26576	0.97942
GRMZM2G085670_P04	1.00696	0.80107	1.01396	0.90125
GRMZM2G071270_P01	1.02101	0.80107	0.812252	1.04972
GRMZM5G889520_P01	1.05702	0.80107	1.05702	0.858565
GRMZM2G382171_P01	1.07923	0.80107	1.04972	1.10957
GRMZM5G836250_P03	0.773782	0.806642	0.840896	0.952638
GRMZM2G117968_P01	0.806642	0.806642	0.876606	1.02811
GRMZM5G843748_P02	0.817902	0.806642	0.790041	1.06437
GRMZM2G061932_P01	0.846745	0.806642	0.888843	0.993092
GRMZM2G068963_P01	0.846745	0.806642	0.920188	1.01396
GRMZM2G082823_P01	0.933033	0.806642	0.97942	1.03526
GRMZM2G080912_P01	0.946058	0.806642	0.952638	0.986233
GRMZM5G840002_P02	0.959264	0.806642	0.97942	1.06437
GRMZM2G128935_P01	0.965936	0.806642	0.952638	0.986233
GRMZM2G148867_P01	0.972655	0.806642	0.939523	0.933033
GRMZM2G012276_P02	1.00696	0.806642	1.06437	0.888843
GRMZM2G451224_P01	1.02101	0.806642	1.03526	0.80107
GRMZM2G150363_P01	0.795536	0.812252	0.952638	0.907519
GRMZM2G172723_P01	0.795536	0.812252	0.90125	0.959264
GRMZM2G074097_P01	0.823591	0.812252	0.858565	1.02101
GRMZM2G038636_P01	0.870551	0.812252	0.852635	0.972655
GRMZM2G024976_P01	0.882703	0.812252	0.870551	0.986233
GRMZM2G014170_P01	0.888843	0.812252	1.01396	1.04972
GRMZM2G072744_P01	0.895025	0.812252	0.858565	0.939523
GRMZM2G110294_P01	0.913831	0.812252	0.97942	0.993092
GRMZM2G057374_P01	0.920188	0.812252	0.907519	0.939523
GRMZM2G504401_P01	0.933033	0.812252	0.907519	1.05702
GRMZM2G328171_P01	0.946058	0.812252	0.895025	1.04247
GRMZM2G128072_P01	0.952638	0.812252	1.02101	0.895025
GRMZM2G140352_P04	1.06437	0.812252	1.02811	0.97942
GRMZM2G177828_P01	1.19748	0.812252	1.23114	0.972655
GRMZM2G001956_P01	0.773782	0.817902	0.806642	0.993092
GRMZM2G448174_P01	0.790041	0.817902	0.895025	0.97942
GRMZM2G111216_P01	0.795536	0.817902	0.895025	1.00696
GRMZM5G890665_P02	0.806642	0.817902	0.913831	0.959264
GRMZM2G345493_P02	0.835088	0.817902	0.870551	0.946058
GRMZM2G133844_P01	0.852635	0.817902	0.90125	0.939523
GRMZM2G074107_P02	0.907519	0.817902	0.952638	1.07177
GRMZM2G135498_P01	0.913831	0.817902	0.986233	1
GRMZM2G134067_P01	0.972655	0.817902	0.952638	0.907519
GRMZM2G172230_P01	1.02101	0.817902	0.82932	1
GRMZM2G053206_P01	1.03526	0.817902	0.972655	1.08673
GRMZM2G012566_P02	1.08673	0.817902	1.13288	0.972655
GRMZM2G019358_P01	0.790041	0.823591	0.840896	0.965936
GRMZM2G475017_P01	0.840896	0.823591	0.97942	1.26576
GRMZM2G012119_P01	0.840896	0.823591	0.933033	1.07177
GRMZM2G003096_P01	0.846745	0.823591	0.952638	1.00696
GRMZM2G151738_P01	0.864537	0.823591	0.965936	1.06437
GRMZM2G015285_P01	0.913831	0.823591	0.920188	1
GRMZM2G400604_P01	0.926588	0.823591	0.913831	1.08673
GRMZM2G157470_P01	0.933033	0.823591	0.939523	1.00696
GRMZM2G087570_P01	0.952638	0.823591	0.959264	1.02101
GRMZM2G381129_P01	0.959264	0.823591	0.882703	0.986233
GRMZM2G038365_P01	0.97942	0.823591	0.965936	0.888843
GRMZM2G142802_P01	0.993092	0.823591	0.90125	1.05702
GRMZM2G013060_P01	1.14076	0.823591	1	0.952638
GRMZM2G143788_P01	1.18099	0.823591	1.10191	0.846745
GRMZM6G741210_P01	0.790041	0.82932	0.864537	1.02811
GRMZM2G081268_P01	0.795536	0.82932	0.846745	0.952638
GRMZM2G104397_P02	0.80107	0.82932	0.907519	0.993092
GRMZM2G306345_P01	0.80107	0.82932	0.870551	0.959264
GRMZM2G321053_P01	0.806642	0.82932	0.946058	1.03526
GRMZM2G001696_P01	0.817902	0.82932	0.907519	0.97942
GRMZM2G097775_P01	0.852635	0.82932	0.952638	1.13288
GRMZM2G471357_P01	0.858565	0.82932	0.907519	1.08673
GRMZM2G118646_P01	0.864537	0.82932	0.895025	1.02811
GRMZM2G348873_P01	0.864537	0.82932	0.952638	1.03526
GRMZM2G049547_P03	0.870551	0.82932	0.882703	0.97942
GRMZM2G070603_P01	0.870551	0.82932	0.920188	1.03526
GRMZM2G012397_P01	0.876606	0.82932	0.933033	0.97942
GRMZM2G030809_P02	0.876606	0.82932	1.02101	1.14076
GRMZM2G053925_P01	0.913831	0.82932	0.952638	0.939523
GRMZM5G893392_P01	0.926588	0.82932	0.946058	0.933033
GRMZM2G085885_P03	0.946058	0.82932	0.920188	0.965936
GRMZM2G104394_P01	0.946058	0.82932	0.993092	1
GRMZM2G074252_P01	0.952638	0.82932	0.939523	1
GRMZM2G150838_P01	0.97942	0.82932	1.00696	1.03526
GRMZM2G116902_P01	1	0.82932	1	1.01396
GRMZM2G075690_P01	1.02811	0.82932	0.965936	0.97942
GRMZM5G808939_P01	0.784584	0.835088	0.882703	0.97942
GRMZM2G069708_P01	0.790041	0.835088	0.858565	0.986233
GRMZM2G178960_P01	0.812252	0.835088	0.888843	0.986233
GRMZM2G150893_P01	0.823591	0.835088	0.913831	1.07177
GRMZM2G331720_P01	0.823591	0.835088	0.835088	0.986233
GRMZM2G022279_P02	0.835088	0.835088	0.959264	0.952638
AC198353.5_FGP001	0.882703	0.835088	0.779165	0.972655
GRMZM2G441888_P01	0.882703	0.835088	0.90125	1.02101
GRMZM2G025528_P01	0.888843	0.835088	0.933033	0.952638
GRMZM2G035213_P01	0.895025	0.835088	0.895025	0.926588
GRMZM2G074546_P01	0.895025	0.835088	1	0.870551
GRMZM2G098298_P01	0.895025	0.835088	0.835088	0.913831
GRMZM2G119930_P01	0.895025	0.835088	0.946058	0.933033
GRMZM2G122793_P01	0.907519	0.835088	0.926588	0.933033
GRMZM2G161459_P02	0.913831	0.835088	0.895025	1.06437
GRMZM5G876616_P01	0.913831	0.835088	0.858565	1.06437
GRMZM2G045706_P01	0.939523	0.835088	0.926588	1.03526
GRMZM2G006791_P01	0.952638	0.835088	0.959264	0.870551
GRMZM2G462140_P01	0.952638	0.835088	0.939523	1.00696
GRMZM2G090271_P01	0.965936	0.835088	0.939523	0.946058
GRMZM2G063244_P01	1.03526	0.835088	1.10191	0.965936
GRMZM2G175273_P01	1.03526	0.835088	0.946058	0.965936
GRMZM2G007928_P01	1.07177	0.835088	1.25701	0.926588
GRMZM2G107557_P03	1.09429	0.835088	1.02811	0.926588
GRMZM2G380432_P01	1.16473	0.835088	1.04972	1.12506
GRMZM2G003318_P01	0.773782	0.840896	0.870551	0.993092
GRMZM2G448142_P01	0.784584	0.840896	0.90125	1.02101
GRMZM2G004880_P01	0.80107	0.840896	0.907519	1.00696
GRMZM2G034243_P01	0.80107	0.840896	0.913831	1
GRMZM2G028521_P02	0.806642	0.840896	0.907519	0.82932
GRMZM2G339699_P01	0.812252	0.840896	0.895025	1.02811
GRMZM2G095082_P01	0.823591	0.840896	0.920188	0.986233
GRMZM2G443985_P02	0.835088	0.840896	0.939523	1.04972
GRMZM2G315401_P01	0.846745	0.840896	1	0.993092
GRMZM2G039841_P01	0.852635	0.840896	0.920188	0.97942
GRMZM2G137077_P01	0.870551	0.840896	0.965936	1.07177
GRMZM2G162786_P01	0.876606	0.840896	0.952638	0.864537
GRMZM2G162200_P01	0.882703	0.840896	0.913831	1.02811
GRMZM2G071087_P01	0.888843	0.840896	0.97942	1.05702
GRMZM2G148864_P01	0.913831	0.840896	0.933033	0.993092
GRMZM2G700188_P04	0.920188	0.840896	0.888843	1.03526
GRMZM2G393673_P02	0.926588	0.840896	0.721965	0.965936
GRMZM2G094742_P03	0.933033	0.840896	0.882703	1.02811
GRMZM2G095333_P01	0.959264	0.840896	1.00696	1.04972
GRMZM2G426229_P01	0.959264	0.840896	0.986233	1.15669
GRMZM5G898915_P01	0.965936	0.840896	0.946058	1.03526
GRMZM2G123499_P01	1	0.840896	0.972655	1.08673
GRMZM2G169182_P02	1	0.840896	0.907519	1.10191
GRMZM2G465333_P01	1	0.840896	1.02101	1.02101
GRMZM2G053458_P01	1.00696	0.840896	1.10191	1.00696
GRMZM2G377311_P01	1.00696	0.840896	1.10191	1.07177
AC189750.4_FGP004	1.02101	0.840896	1	0.858565
GRMZM2G155242_P01	1.06437	0.840896	0.959264	0.926588
GRMZM2G101791_P01	1.07923	0.840896	0.907519	1.00696
GRMZM2G149556_P02	1.1487	0.840896	1.17283	1
GRMZM5G885392_P01	0.784584	0.846745	0.895025	0.952638
GRMZM2G014558_P01	0.795536	0.846745	0.852635	0.920188
GRMZM2G037644_P01	0.80107	0.846745	0.926588	1
GRMZM2G568636_P01	0.80107	0.846745	0.986233	0.972655
GRMZM2G130085_P03	0.846745	0.846745	0.888843	1.02811
GRMZM2G004377_P02	0.870551	0.846745	0.972655	1.04247
GRMZM2G090568_P01	0.870551	0.846745	0.823591	0.986233
GRMZM2G177895_P01	0.870551	0.846745	0.920188	0.97942
GRMZM2G097821_P01	0.888843	0.846745	1.10957	1.1487
GRMZM2G010490_P04	0.895025	0.846745	0.939523	0.97942
GRMZM2G173669_P01	0.895025	0.846745	0.90125	0.933033
GRMZM2G335657_P01	0.895025	0.846745	0.920188	1
GRMZM2G057535_P01	0.913831	0.846745	0.876606	1.03526
GRMZM2G180889_P01	0.913831	0.846745	0.939523	1.11729
GRMZM2G089308_P01	0.920188	0.846745	0.986233	1.05702
GRMZM5G805134_P02	0.926588	0.846745	0.895025	0.97942
GRMZM2G439589_P01	0.933033	0.846745	0.895025	1.02101
GRMZM2G120652_P01	0.939523	0.846745	0.913831	1.02811
GRMZM2G169405_P01	0.939523	0.846745	0.920188	0.870551
GRMZM2G022365_P01	0.946058	0.846745	0.965936	1
GRMZM2G476933_P01	0.946058	0.846745	1.00696	1.02101
GRMZM2G162282_P01	0.959264	0.846745	0.97942	0.986233
GRMZM2G066373_P01	0.972655	0.846745	0.986233	0.972655
GRMZM2G054115_P03	1	0.846745	1	1.00696
GRMZM2G128454_P01	1.04972	0.846745	1.04972	0.823591
GRMZM2G171628_P01	1.09429	0.846745	1	1.01396
GRMZM5G800096_P01	0.768438	0.852635	0.90125	0.972655
GRMZM2G474534_P02	0.812252	0.852635	0.852635	1.07923
GRMZM2G088601_P03	0.817902	0.852635	0.80107	0.97942
GRMZM2G122715_P02	0.846745	0.852635	0.907519	1.03526
GRMZM2G538535_P01	0.858565	0.852635	0.926588	0.993092
GRMZM2G170812_P01	0.864537	0.852635	0.895025	1.02101
GRMZM2G077711_P01	0.870551	0.852635	0.913831	0.907519
AC235543.1_FGP003	0.876606	0.852635	0.888843	1.06437
GRMZM2G047968_P03	0.876606	0.852635	0.907519	1.02811
GRMZM2G100794_P01	0.888843	0.852635	0.952638	1.01396
GRMZM2G007651_P01	0.895025	0.852635	0.926588	1.00696
GRMZM2G450233_P01	0.895025	0.852635	0.840896	1.04247
GRMZM2G011373_P01	0.926588	0.852635	0.946058	1.02101
GRMZM2G122431_P01	0.926588	0.852635	0.907519	1.02101
GRMZM2G055025_P01	0.933033	0.852635	0.933033	1.00696
GRMZM2G150616_P01	0.946058	0.852635	0.913831	0.986233
GRMZM2G422205_P01	0.952638	0.852635	1.12506	1.04247
GRMZM2G026654_P04	0.952638	0.852635	1.07177	1.07923
AC188838.3_FGP005	0.97942	0.852635	0.926588	0.965936
GRMZM2G012932_P01	0.986233	0.852635	0.986233	0.993092
GRMZM2G166281_P01	0.986233	0.852635	0.97942	1.08673
GRMZM2G044398_P04	0.993092	0.852635	1.05702	1.02811
GRMZM2G381576_P02	1.06437	0.852635	0.82932	1.10191
GRMZM2G028758_P01	1.09429	0.852635	0.97942	0.888843
GRMZM2G070343_P01	1.09429	0.852635	1.02811	0.90125
GRMZM2G139296_P01	1.09429	0.852635	1.04972	1.01396
GRMZM2G074028_P01	1.10191	0.852635	1.1487	1.02811
GRMZM5G831399_P01	0.779165	0.858565	1.07177	0.846745
GRMZM2G136508_P01	0.795536	0.858565	0.817902	1.28343
GRMZM2G077809_P02	0.806642	0.858565	0.939523	0.952638
GRMZM2G036609_P01	0.817902	0.858565	0.895025	1.00696
GRMZM2G033208_P02	0.823591	0.858565	0.907519	1.00696
GRMZM2G051697_P01	0.823591	0.858565	0.876606	0.965936
GRMZM2G147687_P03	0.823591	0.858565	0.882703	1.02811
GRMZM2G096391_P01	0.82932	0.858565	0.870551	0.965936
GRMZM2G085301_P01	0.835088	0.858565	0.907519	0.972655
GRMZM2G497531_P03	0.846745	0.858565	0.90125	0.933033
AC155624.2_FGP011	0.852635	0.858565	0.852635	0.965936
GRMZM2G165655_P01	0.852635	0.858565	0.876606	1
GRMZM2G052666_P01	0.858565	0.858565	0.895025	1.03526
GRMZM2G306345_P05	0.858565	0.858565	0.907519	0.986233
GRMZM2G031028_P02	0.864537	0.858565	0.812252	0.986233
GRMZM2G011520_P01	0.876606	0.858565	0.90125	0.97942
GRMZM5G879527_P04	0.882703	0.858565	0.946058	1.10191
GRMZM2G172369_P03	0.888843	0.858565	0.895025	1.03526
GRMZM2G442804_P03	0.895025	0.858565	0.817902	0.972655
GRMZM2G448001_P01	0.90125	0.858565	0.965936	1.07923
GRMZM2G379002_P01	0.926588	0.858565	0.952638	1.01396
GRMZM2G027478_P02	0.933033	0.858565	0.97942	0.858565
GRMZM6G435553_P01	0.933033	0.858565	0.939523	0.993092
GRMZM2G405459_P01	0.939523	0.858565	0.952638	1
GRMZM2G408706_P04	0.972655	0.858565	0.952638	1.04972
GRMZM2G450125_P01	0.986233	0.858565	0.895025	0.965936
GRMZM2G163988_P01	1.00696	0.858565	1.25701	0.90125
GRMZM2G097662_P01	1.02101	0.858565	0.926588	1.06437
GRMZM2G111143_P02	1.02811	0.858565	1.01396	1.05702
GRMZM2G152056_P01	1.04972	0.858565	1.02101	1.09429
GRMZM2G456217_P01	1.05702	0.858565	1.04972	0.97942
GRMZM2G060001_P01	1.08673	0.858565	0.972655	1.04247
GRMZM2G070239_P02	1.08673	0.858565	0.986233	1.06437
GRMZM2G128268_P01	0.773782	0.864537	0.823591	0.97942
GRMZM2G161295_P01	0.773782	0.864537	0.907519	0.959264
GRMZM2G012758_P01	0.795536	0.864537	0.926588	1.02101
GRMZM2G018441_P01	0.795536	0.864537	0.895025	1.00696
GRMZM2G391936_P02	0.795536	0.864537	0.852635	0.97942
GRMZM2G448344_P01	0.806642	0.864537	0.933033	0.986233
GRMZM2G074648_P01	0.823591	0.864537	0.90125	0.959264
GRMZM2G171871_P01	0.823591	0.864537	0.926588	0.959264
GRMZM2G073059_P01	0.835088	0.864537	0.82932	0.965936
GRMZM2G314094_P01	0.835088	0.864537	0.876606	0.959264
GRMZM5G807267_P04	0.864537	0.864537	0.870551	0.986233
GRMZM2G146514_P03	0.870551	0.864537	0.926588	1
GRMZM2G076006_P03	0.870551	0.864537	0.895025	0.920188
GRMZM2G127123_P03	0.870551	0.864537	0.946058	1.04247
GRMZM2G118241_P01	0.876606	0.864537	0.90125	0.993092
GRMZM2G388855_P01	0.876606	0.864537	0.939523	0.965936
GRMZM2G001457_P02	0.888843	0.864537	0.858565	0.907519
GRMZM2G019926_P03	0.895025	0.864537	0.926588	1.01396
GRMZM2G163709_P02	0.90125	0.864537	0.959264	1.04972
GRMZM2G153068_P01	0.907519	0.864537	1.00696	0.965936
GRMZM2G018275_P01	0.913831	0.864537	0.965936	0.993092
GRMZM2G089812_P01	0.920188	0.864537	1.04972	1.01396
GRMZM2G019363_P02	0.926588	0.864537	0.972655	1.01396
GRMZM2G017249_P01	0.933033	0.864537	0.933033	0.97942
GRMZM2G175453_P01	0.933033	0.864537	1.17283	0.817902
GRMZM2G012863_P01	0.946058	0.864537	0.952638	0.993092
GRMZM2G075676_P03	0.946058	0.864537	0.972655	0.993092
GRMZM2G003642_P01	0.959264	0.864537	0.876606	0.993092
GRMZM5G839812_P01	0.965936	0.864537	0.913831	1.15669
GRMZM2G010960_P01	0.972655	0.864537	0.972655	1.04247
GRMZM2G121293_P01	0.972655	0.864537	1.03526	1.07923
GRMZM2G156227_P01	0.97942	0.864537	0.97942	0.895025
GRMZM2G156099_P02	0.993092	0.864537	0.965936	1
GRMZM5G853513_P01	1.01396	0.864537	0.913831	0.907519
GRMZM2G314661_P01	1.04247	0.864537	0.920188	1.05702
GRMZM2G051208_P01	1.07923	0.864537	1.05702	1.01396
GRMZM2G052336_P02	1.12506	0.864537	1.10957	1.10957
GRMZM2G379780_P01	1.14076	0.864537	1.10191	1.17283
GRMZM2G058522_P05	1.1487	0.864537	1.03526	1.02811
GRMZM2G098346_P01	0.784584	0.870551	0.817902	1
GRMZM2G029001_P01	0.795536	0.870551	0.933033	0.97942
GRMZM2G059083_P01	0.795536	0.870551	0.926588	0.97942
GRMZM2G073521_P01	0.817902	0.870551	0.965936	1.00696
GRMZM2G096683_P01	0.817902	0.870551	0.90125	0.97942
GRMZM2G168143_P01	0.817902	0.870551	0.882703	0.993092
GRMZM5G817886_P02	0.817902	0.870551	0.846745	0.90125
GRMZM2G051276_P01	0.823591	0.870551	0.913831	1.04247
GRMZM2G121516_P01	0.823591	0.870551	0.882703	0.946058
GRMZM2G162529_P01	0.823591	0.870551	0.895025	0.965936
GRMZM2G007249_P01	0.852635	0.870551	0.933033	0.913831
GRMZM6G477257_P01	0.852635	0.870551	0.888843	1
GRMZM2G084783_P02	0.870551	0.870551	0.907519	0.965936
GRMZM2G111309_P01	0.882703	0.870551	0.907519	1.01396
GRMZM5G852968_P03	0.882703	0.870551	0.888843	0.986233
GRMZM2G474546_P03	0.888843	0.870551	0.946058	0.90125
GRMZM2G077233_P03	0.895025	0.870551	0.835088	1.00696
GRMZM2G167428_P01	0.907519	0.870551	0.920188	0.926588
GRMZM2G135739_P01	0.913831	0.870551	0.795536	1.01396
GRMZM2G032351_P01	0.920188	0.870551	0.939523	1.00696
GRMZM2G155753_P05	0.920188	0.870551	0.939523	1.03526
GRMZM2G008263_P02	0.926588	0.870551	1.10191	1.16473
GRMZM5G823017_P01	0.926588	0.870551	0.888843	0.972655
GRMZM2G006894_P01	0.939523	0.870551	0.870551	0.959264
GRMZM2G120300_P01	0.939523	0.870551	0.913831	1
GRMZM5G834758_P03	0.939523	0.870551	0.939523	1.04972
GRMZM2G032253_P01	0.946058	0.870551	0.920188	0.920188
GRMZM2G097726_P02	0.952638	0.870551	0.993092	0.97942
GRMZM2G146670_P01	0.952638	0.870551	0.97942	0.993092
GRMZM2G158153_P02	0.952638	0.870551	1.04247	1.02101
GRMZM2G347743_P01	0.952638	0.870551	0.946058	1.00696
GRMZM2G077844_P01	0.959264	0.870551	1.00696	0.993092
GRMZM2G176253_P01	0.959264	0.870551	0.888843	1.00696
GRMZM2G115372_P01	0.972655	0.870551	1.01396	0.993092
GRMZM2G302259_P02	0.972655	0.870551	0.959264	1.00696
GRMZM2G176820_P01	0.97942	0.870551	1	0.986233
GRMZM5G882351_P01	0.97942	0.870551	1.00696	1.06437
GRMZM2G049866_P02	0.986233	0.870551	1.00696	1.04247
GRMZM5G856881_P01	0.986233	0.870551	1.02101	1.01396
GRMZM2G315176_P01	0.993092	0.870551	0.972655	1.02101
GRMZM2G472651_P01	0.993092	0.870551	0.939523	0.97942
GRMZM2G090718_P01	1	0.870551	1.01396	0.926588
GRMZM2G308570_P03	1	0.870551	1.13288	1.03526
GRMZM2G029951_P01	1.01396	0.870551	1.03526	1.00696
GRMZM2G106622_P01	1.01396	0.870551	1	1.07177
GRMZM2G318671_P01	1.01396	0.870551	1.10191	1.00696
GRMZM2G014832_P01	1.07177	0.870551	1	0.939523
GRMZM2G163157_P01	1.07923	0.870551	1.05702	1.13288
GRMZM2G170532_P02	1.08673	0.870551	1.04247	0.870551
GRMZM2G083437_P01	1.13288	0.870551	0.870551	1.53688
GRMZM2G009936_P03	1.22264	0.870551	1.10191	1.21419
GRMZM2G106552_P01	1.43396	0.870551	0.965936	0.946058
GRMZM2G069382_P01	0.784584	0.876606	0.779165	0.993092
GRMZM2G080775_P01	0.790041	0.876606	0.946058	1
GRMZM2G104608_P02	0.795536	0.876606	0.876606	0.933033
GRMZM2G094224_P01	0.806642	0.876606	0.870551	0.965936
GRMZM2G073743_P03	0.812252	0.876606	0.864537	1
GRMZM5G800101_P01	0.812252	0.876606	0.913831	0.952638
GRMZM2G078566_P01	0.823591	0.876606	0.939523	1.02101
GRMZM2G126795_P01	0.82932	0.876606	0.965936	1.02811
AC203535.4_FGP004	0.835088	0.876606	0.952638	0.986233
GRMZM2G035503_P01	0.835088	0.876606	0.913831	1
GRMZM2G092780_P01	0.835088	0.876606	0.913831	0.952638
GRMZM2G307600_P01	0.835088	0.876606	0.882703	0.965936
GRMZM2G021846_P01	0.852635	0.876606	0.864537	0.97942
GRMZM5G848696_P02	0.864537	0.876606	0.959264	1
GRMZM2G080107_P01	0.870551	0.876606	1.02811	0.986233
GRMZM2G058261_P01	0.876606	0.876606	0.939523	1.00696
GRMZM2G008765_P01	0.882703	0.876606	1.01396	1.05702
GRMZM2G133029_P01	0.882703	0.876606	0.993092	1.11729
GRMZM2G449496_P01	0.882703	0.876606	0.972655	1.02811
AC199541.4_FGP001	0.888843	0.876606	0.90125	1.00696
GRMZM5G862488_P03	0.888843	0.876606	0.90125	0.986233
GRMZM2G077015_P01	0.895025	0.876606	0.920188	1.03526
GRMZM2G177923_P01	0.895025	0.876606	0.920188	1.01396
GRMZM2G334181_P01	0.895025	0.876606	0.80107	1.06437
GRMZM2G038301_P01	0.90125	0.876606	0.97942	0.959264
GRMZM2G132811_P01	0.90125	0.876606	0.926588	1.03526
GRMZM2G006377_P01	0.920188	0.876606	0.986233	1.01396
GRMZM2G039930_P02	0.926588	0.876606	0.993092	0.97942
GRMZM2G134770_P03	0.926588	0.876606	1	1.06437
GRMZM2G402092_P01	0.926588	0.876606	0.882703	0.90125
GRMZM2G180471_P01	0.939523	0.876606	0.858565	1.04247
GRMZM2G384528_P01	0.946058	0.876606	1	1.10957
GRMZM2G158062_P02	0.952638	0.876606	0.926588	1.05702
GRMZM2G115491_P01	0.959264	0.876606	0.939523	1.04247
GRMZM2G145242_P02	0.959264	0.876606	0.959264	1.02811
GRMZM2G022645_P01	0.965936	0.876606	0.972655	1.02101
GRMZM2G053916_P01	0.965936	0.876606	0.986233	1.08673
GRMZM5G812289_P01	0.965936	0.876606	1.03526	0.952638
GRMZM2G013201_P01	0.972655	0.876606	1.01396	1.05702
GRMZM2G016088_P01	0.972655	0.876606	0.97942	1
GRMZM2G115049_P01	0.972655	0.876606	0.959264	1.02101
GRMZM2G145449_P01	0.972655	0.876606	0.986233	1.02101
GRMZM2G466833_P01	0.972655	0.876606	0.97942	0.939523
GRMZM2G346133_P01	0.97942	0.876606	0.952638	1.01396
GRMZM2G041238_P01	0.986233	0.876606	0.946058	0.946058
GRMZM2G173718_P01	1	0.876606	0.993092	1
GRMZM2G374629_P01	1.01396	0.876606	0.920188	0.870551
GRMZM2G150295_P01	1.02101	0.876606	0.952638	0.939523
GRMZM2G035325_P01	1.02811	0.876606	1.01396	1.02811
GRMZM2G170008_P01	1.04247	0.876606	0.895025	0.959264
GRMZM2G099319_P01	1.06437	0.876606	0.846745	0.888843
GRMZM2G018586_P01	1.10191	0.876606	0.907519	0.959264
GRMZM2G003631_P01	1.21419	0.876606	1.07923	0.993092
GRMZM2G086258_P02	0.784584	0.882703	0.90125	0.952638
GRMZM2G463280_P02	0.80107	0.882703	0.870551	0.965936
GRMZM2G047028_P01	0.806642	0.882703	0.882703	0.959264
GRMZM2G016236_P01	0.823591	0.882703	0.907519	1.00696
GRMZM2G065083_P01	0.823591	0.882703	0.864537	1
GRMZM2G063533_P01	0.82932	0.882703	0.933033	0.993092
GRMZM2G150683_P03	0.835088	0.882703	0.870551	0.946058
GRMZM2G307992_P03	0.835088	0.882703	1.02811	0.972655
GRMZM2G027272_P01	0.846745	0.882703	0.888843	1.21419
GRMZM2G149265_P03	0.846745	0.882703	0.926588	0.952638
GRMZM2G025659_P01	0.852635	0.882703	0.888843	1
GRMZM2G123204_P01	0.852635	0.882703	0.870551	0.97942
GRMZM5G805350_P01	0.852635	0.882703	0.876606	1.02101
GRMZM2G058948_P01	0.858565	0.882703	0.946058	0.993092
GRMZM2G121612_P02	0.870551	0.882703	0.933033	0.986233
GRMZM2G117531_P04	0.882703	0.882703	0.946058	0.876606
GRMZM2G030529_P01	0.888843	0.882703	0.907519	0.972655
GRMZM2G397247_P03	0.888843	0.882703	0.946058	1.02811
GRMZM2G051622_P01	0.895025	0.882703	0.907519	1.02811
GRMZM5G840582_P01	0.895025	0.882703	0.90125	1.00696
GRMZM2G048129_P01	0.907519	0.882703	0.870551	1.13288
GRMZM2G145360_P01	0.907519	0.882703	0.97942	1.03526
GRMZM2G423137_P01	0.907519	0.882703	0.939523	1.02101
GRMZM2G352695_P01	0.913831	0.882703	0.90125	0.959264
GRMZM2G008425_P01	0.920188	0.882703	0.864537	1.02811
GRMZM2G133475_P01	0.920188	0.882703	0.933033	1.01396
GRMZM2G135029_P03	0.920188	0.882703	0.920188	0.993092
GRMZM2G139041_P01	0.920188	0.882703	0.952638	1.04247
GRMZM2G036921_P01	0.926588	0.882703	0.946058	1
GRMZM2G046618_P01	0.926588	0.882703	0.888843	1.04972
GRMZM2G146472_P01	0.926588	0.882703	0.959264	1.01396
GRMZM2G371313_P01	0.926588	0.882703	0.993092	0.926588
GRMZM2G102681_P01	0.933033	0.882703	0.986233	1.04247
GRMZM2G104269_P01	0.933033	0.882703	1.00696	0.959264
GRMZM2G308956_P01	0.933033	0.882703	1.06437	1.10957
GRMZM2G141241_P01	0.939523	0.882703	0.852635	0.946058
GRMZM2G080120_P01	0.946058	0.882703	1	1.00696
GRMZM2G701207_P03	0.946058	0.882703	0.926588	0.823591
GRMZM2G433333_P02	0.952638	0.882703	1.04972	1.01396
GRMZM2G088590_P01	0.959264	0.882703	0.965936	1.04247
GRMZM2G180458_P01	0.959264	0.882703	0.933033	0.952638
GRMZM2G076062_P01	0.965936	0.882703	0.913831	1.04972
GRMZM2G426415_P01	0.97942	0.882703	0.965936	0.993092
GRMZM2G157317_P01	0.993092	0.882703	0.993092	1.03526
GRMZM2G399284_P03	1.00696	0.882703	1.02811	1.07923
GRMZM2G162007_P02	1.02101	0.882703	1	1.03526
GRMZM2G360626_P01	1.02811	0.882703	0.920188	1.02811
GRMZM2G025366_P01	1.03526	0.882703	1.03526	1.10191
GRMZM2G455687_P01	1.03526	0.882703	1.01396	0.993092
GRMZM2G087600_P01	1.04247	0.882703	0.993092	1.10957
GRMZM2G149150_P01	1.07177	0.882703	1.07177	1.08673
GRMZM2G086869_P03	1.09429	0.882703	0.933033	1.07923
GRMZM2G064753_P01	1.14076	0.882703	1.11729	0.965936
GRMZM2G061135_P01	1.18921	0.882703	1.08673	1.00696
GRMZM2G075562_P01	0.773782	0.888843	0.986233	1.07177
GRMZM2G320206_P01	0.784584	0.888843	1.03526	1.04247
GRMZM2G025854_P04	0.812252	0.888843	0.913831	1
GRMZM2G157269_P01	0.812252	0.888843	0.907519	0.986233
GRMZM2G074546_P02	0.823591	0.888843	0.939523	0.965936
GRMZM2G328908_P01	0.823591	0.888843	0.926588	0.986233
GRMZM2G075958_P01	0.835088	0.888843	0.907519	1.00696
GRMZM2G094165_P01	0.835088	0.888843	0.90125	1
GRMZM2G181258_P01	0.835088	0.888843	0.876606	0.939523
GRMZM2G346263_P03	0.840896	0.888843	0.907519	0.97942
GRMZM2G073054_P02	0.852635	0.888843	0.926588	0.993092
GRMZM2G085019_P01	0.852635	0.888843	0.888843	0.939523
GRMZM2G112968_P02	0.852635	0.888843	1.01396	1.02811
GRMZM2G132607_P01	0.852635	0.888843	0.913831	1.02101
GRMZM5G809546_P01	0.852635	0.888843	0.913831	0.965936
GRMZM2G023105_P01	0.858565	0.888843	1.01396	1.08673
GRMZM2G093666_P01	0.858565	0.888843	0.835088	1
GRMZM2G348512_P06	0.858565	0.888843	0.913831	0.959264
GRMZM2G383088_P01	0.858565	0.888843	0.913831	0.939523
GRMZM2G025123_P01	0.864537	0.888843	0.965936	0.993092
GRMZM2G098290_P02	0.864537	0.888843	0.913831	1.02101
GRMZM2G139193_P01	0.864537	0.888843	1.01396	1.11729
GRMZM2G053554_P01	0.882703	0.888843	0.952638	1.03526
GRMZM2G065066_P01	0.882703	0.888843	0.920188	1.02101
GRMZM2G082792_P01	0.888843	0.888843	1	1.07923
GRMZM2G126361_P02	0.888843	0.888843	0.939523	0.972655
GRMZM2G106792_P01	0.90125	0.888843	0.952638	0.972655
GRMZM2G111164_P04	0.90125	0.888843	0.870551	1
GRMZM2G006121_P01	0.907519	0.888843	0.972655	1
GRMZM2G044460_P01	0.907519	0.888843	0.97942	1.06437
GRMZM2G132796_P01	0.907519	0.888843	0.965936	1.08673
GRMZM2G047319_P01	0.913831	0.888843	1	1.06437
GRMZM2G131176_P01	0.913831	0.888843	1.04247	1.04247
GRMZM5G858471_P01	0.913831	0.888843	1.00696	0.972655
GRMZM2G048324_P01	0.920188	0.888843	0.907519	0.986233
GRMZM2G097190_P01	0.920188	0.888843	0.913831	1.02811
GRMZM2G424857_P01	0.920188	0.888843	0.864537	0.986233
GRMZM2G420910_P01	0.926588	0.888843	1	0.993092
GRMZM6G175135_P02	0.926588	0.888843	0.913831	1
GRMZM2G052658_P01	0.933033	0.888843	0.870551	1.00696
GRMZM2G114739_P01	0.933033	0.888843	0.946058	1.02101
AC234158.1_FGP005	0.939523	0.888843	1.19748	0.858565
GRMZM2G058498_P01	0.939523	0.888843	0.965936	1.03526
GRMZM2G090824_P01	0.939523	0.888843	0.986233	1
GRMZM2G098397_P01	0.939523	0.888843	0.939523	1.04972
GRMZM2G136344_P02	0.939523	0.888843	0.90125	1.04247
AC196475.3_FGP005	0.946058	0.888843	0.895025	0.972655
GRMZM2G083788_P01	0.946058	0.888843	0.933033	0.946058
GRMZM2G139512_P02	0.946058	0.888843	0.965936	1.02101
GRMZM5G861800_P01	0.946058	0.888843	1.02101	0.97942
GRMZM2G061830_P02	0.952638	0.888843	0.939523	1.04247
GRMZM2G068639_P01	0.952638	0.888843	0.933033	1.03526
GRMZM2G155729_P01	0.952638	0.888843	0.939523	0.965936
GRMZM2G095126_P01	0.959264	0.888843	0.870551	1
GRMZM5G884600_P01	0.965936	0.888843	0.926588	0.993092
GRMZM2G383408_P01	0.972655	0.888843	0.882703	0.852635
GRMZM2G172826_P01	0.97942	0.888843	0.846745	0.870551
GRMZM5G872068_P01	0.97942	0.888843	0.895025	0.97942
GRMZM5G888620_P01	0.97942	0.888843	1.13288	1.02101
AC202185.4_FGP004	0.993092	0.888843	0.97942	0.965936
GRMZM2G389768_P01	0.993092	0.888843	1	1.05702
GRMZM2G457929_P01	0.993092	0.888843	0.993092	0.933033
GRMZM5G815165_P03	0.993092	0.888843	1.10191	0.946058
GRMZM2G047274_P01	1	0.888843	1.02101	1.03526
GRMZM2G049155_P01	1.00696	0.888843	0.986233	1.01396
GRMZM2G159926_P02	1.00696	0.888843	0.993092	1.10957
GRMZM2G178415_P06	1.00696	0.888843	0.959264	0.946058
GRMZM2G426242_P01	1.00696	0.888843	1.06437	1.11729
GRMZM2G064960_P01	1.01396	0.888843	1.14076	1.06437
GRMZM2G134508_P01	1.02811	0.888843	0.993092	0.993092
GRMZM6G300210_P01	1.02811	0.888843	1.03526	0.926588
GRMZM2G162388_P01	1.03526	0.888843	1.02101	0.972655
GRMZM2G324297_P02	1.04247	0.888843	1.05702	1.05702
GRMZM2G160069_P01	1.07177	0.888843	1.02101	1.03526
GRMZM2G096240_P01	1.12506	0.888843	1.06437	1
GRMZM2G013634_P01	1.14076	0.888843	0.993092	1.04247
GRMZM2G143767_P01	1.15669	0.888843	0.907519	0.972655
GRMZM2G062373_P01	1.17283	0.888843	1.09429	0.952638
GRMZM2G161696_P01	0.784584	0.895025	0.846745	0.97942
GRMZM2G073429_P01	0.80107	0.895025	0.888843	0.946058
GRMZM2G162233_P01	0.812252	0.895025	0.888843	0.946058
GRMZM5G851815_P02	0.817902	0.895025	0.882703	0.972655
GRMZM2G103902_P03	0.835088	0.895025	0.972655	0.933033
GRMZM2G163437_P01	0.840896	0.895025	0.895025	0.933033
GRMZM2G158097_P02	0.852635	0.895025	0.895025	0.965936
GRMZM2G066293_P01	0.858565	0.895025	1.03526	0.986233
GRMZM5G808402_P01	0.858565	0.895025	0.972655	0.993092
GRMZM2G031169_P01	0.864537	0.895025	0.920188	1
GRMZM2G002165_P01	0.870551	0.895025	0.952638	1
GRMZM2G395114_P01	0.870551	0.895025	1.03526	0.939523
GRMZM2G035401_P01	0.876606	0.895025	0.959264	0.882703
GRMZM2G143494_P01	0.876606	0.895025	0.784584	1.06437
GRMZM2G077222_P01	0.882703	0.895025	0.965936	1
GRMZM2G120563_P07	0.882703	0.895025	0.933033	1.02101
GRMZM2G015967_P01	0.888843	0.895025	0.933033	1.01396
GRMZM2G030097_P01	0.888843	0.895025	0.907519	0.933033
GRMZM2G057243_P01	0.888843	0.895025	0.939523	0.959264
GRMZM5G870446_P02	0.888843	0.895025	0.864537	1.00696
GRMZM2G477694_P01	0.895025	0.895025	0.907519	1.09429
GRMZM2G068316_P01	0.90125	0.895025	1.01396	1
GRMZM2G092129_P02	0.90125	0.895025	0.840896	0.933033
GRMZM2G432390_P01	0.90125	0.895025	0.959264	1.02811
GRMZM2G032684_P01	0.907519	0.895025	0.852635	1.02811
GRMZM2G108849_P04	0.907519	0.895025	0.97942	1.01396
GRMZM2G136522_P01	0.907519	0.895025	0.959264	1.01396
GRMZM2G136106_P01	0.913831	0.895025	1.01396	1.00696
GRMZM2G051247_P01	0.926588	0.895025	0.946058	1.02811
GRMZM2G416484_P02	0.926588	0.895025	0.90125	0.972655
GRMZM2G127297_P01	0.933033	0.895025	0.852635	0.959264
GRMZM2G304712_P01	0.933033	0.895025	0.90125	0.993092
GRMZM2G029194_P02	0.939523	0.895025	0.913831	1.05702
GRMZM2G163888_P01	0.939523	0.895025	0.965936	1.03526
GRMZM2G319169_P01	0.939523	0.895025	0.870551	0.913831
GRMZM5G825090_P03	0.939523	0.895025	0.993092	0.913831
GRMZM2G086464_P01	0.946058	0.895025	0.946058	1.01396
GRMZM2G087590_P01	0.946058	0.895025	0.946058	0.952638
GRMZM2G106443_P01	0.946058	0.895025	1.00696	1.04972
GRMZM2G146644_P01	0.946058	0.895025	0.959264	1.01396
GRMZM2G577677_P01	0.946058	0.895025	0.926588	1.05702
GRMZM2G474726_P01	0.959264	0.895025	0.895025	0.972655
GRMZM5G887716_P01	0.965936	0.895025	0.946058	1.04247
GRMZM2G128434_P01	0.972655	0.895025	0.972655	0.97942
GRMZM2G129804_P01	0.972655	0.895025	1	1.02101
GRMZM2G006672_P02	0.97942	0.895025	0.933033	0.933033
GRMZM2G132331_P01	0.97942	0.895025	1.05702	1.05702
GRMZM2G150256_P01	0.97942	0.895025	1.02101	1.07177
GRMZM2G415359_P02	0.97942	0.895025	0.959264	1.06437
GRMZM2G012229_P01	0.986233	0.895025	0.858565	0.993092
GRMZM2G016660_P01	0.986233	0.895025	0.97942	0.986233
GRMZM2G073079_P01	0.986233	0.895025	1.07923	1.10957
GRMZM2G303829_P01	0.986233	0.895025	1.05702	1.01396
GRMZM2G024739_P01	0.993092	0.895025	0.933033	0.888843
GRMZM2G029407_P01	0.993092	0.895025	1.01396	1.02811
AC210013.4_FGP011	1	0.895025	1.04247	1.11729
GRMZM2G001887_P01	1	0.895025	1.02811	1.06437
GRMZM2G037614_P01	1	0.895025	0.926588	1.02811
GRMZM2G076885_P01	1	0.895025	0.986233	1.02811
GRMZM2G408458_P01	1	0.895025	1.1487	0.993092
GRMZM2G099891_P02	1.01396	0.895025	0.926588	0.986233
GRMZM2G047219_P03	1.02101	0.895025	0.972655	0.986233
GRMZM2G468439_P02	1.02101	0.895025	0.90125	1.02101
GRMZM2G055276_P01	1.02811	0.895025	1.01396	1.07177
GRMZM2G017804_P01	1.03526	0.895025	1.07177	1.04972
GRMZM2G045854_P01	1.03526	0.895025	1.06437	0.993092
GRMZM2G044354_P04	1.04247	0.895025	1.07177	1.01396
GRMZM2G050971_P01	1.04247	0.895025	0.959264	1.09429
GRMZM5G821024_P01	1.06437	0.895025	0.965936	1.06437
GRMZM2G179215_P02	1.06437	0.895025	0.965936	1.02101
GRMZM2G068352_P02	1.07177	0.895025	1.04247	1.00696
GRMZM2G071010_P01	1.09429	0.895025	1.01396	1.04972
GRMZM2G008864_P01	1.10191	0.895025	1.04247	1.13288
GRMZM2G009448_P01	1.11729	0.895025	1.00696	0.972655
GRMZM2G337191_P01	1.13288	0.895025	0.952638	0.959264
GRMZM2G012123_P02	1.15669	0.895025	1.08673	1.00696
GRMZM2G359581_P01	1.15669	0.895025	1.10957	0.97942
GRMZM5G821637_P05	1.15669	0.895025	1.14076	0.864537
GRMZM2G322953_P05	0.790041	0.90125	0.926588	0.986233
GRMZM2G458728_P02	0.80107	0.90125	0.773782	0.840896
GRMZM2G031721_P01	0.840896	0.90125	0.90125	1.01396
GRMZM2G040933_P02	0.846745	0.90125	0.939523	1
GRMZM2G089136_P01	0.846745	0.90125	0.895025	0.965936
GRMZM2G164676_P02	0.846745	0.90125	0.946058	1.04972
GRMZM5G896082_P02	0.846745	0.90125	0.870551	0.946058
GRMZM2G009591_P02	0.852635	0.90125	1.00696	0.939523
GRMZM2G054050_P01	0.852635	0.90125	0.90125	0.993092
GRMZM2G060357_P01	0.858565	0.90125	1	1.04972
GRMZM2G305115_P01	0.858565	0.90125	0.812252	0.986233
GRMZM2G027219_P01	0.864537	0.90125	0.926588	1.01396
GRMZM2G104310_P03	0.864537	0.90125	0.939523	1.02101
GRMZM2G111998_P01	0.864537	0.90125	0.952638	1.03526
GRMZM2G467640_P01	0.864537	0.90125	0.864537	1.02811
GRMZM5G848603_P03	0.864537	0.90125	0.882703	0.959264
GRMZM2G097843_P01	0.870551	0.90125	0.97942	0.993092
AC177936.6_FGP008	0.876606	0.90125	0.895025	1.10957
GRMZM2G030299_P01	0.876606	0.90125	0.913831	1
GRMZM2G084881_P01	0.876606	0.90125	0.888843	0.986233
GRMZM2G377641_P01	0.876606	0.90125	0.920188	0.993092
GRMZM2G076417_P01	0.882703	0.90125	1.01396	1.00696
GRMZM2G123815_P01	0.882703	0.90125	0.946058	1.02811
GRMZM2G410991_P01	0.882703	0.90125	0.864537	1.00696
AC234091.1_FGP001	0.888843	0.90125	0.907519	0.986233
GRMZM2G083812_P01	0.895025	0.90125	0.939523	1.02811
GRMZM5G835213_P01	0.895025	0.90125	0.926588	1
GRMZM2G041175_P01	0.90125	0.90125	0.823591	1.02101
GRMZM2G135816_P03	0.90125	0.90125	1.00696	0.965936
GRMZM2G152853_P01	0.90125	0.90125	0.946058	1.10957
GRMZM5G842071_P02	0.90125	0.90125	1.14076	1.07923
GRMZM2G081017_P01	0.907519	0.90125	0.920188	1.02101
GRMZM2G163578_P01	0.907519	0.90125	0.920188	0.926588
GRMZM2G175423_P01	0.907519	0.90125	0.812252	1.02101
GRMZM2G095287_P01	0.913831	0.90125	0.959264	1
GRMZM5G876898_P01	0.913831	0.90125	0.913831	1.03526
GRMZM2G131286_P01	0.920188	0.90125	0.97942	0.972655
GRMZM2G146553_P01	0.920188	0.90125	0.965936	0.876606
GRMZM2G145518_P01	0.926588	0.90125	0.959264	1.02811
GRMZM2G154505_P01	0.926588	0.90125	1.01396	0.926588
GRMZM2G024303_P01	0.933033	0.90125	0.920188	1.00696
GRMZM2G150906_P01	0.946058	0.90125	0.993092	0.97942
GRMZM2G021299_P01	0.952638	0.90125	1.01396	1
GRMZM2G130002_P01	0.952638	0.90125	0.952638	1.10191
GRMZM5G860226_P01	0.952638	0.90125	0.933033	0.939523
GRMZM2G137535_P02	0.959264	0.90125	1.02811	1.13288
GRMZM2G150024_P01	0.972655	0.90125	0.946058	0.965936
GRMZM2G359397_P01	0.972655	0.90125	0.97942	1.04247
GRMZM2G006953_P01	0.97942	0.90125	0.959264	1.00696
GRMZM2G085747_P01	0.97942	0.90125	0.986233	0.986233
GRMZM2G101523_P02	0.97942	0.90125	1.02101	1.09429
GRMZM2G173085_P01	0.97942	0.90125	0.920188	1.02101
GRMZM2G113017_P03	0.986233	0.90125	1.00696	0.97942
GRMZM2G177781_P01	0.986233	0.90125	1.02811	1.02101
GRMZM2G117754_P01	0.993092	0.90125	0.812252	1.02811
GRMZM2G108138_P01	1	0.90125	0.993092	1.00696
GRMZM2G114399_P01	1.00696	0.90125	1.02811	1
GRMZM2G166082_P02	1.00696	0.90125	0.993092	0.993092
GRMZM2G314692_P03	1.00696	0.90125	0.993092	0.907519
GRMZM2G464401_P01	1.00696	0.90125	1	1.04972
GRMZM2G003385_P01	1.01396	0.90125	1.08673	1.00696
GRMZM2G066469_P01	1.01396	0.90125	1.02101	1.02811
GRMZM2G132875_P01	1.01396	0.90125	0.913831	0.817902
GRMZM2G051952_P02	1.02101	0.90125	0.895025	0.933033
GRMZM2G354093_P01	1.02101	0.90125	1.05702	1.11729
GRMZM2G039757_P01	1.03526	0.90125	1.04972	1.04972
GRMZM5G837626_P01	1.03526	0.90125	1	1.06437
GRMZM2G119894_P01	1.04247	0.90125	0.972655	0.972655
GRMZM2G154595_P01	1.05702	0.90125	0.965936	1.04972
GRMZM2G104258_P01	1.06437	0.90125	1.06437	1.00696
GRMZM2G407347_P04	1.07923	0.90125	1.02101	1.02811
GRMZM2G033198_P02	1.08673	0.90125	1.02811	0.986233
GRMZM2G143354_P01	1.08673	0.90125	0.965936	1.01396
GRMZM2G087192_P01	1.10191	0.90125	1.06437	1.09429
GRMZM2G117198_P01	1.1487	0.90125	1.06437	0.864537
GRMZM2G175728_P01	1.16473	0.90125	0.97942	0.959264
GRMZM2G105844_P01	1.75321	0.90125	1.03526	1.02811
GRMZM2G119736_P02	0.784584	0.907519	1.04972	1.19748
GRMZM2G327595_P01	0.80107	0.907519	0.895025	1.02101
GRMZM2G077333_P01	0.823591	0.907519	0.90125	0.952638
GRMZM2G092475_P02	0.835088	0.907519	0.993092	0.986233
GRMZM2G703582_P02	0.846745	0.907519	0.933033	0.972655
GRMZM2G068557_P01	0.852635	0.907519	0.907519	0.864537
GRMZM2G102838_P01	0.858565	0.907519	0.952638	1.03526
GRMZM2G336908_P01	0.858565	0.907519	0.946058	0.993092
GRMZM2G083016_P01	0.864537	0.907519	0.913831	0.965936
GRMZM6G828652_P01	0.864537	0.907519	0.90125	1
GRMZM2G024267_P01	0.876606	0.907519	0.946058	1.02811
GRMZM2G159160_P01	0.876606	0.907519	0.952638	0.97942
GRMZM2G026024_P01	0.882703	0.907519	0.952638	0.972655
GRMZM2G062738_P01	0.882703	0.907519	0.97942	0.993092
GRMZM2G123029_P03	0.882703	0.907519	0.90125	1.04972
GRMZM2G077531_P01	0.888843	0.907519	0.939523	0.993092
GRMZM2G096663_P01	0.888843	0.907519	0.939523	1.02101
GRMZM2G140288_P01	0.888843	0.907519	0.907519	0.986233
GRMZM2G021416_P02	0.895025	0.907519	0.926588	0.876606
GRMZM2G101250_P02	0.895025	0.907519	1	1.04972
GRMZM2G046924_P02	0.90125	0.907519	1.04247	1.06437
GRMZM2G059252_P01	0.90125	0.907519	0.972655	1.04247
GRMZM2G020775_P01	0.907519	0.907519	0.952638	1.03526
GRMZM2G057554_P01	0.913831	0.907519	0.972655	0.97942
GRMZM2G103345_P02	0.913831	0.907519	1.02811	0.939523
GRMZM2G128922_P01	0.913831	0.907519	1	0.97942
GRMZM6G732597_P01	0.913831	0.907519	0.97942	0.913831
GRMZM2G093643_P01	0.920188	0.907519	0.933033	0.986233
GRMZM2G157113_P02	0.926588	0.907519	0.846745	1.03526
GRMZM2G174048_P01	0.926588	0.907519	1.02811	0.97942
GRMZM2G000719_P01	0.933033	0.907519	0.965936	1.00696
GRMZM2G045404_P01	0.933033	0.907519	1.04972	1.14076
GRMZM2G074083_P01	0.933033	0.907519	0.972655	0.952638
GRMZM2G131205_P01	0.933033	0.907519	0.97942	0.933033
GRMZM2G479000_P01	0.933033	0.907519	0.993092	1.03526
GRMZM2G003565_P03	0.939523	0.907519	0.939523	1
GRMZM2G152877_P01	0.939523	0.907519	0.959264	0.965936
GRMZM2G412085_P01	0.939523	0.907519	1	1.04972
GRMZM2G011743_P01	0.946058	0.907519	1	0.90125
GRMZM2G136895_P01	0.952638	0.907519	1.02811	1.06437
GRMZM2G015132_P01	0.959264	0.907519	1.00696	1.01396
GRMZM2G064799_P01	0.959264	0.907519	0.965936	1.00696
GRMZM2G080044_P01	0.959264	0.907519	0.952638	1.02101
AC208341.4_FGP005	0.972655	0.907519	0.913831	1.02101
GRMZM2G104283_P01	0.972655	0.907519	0.876606	0.933033
GRMZM2G134227_P03	0.972655	0.907519	1.02811	1.00696
GRMZM2G156145_P01	0.972655	0.907519	1	1.04247
GRMZM2G103430_P02	0.97942	0.907519	1.02811	1.10957
GRMZM2G141009_P01	0.97942	0.907519	1.05702	0.986233
GRMZM5G848768_P02	0.97942	0.907519	0.986233	1.03526
GRMZM2G055678_P01	0.993092	0.907519	0.993092	1.07177
GRMZM2G384327_P03	0.993092	0.907519	0.946058	1.02811
GRMZM2G082640_P01	1	0.907519	0.965936	1.06437
GRMZM2G125310_P01	1	0.907519	0.972655	1.02811
GRMZM2G171921_P06	1	0.907519	1	1.07177
GRMZM2G126453_P01	1.00696	0.907519	0.946058	1.02101
GRMZM2G153409_P01	1.00696	0.907519	0.952638	1.04247
GRMZM5G890190_P01	1.00696	0.907519	0.972655	1
GRMZM2G004006_P02	1.02101	0.907519	0.907519	0.907519
GRMZM2G089484_P01	1.02101	0.907519	0.965936	1.03526
GRMZM2G004523_P01	1.02811	0.907519	0.993092	1.00696
GRMZM2G014813_P02	1.02811	0.907519	1.01396	1.05702
GRMZM2G045716_P01	1.02811	0.907519	1.07923	1.02101
GRMZM2G101142_P01	1.02811	0.907519	0.946058	1
GRMZM2G150952_P01	1.02811	0.907519	1.07923	1.01396
GRMZM2G172258_P01	1.02811	0.907519	1.05702	1.05702
GRMZM5G870932_P01	1.02811	0.907519	0.920188	1.07177
GRMZM2G101130_P01	1.03526	0.907519	0.926588	1.05702
GRMZM2G429000_P01	1.03526	0.907519	1.07923	1.04972
GRMZM2G052416_P01	1.05702	0.907519	1.08673	1
GRMZM2G103526_P01	1.05702	0.907519	0.965936	1.10957
GRMZM2G008353_P01	1.06437	0.907519	0.959264	0.993092
GRMZM2G375807_P01	1.07923	0.907519	0.97942	0.933033
GRMZM2G005205_P02	1.11729	0.907519	1	1.05702
GRMZM5G855672_P02	1.12506	0.907519	0.972655	0.888843
GRMZM2G180815_P01	1.22264	0.907519	1.07177	1.1487
GRMZM2G035256_P01	0.823591	0.913831	0.876606	1.03526
GRMZM2G010494_P01	0.835088	0.913831	1.02101	1.13288
GRMZM2G412611_P01	0.846745	0.913831	0.97942	1.02811
GRMZM2G051782_P01	0.852635	0.913831	0.806642	0.920188
GRMZM2G128012_P01	0.852635	0.913831	0.959264	0.806642
GRMZM5G833389_P02	0.852635	0.913831	0.907519	1.02811
GRMZM2G116670_P02	0.858565	0.913831	1.02811	0.895025
GRMZM2G141858_P01	0.858565	0.913831	0.858565	1.02811
GRMZM2G069009_P01	0.864537	0.913831	0.965936	1.02101
GRMZM2G007907_P01	0.864537	0.913831	0.965936	0.993092
GRMZM2G041022_P01	0.864537	0.913831	0.852635	1.07923
GRMZM2G105755_P02	0.864537	0.913831	0.939523	0.933033
GRMZM2G329040_P02	0.864537	0.913831	0.920188	0.986233
GRMZM2G030628_P01	0.870551	0.913831	0.959264	0.97942
GRMZM2G129513_P01	0.876606	0.913831	0.939523	0.939523
GRMZM5G815808_P01	0.876606	0.913831	0.926588	0.986233
AC211737.3_FGP012	0.882703	0.913831	0.907519	1.02101
GRMZM2G003563_P01	0.882703	0.913831	0.852635	1.10191
GRMZM2G019404_P01	0.882703	0.913831	0.933033	1
GRMZM2G009715_P02	0.895025	0.913831	0.933033	0.993092
GRMZM2G009785_P01	0.895025	0.913831	0.920188	0.993092
GRMZM2G045581_P01	0.895025	0.913831	0.97942	0.946058
GRMZM2G053284_P01	0.895025	0.913831	0.895025	1.02101
GRMZM2G054405_P01	0.895025	0.913831	0.926588	0.907519
GRMZM2G094526_P01	0.895025	0.913831	0.90125	0.952638
GRMZM2G110408_P01	0.895025	0.913831	0.965936	0.993092
GRMZM2G118462_P01	0.895025	0.913831	0.913831	1.02811
GRMZM2G082998_P01	0.90125	0.913831	0.952638	0.97942
AC148152.3_FGP008	0.907519	0.913831	0.920188	0.972655
GRMZM2G421829_P01	0.907519	0.913831	0.993092	0.952638
GRMZM2G083173_P01	0.913831	0.913831	0.97942	1.03526
GRMZM2G180983_P02	0.913831	0.913831	0.946058	1.02811
GRMZM2G044247_P01	0.920188	0.913831	0.986233	1.06437
GRMZM2G129208_P03	0.920188	0.913831	0.939523	1.00696
AC214350.3_FGP007	0.926588	0.913831	0.972655	0.913831
GRMZM2G055684_P01	0.926588	0.913831	0.933033	0.97942
GRMZM2G070138_P01	0.926588	0.913831	0.920188	1.02101
GRMZM2G106061_P01	0.926588	0.913831	0.965936	1.03526
GRMZM2G428391_P01	0.926588	0.913831	0.888843	0.993092
GRMZM2G100976_P01	0.933033	0.913831	0.946058	0.993092
GRMZM2G018484_P01	0.939523	0.913831	0.888843	1.02101
GRMZM2G049798_P01	0.939523	0.913831	0.870551	1.06437
GRMZM2G079668_P02	0.939523	0.913831	0.920188	1.08673
GRMZM2G085909_P01	0.939523	0.913831	0.888843	0.876606
GRMZM2G163798_P01	0.939523	0.913831	0.97942	1.02811
GRMZM2G367638_P01	0.939523	0.913831	0.959264	0.959264
GRMZM2G053273_P02	0.946058	0.913831	0.939523	0.972655
GRMZM2G164308_P03	0.952638	0.913831	1	1.07177
GRMZM2G058685_P01	0.959264	0.913831	0.993092	1.00696
GRMZM2G140917_P01	0.959264	0.913831	0.97942	0.986233
GRMZM2G574782_P01	0.959264	0.913831	0.965936	1
AC204539.4_FGP002	0.965936	0.913831	1.05702	0.993092
GRMZM2G067727_P01	0.965936	0.913831	0.993092	1.02811
GRMZM2G024823_P02	0.972655	0.913831	0.965936	1.01396
GRMZM2G097820_P01	0.972655	0.913831	1.00696	1.06437
GRMZM2G139614_P01	0.97942	0.913831	0.993092	1.07923
GRMZM2G355523_P01	0.97942	0.913831	1.05702	1.01396
GRMZM2G017159_P01	0.986233	0.913831	0.986233	1.00696
GRMZM2G151041_P01	0.986233	0.913831	0.965936	0.972655
GRMZM2G151387_P01	0.986233	0.913831	1.00696	1.06437
GRMZM2G126988_P01	0.993092	0.913831	1.04247	1.15669
GRMZM2G012958_P01	1	0.913831	0.97942	0.972655
GRMZM2G154093_P01	1	0.913831	1.01396	0.993092
GRMZM2G134866_P01	1.00696	0.913831	1.03526	1.00696
GRMZM2G124476_P02	1.00696	0.913831	1.01396	1.03526
GRMZM2G013115_P02	1.00696	0.913831	1.06437	1.11729
GRMZM2G048497_P01	1.00696	0.913831	1.01396	0.97942
GRMZM2G061088_P01	1.00696	0.913831	1.03526	1.01396
GRMZM2G123719_P01	1.01396	0.913831	1	0.965936
GRMZM2G319465_P01	1.01396	0.913831	0.965936	1.02811
GRMZM5G876621_P02	1.02101	0.913831	1.14076	0.97942
GRMZM2G061277_P03	1.02811	0.913831	1.04247	1
GRMZM2G130440_P02	1.02811	0.913831	0.959264	1.04972
GRMZM2G168888_P01	1.02811	0.913831	0.972655	1.00696
GRMZM2G126834_P02	1.04972	0.913831	0.907519	0.846745
GRMZM2G046274_P01	1.04972	0.913831	1.03526	0.986233
GRMZM2G114107_P01	1.06437	0.913831	1.03526	1.01396
GRMZM2G162276_P01	1.08673	0.913831	1.02811	1.08673
GRMZM2G457415_P01	1.08673	0.913831	0.933033	1.00696
GRMZM2G134134_P02	1.09429	0.913831	0.933033	0.986233
GRMZM2G420743_P01	1.10191	0.913831	1	1
GRMZM2G130749_P01	1.10957	0.913831	1.04972	0.959264
GRMZM2G154169_P01	1.10957	0.913831	1.09429	1.04972
GRMZM2G169486_P01	1.13288	0.913831	1.04972	1.10191
GRMZM2G441144_P01	1.15669	0.913831	0.90125	0.972655
GRMZM2G463640_P01	0.80107	0.920188	0.913831	0.986233
GRMZM2G073693_P01	0.806642	0.920188	0.97942	0.986233
GRMZM2G092793_P01	0.812252	0.920188	0.926588	0.913831
GRMZM2G111501_P01	0.835088	0.920188	0.895025	0.959264
GRMZM2G131853_P01	0.840896	0.920188	0.965936	0.926588
GRMZM2G044697_P05	0.846745	0.920188	0.939523	0.97942
GRMZM2G341027_P01	0.846745	0.920188	1.07923	1.04247
GRMZM2G072865_P01	0.852635	0.920188	0.993092	0.993092
GRMZM2G170927_P01	0.852635	0.920188	0.876606	0.986233
GRMZM2G136803_P02	0.858565	0.920188	0.907519	0.986233
GRMZM2G030880_P01	0.864537	0.920188	1.10191	0.90125
GRMZM2G031572_P01	0.882703	0.920188	0.972655	1.00696
GRMZM2G086088_P03	0.882703	0.920188	0.870551	0.993092
GRMZM2G086030_P01	0.888843	0.920188	0.939523	0.888843
GRMZM2G113340_P01	0.888843	0.920188	0.959264	0.946058
GRMZM5G884137_P01	0.90125	0.920188	0.939523	0.946058
GRMZM5G859195_P01	0.90125	0.920188	0.959264	1.02811
GRMZM2G086994_P01	0.913831	0.920188	0.933033	1.09429
GRMZM2G162527_P01	0.920188	0.920188	0.939523	0.97942
GRMZM2G009282_P01	0.926588	0.920188	0.972655	1.02811
GRMZM2G085411_P01	0.926588	0.920188	0.90125	1.00696
GRMZM2G174107_P01	0.926588	0.920188	0.913831	0.993092
GRMZM2G066575_P01	0.933033	0.920188	1.01396	0.986233
GRMZM2G152485_P03	0.933033	0.920188	0.97942	0.965936
GRMZM2G154578_P01	0.933033	0.920188	0.946058	1.08673
GRMZM2G003246_P01	0.946058	0.920188	0.97942	1
GRMZM2G029641_P01	0.946058	0.920188	1.04247	1.02101
GRMZM2G145850_P01	0.946058	0.920188	1.00696	0.972655
GRMZM2G407996_P01	0.946058	0.920188	1.02101	1.05702
GRMZM5G877941_P01	0.946058	0.920188	1	1.04247
GRMZM2G305582_P01	0.952638	0.920188	1.00696	1.04972
GRMZM2G044337_P01	0.952638	0.920188	0.933033	1
GRMZM2G102639_P01	0.952638	0.920188	0.986233	1.07923
GRMZM2G045090_P01	0.959264	0.920188	0.965936	1.02101
GRMZM5G810061_P01	0.959264	0.920188	0.972655	1.02811
GRMZM2G095206_P02	0.965936	0.920188	0.90125	0.965936
GRMZM2G131243_P02	0.965936	0.920188	1.04247	1.06437
GRMZM2G132358_P01	0.965936	0.920188	0.926588	0.959264
GRMZM2G168335_P01	0.965936	0.920188	1.01396	1.08673
GRMZM2G004128_P01	0.972655	0.920188	1.01396	1.07177
GRMZM5G892758_P01	0.972655	0.920188	0.926588	0.959264
GRMZM2G050108_P01	0.97942	0.920188	1.04972	1.01396
GRMZM2G103079_P01	0.97942	0.920188	0.933033	1.09429
GRMZM2G178958_P01	0.97942	0.920188	0.952638	1.02101
GRMZM5G830403_P02	0.97942	0.920188	0.952638	1.02101
GRMZM2G060185_P01	0.986233	0.920188	0.965936	1.06437
GRMZM2G152526_P01	0.986233	0.920188	0.959264	1.04972
GRMZM2G053514_P01	0.993092	0.920188	0.993092	1.01396
GRMZM2G069024_P06	0.993092	0.920188	0.972655	0.993092
GRMZM2G374779_P01	0.993092	0.920188	0.993092	0.965936
GRMZM2G049296_P01	1.00696	0.920188	0.972655	1.01396
GRMZM2G549512_P01	1.01396	0.920188	0.946058	1.04972
GRMZM2G140537_P01	1.02101	0.920188	0.840896	0.882703
GRMZM2G177937_P01	1.02101	0.920188	1.10191	1
GRMZM2G398288_P01	1.02101	0.920188	0.946058	1.02811
GRMZM2G478568_P01	1.02101	0.920188	1.08673	1.00696
GRMZM2G079538_P02	1.02811	0.920188	1	1.05702
GRMZM2G465769_P01	1.02811	0.920188	0.993092	0.97942
GRMZM2G055217_P01	1.03526	0.920188	1.04247	0.993092
GRMZM2G090573_P01	1.03526	0.920188	0.972655	0.972655
GRMZM2G053019_P01	1.04972	0.920188	1.00696	1.03526
GRMZM2G090177_P01	1.04972	0.920188	0.882703	1.08673
GRMZM2G103342_P01	1.04972	0.920188	0.993092	1.16473
GRMZM2G161932_P02	1.04972	0.920188	1.04247	0.97942
GRMZM2G348866_P01	1.04972	0.920188	0.959264	1.13288
GRMZM2G319062_P01	1.06437	0.920188	1.05702	0.972655
AC198518.3_FGP003	1.07923	0.920188	1.03526	1.07923
GRMZM2G161274_P02	1.08673	0.920188	1.13288	1.04972
GRMZM2G002440_P01	1.09429	0.920188	1.08673	1.02101
GRMZM5G898735_P02	1.10191	0.920188	1.22264	0.986233
GRMZM2G152777_P01	0.779165	0.926588	0.986233	0.939523
GRMZM2G016066_P01	0.784584	0.926588	1	1.03526
GRMZM5G873519_P02	0.806642	0.926588	0.920188	0.972655
GRMZM2G343149_P01	0.82932	0.926588	0.986233	0.965936
GRMZM2G471904_P01	0.835088	0.926588	0.952638	0.952638
GRMZM5G866223_P01	0.835088	0.926588	0.913831	0.965936
GRMZM2G074103_P01	0.864537	0.926588	0.946058	1.02101
GRMZM2G320307_P01	0.876606	0.926588	0.90125	1.00696
GRMZM2G466560_P01	0.876606	0.926588	0.959264	0.993092
GRMZM2G002756_P01	0.882703	0.926588	0.952638	0.895025
GRMZM2G087598_P02	0.882703	0.926588	1.00696	0.965936
GRMZM2G141473_P01	0.882703	0.926588	0.90125	0.986233
GRMZM2G013255_P01	0.888843	0.926588	0.965936	1.02101
GRMZM2G081910_P01	0.895025	0.926588	0.986233	0.97942
GRMZM2G018006_P01	0.90125	0.926588	0.965936	1.02101
GRMZM2G023387_P01	0.90125	0.926588	0.965936	1.00696
GRMZM2G067853_P01	0.90125	0.926588	0.952638	1.02811
GRMZM2G122563_P01	0.90125	0.926588	0.952638	0.858565
GRMZM2G062044_P01	0.907519	0.926588	0.90125	0.926588
GRMZM2G016774_P01	0.913831	0.926588	0.965936	1.02101
GRMZM2G080816_P01	0.913831	0.926588	1.02101	0.993092
GRMZM2G140782_P01	0.913831	0.926588	0.946058	0.946058
GRMZM2G035073_P01	0.920188	0.926588	0.864537	0.959264
GRMZM2G083935_P01	0.920188	0.926588	0.913831	1.04972
GRMZM2G117100_P01	0.920188	0.926588	0.895025	1.02101
GRMZM2G178346_P01	0.920188	0.926588	0.993092	1.10191
GRMZM2G379021_P02	0.920188	0.926588	0.952638	0.946058
GRMZM2G389233_P03	0.920188	0.926588	0.939523	1.00696
GRMZM2G050193_P01	0.926588	0.926588	0.939523	0.993092
GRMZM2G054267_P01	0.926588	0.926588	0.959264	1.00696
GRMZM2G071582_P02	0.926588	0.926588	0.959264	1.05702
GRMZM2G072861_P01	0.926588	0.926588	1.02101	0.972655
GRMZM2G116586_P01	0.926588	0.926588	0.952638	1.02101
GRMZM2G157329_P01	0.926588	0.926588	0.986233	1.08673
GRMZM2G071163_P01	0.933033	0.926588	0.993092	0.97942
GRMZM2G089121_P02	0.933033	0.926588	0.965936	0.993092
GRMZM2G097249_P01	0.933033	0.926588	1.14076	1.04972
GRMZM2G032348_P05	0.946058	0.926588	0.946058	1.04972
GRMZM2G092379_P02	0.946058	0.926588	0.993092	0.97942
GRMZM2G176546_P01	0.946058	0.926588	0.933033	1.03526
GRMZM2G037778_P01	0.952638	0.926588	1.02811	1.07923
GRMZM2G083418_P01	0.952638	0.926588	1.00696	1.04247
GRMZM2G449355_P02	0.952638	0.926588	1.07923	0.946058
GRMZM2G036720_P01	0.965936	0.926588	0.986233	0.993092
GRMZM2G042164_P02	0.972655	0.926588	1.04972	0.97942
GRMZM2G152179_P01	0.972655	0.926588	1.07923	1.04247
GRMZM2G042173_P01	0.97942	0.926588	0.965936	1.01396
GRMZM2G049588_P01	0.97942	0.926588	1.03526	0.97942
GRMZM2G069092_P01	0.97942	0.926588	0.965936	1.07923
GRMZM2G077253_P01	0.986233	0.926588	0.986233	1.06437
GRMZM5G874478_P03	0.986233	0.926588	0.993092	1.04972
GRMZM2G105317_P03	0.993092	0.926588	0.920188	0.972655
GRMZM2G096591_P01	0.993092	0.926588	0.993092	1.04247
GRMZM2G116689_P03	0.993092	0.926588	0.888843	0.972655
GRMZM2G304212_P01	0.993092	0.926588	0.882703	1.03526
GRMZM2G366402_P01	0.993092	0.926588	0.97942	1.10957
GRMZM2G028914_P01	1.00696	0.926588	0.993092	1.00696
GRMZM2G141600_P01	1.00696	0.926588	1.04247	1.07923
GRMZM2G463996_P01	1.00696	0.926588	1.00696	0.993092
GRMZM2G038013_P01	1.01396	0.926588	1.10957	1.08673
GRMZM2G048549_P01	1.01396	0.926588	0.965936	1.04247
AC233922.1_FGP005	1.02101	0.926588	0.952638	1.04247
GRMZM2G066602_P01	1.02101	0.926588	1.10191	1.09429
GRMZM2G458549_P01	1.02811	0.926588	0.959264	1.01396
GRMZM5G881605_P01	1.03526	0.926588	1.09429	1.1487
GRMZM2G018417_P01	1.04247	0.926588	0.933033	1.06437
GRMZM2G015784_P03	1.04972	0.926588	1.03526	1.08673
GRMZM2G088847_P04	1.04972	0.926588	0.920188	1.02811
GRMZM2G301934_P01	1.04972	0.926588	0.959264	1.02101
GRMZM2G039889_P05	1.05702	0.926588	1.03526	0.993092
GRMZM2G110929_P01	1.05702	0.926588	0.965936	1.07177
GRMZM2G055538_P02	1.07923	0.926588	1.02101	1
GRMZM2G082019_P01	1.09429	0.926588	1.08673	0.993092
GRMZM2G161097_P01	1.10191	0.926588	1.04972	1.05702
GRMZM2G045280_P01	1.10957	0.926588	1.03526	1.04247
GRMZM2G069201_P01	1.12506	0.926588	1.15669	1.04972
GRMZM2G165137_P01	1.13288	0.926588	1.05702	1.01396
GRMZM2G359127_P01	1.13288	0.926588	1.02811	0.972655
GRMZM2G146020_P02	1.23114	0.926588	1.02811	0.993092
GRMZM2G004511_P01	1.23114	0.926588	1.02101	1.04247
GRMZM2G082185_P01	0.823591	0.933033	0.876606	1.02811
GRMZM2G098973_P01	0.82932	0.933033	0.870551	0.920188
GRMZM2G129451_P02	0.82932	0.933033	0.939523	1.00696
GRMZM2G148167_P01	0.846745	0.933033	1.01396	1.01396
GRMZM2G019783_P01	0.858565	0.933033	1.04247	1.02811
GRMZM2G042313_P01	0.858565	0.933033	1.07177	1.02101
GRMZM2G320269_P01	0.858565	0.933033	1	1.10191
GRMZM2G054896_P01	0.864537	0.933033	0.972655	1.11729
GRMZM2G085967_P03	0.864537	0.933033	1.05702	1.04972
GRMZM5G883741_P02	0.864537	0.933033	0.907519	1.02101
GRMZM2G018074_P01	0.870551	0.933033	0.946058	1.01396
GRMZM2G023591_P01	0.870551	0.933033	0.946058	1.01396
GRMZM2G067789_P01	0.870551	0.933033	0.959264	1
GRMZM2G154532_P06	0.876606	0.933033	0.888843	0.946058
GRMZM2G157350_P01	0.876606	0.933033	0.895025	0.959264
GRMZM2G081970_P01	0.882703	0.933033	0.959264	0.993092
GRMZM2G124047_P02	0.882703	0.933033	0.790041	1.04247
GRMZM2G009681_P01	0.888843	0.933033	0.933033	0.993092
GRMZM2G150796_P01	0.888843	0.933033	0.939523	0.986233
GRMZM2G000261_P01	0.895025	0.933033	0.993092	0.97942
GRMZM2G031496_P01	0.895025	0.933033	0.882703	1
GRMZM2G052479_P01	0.895025	0.933033	0.952638	1
GRMZM2G536644_P01	0.895025	0.933033	1.00696	1.01396
GRMZM5G885766_P01	0.895025	0.933033	0.972655	0.97942
GRMZM2G004534_P01	0.90125	0.933033	0.933033	0.993092
GRMZM2G467338_P02	0.90125	0.933033	0.858565	0.907519
GRMZM2G079381_P01	0.907519	0.933033	0.97942	1.02101
GRMZM2G137849_P01	0.907519	0.933033	0.952638	1.02811
GRMZM2G077541_P02	0.913831	0.933033	0.913831	1.00696
GRMZM2G078650_P02	0.913831	0.933033	0.952638	1.02811
GRMZM2G110572_P02	0.913831	0.933033	0.907519	1
GRMZM5G845129_P01	0.913831	0.933033	0.933033	0.97942
GRMZM2G021331_P01	0.920188	0.933033	0.920188	0.993092
GRMZM2G166877_P01	0.920188	0.933033	0.920188	0.876606
GRMZM2G436533_P01	0.920188	0.933033	0.959264	1.05702
GRMZM2G029573_P01	0.926588	0.933033	0.926588	1.01396
GRMZM2G110063_P02	0.926588	0.933033	1.03526	1.12506
GRMZM2G126128_P01	0.926588	0.933033	0.97942	0.986233
GRMZM2G351482_P01	0.926588	0.933033	0.946058	1.02101
GRMZM2G017257_P01	0.933033	0.933033	0.959264	0.986233
GRMZM2G155974_P01	0.933033	0.933033	0.959264	0.993092
GRMZM2G172322_P01	0.933033	0.933033	0.959264	1.03526
GRMZM2G180418_P01	0.933033	0.933033	1.02811	1.04972
GRMZM2G375984_P02	0.933033	0.933033	0.959264	1.03526
GRMZM2G028921_P01	0.939523	0.933033	0.926588	1.01396
GRMZM2G173030_P01	0.939523	0.933033	0.986233	1.06437
GRMZM2G400173_P01	0.939523	0.933033	0.986233	0.972655
GRMZM2G413647_P01	0.939523	0.933033	0.933033	1.04247
AC211394.4_FGP004	0.946058	0.933033	0.97942	0.993092
GRMZM2G076631_P01	0.952638	0.933033	0.97942	0.858565
GRMZM2G111475_P01	0.952638	0.933033	1.01396	1.07923
GRMZM2G351074_P01	0.952638	0.933033	0.97942	1.01396
GRMZM5G859592_P01	0.952638	0.933033	0.946058	1.01396
GRMZM2G008456_P01	0.959264	0.933033	0.959264	1.04972
GRMZM2G015033_P01	0.959264	0.933033	0.97942	1.02811
GRMZM2G339563_P01	0.965936	0.933033	0.913831	1.00696
GRMZM2G013650_P01	0.972655	0.933033	0.959264	1.02101
GRMZM2G102786_P01	0.972655	0.933033	0.926588	1
GRMZM2G103287_P01	0.972655	0.933033	0.933033	0.97942
GRMZM2G381051_P03	0.972655	0.933033	0.952638	1.05702
AC212068.4_FGP005	0.97942	0.933033	0.965936	1.05702
GRMZM2G007140_P01	0.97942	0.933033	0.993092	0.952638
GRMZM2G019673_P01	0.97942	0.933033	0.926588	0.993092
GRMZM2G032003_P05	0.97942	0.933033	0.913831	0.933033
GRMZM2G113495_P01	0.97942	0.933033	0.913831	0.933033
GRMZM2G132060_P01	0.97942	0.933033	0.97942	1.00696
GRMZM2G170061_P01	0.97942	0.933033	1.05702	1
GRMZM2G336065_P01	0.97942	0.933033	1	1.13288
GRMZM2G349062_P01	0.97942	0.933033	0.952638	0.959264
GRMZM2G365774_P01	0.97942	0.933033	0.965936	1.02101
GRMZM2G127632_P01	0.986233	0.933033	0.993092	1.04247
GRMZM2G035709_P02	0.993092	0.933033	0.972655	1.02811
GRMZM2G137495_P01	0.993092	0.933033	1.05702	1.06437
GRMZM5G839512_P01	0.993092	0.933033	1.02811	1.02811
GRMZM5G874903_P01	0.993092	0.933033	0.97942	1
GRMZM2G042136_P02	1	0.933033	0.972655	1.01396
GRMZM2G126386_P01	1	0.933033	0.952638	0.952638
GRMZM2G165926_P01	1	0.933033	0.946058	0.97942
GRMZM2G071034_P01	1.00696	0.933033	1.03526	1.03526
GRMZM2G025281_P02	1.00696	0.933033	1.04247	1.10957
GRMZM2G128491_P01	1.00696	0.933033	1.07177	0.986233
GRMZM2G065585_P01	1.01396	0.933033	0.840896	1.01396
GRMZM2G130034_P01	1.01396	0.933033	0.959264	0.946058
GRMZM2G180422_P01	1.01396	0.933033	0.939523	1.06437
GRMZM2G335280_P01	1.01396	0.933033	1.02811	1.06437
GRMZM2G376416_P02	1.01396	0.933033	1.01396	0.972655
GRMZM2G017351_P01	1.02101	0.933033	0.946058	0.895025
GRMZM2G114182_P01	1.02101	0.933033	1.02811	0.913831
GRMZM2G015159_P01	1.02811	0.933033	1.04972	1.02811
GRMZM2G037378_P01	1.02811	0.933033	1.01396	1.01396
GRMZM2G043663_P01	1.02811	0.933033	1.05702	1.02811
GRMZM2G093119_P01	1.02811	0.933033	1.01396	0.986233
GRMZM2G105207_P01	1.02811	0.933033	1.00696	1.02811
GRMZM2G162764_P01	1.03526	0.933033	1.03526	0.946058
GRMZM2G479906_P01	1.03526	0.933033	1.05702	1.04247
GRMZM2G037177_P01	1.04247	0.933033	0.97942	1.07177
GRMZM2G024992_P01	1.04972	0.933033	1.03526	0.986233
GRMZM5G841142_P02	1.04972	0.933033	0.939523	1.00696
GRMZM2G176910_P01	1.05702	0.933033	0.965936	1.04972
GRMZM2G055243_P01	1.06437	0.933033	1.11729	0.888843
GRMZM2G023023_P01	1.06437	0.933033	0.913831	0.946058
GRMZM2G401934_P03	1.07177	0.933033	1.03526	0.993092
GRMZM2G413193_P01	1.07177	0.933033	1.05702	1.07177
GRMZM2G048085_P01	1.07923	0.933033	0.972655	1.01396
GRMZM2G149543_P01	1.08673	0.933033	1.17283	1.18099
GRMZM2G347541_P01	1.08673	0.933033	1.15669	1.07177
GRMZM2G005646_P01	1.09429	0.933033	1.04972	1.06437
AC210517.3_FGP003	1.11729	0.933033	1.01396	1.02811
GRMZM2G017532_P01	1.11729	0.933033	0.965936	0.882703
GRMZM2G105772_P01	1.12506	0.933033	1.07923	1.04247
GRMZM2G080041_P01	1.16473	0.933033	1.07923	1.13288
GRMZM5G810275_P01	1.19748	0.933033	1.09429	1.09429
GRMZM2G060284_P01	1.20581	0.933033	1.13288	1.03526
GRMZM2G026470_P01	1.34723	0.933033	1.10957	1.11729
GRMZM2G097109_P01	0.852635	0.939523	0.913831	1.00696
GRMZM2G105991_P01	0.858565	0.939523	0.858565	0.972655
GRMZM2G050514_P03	0.864537	0.939523	0.913831	0.972655
GRMZM2G556131_P02	0.864537	0.939523	0.959264	1.06437
GRMZM2G087094_P01	0.870551	0.939523	0.986233	1.02811
GRMZM2G088196_P01	0.870551	0.939523	0.965936	1.07923
GRMZM2G105184_P01	0.870551	0.939523	0.952638	1.07177
GRMZM2G085577_P01	0.882703	0.939523	0.946058	0.993092
GRMZM2G372297_P01	0.882703	0.939523	0.933033	0.952638
GRMZM2G414844_P01	0.888843	0.939523	0.986233	1.05702
AC217840.3_FGP001	0.888843	0.939523	0.926588	0.986233
GRMZM2G083841_P01	0.888843	0.939523	0.920188	0.920188
GRMZM2G444541_P03	0.888843	0.939523	0.920188	1.04247
GRMZM5G828229_P02	0.888843	0.939523	0.972655	1.02101
GRMZM2G048277_P02	0.895025	0.939523	0.952638	1.07177
GRMZM2G003883_P01	0.90125	0.939523	0.913831	0.986233
GRMZM2G037185_P01	0.90125	0.939523	0.986233	1.05702
GRMZM2G104325_P01	0.90125	0.939523	1.01396	0.986233
GRMZM2G163193_P02	0.90125	0.939523	1.02101	1.03526
GRMZM2G312244_P01	0.90125	0.939523	0.946058	0.913831
AC208571.4_FGP001	0.920188	0.939523	0.913831	1.02101
GRMZM2G006428_P01	0.920188	0.939523	1.01396	1.03526
GRMZM2G008507_P01	0.920188	0.939523	0.888843	0.946058
GRMZM2G040300_P02	0.920188	0.939523	0.986233	1.02811
GRMZM2G074395_P01	0.920188	0.939523	0.895025	1.11729
GRMZM2G080650_P01	0.920188	0.939523	0.882703	0.946058
GRMZM2G082322_P01	0.920188	0.939523	1	1
GRMZM2G084192_P01	0.920188	0.939523	1.00696	1.00696
GRMZM2G033634_P01	0.926588	0.939523	0.959264	0.986233
GRMZM2G042245_P01	0.926588	0.939523	0.952638	1.02811
GRMZM2G062554_P01	0.926588	0.939523	0.920188	1.06437
GRMZM2G086876_P01	0.926588	0.939523	0.933033	1.06437
GRMZM2G105330_P01	0.926588	0.939523	1.09429	0.965936
GRMZM2G432128_P01	0.926588	0.939523	0.835088	1
GRMZM2G701207_P01	0.926588	0.939523	0.926588	0.882703
GRMZM2G055857_P01	0.933033	0.939523	0.952638	0.986233
GRMZM2G067908_P01	0.933033	0.939523	0.913831	1.02101
GRMZM2G080499_P01	0.933033	0.939523	0.939523	1.04247
GRMZM2G094390_P01	0.933033	0.939523	0.965936	1.03526
GRMZM2G111269_P01	0.933033	0.939523	0.959264	1.02811
GRMZM2G149383_P01	0.933033	0.939523	0.965936	0.97942
GRMZM2G476810_P01	0.933033	0.939523	1.00696	1.04972
GRMZM2G001820_P01	0.939523	0.939523	0.993092	1.02811
GRMZM2G029566_P01	0.939523	0.939523	1.02101	1.00696
GRMZM2G041050_P02	0.939523	0.939523	1.01396	1.02101
GRMZM2G159028_P01	0.939523	0.939523	0.986233	1.01396
GRMZM2G166639_P01	0.939523	0.939523	0.939523	1.06437
GRMZM2G169005_P01	0.939523	0.939523	1.06437	0.939523
GRMZM2G366065_P01	0.939523	0.939523	1.02811	1.00696
GRMZM2G019434_P01	0.946058	0.939523	0.993092	1.04972
GRMZM2G022192_P01	0.946058	0.939523	0.986233	1.03526
GRMZM2G071166_P03	0.946058	0.939523	1.01396	0.920188
GRMZM2G141491_P01	0.946058	0.939523	0.817902	0.933033
GRMZM2G146267_P02	0.952638	0.939523	1.02811	0.965936
GRMZM2G055807_P02	0.959264	0.939523	0.939523	1.02811
GRMZM2G076946_P02	0.959264	0.939523	0.939523	1.02101
GRMZM2G098423_P01	0.959264	0.939523	1.02811	1.04972
GRMZM2G002391_P02	0.965936	0.939523	0.965936	1.07177
GRMZM2G113139_P01	0.965936	0.939523	0.965936	1.02101
GRMZM2G131482_P02	0.965936	0.939523	0.946058	1.10191
GRMZM2G009808_P01	0.972655	0.939523	1.02101	1.06437
GRMZM2G065073_P02	0.972655	0.939523	0.97942	1
GRMZM2G171556_P03	0.972655	0.939523	0.920188	1.02101
GRMZM2G041818_P01	0.97942	0.939523	0.986233	0.926588
GRMZM2G361652_P02	0.97942	0.939523	0.920188	0.97942
GRMZM2G051879_P05	0.986233	0.939523	0.946058	1.05702
GRMZM2G070659_P01	0.986233	0.939523	0.939523	1.02811
GRMZM2G100913_P02	0.986233	0.939523	1.00696	1.00696
GRMZM2G320325_P02	0.986233	0.939523	0.965936	1.00696
GRMZM2G378604_P01	0.986233	0.939523	1.01396	1.05702
GRMZM2G427097_P01	0.986233	0.939523	0.972655	0.986233
GRMZM2G039238_P01	0.993092	0.939523	1.01396	0.986233
GRMZM2G145473_P01	0.993092	0.939523	1.09429	1.12506
GRMZM2G153984_P01	0.993092	0.939523	0.939523	0.986233
GRMZM2G028218_P02	1	0.939523	0.933033	0.986233
GRMZM2G061910_P01	1	0.939523	0.993092	1.07177
GRMZM2G078480_P01	1	0.939523	0.946058	1
GRMZM2G086484_P02	1	0.939523	1.07923	1.06437
GRMZM2G014395_P01	1.00696	0.939523	0.933033	0.986233
GRMZM2G064390_P01	1.00696	0.939523	1.02101	1.04972
GRMZM2G169207_P01	1.00696	0.939523	0.965936	0.993092
GRMZM2G312521_P01	1.00696	0.939523	0.965936	1.03526
AC206788.3_FGP015	1.01396	0.939523	0.888843	0.986233
GRMZM2G060540_P01	1.01396	0.939523	1.03526	1.10957
GRMZM2G147332_P01	1.01396	0.939523	1.04247	1.02811
GRMZM2G081571_P04	1.02101	0.939523	1.02101	1.04972
GRMZM2G129238_P01	1.02101	0.939523	1.03526	0.97942
GRMZM2G130095_P01	1.02101	0.939523	1.01396	1.03526
GRMZM2G142437_P01	1.02101	0.939523	1.02101	0.986233
GRMZM2G147014_P01	1.02101	0.939523	0.840896	0.752623
GRMZM2G150648_P01	1.02101	0.939523	0.972655	1.04972
GRMZM2G173536_P01	1.02101	0.939523	0.846745	1.08673
GRMZM2G075551_P03	1.02811	0.939523	1.09429	1.10957
GRMZM2G120079_P01	1.03526	0.939523	1.04247	1.02811
GRMZM2G130398_P02	1.03526	0.939523	0.965936	0.952638
GRMZM2G452016_P02	1.03526	0.939523	0.946058	0.965936
GRMZM5G868273_P02	1.03526	0.939523	1.07923	0.946058
GRMZM2G035282_P01	1.04247	0.939523	0.972655	1.08673
GRMZM2G109842_P01	1.04247	0.939523	0.90125	1.07177
GRMZM2G147856_P02	1.04247	0.939523	1.06437	1.14076
GRMZM2G113205_P01	1.04972	0.939523	1.1487	0.858565
GRMZM2G367023_P01	1.04972	0.939523	1.04972	1.02101
GRMZM2G004468_P05	1.05702	0.939523	1.05702	0.97942
GRMZM2G025470_P01	1.05702	0.939523	1.10957	0.933033
GRMZM2G326111_P01	1.05702	0.939523	1.01396	1.01396
GRMZM2G016254_P02	1.06437	0.939523	1.01396	1.02101
GRMZM2G046186_P01	1.06437	0.939523	1.10191	1.01396
GRMZM2G067985_P05	1.06437	0.939523	0.952638	0.993092
GRMZM2G056773_P01	1.07177	0.939523	1.03526	1.06437
GRMZM2G174574_P02	1.07177	0.939523	0.913831	1.01396
GRMZM5G822237_P02	1.07177	0.939523	1.00696	0.926588
GRMZM2G055578_P03	1.07923	0.939523	1.13288	1.10191
GRMZM2G177263_P02	1.07923	0.939523	1.03526	1.03526
GRMZM2G016290_P04	1.08673	0.939523	1.15669	1.08673
GRMZM2G102230_P01	1.09429	0.939523	1.02811	0.959264
GRMZM2G048672_P01	1.10191	0.939523	1.04972	0.946058
GRMZM2G080930_P03	1.11729	0.939523	1.02101	1.14076
GRMZM2G058227_P01	1.13288	0.939523	1.02101	0.986233
GRMZM2G158045_P02	1.13288	0.939523	1.07177	1.04247
GRMZM2G170843_P02	1.13288	0.939523	0.965936	1.07177
GRMZM2G050450_P01	1.28343	0.939523	0.97942	0.907519
GRMZM2G094978_P01	0.817902	0.946058	0.876606	1.02101
GRMZM2G024389_P02	0.835088	0.946058	0.858565	0.835088
GRMZM2G069095_P01	0.835088	0.946058	0.920188	1.00696
GRMZM2G004298_P01	0.870551	0.946058	0.920188	1.10191
GRMZM2G023289_P01	0.876606	0.946058	0.876606	0.952638
GRMZM2G036007_P02	0.876606	0.946058	0.993092	1
GRMZM2G099045_P01	0.882703	0.946058	0.920188	1.00696
GRMZM2G150484_P01	0.882703	0.946058	0.965936	1.10957
GRMZM2G092214_P01	0.888843	0.946058	1.01396	0.965936
GRMZM2G003953_P02	0.888843	0.946058	0.795536	1.1487
GRMZM2G088138_P01	0.888843	0.946058	0.90125	0.920188
GRMZM2G116634_P02	0.888843	0.946058	0.97942	1.01396
GRMZM2G144273_P01	0.888843	0.946058	0.972655	1.02101
GRMZM2G058675_P02	0.90125	0.946058	0.846745	0.939523
GRMZM2G094599_P01	0.90125	0.946058	1.08673	0.952638
GRMZM2G109383_P01	0.90125	0.946058	0.864537	1.01396
GRMZM2G118597_P02	0.90125	0.946058	0.926588	1
GRMZM2G131489_P01	0.90125	0.946058	0.946058	0.952638
GRMZM2G134182_P01	0.90125	0.946058	0.926588	1.01396
GRMZM2G326707_P01	0.90125	0.946058	0.779165	1.04247
GRMZM2G044744_P01	0.907519	0.946058	0.946058	0.986233
GRMZM2G178775_P01	0.907519	0.946058	0.939523	1
GRMZM2G085254_P01	0.913831	0.946058	1.00696	0.993092
GRMZM5G851654_P01	0.913831	0.946058	1.02101	1.04972
GRMZM2G020523_P01	0.920188	0.946058	0.97942	0.97942
GRMZM2G037350_P02	0.920188	0.946058	1.02811	1.04972
GRMZM2G097286_P01	0.920188	0.946058	0.986233	1.10957
GRMZM2G104076_P01	0.920188	0.946058	0.858565	0.933033
GRMZM2G411668_P01	0.920188	0.946058	1.05702	1.00696
GRMZM2G057140_P01	0.926588	0.946058	0.959264	1
GRMZM2G058739_P01	0.926588	0.946058	1.02811	1.02811
GRMZM2G165917_P03	0.926588	0.946058	0.986233	1.02101
GRMZM2G003033_P01	0.933033	0.946058	0.959264	0.986233
GRMZM2G090469_P01	0.933033	0.946058	1	0.946058
GRMZM2G121565_P01	0.933033	0.946058	0.90125	1.00696
GRMZM2G448241_P02	0.933033	0.946058	0.920188	0.97942
GRMZM5G838196_P02	0.933033	0.946058	0.993092	1.03526
GRMZM2G048616_P01	0.939523	0.946058	0.882703	0.993092
GRMZM2G064159_P01	0.939523	0.946058	0.965936	1.03526
[truncated: 5,294 more rows]
