# Supplementary material for: Comparative Proteomics Combined with Morphophysiological Analysis Revealed Chilling Response Patterns in Two Contrasting Maize Genotypes
Source: Cells. 2022 Apr 13;11(8):1321. doi: 10.3390/cells11081321 (PMC9024610; doi:10.3390/cells11081321)
Supplement: Supplementary file 1 [file cells-11-01321-s001.zip › Table S6.xlsx]

## Sheet: first leaf KR701 res
Supplemental Table S6
The log2 (fold change) of KR701-responsive proteins at first leaf stage. Each sample had three replicates.
Accession Number	first leaf stage
	KR701-log2FC-(-)-rep1	KR701-log2FC-(-)-rep2	KR701-log2FC-(-)-rep3	KR701-log2FC-(+)-rep1	KR701-log2FC-(+)-rep2	KR701-log2FC-(+)-rep3
AC209898.2_FGP004	0.269273	-0.128314	-0.0659742	-1.11435	-0.71762	-0.780165
GRMZM2G014695_P01	-0.0304719	-0.0185857	0.0535284	-1.07826	-1.08927	-1.16133
GRMZM2G075502_P01	0.000576963	-0.0502036	0.0325241	-1.07461	-1.02738	-1.11029
GRMZM2G070011_P01	0.064469	0.125387	-0.133052	-0.848141	-0.911587	-0.649729
GRMZM2G103668_P01	-0.0451337	0.0136409	0.0197731	-0.761213	-0.820107	-0.828793
GRMZM2G139643_P01	-0.00129901	0.0233263	-0.00795672	-0.717382	-0.742748	-0.714539
GRMZM2G091456_P01	0.250719	-0.182459	0.00834346	-0.711701	-0.278934	-0.471329
GRMZM5G855347_P02	0.0211954	-0.0397849	0.0210533	-0.70557	-0.647241	-0.705806
GRMZM2G168552_P01	-0.026352	-0.0081018	0.0567222	-0.658811	-0.677149	-0.738168
GRMZM2G104481_P01	-0.0670318	-0.00882739	0.0640551	-0.655399	-0.713829	-0.786622
GRMZM2G086763_P01	0.0359054	-0.0368218	0.0132121	-0.651768	-0.581432	-0.631511
GRMZM2G101117_P01	0.0434845	-0.102217	0.225028	-0.624822	-0.480357	-0.806417
GRMZM2G175401_P01	0.0024505	-0.0191704	0.0297002	-0.608232	-0.586623	-0.63554
GRMZM5G874448_P01	0.0299829	0.00187429	-0.0411202	-0.595969	-0.56811	-0.527616
GRMZM2G337242_P01	0.0856966	-0.0420111	-0.0430512	-0.59379	-0.466138	-0.467533
GRMZM2G178645_P01	-0.0505024	-0.0338649	0.0615688	-0.592049	-0.611535	-0.706983
GRMZM2G069911_P01	-0.0325362	-0.000144277	0.0603241	-0.57906	-0.613741	-0.673003
GRMZM2G134846_P01	-0.115441	0.0472592	0.0374525	-0.572394	-0.735043	-0.726424
GRMZM2G174984_P01	-0.0101344	-0.0423082	0.045443	-0.55131	-0.525123	-0.606694
GRMZM2G167356_P02	0.0392788	0.015783	-0.080393	-0.534705	-0.511279	-0.415037
GRMZM5G801949_P02	0.132643	-0.123277	0.0731347	-0.525123	-0.272123	-0.465142
GRMZM2G014902_P01	-0.107803	0.00360224	0.125783	-0.521391	-0.637783	-0.75877
GRMZM2G394500_P01	-0.0222438	0.0500489	-0.0275279	-0.520149	-0.596187	-0.518494
GRMZM2G010349_P02	-0.00549268	0.00619029	-0.017125	-0.514367	-0.525953	-0.502873
GRMZM2G070167_P01	0.0192037	0.00417776	-0.0234164	-0.511074	-0.498994	-0.468531
GRMZM2G130053_P01	-0.0223904	0.00776959	0.0163537	-0.507378	-0.534496	-0.546035
GRMZM2G139300_P01	-0.0185857	-0.0165412	0.0258793	-0.503487	-0.50226	-0.547932
GRMZM2G133434_P01	0.00920383	0.0723116	-0.0667295	-0.502056	-0.569822	-0.430703
GRMZM2G337113_P02	-0.000432873	-0.0241497	-0.0204868	-0.495329	-0.463549	-0.475334
GRMZM2G094990_P01	-0.013043	0.0156403	0.0142124	-0.492687	-0.521391	-0.519942
GRMZM2G079759_P01	-0.0210722	-0.0487106	0.0742314	-0.490659	-0.462952	-0.585973
GRMZM6G397851_P01	0.0229004	0.0017302	-0.0270868	-0.483985	-0.460568	-0.434013
AC197758.3_FGP004	0.0241778	-0.00259919	-0.0443896	-0.474933	-0.450676	-0.408895
GRMZM2G059129_P01	0.108625	-0.0139168	-0.0166871	-0.470329	-0.34795	-0.342817
GRMZM2G112337_P02	0.0299829	-0.0291463	0.00028851	-0.46953	-0.410237	-0.436354
GRMZM2G059191_P01	-0.0301772	0.00446544	0.0207689	-0.467932	-0.507173	-0.523463
GRMZM2G137648_P01	0.049352	-0.046772	-0.0169791	-0.463151	-0.366987	-0.396878
GRMZM2G114588_P01	0.00374614	0.0102069	-0.0250302	-0.460171	-0.463748	-0.428178
GRMZM2G038973_P01	0.0695647	-0.0232698	-0.036082	-0.456207	-0.365871	-0.3531
GRMZM2G057186_P01	-0.01552	0.0220482	-0.0187318	-0.454625	-0.493297	-0.452649
GRMZM2G329047_P01	-0.231752	0.0806577	0.16954	-0.449493	-0.765376	-0.851782
GRMZM5G856777_P01	-0.021365	-0.0206331	0.0234683	-0.447918	-0.448509	-0.492687
GRMZM2G003762_P03	-0.0797829	0.0473988	0.016211	-0.447721	-0.57497	-0.54372
GRMZM2G175989_P01	-0.0229766	0.045443	-0.0665784	-0.445951	-0.514161	-0.405069
GRMZM2G126261_P01	0.000576963	0.0124972	-0.00462403	-0.44183	-0.453834	-0.436549
GRMZM2G361064_P01	0.0094905	0.0220482	-0.0216579	-0.441243	-0.454822	-0.411004
GRMZM2G122853_P01	0.0535284	-0.0215115	0.0464212	-0.441047	-0.363457	-0.434013
GRMZM2G377855_P01	-0.00433459	0.00230647	0.0186342	-0.434793	-0.441438	-0.454032
GRMZM5G875238_P01	-0.0123153	0.00273852	0.00619029	-0.434013	-0.453044	-0.456603
GRMZM2G087918_P01	0.0143553	-0.0326838	0.00920383	-0.433818	-0.3893	-0.42876
GRMZM5G805485_P01	-0.0257644	0.0467006	-0.00520307	-0.425075	-0.497975	-0.445755
GRMZM2G025882_P01	-0.00332202	-0.0344558	0.0282862	-0.424688	-0.393653	-0.453439
GRMZM2G147279_P01	-0.0123153	0.0209111	0.00273852	-0.411771	-0.446148	-0.428178
GRMZM2G306732_P01	-0.0144996	-0.02283	0.0377336	-0.407555	-0.394032	-0.459576
GRMZM2G024391_P01	-0.026352	0.0503276	-0.0316512	-0.404878	-0.47915	-0.397068
GRMZM2G064096_P01	-0.0326838	0.0166389	0.0117819	-0.401254	-0.455218	-0.446148
GRMZM2G071450_P01	-0.0182934	0.00561557	-0.0158117	-0.398399	-0.422366	-0.395359
GRMZM2G016622_P02	-0.126738	0.0622599	0.0440443	-0.398018	-0.587056	-0.565332
GRMZM5G845611_P01	0.00216242	-0.0234164	0.0247452	-0.39138	-0.365871	-0.402207
GRMZM2G018716_P01	-0.0232698	-0.167799	0.0955869	-0.390623	-0.244856	-0.50943
GRMZM2G320399_P01	-0.0257644	0.122341	-0.0897278	-0.383454	-0.533034	-0.321027
AC231745.1_FGP003	-0.011588	-0.00940813	0.0139267	-0.383266	-0.389111	-0.409087
GRMZM2G148090_P02	-0.0114425	-0.0628063	0.0936954	-0.376695	-0.327892	-0.481767
GRMZM2G047592_P02	-0.0409718	-0.00737657	0.0489336	-0.375759	-0.409278	-0.46913
GRMZM2G102737_P01	-0.0344558	-0.0144996	0.101785	-0.375197	-0.397828	-0.510868
GRMZM2G175562_P02	-0.0515487	0.0130692	0.0329472	-0.37501	-0.439481	-0.459378
GRMZM2G081583_P02	-0.017271	0.015783	-0.000288568	-0.373888	-0.403733	-0.391002
GRMZM2G009025_P01	0.00705194	-0.0403782	0.0350608	-0.37314	-0.324816	-0.400301
GRMZM2G038281_P02	-0.0162494	0.0146409	-0.00563751	-0.367732	-0.396119	-0.375946
GRMZM2G170400_P01	-0.0168331	-0.00129901	0.0136409	-0.365314	-0.377632	-0.392516
GRMZM2G034302_P01	-0.0313562	-0.00708658	0.0432045	-0.362529	-0.386846	-0.434013
GRMZM2G090595_P01	-0.151202	0.0497702	0.0659858	-0.355313	-0.555333	-0.571322
GRMZM2G026980_P01	-0.0289991	0.0378742	-0.0131886	-0.347399	-0.418311	-0.366987
GRMZM2G161306_P01	-0.0513992	0.018919	0.03492	-0.336063	-0.406407	-0.41677
GRMZM2G120587_P01	-0.0968074	0.0255958	0.0835197	-0.32572	-0.45107	-0.509019
GRMZM2G017419_P01	-0.0733933	0.0640551	-0.00491352	-0.320126	-0.457593	-0.385903
GRMZM2G353276_P01	-0.0858948	0.0332292	0.0708015	-0.314912	-0.431676	-0.470529
GRMZM2G100747_P01	-0.0954196	0.0306892	0.185486	-0.284897	-0.408512	-0.562772
GRMZM2G073861_P03	-0.247765	-0.017125	0.106482	-0.178371	-0.407938	-0.532825
GRMZM2G403007_P01	0.269512	-0.0476664	-0.0817664	0.152378	0.468427	0.503756
GRMZM2G465169_P02	0.218595	-0.0764324	-0.0312088	0.258097	0.552967	0.509138
AC205703.4_FGP006	0.138945	0.000576963	-0.140826	0.265077	0.401084	0.544881
GRMZM2G110233_P01	0.0828388	-0.017125	-0.147202	0.302407	0.402395	0.533563
GRMZM2G115245_P01	0.0776532	0.031254	-0.0696033	0.323082	0.369494	0.47176
GRMZM2G157384_P01	0.0585243	-0.0216579	-0.0591943	0.323543	0.403813	0.443819
GRMZM2G021567_P01	0.0745054	0.0985543	-0.103302	0.325271	0.301236	0.502127
GRMZM2G134176_P01	0.0469799	0.00748258	-0.0522964	0.326537	0.366028	0.428357
GRMZM2G137961_P01	0.0742314	-0.109981	-0.0911103	0.331017	0.51339	0.496104
GRMZM2G134230_P01	0.0210533	0.0432045	-0.125951	0.338339	0.31904	0.485221
GRMZM2G042639_P04	0.0483757	-0.0472192	-0.0181473	0.3421	0.437973	0.408929
GRMZM2G059039_P01	0.0415234	-0.0238564	-0.0515487	0.342441	0.410558	0.435415
GRMZM2G098212_P01	0.0368901	-0.0429026	0.0292762	0.347325	0.430285	0.35727
GRMZM2G009464_P01	0.0581086	-0.0081018	-0.0581425	0.350497	0.416624	0.467175
GRMZM2G003853_P01	0.0234683	-0.017125	0.00389003	0.352081	0.391548	0.373063
GRMZM2G147849_P01	0.0261627	-0.0133342	-0.00563751	0.353775	0.393197	0.385486
GRMZM2G165815_P02	0.0250288	-0.046921	-0.00534787	0.354114	0.423417	0.382944
GRMZM2G308687_P01	0.0419438	-0.0128975	-0.03934	0.354678	0.409472	0.435949
GRMZM2G002786_P01	0.0381552	-0.0310614	-0.0216579	0.358846	0.428357	0.416299
GRMZM2G123624_P01	0.124196	-0.0860479	-0.0591943	0.358959	0.566961	0.542506
GRMZM2G344634_P01	0.0257376	0.031254	-0.119667	0.359634	0.356369	0.504976
GRMZM2G044629_P01	0.0635029	-0.0591943	-0.0418626	0.361656	0.484499	0.46999
GRMZM2G096962_P02	0.0292762	-0.00940813	-0.0207795	0.362105	0.400866	0.412185
GRMZM5G825854_P01	0.0255958	-0.0359341	0.0241778	0.363339	0.424922	0.414569
GRMZM2G031545_P02	0.0221902	0.0176369	-0.0397849	0.36446	0.365357	0.422771
GRMZM2G097021_P01	0.147697	-0.166827	-0.077041	0.3667	0.682214	0.592445
GRMZM2G126580_P01	0.0381552	-0.0400815	-0.0226834	0.369383	0.447738	0.428035
GRMZM2G053397_P01	0.00389003	0.0149265	-0.024003	0.369941	0.358846	0.399554
GRMZM2G081144_P01	0.0425043	0.00230647	-0.0400815	0.370499	0.40806	0.452912
GRMZM2G005980_P01	0.00504062	-0.0528949	0.0244615	0.371169	0.431676	0.351741
GRMZM2G078933_P01	0.00776959	-0.00868224	-0.0120243	0.372841	0.386811	0.391328
GRMZM2G131943_P03	0.00805655	0.00475306	-0.000432873	0.374511	0.377735	0.383165
GRMZM2G004699_P01	0.00317044	0.0137838	-0.0207795	0.377624	0.367259	0.398679
AC203985.4_FGP005	0.00504062	0.118891	-0.147681	0.378179	0.261952	0.528471
GRMZM2G000326_P02	0.0169241	-0.0365259	0.0423642	0.379066	0.43189	0.350837
GRMZM2G159250_P01	0.0297002	0.0475384	-0.0676364	0.380619	0.365581	0.477885
GRMZM2G098239_P01	0.0103502	0.0203422	-0.0385989	0.380951	0.370945	0.429857
GRMZM2G445057_P03	0.0196308	-0.0218044	0.0142124	0.381062	0.422341	0.383718
GRMZM5G884242_P04	-0.00592721	-0.000432873	-0.00245467	0.382501	0.379399	0.378955
GRMZM2G001514_P01	0.0353424	-0.00897255	-0.0304719	0.383608	0.430178	0.449324
GRMZM2G019251_P02	0.0193461	-0.0137711	0.00158609	0.384271	0.417488	0.402067
GRMZM2G157018_P01	0.00446544	0.0398403	-0.0369699	0.385707	0.350384	0.427177
GRMZM2G109967_P02	0.00977712	-0.128156	0.0353424	0.385707	0.524666	0.360083
GRMZM2G107872_P02	0.0137838	-0.00882739	-0.0424568	0.385707	0.410124	0.443288
GRMZM2G010801_P02	0.018919	-0.0652193	0.0166389	0.385818	0.467697	0.388134
GRMZM2G408768_P01	0.0322419	-0.094341	0.0690147	0.385818	0.515511	0.349026
GRMZM2G140342_P01	0.0223323	0.0123541	-0.0717244	0.386038	0.39605	0.482952
GRMZM2G014750_P01	0.081476	-0.109359	0.00288251	0.387804	0.575603	0.463309
GRMZM2G149281_P01	0.0183493	0.0107798	-0.0288519	0.388134	0.392537	0.432104
GRMZM2G452633_P01	0.00100953	-0.00245467	0.000865357	0.388355	0.391768	0.388465
GRMZM2G157729_P01	0.00345832	0.0753273	-0.0644648	0.388465	0.316377	0.45607
GRMZM2G361569_P01	0.0464212	-0.0325362	-0.0502036	0.389457	0.468427	0.488721
GRMZM2G006006_P01	0.0250288	0.0117819	-0.0682413	0.392207	0.407951	0.48656
GRMZM2G014076_P01	0.00690837	-0.0436459	0.0354832	0.393416	0.444031	0.364909
GRMZM2G171484_P01	-0.000721528	0.0740944	-0.0505024	0.395282	0.318346	0.445409
GRMZM2G119773_P01	0.0123541	-0.0102797	-0.00404521	0.395282	0.417812	0.411643
GRMZM2G072911_P01	0.0137838	-0.0207795	0.00920383	0.395282	0.429643	0.399663
GRMZM2G110726_P01	0.0292762	-0.113723	0.117296	0.396269	0.539233	0.309409
GRMZM2G108087_P01	-0.00144342	0.0311128	-0.0638615	0.396488	0.3639	0.457647
GRMZM2G079196_P01	-0.0111517	0.00374614	0.015783	0.396598	0.378623	0.368936
GRMZM2G152466_P01	0.0448837	-0.0247367	-0.0307666	0.396927	0.466549	0.472592
GRMZM2G177812_P01	-0.0146453	0.0190614	0.00532812	0.397036	0.363339	0.376957
GRMZM2G035477_P01	0.00848689	0.0236102	-0.040675	0.39835	0.385707	0.447526
GRMZM2G054136_P09	0.0113525	-0.013043	0.00129784	0.399445	0.423847	0.409364
GRMZM2G112524_P02	0.0342157	-0.0118789	-0.0199016	0.400429	0.443819	0.451857
GRMZM2G102183_P02	0.0504669	-0.0543923	0.0254541	0.401303	0.503654	0.426426
GRMZM2G445602_P01	-0.00650678	0.0154976	-0.0111517	0.401958	0.379954	0.406646
GRMZM2G093405_P06	-0.0105703	-0.010861	0.0364682	0.402176	0.40021	0.352984
GRMZM2G063756_P01	0.00144197	-0.00303285	0.00920383	0.402176	0.403595	0.391328
GRMZM2G112488_P01	0.0332292	0.0309716	-0.0513992	0.402504	0.404794	0.490057
GRMZM2G063340_P04	0.0166389	0.0374525	-0.0528949	0.404794	0.381173	0.471448
GRMZM2G128564_P01	0.0418037	0.00934717	-0.0312088	0.408168	0.440314	0.478092
GRMZM2G304362_P01	0.0272956	-0.0162494	-0.0111517	0.408603	0.455334	0.446997
GRMZM2G121683_P01	0.0284277	-0.0220973	0.00705194	0.409147	0.459746	0.433173
GRMZM2G094595_P03	0.00848689	-0.106249	0.0291348	0.409472	0.52316	0.38659
GRMZM2G121456_P01	0.000721167	0.0114956	-0.00984383	0.410341	0.399554	0.42094
GRMZM2G028986_P01	0.0265876	0.0176369	-0.0723311	0.410992	0.422879	0.512783
GRMZM2G334899_P01	-0.00245467	0.0194884	-0.0245899	0.411101	0.388575	0.430285
GRMZM2G430600_P02	0.0246034	-0.0421597	0.0143553	0.411969	0.478713	0.422341
GRMZM2G132461_P02	0.0497702	-0.0470701	-0.010425	0.411969	0.505688	0.47176
GRMZM2G026147_P03	-0.0144996	0.0040339	0.00532812	0.412402	0.392757	0.392427
GRMZM2G071360_P01	-0.0216579	-0.0551416	0.0295589	0.412727	0.44615	0.362891
GRMZM6G639283_P01	-0.00274373	-0.00737657	0.00848689	0.413702	0.421048	0.405121
GRMZM2G042008_P01	0.0017302	0.0183493	-0.0451337	0.414893	0.400538	0.464355
GRMZM2G047093_P01	-0.0348991	0.00489684	0.0216219	0.417164	0.373509	0.356707
GRMZM5G876285_P02	-0.0140625	-0.0357862	0.0373119	0.417704	0.439357	0.369271
GRMZM2G105712_P06	0.0224743	0.0149265	-0.0303245	0.418244	0.425782	0.473527
GRMZM2G110023_P01	-0.0423082	0.0425043	-0.0231232	0.418352	0.336055	0.401958
GRMZM2G004768_P01	0.0241778	0.0298416	-0.104232	0.418676	0.41511	0.546956
GRMZM2G011219_P01	0.0270125	-0.0418626	0.0139267	0.418784	0.487692	0.434882
GRMZM2G094051_P03	-0.0320936	0.0214797	0.0234683	0.421587	0.365916	0.366364
GRMZM2G051677_P01	0.00647756	0.000865357	0.0237521	0.421802	0.427392	0.404467
GRMZM2G159369_P01	0.026446	-0.0231232	-0.00101024	0.422986	0.472592	0.450485
GRMZM2G124317_P01	0.0499095	0.0071955	-0.0371179	0.422986	0.461948	0.506196
AC155610.2_FGP007	0.137504	-0.0667295	0.00820001	0.422986	0.624148	0.549324
GRMZM2G054123_P04	0.0163537	-0.017271	0.00158609	0.423094	0.454071	0.437867
GRMZM2G110567_P01	-0.000865877	-0.00245467	0.00460925	0.423417	0.42503	0.417812
GRMZM2G060947_P01	-0.0297353	0.0713508	-0.0178552	0.42503	0.326882	0.415542
GRMZM2G136513_P01	-0.0260582	-0.0044793	0.0472592	0.42503	0.403377	0.351628
GRMZM2G075839_P01	-0.00752159	-0.00911773	0.0375931	0.425352	0.429321	0.381283
GRMZM2G134862_P01	-0.0260582	-0.0147911	0.0381552	0.426426	0.417488	0.364909
GRMZM2G024099_P01	0.0114956	0.00331439	-0.0099891	0.426855	0.434988	0.45386
GRMZM2G144387_P03	-0.0256175	-0.03623	0.0494914	0.427713	0.438293	0.355129
GRMZM2G155111_P01	-0.0306192	-0.00346663	0.0329472	0.427928	0.403704	0.36446
GRMZM2G128080_P02	0.0223323	-0.00549268	-0.0143539	0.428142	0.458172	0.464982
GRMZM2G162688_P01	0.00345832	0.0309716	-0.0257644	0.429107	0.39846	0.455123
GRMZM2G141707_P01	-0.0405266	0.0380147	-0.0081018	0.429536	0.348346	0.394404
GRMZM2G047486_P01	-0.0440921	-0.0295881	0.0604625	0.429857	0.415326	0.327687
GRMZM2G023242_P04	0.0304067	-0.100051	0.0575542	0.429857	0.561302	0.405992
GRMZM2G445958_P01	0.0244615	-0.0216579	0.00446544	0.431356	0.47747	0.453544
GRMZM2G063850_P01	-0.0156659	-0.0150826	0.0247452	0.431783	0.427928	0.388024
GRMZM2G168898_P01	0.0024505	-0.0424568	0.0343566	0.432959	0.474462	0.400101
GRMZM2G178807_P01	-0.00274373	-0.0390435	0.0359054	0.4336	0.467175	0.393306
GRMZM2G439201_P02	0.00748258	0.0112094	-0.0165412	0.434028	0.430392	0.458067
GRMZM6G617209_P01	0.00561557	0.00432161	-0.00101024	0.435095	0.436375	0.441802
GRMZM2G150697_P01	0.0100637	0.0163537	-0.0458782	0.435415	0.431463	0.492315
AC217499.3_FGP003	-0.0124608	0.010923	0.000432744	0.436055	0.41045	0.420833
GRMZM2G117707_P02	0.00317044	-0.0712696	0.0571383	0.437547	0.512176	0.383608
GRMZM2G136680_P01	-0.0248835	0.0318186	-0.0237097	0.439357	0.383055	0.437015
GRMZM2G060561_P02	-0.0658232	0.016211	0.0328061	0.439676	0.357608	0.340961
GRMZM2G115615_P01	0.00906047	0.0164963	-0.027675	0.441271	0.433707	0.4755
GRMZM2G017957_P02	0.0567222	0.0160684	-0.0671829	0.441377	0.482022	0.565305
GRMZM6G007923_P01	-0.0165412	0.0194884	0.00460925	0.444879	0.406428	0.421264
GRMZM5G868433_P01	0.0378742	-0.074912	0.041243	0.445197	0.557974	0.444137
GRMZM2G128171_P03	0.00547185	0.0233263	-0.0163953	0.445303	0.427499	0.467175
GRMZM2G091481_P01	0.00604663	0.00977712	-0.0140625	0.44668	0.439995	0.463832
GRMZM2G077596_P01	-0.070815	0.0889557	-0.0162494	0.447209	0.287472	0.392647
GRMZM2G093272_P01	0.0391384	-0.0396366	-0.00984383	0.448267	0.524465	0.494672
GRMZM2G059449_P01	-0.0297353	0.103934	-0.114816	0.448584	0.312433	0.532467
GRMZM5G864424_P01	0.0486547	-0.0128975	-0.0126064	0.45133	0.513086	0.512682
GRMZM2G324886_P01	-0.00592721	0.0536674	-0.0536434	0.451435	0.389787	0.497025
GRMZM2G171588_P01	0.0116388	-0.000144277	-0.00955335	0.451541	0.466966	0.472696
GRMZM2G396540_P01	0.0583858	-0.0727862	-0.017271	0.453228	0.582941	0.527471
GRMZM2G103197_P01	0.00633393	0.00460925	-0.0124608	0.453333	0.455018	0.472072
GRMZM2G033653_P01	-0.0287048	0.0357647	-0.0332742	0.453755	0.389347	0.458487
GRMZM5G807767_P03	-0.0215115	0.0183493	0.00920383	0.453965	0.410667	0.419862
GRMZM2G152417_P01	0.0698396	-0.0323887	0.000576963	0.454281	0.555522	0.522558
GRMZM2G075655_P01	-0.00491352	0.0071955	0.00575927	0.454702	0.442652	0.444031
GRMZM2G306104_P01	-0.00708658	-0.0368218	0.026021	0.455018	0.487383	0.424062
GRMZM2G171452_P01	0.0139267	-0.0587434	0.0536674	0.455018	0.529971	0.418028
GRMZM2G174906_P02	0.0071955	-0.088807	0.047678	0.455334	0.554245	0.414785
GRMZM2G365160_P01	-0.0222438	0.0220482	0.00963382	0.456701	0.412511	0.421587
GRMZM2G127648_P01	0.0268709	-0.0343081	0.00288251	0.457437	0.518434	0.483571
GRMZM2G165944_P01	-0.0566412	0.023894	0.0297002	0.458067	0.375067	0.369159
GRMZM2G155329_P01	0.0142124	0.00273852	-0.00650678	0.459641	0.471135	0.483158
GRMZM2G165966_P01	-0.0697547	0.0501882	-0.0519973	0.46048	0.343351	0.442652
GRMZM2G166767_P02	-0.00259919	-0.000144277	0.00302648	0.46069	0.455334	0.454913
GRMZM2G071089_P01	-0.0121698	0.000721167	0.0187766	0.462157	0.449324	0.434562
GRMZM2G071518_P01	0.00877371	-0.000865877	-0.0150826	0.462157	0.470823	0.487486
GRMZM2G158205_P01	0.0226164	0.0167816	-0.0383026	0.462471	0.468218	0.523462
GRMZM2G157564_P02	-0.0350469	0.00187429	0.0698396	0.464041	0.424385	0.356369
GRMZM2G119705_P01	0.0381552	-0.0234164	-0.0120243	0.465295	0.52687	0.515511
GRMZM2G042502_P01	0.0147838	-0.0169791	-0.00317743	0.465922	0.497331	0.480575
GRMZM2G102903_P02	-0.0229766	0.0201999	0.0357647	0.467593	0.422986	0.407407
GRMZM2G101875_P01	0.032383	-0.0133342	-0.0161035	0.469261	0.518132	0.517729
GRMZM2G084149_P01	-0.0137711	0.0490731	-0.0430512	0.470094	0.404685	0.49682
AC215244.3_FGP002	-0.0377101	-0.0110064	0.0448837	0.471135	0.441377	0.385486
GRMZM2G180399_P01	0.0183493	-0.0609992	0.0291348	0.473215	0.550408	0.460376
GRMZM2G140545_P01	0.0304067	0.00676478	-0.0385989	0.473839	0.497434	0.546956
GRMZM2G089836_P01	-0.00303285	-0.0429026	0.0503276	0.474047	0.513895	0.420725
GRMZM2G139874_P01	-0.0289991	0.0370307	-0.0147911	0.47415	0.408168	0.463099
GRMZM2G017269_P01	-0.0399332	0.0357647	0.00906047	0.474254	0.396817	0.422556
GRMZM2G137352_P01	-0.0676364	0.0866479	0.0284277	0.474462	0.318809	0.377179
GRMZM5G807835_P01	-0.0250302	0.0574156	-0.0452826	0.475396	0.393087	0.498659
GRMZM2G043336_P01	0.000144262	-0.0585932	0.0588014	0.475707	0.536849	0.417164
GRMZM2G011523_P01	0.0103502	-0.0502036	0.0402612	0.477263	0.537843	0.447315
GRMZM2G157296_P01	0.0475384	0.00776959	-0.0424568	0.477677	0.517528	0.567643
GRMZM5G866082_P02	0.0816123	-0.114348	-0.00955335	0.478402	0.67437	0.569588
GRMZM2G043737_P01	-0.00752159	0.0210533	-0.0136255	0.479851	0.451224	0.488618
GRMZM2G098496_P02	0.0180644	-0.0212186	0.00590296	0.480472	0.519743	0.492622
GRMZM2G059965_P01	0.00805655	-0.0231232	0.00877371	0.481506	0.511367	0.479438
GRMZM2G096475_P01	0.0444641	0.00345832	-0.0485614	0.482848	0.526169	0.575893
GRMZM2G124963_P01	-0.00621696	-0.00795672	0.018919	0.483674	0.482229	0.455439
GRMZM2G058057_P01	-0.053344	-0.00520307	0.0371713	0.485324	0.437867	0.395611
GRMZM2G134806_P01	0.0177794	0.00028851	-0.00129901	0.486869	0.504264	0.509544
GRMZM2G134398_P02	0.00302648	0.0691522	-0.0351948	0.487795	0.421695	0.528371
GRMZM2G070716_P02	-0.0117334	0.0183493	0.00288251	0.488206	0.455965	0.474358
GRMZM2G039089_P03	-0.0366739	0.00460925	0.00633393	0.489646	0.448478	0.449218
GRMZM2G178341_P01	0.0301242	0.00345832	-0.0332742	0.490159	0.514097	0.550802
GRMZM2G026371_P01	-0.00853711	-0.018878	0.0240359	0.491699	0.50518	0.459117
GRMZM2G702426_P01	-0.00868224	-0.00288828	0.00863031	0.491904	0.488515	0.474566
GRMZM2G439950_P02	-0.101908	-0.0131886	0.0690147	0.493545	0.407407	0.32262
GRMZM5G850455_P02	0.0194884	0.0469799	-0.0434972	0.495183	0.469365	0.557091
GRMZM2G116427_P01	-0.0137711	0.0113525	0.012068	0.495388	0.46874	0.468635
GRMZM2G044027_P02	0.0668125	0.0594937	-0.125006	0.49774	0.502025	0.690104
GRMZM2G043291_P02	-0.00781166	0.00834346	0.00302648	0.498864	0.485839	0.488104
GRMZM2G070863_P01	-0.0455803	0.000721167	0.0237521	0.500598	0.454281	0.431142
GRMZM2G149422_P01	0.021764	0.0668125	-0.105939	0.5007	0.456806	0.629566
GRMZM5G826979_P01	-0.0721794	0.0163537	0.0325241	0.502331	0.411101	0.398241
GRMZM2G010868_P01	0.0257376	-0.000721528	-0.0140625	0.50284	0.527271	0.536948
GRMZM2G143627_P02	-0.0102797	-0.0117334	0.0184917	0.504468	0.505891	0.475707
GRMZM2G173128_P01	0.0409625	0.00590296	-0.0644648	0.504468	0.539432	0.610133
GRMZM2G021794_P01	0.101112	-0.0328314	-0.111851	0.506196	0.639603	0.717649
GRMZM2G049269_P01	-0.00101024	-0.00723157	0.00345832	0.506297	0.512682	0.501821
GRMZM2G123714_P01	-0.064314	-0.00216567	0.0405418	0.507516	0.44297	0.40021
GRMZM2G034848_P01	-0.0168331	-0.0187318	0.0622599	0.507719	0.511772	0.427499
GRMZM2G330635_P01	-0.0353426	-0.00115462	0.0241778	0.508023	0.473943	0.445621
GRMZM2G100225_P01	-0.00332202	-0.0197553	0.0200577	0.508226	0.521955	0.484705
GRMZM2G009479_P01	-0.0366739	0.00115369	0.0207689	0.50853	0.468114	0.448478
GRMZM2G016836_P01	-0.0403782	0.0977456	-0.0575418	0.509138	0.368154	0.526169
GRMZM2G024159_P02	-0.046474	0.224411	-0.0963447	0.509949	0.237564	0.558268
GRMZM2G350319_P02	-0.0334219	0.0603241	-0.0134798	0.511164	0.418568	0.493647
GRMZM2G438551_P02	-0.0270868	0.0515809	-0.00984383	0.513289	0.431676	0.4959
GRMZM2G032315_P01	0.00920383	-0.0121698	0.000144262	0.514198	0.538041	0.52697
GRMZM2G325575_P01	0.0371713	-0.0951113	0.0529723	0.514198	0.64284	0.494774
GRMZM2G005493_P01	0.016211	0.0406821	-0.0405266	0.514299	0.492622	0.573471
GRMZM2G156632_P01	0.0246034	0.0458623	-0.0454314	0.514804	0.493442	0.584482
GRMZM2G119219_P03	-0.0557412	0.000721167	0.0399806	0.516519	0.460061	0.423309
GRMZM2G371375_P01	-0.0764324	0.128821	-0.0134798	0.516822	0.308943	0.453439
GRMZM2G452523_P01	-0.0394883	0.00345832	0.1129	0.518031	0.472384	0.363003
AC199526.5_FGP002	-0.0353426	0.0651587	-0.01552	0.518031	0.414677	0.497638
GRMZM2G450498_P01	0.0333701	-0.0169791	-0.00752159	0.518334	0.571725	0.56179
GRMZM2G042683_P01	-0.0484122	0.00532812	0.0423642	0.518535	0.464773	0.427713
GRMZM2G028929_P02	0	0.0240359	-0.0279691	0.518636	0.490981	0.542902
GRMZM2G163641_P01	0.0163537	-0.00752159	-0.027675	0.518737	0.543595	0.563841
GRMZM2G181542_P01	0.0240359	-0.0285576	0.00158609	0.519743	0.573568	0.543298
GRMZM2G301908_P01	-0.0972704	0.0866479	0.460061	0.523863	0.342441	-0.0320936
GRMZM2G005938_P01	0.00446544	0.0571383	-0.0312088	0.524164	0.474047	0.562963
GRMZM2G146246_P02	0.000865357	-0.00375589	0.00230647	0.524365	0.526069	0.519944
GRMZM2G089713_P07	0.00547185	-0.000577193	-0.00361125	0.525868	0.531868	0.53834
GRMZM2G397759_P01	-0.0928017	-0.00578235	0.0880059	0.52717	0.442545	0.346305
GRMZM2G382673_P01	0.00834346	0.0236102	-0.0415656	0.527471	0.515006	0.577441
GRMZM2G443495_P05	-0.138918	0.00776959	0.107286	0.532566	0.384713	0.286408
GRMZM2G016890_P01	0.00100953	0.0167816	-0.0099891	0.543991	0.528271	0.555031
GRMZM5G856966_P01	-0.0118789	0.0455828	-0.0220973	0.55031	0.490262	0.560715
GRMZM2G408305_P02	-0.0957279	0.0415234	0.00805655	0.551885	0.41446	0.448055
GRMZM2G360021_P01	0.0429244	-0.0200478	-0.03934	0.555227	0.624054	0.637378
GRMZM2G114642_P01	-0.0442408	0.0817487	-0.0166871	0.556503	0.430499	0.528971
GRMZM2G107839_P01	-0.0237097	0.013498	-0.0099891	0.559051	0.521754	0.545277
GRMZM2G115766_P01	0.134747	-0.0110064	-0.0865074	0.559149	0.706022	0.780478
GRMZM2G138527_P01	0.00891709	0.055751	-0.0357862	0.559932	0.512379	0.604071
GRMZM2G447632_P01	0.0209111	0.0126402	-0.0316512	0.561693	0.56988	0.616546
GRMZM2G145175_P02	-0.0977334	0.0780633	-0.018878	0.56306	0.384823	0.482745
GRMZM2G051943_P01	0	0.0387171	-0.0338649	0.56306	0.52085	0.593497
GRMZM2G320521_P01	-0.0656722	0.0850167	-0.00505829	0.563549	0.411209	0.50121
GRMZM2G053669_P01	0.0822938	-0.037562	-0.032979	0.566572	0.690372	0.681854
GRMZM5G803318_P03	-0.10827	0.11929	-0.00303285	0.568421	0.340847	0.465295
GRMZM2G062396_P01	-0.0150826	0.0805212	-0.0972704	0.571725	0.473215	0.656359
AC197246.3_FGP001	-0.0289991	0.0846086	-0.042754	0.573278	0.459641	0.586981
GRMZM2G167549_P03	-0.0304719	0.0409625	0.0154976	0.57599	0.505688	0.531169
GRMZM5G868062_P04	-0.017271	-0.0506518	0.105276	0.578214	0.610039	0.454071
GRMZM5G868757_P04	-0.161331	0.00201836	0.0648829	0.57947	0.417596	0.354452
GRMZM2G348909_P01	-0.0778022	0.075738	-0.023563	0.579856	0.429107	0.528571
GRMZM2G102356_P01	-0.027822	0.0803848	-0.0279691	0.581881	0.473735	0.582074
GRMZM2G101446_P01	0.00547185	-0.0281162	0.0398403	0.582074	0.615699	0.547746
GRMZM2G050501_P01	-0.166503	0.0430645	0.0210533	0.586116	0.375623	0.398679
GRMZM2G139123_P01	-0.00795672	0.0163537	-0.00578235	0.590051	0.562768	0.584866
GRMZM2G153823_P01	-0.0165412	-0.0200478	0.0318186	0.590722	0.596935	0.54587
GRMZM2G161506_P01	-0.0488599	0.013498	0.0154976	0.592062	0.529671	0.527571
AC177850.2_FGP005	-0.0932633	0.0712135	0.0223323	0.595981	0.431569	0.480369
GRMZM2G090500_P01	-0.0454314	-0.162299	0.0695647	0.598365	0.716508	0.486045
GRMZM2G163421_P01	0.00028851	-0.0152284	0.0236102	0.599032	0.617204	0.575796
GRMZM2G172274_P01	-0.0900349	0.0654344	-0.0264989	0.600175	0.444773	0.539531
GRMZM2G066860_P03	-0.0539429	0.0432045	-0.0215115	0.601506	0.504468	0.569102
GRMZM2G129761_P01	-0.0569414	0.064469	-0.00216567	0.612777	0.491802	0.555816
GRMZM2G391627_P01	-0.0430512	0.0490731	-0.00202119	0.613249	0.521051	0.573278
GRMZM2G127963_P01	-0.0831412	0.0339339	0.0221902	0.614192	0.498251	0.508936
GRMZM2G027479_P01	0.0381552	-0.0491584	0.0203422	0.614945	0.702392	0.632827
GRMZM2G438386_P01	-0.110449	0.0668125	-0.00679665	0.616922	0.437441	0.513592
GRMZM2G096247_P01	-0.16942	0.0227584	0.124725	0.619178	0.426855	0.325041
GRMZM2G125268_P01	-0.0159576	0.0629506	-0.0396366	0.623024	0.541713	0.644318
GRMZM2G180654_P02	-0.0536434	0.0640551	-0.0162494	0.623118	0.50711	0.585732
GRMZM2G009030_P01	-0.0597957	-0.115597	0.157561	0.62368	0.678342	0.40523
GRMZM2G142413_P01	0.0229004	-0.00534787	-0.00868224	0.625177	0.653427	0.656817
GRMZM2G071790_P05	-0.0778022	0.0588014	0.00331439	0.626019	0.487281	0.545277
GRMZM2G003501_P01	0.0284277	-0.011588	-0.0147911	0.631523	0.674822	0.678162
GRMZM2G114552_P04	0.0169241	0.0306892	-0.0649175	0.632734	0.615699	0.711319
GRMZM2G145280_P01	-0.0110064	-0.0267928	0.0392788	0.640066	0.655718	0.589763
GRMZM2G075701_P01	-0.242465	0.0608775	0.030548	0.645333	0.340961	0.371169
GRMZM2G083253_P02	-0.0567913	0.0762854	-0.0650684	0.651683	0.516116	0.660655
GRMZM2G160541_P02	0.0366088	-0.0661253	0.0440443	0.659011	0.761711	0.6515
GRMZM2G149317_P01	-0.176577	0.233888	-0.139236	0.660929	0.251931	0.623492
GRMZM2G098237_P01	-0.0557412	0.000865357	0.0388576	0.66257	0.604925	0.570074
GRMZM2G140809_P01	0.00201836	-0.00332202	-0.00795672	0.663299	0.668573	0.675816
GRMZM2G441347_P01	0.00690837	0.0404015	-0.0253239	0.663663	0.630126	0.699107
GRMZM2G015603_P01	0.0119249	-0.0530446	-0.00621696	0.66421	0.726221	0.679334
GRMZM2G384338_P01	0.0277203	-0.0576919	0.0243197	0.669934	0.753519	0.670387
GRMZM2G118362_P01	-0.124377	0.0776532	-0.046623	0.674822	0.473839	0.597031
GRMZM2G152686_P01	-0.144808	0.0640551	-0.0383026	0.675816	0.469678	0.569199
GRMZM2G165357_P01	0.131194	-0.0835998	-0.114504	0.677621	0.88885	0.919683
GRMZM2G109130_P01	0.00158609	0.00489684	0.00748258	0.684998	0.685626	0.678973
GRMZM2G164696_P01	0.0394192	-0.021365	-0.0531943	0.694479	0.756255	0.788185
GRMZM2G084958_P01	0.00762609	-0.0190242	-0.00173227	0.70115	0.727877	0.715278
GRMZM2G062481_P01	0.0455828	-0.0433485	0.00963382	0.708585	0.797594	0.741834
GRMZM2G139786_P01	-0.0197553	0.00776959	0.0253123	0.714839	0.68724	0.669752
GRMZM2G359018_P01	-0.157946	0.216982	-0.0446872	0.733701	0.358621	0.619272
GRMZM2G106690_P01	-0.255494	0.0603241	0.00977712	0.737427	0.421264	0.470615
GRMZM2G127948_P01	0.0230424	-0.0328314	0.0183493	0.74123	0.797179	0.749234
GRMZM2G078641_P01	-0.116848	0.119423	-0.0126064	0.748375	0.512075	0.644133
GRMZM2G063287_P01	-0.0388953	-0.0262051	0.0576929	0.750263	0.736475	0.652601
GRMZM2G085661_P01	-0.030914	-0.052446	0.0569996	0.757706	0.777956	0.667393
GRMZM2G074604_P01	0.0110662	-0.0126064	0.00963382	0.777788	0.804714	0.779218
GRMZM2G112805_P01	-0.0917251	0.0517201	-0.0357862	0.782157	0.638584	0.729357
GRMZM2G123940_P01	-0.378944	0.0701145	0.118891	0.826925	0.378068	0.330903
GRMZM2G106424_P01	-0.0259113	-0.048263	0.0851527	0.833173	0.852798	0.719315
GRMZM2G154523_P01	0.0017302	-0.0253239	0.0321008	0.841249	0.865127	0.810813
GRMZM2G169458_P01	0.026446	-0.0215115	-0.0423082	0.841249	0.88924	0.909965
GRMZM2G013082_P01	-0.0397849	-0.0584429	0.126841	0.844225	0.861797	0.677621
GRMZM6G132224_P01	0.0501882	-0.0102797	-0.0897278	0.863621	0.923796	1.00007
GRMZM5G898755_P01	0.0094905	0.030548	-0.0337172	0.873656	0.849999	0.914335
GRMZM2G075283_P01	0.0319597	0.0278618	-0.0418626	0.873813	0.875623	0.947853
GRMZM2G355752_P01	0.0143553	-0.00491352	0.00417776	0.877823	0.897163	0.89103
GRMZM2G009188_P01	0.179001	-0.103302	0.0380147	0.90049	1.17913	1.04194
GRMZM2G429955_P01	-0.138759	0.169284	-0.0275279	0.907429	0.59846	0.79693
AC217050.4_FGP006	-0.00404521	0.0107798	0.0311128	0.911346	0.893285	0.87743
GRMZM2G010196_P01	0.0380147	-0.0124608	-0.00723157	0.930548	0.980976	0.97944
AC148152.3_FGP005	-0.0665784	0.067914	0.0415234	0.937646	0.8062	0.829687
GRMZM2G126682_P01	-0.171531	-0.0693005	0.172231	0.941482	0.839395	0.596744
GRMZM2G152908_P01	-0.00694161	0.0179219	0.000865357	0.962364	0.937495	0.954494
GRMZM2G156861_P02	-0.0143539	0.0336521	-0.00534787	1.02176	0.973648	1.01264
GRMZM2G075140_P01	-0.0126064	0.11703	-0.0903421	1.04299	0.91219	1.11956
GRMZM2G388892_P01	0.0211954		-0.0718761	0.374288		0.468635
GRMZM2G043903_P02		0.00028851	0.000144262		0.455123	0.455229
GRMZM6G810942_P01	0.0746424		-0.0700575	0.379177		0.524064
GRMZM6G910222_P01	-0.0399332		0.0167816	0.651867		0.596458

## Sheet: first leaf hei8834 res
The log2 (fold change) of hei8834-responsive proteins at first leaf stage. Each sample had three replicates.
Accession Number	first leaf stage
	hei8834-log2FC-(-)-rep1	hei8834-log2FC-(-)-rep2	hei8834-log2FC-(-)-rep3	hei8834-log2FC-(+)-rep1	hei8834-log2FC-(+)-rep2	hei8834-log2FC-(+)-rep3
AC209898.2_FGP004	0.295723	-0.165046	-0.0242965	-1.17234	-0.712646	-0.853345
GRMZM2G175401_P01	0.184978	-0.142258	-0.112163	-1.0607	-0.730488	-0.76048
GRMZM2G123896_P04	0.0291348	-0.0545421	0.124328	-1.05349	-0.969735	-1.14912
GRMZM2G075502_P01	0.0503276	-0.048263	0.0104934	-1.01771	-0.915936	-0.977668
GRMZM2G063431_P01	-0.093879	0.0180644	0.0336521	-0.944527	-1.05679	-1.07188
GRMZM2G014902_P01	0.0396999	-0.0881934	0.140517	-0.869333	-0.739131	-0.96917
GRMZM2G047002_P01	0.0766959	-0.102372	0.00317044	-0.80667	-0.627716	-0.733363
GRMZM2G081114_P01	0.0309716	-0.0623543	-0.0384508	-0.792607	-0.699232	-0.723087
GRMZM2G062076_P02	0.0183493	-0.025177	-0.0128975	-0.766357	-0.725231	-0.735043
GRMZM2G070167_P01	0.00575927	0.0792928	-0.059044	-0.725947	-0.79937	-0.661091
GRMZM5G855347_P02	0.0538064	-0.0282633	-0.0609992	-0.713829	-0.631735	-0.596187
GRMZM2G071450_P01	-0.00418989	-0.0215115	0.00547185	-0.700404	-0.675996	-0.710048
GRMZM2G130053_P01	-0.0332742	-0.093879	0.093425	-0.677841	-0.617056	-0.8044
GRMZM2G168552_P01	-0.000577193	-0.113723	0.0844725	-0.67738	-0.564265	-0.759502
GRMZM2G070011_P01	0.0880059	0.0448837	-0.121549	-0.64273	-0.600118	-0.435963
GRMZM2G317451_P01	0.0479571	-0.0163953	-0.00476877	-0.642504	-0.578198	-0.587056
GRMZM2G014695_P01	-0.00795672	-0.0206331	0.0319597	-0.621488	-0.607793	-0.660406
GRMZM2G069911_P01	-0.046772	0.00705194	0.0892269	-0.617941	-0.671853	-0.753166
GRMZM2G154725_P01	0.0497702	-0.127526	0.0497702	-0.611976	-0.43733	-0.614845
GRMZM6G397851_P01	0.0143553	-0.0998964	0.101112	-0.608452	-0.494109	-0.695022
GRMZM2G480850_P01	0.0746424	-0.117005	-0.000144277	-0.607133	-0.411579	-0.528656
GRMZM2G378121_P01	0.130008	-0.0219508	-0.0582927	-0.594225	-0.440459	-0.404305
GRMZM2G031501_P05	-0.0123153	-0.00636186	0.0221902	-0.563625	-0.567254	-0.598151
GRMZM2G139643_P01	0.0295589	-0.0779544	0.0542233	-0.560643	-0.453241	-0.585323
GRMZM2G126261_P01	0.0152121	-0.0646157	0.0370307	-0.55703	-0.48217	-0.584025
GRMZM2G055704_P01	0.155749	-0.128787	0.0339339	-0.550043	-0.264131	-0.427013
GRMZM2G000219_P01	0.0163537	0.00374614	-0.0187318	-0.549831	-0.539729	-0.517255
GRMZM2G122337_P01	0.0156403	-0.0954196	0.0564448	-0.54962	-0.445166	-0.597278
GRMZM2G175562_P02	0.0451634	-0.0881934	0.00216242	-0.538891	-0.405451	-0.495939
GRMZM2G113349_P01	0.0196308	-0.109359	0.055751	-0.534078	-0.405069	-0.57025
GRMZM2G481261_P01	0.110631	-0.129892	0.0612923	-0.525123	-0.283316	-0.474532
GRMZM2G339091_P01	0.0126402	-0.0344558	0.0299829	-0.524085	-0.47694	-0.541198
GRMZM2G110504_P01	0.0453032	-0.0825301	0.0179219	-0.523463	-0.395739	-0.492281
GRMZM2G049349_P01	0.0551957	-0.0338649	0.00934717	-0.517048	-0.427983	-0.468332
GRMZM2G399183_P01	0.0219061	-0.00202119	-0.0259113	-0.508814	-0.484994	-0.456999
GRMZM2G410757_P01	0.00028851	0.136191	-0.0738487	-0.506148	-0.644533	-0.43226
GRMZM2G168590_P01	-0.00607208	-0.0578421	0.0367495	-0.505738	-0.453834	-0.546245
GRMZM2G118037_P01	0.0588014	-0.0733933	-0.0511002	-0.503487	-0.371086	-0.395549
GRMZM2G003762_P03	-0.0153742	-0.00433459	0.00504062	-0.501239	-0.516017	-0.525538
GRMZM2G130904_P01	-0.000432873	-0.132104	0.0521376	-0.50083	-0.369222	-0.553426
AC197758.3_FGP004	0.000576963	-0.000288568	0.00446544	-0.493703	-0.49289	-0.497568
GRMZM2G167356_P02	0.046002	-0.0112971	-0.0253239	-0.491267	-0.434403	-0.420241
GRMZM2G174699_P01	0.0347792	-0.152324	0.0464212	-0.485802	-0.298673	-0.497568
GRMZM2G013342_P01	0.0147838	-0.026352	0.00028851	-0.480156	-0.438894	-0.458584
GRMZM2G064518_P01	0.0207689	0.0122111	-0.0359341	-0.478145	-0.471929	-0.42372
GRMZM2G104481_P01	0.00158609	0.0650208	-0.0101344	-0.47694	-0.543299	-0.465739
GRMZM2G152105_P03	0.0315364	0.0254541	-0.0696033	-0.465739	-0.462754	-0.367918
GRMZM2G175989_P01	0.0582472	-0.0542425	-0.00665171	-0.464146	-0.351811	-0.399159
GRMZM2G094990_P01	-0.0674852	0.0436245	0.0439044	-0.463748	-0.57497	-0.575185
GRMZM2G079759_P01	-0.0499049	0.0164963	0.0206267	-0.463549	-0.526577	-0.530322
GRMZM2G034764_P01	-0.0983511	-0.02283	0.0977456	-0.462157	-0.538891	-0.654717
GRMZM2G099191_P01	-0.054692	0.0965317	0.190552	-0.452649	-0.603621	-0.693621
GRMZM2G130586_P01	0.0415234	-0.0319461	0.0071955	-0.448312	-0.374823	-0.413692
GRMZM2G162359_P01	-0.00723157	-0.00723157	0.0140696	-0.446738	-0.446738	-0.468332
GRMZM2G042032_P02	0.0401209	-0.108892	0.0387171	-0.445166	-0.293182	-0.441438
GRMZM2G036708_P01	0.00475306	-0.0169791	0.0143553	-0.442418	-0.420627	-0.451859
GRMZM2G059392_P02	0.0071955	0.00489684	-0.0174171	-0.440068	-0.437721	-0.415422
AC234522.1_FGP005	0.00345832	-0.0518477	0.0313952	-0.438894	-0.3876	-0.470929
GRMZM2G472693_P02	0.00733905	-0.052446	0.0387171	-0.434793	-0.377257	-0.465938
GRMZM2G021687_P01	-0.03623	-0.0421597	0.0652966	-0.434208	-0.425462	-0.53575
GRMZM2G010044_P01	-0.000721528	0.0597706	-0.0317986	-0.433818	-0.49147	-0.400492
GRMZM2G106928_P01	-0.00332202	-0.0279691	0.0458623	-0.429343	-0.39935	-0.477542
GRMZM2G127361_P01	0.00963382	-0.0602469	0.0280033	-0.428178	-0.358269	-0.446541
GRMZM2G174708_P01	0.0183493	-0.113567	0.0732718	-0.4243	-0.289827	-0.476739
GRMZM2G162748_P01	0.0250288	-0.0331266	0.0117819	-0.420241	-0.359009	-0.402207
GRMZM2G009320_P02	0.0247452	0.00129784	-0.0320936	-0.417733	-0.394221	-0.36086
GRMZM2G336879_P01	0.0353424	-0.0594949	0.0187766	-0.417348	-0.324816	-0.400873
GRMZM2G096695_P01	-0.0331266	0.0394192	-0.017125	-0.413115	-0.482573	-0.429149
GRMZM5G875238_P01	-0.0215115	0.0309716	-0.00549268	-0.400111	-0.452451	-0.416
GRMZM2G076544_P01	-0.0560412	0.164143	-0.0408234	-0.382325	-0.605376	-0.400301
GRMZM2G068271_P01	-0.0368218	-0.00231016	0.0392788	-0.374075	-0.406216	-0.450084
GRMZM2G147279_P01	-0.0791732	-0.0260582	0.0980152	-0.37258	-0.424688	-0.548776
GRMZM2G167758_P01	-0.0281162	-0.0209258	0.0437644	-0.366987	-0.374262	-0.441438
GRMZM6G101378_P01	-0.0616013	0.138028	-0.0399332	-0.362343	-0.56192	-0.383831
GRMZM2G099454_P02	-0.0248835	-0.0357862	0.0632268	-0.35716	-0.346298	-0.442614
GRMZM2G134846_P01	-0.12926	0.0392788	0.0561673	-0.355682	-0.524293	-0.542248
GRMZM2G090595_P01	-0.0443896	0.0434845	0.0197731	-0.351074	-0.437916	-0.414268
GRMZM2G057186_P01	-0.0347513	0.0164963	-0.00737657	-0.346115	-0.396119	-0.374636
GRMZM2G080375_P01	-0.0676364	0.238542	-0.0174171	-0.320846	-0.625934	-0.370154
GRMZM2G135904_P02	-0.10067	0.218223	-0.106094	-0.288417	-0.604718	-0.281912
GRMZM2G465169_P02	0.164271	-0.186886	0.0139267	0.215368	0.566474	0.366924
GRMZM2G033680_P01	0.122076	-0.00795672	-0.0528949	0.250962	0.377624	0.422556
GRMZM2G100260_P02	0.111031	-0.0781067	0.023894	0.265197	0.455439	0.353323
GRMZM5G802566_P06	0.116365	-0.097116	-0.00520307	0.267236	0.482848	0.388796
GRMZM2G442057_P01	0.126841	-0.0555913	0.0507455	0.270708	0.452174	0.345851
GRMZM2G123624_P01	0.124063	-0.0557412	-0.0857417	0.274411	0.455018	0.481816
GRMZM2G175272_P01	0.106214	-0.0381545	-0.0153742	0.277152	0.422771	0.397584
GRMZM2G021794_P01	0.102591	-0.0396366	-0.108114	0.278461	0.418136	0.487589
GRMZM2G028883_P01	0.125916	-0.0800879	0.0253123	0.280838	0.488104	0.381394
GRMZM2G110233_P01	0.101919	-0.0350469	-0.143532	0.291014	0.430285	0.537545
GRMZM5G883149_P03	0.0859685	-0.0226834	-0.0218044	0.301002	0.406428	0.406646
GRMZM2G128564_P01	0.0970714	-0.0298826	-0.0207795	0.302173	0.429107	0.420078
GRMZM5G850904_P01	0.0831112	-0.103922	0.0346383	0.307429	0.492315	0.354678
GRMZM2G018241_P01	0.0861044	-0.0380063	-0.0338649	0.310456	0.43189	0.427713
GRMZM2G061096_P01	0.0886844	0.0392788	-0.0552915	0.315566	0.367595	0.459537
GRMZM2G009136_P01	0.172103	-0.430898	-0.109514	0.316262	0.918157	0.59684
GRMZM2G084757_P01	0.0571383	-0.0385989	-0.0381545	0.316957	0.409364	0.408821
GRMZM2G070899_P02	0.0697022	-0.154249	0.090718	0.317072	0.541019	0.294782
GRMZM2G053319_P01	0.0569996	-0.0126064	-0.0219508	0.318809	0.385928	0.397365
GRMZM2G032266_P01	0.0795658	-0.032979	-0.0348991	0.321004	0.436482	0.435522
GRMZM2G063806_P01	0.0567222	-0.078716	0.0119249	0.326537	0.462052	0.37128
GRMZM2G053652_P02	0.0805212	-0.0732415	-0.0194628	0.334683	0.488412	0.434562
GRMZM2G143791_P01	0.118493	-0.208561	0.0272956	0.334797	0.664756	0.425996
GRMZM2G176612_P02	0.0373119	-0.101289	0.0375931	0.336283	0.47228	0.336398
GRMZM2G403797_P01	0.046002	-0.00144342	-0.0363779	0.339137	0.389126	0.424492
GRMZM2G446960_P01	0.0388576	-0.0223904	-0.0181473	0.339594	0.398788	0.397036
GRMZM5G811749_P01	0.0795658	-0.117005	0.0388576	0.344601	0.541217	0.385044
GRMZM2G336815_P01	0.0399806	-0.00317743	-0.0285576	0.34551	0.385486	0.410992
GRMZM2G100146_P01	0.0647449	-0.0528949	-0.027822	0.347099	0.467488	0.442121
GRMZM2G403007_P01	0.128557	-0.15457	0.0411028	0.348799	0.633664	0.436268
GRMZM2G459291_P01	0.0367495	-0.0256175	0.0284277	0.348912	0.410341	0.358509
GRMZM2G025171_P01	0.0204844	-0.00462403	-0.0585932	0.349139	0.374288	0.428142
GRMZM2G168330_P02	0.0835197	-0.0715728	0.0224743	0.349818	0.504976	0.413161
GRMZM6G741620_P02	0.0765591	-0.00824689	-0.0313562	0.353549	0.437441	0.46048
GRMZM2G052078_P02	0.0200577	-0.0536434	0.0271541	0.353888	0.429964	0.346758
GRMZM2G105712_P06	0.0628125	-0.0717244	0.0113525	0.354001	0.487692	0.404358
GRMZM2G060842_P01	0.0399806	-0.0220973	-0.00202119	0.354452	0.419215	0.396379
GRMZM2G302233_P01	0.0203422	-0.00592721	-0.0175631	0.354791	0.381062	0.395282
GRMZM2G027862_P01	0.0539454	-0.0542425	0.0583858	0.354791	0.460061	0.347439
GRMZM2G063896_P01	0.0213376	-0.0107156	-0.0105703	0.354903	0.389567	0.386811
GRMZM2G004699_P01	0.0223323	-0.0128975	0.00273852	0.356257	0.391658	0.375735
GRMZM2G150030_P01	0.028852	0.00144197	-0.0212186	0.356933	0.387142	0.406863
GRMZM2G124963_P01	0.0267293	-0.0110064	-0.0126064	0.359521	0.395721	0.397803
GRMZM2G109130_P01	0.0272956	-0.0303245	0.0024505	0.359521	0.414136	0.381283
GRMZM2G000660_P01	0.00934717	-0.110604	0.0469799	0.359971	0.479748	0.322274
GRMZM2G014577_P01	0.0462815	-0.156177	-0.0325362	0.361881	0.563158	0.439464
GRMZM2G445057_P03	0.0422241	-0.0107156	-0.0320936	0.362778	0.415759	0.439783
GRMZM2G155329_P01	0.0321008	-0.0291463	0.00647756	0.364124	0.422771	0.389897
GRMZM2G011491_P01	0.0192037	0.00230647	-0.02283	0.364236	0.381173	0.408821
GRMZM5G819807_P01	0.0160684	-0.0310614	0.0221902	0.365133	0.415326	0.358959
GRMZM2G044629_P01	0.0518593	-0.0579923	-0.0341603	0.366028	0.4728	0.449007
GRMZM2G363540_P01	0.00877371	-0.0275279	0.015783	0.36614	0.405121	0.359071
GRMZM2G702426_P01	0.0409625	-0.0791732	0.0497702	0.366252	0.485839	0.354565
GRMZM2G087326_P01	0.0219061	-0.00868224	-0.0136255	0.3667	0.397255	0.405448
GRMZM2G147726_P01	0.0247452	-0.032979	0.00446544	0.367483	0.423202	0.385818
GRMZM2G371375_P01	0.0146409	-0.0552915	0.0282862	0.370164	0.440208	0.356482
GRMZM2G017269_P01	0.0546401	-0.253601	0.041243	0.370499	0.679694	0.383939
GRMZM2G012031_P01	0.0301242	-0.0518477	0.0149265	0.371726	0.451224	0.387142
GRMZM2G132093_P01	0.0959919	-0.0191704	-0.0400815	0.372618	0.487692	0.505891
GRMZM2G089713_P07	0.0223323	0.00575927	-0.026352	0.374622	0.391108	0.423202
GRMZM2G138527_P01	0.0621217	-0.030914	-0.00216567	0.376068	0.468427	0.437015
GRMZM2G139874_P01	0.0094905	0.0129262	-0.00636186	0.377068	0.376735	0.395831
GRMZM2G005886_P01	0.0350608	-0.0560412	0.0103502	0.37729	0.468323	0.402067
GRMZM2G152466_P01	0.000576963	0.0298416	-0.0272338	0.378512	0.352871	0.410015
GRMZM2G060886_P02	0.0203422	-0.0245899	-0.0257644	0.379843	0.428142	0.425889
GRMZM2G127963_P01	0.0184917	-0.0181473	0.000432744	0.380175	0.417812	0.401849
GRMZM2G035557_P01	0.0146409	-0.0790208	0.0489336	0.380286	0.471135	0.346078
GRMZM5G809292_P02	0.032383	-0.0496062	0.00791308	0.381505	0.463622	0.408494
GRMZM2G110145_P01	0.0173518	-0.062957	0.134221	0.381616	0.461843	0.265677
GRMZM2G013461_P01	0.0319597	-0.0418626	0.0339339	0.382501	0.459117	0.383165
GRMZM2G059449_P01	0.0164963	0.0207689	-0.173319	0.382833	0.377735	0.571919
GRMZM2G304362_P01	0.0328061	-0.052446	0.0177794	0.382944	0.46874	0.395282
GRMZM2G553687_P01	0.00432161	-0.00462403	0.00158609	0.383055	0.388024	0.381837
GRMZM2G060561_P02	0.0201999	-0.00101024	-0.00433459	0.384271	0.402831	0.408929
GRMZM2G003384_P01	0.0641931	-0.0561912	-0.00940813	0.384713	0.507719	0.458382
GRMZM2G415491_P01	0.0229004	-0.0475173	0.0164963	0.385044	0.455439	0.391548
GRMZM2G180399_P01	0.00259452	0.067914	-0.0391918	0.387804	0.322505	0.429643
GRMZM2G010801_P02	0.00360224	-0.0508013	0.0342157	0.388355	0.445091	0.359858
GRMZM2G071360_P01	0.0297002	-0.0619024	0.00748258	0.388465	0.480058	0.40969
GRMZM2G064993_P01	0.0299829	0.0107798	-0.0384508	0.388575	0.410775	0.456911
GRMZM2G043291_P02	0.0350608	-0.00317743	-0.0322412	0.388686	0.426855	0.455965
GRMZM2G064640_P01	-0.00433459	-0.0423082	0.0370307	0.390558	0.431249	0.349139
GRMZM2G063287_P01	0.0554733	-0.165855	0.101112	0.390998	0.611267	0.346531
GRMZM2G062210_P01	0.0289934	-0.0405266	0.0206267	0.391328	0.458067	0.399554
GRMZM2G116053_P01	0.0328061	0.00360224	-0.0802404	0.392098	0.419215	0.504163
GRMZM2G148769_P02	0.0230424	0.0103502	-0.0242965	0.392207	0.401849	0.439251
GRMZM2G110023_P01	0.0958569	-0.139395	0.0450235	0.392537	0.625551	0.444031
GRMZM2G430600_P02	0.0190614	-0.0735451	0.0416635	0.392757	0.485427	0.370164
GRMZM2G163227_P01	0.0182069	-0.0234164	0.00963382	0.393197	0.435095	0.399335
GRMZM2G063909_P03	0.0169241	-0.046176	0.0560285	0.393416	0.453122	0.350837
GRMZM2G077708_P01	-0.0143539	0.00532812	0.000721167	0.394075	0.372172	0.379066
GRMZM2G086636_P01	0.0382957	-0.00346663	-0.046325	0.394404	0.438932	0.479024
GRMZM2G081144_P01	0.0521376	-0.0442408	-0.0396366	0.394404	0.488104	0.483364
GRMZM2G023242_P04	-0.00984383	-0.182459	0.0958569	0.394843	0.568421	0.289126
GRMZM2G108123_P01	0.00389003	-0.0854355	0.0878701	0.394953	0.485427	0.309991
GRMZM2G157296_P01	0.0299829	-0.12202	0.0508847	0.395502	0.550704	0.374511
GRMZM2G060947_P01	0.0159257	0.0367495	-0.0572415	0.395721	0.374956	0.472072
GRMZM2G013798_P01	-0.00303285	-0.00303285	0.0017302	0.396269	0.396269	0.391548
GRMZM2G127756_P01	0.00446544	-0.0396366	0.0240359	0.397036	0.441165	0.380064
GRMZM2G027021_P01	0.0301242	-0.0414171	0.0122111	0.397036	0.465295	0.411752
GRMZM2G408305_P02	-0.0114425	-0.0518477	0.0342157	0.397803	0.437867	0.348912
GRMZM2G042683_P01	-0.0156659	-0.0245899	0.0450235	0.398022	0.404031	0.334454
GRMZM2G051677_P01	0.0113525	0.0017302	-0.00158784	0.399007	0.412402	0.411969
GRMZM2G101004_P01	0.00547185	-0.0537932	0.0501882	0.399773	0.455755	0.351741
GRMZM2G134256_P01	0.0321008	-0.0353426	0.0113525	0.399773	0.467384	0.420617
GRMZM2G144730_P01	-0.0147911	-0.059044	0.0603241	0.400101	0.444455	0.325156
GRMZM2G116427_P01	0.0213376	-0.00752159	-0.0260582	0.400429	0.427928	0.446574
AC197246.3_FGP001	0.0196308	-0.0429026	0.0204844	0.400429	0.463204	0.397036
GRMZM2G148200_P01	0.0071955	-0.0348991	0.0169241	0.40163	0.441377	0.389677
GRMZM2G365160_P01	0.0102069	0.0124972	0.000865357	0.40174	0.399554	0.411209
GRMZM2G168364_P01	-0.021365	0.0326651	-0.0153742	0.40294	0.349026	0.396927
GRMZM2G107082_P01	-0.0150826	0.0350608	-0.0209258	0.403377	0.356369	0.409255
GRMZM2G438386_P01	-0.0111517	0.00446544	-0.00115462	0.403377	0.390007	0.393197
GRMZM2G156673_P01	0.0356239	-0.0623543	0.0236102	0.40414	0.502229	0.418784
GRMZM2G005980_P01	-0.00101024	-0.027675	0.0024505	0.404794	0.429214	0.399007
GRMZM6G639283_P01	-0.0267928	0.0382957	-0.0272338	0.405666	0.343692	0.406101
GRMZM2G445602_P01	0.00504062	-0.00607208	0.00547185	0.405666	0.41684	0.405339
GRMZM2G134398_P02	0.0170667	0.00762609	-0.0187318	0.40621	0.413269	0.439783
GRMZM2G119219_P03	-0.0194628	-0.106249	0.0753273	0.407081	0.49375	0.312317
AC209257.4_FGP008	0.093425	-0.046921	-0.175599	0.407733	0.546067	0.674641
GRMZM2G029396_P01	0.00848689	0.0219061	-0.0322412	0.407842	0.392098	0.44869
GRMZM2G128171_P03	0.0114956	0.0404015	-0.0312088	0.408929	0.382833	0.454492
GRMZM2G125032_P01	0.00504062	0.00201836	-0.00795672	0.409038	0.412185	0.423202
GRMZM2G071745_P02	0.0071955	0.00647756	-0.0150826	0.410124	0.413052	0.432425
GRMZM2G156861_P02	0.00028851	0.00891709	-0.00346663	0.410992	0.399445	0.41511
GRMZM2G172932_P03	-0.0244432	0.0229004	0.00604663	0.411535	0.366588	0.383497
GRMZM2G439457_P02	0.00360224	-0.0209258	0.0381552	0.414785	0.436695	0.380286
GRMZM2G095534_P04	0.00230647	-0.00520307	-0.000288568	0.415434	0.422879	0.420725
GRMZM2G061950_P01	0.0236102	-0.0225369	0.00647756	0.415759	0.461948	0.435735
GRMZM2G115766_P01	0.134615	-0.180168	-0.0423082	0.416948	0.730401	0.591392
GRMZM2G140545_P01	0.0371713	0.00863031	-0.0403782	0.417164	0.442015	0.490981
AC194341.4_FGP002	0.0353424	-0.046921	0.00575927	0.417164	0.502127	0.44668
GRMZM2G159369_P01	0.0571383	-0.0487106	0.00158609	0.417488	0.52647	0.475811
GRMZM2G072080_P01	0.0253123	-0.148321	0.055751	0.417596	0.591296	0.387252
GRMZM2G124732_P01	0.00100953	0.000576963	-0.000288568	0.417812	0.417164	0.420294
GRMZM2G027728_P01	0.0267293	-0.0712696	0.0375931	0.418676	0.516419	0.407733
GRMZM2G163325_P01	-0.0184396	-0.0081018	0.0472592	0.41997	0.40969	0.356482
GRMZM2G027451_P04	0.0364682	-0.0366739	0.00647756	0.420186	0.496718	0.450274
GRMZM2G142097_P02	0.0469799	-0.0676364	0.0284277	0.420186	0.532367	0.436162
GRMZM5G800853_P01	-0.0143539	0.0284277	0.000432744	0.420402	0.376179	0.40305
GRMZM2G146951_P01	0.0149265	-0.0126064	-0.0114425	0.420833	0.448372	0.449957
GRMZM2G114888_P02	0.0709388	-0.0819191	0.0375931	0.42094	0.575022	0.453228
GRMZM2G024310_P01	0.0274372	-0.046772	0.0301242	0.421802	0.493237	0.419107
GRMZM5G820727_P06	-0.0421597	-0.0348991	0.088413	0.422341	0.412727	0.28948
GRMZM2G042502_P01	0.00374614	0.0104934	-0.0111517	0.422771	0.416083	0.437654
GRMZM2G060870_P02	0.0194884	-0.0603973	0.0241778	0.423309	0.500394	0.418784
GRMZM2G010868_P01	0.0380147	-0.0655212	0.0246034	0.424922	0.528671	0.435735
GRMZM5G844628_P01	0.00432161	-0.0137711	0.0152121	0.426318	0.447526	0.418136
GRMZM2G146475_P01	0.00187429	-0.0181473	0.0221902	0.426426	0.445303	0.407625
GRMZM2G089365_P01	0.0152121	0.00389003	-0.0163953	0.426855	0.440846	0.458487
GRMZM2G079777_P01	0.030548	-0.025177	-0.0099891	0.427928	0.480679	0.4654
GRMZM2G380457_P01	0.0680516	-0.0184396	-0.0234164	0.428142	0.511569	0.516519
GRMZM2G101900_P02	-0.00216567	0.0450235	-0.0320936	0.429	0.381837	0.458907
GRMZM2G137961_P01	0.0803848	-0.139713	-0.094187	0.429107	0.647084	0.600555
GRMZM2G027723_P01	0.0306892	-0.0307666	-0.00708658	0.430499	0.495286	0.468323
GRMZM2G021567_P01	0.0106366	0.0926134	-0.0505024	0.430606	0.348572	0.492725
GRMZM2G028986_P01	-0.00231016	0.0922074	-0.0605477	0.43082	0.333424	0.486148
GRMZM2G061912_P01	-0.0131886	0.0342157	-0.0194628	0.430928	0.383608	0.437334
GRMZM2G112535_P01	0.0126402	-0.113879	0.0965317	0.431142	0.558659	0.348346
GRMZM2G139550_P02	-0.00115462	-0.0112971	0.00992041	0.431463	0.44159	0.423094
GRMZM2G054765_P01	-0.0099891	0.00934717	0.0192037	0.431997	0.415218	0.405666
GRMZM2G078985_P01	0.0473988	-0.0852824	0.0353424	0.432104	0.567059	0.446574
GRMZM2G029933_P01	0.00475306	0.00259452	-0.00694161	0.432959	0.436268	0.442439
GRMZM2G023748_P01	0.0174944	0.0758749	-0.0718761	0.43328	0.370945	0.521453
GRMZM2G043336_P01	-0.0175631	-0.00534787	0.0224743	0.434348	0.422125	0.394185
GRMZM2G123714_P01	0.0160684	-0.0396366	0.0308304	0.437121	0.490467	0.422664
GRMZM2G035477_P01	0.0673634	-0.0153742	-0.00795672	0.438186	0.52095	0.513592
GRMZM2G009464_P01	-0.0365259	0.0961269	-0.027822	0.438932	0.306146	0.432746
GRMZM5G807835_P01	-0.0184396	0.0347792	-0.0347513	0.438932	0.388575	0.455334
GRMZM2G325019_P01	0.00028851	0.0182069	-0.00187672	0.439251	0.423955	0.444031
GRMZM2G101446_P01	0.0142124	-0.0335695	0.0254541	0.439357	0.490673	0.428035
GRMZM2G115615_P01	0.0692897	-0.0319461	-0.0126064	0.439464	0.543397	0.523863
GRMZM2G397759_P01	-0.0536434	0.0912598	-0.0871202	0.43957	0.292311	0.473112
GRMZM2G124239_P01	0.00259452	0.00028851	0.00877371	0.440952	0.443076	0.434668
GRMZM2G074267_P01	0.0361868	-0.0548418	0.0780633	0.442121	0.532167	0.400319
GRMZM2G058057_P01	-0.0576919	0.064331	-0.0634092	0.443288	0.322274	0.447844
GRMZM2G051403_P01	-0.00766662	0.00532812	0.00776959	0.443819	0.43082	0.428464
GRMZM2G359331_P01	-0.0676364	0.00273852	0.284159	0.444667	0.375178	0.0939658
GRMZM2G071518_P01	0.0040339	-0.0313562	0.0496308	0.444667	0.479024	0.400429
GRMZM2G145175_P02	0.0176369	0.00662118	-0.0262051	0.447315	0.461005	0.492315
GRMZM2G141707_P01	0.0236102	-0.0316512	0.0204844	0.447421	0.502534	0.45038
GRMZM2G084942_P02	-0.0044793	0.0140696	-0.0110064	0.449324	0.427821	0.452912
GRMZM2G153208_P01	0.0251706	-0.0457292	0.026021	0.449324	0.520146	0.451224
GRMZM2G122805_P01	0.0549179	-0.03623	0.00561557	0.450063	0.541118	0.496718
GRMZM2G178807_P01	-0.00911773	0.0024505	0.0113525	0.451541	0.439889	0.431997
GRMZM2G150791_P01	0.0204844	-0.00737657	-0.00926292	0.452595	0.477677	0.479541
GRMZM2G445905_P03	0.00690837	-0.0650684	0.0382957	0.455018	0.523562	0.420186
GRMZM2G428168_P01	-0.00390054	-0.0232698	0.0822938	0.456386	0.475707	0.370164
GRMZM2G157018_P01	0.065848	-0.0381545	-0.0166871	0.456491	0.560519	0.539134
GRMZM2G144155_P01	0.0150693	-0.0418626	0.0342157	0.456701	0.513491	0.440421
GRMZM2G464328_P01	-0.0165412	0.0040339	0.0261627	0.456806	0.436268	0.414027
GRMZM2G031545_P02	0.0227584	0.00302648	-0.0247367	0.456911	0.476537	0.504468
GRMZM2G115901_P01	-0.00346663	-0.139554	0.0732718	0.457121	0.593115	0.383276
GRMZM2G171060_P02	-0.00404521	-0.0127519	0.0263043	0.459432	0.466758	0.427713
GRMZM2G024811_P01	0.059909	-0.0564912	-0.037414	0.460061	0.576183	0.557288
GRMZM2G151414_P02	-0.0269398	-0.0460271	0.0729976	0.461319	0.483468	0.364236
GRMZM2G118362_P01	-0.000577193	0.0659858	-0.238204	0.466549	0.399116	0.704429
GRMZM2G063511_P01	-0.0044793	-0.00245467	0.00748258	0.467593	0.465504	0.455649
GRMZM2G056252_P01	0.0588014	-0.0446872	-0.00274373	0.46874	0.572211	0.530271
GRMZM2G107588_P01	-0.00433459	-0.0454314	0.0499095	0.469782	0.508631	0.415759
GRMZM2G006229_P02	-0.0197553	0.0237521	-0.0238564	0.470927	0.428464	0.475085
GRMZM2G075333_P01	0.0187766	-0.00665171	-0.0163953	0.473008	0.498353	0.510759
GRMZM2G001514_P01	0.00317044	-0.0346036	0.0375931	0.474254	0.511974	0.442333
GRMZM2G044684_P01	-0.0150826	0.0514417	-0.0204868	0.474462	0.405121	0.480265
GRMZM2G330635_P01	0.0487942	-0.00897255	-0.0123153	0.474566	0.528971	0.532267
GRMZM2G146246_P02	0.0112094	0.00389003	-0.00824689	0.479748	0.487075	0.499272
GRMZM2G098239_P01	0.00201836	0.00604663	-0.00940813	0.479851	0.475915	0.495081
GRMZM2G098496_P02	-0.0210722	0.0114956	0.00432161	0.480058	0.447526	0.454702
GRMZM2G068471_P01	0.0663992	-0.134952	0.0458623	0.483674	0.684998	0.506907
GRMZM2G314679_P04	0.0396999	-0.0159576	-0.018878	0.484293	0.537048	0.540027
GRMZM2G179703_P02	0.0281448	-0.0270868	0.00547185	0.485736	0.538141	0.508327
GRMZM2G164821_P01	0.0546401	-0.0126064	-0.0146453	0.486972	0.554343	0.554147
GRMZM2G090500_P01	-0.0606982	0.0371713	0.0221902	0.488926	0.390007	0.406428
GRMZM2G359018_P01	-0.0656722	0.0402612	0.00662118	0.489132	0.383165	0.418028
GRMZM2G101875_P01	0.0378742	0.00432161	-0.0369699	0.489646	0.523361	0.564427
GRMZM2G111713_P01	-0.00245467	0.00504062	-0.00144342	0.489748	0.480058	0.488104
GRMZM2G038536_P01	0.0094905	-0.0323887	0.00676478	0.490159	0.532965	0.492827
GRMZM2G165944_P01	-0.0323887	-0.0488599	0.0650208	0.490981	0.507414	0.393526
GRMZM2G108348_P03	0.0024505	-0.0351948	0.0325241	0.491186	0.528771	0.461005
GRMZM2G073498_P01	0.032383	-0.0542425	0.00992041	0.494467	0.581689	0.516721
GRMZM2G330772_P02	0.0378742	-0.0147911	-0.0317986	0.496718	0.551688	0.567448
GRMZM2G024647_P01	0.0193461	-0.0359341	0.0112094	0.496922	0.549916	0.50284
GRMZM2G094051_P03	-0.0326838	0.0482362	-0.00578235	0.497331	0.419107	0.470511
GRMZM2G035820_P01	-0.00708658	0.0565835	-0.0254707	0.499374	0.439889	0.51783
GRMZM2G447632_P01	0.0132121	-0.0121698	-0.000721528	0.503349	0.528671	0.517225
GRMZM2G396540_P01	0.0180644	-0.0254707	-0.0102797	0.503858	0.546364	0.531069
GRMZM2G049269_P01	0.0197731	-0.0266459	0.00690837	0.504163	0.550507	0.517024
GRMZM2G168898_P01	-0.0204868	-0.00520307	0.0173518	0.505383	0.487178	0.464773
GRMZM2G085661_P01	0.0143553	-0.19479	0.063779	0.506805	0.714927	0.457542
GRMZM2G027479_P01	-0.135745	0.0729976	0.0413832	0.506907	0.298072	0.329755
GRMZM2G443495_P05	0.0114956	-0.0619024	0.104739	0.508631	0.581014	0.415326
GRMZM2G181542_P01	-0.0452826	-0.0978878	0.0632268	0.508834	0.562768	0.401521
GRMZM2G090422_P01	0.0370307	-0.0319461	0.00389003	0.508834	0.575216	0.542109
GRMZM5G864424_P01	0.0485152	-0.0254707	-0.00245467	0.508834	0.582941	0.559834
GRMZM2G377797_P01	0.0350608	-0.0665784	0.0436245	0.509138	0.610889	0.500598
AC155610.2_FGP007	0.0139267	-0.0245899	0.0224743	0.50924	0.545079	0.498047
GRMZM2G436986_P01	0.0461418	-0.0199016	-0.0294408	0.510861	0.579856	0.586404
GRMZM2G039419_P01	-0.0317986	0.023894	0.00633393	0.511468	0.455649	0.470511
GRMZM2G394528_P02	0.00230647	-0.0204868	0.0227584	0.513086	0.533763	0.490467
GRMZM2G135654_P01	0.0683269	-0.0310614	-0.0178552	0.513996	0.613249	0.600079
GRMZM2G144387_P03	-0.059044	0.00848689	0.0206267	0.51541	0.450485	0.435629
GRMZM2G152686_P01	-0.0193166	0.0480967	-0.046176	0.516721	0.449429	0.543595
GRMZM2G142413_P01	0.0167816	-0.0353426	0.0219061	0.517024	0.572211	0.514804
GRMZM5G850455_P02	0.00317044	-0.0496062	0.0409625	0.522759	0.574538	0.48388
GRMZM2G180654_P02	-0.0365259	0.0142124	0.0183493	0.525267	0.473423	0.470407
GRMZM2G147849_P01	0.0251706	0.00906047	-0.0120243	0.525768	0.538935	0.562865
GRMZM2G139786_P01	-0.0365259	-0.0163953	0.0297002	0.526069	0.505891	0.459851
GRMZM2G408768_P01	0.0132121	0.054779	-0.0898814	0.528871	0.487383	0.635058
GRMZM5G870752_P01	0.0494914	-0.0738487	0.0164963	0.529171	0.65526	0.565207
GRMZM2G089421_P01	-0.0343081	-0.105163	0.126709	0.529671	0.601697	0.369829
GRMZM2G153823_P01	0.0130692	-0.0140625	0.00317044	0.537743	0.564915	0.547549
GRMZM2G060160_P01	-0.0767367	0.0204844	0.0647449	0.542407	0.443501	0.399226
GRMZM2G422750_P03	0.0119249	-0.0337172	0.032383	0.542506	0.585443	0.519341
GRMZM2G044027_P02	0.0213376	0.101919	-0.106715	0.542803	0.462681	0.667574
GRMZM2G084958_P01	-0.0112971	0.0284277	-0.0120243	0.543298	0.500598	0.54092
GRMZM5G868062_P04	0.00028851	-0.184097	0.170181	0.543298	0.728661	0.3744
GRMZM2G015603_P01	0.00805655	-0.0490091	0.00575927	0.547746	0.60483	0.550113
GRMZM2G139123_P01	-0.0150826	-0.0284105	0.0607392	0.549226	0.562768	0.470615
GRMZM2G452523_P01	-0.0322412	-0.00882739	0.0610158	0.550014	0.523361	0.455649
GRMZM2G125149_P01	-0.0272338	0.016211	0.0126402	0.550999	0.505078	0.508733
GRMZM2G043737_P01	0.0164963	-0.0158117	0.00374614	0.553459	0.588709	0.569199
GRMZM5G868433_P01	0.0119249	-0.0433485	0.0325241	0.553655	0.608998	0.53087
GRMZM2G028929_P02	-0.0105703	0.0531113	-0.0344558	0.556797	0.49293	0.580628
GRMZM2G127648_P01	-0.0584429	0.0226164	0.0316775	0.561008	0.479955	0.473631
GRMZM2G043279_P01	0.0196308	-0.0843644	0.0440443	0.565207	0.669208	0.540722
GRMZM2G134862_P01	-0.0315037	-0.0313562	0.0532504	0.566084	0.568421	0.481506
GRMZM2G100225_P01	-0.0150826	-0.00158784	0.0315364	0.568519	0.554933	0.524264
GRMZM2G053397_P01	-0.122963	-0.0433485	0.136979	0.573181	0.493647	0.3122
GRMZM2G178341_P01	-0.0237097	0.000576963	0.0295589	0.57628	0.551885	0.525969
GRMZM2G102356_P01	-0.0284105	-0.0168331	0.0316775	0.576377	0.564817	0.516318
GRMZM5G837058_P01	-0.12422	0.0415234	0.0415234	0.577634	0.411969	0.411969
GRMZM2G301908_P01	-0.00288828	0.0805212	-0.163591	0.584193	0.503552	0.746313
GRMZM2G126580_P01	0.0806577	-0.142576	0.0179219	0.58602	0.806943	0.649294
GRMZM2G164974_P01	-0.0159576	-0.011588	0.0209111	0.59827	0.593975	0.56472
GRMZM2G127948_P01	0.0373119	-0.000144277	-0.037562	0.606726	0.644133	0.684908
GRMZM2G071790_P05	-0.0569414	0.0190614	0.00791308	0.613249	0.537346	0.551196
GRMZM2G441347_P01	-0.00288828	0.0150693	-0.0147911	0.619084	0.604071	0.634222
GRMZM2G114642_P01	-0.0166871	0.0600474	-0.046325	0.621993	0.545178	0.653977
GRMZM2G005938_P01	-0.0118789	0.0124972	0.00475306	0.622556	0.595599	0.606821
GRMZM2G114706_P01	-0.0816138	-0.00245467	0.0551957	0.630499	0.551196	0.493545
GRMZM2G026371_P01	-0.046474	0.0199154	0.0186342	0.630778	0.56511	0.56267
GRMZM2G140809_P01	0.0219061	0.00460925	-0.0126064	0.634872	0.649478	0.666666
GRMZM2G010196_P01	0.0630887	-0.0257644	-0.0354905	0.635336	0.724301	0.737341
GRMZM2G078641_P01	-0.0616013	0.139862	-0.0325362	0.638398	0.437015	0.609282
GRMZM2G143883_P06	-0.136062	-0.00781166	0.0554733	0.649018	0.516923	0.453649
GRMZM2G145213_P01	0.016211	-0.0396366	0.0106366	0.65104	0.706995	0.656542
GRMZM5G803556_P01	-0.0433485	0.0244615	0.0114956	0.656176	0.587365	0.601411
GRMZM2G391627_P01	-0.131629	0.0519985	0.0306892	0.661476	0.477781	0.50019
GRMZM2G043127_P01	-0.105318	0.0567222	0.0154976	0.661841	0.501312	0.541118
GRMZM2G050501_P01	-0.258253	0.0375931	0.0984196	0.664847	0.36793	0.308244
GRMZM2G062481_P01	-0.000721528	-0.0972704	0.065848	0.668482	0.762306	0.599127
GRMZM2G158205_P01	0.124593	-0.0110064	-0.0437946	0.678703	0.814345	0.849279
GRMZM2G156068_P01	-0.0178552	0.0194884	0.0123541	0.681134	0.641084	0.648189
GRMZM2G062396_P01	-0.0874268	0.127237	-0.0127519	0.683741	0.469052	0.612966
GRMZM2G165357_P01	0.0326651	-0.0101344	-0.00766662	0.686075	0.728835	0.726395
GRMZM2G074604_P01	-0.00288828	-0.0184396	0.0280033	0.686792	0.702303	0.65581
GRMZM2G003501_P01	0.0272956	-0.00129901	-0.0193166	0.711319	0.739934	0.757877
GRMZM2G013082_P01	-0.0158117	-0.0350469	0.0926134	0.715015	0.735436	0.606726
GRMZM2G075701_P01	-0.220782	0.0855606	-0.00476877	0.715893	0.408494	0.498864
GRMZM2G350319_P02	-0.0420111	0.0146409	0.0119249	0.729183	0.673647	0.677711
GRMZM2G032315_P01	-0.048263	0.00776959	0.100036	0.782073	0.726046	0.637378
GRMZM2G128080_P02	-0.0295881	-0.0178552	0.0434845	0.793355	0.781737	0.720366
GRMZM2G164696_P01	-0.0388953	0.0943712	-0.0323887	0.839557	0.70496	0.831715
GRMZM2G075283_P01	-0.0169791	-0.021365	0.0210533	0.843502	0.850159	0.80554
GRMZM2G169458_P01	-0.00332202	-0.0315037	0.0110662	0.845751	0.873892	0.831391
AC217050.4_FGP006	-0.0136255	0.0433445	-0.00708658	0.86259	0.805623	0.856069
GRMZM2G039639_P01	-0.156981	0.0332292	0.100036	0.952408	0.762221	0.69537
GRMZM6G132224_P01	0.0743684	-0.0502036	-0.0518477	0.990447	1.11497	1.12022
GRMZM2G152908_P01	0.00748258	0.00532812	-0.00317743	1.00504	1.00727	1.01984
GRMZM2G160541_P02	0.00733905	0.0241778	0	1.04222	1.02304	1.04719
GRMZM5G898755_P01	0.0699771	-0.0326838	-0.0402298	1.07087	1.17607	1.18104
GRMZM2G009188_P01	-0.0409718	0.0017302	0.021764	1.14222	1.09606	1.07608
GRMZM2G075140_P01	-0.433623	0.106482	-0.0593446	1.16948	0.628167	0.794104
GRMZM2G035594_P01		-0.0499049	0.0271541		0.424062	0.347099
GRMZM2G107609_P01		-0.137172	0.192447		-0.313298	-0.642955
GRMZM2G014400_P01		0.0501882	-0.0542425		-0.503487	-0.395929
GRMZM2G091456_P01	0.176195	-0.123905	0.00877371		-0.251711	-0.385903
GRMZM2G025409_P01	-0.0357862	0.0240359		0.507921	0.446997
GRMZM2G149273_P01		0.0396999	-0.0868138		-0.657218	-0.532199
GRMZM2G145968_P01		0.0107798	0.0183493		-0.45502	-0.459576
GRMZM2G104983_P01	-0.00491352		0.00733905	0.560617		0.550507
GRMZM2G354053_P01		-0.0895743	0.101112		0.479127	0.286408
GRMZM2G140101_P01	-0.122491	0.10165		0.602172	0.377957
GRMZM2G331566_P02	-0.0215115	0.240498		0.498966	0.238542	1.13672

## Sheet: third leaf KR701 res
The log2 (fold change) of KR701-responsive proteins at third leaf stage. Each sample had three replicates.
Accession Number	third leaf stage
	KR701-log2FC-(-)-rep1	KR701-log2FC-(-)-rep2	KR701-log2FC-(-)-rep3	KR701-log2FC-(+)-rep1	KR701-log2FC-(+)-rep2	KR701-log2FC-(+)-rep3
GRMZM2G069911_P01	-0.027822	0.0147838	-0.00462403	-0.904278	-0.945082	-0.926591
GRMZM2G014695_P01	-0.0165412	-0.03934	0.0640551	-0.724039	-0.700404	-0.803897
GRMZM2G075502_P01	0.0186342	-0.0363779	0.0233263	-0.749523	-0.697125	-0.757062
GRMZM2G098460_P01	-0.075216	0.0688771	0.0154976	-0.334971	-0.480357	-0.427013
GRMZM2G103668_P01	-0.00665171	-0.0634092	0.0514417	-1.42546	-1.36662	-1.48116
GRMZM2G178645_P01	0.0200577	0.0318186	-0.102372	-1.3555	-1.36513	-1.23311
GRMZM2G037485_P01	-0.0180013	-0.0921864	0.0880059	-0.71052	-0.636436	-0.816545
GRMZM2G153208_P01	-0.0369699	0.0773797	-0.00839199	-0.697593	-0.811979	-0.726186
GRMZM2G073884_P01	0.00934717	-0.0193166	0.0319597	-0.678765	-0.650182	-0.701576
GRMZM2G453805_P01	0.0133551	0.00317044	-0.0244432	-0.572608	-0.562133	-0.537005
GRMZM2G168552_P01	0.0551957	-0.115597	0.0769695	-0.584025	-0.413115	-0.605815
GRMZM2G465226_P01	0.100574	0.132116	-0.193305	-0.662232	-0.693621	-0.371646
GRMZM2G053669_P01	-0.0216579	-0.023563	0.0471195	-0.478547	-0.476538	-0.54751
GRMZM2G113378_P01	-0.0653703	0.0663992	0.0404015	-0.435378	-0.56811	-0.543089
GRMZM2G088064_P03	-0.00781166	0.00317044	-0.0178552	-0.465341	-0.476338	-0.455416
GRMZM2G079348_P02	0.00877371	-0.0174171	-0.00607208	-0.46554	-0.439285	-0.450676
AC210204.3_FGP002	0.0492125	-0.0518477	0.00561557	-0.509841	-0.408704	-0.463549
GRMZM2G126062_P02	0.021764	-0.00926292	-0.00303285	-0.470329	-0.441047	-0.447131
GRMZM2G009025_P01	0.00920383	-0.100979	0.0751903	-0.46335	-0.352363	-0.528448
GRMZM2G137321_P01	-0.00708658	0.0190614	-0.0229766	-0.422366	-0.448902	-0.409087
GRMZM2G094990_P01	-0.0232698	-0.0426054	0.0611541	-0.412539	-0.393084	-0.496753
GRMZM2G064096_P01	-0.000721528	-0.0317986	0.0281448	-0.420627	-0.389489	-0.449493
GRMZM2G130053_P01	-0.0344558	-0.025177	0.0392788	-0.3893	-0.398399	-0.465341
GRMZM2G153920_P01	0.075738	-0.0613002	-0.000144277	-0.494109	-0.355129	-0.418119
GRMZM2G003762_P03	-0.053344	-0.0044793	0.0650208	-0.359009	-0.407938	-0.477542
GRMZM2G036708_P01	-0.011588	0.0174944	-0.0134798	-0.386657	-0.415615	-0.384772
AC209987.4_FGP010	-0.00476877	0.0180644	-0.0126064	-0.395359	-0.416	-0.387412
GRMZM2G026151_P01	-0.025177		0.0783366	-0.369781		-0.475334
GRMZM2G147279_P01	-0.103457	0.0244615	0.0742314	-0.287712	-0.414845	-0.464544
GRMZM2G014400_P01		0.0385767	-0.0573917		-0.404114	-0.310075
GRMZM2G070167_P01	-0.0635599	0.0201999	0.0482362	-0.309717	-0.393842	-0.423913
GRMZM2G063431_P01	-0.193635	0.0840643	-0.0635599	-0.789861	-1.06764	-0.919479
GRMZM2G018716_P01	0.0353424	-0.272994	0.0404015	-0.981651	-0.672313	-0.986502
GRMZM2G168115_P01	-0.0665784	0.0399806		-0.666576	-0.771274
GRMZM2G099467_P01	-0.0998964	0.142348	-0.046474	-0.611314	-0.85517	-0.664517
GRMZM2G057159_P02	-0.0380063	-0.0527453	0.0683269	-0.644533	-0.629947	-0.749766
GRMZM2G115660_P01	-0.0291463	0.0683269	0.0411028	-0.605815	-0.703454	-0.678765
GRMZM2G057674_P02	-0.0303245	0.116099	-0.0531943	-0.629278	-0.77769	-0.607573
GRMZM2G041356_P01	0.0392788	-0.0415656	0.013498	-0.581216	-0.501239	-0.558729
GRMZM2G353276_P01	-0.00534787	-0.0259113	0.0457225	-0.522841	-0.504509	-0.575185
GRMZM2G138770_P01	-0.0868138	0.0508847	0.0754642	-0.411195	-0.550676	-0.573467
GRMZM2G028516_P02	-0.0554414	0.0489336	-0.00578235	-0.422946	-0.52533	-0.470529
GRMZM2G135722_P01	-0.0231232	-0.107492	0.0496308	-0.43733	-0.350522	-0.508403
GRMZM2G028129_P01		-0.000721528	-0.025177		-0.480559	-0.456009
AC209898.2_FGP004	0.146916	-0.0518477	-0.0357862	-0.610653	-0.412731	-0.42876
GRMZM2G154881_P01	-0.0226834	0.0399806	-0.00708658	-0.433818	-0.496346	-0.449296
AC152495.1_FGP002	-0.0647666	-0.00621696	0.0356239	-0.367732	-0.426238	-0.465938
GRMZM2G044383_P01	0.08882	-0.0334219	-0.0903421	-0.523255	-0.39935	-0.344099
GRMZM2G099191_P01	0.0169241	0.0160684		-0.411004	-0.410045
GRMZM2G090595_P01	-0.0282633	-0.00969858	0.0583858	-0.380822	-0.400492	-0.468531
GRMZM2G051943_P01	0.012068	0.0200577	-0.0165412	-0.411771	-0.416577	-0.383078
GRMZM5G801949_P02	0.0640551	-0.0525957	-0.0124608	-0.467134	-0.350522	-0.390812
GRMZM2G120587_P01	-0.02283	-0.0174171	0.0526941	-0.37258	-0.380258	-0.450282
GRMZM2G081782_P01		0.0388576	-0.0668806		-0.426625	-0.320846
GRMZM2G122937_P03	0.00891709	-0.0136255	0.00446544	0.432639	0.455123	0.437015
GRMZM2G062076_P02	0.0714881	-0.131787	0.00647756	0.414677	0.617769	0.477781
GRMZM5G898755_P01	0.0519985	-0.0150826	-0.0691491	0.533763	0.598937	0.655718
GRMZM2G027479_P01	-0.070815	0.0432045	-0.0537932	0.734135	0.616734	0.713784
GRMZM2G010868_P01	0.0503276	-0.0384508	0.0024505	0.719665	0.805045	0.764091
GRMZM2G403007_P01	-0.0126064	0.113167	-0.209728	0.832039	0.707613	1.02913
GRMZM2G011523_P01	0.0694272	-0.0561912	0.0203422	0.870976	0.999351	0.920141
GRMZM2G014577_P01	-0.0206331	0.104873	-0.0551416	0.40305	0.278698	0.438612
GRMZM2G004699_P01	0.0216219	-0.00520307	-0.0123153	0.356144	0.383055	0.390227
GRMZM2G107731_P01	-0.00332202	0.159371	-0.0288519	0.378401	0.217727	0.406101
GRMZM2G456603_P01	-0.062053	0.0192037	0.0275787	0.438932	0.355693	0.347325
GRMZM2G136453_P01	-0.00418989	0.00100953	-0.011588	0.392427	0.387252	0.403486
GRMZM5G826979_P01	0.0285692	0.0143553	-0.0241497	0.356933	0.373175	0.411752
GRMZM5G870752_P01	-0.00882739	-0.0429026	0.0464212	0.39594	0.429964	0.34301
GRMZM2G002786_P01	0.0553345	-0.0572415	-0.00332202	0.33754	0.449957	0.396488
GRMZM2G070863_P01	0.0754642	0.0182069	-0.0396366	0.316262	0.37362	0.431463
GRMZM2G162840_P01	0.110363	-0.0475173	-0.207561	0.271187	0.428035	0.587941
GRMZM2G314769_P01	-0.00361125	0.0139267	-0.0107156	0.390117	0.372618	0.399335
GRMZM2G109130_P01	0.00590296	-0.0131886	0.00302648	0.397474	0.412836	0.396708
GRMZM2G154523_P01	-0.00563751	-0.00737657	0.00302648	0.401849	0.406101	0.393087
GRMZM2G112488_P01	0.00690837	0.000432744	-0.011588	0.392867	0.402286	0.411318
GRMZM2G156861_P01	0.0970714	-0.0743043	-0.0356383	0.312897	0.486045	0.445727
GRMZM2G068755_P01	0.066537	-0.0297353		0.349026	0.446574
GRMZM2G160541_P02	-0.0146453	0.0329472	0.00676478	0.430928	0.383386	0.409472
GRMZM2G325575_P01	0.104873	-0.0898814	0.0116388	0.327917	0.525267	0.421156
GRMZM2G163421_P01	-0.00505829	-0.0193166	0.033793	0.444879	0.461214	0.408277
GRMZM2G171588_P01	-0.0301772	0.054779	-0.0319461	0.466758	0.381837	0.470823
GRMZM2G118362_P01	-0.215412	0.0133551	0.28404	0.662114	0.434455	0.163241
GRMZM2G139786_P01	-0.0443896	-0.00636186	0.0568609	0.503349	0.462681	0.399445
GRMZM2G173809_P01	-0.0107156	0.0467006	-0.040675	0.469573	0.414244	0.501617
GRMZM2G137329_P01	0.0129262	-0.0946491	0.0669502	0.445197	0.554638	0.391218
GRMZM2G156632_P01	0.0316775	-0.0123153	-0.00969858	0.462366	0.504264	0.501617
GRMZM2G140101_P01	0.00676478	-0.00578235		0.495388	0.505891
GRMZM2G112524_P02	-0.0201941	-0.037414	0.042084	0.521855	0.539035	0.459537
GRMZM2G350319_P02	0.0574156	0.0366088	-0.0390435	0.437867	0.459537	0.534161
AC217499.3_FGP003	-0.0294408	0.00475306	0.0220482	0.52687	0.492725	0.477263
GRMZM2G060567_P01	0.0236102	-0.0180013	-0.00173227	0.488515	0.527971	0.51167
GRMZM2G063287_P01	0.0848807	-0.00245467	-0.0894208	0.447421	0.534062	0.620962
GRMZM2G447785_P02	0.0179219	-0.0223904	0.0203422	0.523361	0.566084	0.523462
GRMZM2G154725_P01	0.024887	-0.0238564	0.00331439	0.509442	0.55817	0.53097
AC148152.3_FGP005	-0.0699061	-0.00737657	0.0513025	0.62882	0.565987	0.50518
GRMZM2G122584_P01	0.0278618	-0.0723311	0.0207689	0.515006	0.615228	0.522156
GRMZM2G042032_P02	0.0270125	-0.0628063	0.0180644	0.529771	0.617675	0.536849
GRMZM2G114552_P04	0.0261627	-0.00259919	-0.0225369	0.539829	0.56589	0.585828
GRMZM2G355752_P01	0.0776532	-0.0354905	-0.024003	0.520749	0.630405	0.61899
GRMZM2G095147_P02	0.0370307	-0.27073	0.0536674	0.588709	0.897473	0.573471
GRMZM2G083253_P02	-0.0496062	0.0299829	-0.017271	0.724476	0.642933	0.690194
GRMZM2G134806_P01	0.013498	0.00302648	0.00432161	0.682304	0.692874	0.688762
GRMZM2G145280_P01	-0.0253239	0.0426443	0.0153548	0.733875	0.665938	0.693141
GRMZM2G101958_P01	0.000432744	-0.080393	0.0483757	0.710085	0.793688	0.662297
GRMZM2G142413_P01	0.0137838	-0.0237097	0.0143553	0.718877	0.75634	0.720979
GRMZM2G000236_P01	0.0291348	-0.0528949	0.00805655	0.346078	0.428142	0.369606
GRMZM2G459811_P01	0.0430645	-0.0536434	-0.00129901	0.339137	0.434134	0.381837
GRMZM2G025832_P01	0.00992041	0.028852	-0.0150826	0.380064	0.360083	0.405012
GRMZM2G009030_P01	-0.0661253	-0.0761282	0.0931545	0.461319	0.470198	0.301002
GRMZM2G105364_P01	0.0437644	-0.0799354	0.0423642	0.34551	0.468427	0.346078
GRMZM2G447632_P01	-0.0194628	-0.0323887	0.0382957	0.418244	0.429107	0.358396
GRMZM2G140832_P01	0.0102069	-0.0219508	0.0147838	0.383718	0.416624	0.379843
GRMZM2G162688_P01	0.018919	0.0147838	-0.0191704	0.396927	0.401084	0.435095
GRMZM2G107839_P01	-0.0209258	-0.00578235	0.0113525	0.443076	0.428035	0.410884
GRMZM2G059039_P01	0.113834	-0.101598	-0.0184396	0.310224	0.523963	0.442545
GRMZM2G022054_P05	0.0659858	0.0352016	-0.046623	0.36087	0.392098	0.471135
GRMZM2G033653_P01	-0.0162494	0.0113525	-0.0247367	0.457647	0.430071	0.466236
GRMZM2G445958_P01	0.064469	0.0432045	-0.0768889	0.382391	0.40163	0.523361
GRMZM2G087079_P01	0.0190614	-0.0390435	0.0237521	0.439357	0.497434	0.437015
GRMZM2G703555_P01	-0.0216579	0.0371713	-0.00650678	0.494774	0.43776	0.479541
GRMZM2G140893_P01	0.107956	-0.0298826	-0.168933	0.375735	0.51248	0.6515
AC215244.3_FGP002	-0.0165412	0.0370307	-0.013043	0.531668	0.475915	0.525969
GRMZM2G103197_P01	-0.0387471	0.030548	0.00992041	0.567059	0.49774	0.520447
GRMZM2G446960_P01	-0.0505024	0.0206267	0.0278618	0.580821	0.509747	0.502432
GRMZM2G043336_P01	0.015783	-0.0747601	0.0735461	0.534659	0.62527	0.47892
GRMZM2G359018_P01	-0.0218044	0.000432744	0.00776959	0.596649	0.57415	0.566084
GRMZM2G172274_P01	-0.0718761	0.0433445	0.00690837	0.65764	0.542506	0.576764
GRMZM2G429955_P01	-0.0331266	0.0739573		0.658828	0.55562	0.796598
GRMZM2G098237_P01	0.0304067	-0.161976	0.0501882	0.604736	0.798921	0.586501
GRMZM2G004768_P01	0.104202	0.0270125	-0.168123	0.681224	0.758388	0.953526
GRMZM2G112805_P01	-0.070815	0.0399806	-0.00737657	0.91976	0.80892	0.859174
GRMZM2G096475_P01	0.0485152	-0.125951	0.052555	0.802152	0.976437	0.798507

## Sheet: third leaf hei8834 res
The log2 (fold change) of hei8834-responsive proteins at third leaf stage. Each sample had three replicates.
Accession Number	third leaf stage
	hei8834-log2FC-(-)-rep1	hei8834-log2FC-(-)-rep2	hei8834-log2FC-(-)-rep3	hei8834-log2FC-(+)-rep1	hei8834-log2FC-(+)-rep2	hei8834-log2FC-(+)-rep3
GRMZM2G069911_P01	-0.0105703	0.00748258	0.00590296	-0.54414	-0.56043	-0.559792
GRMZM2G014695_P01	-0.000865877	-0.0254707	0.0184917	-0.641154	-0.615729	-0.659723
GRMZM2G075502_P01	0.0152121	0.0311128	-0.0437946	-0.449493	-0.467334	-0.392516
GRMZM2G098460_P01	-0.126896	0.102725	0.0136409	-0.351258	-0.58208	-0.493093
GRMZM2G122937_P03	-0.0266459	0.0443242	-0.0254707	-0.387034	-0.45799	-0.390245
GRMZM2G062076_P02	-0.0540927	0.15004	-0.0328314	-0.347399	-0.551522	-0.366987
GRMZM2G317451_P01	0.042084	-0.125321	0.0494914	-0.519735	-0.352363	-0.5272
GRMZM2G172491_P01	0.0280033	-0.0403782	0.0112094	-0.422559	-0.354206	-0.403733
GRMZM2G022958_P01	-0.00216567	-0.017125	0.0152121	-0.372767	-0.357714	-0.390056
GRMZM2G010973_P01	-0.00303285	-0.000144277	-0.0081018	-0.47313	-0.476137	-0.468132
GRMZM2G111200_P01	0.0553345	-0.0665784	0.0113525	-0.464146	-0.342086	-0.420048
GRMZM2G137816_P01	0.0219061	0.101516	-0.062957	-0.412923	-0.490659	-0.328073
GRMZM2G165919_P01	0.0388576	-0.0875801	0.00776959	-0.512308	-0.385714	-0.480357
GRMZM2G153184_P01	0.0608775	-0.0153742	-0.0332742	-0.494719	-0.468132	-0.450282
GRMZM2G136306_P01	-0.0158117	-0.00839199	0.0282862	-0.443988	-0.451465	-0.488026
GRMZM2G158039_P02	0.0285692	0.0359054	-0.0682413	-0.473931	-0.479553	-0.375384
GRMZM2G126763_P01	-0.00868224	0.0104934	-0.0178552	-0.538471	-0.558304	-0.530114
GRMZM2G096247_P01	-0.0310614	-0.0200478	0.0621217	-0.4243	-0.435183	-0.517461
GRMZM5G809292_P02	0.026021	-0.00115462	-0.0356383	-0.436744	-0.411771	-0.375197
GRMZM2G117558_P01	-0.000432873	0.0486547	-0.0264989	-0.4243	-0.47333	-0.398208
GRMZM2G079908_P01	-0.0549917	0.0684645	0.0200577	-0.364942	-0.487824	-0.439872
GRMZM2G180654_P02	-0.00694161	-0.123277	0.0977456	-0.442026	-0.326263	-0.546667
GRMZM2G344634_P01	-0.030914	0.0439044	0.00158609	-0.409278	-0.484187	-0.439872
GRMZM2G075839_P01	-0.0497556	-0.0118789	0.059909	-0.368849	-0.406598	-0.477743
AC234171.1_FGP003	0.0094905	-0.0273809	0.026446	-0.39973	-0.361046	-0.415807
GRMZM2G021617_P01	0.0432045	-0.00578235	-0.0319461	-0.447328	-0.387978	-0.372206
GRMZM2G132000_P03	0.0306892	0.0149265	-0.0499049	-0.411579	-0.395739	-0.332607
GRMZM2G316665_P01	0.0173518	-0.00897255	-0.0110064	-0.440263	-0.413884	-0.411771
GRMZM2G013652_P01	-0.0187318	0.0261627	-0.00636186	-0.388355	-0.433234	-0.400682
GRMZM2G436986_P01	0.0153548	-0.0269398	0.00129784	-0.434988	-0.390434	-0.42082
GRMZM2G408768_P01	0.00934717	0.00705194	-0.0244432	-0.487015	-0.48217	-0.45107
GRMZM2G100225_P01	0.0396999	-0.0396366	-0.0152284	-0.444969	-0.367546	-0.391948
GRMZM2G032315_P01	-0.037562	0.0309716	0.00877371	-0.3629	-0.429537	-0.409278
GRMZM2G150791_P01	-0.0952654	0.054779	0.0113525	-0.306323	-0.456207	-0.412923
GRMZM2G010196_P01	-0.0273809	0.00590296	0.0137838	-0.355682	-0.388733	-0.394221
GRMZM5G898755_P01	0.100574	0.0506062	-0.126896	0.562768	0.610795	0.788352
GRMZM2G027479_P01	0.0822938	-0.0394883	-0.0484122	0.285461	0.407298	0.416191
GRMZM2G010868_P01	0.00647756	0.015783	-0.0250302	0.534958	0.525768	0.566572
GRMZM2G403007_P01	-0.0140625	0.0628125	-0.150081	0.754888	0.67726	0.890875
GRMZM2G011523_P01	0.0226164	-0.00781166	-0.00911773	0.398022	0.428464	0.429429
GRMZM2G043878_P01	0.0265876	0.000865357	-0.040675	0.352081	0.380064	0.42191
GRMZM2G125032_P01	0.0506062	-0.0315037	0.0405418	0.342327	0.422771	0.351515
GRMZM2G162353_P03	0.0418037	0.00934717	-0.0446872	0.342213	0.375623	0.429643
GRMZM2G331566_P02	0.165558	-0.105318	-0.237354	0.343806	0.616169	0.749062
GRMZM2G450498_P01	0.0133551	0.00273852	-0.0146453	0.403595	0.414136	0.431463
GRMZM2G075283_P01	-0.0969617	0.0751903	-0.00505829	0.799087	0.626953	0.70726
