# Supplementary material for: Comparative Proteomics Combined with Morphophysiological Analysis Revealed Chilling Response Patterns in Two Contrasting Maize Genotypes
Source: Cells. 2022 Apr 13;11(8):1321. doi: 10.3390/cells11081321 (PMC9024610; doi:10.3390/cells11081321)
Supplement: Supplementary file 1 [file cells-11-01321-s001.zip › Table S7.xlsx]

## Sheet: first leaf res
Supplemental Table S7
Distribution of responsive proteins at first leaf stage in proteomics.
Accession Number	KR701 and hei8834 overlap res				Accession Number	KR701-specific res			Accession Number	hei8834-specific res
	FC-KR701-(+)/(-)	FC-hei8834-(+)/(-)				FC-KR701-(+)/(-)				FC-hei8834-(+)/(-)
GRMZM2G445602_P01	1.31951	1.32869			GRMZM2G047486_P01	1.31039			GRMZM2G036708_P01	0.742262
GRMZM2G075701_P01	1.32869	1.42405			GRMZM2G155111_P01	1.31951			GRMZM2G080375_P01	0.768438
GRMZM2G168898_P01	1.34723	1.39474			GRMZM2G112524_P02	1.34723			GRMZM2G025171_P01	1.30134
GRMZM2G180399_P01	1.40444	1.31039			GRMZM2G112488_P01	1.3566			GRMZM2G144730_P01	1.30134
GRMZM2G114642_P01	1.41421	1.52626			GRMZM2G132461_P02	1.37554			GRMZM2G134256_P01	1.34723
GRMZM5G850455_P02	1.43396	1.44393			GRMZM2G034848_P01	1.40444			GRMZM2G089365_P01	1.3566
GRMZM2G010868_P01	1.44393	1.37554			GRMZM2G348909_P01	1.42405			AC194341.4_FGP002	1.36604
GRMZM2G152686_P01	1.45397	1.41421			GRMZM2G173128_P01	1.45397			GRMZM2G156068_P01	1.58008
GRMZM2G181542_P01	1.45397	1.37554			GRMZM2G163641_P01	1.45397			GRMZM2G149273_P01	0.650671
GRMZM2G003501_P01	1.58008	1.67018			GRMZM2G107839_P01	1.45397			GRMZM2G162359_P01	0.732043
GRMZM2G109130_P01	1.61328	1.31039			GRMZM2G009030_P01	1.48452			GRMZM2G099454_P02	0.768438
GRMZM2G062481_P01	1.65864	1.55833			GRMZM2G329047_P01	0.646176			GRMZM2G168364_P01	1.30134
GRMZM5G898755_P01	1.84038	2.20381			GRMZM2G174984_P01	0.673617			GRMZM2G087326_P01	1.31039
GRMZM2G156861_P02	2.01391	1.32869			GRMZM5G874448_P01	0.673617			GRMZM2G018241_P01	1.31951
GRMZM2G003762_P03	0.692555	0.697372			GRMZM2G016622_P02	0.697372			GRMZM2G110145_P01	1.31951
GRMZM2G365160_P01	1.34723	1.32869			GRMZM2G010349_P02	0.697372			GRMZM2G108123_P01	1.32869
GRMZM2G159369_P01	1.36604	1.38511			GRMZM2G059191_P01	0.707107			GRMZM2G027862_P01	1.32869
GRMZM2G128171_P03	1.36604	1.33793			GRMZM2G337113_P02	0.712025			GRMZM2G142097_P02	1.37554
GRMZM5G807835_P01	1.36604	1.33793			GRMZM5G856777_P01	0.726986			GRMZM2G445905_P03	1.37554
GRMZM2G119219_P03	1.38511	1.31951			GRMZM2G306732_P01	0.742262			GRMZM2G027723_P01	1.37554
GRMZM2G452523_P01	1.39474	1.42405			GRMZM2G025882_P01	0.742262			GRMZM2G331566_P02	1.39474
GRMZM2G042502_P01	1.39474	1.34723			GRMZM2G377855_P01	0.757858			GRMZM2G063431_P01	0.486327
GRMZM2G101875_P01	1.41421	1.44393			GRMZM2G429955_P01	1.64718			GRMZM2G123896_P04	0.496546
GRMZM2G441347_P01	1.60214	1.53688			GRMZM2G103668_P01	0.570382			GRMZM2G081114_P01	0.594604
GRMZM2G160541_P02	1.61328	2.07053			GRMZM2G178645_P01	0.641713			GRMZM2G062076_P02	0.594604
GRMZM2G074604_P01	1.72907	1.61328			GRMZM2G086763_P01	0.650671			GRMZM2G047002_P01	0.607097
GRMZM2G075140_P01	2.05623	1.65864			GRMZM2G101117_P01	0.668964			GRMZM2G317451_P01	0.664343
GRMZM2G014695_P01	0.463294	0.646176			GRMZM2G394500_P01	0.68302			GRMZM2G031501_P05	0.673617
GRMZM2G075502_P01	0.476319	0.510506			GRMZM2G139300_P01	0.697372			GRMZM2G154725_P01	0.678302
AC209898.2_FGP004	0.496546	0.482968			GRMZM2G337242_P01	0.702222			GRMZM2G034764_P01	0.68302
GRMZM2G070011_P01	0.578344	0.68302			GRMZM2G133434_P01	0.712025			GRMZM2G122337_P01	0.687771
GRMZM2G104481_P01	0.607097	0.712025			GRMZM2G114588_P01	0.732043			GRMZM2G000219_P01	0.687771
GRMZM2G139643_P01	0.615572	0.692555			GRMZM5G805485_P01	0.732043			GRMZM2G480850_P01	0.692555
GRMZM2G134846_P01	0.619854	0.716978			GRMZM2G112337_P02	0.737135			GRMZM2G113349_P01	0.697372
GRMZM5G855347_P02	0.624165	0.632878			GRMZM2G064096_P01	0.737135			GRMZM2G339091_P01	0.702222
GRMZM2G168552_P01	0.624165	0.624165			GRMZM2G361064_P01	0.742262			GRMZM2G168590_P01	0.702222
GRMZM2G014902_P01	0.641713	0.562529			GRMZM2G120587_P01	0.742262			GRMZM2G099191_P01	0.702222
GRMZM2G069911_P01	0.655197	0.632878			GRMZM2G024391_P01	0.742262			GRMZM2G130904_P01	0.707107
GRMZM2G175401_P01	0.659754	0.528509			GRMZM2G073861_P03	0.742262			GRMZM2G410757_P01	0.712025
GRMZM2G130053_P01	0.692555	0.607097			GRMZM2G087918_P01	0.747425			GRMZM2G014400_P01	0.716978
GRMZM2G079759_P01	0.702222	0.702222			GRMZM2G018716_P01	0.752623			GRMZM2G399183_P01	0.716978
GRMZM2G094990_P01	0.707107	0.692555			GRMZM2G137648_P01	0.752623			GRMZM2G110504_P01	0.721965
GRMZM2G090595_P01	0.712025	0.76313			GRMZM2G102737_P01	0.752623			GRMZM2G064518_P01	0.726986
GRMZM2G167356_P02	0.712025	0.732043			GRMZM2G047592_P02	0.752623			GRMZM2G107609_P01	0.726986
GRMZM2G070167_P01	0.712025	0.607097			GRMZM2G320399_P01	0.752623			GRMZM2G013342_P01	0.726986
GRMZM2G057186_P01	0.721965	0.768438			GRMZM2G353276_P01	0.757858			GRMZM2G049349_P01	0.726986
GRMZM2G175989_P01	0.721965	0.76313			AC231745.1_FGP003	0.757858			GRMZM2G378121_P01	0.726986
GRMZM2G091456_P01	0.726986	0.768438			GRMZM2G017419_P01	0.757858			GRMZM2G096695_P01	0.732043
GRMZM6G397851_P01	0.726986	0.664343			GRMZM5G801949_P02	0.757858			GRMZM2G174699_P01	0.732043
AC197758.3_FGP004	0.732043	0.712025			GRMZM2G026980_P01	0.76313			GRMZM2G118037_P01	0.732043
GRMZM5G875238_P01	0.737135	0.752623			GRMZM2G122853_P01	0.76313			GRMZM2G152105_P03	0.737135
GRMZM2G147279_P01	0.742262	0.732043			GRMZM2G038973_P01	0.76313			GRMZM2G010044_P01	0.737135
GRMZM2G126261_P01	0.742262	0.687771			GRMZM2G034302_P01	0.76313			GRMZM2G145968_P01	0.737135
GRMZM2G175562_P02	0.747425	0.712025			GRMZM2G148090_P02	0.76313			GRMZM2G021687_P01	0.737135
GRMZM2G071450_P01	0.752623	0.61132			GRMZM2G161306_P01	0.76313			GRMZM2G472693_P02	0.742262
GRMZM2G147849_P01	1.30134	1.46409			GRMZM2G081583_P02	0.76313			GRMZM2G059392_P02	0.742262
GRMZM2G110023_P01	1.30134	1.39474			GRMZM5G845611_P01	0.76313			AC234522.1_FGP005	0.742262
GRMZM2G053397_P01	1.30134	1.3566			GRMZM2G170400_P01	0.768438			GRMZM2G106928_P01	0.742262
GRMZM2G005980_P01	1.30134	1.31951			GRMZM2G038281_P02	0.768438			GRMZM2G076544_P01	0.742262
GRMZM2G060561_P02	1.30134	1.31951			GRMZM2G059129_P01	0.768438			GRMZM6G101378_P01	0.747425
GRMZM2G110233_P01	1.30134	1.31039			GRMZM2G100747_P01	0.768438			GRMZM2G068271_P01	0.752623
GRMZM2G004699_P01	1.30134	1.30134			GRMZM2G009025_P01	0.768438			GRMZM2G127361_P01	0.752623
GRMZM2G157018_P01	1.31039	1.43396			GRMZM2G047093_P01	1.30134			GRMZM2G130586_P01	0.752623
GRMZM2G031545_P02	1.31039	1.39474			GRMZM2G134230_P01	1.30134			GRMZM2G481261_P01	0.752623
GRMZM2G141707_P01	1.31039	1.38511			GRMZM2G079196_P01	1.30134			GRMZM2G174708_P01	0.757858
GRMZM2G094051_P03	1.31039	1.38511			GRMZM2G131943_P03	1.30134			GRMZM2G162748_P01	0.757858
GRMZM2G071360_P01	1.31039	1.33793			GRMZM2G177812_P01	1.30134			GRMZM2G042032_P02	0.757858
GRMZM2G060947_P01	1.31039	1.32869			GRMZM2G078933_P01	1.30134			GRMZM2G055704_P01	0.76313
GRMZM2G134862_P01	1.31951	1.45397			GRMZM2G077596_P01	1.30134			GRMZM2G009320_P02	0.76313
GRMZM2G443495_P05	1.31951	1.43396			GRMZM2G003853_P01	1.30134			GRMZM2G167758_P01	0.76313
GRMZM2G098239_P01	1.31951	1.39474			GRMZM2G059039_P01	1.30134			GRMZM2G135904_P02	0.76313
GRMZM2G165944_P01	1.31951	1.37554			GRMZM2G134176_P01	1.30134			GRMZM2G336879_P01	0.768438
GRMZM2G144387_P03	1.31951	1.37554			GRMZM2G165815_P02	1.30134			GRMZM2G063896_P01	1.30134
GRMZM2G021567_P01	1.31951	1.3566			GRMZM2G165966_P01	1.30134			GRMZM2G100260_P02	1.30134
GRMZM2G445057_P03	1.31951	1.32869			GRMZM5G884242_P04	1.30134			GRMZM2G070899_P02	1.30134
GRMZM2G010801_P02	1.31951	1.31039			GRMZM2G108087_P01	1.31039			GRMZM2G035594_P01	1.30134
GRMZM2G126580_P01	1.32869	1.59107			AC203985.4_FGP005	1.31039			GRMZM2G000660_P01	1.30134
GRMZM2G137961_P01	1.32869	1.43396			GRMZM5G825854_P01	1.31039			GRMZM5G820727_P06	1.30134
GRMZM2G035477_P01	1.32869	1.42405			GRMZM2G109967_P02	1.31039			GRMZM5G883149_P03	1.30134
GRMZM2G081144_P01	1.32869	1.36604			GRMZM2G136513_P01	1.31039			GRMZM5G819807_P01	1.30134
GRMZM2G009464_P01	1.32869	1.32869			GRMZM2G042639_P04	1.31039			GRMZM2G033680_P01	1.30134
GRMZM2G059449_P01	1.32869	1.31951			GRMZM2G093405_P06	1.31039			GRMZM2G053319_P01	1.30134
GRMZM2G408768_P01	1.33793	1.46409			GRMZM2G098212_P01	1.31039			GRMZM2G363540_P01	1.30134
GRMZM2G001514_P01	1.33793	1.39474			GRMZM2G157384_P01	1.31039			GRMZM2G084757_P01	1.30134
GRMZM2G403007_P01	1.33793	1.38511			GRMZM2G171484_P01	1.31039			GRMZM2G302233_P01	1.30134
GRMZM2G044629_P01	1.33793	1.33793			GRMZM2G452633_P01	1.31039			GRMZM2G446960_P01	1.30134
GRMZM2G050501_P01	1.33793	1.32869			GRMZM2G157729_P01	1.31039			GRMZM2G052078_P02	1.30134
GRMZM2G051677_P01	1.33793	1.32869			GRMZM2G344634_P01	1.31039			GRMZM2G359331_P01	1.30134
GRMZM6G639283_P01	1.33793	1.30134			GRMZM2G000326_P02	1.31039			GRMZM2G336815_P01	1.30134
GRMZM2G301908_P01	1.34723	1.49485			GRMZM2G149281_P01	1.31951			GRMZM2G077708_P01	1.30134
GRMZM2G178807_P01	1.34723	1.3566			AC205703.4_FGP006	1.31951			GRMZM2G175272_P01	1.30134
GRMZM2G017269_P01	1.34723	1.34723			GRMZM2G308687_P01	1.31951			GRMZM2G176612_P02	1.30134
GRMZM2G058057_P01	1.34723	1.30134			GRMZM2G014076_P01	1.31951			GRMZM2G063806_P01	1.30134
GRMZM2G123714_P01	1.3566	1.36604			GRMZM2G002786_P01	1.31951			GRMZM2G147726_P01	1.31039
GRMZM2G028986_P01	1.3566	1.34723			GRMZM2G388892_P01	1.31951			GRMZM5G850904_P01	1.31039
GRMZM2G105712_P06	1.3566	1.33793			GRMZM2G063756_P01	1.31951			GRMZM2G060842_P01	1.31039
GRMZM2G430600_P02	1.3566	1.32869			GRMZM2G096962_P02	1.31951			GRMZM2G459291_P01	1.31039
GRMZM2G304362_P01	1.3566	1.32869			GRMZM2G439950_P02	1.31951			GRMZM2G107082_P01	1.31039
GRMZM2G397759_P01	1.3566	1.31039			GRMZM2G334899_P01	1.31951			GRMZM2G172932_P03	1.31039
GRMZM2G371375_P01	1.3566	1.30134			GRMZM2G137352_P01	1.31951			GRMZM5G802566_P06	1.31039
GRMZM2G152466_P01	1.3566	1.30134			GRMZM2G115245_P01	1.31951			GRMZM2G064640_P01	1.31039
GRMZM2G128080_P02	1.36604	1.69349			GRMZM2G026147_P03	1.31951			GRMZM2G011491_P01	1.31039
GRMZM2G115615_P01	1.36604	1.42405			GRMZM5G876285_P02	1.31951			GRMZM2G354053_P01	1.31039
GRMZM2G128564_P01	1.36604	1.32869			GRMZM2G019251_P02	1.31951			GRMZM2G553687_P01	1.31039
GRMZM2G139874_P01	1.36604	1.31039			GRMZM2G107872_P02	1.31951			GRMZM2G403797_P01	1.31039
GRMZM2G023242_P04	1.36604	1.31039			GRMZM2G054136_P09	1.32869			GRMZM2G035557_P01	1.31039
GRMZM2G408305_P02	1.37554	1.30134			GRMZM2G072911_P01	1.32869			GRMZM2G150030_P01	1.31039
GRMZM2G043737_P01	1.38511	1.48452			GRMZM2G140342_P01	1.32869			GRMZM2G013798_P01	1.31951
GRMZM2G330635_P01	1.38511	1.43396			GRMZM2G136680_P01	1.32869			GRMZM2G060886_P02	1.31951
GRMZM2G145175_P02	1.38511	1.37554			GRMZM2G119773_P01	1.32869			GRMZM2G032266_P01	1.31951
GRMZM2G071518_P01	1.38511	1.36604			GRMZM2G121456_P01	1.32869			GRMZM2G442057_P01	1.31951
GRMZM2G043336_P01	1.38511	1.32869			GRMZM2G159250_P01	1.32869			GRMZM2G163325_P01	1.31951
GRMZM2G042683_P01	1.38511	1.30134			GRMZM2G063850_P01	1.32869			GRMZM2G012031_P01	1.31951
GRMZM2G465169_P02	1.38511	1.30134			GRMZM5G868757_P04	1.33793			GRMZM5G800853_P01	1.31951
GRMZM2G350319_P02	1.39474	1.61328			GRMZM2G006006_P01	1.33793			GRMZM2G028883_P01	1.32869
GRMZM2G026371_P01	1.39474	1.50525			GRMZM2G042008_P01	1.33793			GRMZM2G415491_P01	1.32869
GRMZM2G116427_P01	1.39474	1.33793			GRMZM2G094595_P03	1.33793			GRMZM2G014577_P01	1.32869
GRMZM2G155329_P01	1.39474	1.31951			GRMZM2G063340_P04	1.33793			GRMZM2G163227_P01	1.32869
GRMZM2G123624_P01	1.39474	1.31039			GRMZM2G075839_P01	1.33793			GRMZM2G053652_P02	1.32869
GRMZM2G124963_P01	1.39474	1.30134			GRMZM2G110567_P01	1.33793			GRMZM2G101004_P01	1.32869
GRMZM2G158205_P01	1.40444	1.75321			AC217499.3_FGP003	1.33793			GRMZM2G100146_P01	1.32869
GRMZM5G868433_P01	1.40444	1.47427			GRMZM2G157564_P02	1.34723			GRMZM2G125032_P01	1.32869
GRMZM2G127648_P01	1.40444	1.42405			GRMZM5G807767_P03	1.34723			GRMZM2G063909_P03	1.32869
GRMZM2G043291_P02	1.40444	1.33793			GRMZM5G826979_P01	1.34723			GRMZM2G013461_P01	1.32869
GRMZM2G134398_P02	1.40444	1.33793			GRMZM2G033653_P01	1.34723			GRMZM2G148200_P01	1.32869
GRMZM2G702426_P01	1.40444	1.32869			GRMZM6G007923_P01	1.34723			GRMZM2G127756_P01	1.32869
GRMZM5G864424_P01	1.41421	1.47427			GRMZM2G110726_P01	1.34723			GRMZM2G005886_P01	1.32869
GRMZM2G098496_P02	1.41421	1.37554			AC215244.3_FGP002	1.34723			GRMZM2G148769_P02	1.32869
GRMZM2G157296_P01	1.41421	1.34723			GRMZM2G011219_P01	1.3566			GRMZM2G061096_P01	1.32869
GRMZM2G100225_P01	1.42405	1.46409			GRMZM2G121683_P01	1.3566			GRMZM5G809292_P02	1.33793
GRMZM2G049269_P01	1.42405	1.44393			GRMZM2G102903_P02	1.3566			GRMZM5G811749_P01	1.33793
GRMZM2G396540_P01	1.42405	1.43396			GRMZM2G361569_P01	1.3566			GRMZM2G054765_P01	1.33793
GRMZM2G140545_P01	1.42405	1.36604			GRMZM2G439201_P02	1.3566			GRMZM2G029396_P01	1.33793
GRMZM2G438386_P01	1.42405	1.31039			GRMZM2G054123_P04	1.3566			GRMZM2G124732_P01	1.33793
GRMZM2G178341_P01	1.43396	1.47427			GRMZM2G162688_P01	1.3566			GRMZM2G071745_P02	1.33793
GRMZM2G028929_P02	1.43396	1.46409			GRMZM2G123940_P01	1.3566			GRMZM2G064993_P01	1.33793
GRMZM2G146246_P02	1.43396	1.40444			GRMZM2G004768_P01	1.3566			GRMZM2G062210_P01	1.33793
GRMZM2G032315_P01	1.44393	1.65864			GRMZM2G091481_P01	1.36604			GRMZM2G439457_P02	1.33793
GRMZM2G005938_P01	1.44393	1.52626			GRMZM2G306104_P01	1.36604			GRMZM2G061912_P01	1.33793
GRMZM2G089713_P07	1.44393	1.31951			GRMZM2G150697_P01	1.36604			GRMZM2G095534_P04	1.33793
GRMZM2G127963_P01	1.45397	1.31951			GRMZM2G075655_P01	1.36604			GRMZM2G146475_P01	1.34723
GRMZM2G062396_P01	1.46409	1.50525			GRMZM2G117707_P02	1.36604			GRMZM5G844628_P01	1.34723
GRMZM2G071790_P05	1.46409	1.47427			GRMZM2G084149_P01	1.36604			GRMZM2G101900_P02	1.34723
GRMZM2G044027_P02	1.46409	1.45397			GRMZM2G324886_P01	1.36604			GRMZM2G051403_P01	1.34723
GRMZM2G118362_P01	1.46409	1.37554			GRMZM6G617209_P01	1.36604			GRMZM2G116053_P01	1.34723
GRMZM2G090500_P01	1.46409	1.34723			GRMZM2G039089_P03	1.36604			GRMZM2G027021_P01	1.34723
AC197246.3_FGP001	1.46409	1.33793			GRMZM2G071089_P01	1.36604			GRMZM2G061950_P01	1.34723
GRMZM2G102356_P01	1.47427	1.46409			GRMZM2G102183_P02	1.36604			GRMZM2G139550_P02	1.34723
GRMZM5G868062_P04	1.47427	1.46409			GRMZM2G096247_P01	1.37554			GRMZM6G741620_P02	1.34723
AC155610.2_FGP007	1.47427	1.43396			GRMZM2G043903_P02	1.37554			GRMZM2G151414_P02	1.34723
GRMZM2G391627_P01	1.48452	1.44393			GRMZM2G445958_P01	1.37554			GRMZM2G029933_P01	1.34723
GRMZM2G139123_P01	1.48452	1.44393			GRMZM6G810942_P01	1.37554			GRMZM2G112535_P01	1.3566
GRMZM2G180654_P02	1.48452	1.40444			GRMZM2G166767_P02	1.37554			GRMZM2G464328_P01	1.3566
GRMZM2G138527_P01	1.48452	1.34723			GRMZM2G070863_P01	1.37554			GRMZM2G124239_P01	1.3566
GRMZM2G359018_P01	1.48452	1.33793			GRMZM2G024159_P02	1.37554			GRMZM2G027728_P01	1.3566
GRMZM2G153823_P01	1.49485	1.47427			GRMZM2G103197_P01	1.37554			GRMZM2G156673_P01	1.3566
GRMZM2G447632_P01	1.49485	1.43396			GRMZM2G171588_P01	1.37554			GRMZM2G168330_P02	1.3566
GRMZM2G101446_P01	1.49485	1.37554			GRMZM5G803318_P03	1.37554			GRMZM2G146951_P01	1.3566
GRMZM2G021794_P01	1.51572	1.30134			GRMZM2G143627_P02	1.38511			GRMZM2G072080_P01	1.3566
GRMZM2G078641_P01	1.53688	1.45397			GRMZM2G171452_P01	1.38511			GRMZM2G428168_P01	1.3566
GRMZM2G142413_P01	1.56917	1.44393			GRMZM2G070716_P02	1.38511			GRMZM2G325019_P01	1.3566
GRMZM2G027479_P01	1.56917	1.3566			GRMZM2G014750_P01	1.38511			GRMZM2G060870_P02	1.3566
GRMZM2G015603_P01	1.58008	1.46409			GRMZM2G016836_P01	1.38511			GRMZM2G086636_P01	1.3566
GRMZM2G140809_P01	1.59107	1.56917			GRMZM2G149317_P01	1.38511			GRMZM2G003384_P01	1.36604
GRMZM2G115766_P01	1.6245	1.45397			GRMZM2G124317_P01	1.38511			GRMZM2G084942_P02	1.36604
GRMZM2G139786_P01	1.6245	1.40444			GRMZM2G089836_P01	1.38511			GRMZM2G060160_P01	1.36604
GRMZM2G084958_P01	1.6358	1.44393			GRMZM2G024099_P01	1.38511			GRMZM2G006229_P02	1.36604
GRMZM2G063287_P01	1.6358	1.36604			GRMZM2G320521_P01	1.39474			GRMZM2G024310_P01	1.36604
GRMZM2G085661_P01	1.65864	1.43396			GRMZM2G009479_P01	1.39474			GRMZM2G132093_P01	1.37554
GRMZM2G164696_P01	1.67018	1.7411			GRMZM2G174906_P02	1.39474			GRMZM2G107588_P01	1.37554
GRMZM2G127948_P01	1.69349	1.56917			GRMZM2G438551_P02	1.39474			GRMZM2G027451_P04	1.37554
GRMZM2G165357_P01	1.7411	1.64718			AC199526.5_FGP002	1.39474			GRMZM2G079777_P01	1.37554
GRMZM2G013082_P01	1.7411	1.6245			GRMZM2G106690_P01	1.39474			GRMZM2G171060_P02	1.37554
GRMZM2G169458_P01	1.82766	1.8025			GRMZM2G011523_P01	1.40444			GRMZM5G837058_P01	1.37554
AC217050.4_FGP006	1.87905	1.8025			GRMZM2G093272_P01	1.40444			GRMZM2G044684_P01	1.37554
GRMZM2G075283_P01	1.87905	1.77769			GRMZM2G059965_P01	1.40444			GRMZM2G153208_P01	1.38511
GRMZM6G132224_P01	1.93187	2.15846			AC177850.2_FGP005	1.41421			GRMZM2G063511_P01	1.38511
GRMZM2G152908_P01	1.93187	2.01391			GRMZM2G017957_P02	1.41421			GRMZM2G115901_P01	1.38511
GRMZM2G010196_P01	1.95884	1.61328			GRMZM2G119705_P01	1.41421			GRMZM2G150791_P01	1.38511
GRMZM2G009188_P01	2.12874	2.14355			GRMZM2G134806_P01	1.42405			GRMZM2G144155_P01	1.38511
					GRMZM2G097021_P01	1.43396			GRMZM2G023748_P01	1.39474
					GRMZM2G172274_P01	1.43396			GRMZM2G078985_P01	1.39474
					GRMZM2G149422_P01	1.43396			GRMZM2G025409_P01	1.39474
					GRMZM2G152417_P01	1.44393			GRMZM2G039419_P01	1.39474
					GRMZM2G096475_P01	1.44393			GRMZM2G140101_P01	1.39474
					GRMZM5G856966_P01	1.44393			GRMZM2G074267_P01	1.39474
					GRMZM2G016890_P01	1.45397			GRMZM2G380457_P01	1.40444
					GRMZM2G066860_P03	1.45397			GRMZM2G111713_P01	1.40444
					GRMZM2G005493_P01	1.45397			GRMZM2G143791_P01	1.40444
					GRMZM2G382673_P01	1.45397			GRMZM2G009136_P01	1.40444
					GRMZM2G161506_P01	1.45397			GRMZM2G075333_P01	1.40444
					GRMZM2G156632_P01	1.45397			GRMZM2G035820_P01	1.40444
					GRMZM2G167549_P03	1.45397			GRMZM2G114888_P02	1.40444
					GRMZM2G325575_P01	1.46409			GRMZM2G038536_P01	1.41421
					GRMZM5G866082_P02	1.47427			AC209257.4_FGP008	1.41421
					GRMZM2G129761_P01	1.47427			GRMZM2G089421_P01	1.41421
					GRMZM2G051943_P01	1.47427			GRMZM2G108348_P03	1.41421
					GRMZM2G450498_P01	1.47427			GRMZM2G122805_P01	1.41421
					GRMZM2G083253_P02	1.51572			GRMZM2G179703_P02	1.42405
					GRMZM2G163421_P01	1.51572			GRMZM2G143883_P06	1.42405
					GRMZM2G360021_P01	1.51572			GRMZM2G024647_P01	1.43396
					GRMZM2G125268_P01	1.52626			GRMZM2G024811_P01	1.43396
					GRMZM6G910222_P01	1.52626			GRMZM2G394528_P02	1.43396
					GRMZM2G098237_P01	1.53688			GRMZM2G125149_P01	1.43396
					GRMZM2G145280_P01	1.54756			GRMZM2G056252_P01	1.44393
					GRMZM2G114552_P04	1.56917			GRMZM2G073498_P01	1.44393
					GRMZM2G053669_P01	1.56917			GRMZM2G314679_P04	1.44393
					GRMZM2G384338_P01	1.6245			GRMZM2G330772_P02	1.44393
					GRMZM2G112805_P01	1.6245			GRMZM2G164821_P01	1.45397
					GRMZM2G126682_P01	1.71713			GRMZM2G043127_P01	1.46409
					GRMZM2G106424_P01	1.75321			GRMZM2G377797_P01	1.46409
					GRMZM2G154523_P01	1.79005			GRMZM2G090422_P01	1.46409
					AC148152.3_FGP005	1.82766			GRMZM2G422750_P03	1.46409
					GRMZM2G355752_P01	1.85318			GRMZM2G068471_P01	1.46409
									GRMZM2G114706_P01	1.46409
									GRMZM2G436986_P01	1.47427
									GRMZM2G104983_P01	1.47427
									GRMZM2G164974_P01	1.49485
									GRMZM5G870752_P01	1.49485
									GRMZM2G135654_P01	1.50525
									GRMZM2G043279_P01	1.50525
									GRMZM5G803556_P01	1.52626
									GRMZM2G145213_P01	1.59107
									GRMZM2G039639_P01	1.75321

## Sheet: third leaf res
Distribution of responsive proteins at third leaf stage in proteomics.
Accession Number	KR701 and hei8834 overlap res				Accession Number	KR701-specific res			Accession Number	hei8834-specific res
	FC-KR701-(+)/(-)	FC-hei8834-(+)/(-)				FC-KR701-(+)/(-)				FC-hei8834-(+)/(-)
GRMZM2G011523_P01	1.90528	1.33793			GRMZM2G140893_P01	1.39474			GRMZM2G021617_P01	0.757858
GRMZM2G010868_P01	1.70527	1.46409			GRMZM2G004699_P01	1.30134			GRMZM5G809292_P02	0.752623
GRMZM5G898755_P01	1.50525	1.60214			GRMZM2G051943_P01	0.757858			GRMZM2G436986_P01	0.747425
GRMZM2G403007_P01	1.76541	1.67018			GRMZM2G009025_P01	0.732043			GRMZM2G153184_P01	0.721965
GRMZM2G027479_P01	1.69349	1.36604			GRMZM2G353276_P01	0.692555			GRMZM2G075283_P01	1.6245
GRMZM2G062076_P02	1.40444	0.757858			GRMZM2G103668_P01	0.373712			GRMZM2G331566_P02	1.44393
GRMZM2G122937_P03	1.3566	0.752623			GRMZM2G096475_P01	1.8025			GRMZM2G450498_P01	1.33793
GRMZM2G014695_P01	0.598739	0.641713			GRMZM2G112805_P01	1.79005			GRMZM2G162353_P03	1.31039
GRMZM2G075502_P01	0.607097	0.742262			GRMZM2G142413_P01	1.67018			GRMZM2G125032_P01	1.31039
GRMZM2G069911_P01	0.524858	0.68302			GRMZM2G101958_P01	1.64718			GRMZM2G043878_P01	1.30134
GRMZM2G098460_P01	0.747425	0.707107			GRMZM2G145280_P01	1.6358			GRMZM2G010196_P01	0.768438
					GRMZM2G004768_P01	1.61328			GRMZM2G132000_P03	0.768438
					GRMZM2G134806_P01	1.61328			GRMZM2G022958_P01	0.768438
					GRMZM2G083253_P02	1.60214			GRMZM2G032315_P01	0.76313
					GRMZM2G098237_P01	1.58008			AC234171.1_FGP003	0.76313
					GRMZM2G095147_P02	1.54756			GRMZM2G172491_P01	0.76313
					GRMZM2G429955_P01	1.51572			GRMZM2G150791_P01	0.757858
					GRMZM2G355752_P01	1.50525			GRMZM2G100225_P01	0.757858
					GRMZM2G172274_P01	1.50525			GRMZM2G137816_P01	0.757858
					GRMZM2G359018_P01	1.48452			GRMZM2G013652_P01	0.752623
					GRMZM2G114552_P04	1.47427			GRMZM2G111200_P01	0.752623
					AC148152.3_FGP005	1.46409			GRMZM2G316665_P01	0.747425
					GRMZM2G043336_P01	1.46409			GRMZM2G075839_P01	0.747425
					GRMZM2G122584_P01	1.46409			GRMZM2G079908_P01	0.747425
					GRMZM2G042032_P02	1.46409			GRMZM2G117558_P01	0.747425
					GRMZM2G447785_P02	1.45397			GRMZM2G344634_P01	0.737135
					GRMZM2G154725_P01	1.45397			GRMZM2G180654_P02	0.737135
					GRMZM2G103197_P01	1.44393			GRMZM2G158039_P02	0.737135
					GRMZM2G446960_P01	1.44393			GRMZM2G096247_P01	0.726986
					GRMZM2G063287_P01	1.43396			GRMZM2G136306_P01	0.726986
					AC215244.3_FGP002	1.42405			GRMZM2G408768_P01	0.721965
					GRMZM2G060567_P01	1.42405			GRMZM2G165919_P01	0.721965
					GRMZM2G140101_P01	1.41421			GRMZM2G010973_P01	0.716978
					GRMZM2G112524_P02	1.41421			GRMZM2G317451_P01	0.707107
					GRMZM2G350319_P02	1.41421			GRMZM2G126763_P01	0.68302
					AC217499.3_FGP003	1.41421
					GRMZM2G156632_P01	1.40444
					GRMZM2G703555_P01	1.38511
					GRMZM2G173809_P01	1.37554
					GRMZM2G137329_P01	1.37554
					GRMZM2G087079_P01	1.37554
					GRMZM2G139786_P01	1.37554
					GRMZM2G118362_P01	1.36604
					GRMZM2G445958_P01	1.36604
					GRMZM2G171588_P01	1.3566
					GRMZM2G033653_P01	1.3566
					GRMZM2G163421_P01	1.3566
					GRMZM2G325575_P01	1.34723
					GRMZM2G022054_P05	1.34723
					GRMZM2G068755_P01	1.33793
					GRMZM2G107839_P01	1.33793
					GRMZM2G059039_P01	1.33793
					GRMZM2G162688_P01	1.33793
					GRMZM2G160541_P02	1.33793
					GRMZM2G156861_P01	1.32869
					GRMZM2G112488_P01	1.32869
					GRMZM2G154523_P01	1.31951
					GRMZM2G109130_P01	1.31951
					GRMZM2G140832_P01	1.31951
					GRMZM2G447632_P01	1.31951
					GRMZM2G314769_P01	1.31039
					GRMZM2G105364_P01	1.31039
					GRMZM5G826979_P01	1.31039
					GRMZM2G009030_P01	1.31039
					GRMZM2G136453_P01	1.31039
					GRMZM2G025832_P01	1.31039
					GRMZM5G870752_P01	1.31039
					GRMZM2G070863_P01	1.31039
					GRMZM2G002786_P01	1.31039
					GRMZM2G162840_P01	1.31039
					GRMZM2G000236_P01	1.30134
					GRMZM2G459811_P01	1.30134
					GRMZM2G107731_P01	1.30134
					GRMZM2G014577_P01	1.30134
					GRMZM2G456603_P01	1.30134
					GRMZM2G081782_P01	0.768438
					GRMZM2G070167_P01	0.768438
					GRMZM2G014400_P01	0.768438
					GRMZM2G120587_P01	0.76313
					GRMZM2G026151_P01	0.76313
					GRMZM2G147279_P01	0.76313
					GRMZM5G801949_P02	0.757858
					AC209987.4_FGP010	0.757858
					GRMZM2G036708_P01	0.757858
					GRMZM2G090595_P01	0.752623
					GRMZM2G003762_P03	0.752623
					GRMZM2G153920_P01	0.747425
					GRMZM2G099191_P01	0.747425
					GRMZM2G064096_P01	0.747425
					GRMZM2G130053_P01	0.747425
					GRMZM2G044383_P01	0.742262
					AC152495.1_FGP002	0.742262
					GRMZM2G137321_P01	0.742262
					GRMZM2G094990_P01	0.742262
					AC210204.3_FGP002	0.732043
					GRMZM2G126062_P02	0.732043
					GRMZM2G079348_P02	0.726986
					GRMZM2G154881_P01	0.726986
					GRMZM2G088064_P03	0.721965
					AC209898.2_FGP004	0.721965
					GRMZM2G028129_P01	0.716978
					GRMZM2G028516_P02	0.716978
					GRMZM2G135722_P01	0.716978
					GRMZM2G113378_P01	0.707107
					GRMZM2G053669_P01	0.707107
					GRMZM2G138770_P01	0.707107
					GRMZM2G465226_P01	0.692555
					GRMZM2G168552_P01	0.692555
					GRMZM2G041356_P01	0.687771
					GRMZM2G453805_P01	0.678302
					GRMZM2G057674_P02	0.646176
					GRMZM2G115660_P01	0.641713
					GRMZM2G073884_P01	0.628507
					GRMZM2G057159_P02	0.624165
					GRMZM2G099467_P01	0.607097
					GRMZM2G153208_P01	0.602904
					GRMZM2G037485_P01	0.602904
					GRMZM2G168115_P01	0.598739
					GRMZM2G018716_P01	0.532185
					GRMZM2G063431_P01	0.496546
					GRMZM2G178645_P01	0.395021

## Sheet: first leaf overlap res
GO enrichment analysis of chilling tolerant line KR701- and chilling sensitive line hei8834-overlap responsive proteins at first leaf stage.
GO.ID	GO.Name	GO.Category	P.Value	Nr.Test	Nr.Reference	Non.Annot.Test	Non.Annot.Reference	SeqTest
GO:0031640	killing of cells of other organism	BP	0.0487764	1	1	179	7109	GRMZM6G397851_P01
GO:0001906	cell killing	BP	0.0487764	1	1	179	7109	GRMZM6G397851_P01
GO:0044364	disruption of cells of other organism	BP	0.0487764	1	1	179	7109	GRMZM6G397851_P01
GO:0005985	sucrose metabolic process	BP	0.0141938	3	18	177	7092	GRMZM5G875238_P01, GRMZM2G089713_P07, GRMZM2G152908_P01
GO:0016157	sucrose synthase activity	MF	0.00156323	3	7	177	7103	GRMZM5G875238_P01, GRMZM2G089713_P07, GRMZM2G152908_P01
GO:0003735	structural constituent of ribosome	MF	0.0350741	11	229	169	6881	GRMZM5G868433_P01, GRMZM2G702426_P01, GRMZM2G100225_P01, GRMZM2G144387_P03, GRMZM2G043737_P01, GRMZM2G126580_P01, GRMZM2G178341_P01, GRMZM2G105712_P06, GRMZM2G178807_P01, GRMZM2G032315_P01, GRMZM2G094051_P03
GO:0000463	maturation of LSU-rRNA from tricistronic rRNA transcript (SSU-rRNA, 5.8S rRNA, LSU-rRNA)	BP	4.57977e-07	5	3	175	7107	GRMZM5G868433_P01, GRMZM2G178807_P01, GRMZM2G100225_P01, GRMZM2G050501_P01, GRMZM2G094051_P03
GO:0002181	cytoplasmic translation	BP	0.00317367	6	53	174	7057	GRMZM5G868433_P01, GRMZM2G105712_P06, GRMZM2G178807_P01, GRMZM2G100225_P01, GRMZM2G032315_P01, GRMZM2G094051_P03
GO:0034660	ncRNA metabolic process	BP	0.0341764	11	228	169	6882	GRMZM5G868433_P01, GRMZM2G100225_P01, GRMZM5G868062_P04, GRMZM2G144387_P03, GRMZM2G050501_P01, GRMZM2G178807_P01, GRMZM2G141707_P01, GRMZM2G110233_P01, GRMZM2G139123_P01, GRMZM2G094051_P03, GRMZM2G005938_P01
GO:0034470	ncRNA processing	BP	0.0190763	8	128	172	6982	GRMZM5G868433_P01, GRMZM2G100225_P01, GRMZM5G868062_P04, GRMZM2G144387_P03, GRMZM2G050501_P01, GRMZM2G178807_P01, GRMZM2G110233_P01, GRMZM2G094051_P03
GO:0016072	rRNA metabolic process	BP	0.00141089	8	80	172	7030	GRMZM5G868433_P01, GRMZM2G100225_P01, GRMZM5G868062_P04, GRMZM2G144387_P03, GRMZM2G050501_P01, GRMZM2G178807_P01, GRMZM2G110233_P01, GRMZM2G094051_P03
GO:0006364	rRNA processing	BP	0.00130971	8	79	172	7031	GRMZM5G868433_P01, GRMZM2G100225_P01, GRMZM5G868062_P04, GRMZM2G144387_P03, GRMZM2G050501_P01, GRMZM2G178807_P01, GRMZM2G110233_P01, GRMZM2G094051_P03
GO:0042273	ribosomal large subunit biogenesis	BP	4.66023e-05	7	33	173	7077	GRMZM5G868433_P01, GRMZM2G100225_P01, GRMZM5G868062_P04, GRMZM2G144387_P03, GRMZM2G050501_P01, GRMZM2G178807_P01, GRMZM2G094051_P03
GO:0000470	maturation of LSU-rRNA	BP	1.25981e-07	7	11	173	7099	GRMZM5G868433_P01, GRMZM2G100225_P01, GRMZM5G868062_P04, GRMZM2G144387_P03, GRMZM2G050501_P01, GRMZM2G178807_P01, GRMZM2G094051_P03
GO:0022613	ribonucleoprotein complex biogenesis	BP	0.0268525	10	191	170	6919	GRMZM5G868433_P01, GRMZM2G100225_P01, GRMZM5G868062_P04, GRMZM2G144387_P03, GRMZM2G050501_P01, GRMZM2G043737_P01, GRMZM2G178341_P01, GRMZM2G178807_P01, GRMZM2G110233_P01, GRMZM2G094051_P03
GO:0042254	ribosome biogenesis	BP	0.00261162	10	132	170	6978	GRMZM5G868433_P01, GRMZM2G100225_P01, GRMZM5G868062_P04, GRMZM2G144387_P03, GRMZM2G050501_P01, GRMZM2G043737_P01, GRMZM2G178341_P01, GRMZM2G178807_P01, GRMZM2G110233_P01, GRMZM2G094051_P03
GO:0005198	structural molecule activity	MF	0.00406486	16	294	164	6816	GRMZM5G868433_P01, GRMZM2G028929_P02, GRMZM2G043737_P01, GRMZM2G178341_P01, GRMZM2G164696_P01, GRMZM2G032315_P01, GRMZM2G094051_P03, GRMZM2G071790_P05, GRMZM2G702426_P01, GRMZM2G100225_P01, GRMZM2G144387_P03, GRMZM2G126580_P01, GRMZM2G105712_P06, GRMZM2G178807_P01, GRMZM2G152466_P01, GRMZM2G071518_P01
GO:1901576	organic substance biosynthetic process	BP	0.0324924	55	1720	125	5390	GRMZM5G868062_P04, GRMZM2G155329_P01, GRMZM2G062396_P01, GRMZM2G032315_P01, GRMZM2G304362_P01, GRMZM2G031545_P02, GRMZM2G021567_P01, GRMZM2G051677_P01, GRMZM5G807835_P01, GRMZM2G168898_P01, GRMZM2G044629_P01, GRMZM2G178807_P01, GRMZM2G141707_P01, GRMZM2G159369_P01, GRMZM2G128171_P03, GRMZM2G139123_P01, GRMZM2G180399_P01, GRMZM2G101875_P01, GRMZM2G074604_P01, GRMZM2G178341_P01, GRMZM2G094051_P03, …
GO:0009058	biosynthetic process	BP	0.0092454	60	1787	120	5323	GRMZM5G868062_P04, GRMZM2G085661_P01, GRMZM2G155329_P01, GRMZM2G062396_P01, GRMZM2G032315_P01, GRMZM2G304362_P01, GRMZM2G139874_P01, GRMZM2G031545_P02, GRMZM2G021567_P01, GRMZM2G051677_P01, GRMZM5G807835_P01, GRMZM2G168898_P01, GRMZM2G044629_P01, GRMZM2G178807_P01, GRMZM2G141707_P01, GRMZM2G159369_P01, GRMZM2G128171_P03, GRMZM2G139123_P01, GRMZM2G180399_P01, GRMZM2G101875_P01, GRMZM2G074604_P01, …
GO:0006869	lipid transport	BP	0.0401132	3	28	177	7082	GRMZM5G850455_P02, GRMZM5G898755_P01, GRMZM2G010868_P01
GO:0010876	lipid localization	BP	0.0401132	3	28	177	7082	GRMZM5G850455_P02, GRMZM5G898755_P01, GRMZM2G010868_P01
GO:0042559	pteridine-containing compound biosynthetic process	BP	0.0288032	2	9	178	7101	GRMZM5G807835_P01, GRMZM2G139123_P01
GO:0030272	5-formyltetrahydrofolate cyclo-ligase activity	MF	0.0246914	1	0	179	7110	GRMZM5G807835_P01
GO:0006768	biotin metabolic process	BP	0.0487764	1	1	179	7109	GRMZM2G452523_P01
GO:0009102	biotin biosynthetic process	BP	0.0487764	1	1	179	7109	GRMZM2G452523_P01
GO:0004076	biotin synthase activity	MF	0.0246914	1	0	179	7110	GRMZM2G452523_P01
GO:0046364	monosaccharide biosynthetic process	BP	0.0434837	3	29	177	7081	GRMZM2G408305_P02, GRMZM2G128171_P03, GRMZM2G159369_P01
GO:0019319	hexose biosynthetic process	BP	0.0253658	3	23	177	7087	GRMZM2G408305_P02, GRMZM2G128171_P03, GRMZM2G159369_P01
GO:0006094	gluconeogenesis	BP	0.0253658	3	23	177	7087	GRMZM2G408305_P02, GRMZM2G128171_P03, GRMZM2G159369_P01
GO:0061731	ribonucleoside-diphosphate reductase activity	MF	0.0246914	1	0	179	7110	GRMZM2G304362_P01
GO:0016728	oxidoreductase activity, acting on CH or CH2 groups, disulfide as acceptor	MF	0.0246914	1	0	179	7110	GRMZM2G304362_P01
GO:0004748	ribonucleoside-diphosphate reductase activity, thioredoxin disulfide as acceptor	MF	0.0246914	1	0	179	7110	GRMZM2G304362_P01
GO:0006952	defense response	BP	0.00506325	11	170	169	6940	GRMZM2G180399_P01, GRMZM2G101875_P01, GRMZM6G397851_P01, GRMZM2G075283_P01, GRMZM2G027479_P01, GRMZM2G102356_P01, GRMZM2G109130_P01, GRMZM2G141707_P01, GRMZM2G159369_P01, GRMZM2G128171_P03, GRMZM2G156861_P02
GO:0032787	monocarboxylic acid metabolic process	BP	0.00066769	22	400	158	6710	GRMZM2G180399_P01, GRMZM2G003501_P01, GRMZM2G101875_P01, GRMZM2G062481_P01, GRMZM2G074604_P01, GRMZM2G114642_P01, GRMZM2G003762_P03, GRMZM2G152686_P01, GRMZM2G156861_P02, GRMZM2G181542_P01, GRMZM2G441347_P01, GRMZM2G075140_P01, GRMZM2G445602_P01, GRMZM2G160541_P02, GRMZM2G109130_P01, GRMZM2G365160_P01, GRMZM2G168898_P01, GRMZM2G042502_P01, GRMZM2G119219_P03, GRMZM2G159369_P01, GRMZM2G128171_P03, …
GO:0044283	small molecule biosynthetic process	BP	0.00162277	23	458	157	6652	GRMZM2G180399_P01, GRMZM2G003501_P01, GRMZM2G062481_P01, GRMZM2G074604_P01, GRMZM2G114642_P01, GRMZM2G003762_P03, GRMZM2G408305_P02, GRMZM2G152686_P01, GRMZM2G156861_P02, GRMZM2G181542_P01, GRMZM2G441347_P01, GRMZM2G075140_P01, GRMZM2G445602_P01, GRMZM2G160541_P02, GRMZM2G109130_P01, GRMZM5G807835_P01, GRMZM2G365160_P01, GRMZM2G042502_P01, GRMZM2G119219_P03, GRMZM2G159369_P01, GRMZM2G128171_P03, …
GO:0016053	organic acid biosynthetic process	BP	0.000604611	21	370	159	6740	GRMZM2G180399_P01, GRMZM2G003501_P01, GRMZM2G062481_P01, GRMZM2G074604_P01, GRMZM2G114642_P01, GRMZM2G003762_P03, GRMZM2G152686_P01, GRMZM2G156861_P02, GRMZM2G181542_P01, GRMZM2G441347_P01, GRMZM2G075140_P01, GRMZM2G445602_P01, GRMZM2G160541_P02, GRMZM2G109130_P01, GRMZM5G807835_P01, GRMZM2G365160_P01, GRMZM2G042502_P01, GRMZM2G119219_P03, GRMZM2G159369_P01, GRMZM2G128171_P03, GRMZM2G452523_P01
GO:0046394	carboxylic acid biosynthetic process	BP	0.000604611	21	370	159	6740	GRMZM2G180399_P01, GRMZM2G003501_P01, GRMZM2G062481_P01, GRMZM2G074604_P01, GRMZM2G114642_P01, GRMZM2G003762_P03, GRMZM2G152686_P01, GRMZM2G156861_P02, GRMZM2G181542_P01, GRMZM2G441347_P01, GRMZM2G075140_P01, GRMZM2G445602_P01, GRMZM2G160541_P02, GRMZM2G109130_P01, GRMZM5G807835_P01, GRMZM2G365160_P01, GRMZM2G042502_P01, GRMZM2G119219_P03, GRMZM2G159369_P01, GRMZM2G128171_P03, GRMZM2G452523_P01
GO:0072330	monocarboxylic acid biosynthetic process	BP	3.49742e-07	20	198	160	6912	GRMZM2G180399_P01, GRMZM2G003501_P01, GRMZM2G062481_P01, GRMZM2G074604_P01, GRMZM2G114642_P01, GRMZM2G003762_P03, GRMZM2G152686_P01, GRMZM2G156861_P02, GRMZM2G181542_P01, GRMZM2G441347_P01, GRMZM2G075140_P01, GRMZM2G445602_P01, GRMZM2G160541_P02, GRMZM2G109130_P01, GRMZM2G365160_P01, GRMZM2G042502_P01, GRMZM2G119219_P03, GRMZM2G159369_P01, GRMZM2G128171_P03, GRMZM2G452523_P01
GO:0045300	acyl-[acyl-carrier-protein] desaturase activity	MF	0.0487764	1	1	179	7109	GRMZM2G180399_P01
GO:0042549	photosystem II stabilization	BP	0.0487764	1	1	179	7109	GRMZM2G175562_P02
GO:0015671	oxygen transport	BP	0.0246914	1	0	179	7110	GRMZM2G168898_P01
GO:0015669	gas transport	BP	0.0246914	1	0	179	7110	GRMZM2G168898_P01
GO:0019825	oxygen binding	MF	0.0246914	1	0	179	7110	GRMZM2G168898_P01
GO:0008460	dTDP-glucose 4,6-dehydratase activity	MF	0.00577276	2	3	178	7107	GRMZM2G165357_P01, GRMZM2G044027_P02
GO:0048040	UDP-glucuronate decarboxylase activity	MF	0.00178946	2	1	178	7109	GRMZM2G165357_P01, GRMZM2G044027_P02
GO:0009800	cinnamic acid biosynthetic process	BP	0.000142752	3	2	177	7108	GRMZM2G160541_P02, GRMZM2G074604_P01, GRMZM2G441347_P01
GO:0009803	cinnamic acid metabolic process	BP	0.000142752	3	2	177	7108	GRMZM2G160541_P02, GRMZM2G074604_P01, GRMZM2G441347_P01
GO:0042537	benzene-containing compound metabolic process	BP	0.0308391	3	25	177	7085	GRMZM2G160541_P02, GRMZM2G074604_P01, GRMZM2G441347_P01
GO:0009074	aromatic amino acid family catabolic process	BP	0.00276333	3	9	177	7101	GRMZM2G160541_P02, GRMZM2G074604_P01, GRMZM2G441347_P01
GO:1902221	erythrose 4-phosphate/phosphoenolpyruvate family amino acid metabolic process	BP	0.00111442	3	6	177	7104	GRMZM2G160541_P02, GRMZM2G074604_P01, GRMZM2G441347_P01
GO:0006558	L-phenylalanine metabolic process	BP	0.00111442	3	6	177	7104	GRMZM2G160541_P02, GRMZM2G074604_P01, GRMZM2G441347_P01
GO:1902222	erythrose 4-phosphate/phosphoenolpyruvate family amino acid catabolic process	BP	0.000481644	3	4	177	7106	GRMZM2G160541_P02, GRMZM2G074604_P01, GRMZM2G441347_P01
GO:0006559	L-phenylalanine catabolic process	BP	0.000481644	3	4	177	7106	GRMZM2G160541_P02, GRMZM2G074604_P01, GRMZM2G441347_P01
GO:0016840	carbon-nitrogen lyase activity	MF	0.00654111	3	13	177	7097	GRMZM2G160541_P02, GRMZM2G074604_P01, GRMZM2G441347_P01
GO:0016841	ammonia-lyase activity	MF	0.000756655	3	5	177	7105	GRMZM2G160541_P02, GRMZM2G074604_P01, GRMZM2G441347_P01
GO:0045548	phenylalanine ammonia-lyase activity	MF	0.000142752	3	2	177	7108	GRMZM2G160541_P02, GRMZM2G074604_P01, GRMZM2G441347_P01
GO:0009699	phenylpropanoid biosynthetic process	BP	0.0103565	4	31	176	7079	GRMZM2G160541_P02, GRMZM2G074604_P01, GRMZM2G127948_P01, GRMZM2G441347_P01
GO:0019904	protein domain specific binding	MF	3.55633e-06	5	6	175	7104	GRMZM2G153823_P01, AC217050.4_FGP006, GRMZM2G078641_P01, GRMZM2G140545_P01, GRMZM2G408768_P01
GO:0072347	response to anesthetic	BP	0.0246914	1	0	179	7110	GRMZM2G152908_P01
GO:0010037	response to carbon dioxide	BP	0.0246914	1	0	179	7110	GRMZM2G152908_P01
GO:0034051	negative regulation of plant-type hypersensitive response	BP	0.0246914	1	0	179	7110	GRMZM2G141707_P01
GO:0016705	oxidoreductase activity, acting on paired donors, with incorporation or reduction of molecular oxygen	MF	0.0109223	6	70	174	7040	GRMZM2G139874_P01, GRMZM2G180399_P01, GRMZM2G013082_P01, GRMZM2G091456_P01, GRMZM2G062396_P01, GRMZM2G085661_P01
GO:0019748	secondary metabolic process	BP	0.00818585	8	109	172	7001	GRMZM2G139874_P01, GRMZM2G160541_P02, GRMZM2G330635_P01, GRMZM2G085661_P01, GRMZM2G447632_P01, GRMZM2G074604_P01, GRMZM2G127948_P01, GRMZM2G441347_P01
GO:0044550	secondary metabolite biosynthetic process	BP	0.0130741	6	73	174	7037	GRMZM2G139874_P01, GRMZM2G160541_P02, GRMZM2G085661_P01, GRMZM2G074604_P01, GRMZM2G127948_P01, GRMZM2G441347_P01
GO:0009698	phenylpropanoid metabolic process	BP	0.00352179	5	37	175	7073	GRMZM2G139874_P01, GRMZM2G160541_P02, GRMZM2G074604_P01, GRMZM2G127948_P01, GRMZM2G441347_P01
GO:0016709	oxidoreductase activity, acting on paired donors, with incorporation or reduction of molecular oxygen, NAD(P)H as one donor, and incorporation of one atom of oxygen	MF	0.0469912	3	30	177	7080	GRMZM2G139874_P01, GRMZM2G091456_P01, GRMZM2G085661_P01
GO:0005506	iron ion binding	MF	0.00886321	7	88	173	7022	GRMZM2G139874_P01, GRMZM2G085661_P01, GRMZM2G114642_P01, GRMZM2G013082_P01, GRMZM2G079759_P01, GRMZM2G062396_P01, GRMZM2G156861_P02
GO:0046906	tetrapyrrole binding	MF	0.0258676	8	136	172	6974	GRMZM2G139874_P01, AC197758.3_FGP004, GRMZM2G085661_P01, GRMZM6G639283_P01, GRMZM2G168898_P01, GRMZM2G126261_P01, GRMZM2G013082_P01, GRMZM2G028986_P01
GO:0020037	heme binding	MF	0.00818585	8	109	172	7001	GRMZM2G139874_P01, AC197758.3_FGP004, GRMZM2G085661_P01, GRMZM6G639283_P01, GRMZM2G168898_P01, GRMZM2G126261_P01, GRMZM2G013082_P01, GRMZM2G028986_P01
GO:0016710	trans-cinnamate 4-monooxygenase activity	MF	0.0246914	1	0	179	7110	GRMZM2G139874_P01
GO:0006729	tetrahydrobiopterin biosynthetic process	BP	0.0246914	1	0	179	7110	GRMZM2G139123_P01
GO:0034312	diol biosynthetic process	BP	0.0246914	1	0	179	7110	GRMZM2G139123_P01
GO:0034311	diol metabolic process	BP	0.0246914	1	0	179	7110	GRMZM2G139123_P01
GO:0046146	tetrahydrobiopterin metabolic process	BP	0.0246914	1	0	179	7110	GRMZM2G139123_P01
GO:0008124	4-alpha-hydroxytetrahydrobiopterin dehydratase activity	MF	0.0246914	1	0	179	7110	GRMZM2G139123_P01
GO:0044706	multi-multicellular organism process	BP	0.0368813	3	27	177	7083	GRMZM2G128171_P03, GRMZM2G465169_P02, GRMZM2G159369_P01
GO:0009856	pollination	BP	0.0368813	3	27	177	7083	GRMZM2G128171_P03, GRMZM2G465169_P02, GRMZM2G159369_P01
GO:0048868	pollen tube development	BP	0.0395536	2	11	178	7099	GRMZM2G128171_P03, GRMZM2G159369_P01
GO:0009567	double fertilization forming a zygote and endosperm	BP	0.00352076	2	2	178	7108	GRMZM2G128171_P03, GRMZM2G159369_P01
GO:0009566	fertilization	BP	0.00352076	2	2	178	7108	GRMZM2G128171_P03, GRMZM2G159369_P01
GO:0009627	systemic acquired resistance	BP	0.00919258	3	15	177	7095	GRMZM2G128171_P03, GRMZM2G101875_P01, GRMZM2G159369_P01
GO:0042409	caffeoyl-CoA O-methyltransferase activity	MF	0.0246914	1	0	179	7110	GRMZM2G127948_P01
GO:0001872	(1->3)-beta-D-glucan binding	MF	0.0246914	1	0	179	7110	GRMZM2G123714_P01
GO:0016884	carbon-nitrogen ligase activity, with glutamine as amido-N-donor	MF	0.0253658	3	23	177	7087	GRMZM2G119219_P03, GRMZM2G443495_P05, GRMZM2G003762_P03
GO:0006528	asparagine metabolic process	BP	0.0117339	2	5	178	7105	GRMZM2G119219_P03, GRMZM2G003762_P03
GO:0006529	asparagine biosynthetic process	BP	0.0117339	2	5	178	7105	GRMZM2G119219_P03, GRMZM2G003762_P03
GO:0004066	asparagine synthase (glutamine-hydrolyzing) activity	MF	0.0117339	2	5	178	7105	GRMZM2G119219_P03, GRMZM2G003762_P03
GO:0007017	microtubule-based process	BP	0.00221464	6	49	174	7061	GRMZM2G115766_P01, GRMZM2G071790_P05, GRMZM2G465169_P02, GRMZM2G152466_P01, GRMZM2G164696_P01, GRMZM2G071518_P01
GO:0000226	microtubule cytoskeleton organization	BP	0.0434837	3	29	177	7081	GRMZM2G115766_P01, GRMZM2G071518_P01, GRMZM2G465169_P02
GO:0042335	cuticle development	BP	0.00851899	2	4	178	7106	GRMZM2G114642_P01, GRMZM2G445602_P01
GO:0019953	sexual reproduction	BP	0.00259435	4	20	176	7090	GRMZM2G114642_P01, GRMZM2G159369_P01, GRMZM2G094990_P01, GRMZM2G128171_P03
GO:0044703	multi-organism reproductive process	BP	0.00259435	4	20	176	7090	GRMZM2G114642_P01, GRMZM2G159369_P01, GRMZM2G094990_P01, GRMZM2G128171_P03
GO:1901568	fatty acid derivative metabolic process	BP	0.00851899	2	4	178	7106	GRMZM2G114642_P01, GRMZM2G101875_P01
GO:1901570	fatty acid derivative biosynthetic process	BP	0.00352076	2	2	178	7108	GRMZM2G114642_P01, GRMZM2G101875_P01
GO:0010025	wax biosynthetic process	BP	0.00178946	2	1	178	7109	GRMZM2G114642_P01, GRMZM2G101875_P01
GO:0010166	wax metabolic process	BP	0.00178946	2	1	178	7109	GRMZM2G114642_P01, GRMZM2G101875_P01
GO:0048235	pollen sperm cell differentiation	BP	0.0487764	1	1	179	7109	GRMZM2G114642_P01
GO:0006723	cuticle hydrocarbon biosynthetic process	BP	0.0246914	1	0	179	7110	GRMZM2G114642_P01
GO:0043446	cellular alkane metabolic process	BP	0.0246914	1	0	179	7110	GRMZM2G114642_P01
GO:0043447	alkane biosynthetic process	BP	0.0246914	1	0	179	7110	GRMZM2G114642_P01
GO:0002215	defense response to nematode	BP	0.00178946	2	1	178	7109	GRMZM2G109130_P01, GRMZM2G156861_P02
GO:0070180	large ribosomal subunit rRNA binding	MF	0.0194726	2	7	178	7103	GRMZM2G105712_P06, GRMZM2G032315_P01
GO:0051704	multi-organism process	BP	0.0478847	9	183	171	6927	GRMZM2G101875_P01, GRMZM6G397851_P01, GRMZM2G109130_P01, GRMZM2G114642_P01, GRMZM2G465169_P02, GRMZM2G159369_P01, GRMZM2G094990_P01, GRMZM2G128171_P03, GRMZM2G156861_P02
GO:0009607	response to biotic stimulus	BP	0.0222892	8	132	172	6978	GRMZM2G101875_P01, GRMZM6G397851_P01, GRMZM2G075283_P01, GRMZM2G102356_P01, GRMZM2G109130_P01, GRMZM2G159369_P01, GRMZM2G128171_P03, GRMZM2G156861_P02
GO:0031957	very long-chain fatty acid-CoA ligase activity	MF	0.0246914	1	0	179	7110	GRMZM2G101875_P01
GO:0019905	syntaxin binding	MF	0.00851899	2	4	178	7106	GRMZM2G098496_P02, GRMZM2G145175_P02
GO:0005483	soluble NSF attachment protein activity	MF	0.000606359	2	0	178	7110	GRMZM2G098496_P02, GRMZM2G145175_P02
GO:0035494	SNARE complex disassembly	BP	0.0246914	1	0	179	7110	GRMZM2G098496_P02
GO:0004506	squalene monooxygenase activity	MF	0.0246914	1	0	179	7110	GRMZM2G091456_P01
GO:0036190	indole-2-monooxygenase activity	MF	0.0246914	1	0	179	7110	GRMZM2G085661_P01
GO:0030797	24-methylenesterol C-methyltransferase activity	MF	0.0487764	1	1	179	7109	GRMZM2G075701_P01
GO:0008610	lipid biosynthetic process	BP	0.0190045	12	235	168	6875	GRMZM2G075140_P01, GRMZM2G180399_P01, GRMZM2G003501_P01, GRMZM2G445602_P01, GRMZM2G062481_P01, GRMZM2G109130_P01, GRMZM2G114642_P01, GRMZM2G168898_P01, GRMZM2G152686_P01, GRMZM2G075701_P01, GRMZM2G156861_P02, GRMZM2G181542_P01
GO:0006633	fatty acid biosynthetic process	BP	1.19916e-05	10	64	170	7046	GRMZM2G075140_P01, GRMZM2G180399_P01, GRMZM2G003501_P01, GRMZM2G445602_P01, GRMZM2G062481_P01, GRMZM2G109130_P01, GRMZM2G114642_P01, GRMZM2G152686_P01, GRMZM2G156861_P02, GRMZM2G181542_P01
GO:0006631	fatty acid metabolic process	BP	3.9949e-05	12	109	168	7001	GRMZM2G075140_P01, GRMZM2G180399_P01, GRMZM2G003501_P01, GRMZM2G101875_P01, GRMZM2G445602_P01, GRMZM2G062481_P01, GRMZM2G109130_P01, GRMZM2G114642_P01, GRMZM2G168898_P01, GRMZM2G152686_P01, GRMZM2G156861_P02, GRMZM2G181542_P01
GO:0016747	transferase activity, transferring acyl groups other than amino-acyl groups	MF	0.0322137	7	116	173	6994	GRMZM2G075140_P01, GRMZM2G003501_P01, GRMZM2G445602_P01, GRMZM2G137961_P01, GRMZM2G128564_P01, AC155610.2_FGP007, GRMZM2G098239_P01
GO:0005200	structural constituent of cytoskeleton	MF	0.000838694	4	14	176	7096	GRMZM2G071790_P05, GRMZM2G152466_P01, GRMZM2G164696_P01, GRMZM2G071518_P01
GO:0008017	microtubule binding	MF	0.0340111	2	10	178	7100	GRMZM2G071518_P01, GRMZM2G465169_P02
GO:0090307	mitotic spindle assembly	BP	0.0487764	1	1	179	7109	GRMZM2G071518_P01
GO:1902850	microtubule cytoskeleton organization involved in mitosis	BP	0.0487764	1	1	179	7109	GRMZM2G071518_P01
GO:0007052	mitotic spindle organization	BP	0.0487764	1	1	179	7109	GRMZM2G071518_P01
GO:0051298	centrosome duplication	BP	0.0487764	1	1	179	7109	GRMZM2G071518_P01
GO:0051418	microtubule nucleation by microtubule organizing center	BP	0.0487764	1	1	179	7109	GRMZM2G071518_P01
GO:0051415	microtubule nucleation by interphase microtubule organizing center	BP	0.0487764	1	1	179	7109	GRMZM2G071518_P01
GO:0051011	microtubule minus-end binding	MF	0.0487764	1	1	179	7109	GRMZM2G071518_P01
GO:0046688	response to copper ion	BP	0.0487764	1	1	179	7109	GRMZM2G071450_P01
GO:0045486	naringenin 3-dioxygenase activity	MF	0.0246914	1	0	179	7110	GRMZM2G062396_P01
GO:0080048	GDP-D-glucose phosphorylase activity	MF	0.0487764	1	1	179	7109	GRMZM2G057186_P01
GO:0006749	glutathione metabolic process	BP	0.0436866	4	50	176	7060	GRMZM2G043291_P02, GRMZM2G330635_P01, GRMZM2G146246_P02, GRMZM2G447632_P01
GO:0004364	glutathione transferase activity	MF	0.0281028	4	43	176	7067	GRMZM2G043291_P02, GRMZM2G330635_P01, GRMZM2G146246_P02, GRMZM2G447632_P01
GO:0043228	non-membrane-bounded organelle	CC	0.0173176	21	500	159	6610
GO:0043232	intracellular non-membrane-bounded organelle	CC	0.0173176	21	500	159	6610
GO:1990904	ribonucleoprotein complex	CC	0.0149422	19	431	161	6679
GO:0005840	ribosome	CC	0.0109236	13	244	167	6866
GO:0044445	cytosolic part	CC	0.00485753	11	169	169	6941
GO:0044391	ribosomal subunit	CC	0.00427993	11	166	169	6944
GO:0022626	cytosolic ribosome	CC	0.00512507	10	146	170	6964
GO:0015934	large ribosomal subunit	CC	0.0012518	9	98	171	7012
GO:0022625	cytosolic large ribosomal subunit	CC	0.00130971	8	79	172	7031
GO:0044437	vacuolar part	CC	0.0347321	7	118	173	6992
GO:0005774	vacuolar membrane	CC	0.0310018	7	115	173	6995
GO:0019012	virion	CC	0.0230653	5	61	175	7049
GO:0044423	virion part	CC	0.0230653	5	61	175	7049
GO:0019028	viral capsid	CC	0.0169325	5	56	175	7054
GO:0019013	viral nucleocapsid	CC	0.0128908	5	52	175	7058
GO:0030684	preribosome	CC	0.00063689	5	24	175	7086
GO:0015630	microtubule cytoskeleton	CC	0.0281028	4	43	176	7067
GO:0099080	supramolecular complex	CC	0.0137901	4	34	176	7076
GO:0099081	supramolecular polymer	CC	0.0137901	4	34	176	7076
GO:0099512	supramolecular fiber	CC	0.0137901	4	34	176	7076
GO:0099513	polymeric cytoskeletal fiber	CC	0.0125753	4	33	176	7077
GO:0005874	microtubule	CC	0.00934947	4	30	176	7080
GO:0030687	preribosome, large subunit precursor	CC	0.00276333	3	9	177	7101
GO:0032040	small-subunit processome	CC	0.045411	2	12	178	7098
GO:0005732	small nucleolar ribonucleoprotein complex	CC	0.0395536	2	11	178	7099
GO:0031428	box C/D snoRNP complex	CC	0.00851899	2	4	178	7106
GO:0000276	mitochondrial proton-transporting ATP synthase complex, coupling factor F(o)	CC	0.0487764	1	1	179	7109
GO:0000923	equatorial microtubule organizing center	CC	0.0487764	1	1	179	7109
GO:0000922	spindle pole	CC	0.0487764	1	1	179	7109
GO:0005853	eukaryotic translation elongation factor 1 complex	CC	0.0487764	1	1	179	7109
GO:0005816	spindle pole body	CC	0.0487764	1	1	179	7109
GO:0032155	cell division site part	CC	0.0487764	1	1	179	7109
GO:0032153	cell division site	CC	0.0487764	1	1	179	7109
GO:0008275	gamma-tubulin small complex	CC	0.0487764	1	1	179	7109
GO:0005971	ribonucleoside-diphosphate reductase complex	CC	0.0246914	1	0	179	7110

## Sheet: first leaf KR701-specific res
GO enrichment analysis of chilling tolerant line KR701-specific responsive proteins at first leaf stage.
GO.ID	GO.Name	GO.Category	P.Value	Nr.Test	Nr.Reference	Non.Annot.Test	Non.Annot.Reference	SeqTest
GO:0016706	oxidoreductase activity, acting on paired donors, with incorporation or reduction of molecular oxygen, 2-oxoglutarate as one donor, and incorporation of one atom each of oxygen into both donors	MF	0.0163417	2	5	212	7071	GRMZM6G617209_P01, AC148152.3_FGP005
GO:0043572	plastid fission	BP	0.0213715	2	6	212	7070	GRMZM6G007923_P01, GRMZM2G119773_P01
GO:0010020	chloroplast fission	BP	0.0213715	2	6	212	7070	GRMZM6G007923_P01, GRMZM2G119773_P01
GO:0032955	regulation of division septum assembly	BP	0.0293553	1	0	213	7076	GRMZM6G007923_P01
GO:0032954	regulation of cytokinetic process	BP	0.0293553	1	0	213	7076	GRMZM6G007923_P01
GO:1902412	regulation of mitotic cytokinesis	BP	0.0293553	1	0	213	7076	GRMZM6G007923_P01
GO:1901891	regulation of cell septum assembly	BP	0.0293553	1	0	213	7076	GRMZM6G007923_P01
GO:1903436	regulation of mitotic cytokinetic process	BP	0.0293553	1	0	213	7076	GRMZM6G007923_P01
GO:0032465	regulation of cytokinesis	BP	0.0293553	1	0	213	7076	GRMZM6G007923_P01
GO:0019904	protein domain specific binding	MF	0.0396239	2	9	212	7067	GRMZM5G866082_P02, GRMZM2G106424_P01
GO:0001664	G-protein coupled receptor binding	MF	0.0293553	1	0	213	7076	GRMZM5G803318_P03
GO:0018826	methionine gamma-lyase activity	MF	0.0293553	1	0	213	7076	GRMZM2G450498_P01
GO:0016168	chlorophyll binding	MF	0.00562526	4	21	210	7055	GRMZM2G377855_P01, GRMZM5G856777_P01, GRMZM2G329047_P01, GRMZM2G429955_P01
GO:0046906	tetrapyrrole binding	MF	0.0255576	9	135	205	6941	GRMZM2G377855_P01, GRMZM2G063756_P01, GRMZM2G329047_P01, GRMZM2G394500_P01, GRMZM2G429955_P01, GRMZM2G122853_P01, GRMZM2G133434_P01, GRMZM5G856777_P01, GRMZM2G167549_P03
GO:0005198	structural molecule activity	MF	0.0388385	15	295	199	6781	GRMZM2G360021_P01, GRMZM2G361569_P01, GRMZM2G334899_P01, GRMZM2G054136_P09, GRMZM2G096962_P02, GRMZM2G043903_P02, GRMZM2G171484_P01, GRMZM2G063340_P04, GRMZM2G083253_P02, GRMZM2G112805_P01, GRMZM5G868757_P04, GRMZM2G145280_P01, GRMZM2G033653_P01, GRMZM2G119773_P01, GRMZM2G017957_P02
GO:0009664	plant-type cell wall organization	BP	0.0223558	4	33	210	7043	GRMZM2G353276_P01, GRMZM2G361064_P01, GRMZM2G394500_P01, GRMZM2G122853_P01
GO:0043891	glyceraldehyde-3-phosphate dehydrogenase (NAD(P)+) (phosphorylating) activity	MF	0.00808993	2	3	212	7073	GRMZM2G337113_P02, GRMZM5G845611_P01
GO:0047100	glyceraldehyde-3-phosphate dehydrogenase (NADP+) (phosphorylating) activity	MF	0.0293553	1	0	213	7076	GRMZM2G337113_P02
GO:0004322	ferroxidase activity	MF	0.0293553	1	0	213	7076	GRMZM2G325575_P01
GO:0008199	ferric iron binding	MF	0.0293553	1	0	213	7076	GRMZM2G325575_P01
GO:0016724	oxidoreductase activity, oxidizing metal ions, oxygen as acceptor	MF	0.0293553	1	0	213	7076	GRMZM2G325575_P01
GO:0004331	fructose-2,6-bisphosphate 2-phosphatase activity	MF	0.0293553	1	0	213	7076	GRMZM2G306732_P01
GO:0015908	fatty acid transport	BP	0.0293553	1	0	213	7076	GRMZM2G177812_P01
GO:0015245	fatty acid transmembrane transporter activity	MF	0.0293553	1	0	213	7076	GRMZM2G177812_P01
GO:0009686	gibberellin biosynthetic process	BP	0.0293553	1	0	213	7076	GRMZM2G173128_P01
GO:0009685	gibberellin metabolic process	BP	0.0293553	1	0	213	7076	GRMZM2G173128_P01
GO:0016102	diterpenoid biosynthetic process	BP	0.0293553	1	0	213	7076	GRMZM2G173128_P01
GO:0036191	indolin-2-one monooxygenase activity	MF	0.0293553	1	0	213	7076	GRMZM2G167549_P03
GO:0030366	molybdopterin synthase activity	MF	0.0293553	1	0	213	7076	GRMZM2G165966_P01
GO:0043530	adenosine 5'-monophosphoramidase activity	MF	0.0293553	1	0	213	7076	GRMZM2G165815_P02
GO:2000071	regulation of defense response by callose deposition	BP	0.0293553	1	0	213	7076	GRMZM2G163641_P01
GO:0002239	response to oomycetes	BP	0.0293553	1	0	213	7076	GRMZM2G163641_P01
GO:0002229	defense response to oomycetes	BP	0.0293553	1	0	213	7076	GRMZM2G163641_P01
GO:0009960	endosperm development	BP	0.0119012	2	4	212	7072	GRMZM2G163421_P01, GRMZM2G091481_P01
GO:0034975	protein folding in endoplasmic reticulum	BP	0.0119012	2	4	212	7072	GRMZM2G163421_P01, GRMZM2G091481_P01
GO:0051131	chaperone-mediated protein complex assembly	BP	0.00494948	2	2	212	7074	GRMZM2G162688_P01, GRMZM2G063850_P01
GO:0051879	Hsp90 protein binding	MF	0.00252356	2	1	212	7075	GRMZM2G162688_P01, GRMZM2G063850_P01
GO:0070678	preprotein binding	MF	0.000858	2	0	212	7076	GRMZM2G162688_P01, GRMZM2G063850_P01
GO:0031072	heat shock protein binding	MF	0.0434716	3	24	211	7052	GRMZM2G162688_P01, GRMZM2G039089_P03, GRMZM2G063850_P01
GO:0015716	organic phosphonate transport	BP	0.000858	2	0	212	7076	GRMZM2G157564_P02, GRMZM2G177812_P01
GO:0015605	organophosphate ester transmembrane transporter activity	MF	0.0269524	2	7	212	7069	GRMZM2G157564_P02, GRMZM2G177812_P01
GO:0043225	ATPase-coupled anion transmembrane transporter activity	MF	0.00252356	2	1	212	7075	GRMZM2G157564_P02, GRMZM2G177812_P01
GO:0015604	organic phosphonate transmembrane transporter activity	MF	0.000858	2	0	212	7076	GRMZM2G157564_P02, GRMZM2G177812_P01
GO:0015416	ATPase-coupled organic phosphonate transmembrane transporter activity	MF	0.000858	2	0	212	7076	GRMZM2G157564_P02, GRMZM2G177812_P01
GO:0047372	acylglycerol lipase activity	MF	0.0293553	1	0	213	7076	GRMZM2G154523_P01
GO:0004575	sucrose alpha-glucosidase activity	MF	0.0269524	2	7	212	7069	GRMZM2G139300_P01, GRMZM2G089836_P01
GO:0031324	negative regulation of cellular metabolic process	BP	0.0484096	6	84	208	6992	GRMZM2G119705_P01, GRMZM2G000326_P02, GRMZM2G438551_P02, GRMZM2G156632_P01, GRMZM2G114552_P04, GRMZM2G011523_P01
GO:0051172	negative regulation of nitrogen compound metabolic process	BP	0.0346497	6	77	208	6999	GRMZM2G119705_P01, GRMZM2G000326_P02, GRMZM2G438551_P02, GRMZM2G156632_P01, GRMZM2G114552_P04, GRMZM2G011523_P01
GO:0051248	negative regulation of protein metabolic process	BP	0.000238	6	25	208	7051	GRMZM2G119705_P01, GRMZM2G000326_P02, GRMZM2G438551_P02, GRMZM2G156632_P01, GRMZM2G114552_P04, GRMZM2G011523_P01
GO:0032269	negative regulation of cellular protein metabolic process	BP	0.000238	6	25	208	7051	GRMZM2G119705_P01, GRMZM2G000326_P02, GRMZM2G438551_P02, GRMZM2G156632_P01, GRMZM2G114552_P04, GRMZM2G011523_P01
GO:0045004	DNA replication proofreading	BP	0.0293553	1	0	213	7076	GRMZM2G115245_P01
GO:0006287	base-excision repair, gap-filling	BP	0.0293553	1	0	213	7076	GRMZM2G115245_P01
GO:0006297	nucleotide-excision repair, DNA gap filling	BP	0.0293553	1	0	213	7076	GRMZM2G115245_P01
GO:0010921	regulation of phosphatase activity	BP	0.0269524	2	7	212	7069	GRMZM2G112524_P02, GRMZM2G112488_P01
GO:0043666	regulation of phosphoprotein phosphatase activity	BP	0.0213715	2	6	212	7070	GRMZM2G112524_P02, GRMZM2G112488_P01
GO:0080163	regulation of protein serine/threonine phosphatase activity	BP	0.0213715	2	6	212	7070	GRMZM2G112524_P02, GRMZM2G112488_P01
GO:0042562	hormone binding	MF	0.0466466	2	10	212	7066	GRMZM2G112524_P02, GRMZM2G112488_P01
GO:0043178	alcohol binding	MF	0.0330481	2	8	212	7068	GRMZM2G112524_P02, GRMZM2G112488_P01
GO:0019840	isoprenoid binding	MF	0.0269524	2	7	212	7069	GRMZM2G112524_P02, GRMZM2G112488_P01
GO:0010427	abscisic acid binding	MF	0.0269524	2	7	212	7069	GRMZM2G112524_P02, GRMZM2G112488_P01
GO:0019208	phosphatase regulator activity	MF	0.0269524	2	7	212	7069	GRMZM2G112524_P02, GRMZM2G112488_P01
GO:0019212	phosphatase inhibitor activity	MF	0.0269524	2	7	212	7069	GRMZM2G112524_P02, GRMZM2G112488_P01
GO:0019888	protein phosphatase regulator activity	MF	0.0213715	2	6	212	7070	GRMZM2G112524_P02, GRMZM2G112488_P01
GO:0004864	protein phosphatase inhibitor activity	MF	0.0213715	2	6	212	7070	GRMZM2G112524_P02, GRMZM2G112488_P01
GO:0051246	regulation of protein metabolic process	BP	0.0384433	9	146	205	6930	GRMZM2G112488_P01, GRMZM2G011523_P01, GRMZM2G119705_P01, GRMZM2G000326_P02, GRMZM2G438551_P02, GRMZM2G025882_P01, GRMZM2G156632_P01, GRMZM2G112524_P02, GRMZM2G114552_P04
GO:0032268	regulation of cellular protein metabolic process	BP	0.0287124	9	138	205	6938	GRMZM2G112488_P01, GRMZM2G011523_P01, GRMZM2G119705_P01, GRMZM2G000326_P02, GRMZM2G438551_P02, GRMZM2G025882_P01, GRMZM2G156632_P01, GRMZM2G112524_P02, GRMZM2G114552_P04
GO:0043086	negative regulation of catalytic activity	BP	9.9e-05	7	31	207	7045	GRMZM2G112488_P01, GRMZM2G011523_P01, GRMZM2G000326_P02, GRMZM2G438551_P02, GRMZM2G156632_P01, GRMZM2G112524_P02, GRMZM2G114552_P04
GO:0044092	negative regulation of molecular function	BP	0.000192	7	35	207	7041	GRMZM2G112488_P01, GRMZM2G011523_P01, GRMZM2G000326_P02, GRMZM2G438551_P02, GRMZM2G156632_P01, GRMZM2G112524_P02, GRMZM2G114552_P04
GO:0004857	enzyme inhibitor activity	MF	4.66e-05	7	27	207	7049	GRMZM2G112488_P01, GRMZM2G011523_P01, GRMZM2G000326_P02, GRMZM2G438551_P02, GRMZM2G156632_P01, GRMZM2G112524_P02, GRMZM2G114552_P04
GO:0004190	aspartic-type endopeptidase activity	MF	0.00562526	4	21	210	7055	GRMZM2G112337_P02, GRMZM2G042008_P01, GRMZM2G320521_P01, GRMZM2G024099_P01
GO:0070001	aspartic-type peptidase activity	MF	0.00562526	4	21	210	7055	GRMZM2G112337_P02, GRMZM2G042008_P01, GRMZM2G320521_P01, GRMZM2G024099_P01
GO:0008444	CDP-diacylglycerol-glycerol-3-phosphate 3-phosphatidyltransferase activity	MF	0.0293553	1	0	213	7076	GRMZM2G109967_P02
GO:0016998	cell wall macromolecule catabolic process	BP	0.0269524	2	7	212	7069	GRMZM2G103668_P01, GRMZM2G051943_P01
GO:0047746	chlorophyllase activity	MF	0.0293553	1	0	213	7076	GRMZM2G103197_P01
GO:0046487	glyoxylate metabolic process	BP	0.0330481	2	8	212	7068	GRMZM2G102183_P02, GRMZM2G173128_P01
GO:0004474	malate synthase activity	MF	0.0293553	1	0	213	7076	GRMZM2G102183_P02
GO:0004565	beta-galactosidase activity	MF	0.0269524	2	7	212	7069	GRMZM2G081583_P02, GRMZM2G038281_P02
GO:0050790	regulation of catalytic activity	BP	0.0426114	9	149	205	6927	GRMZM2G078933_P01, GRMZM5G803318_P03, GRMZM2G112488_P01, GRMZM2G011523_P01, GRMZM2G000326_P02, GRMZM2G438551_P02, GRMZM2G156632_P01, GRMZM2G112524_P02, GRMZM2G114552_P04
GO:0098772	molecular function regulator	MF	0.0110383	9	116	205	6960	GRMZM2G078933_P01, GRMZM5G803318_P03, GRMZM2G112488_P01, GRMZM2G011523_P01, GRMZM2G000326_P02, GRMZM2G438551_P02, GRMZM2G156632_P01, GRMZM2G112524_P02, GRMZM2G114552_P04
GO:0030234	enzyme regulator activity	MF	0.00518132	9	102	205	6974	GRMZM2G078933_P01, GRMZM5G803318_P03, GRMZM2G112488_P01, GRMZM2G011523_P01, GRMZM2G000326_P02, GRMZM2G438551_P02, GRMZM2G156632_P01, GRMZM2G112524_P02, GRMZM2G114552_P04
GO:0051336	regulation of hydrolase activity	BP	0.000955	8	62	206	7014	GRMZM2G078933_P01, GRMZM2G112488_P01, GRMZM2G011523_P01, GRMZM2G000326_P02, GRMZM2G438551_P02, GRMZM2G156632_P01, GRMZM2G112524_P02, GRMZM2G114552_P04
GO:0010253	UDP-rhamnose biosynthetic process	BP	0.0293553	1	0	213	7076	GRMZM2G072911_P01
GO:0046383	dTDP-rhamnose metabolic process	BP	0.0293553	1	0	213	7076	GRMZM2G072911_P01
GO:0033478	UDP-rhamnose metabolic process	BP	0.0293553	1	0	213	7076	GRMZM2G072911_P01
GO:0019305	dTDP-rhamnose biosynthetic process	BP	0.0293553	1	0	213	7076	GRMZM2G072911_P01
GO:0010490	UDP-4-keto-rhamnose-4-keto-reductase activity	MF	0.0293553	1	0	213	7076	GRMZM2G072911_P01
GO:0010489	UDP-4-keto-6-deoxy-glucose-3,5-epimerase activity	MF	0.0293553	1	0	213	7076	GRMZM2G072911_P01
GO:0008830	dTDP-4-dehydrorhamnose 3,5-epimerase activity	MF	0.0293553	1	0	213	7076	GRMZM2G072911_P01
GO:0050896	response to stimulus	BP	0.0399831	42	1057	172	6019	GRMZM2G054123_P04, GRMZM2G163421_P01, GRMZM2G009030_P01, GRMZM2G155111_P01, GRMZM2G119705_P01, GRMZM2G025882_P01, GRMZM2G107839_P01, GRMZM2G106690_P01, GRMZM5G856966_P01, GRMZM2G034302_P01, GRMZM2G016890_P01, GRMZM2G051943_P01, AC199526.5_FGP002, GRMZM2G320521_P01, GRMZM2G394500_P01, GRMZM2G429955_P01, GRMZM2G308687_P01, GRMZM2G445958_P01, GRMZM2G159250_P01, GRMZM2G000326_P02, GRMZM2G119773_P01, …
GO:0016765	transferase activity, transferring alkyl or aryl (other than methyl) groups	MF	0.019138	7	86	207	6990	GRMZM2G054123_P04, GRMZM2G149317_P01, GRMZM2G117707_P02, AC199526.5_FGP002, GRMZM2G308687_P01, GRMZM2G042639_P04, GRMZM2G096247_P01
GO:0046500	S-adenosylmethionine metabolic process	BP	0.0396239	2	9	212	7067	GRMZM2G054123_P04, AC199526.5_FGP002
GO:0006556	S-adenosylmethionine biosynthetic process	BP	0.00494948	2	2	212	7074	GRMZM2G054123_P04, AC199526.5_FGP002
GO:0004478	methionine adenosyltransferase activity	MF	0.00494948	2	2	212	7074	GRMZM2G054123_P04, AC199526.5_FGP002
GO:0071396	cellular response to lipid	BP	0.00807984	5	38	209	7038	GRMZM2G047486_P01, GRMZM2G163641_P01, GRMZM2G112488_P01, GRMZM2G112524_P02, GRMZM2G173128_P01
GO:0071229	cellular response to acid chemical	BP	0.0270532	5	53	209	7023	GRMZM2G047486_P01, GRMZM2G163641_P01, GRMZM2G112488_P01, GRMZM2G112524_P02, GRMZM2G173128_P01
GO:0071215	cellular response to abscisic acid stimulus	BP	0.0185437	4	31	210	7045	GRMZM2G047486_P01, GRMZM2G163641_P01, GRMZM2G112488_P01, GRMZM2G112524_P02
GO:0009738	abscisic acid-activated signaling pathway	BP	0.0185437	4	31	210	7045	GRMZM2G047486_P01, GRMZM2G163641_P01, GRMZM2G112488_P01, GRMZM2G112524_P02
GO:0097306	cellular response to alcohol	BP	0.0185437	4	31	210	7045	GRMZM2G047486_P01, GRMZM2G163641_P01, GRMZM2G112488_P01, GRMZM2G112524_P02
GO:0001101	response to acid chemical	BP	0.000811	11	110	203	6966	GRMZM2G047486_P01, GRMZM2G112488_P01, GRMZM2G132461_P02, GRMZM2G320521_P01, GRMZM2G129761_P01, GRMZM2G155111_P01, GRMZM2G163641_P01, GRMZM2G107839_P01, GRMZM2G348909_P01, GRMZM2G112524_P02, GRMZM2G173128_P01
GO:0033993	response to lipid	BP	0.00246971	8	73	206	7003	GRMZM2G047486_P01, GRMZM2G112488_P01, GRMZM2G132461_P02, GRMZM2G155111_P01, GRMZM2G163641_P01, GRMZM2G348909_P01, GRMZM2G112524_P02, GRMZM2G173128_P01
GO:0009737	response to abscisic acid	BP	0.00425368	7	63	207	7013	GRMZM2G047486_P01, GRMZM2G112488_P01, GRMZM2G132461_P02, GRMZM2G155111_P01, GRMZM2G163641_P01, GRMZM2G348909_P01, GRMZM2G112524_P02
GO:0097305	response to alcohol	BP	0.00425368	7	63	207	7013	GRMZM2G047486_P01, GRMZM2G112488_P01, GRMZM2G132461_P02, GRMZM2G155111_P01, GRMZM2G163641_P01, GRMZM2G348909_P01, GRMZM2G112524_P02
GO:0006517	protein deglycosylation	BP	0.0119012	2	4	212	7072	GRMZM2G038973_P01, GRMZM2G337242_P01
GO:0006013	mannose metabolic process	BP	0.00808993	2	3	212	7073	GRMZM2G038973_P01, GRMZM2G337242_P01
GO:0015923	mannosidase activity	MF	0.0396239	2	9	212	7067	GRMZM2G038973_P01, GRMZM2G337242_P01
GO:0004559	alpha-mannosidase activity	MF	0.0163417	2	5	212	7071	GRMZM2G038973_P01, GRMZM2G337242_P01
GO:0016798	hydrolase activity, acting on glycosyl bonds	MF	0.00347469	13	175	201	6901	GRMZM2G038973_P01, GRMZM2G026980_P01, GRMZM2G081583_P02, GRMZM2G089836_P01, GRMZM2G119705_P01, GRMZM2G103668_P01, GRMZM2G337242_P01, GRMZM2G016890_P01, GRMZM2G009025_P01, GRMZM2G018716_P01, GRMZM2G051943_P01, GRMZM2G038281_P02, GRMZM2G139300_P01
GO:0004634	phosphopyruvate hydratase activity	MF	0.0119012	2	4	212	7072	GRMZM2G034848_P01, GRMZM2G009030_P01
GO:0004564	beta-fructofuranosidase activity	MF	0.00256944	3	7	211	7069	GRMZM2G018716_P01, GRMZM2G139300_P01, GRMZM2G089836_P01
GO:0032870	cellular response to hormone stimulus	BP	0.0364383	6	78	208	6998	GRMZM2G016890_P01, GRMZM2G047486_P01, GRMZM2G163641_P01, GRMZM2G112488_P01, GRMZM2G112524_P02, GRMZM2G173128_P01
GO:0009755	hormone-mediated signaling pathway	BP	0.0329189	6	76	208	7000	GRMZM2G016890_P01, GRMZM2G047486_P01, GRMZM2G163641_P01, GRMZM2G112488_P01, GRMZM2G112524_P02, GRMZM2G173128_P01
GO:0071495	cellular response to endogenous stimulus	BP	0.0364383	6	78	208	6998	GRMZM2G016890_P01, GRMZM2G047486_P01, GRMZM2G163641_P01, GRMZM2G112488_P01, GRMZM2G112524_P02, GRMZM2G173128_P01
GO:0009725	response to hormone	BP	0.00398127	12	157	202	6919	GRMZM2G016890_P01, GRMZM2G047486_P01, GRMZM2G034848_P01, GRMZM2G112488_P01, GRMZM2G009030_P01, GRMZM2G132461_P02, GRMZM2G155111_P01, GRMZM2G163641_P01, GRMZM2G107839_P01, GRMZM2G348909_P01, GRMZM2G112524_P02, GRMZM2G173128_P01
GO:0009719	response to endogenous stimulus	BP	0.00398127	12	157	202	6919	GRMZM2G016890_P01, GRMZM2G047486_P01, GRMZM2G034848_P01, GRMZM2G112488_P01, GRMZM2G009030_P01, GRMZM2G132461_P02, GRMZM2G155111_P01, GRMZM2G163641_P01, GRMZM2G107839_P01, GRMZM2G348909_P01, GRMZM2G112524_P02, GRMZM2G173128_P01
GO:0009735	response to cytokinin	BP	0.024428	4	34	210	7042	GRMZM2G016890_P01, GRMZM2G034848_P01, GRMZM2G009030_P01, GRMZM2G173128_P01
GO:0004553	hydrolase activity, hydrolyzing O-glycosyl compounds	MF	0.00361479	12	155	202	6921	GRMZM2G016890_P01, GRMZM2G009025_P01, GRMZM2G018716_P01, GRMZM2G051943_P01, GRMZM2G038973_P01, GRMZM2G026980_P01, GRMZM2G081583_P02, GRMZM2G089836_P01, GRMZM2G038281_P02, GRMZM2G139300_P01, GRMZM2G103668_P01, GRMZM2G337242_P01
GO:0016864	intramolecular oxidoreductase activity, transposing S-S bonds	MF	0.017081	3	16	211	7060	GRMZM2G014076_P01, GRMZM2G163421_P01, GRMZM2G091481_P01
GO:0003756	protein disulfide isomerase activity	MF	0.017081	3	16	211	7060	GRMZM2G014076_P01, GRMZM2G163421_P01, GRMZM2G091481_P01
GO:0048523	negative regulation of cellular process	BP	0.0461835	7	105	207	6971	GRMZM2G011523_P01, GRMZM2G119705_P01, GRMZM2G000326_P02, GRMZM2G438551_P02, GRMZM2G156632_P01, GRMZM2G114552_P04, GRMZM5G876285_P02
GO:0015979	photosynthesis	BP	0.0198633	12	197	202	6879	GRMZM2G010349_P02, GRMZM2G377855_P01, GRMZM5G874448_P01, GRMZM2G174984_P01, GRMZM2G329047_P01, GRMZM2G429955_P01, GRMZM2G016622_P02, GRMZM2G025882_P01, GRMZM5G856777_P01, GRMZM2G059191_P01, GRMZM2G337113_P02, GRMZM2G306732_P01
GO:0016860	intramolecular oxidoreductase activity	MF	0.0204999	5	49	209	7027	GRMZM2G003853_P01, GRMZM2G014076_P01, GRMZM2G005493_P01, GRMZM2G163421_P01, GRMZM2G091481_P01
GO:0000247	C-8 sterol isomerase activity	MF	0.0293553	1	0	213	7076	GRMZM2G003853_P01
GO:0047750	cholestenol delta-isomerase activity	MF	0.0293553	1	0	213	7076	GRMZM2G003853_P01
GO:0051346	negative regulation of hydrolase activity	BP	6.98e-05	5	11	209	7065	GRMZM2G000326_P02, GRMZM2G438551_P02, GRMZM2G156632_P01, GRMZM2G114552_P04, GRMZM2G011523_P01
GO:0052548	regulation of endopeptidase activity	BP	3.36e-05	5	9	209	7067	GRMZM2G000326_P02, GRMZM2G438551_P02, GRMZM2G156632_P01, GRMZM2G114552_P04, GRMZM2G011523_P01
GO:0052547	regulation of peptidase activity	BP	3.36e-05	5	9	209	7067	GRMZM2G000326_P02, GRMZM2G438551_P02, GRMZM2G156632_P01, GRMZM2G114552_P04, GRMZM2G011523_P01
GO:0010466	negative regulation of peptidase activity	BP	3.36e-05	5	9	209	7067	GRMZM2G000326_P02, GRMZM2G438551_P02, GRMZM2G156632_P01, GRMZM2G114552_P04, GRMZM2G011523_P01
GO:0010951	negative regulation of endopeptidase activity	BP	3.36e-05	5	9	209	7067	GRMZM2G000326_P02, GRMZM2G438551_P02, GRMZM2G156632_P01, GRMZM2G114552_P04, GRMZM2G011523_P01
GO:0030162	regulation of proteolysis	BP	0.00162799	5	25	209	7051	GRMZM2G000326_P02, GRMZM2G438551_P02, GRMZM2G156632_P01, GRMZM2G114552_P04, GRMZM2G011523_P01
GO:0045861	negative regulation of proteolysis	BP	3.36e-05	5	9	209	7067	GRMZM2G000326_P02, GRMZM2G438551_P02, GRMZM2G156632_P01, GRMZM2G114552_P04, GRMZM2G011523_P01
GO:0030414	peptidase inhibitor activity	MF	3.36e-05	5	9	209	7067	GRMZM2G000326_P02, GRMZM2G438551_P02, GRMZM2G156632_P01, GRMZM2G114552_P04, GRMZM2G011523_P01
GO:0004866	endopeptidase inhibitor activity	MF	3.36e-05	5	9	209	7067	GRMZM2G000326_P02, GRMZM2G438551_P02, GRMZM2G156632_P01, GRMZM2G114552_P04, GRMZM2G011523_P01
GO:0061134	peptidase regulator activity	MF	3.36e-05	5	9	209	7067	GRMZM2G000326_P02, GRMZM2G438551_P02, GRMZM2G156632_P01, GRMZM2G114552_P04, GRMZM2G011523_P01
GO:0061135	endopeptidase regulator activity	MF	3.36e-05	5	9	209	7067	GRMZM2G000326_P02, GRMZM2G438551_P02, GRMZM2G156632_P01, GRMZM2G114552_P04, GRMZM2G011523_P01
GO:0004867	serine-type endopeptidase inhibitor activity	MF	8.1e-05	4	5	210	7071	GRMZM2G000326_P02, GRMZM2G156632_P01, GRMZM2G114552_P04, GRMZM2G011523_P01
GO:0051302	regulation of cell division	BP	0.0213715	2	6	212	7070	AC177850.2_FGP005, GRMZM6G007923_P01
GO:0071944	cell periphery	CC	0.0195567	26	555	188	6521
GO:0005576	extracellular region	CC	4.75e-05	17	176	197	6900
GO:0009579	thylakoid	CC	0.0197939	16	294	198	6782
GO:0031976	plastid thylakoid	CC	0.0137302	14	233	200	6843
GO:0009534	chloroplast thylakoid	CC	0.0132886	14	232	200	6844
GO:0044436	thylakoid part	CC	0.0368707	12	217	202	6859
GO:0034357	photosynthetic membrane	CC	0.020539	12	198	202	6878
GO:0042651	thylakoid membrane	CC	0.0192044	12	196	202	6880
GO:0055035	plastid thylakoid membrane	CC	0.0116034	12	182	202	6894
GO:0009535	chloroplast thylakoid membrane	CC	0.0111666	12	181	202	6895
GO:0030312	external encapsulating structure	CC	0.0153773	9	123	205	6953
GO:0005618	cell wall	CC	0.0153773	9	123	205	6953
GO:0048046	apoplast	CC	0.00881673	7	73	207	7003
GO:0005856	cytoskeleton	CC	0.0198392	6	67	208	7009
GO:0009521	photosystem	CC	0.00863433	6	55	208	7021
GO:0044430	cytoskeletal part	CC	0.0288773	5	54	209	7022
GO:0015630	microtubule cytoskeleton	CC	0.0117176	5	42	209	7034
GO:0009522	photosystem I	CC	0.0122023	4	27	210	7049
GO:0005788	endoplasmic reticulum lumen	CC	0.0224608	3	18	211	7058
GO:0005875	microtubule associated complex	CC	0.0163417	2	5	212	7071
GO:0000015	phosphopyruvate hydratase complex	CC	0.0119012	2	4	212	7072
GO:0043625	delta DNA polymerase complex	CC	0.0293553	1	0	213	7076
GO:0000427	plastid-encoded plastid RNA polymerase complex	CC	0.0293553	1	0	213	7076
GO:0042575	DNA polymerase complex	CC	0.0293553	1	0	213	7076

## Sheet: first leaf hei8834-specific res
GO enrichment analysis of chilling sensitive line hei8834-specific responsive proteins at first leaf stage.
GO.ID	GO.Name	GO.Category	P.Value	Nr.Test	Nr.Reference	Non.Annot.Test	Non.Annot.Reference	SeqTest
GO:0022607	cellular component assembly	BP	0.0212734	18	331	206	6735	GRMZM6G101378_P01, GRMZM2G156673_P01, GRMZM2G336815_P01, GRMZM2G063896_P01, GRMZM2G062210_P01, GRMZM2G107588_P01, GRMZM2G325019_P01, GRMZM2G024647_P01, GRMZM2G150030_P01, GRMZM2G025171_P01, GRMZM2G060160_P01, GRMZM2G027451_P04, GRMZM5G809292_P02, GRMZM2G446960_P01, GRMZM2G078985_P01, GRMZM2G003384_P01, GRMZM2G150791_P01, GRMZM5G844628_P01
GO:0043933	protein-containing complex subunit organization	BP	0.0208825	16	282	208	6784	GRMZM6G101378_P01, GRMZM2G156673_P01, GRMZM2G336815_P01, GRMZM2G063896_P01, GRMZM2G062210_P01, GRMZM2G107588_P01, GRMZM2G325019_P01, GRMZM2G024647_P01, GRMZM2G025171_P01, GRMZM2G060160_P01, GRMZM2G027451_P04, GRMZM5G809292_P02, GRMZM2G446960_P01, GRMZM2G078985_P01, GRMZM2G003384_P01, GRMZM5G844628_P01
GO:0065003	protein-containing complex assembly	BP	0.0110919	16	261	208	6805	GRMZM6G101378_P01, GRMZM2G156673_P01, GRMZM2G336815_P01, GRMZM2G063896_P01, GRMZM2G062210_P01, GRMZM2G107588_P01, GRMZM2G325019_P01, GRMZM2G024647_P01, GRMZM2G025171_P01, GRMZM2G060160_P01, GRMZM2G027451_P04, GRMZM5G809292_P02, GRMZM2G446960_P01, GRMZM2G078985_P01, GRMZM2G003384_P01, GRMZM5G844628_P01
GO:0034622	cellular protein-containing complex assembly	BP	0.00642695	16	245	208	6821	GRMZM6G101378_P01, GRMZM2G156673_P01, GRMZM2G336815_P01, GRMZM2G063896_P01, GRMZM2G062210_P01, GRMZM2G107588_P01, GRMZM2G325019_P01, GRMZM2G024647_P01, GRMZM2G025171_P01, GRMZM2G060160_P01, GRMZM2G027451_P04, GRMZM5G809292_P02, GRMZM2G446960_P01, GRMZM2G078985_P01, GRMZM2G003384_P01, GRMZM5G844628_P01
GO:0022613	ribonucleoprotein complex biogenesis	BP	4.17623e-05	18	183	206	6883	GRMZM5G870752_P01, GRMZM2G377797_P01, GRMZM2G156673_P01, GRMZM2G336815_P01, GRMZM2G023748_P01, GRMZM2G168330_P02, GRMZM2G135654_P01, GRMZM2G068471_P01, GRMZM2G053652_P02, GRMZM2G024647_P01, GRMZM2G060160_P01, GRMZM2G027451_P04, GRMZM2G446960_P01, GRMZM2G078985_P01, GRMZM2G003384_P01, GRMZM2G028883_P01, GRMZM5G844628_P01, GRMZM2G043279_P01
GO:0042254	ribosome biogenesis	BP	6.44774e-06	16	126	208	6940	GRMZM5G870752_P01, GRMZM2G377797_P01, GRMZM2G156673_P01, GRMZM2G023748_P01, GRMZM2G168330_P02, GRMZM2G135654_P01, GRMZM2G068471_P01, GRMZM2G053652_P02, GRMZM2G024647_P01, GRMZM2G027451_P04, GRMZM2G446960_P01, GRMZM2G078985_P01, GRMZM2G003384_P01, GRMZM2G028883_P01, GRMZM5G844628_P01, GRMZM2G043279_P01
GO:0042273	ribosomal large subunit biogenesis	BP	2.31888e-07	10	30	214	7036	GRMZM5G870752_P01, GRMZM2G168330_P02, GRMZM2G135654_P01, GRMZM2G068471_P01, GRMZM2G024647_P01, GRMZM2G027451_P04, GRMZM2G003384_P01, GRMZM2G028883_P01, GRMZM2G043279_P01, GRMZM2G023748_P01
GO:0034470	ncRNA processing	BP	0.0239028	9	127	215	6939	GRMZM5G870752_P01, GRMZM2G135654_P01, GRMZM2G068471_P01, GRMZM2G053652_P02, GRMZM2G377797_P01, GRMZM5G802566_P06, GRMZM2G035820_P01, GRMZM2G043279_P01, GRMZM2G023748_P01
GO:0016072	rRNA metabolic process	BP	0.00545009	8	80	216	6986	GRMZM5G870752_P01, GRMZM2G135654_P01, GRMZM2G068471_P01, GRMZM2G053652_P02, GRMZM2G377797_P01, GRMZM2G043279_P01, GRMZM2G029933_P01, GRMZM2G023748_P01
GO:0006364	rRNA processing	BP	0.0171827	7	80	217	6986	GRMZM5G870752_P01, GRMZM2G135654_P01, GRMZM2G068471_P01, GRMZM2G053652_P02, GRMZM2G377797_P01, GRMZM2G043279_P01, GRMZM2G023748_P01
GO:0000470	maturation of LSU-rRNA	BP	0.00016176	5	13	219	7053	GRMZM5G870752_P01, GRMZM2G135654_P01, GRMZM2G068471_P01, GRMZM2G043279_P01, GRMZM2G023748_P01
GO:0048209	regulation of vesicle targeting, to, from or within Golgi	BP	0.030727	1	0	223	7066	GRMZM5G837058_P01
GO:0048564	photosystem I assembly	BP	0.012994	2	4	222	7062	GRMZM5G809292_P02, GRMZM2G325019_P01
GO:0042781	3'-tRNA processing endoribonuclease activity	MF	0.030727	1	0	223	7066	GRMZM5G802566_P06
GO:0006363	termination of RNA polymerase I transcription	BP	0.030727	1	0	223	7066	GRMZM5G800853_P01
GO:0009404	toxin metabolic process	BP	0.0322212	3	20	221	7046	GRMZM2G428168_P01, GRMZM2G363540_P01, GRMZM2G146475_P01
GO:0009407	toxin catabolic process	BP	0.0166064	3	15	221	7051	GRMZM2G428168_P01, GRMZM2G363540_P01, GRMZM2G146475_P01
GO:0016210	naringenin-chalcone synthase activity	MF	0.030727	1	0	223	7066	GRMZM2G422750_P03
GO:0009058	biosynthetic process	BP	0.0487105	68	1779	156	5287	GRMZM2G377797_P01, GRMZM5G800853_P01, GRMZM2G144730_P01, GRMZM2G134256_P01, GRMZM2G087326_P01, GRMZM6G741620_P02, GRMZM2G168330_P02, GRMZM2G135654_P01, GRMZM2G089421_P01, GRMZM2G054765_P01, GRMZM2G024647_P01, GRMZM2G095534_P04, GRMZM2G100146_P01, GRMZM2G078985_P01, GRMZM2G156068_P01, GRMZM2G018241_P01, GRMZM2G027728_P01, GRMZM5G870752_P01, GRMZM2G027723_P01, GRMZM2G114888_P02, GRMZM2G006229_P02, …
GO:1901576	organic substance biosynthetic process	BP	0.0312867	67	1708	157	5358	GRMZM2G377797_P01, GRMZM5G800853_P01, GRMZM2G144730_P01, GRMZM2G134256_P01, GRMZM2G087326_P01, GRMZM6G741620_P02, GRMZM2G168330_P02, GRMZM2G135654_P01, GRMZM2G089421_P01, GRMZM2G054765_P01, GRMZM2G024647_P01, GRMZM2G095534_P04, GRMZM2G100146_P01, GRMZM2G078985_P01, GRMZM2G156068_P01, GRMZM2G018241_P01, GRMZM2G027728_P01, GRMZM5G870752_P01, GRMZM2G027723_P01, GRMZM2G114888_P02, GRMZM2G006229_P02, …
GO:0044249	cellular biosynthetic process	BP	0.0196246	65	1610	159	5456	GRMZM2G377797_P01, GRMZM5G800853_P01, GRMZM2G144730_P01, GRMZM2G134256_P01, GRMZM2G087326_P01, GRMZM6G741620_P02, GRMZM2G168330_P02, GRMZM2G135654_P01, GRMZM2G089421_P01, GRMZM2G054765_P01, GRMZM2G024647_P01, GRMZM2G095534_P04, GRMZM2G100146_P01, GRMZM2G078985_P01, GRMZM2G156068_P01, GRMZM2G018241_P01, GRMZM2G027728_P01, GRMZM5G870752_P01, GRMZM2G027723_P01, GRMZM2G114888_P02, GRMZM2G006229_P02, …
GO:0009059	macromolecule biosynthetic process	BP	0.0047401	44	929	180	6137	GRMZM2G377797_P01, GRMZM5G800853_P01, GRMZM2G064640_P01, GRMZM2G436986_P01, GRMZM2G115901_P01, GRMZM2G336815_P01, GRMZM2G087326_P01, GRMZM2G445905_P03, GRMZM6G741620_P02, GRMZM2G023748_P01, GRMZM2G168330_P02, GRMZM2G135654_P01, GRMZM2G089421_P01, GRMZM2G054765_P01, GRMZM2G024647_P01, GRMZM2G095534_P04, GRMZM2G100146_P01, GRMZM2G078985_P01, GRMZM2G018241_P01, GRMZM2G043279_P01, GRMZM2G112535_P01, …
GO:0034645	cellular macromolecule biosynthetic process	BP	0.00347669	44	913	180	6153	GRMZM2G377797_P01, GRMZM5G800853_P01, GRMZM2G064640_P01, GRMZM2G436986_P01, GRMZM2G115901_P01, GRMZM2G336815_P01, GRMZM2G087326_P01, GRMZM2G445905_P03, GRMZM6G741620_P02, GRMZM2G023748_P01, GRMZM2G168330_P02, GRMZM2G135654_P01, GRMZM2G089421_P01, GRMZM2G054765_P01, GRMZM2G024647_P01, GRMZM2G095534_P04, GRMZM2G100146_P01, GRMZM2G078985_P01, GRMZM2G018241_P01, GRMZM2G043279_P01, GRMZM2G112535_P01, …
GO:0044271	cellular nitrogen compound biosynthetic process	BP	0.0201102	47	1098	177	5968	GRMZM2G377797_P01, GRMZM5G800853_P01, GRMZM2G064640_P01, GRMZM2G115901_P01, GRMZM2G144730_P01, GRMZM2G336815_P01, GRMZM2G134256_P01, GRMZM6G741620_P02, GRMZM2G023748_P01, GRMZM2G168330_P02, GRMZM2G135654_P01, GRMZM2G127361_P01, GRMZM2G089421_P01, GRMZM2G054765_P01, GRMZM2G024647_P01, GRMZM2G095534_P04, GRMZM2G100146_P01, GRMZM2G078985_P01, AC194341.4_FGP002, GRMZM2G156068_P01, GRMZM2G043279_P01, …
GO:0044085	cellular component biogenesis	BP	8.89238e-05	31	460	193	6606	GRMZM2G377797_P01, GRMZM2G336815_P01, GRMZM2G063896_P01, GRMZM2G107588_P01, GRMZM2G087326_P01, GRMZM2G445905_P03, GRMZM2G023748_P01, GRMZM2G168330_P02, GRMZM2G135654_P01, GRMZM2G024647_P01, GRMZM2G150030_P01, GRMZM2G060160_P01, GRMZM2G078985_P01, GRMZM2G043279_P01, GRMZM5G870752_P01, GRMZM6G101378_P01, GRMZM2G156673_P01, GRMZM2G062210_P01, GRMZM2G068471_P01, GRMZM2G027862_P01, GRMZM2G053652_P02, …
GO:0071840	cellular component organization or biogenesis	BP	0.00674036	45	975	179	6091	GRMZM2G377797_P01, GRMZM2G331566_P02, GRMZM2G336815_P01, GRMZM2G063896_P01, GRMZM2G107588_P01, GRMZM2G087326_P01, GRMZM2G445905_P03, GRMZM2G149273_P01, GRMZM2G330772_P02, GRMZM2G023748_P01, GRMZM2G060870_P02, GRMZM2G168330_P02, GRMZM2G135654_P01, GRMZM2G024647_P01, GRMZM2G150030_P01, GRMZM2G060160_P01, GRMZM2G078985_P01, GRMZM2G018241_P01, GRMZM2G043279_P01, GRMZM5G870752_P01, GRMZM2G027723_P01, …
GO:0005198	structural molecule activity	MF	2.28313e-07	28	282	196	6784	GRMZM2G377797_P01, GRMZM2G064640_P01, GRMZM2G115901_P01, GRMZM6G741620_P02, GRMZM2G023748_P01, GRMZM2G168330_P02, GRMZM2G135654_P01, GRMZM2G089421_P01, GRMZM2G024647_P01, GRMZM2G078985_P01, GRMZM2G043279_P01, GRMZM2G027728_P01, GRMZM5G870752_P01, GRMZM2G172932_P03, GRMZM2G084757_P01, GRMZM2G114888_P02, GRMZM2G156673_P01, GRMZM2G108348_P03, GRMZM5G811749_P01, GRMZM2G013798_P01, GRMZM2G053652_P02, …
GO:0003735	structural constituent of ribosome	MF	3.69247e-09	27	213	197	6853	GRMZM2G377797_P01, GRMZM2G064640_P01, GRMZM2G115901_P01, GRMZM6G741620_P02, GRMZM2G023748_P01, GRMZM2G168330_P02, GRMZM2G135654_P01, GRMZM2G089421_P01, GRMZM2G024647_P01, GRMZM2G078985_P01, GRMZM2G043279_P01, GRMZM2G027728_P01, GRMZM5G870752_P01, GRMZM2G084757_P01, GRMZM2G114888_P02, GRMZM2G156673_P01, GRMZM2G108348_P03, GRMZM5G811749_P01, GRMZM2G013798_P01, GRMZM2G053652_P02, GRMZM2G142097_P02, …
GO:0043604	amide biosynthetic process	BP	0.000847367	29	480	195	6586	GRMZM2G377797_P01, GRMZM2G064640_P01, GRMZM2G115901_P01, GRMZM2G336815_P01, GRMZM6G741620_P02, GRMZM2G023748_P01, GRMZM2G168330_P02, GRMZM2G135654_P01, GRMZM2G089421_P01, GRMZM2G024647_P01, GRMZM2G095534_P04, GRMZM2G078985_P01, GRMZM2G043279_P01, GRMZM2G027728_P01, GRMZM5G870752_P01, GRMZM2G084757_P01, GRMZM2G114888_P02, GRMZM2G156673_P01, GRMZM2G108348_P03, GRMZM2G101900_P02, GRMZM5G811749_P01, …
GO:0043043	peptide biosynthetic process	BP	0.000469269	28	439	196	6627	GRMZM2G377797_P01, GRMZM2G064640_P01, GRMZM2G115901_P01, GRMZM2G336815_P01, GRMZM6G741620_P02, GRMZM2G023748_P01, GRMZM2G168330_P02, GRMZM2G135654_P01, GRMZM2G089421_P01, GRMZM2G024647_P01, GRMZM2G095534_P04, GRMZM2G078985_P01, GRMZM2G043279_P01, GRMZM2G027728_P01, GRMZM5G870752_P01, GRMZM2G084757_P01, GRMZM2G114888_P02, GRMZM2G156673_P01, GRMZM2G108348_P03, GRMZM5G811749_P01, GRMZM2G013798_P01, …
GO:0006412	translation	BP	0.000408485	28	435	196	6631	GRMZM2G377797_P01, GRMZM2G064640_P01, GRMZM2G115901_P01, GRMZM2G336815_P01, GRMZM6G741620_P02, GRMZM2G023748_P01, GRMZM2G168330_P02, GRMZM2G135654_P01, GRMZM2G089421_P01, GRMZM2G024647_P01, GRMZM2G095534_P04, GRMZM2G078985_P01, GRMZM2G043279_P01, GRMZM2G027728_P01, GRMZM5G870752_P01, GRMZM2G084757_P01, GRMZM2G114888_P02, GRMZM2G156673_P01, GRMZM2G108348_P03, GRMZM5G811749_P01, GRMZM2G013798_P01, …
GO:0043603	cellular amide metabolic process	BP	0.000719894	33	569	191	6497	GRMZM2G377797_P01, GRMZM2G064640_P01, GRMZM2G115901_P01, GRMZM2G336815_P01, GRMZM2G428168_P01, GRMZM6G741620_P02, GRMZM2G023748_P01, GRMZM2G168330_P02, GRMZM2G135654_P01, GRMZM2G089421_P01, GRMZM2G024647_P01, GRMZM2G095534_P04, GRMZM2G078985_P01, GRMZM2G146475_P01, GRMZM2G043279_P01, GRMZM2G027728_P01, GRMZM5G870752_P01, GRMZM2G084757_P01, GRMZM2G363540_P01, GRMZM2G114888_P02, GRMZM2G156673_P01, …
GO:0006518	peptide metabolic process	BP	0.000207187	32	506	192	6560	GRMZM2G377797_P01, GRMZM2G064640_P01, GRMZM2G115901_P01, GRMZM2G336815_P01, GRMZM2G428168_P01, GRMZM6G741620_P02, GRMZM2G023748_P01, GRMZM2G168330_P02, GRMZM2G135654_P01, GRMZM2G089421_P01, GRMZM2G024647_P01, GRMZM2G095534_P04, GRMZM2G078985_P01, GRMZM2G146475_P01, GRMZM2G043279_P01, GRMZM2G027728_P01, GRMZM5G870752_P01, GRMZM2G084757_P01, GRMZM2G363540_P01, GRMZM2G114888_P02, GRMZM2G156673_P01, …
GO:0031398	positive regulation of protein ubiquitination	BP	0.030727	1	0	223	7066	GRMZM2G175272_P01
GO:0031396	regulation of protein ubiquitination	BP	0.030727	1	0	223	7066	GRMZM2G175272_P01
GO:1903322	positive regulation of protein modification by small protein conjugation or removal	BP	0.030727	1	0	223	7066	GRMZM2G175272_P01
GO:1903320	regulation of protein modification by small protein conjugation or removal	BP	0.030727	1	0	223	7066	GRMZM2G175272_P01
GO:0051438	regulation of ubiquitin-protein transferase activity	BP	0.030727	1	0	223	7066	GRMZM2G175272_P01
GO:0051443	positive regulation of ubiquitin-protein transferase activity	BP	0.030727	1	0	223	7066	GRMZM2G175272_P01
GO:1901136	carbohydrate derivative catabolic process	BP	0.0442479	3	23	221	7043	GRMZM2G168364_P01, GRMZM2G099454_P02, GRMZM2G162359_P01
GO:0006040	amino sugar metabolic process	BP	0.0286513	3	19	221	7047	GRMZM2G168364_P01, GRMZM2G099454_P02, GRMZM2G162359_P01
GO:0006022	aminoglycan metabolic process	BP	0.0221808	3	17	221	7049	GRMZM2G168364_P01, GRMZM2G099454_P02, GRMZM2G162359_P01
GO:1901072	glucosamine-containing compound catabolic process	BP	0.011922	3	13	221	7053	GRMZM2G168364_P01, GRMZM2G099454_P02, GRMZM2G162359_P01
GO:1901071	glucosamine-containing compound metabolic process	BP	0.011922	3	13	221	7053	GRMZM2G168364_P01, GRMZM2G099454_P02, GRMZM2G162359_P01
GO:0046348	amino sugar catabolic process	BP	0.011922	3	13	221	7053	GRMZM2G168364_P01, GRMZM2G099454_P02, GRMZM2G162359_P01
GO:0006026	aminoglycan catabolic process	BP	0.011922	3	13	221	7053	GRMZM2G168364_P01, GRMZM2G099454_P02, GRMZM2G162359_P01
GO:0006032	chitin catabolic process	BP	0.011922	3	13	221	7053	GRMZM2G168364_P01, GRMZM2G099454_P02, GRMZM2G162359_P01
GO:0006030	chitin metabolic process	BP	0.011922	3	13	221	7053	GRMZM2G168364_P01, GRMZM2G099454_P02, GRMZM2G162359_P01
GO:0004568	chitinase activity	MF	0.011922	3	13	221	7053	GRMZM2G168364_P01, GRMZM2G099454_P02, GRMZM2G162359_P01
GO:0016998	cell wall macromolecule catabolic process	BP	0.029347	2	7	222	7059	GRMZM2G168364_P01, GRMZM2G099454_P02
GO:0000028	ribosomal small subunit assembly	BP	0.00118045	4	12	220	7054	GRMZM2G156673_P01, GRMZM2G446960_P01, GRMZM2G078985_P01, GRMZM5G844628_P01
GO:0042274	ribosomal small subunit biogenesis	BP	0.000434666	6	27	218	7039	GRMZM2G156673_P01, GRMZM2G446960_P01, GRMZM2G053652_P02, GRMZM2G078985_P01, GRMZM2G377797_P01, GRMZM5G844628_P01
GO:0019843	rRNA binding	MF	0.00987811	6	54	218	7012	GRMZM2G156673_P01, GRMZM2G078985_P01, GRMZM2G108348_P03, GRMZM2G064640_P01, GRMZM2G142097_P02, GRMZM5G844628_P01
GO:0003729	mRNA binding	MF	0.0064335	5	34	219	7032	GRMZM2G156673_P01, GRMZM2G078985_P01, GRMZM2G090422_P01, GRMZM5G844628_P01, GRMZM2G043279_P01
GO:0015986	ATP synthesis coupled proton transport	BP	0.0141539	3	14	221	7052	GRMZM2G156068_P01, GRMZM2G025171_P01, AC194341.4_FGP002
GO:0015985	energy coupled proton transport, down electrochemical gradient	BP	0.0141539	3	14	221	7052	GRMZM2G156068_P01, GRMZM2G025171_P01, AC194341.4_FGP002
GO:0046933	proton-transporting ATP synthase activity, rotational mechanism	MF	0.0359519	2	8	222	7058	GRMZM2G156068_P01, GRMZM2G025171_P01
GO:0007264	small GTPase mediated signal transduction	BP	0.030051	5	52	219	7014	GRMZM2G147726_P01, GRMZM2G061912_P01, GRMZM2G122805_P01, GRMZM2G124732_P01, GRMZM2G171060_P02
GO:0060918	auxin transport	BP	0.0359519	2	8	222	7058	GRMZM2G142097_P02, GRMZM2G074267_P01
GO:0009914	hormone transport	BP	0.0359519	2	8	222	7058	GRMZM2G142097_P02, GRMZM2G074267_P01
GO:0009926	auxin polar transport	BP	0.0359519	2	8	222	7058	GRMZM2G142097_P02, GRMZM2G074267_P01
GO:0035266	meristem growth	BP	0.0430669	2	9	222	7057	GRMZM2G142097_P02, GRMZM2G059392_P02
GO:0010075	regulation of meristem growth	BP	0.0359519	2	8	222	7058	GRMZM2G142097_P02, GRMZM2G059392_P02
GO:0042737	drug catabolic process	BP	0.00823343	9	105	215	6961	GRMZM2G127361_P01, GRMZM2G036708_P01, GRMZM2G399183_P01, GRMZM2G168364_P01, GRMZM2G099454_P02, GRMZM2G162359_P01, GRMZM2G108123_P01, GRMZM2G149273_P01, GRMZM2G130904_P01
GO:0035671	enone reductase activity	MF	0.030727	1	0	223	7066	GRMZM2G127361_P01
GO:0035798	2-alkenal reductase (NADP+) activity	MF	0.030727	1	0	223	7066	GRMZM2G127361_P01
GO:0003960	NADPH:quinone reductase activity	MF	0.030727	1	0	223	7066	GRMZM2G127361_P01
GO:0048193	Golgi vesicle transport	BP	0.0340392	6	73	218	6993	GRMZM2G125149_P01, GRMZM2G039419_P01, GRMZM2G053319_P01, GRMZM5G837058_P01, GRMZM2G127756_P01, GRMZM2G086636_P01
GO:0090407	organophosphate biosynthetic process	BP	0.040731	17	333	207	6733	GRMZM2G114888_P02, GRMZM2G144730_P01, GRMZM5G819807_P01, GRMZM2G101900_P02, GRMZM2G089365_P01, GRMZM2G134256_P01, GRMZM2G011491_P01, GRMZM2G127361_P01, GRMZM2G068471_P01, GRMZM2G054765_P01, GRMZM2G036708_P01, GRMZM2G025171_P01, AC194341.4_FGP002, GRMZM2G060886_P02, GRMZM2G156068_P01, GRMZM2G080375_P01, GRMZM2G104983_P01
GO:0006753	nucleoside phosphate metabolic process	BP	0.0281273	16	293	208	6773	GRMZM2G114888_P02, GRMZM2G144730_P01, GRMZM2G101900_P02, GRMZM2G089365_P01, GRMZM2G134256_P01, GRMZM2G011491_P01, GRMZM2G127361_P01, GRMZM2G068471_P01, GRMZM2G054765_P01, GRMZM2G036708_P01, GRMZM2G025171_P01, AC194341.4_FGP002, GRMZM2G148769_P02, GRMZM2G156068_P01, GRMZM2G080375_P01, GRMZM2G104983_P01
GO:0009117	nucleotide metabolic process	BP	0.0281273	16	293	208	6773	GRMZM2G114888_P02, GRMZM2G144730_P01, GRMZM2G101900_P02, GRMZM2G089365_P01, GRMZM2G134256_P01, GRMZM2G011491_P01, GRMZM2G127361_P01, GRMZM2G068471_P01, GRMZM2G054765_P01, GRMZM2G036708_P01, GRMZM2G025171_P01, AC194341.4_FGP002, GRMZM2G148769_P02, GRMZM2G156068_P01, GRMZM2G080375_P01, GRMZM2G104983_P01
GO:1901293	nucleoside phosphate biosynthetic process	BP	0.0103768	14	214	210	6852	GRMZM2G114888_P02, GRMZM2G144730_P01, GRMZM2G101900_P02, GRMZM2G089365_P01, GRMZM2G134256_P01, GRMZM2G011491_P01, GRMZM2G068471_P01, GRMZM2G054765_P01, GRMZM2G036708_P01, GRMZM2G025171_P01, AC194341.4_FGP002, GRMZM2G156068_P01, GRMZM2G080375_P01, GRMZM2G104983_P01
GO:0009165	nucleotide biosynthetic process	BP	0.0100057	14	213	210	6853	GRMZM2G114888_P02, GRMZM2G144730_P01, GRMZM2G101900_P02, GRMZM2G089365_P01, GRMZM2G134256_P01, GRMZM2G011491_P01, GRMZM2G068471_P01, GRMZM2G054765_P01, GRMZM2G036708_P01, GRMZM2G025171_P01, AC194341.4_FGP002, GRMZM2G156068_P01, GRMZM2G080375_P01, GRMZM2G104983_P01
GO:0009259	ribonucleotide metabolic process	BP	0.0296358	13	223	211	6843	GRMZM2G114888_P02, GRMZM2G144730_P01, GRMZM2G101900_P02, GRMZM2G089365_P01, GRMZM2G134256_P01, GRMZM2G011491_P01, GRMZM2G068471_P01, GRMZM2G036708_P01, GRMZM2G025171_P01, AC194341.4_FGP002, GRMZM2G156068_P01, GRMZM2G080375_P01, GRMZM2G104983_P01
GO:0009260	ribonucleotide biosynthetic process	BP	0.00609321	13	179	211	6887	GRMZM2G114888_P02, GRMZM2G144730_P01, GRMZM2G101900_P02, GRMZM2G089365_P01, GRMZM2G134256_P01, GRMZM2G011491_P01, GRMZM2G068471_P01, GRMZM2G036708_P01, GRMZM2G025171_P01, AC194341.4_FGP002, GRMZM2G156068_P01, GRMZM2G080375_P01, GRMZM2G104983_P01
GO:0046390	ribose phosphate biosynthetic process	BP	0.00609321	13	179	211	6887	GRMZM2G114888_P02, GRMZM2G144730_P01, GRMZM2G101900_P02, GRMZM2G089365_P01, GRMZM2G134256_P01, GRMZM2G011491_P01, GRMZM2G068471_P01, GRMZM2G036708_P01, GRMZM2G025171_P01, AC194341.4_FGP002, GRMZM2G156068_P01, GRMZM2G080375_P01, GRMZM2G104983_P01
GO:0019693	ribose phosphate metabolic process	BP	0.0258881	14	242	210	6824	GRMZM2G114888_P02, GRMZM2G144730_P01, GRMZM2G101900_P02, GRMZM2G089365_P01, GRMZM2G134256_P01, GRMZM2G011491_P01, GRMZM2G068471_P01, GRMZM2G036708_P01, GRMZM2G025171_P01, AC194341.4_FGP002, GRMZM2G148769_P02, GRMZM2G156068_P01, GRMZM2G080375_P01, GRMZM2G104983_P01
GO:0009218	pyrimidine ribonucleotide metabolic process	BP	0.0420581	4	39	220	7027	GRMZM2G114888_P02, GRMZM2G101900_P02, GRMZM2G011491_P01, GRMZM2G104983_P01
GO:0009220	pyrimidine ribonucleotide biosynthetic process	BP	0.0420581	4	39	220	7027	GRMZM2G114888_P02, GRMZM2G101900_P02, GRMZM2G011491_P01, GRMZM2G104983_P01
GO:0010387	COP9 signalosome assembly	BP	0.00541391	2	2	222	7064	GRMZM2G107588_P01, GRMZM2G062210_P01
GO:0098754	detoxification	BP	0.0226728	8	105	216	6961	GRMZM2G106928_P01, GRMZM2G036708_P01, GRMZM2G363540_P01, GRMZM2G146475_P01, GRMZM2G428168_P01, GRMZM2G108123_P01, GRMZM2G149273_P01, GRMZM2G130904_P01
GO:0071486	cellular response to high light intensity	BP	0.030727	1	0	223	7066	GRMZM2G106928_P01
GO:0071484	cellular response to light intensity	BP	0.030727	1	0	223	7066	GRMZM2G106928_P01
GO:0006788	heme oxidation	BP	0.030727	1	0	223	7066	GRMZM2G101004_P01
GO:0004392	heme oxygenase (decyclizing) activity	MF	0.030727	1	0	223	7066	GRMZM2G101004_P01
GO:0006450	regulation of translational fidelity	BP	0.0192817	3	16	221	7050	GRMZM2G100260_P02, GRMZM2G064640_P01, GRMZM2G108348_P03
GO:0051500	D-tyrosyl-tRNA(Tyr) deacylase activity	MF	0.030727	1	0	223	7066	GRMZM2G100260_P02
GO:0048830	adventitious root development	BP	0.030727	1	0	223	7066	GRMZM2G074267_P01
GO:0000463	maturation of LSU-rRNA from tricistronic rRNA transcript (SSU-rRNA, 5.8S rRNA, LSU-rRNA)	BP	0.0232912	2	6	222	7060	GRMZM2G068471_P01, GRMZM2G043279_P01
GO:0009124	nucleoside monophosphate biosynthetic process	BP	0.0293846	10	154	214	6912	GRMZM2G068471_P01, GRMZM2G036708_P01, GRMZM2G025171_P01, GRMZM2G144730_P01, AC194341.4_FGP002, GRMZM2G101900_P02, GRMZM2G089365_P01, GRMZM2G134256_P01, GRMZM2G156068_P01, GRMZM2G080375_P01
GO:0009156	ribonucleoside monophosphate biosynthetic process	BP	0.026292	10	151	214	6915	GRMZM2G068471_P01, GRMZM2G036708_P01, GRMZM2G025171_P01, GRMZM2G144730_P01, AC194341.4_FGP002, GRMZM2G101900_P02, GRMZM2G089365_P01, GRMZM2G134256_P01, GRMZM2G156068_P01, GRMZM2G080375_P01
GO:0009152	purine ribonucleotide biosynthetic process	BP	0.0473412	9	145	215	6921	GRMZM2G068471_P01, GRMZM2G036708_P01, GRMZM2G025171_P01, GRMZM2G144730_P01, AC194341.4_FGP002, GRMZM2G089365_P01, GRMZM2G134256_P01, GRMZM2G156068_P01, GRMZM2G080375_P01
GO:0009127	purine nucleoside monophosphate biosynthetic process	BP	0.0293273	9	132	215	6934	GRMZM2G068471_P01, GRMZM2G036708_P01, GRMZM2G025171_P01, GRMZM2G144730_P01, AC194341.4_FGP002, GRMZM2G089365_P01, GRMZM2G134256_P01, GRMZM2G156068_P01, GRMZM2G080375_P01
GO:0009168	purine ribonucleoside monophosphate biosynthetic process	BP	0.0293273	9	132	215	6934	GRMZM2G068471_P01, GRMZM2G036708_P01, GRMZM2G025171_P01, GRMZM2G144730_P01, AC194341.4_FGP002, GRMZM2G089365_P01, GRMZM2G134256_P01, GRMZM2G156068_P01, GRMZM2G080375_P01
GO:0045903	positive regulation of translational fidelity	BP	0.00276292	2	1	222	7065	GRMZM2G064640_P01, GRMZM2G108348_P03
GO:0005544	calcium-dependent phospholipid binding	MF	0.00810778	3	11	221	7055	GRMZM2G061950_P01, GRMZM2G009136_P01, GRMZM2G064993_P01
GO:0010083	regulation of vegetative meristem growth	BP	0.030727	1	0	223	7066	GRMZM2G059392_P02
GO:0010076	maintenance of floral meristem identity	BP	0.030727	1	0	223	7066	GRMZM2G059392_P02
GO:1905613	regulation of developmental vegetative growth	BP	0.030727	1	0	223	7066	GRMZM2G059392_P02
GO:0010448	vegetative meristem growth	BP	0.030727	1	0	223	7066	GRMZM2G059392_P02
GO:0080186	developmental vegetative growth	BP	0.030727	1	0	223	7066	GRMZM2G059392_P02
GO:0032880	regulation of protein localization	BP	0.029347	2	7	222	7059	GRMZM2G036708_P01, GRMZM5G819807_P01
GO:0009142	nucleoside triphosphate biosynthetic process	BP	0.0398208	8	118	216	6948	GRMZM2G036708_P01, GRMZM2G025171_P01, GRMZM2G144730_P01, AC194341.4_FGP002, GRMZM2G089365_P01, GRMZM2G134256_P01, GRMZM2G156068_P01, GRMZM2G080375_P01
GO:0009206	purine ribonucleoside triphosphate biosynthetic process	BP	0.0324382	8	113	216	6953	GRMZM2G036708_P01, GRMZM2G025171_P01, GRMZM2G144730_P01, AC194341.4_FGP002, GRMZM2G089365_P01, GRMZM2G134256_P01, GRMZM2G156068_P01, GRMZM2G080375_P01
GO:0009145	purine nucleoside triphosphate biosynthetic process	BP	0.0324382	8	113	216	6953	GRMZM2G036708_P01, GRMZM2G025171_P01, GRMZM2G144730_P01, AC194341.4_FGP002, GRMZM2G089365_P01, GRMZM2G134256_P01, GRMZM2G156068_P01, GRMZM2G080375_P01
GO:0006754	ATP biosynthetic process	BP	0.0260517	8	108	216	6958	GRMZM2G036708_P01, GRMZM2G025171_P01, GRMZM2G144730_P01, AC194341.4_FGP002, GRMZM2G089365_P01, GRMZM2G134256_P01, GRMZM2G156068_P01, GRMZM2G080375_P01
GO:0009201	ribonucleoside triphosphate biosynthetic process	BP	0.0382619	8	117	216	6949	GRMZM2G036708_P01, GRMZM2G025171_P01, GRMZM2G144730_P01, AC194341.4_FGP002, GRMZM2G089365_P01, GRMZM2G134256_P01, GRMZM2G156068_P01, GRMZM2G080375_P01
GO:0019500	cyanide catabolic process	BP	0.030727	1	0	223	7066	GRMZM2G036708_P01
GO:0019499	cyanide metabolic process	BP	0.030727	1	0	223	7066	GRMZM2G036708_P01
GO:0051410	detoxification of nitrogen compound	BP	0.030727	1	0	223	7066	GRMZM2G036708_P01
GO:0050017	L-3-cyanoalanine synthase activity	MF	0.030727	1	0	223	7066	GRMZM2G036708_P01
GO:0042794	plastid rRNA transcription	BP	0.030727	1	0	223	7066	GRMZM2G029933_P01
GO:0004310	farnesyl-diphosphate farnesyltransferase activity	MF	0.030727	1	0	223	7066	GRMZM2G029396_P01
GO:0071669	plant-type cell wall organization or biogenesis	BP	0.00403972	6	44	218	7022	GRMZM2G027862_P01, GRMZM2G142097_P02, GRMZM2G087326_P01, GRMZM2G445905_P03, GRMZM2G108123_P01, GRMZM2G149273_P01
GO:0042546	cell wall biogenesis	BP	0.0307967	4	35	220	7031	GRMZM2G027862_P01, GRMZM2G142097_P02, GRMZM2G087326_P01, GRMZM2G445905_P03
GO:0009832	plant-type cell wall biogenesis	BP	0.00285329	4	16	220	7050	GRMZM2G027862_P01, GRMZM2G142097_P02, GRMZM2G087326_P01, GRMZM2G445905_P03
GO:0051273	beta-glucan metabolic process	BP	0.000861567	7	44	217	7022	GRMZM2G027862_P01, GRMZM2G027723_P01, GRMZM2G110145_P01, GRMZM2G331566_P02, GRMZM2G087326_P01, GRMZM2G018241_P01, GRMZM2G445905_P03
GO:0030243	cellulose metabolic process	BP	0.000253818	7	35	217	7031	GRMZM2G027862_P01, GRMZM2G027723_P01, GRMZM2G110145_P01, GRMZM2G331566_P02, GRMZM2G087326_P01, GRMZM2G018241_P01, GRMZM2G445905_P03
GO:0051274	beta-glucan biosynthetic process	BP	0.00185233	6	37	218	7029	GRMZM2G027862_P01, GRMZM2G027723_P01, GRMZM2G110145_P01, GRMZM2G087326_P01, GRMZM2G018241_P01, GRMZM2G445905_P03
GO:0030244	cellulose biosynthetic process	BP	0.000707817	6	30	218	7036	GRMZM2G027862_P01, GRMZM2G027723_P01, GRMZM2G110145_P01, GRMZM2G087326_P01, GRMZM2G018241_P01, GRMZM2G445905_P03
GO:0044264	cellular polysaccharide metabolic process	BP	0.00982837	10	128	214	6938	GRMZM2G027862_P01, GRMZM2G027723_P01, GRMZM2G000660_P01, GRMZM2G110145_P01, GRMZM2G025171_P01, GRMZM2G436986_P01, GRMZM2G331566_P02, GRMZM2G087326_P01, GRMZM2G018241_P01, GRMZM2G445905_P03
GO:0044042	glucan metabolic process	BP	0.00497636	10	115	214	6951	GRMZM2G027862_P01, GRMZM2G027723_P01, GRMZM2G000660_P01, GRMZM2G110145_P01, GRMZM2G025171_P01, GRMZM2G436986_P01, GRMZM2G331566_P02, GRMZM2G087326_P01, GRMZM2G018241_P01, GRMZM2G445905_P03
GO:0006073	cellular glucan metabolic process	BP	0.00394777	10	111	214	6955	GRMZM2G027862_P01, GRMZM2G027723_P01, GRMZM2G000660_P01, GRMZM2G110145_P01, GRMZM2G025171_P01, GRMZM2G436986_P01, GRMZM2G331566_P02, GRMZM2G087326_P01, GRMZM2G018241_P01, GRMZM2G445905_P03
GO:0005976	polysaccharide metabolic process	BP	0.00751134	12	163	212	6903	GRMZM2G027862_P01, GRMZM2G027723_P01, GRMZM2G000660_P01, GRMZM2G110145_P01, GRMZM2G025171_P01, GRMZM2G436986_P01, GRMZM2G099454_P02, GRMZM2G331566_P02, GRMZM2G162359_P01, GRMZM2G087326_P01, GRMZM2G018241_P01, GRMZM2G445905_P03
GO:0034637	cellular carbohydrate biosynthetic process	BP	0.0192361	9	122	215	6944	GRMZM2G027862_P01, GRMZM2G027723_P01, GRMZM2G000660_P01, GRMZM2G110145_P01, GRMZM2G025171_P01, GRMZM2G436986_P01, GRMZM2G087326_P01, GRMZM2G018241_P01, GRMZM2G445905_P03
GO:0000271	polysaccharide biosynthetic process	BP	0.00918819	9	107	215	6959	GRMZM2G027862_P01, GRMZM2G027723_P01, GRMZM2G000660_P01, GRMZM2G110145_P01, GRMZM2G025171_P01, GRMZM2G436986_P01, GRMZM2G087326_P01, GRMZM2G018241_P01, GRMZM2G445905_P03
GO:0033692	cellular polysaccharide biosynthetic process	BP	0.00694534	9	102	215	6964	GRMZM2G027862_P01, GRMZM2G027723_P01, GRMZM2G000660_P01, GRMZM2G110145_P01, GRMZM2G025171_P01, GRMZM2G436986_P01, GRMZM2G087326_P01, GRMZM2G018241_P01, GRMZM2G445905_P03
GO:0009250	glucan biosynthetic process	BP	0.0022892	9	85	215	6981	GRMZM2G027862_P01, GRMZM2G027723_P01, GRMZM2G000660_P01, GRMZM2G110145_P01, GRMZM2G025171_P01, GRMZM2G436986_P01, GRMZM2G087326_P01, GRMZM2G018241_P01, GRMZM2G445905_P03
GO:0051211	anisotropic cell growth	BP	0.030727	1	0	223	7066	GRMZM2G027862_P01
GO:0071554	cell wall organization or biogenesis	BP	0.000458877	13	131	211	6935	GRMZM2G027723_P01, GRMZM2G110145_P01, GRMZM2G331566_P02, GRMZM2G162359_P01, GRMZM2G087326_P01, GRMZM2G445905_P03, GRMZM2G108123_P01, GRMZM2G149273_P01, GRMZM2G027862_P01, GRMZM2G142097_P02, GRMZM2G168364_P01, GRMZM2G099454_P02, GRMZM2G018241_P01
GO:0071555	cell wall organization	BP	0.00284126	9	88	215	6978	GRMZM2G027723_P01, GRMZM2G110145_P01, GRMZM2G142097_P02, GRMZM2G331566_P02, GRMZM2G087326_P01, GRMZM2G018241_P01, GRMZM2G445905_P03, GRMZM2G108123_P01, GRMZM2G149273_P01
GO:0045229	external encapsulating structure organization	BP	0.00399044	9	93	215	6973	GRMZM2G027723_P01, GRMZM2G110145_P01, GRMZM2G142097_P02, GRMZM2G331566_P02, GRMZM2G087326_P01, GRMZM2G018241_P01, GRMZM2G445905_P03, GRMZM2G108123_P01, GRMZM2G149273_P01
GO:0016759	cellulose synthase activity	MF	0.000681453	4	10	220	7056	GRMZM2G027723_P01, GRMZM2G110145_P01, GRMZM2G018241_P01, GRMZM2G445905_P03
GO:0016760	cellulose synthase (UDP-forming) activity	MF	0.000681453	4	10	220	7056	GRMZM2G027723_P01, GRMZM2G110145_P01, GRMZM2G018241_P01, GRMZM2G445905_P03
GO:0001882	nucleoside binding	MF	0.00429156	12	151	212	6915	GRMZM2G027021_P01, GRMZM2G172932_P03, GRMZM2G068471_P01, GRMZM2G122805_P01, GRMZM2G163325_P01, GRMZM2G070899_P02, GRMZM2G124732_P01, GRMZM2G086636_P01, GRMZM2G302233_P01, GRMZM2G147726_P01, GRMZM2G061912_P01, GRMZM2G171060_P02
GO:0032549	ribonucleoside binding	MF	0.00429156	12	151	212	6915	GRMZM2G027021_P01, GRMZM2G172932_P03, GRMZM2G068471_P01, GRMZM2G122805_P01, GRMZM2G163325_P01, GRMZM2G070899_P02, GRMZM2G124732_P01, GRMZM2G086636_P01, GRMZM2G302233_P01, GRMZM2G147726_P01, GRMZM2G061912_P01, GRMZM2G171060_P02
GO:0001883	purine nucleoside binding	MF	0.00350859	12	147	212	6919	GRMZM2G027021_P01, GRMZM2G172932_P03, GRMZM2G068471_P01, GRMZM2G122805_P01, GRMZM2G163325_P01, GRMZM2G070899_P02, GRMZM2G124732_P01, GRMZM2G086636_P01, GRMZM2G302233_P01, GRMZM2G147726_P01, GRMZM2G061912_P01, GRMZM2G171060_P02
GO:0005525	GTP binding	MF	0.00350859	12	147	212	6919	GRMZM2G027021_P01, GRMZM2G172932_P03, GRMZM2G068471_P01, GRMZM2G122805_P01, GRMZM2G163325_P01, GRMZM2G070899_P02, GRMZM2G124732_P01, GRMZM2G086636_P01, GRMZM2G302233_P01, GRMZM2G147726_P01, GRMZM2G061912_P01, GRMZM2G171060_P02
GO:0019001	guanyl nucleotide binding	MF	0.00350859	12	147	212	6919	GRMZM2G027021_P01, GRMZM2G172932_P03, GRMZM2G068471_P01, GRMZM2G122805_P01, GRMZM2G163325_P01, GRMZM2G070899_P02, GRMZM2G124732_P01, GRMZM2G086636_P01, GRMZM2G302233_P01, GRMZM2G147726_P01, GRMZM2G061912_P01, GRMZM2G171060_P02
GO:0032561	guanyl ribonucleotide binding	MF	0.00350859	12	147	212	6919	GRMZM2G027021_P01, GRMZM2G172932_P03, GRMZM2G068471_P01, GRMZM2G122805_P01, GRMZM2G163325_P01, GRMZM2G070899_P02, GRMZM2G124732_P01, GRMZM2G086636_P01, GRMZM2G302233_P01, GRMZM2G147726_P01, GRMZM2G061912_P01, GRMZM2G171060_P02
GO:0032550	purine ribonucleoside binding	MF	0.00350859	12	147	212	6919	GRMZM2G027021_P01, GRMZM2G172932_P03, GRMZM2G068471_P01, GRMZM2G122805_P01, GRMZM2G163325_P01, GRMZM2G070899_P02, GRMZM2G124732_P01, GRMZM2G086636_P01, GRMZM2G302233_P01, GRMZM2G147726_P01, GRMZM2G061912_P01, GRMZM2G171060_P02
GO:0071826	ribonucleoprotein complex subunit organization	BP	0.00246278	9	86	215	6980	GRMZM2G024647_P01, GRMZM2G060160_P01, GRMZM2G027451_P04, GRMZM2G156673_P01, GRMZM2G336815_P01, GRMZM2G446960_P01, GRMZM2G078985_P01, GRMZM2G003384_P01, GRMZM5G844628_P01
GO:0022618	ribonucleoprotein complex assembly	BP	0.00182612	9	82	215	6984	GRMZM2G024647_P01, GRMZM2G060160_P01, GRMZM2G027451_P04, GRMZM2G156673_P01, GRMZM2G336815_P01, GRMZM2G446960_P01, GRMZM2G078985_P01, GRMZM2G003384_P01, GRMZM5G844628_P01
GO:0070925	organelle assembly	BP	0.0007629	7	43	217	7023	GRMZM2G024647_P01, GRMZM2G027451_P04, GRMZM2G156673_P01, GRMZM2G446960_P01, GRMZM2G078985_P01, GRMZM2G003384_P01, GRMZM5G844628_P01
GO:0042255	ribosome assembly	BP	3.29873e-05	7	24	217	7042	GRMZM2G024647_P01, GRMZM2G027451_P04, GRMZM2G156673_P01, GRMZM2G446960_P01, GRMZM2G078985_P01, GRMZM2G003384_P01, GRMZM5G844628_P01
GO:0000027	ribosomal large subunit assembly	BP	0.00512772	3	9	221	7057	GRMZM2G024647_P01, GRMZM2G003384_P01, GRMZM2G027451_P04
GO:1901566	organonitrogen compound biosynthetic process	BP	0.00956516	44	968	180	6098	GRMZM2G010044_P01, GRMZM2G377797_P01, GRMZM2G064640_P01, GRMZM2G115901_P01, GRMZM2G144730_P01, GRMZM2G336815_P01, GRMZM2G134256_P01, GRMZM6G741620_P02, GRMZM2G023748_P01, GRMZM2G168330_P02, GRMZM2G135654_P01, GRMZM2G127361_P01, GRMZM2G089421_P01, GRMZM2G024647_P01, GRMZM2G084942_P02, GRMZM2G095534_P04, GRMZM2G078985_P01, AC194341.4_FGP002, GRMZM2G156068_P01, GRMZM2G043279_P01, GRMZM2G080375_P01, …
GO:0005623	cell	CC	0.0371338	169	4927	55	2139
GO:0044464	cell part	CC	0.0343302	169	4919	55	2147
GO:0005737	cytoplasm	CC	0.0154395	146	4082	78	2984
GO:0043229	intracellular organelle	CC	0.0207671	141	3949	83	3117
GO:0043226	organelle	CC	0.0207671	141	3949	83	3117
GO:0044444	cytoplasmic part	CC	0.016018	133	3667	91	3399
GO:0044422	organelle part	CC	3.87544e-05	80	1665	144	5401
GO:0044446	intracellular organelle part	CC	3.71227e-05	80	1663	144	5403
GO:0009536	plastid	CC	0.0276367	73	1874	151	5192
GO:0032991	protein-containing complex	CC	0.00220886	53	1130	171	5936
GO:0009507	chloroplast	CC	0.00364117	51	1103	173	5963
GO:0043228	non-membrane-bounded organelle	CC	1.07699e-06	37	484	187	6582
GO:0043232	intracellular non-membrane-bounded organelle	CC	1.07699e-06	37	484	187	6582
GO:1990904	ribonucleoprotein complex	CC	7.66511e-07	34	416	190	6650
GO:0005829	cytosol	CC	0.0346637	33	747	191	6319
GO:0005840	ribosome	CC	1.64222e-08	27	230	197	6836
GO:0044391	ribosomal subunit	CC	1.93131e-11	26	151	198	6915
GO:0044445	cytosolic part	CC	4.99236e-09	23	157	201	6909
GO:0022626	cytosolic ribosome	CC	2.81019e-10	23	133	201	6933
GO:0009579	thylakoid	CC	0.0288687	16	294	208	6772
GO:0005794	Golgi apparatus	CC	0.00115322	15	184	209	6882
GO:0015934	large ribosomal subunit	CC	4.29742e-06	14	93	210	6973
GO:0022625	cytosolic large ribosomal subunit	CC	3.2974e-07	14	73	210	6993
GO:0044431	Golgi apparatus part	CC	0.000198912	12	103	212	6963
GO:0015935	small ribosomal subunit	CC	1.16224e-06	12	58	212	7008
GO:0005576	extracellular region	CC	0.035271	11	182	213	6884
GO:0098791	Golgi subcompartment	CC	0.000685282	10	86	214	6980
GO:0031410	cytoplasmic vesicle	CC	0.0219483	9	125	215	6941
GO:0097708	intracellular vesicle	CC	0.0219483	9	125	215	6941
GO:0031982	vesicle	CC	0.0219483	9	125	215	6941
GO:0022627	cytosolic small ribosomal subunit	CC	2.41922e-05	9	43	215	7023
GO:0005768	endosome	CC	0.0378107	6	75	218	6991
GO:0005802	trans-Golgi network	CC	0.0210792	5	47	219	7019
GO:0016469	proton-transporting two-sector ATPase complex	CC	0.0176587	4	29	220	7037
GO:0045259	proton-transporting ATP synthase complex	CC	0.00118045	4	12	220	7054
GO:0010319	stromule	CC	0.0286513	3	19	221	7047
GO:0005753	mitochondrial proton-transporting ATP synthase complex	CC	0.00209627	3	6	221	7060
GO:0000314	organellar small ribosomal subunit	CC	0.0430669	2	9	222	7057
GO:0005763	mitochondrial small ribosomal subunit	CC	0.0359519	2	8	222	7058
GO:0008180	COP9 signalosome	CC	0.0359519	2	8	222	7058
GO:0045261	proton-transporting ATP synthase complex, catalytic core F(1)	CC	0.0359519	2	8	222	7058
GO:0005795	Golgi stack	CC	0.029347	2	7	222	7059
GO:0030686	90S preribosome	CC	0.0178259	2	5	222	7061
GO:0000793	condensed chromosome	CC	0.012994	2	4	222	7062
GO:0000795	synaptonemal complex	CC	0.00541391	2	2	222	7064
GO:0000794	condensed nuclear chromosome	CC	0.00541391	2	2	222	7064
GO:0099086	synaptonemal structure	CC	0.00541391	2	2	222	7064
GO:0005797	Golgi medial cisterna	CC	0.030727	1	0	223	7066
GO:0009921	auxin efflux carrier complex	CC	0.030727	1	0	223	7066
GO:0070545	PeBoW complex	CC	0.030727	1	0	223	7066

## Sheet: third leaf overlap res
GO enrichment analysis of chilling tolerant line KR701- and chilling sensitive line hei8834-overlap responsive proteins at third leaf stage.
GO.ID	GO.Name	GO.Category	P.Value	Nr.Test	Nr.Reference	Non.Annot.Test	Non.Annot.Reference	SeqTest
GO:0051179	localization	BP	0.0486328	4	973	7	6306	GRMZM5G898755_P01, GRMZM2G075502_P01, GRMZM2G010868_P01, GRMZM2G014695_P01
GO:0051234	establishment of localization	BP	0.0456674	4	954	7	6325	GRMZM5G898755_P01, GRMZM2G075502_P01, GRMZM2G010868_P01, GRMZM2G014695_P01
GO:0006810	transport	BP	0.0395095	4	912	7	6367	GRMZM5G898755_P01, GRMZM2G075502_P01, GRMZM2G010868_P01, GRMZM2G014695_P01
GO:0006869	lipid transport	BP	0.00093989	2	29	9	7250	GRMZM5G898755_P01, GRMZM2G010868_P01
GO:0010876	lipid localization	BP	0.00093989	2	29	9	7250	GRMZM5G898755_P01, GRMZM2G010868_P01
GO:0008289	lipid binding	MF	0.0051313	2	71	9	7208	GRMZM5G898755_P01, GRMZM2G010868_P01
GO:0007267	cell-cell signaling	BP	0.0135059	1	8	10	7271	GRMZM2G122937_P03
GO:0048029	monosaccharide binding	MF	0.0253718	1	16	10	7263	GRMZM2G122937_P03
GO:0033293	monocarboxylic acid binding	MF	0.0194552	1	12	10	7267	GRMZM2G122937_P03
GO:0048032	galacturonate binding	MF	0.00150892	1	0	10	7279	GRMZM2G122937_P03
GO:0031072	heat shock protein binding	MF	0.0400216	1	26	10	7253	GRMZM2G098460_P01
GO:0006812	cation transport	BP	0.0327738	2	191	9	7088	GRMZM2G075502_P01, GRMZM2G014695_P01
GO:0030001	metal ion transport	BP	0.00674521	2	82	9	7197	GRMZM2G075502_P01, GRMZM2G014695_P01
GO:0065004	protein-DNA complex assembly	BP	0.0458252	1	30	10	7249	GRMZM2G069911_P01
GO:0071824	protein-DNA complex subunit organization	BP	0.0458252	1	30	10	7249	GRMZM2G069911_P01
GO:0006323	DNA packaging	BP	0.0385656	1	25	10	7254	GRMZM2G069911_P01
GO:0006333	chromatin assembly or disassembly	BP	0.0371077	1	24	10	7255	GRMZM2G069911_P01
GO:0031497	chromatin assembly	BP	0.0356478	1	23	10	7256	GRMZM2G069911_P01
GO:0034728	nucleosome organization	BP	0.0297879	1	19	10	7260	GRMZM2G069911_P01
GO:0006334	nucleosome assembly	BP	0.0297879	1	19	10	7260	GRMZM2G069911_P01
GO:0055076	transition metal ion homeostasis	BP	0.048715	1	32	10	7247	GRMZM2G014695_P01
GO:0006875	cellular metal ion homeostasis	BP	0.0429274	1	28	10	7251	GRMZM2G014695_P01
GO:0046916	cellular transition metal ion homeostasis	BP	0.0356478	1	23	10	7256	GRMZM2G014695_P01
GO:0051346	negative regulation of hydrolase activity	BP	0.0238957	1	15	10	7264	GRMZM2G011523_P01
GO:0052548	regulation of endopeptidase activity	BP	0.0209374	1	13	10	7266	GRMZM2G011523_P01
GO:0052547	regulation of peptidase activity	BP	0.0209374	1	13	10	7266	GRMZM2G011523_P01
GO:0010466	negative regulation of peptidase activity	BP	0.0209374	1	13	10	7266	GRMZM2G011523_P01
GO:0045861	negative regulation of proteolysis	BP	0.0209374	1	13	10	7266	GRMZM2G011523_P01
GO:0010951	negative regulation of endopeptidase activity	BP	0.0209374	1	13	10	7266	GRMZM2G011523_P01
GO:0051248	negative regulation of protein metabolic process	BP	0.0458252	1	30	10	7249	GRMZM2G011523_P01
GO:0032269	negative regulation of cellular protein metabolic process	BP	0.0458252	1	30	10	7249	GRMZM2G011523_P01
GO:0030162	regulation of proteolysis	BP	0.0443773	1	29	10	7250	GRMZM2G011523_P01
GO:0030414	peptidase inhibitor activity	MF	0.0209374	1	13	10	7266	GRMZM2G011523_P01
GO:0004866	endopeptidase inhibitor activity	MF	0.0209374	1	13	10	7266	GRMZM2G011523_P01
GO:0061134	peptidase regulator activity	MF	0.0209374	1	13	10	7266	GRMZM2G011523_P01
GO:0061135	endopeptidase regulator activity	MF	0.0209374	1	13	10	7266	GRMZM2G011523_P01
GO:0004867	serine-type endopeptidase inhibitor activity	MF	0.0135059	1	8	10	7271	GRMZM2G011523_P01
GO:0032993	protein-DNA complex	CC	0.0327219	1	21	10	7258
GO:0044815	DNA packaging complex	CC	0.0283179	1	18	10	7261
GO:0000786	nucleosome	CC	0.0283179	1	18	10	7261

## Sheet: third leaf KR701-specific res
GO enrichment analysis of chilling tolerant line KR701-specific responsive proteins at third leaf stage.
GO.ID	GO.Name	GO.Category	P.Value	Nr.Test	Nr.Reference	Non.Annot.Test	Non.Annot.Reference	SeqTest
GO:0070726	cell wall assembly	BP	0.0329229	1	1	120	7168	GRMZM2G353276_P01
GO:0071668	plant-type cell wall assembly	BP	0.0329229	1	1	120	7168	GRMZM2G353276_P01
GO:0010215	cellulose microfibril organization	BP	0.0329229	1	1	120	7168	GRMZM2G353276_P01
GO:0008199	ferric iron binding	MF	0.0165981	1	0	120	7169	GRMZM2G325575_P01
GO:0004322	ferroxidase activity	MF	0.0165981	1	0	120	7169	GRMZM2G325575_P01
GO:0016724	oxidoreductase activity, oxidizing metal ions, oxygen as acceptor	MF	0.0165981	1	0	120	7169	GRMZM2G325575_P01
GO:0051172	negative regulation of nitrogen compound metabolic process	BP	0.0487282	4	79	117	7090	GRMZM2G173809_P01, GRMZM2G156632_P01, GRMZM2G114552_P04, GRMZM2G447785_P02
GO:0032269	negative regulation of cellular protein metabolic process	BP	0.00160671	4	27	117	7142	GRMZM2G173809_P01, GRMZM2G156632_P01, GRMZM2G114552_P04, GRMZM2G447785_P02
GO:0051248	negative regulation of protein metabolic process	BP	0.00160671	4	27	117	7142	GRMZM2G173809_P01, GRMZM2G156632_P01, GRMZM2G114552_P04, GRMZM2G447785_P02
GO:0030597	RNA glycosylase activity	MF	0.0489789	1	2	120	7167	GRMZM2G173809_P01
GO:0030598	rRNA N-glycosylase activity	MF	0.0489789	1	2	120	7167	GRMZM2G173809_P01
GO:0051879	Hsp90 protein binding	MF	0.0489789	1	2	120	7167	GRMZM2G162688_P01
GO:0070678	preprotein binding	MF	0.0329229	1	1	120	7168	GRMZM2G162688_P01
GO:0072330	monocarboxylic acid biosynthetic process	BP	0.0101107	9	209	112	6960	GRMZM2G160541_P02, GRMZM2G036708_P01, GRMZM2G009030_P01, GRMZM2G109130_P01, GRMZM2G028516_P02, GRMZM2G003762_P03, GRMZM2G156861_P01, GRMZM2G000236_P01, GRMZM2G053669_P01
GO:0002215	defense response to nematode	BP	0.000810847	2	1	119	7168	GRMZM2G156861_P01, GRMZM2G109130_P01
GO:0016702	oxidoreductase activity, acting on single donors with incorporation of molecular oxygen, incorporation of two atoms of oxygen	MF	0.0388686	2	17	119	7152	GRMZM2G156861_P01, GRMZM2G109130_P01
GO:0031408	oxylipin biosynthetic process	BP	0.00476905	3	18	118	7151	GRMZM2G156861_P01, GRMZM2G000236_P01, GRMZM2G109130_P01
GO:0031407	oxylipin metabolic process	BP	0.00476905	3	18	118	7151	GRMZM2G156861_P01, GRMZM2G000236_P01, GRMZM2G109130_P01
GO:0047372	acylglycerol lipase activity	MF	0.0165981	1	0	120	7169	GRMZM2G154523_P01
GO:0042546	cell wall biogenesis	BP	0.0264153	3	36	118	7133	GRMZM2G140893_P01, GRMZM2G353276_P01, GRMZM2G004699_P01
GO:0009832	plant-type cell wall biogenesis	BP	0.0427276	2	18	119	7151	GRMZM2G140893_P01, GRMZM2G353276_P01
GO:0044036	cell wall macromolecule metabolic process	BP	0.00800375	4	44	117	7125	GRMZM2G140893_P01, GRMZM2G051943_P01, GRMZM2G103668_P01, GRMZM2G004699_P01
GO:0052325	cell wall pectin biosynthetic process	BP	0.0329229	1	1	120	7168	GRMZM2G140893_P01
GO:0052546	cell wall pectin metabolic process	BP	0.0329229	1	1	120	7168	GRMZM2G140893_P01
GO:0010289	homogalacturonan biosynthetic process	BP	0.0329229	1	1	120	7168	GRMZM2G140893_P01
GO:0010394	homogalacturonan metabolic process	BP	0.0329229	1	1	120	7168	GRMZM2G140893_P01
GO:0030162	regulation of proteolysis	BP	0.0130655	3	27	118	7142	GRMZM2G114552_P04, GRMZM2G156632_P01, GRMZM2G447785_P02
GO:0051346	negative regulation of hydrolase activity	BP	0.00213309	3	13	118	7156	GRMZM2G114552_P04, GRMZM2G156632_P01, GRMZM2G447785_P02
GO:0010951	negative regulation of endopeptidase activity	BP	0.00142052	3	11	118	7158	GRMZM2G114552_P04, GRMZM2G156632_P01, GRMZM2G447785_P02
GO:0010466	negative regulation of peptidase activity	BP	0.00142052	3	11	118	7158	GRMZM2G114552_P04, GRMZM2G156632_P01, GRMZM2G447785_P02
GO:0045861	negative regulation of proteolysis	BP	0.00142052	3	11	118	7158	GRMZM2G114552_P04, GRMZM2G156632_P01, GRMZM2G447785_P02
GO:0052548	regulation of endopeptidase activity	BP	0.00142052	3	11	118	7158	GRMZM2G114552_P04, GRMZM2G156632_P01, GRMZM2G447785_P02
GO:0052547	regulation of peptidase activity	BP	0.00142052	3	11	118	7158	GRMZM2G114552_P04, GRMZM2G156632_P01, GRMZM2G447785_P02
GO:0004866	endopeptidase inhibitor activity	MF	0.00142052	3	11	118	7158	GRMZM2G114552_P04, GRMZM2G156632_P01, GRMZM2G447785_P02
GO:0061135	endopeptidase regulator activity	MF	0.00142052	3	11	118	7158	GRMZM2G114552_P04, GRMZM2G156632_P01, GRMZM2G447785_P02
GO:0030414	peptidase inhibitor activity	MF	0.00142052	3	11	118	7158	GRMZM2G114552_P04, GRMZM2G156632_P01, GRMZM2G447785_P02
GO:0061134	peptidase regulator activity	MF	0.00142052	3	11	118	7158	GRMZM2G114552_P04, GRMZM2G156632_P01, GRMZM2G447785_P02
GO:0004867	serine-type endopeptidase inhibitor activity	MF	0.000348342	3	6	118	7163	GRMZM2G114552_P04, GRMZM2G156632_P01, GRMZM2G447785_P02
GO:0032050	clathrin heavy chain binding	MF	0.0489789	1	2	120	7167	GRMZM2G112805_P01
GO:0010921	regulation of phosphatase activity	BP	0.0091144	2	7	119	7162	GRMZM2G112524_P02, GRMZM2G112488_P01
GO:0043666	regulation of phosphoprotein phosphatase activity	BP	0.00716639	2	6	119	7163	GRMZM2G112524_P02, GRMZM2G112488_P01
GO:0080163	regulation of protein serine/threonine phosphatase activity	BP	0.00716639	2	6	119	7163	GRMZM2G112524_P02, GRMZM2G112488_P01
GO:0060089	molecular transducer activity	MF	0.0427276	2	18	119	7151	GRMZM2G112524_P02, GRMZM2G112488_P01
GO:0038023	signaling receptor activity	MF	0.0388686	2	17	119	7152	GRMZM2G112524_P02, GRMZM2G112488_P01
GO:0033293	monocarboxylic acid binding	MF	0.0189111	2	11	119	7158	GRMZM2G112524_P02, GRMZM2G112488_P01
GO:0042562	hormone binding	MF	0.0161755	2	10	119	7159	GRMZM2G112524_P02, GRMZM2G112488_P01
GO:0043178	alcohol binding	MF	0.0112701	2	8	119	7161	GRMZM2G112524_P02, GRMZM2G112488_P01
GO:0010427	abscisic acid binding	MF	0.0091144	2	7	119	7162	GRMZM2G112524_P02, GRMZM2G112488_P01
GO:0019840	isoprenoid binding	MF	0.0091144	2	7	119	7162	GRMZM2G112524_P02, GRMZM2G112488_P01
GO:0019212	phosphatase inhibitor activity	MF	0.0091144	2	7	119	7162	GRMZM2G112524_P02, GRMZM2G112488_P01
GO:0019208	phosphatase regulator activity	MF	0.0091144	2	7	119	7162	GRMZM2G112524_P02, GRMZM2G112488_P01
GO:0004864	protein phosphatase inhibitor activity	MF	0.00716639	2	6	119	7163	GRMZM2G112524_P02, GRMZM2G112488_P01
GO:0019888	protein phosphatase regulator activity	MF	0.00716639	2	6	119	7163	GRMZM2G112524_P02, GRMZM2G112488_P01
GO:0051246	regulation of protein metabolic process	BP	0.0143697	7	148	114	7021	GRMZM2G112488_P01, GRMZM2G173809_P01, GRMZM2G156632_P01, GRMZM2G112524_P02, GRMZM2G114552_P04, GRMZM2G060567_P01, GRMZM2G447785_P02
GO:0032268	regulation of cellular protein metabolic process	BP	0.0109626	7	140	114	7029	GRMZM2G112488_P01, GRMZM2G173809_P01, GRMZM2G156632_P01, GRMZM2G112524_P02, GRMZM2G114552_P04, GRMZM2G060567_P01, GRMZM2G447785_P02
GO:0051336	regulation of hydrolase activity	BP	0.00594179	5	65	116	7104	GRMZM2G112488_P01, GRMZM2G156632_P01, GRMZM2G112524_P02, GRMZM2G114552_P04, GRMZM2G447785_P02
GO:0044092	negative regulation of molecular function	BP	0.000603595	5	37	116	7132	GRMZM2G112488_P01, GRMZM2G156632_P01, GRMZM2G112524_P02, GRMZM2G114552_P04, GRMZM2G447785_P02
GO:0043086	negative regulation of catalytic activity	BP	0.000375502	5	33	116	7136	GRMZM2G112488_P01, GRMZM2G156632_P01, GRMZM2G112524_P02, GRMZM2G114552_P04, GRMZM2G447785_P02
GO:0030234	enzyme regulator activity	MF	0.0369435	5	106	116	7063	GRMZM2G112488_P01, GRMZM2G156632_P01, GRMZM2G112524_P02, GRMZM2G114552_P04, GRMZM2G447785_P02
GO:0004857	enzyme inhibitor activity	MF	0.000219485	5	29	116	7140	GRMZM2G112488_P01, GRMZM2G156632_P01, GRMZM2G112524_P02, GRMZM2G114552_P04, GRMZM2G447785_P02
GO:0008289	lipid binding	MF	0.00709019	5	68	116	7101	GRMZM2G112488_P01, GRMZM2G107839_P01, GRMZM2G112524_P02, GRMZM2G137329_P01, GRMZM2G101958_P01
GO:0009611	response to wounding	BP	0.0351518	2	16	119	7153	GRMZM2G107839_P01, GRMZM2G156861_P01
GO:1901136	carbohydrate derivative catabolic process	BP	0.00877834	3	23	118	7146	GRMZM2G103668_P01, GRMZM2G051943_P01, GRMZM2G453805_P01
GO:0006040	amino sugar metabolic process	BP	0.00545587	3	19	118	7150	GRMZM2G103668_P01, GRMZM2G051943_P01, GRMZM2G453805_P01
GO:0006022	aminoglycan metabolic process	BP	0.00413738	3	17	118	7152	GRMZM2G103668_P01, GRMZM2G051943_P01, GRMZM2G453805_P01
GO:0046348	amino sugar catabolic process	BP	0.00213309	3	13	118	7156	GRMZM2G103668_P01, GRMZM2G051943_P01, GRMZM2G453805_P01
GO:0006026	aminoglycan catabolic process	BP	0.00213309	3	13	118	7156	GRMZM2G103668_P01, GRMZM2G051943_P01, GRMZM2G453805_P01
GO:0006032	chitin catabolic process	BP	0.00213309	3	13	118	7156	GRMZM2G103668_P01, GRMZM2G051943_P01, GRMZM2G453805_P01
GO:0006030	chitin metabolic process	BP	0.00213309	3	13	118	7156	GRMZM2G103668_P01, GRMZM2G051943_P01, GRMZM2G453805_P01
GO:1901072	glucosamine-containing compound catabolic process	BP	0.00213309	3	13	118	7156	GRMZM2G103668_P01, GRMZM2G051943_P01, GRMZM2G453805_P01
GO:1901071	glucosamine-containing compound metabolic process	BP	0.00213309	3	13	118	7156	GRMZM2G103668_P01, GRMZM2G051943_P01, GRMZM2G453805_P01
GO:0004568	chitinase activity	MF	0.00213309	3	13	118	7156	GRMZM2G103668_P01, GRMZM2G051943_P01, GRMZM2G453805_P01
GO:0016998	cell wall macromolecule catabolic process	BP	0.0091144	2	7	119	7162	GRMZM2G103668_P01, GRMZM2G051943_P01
GO:0047746	chlorophyllase activity	MF	0.0165981	1	0	120	7169	GRMZM2G103197_P01
GO:0051213	dioxygenase activity	MF	0.00800375	4	44	117	7125	GRMZM2G099467_P01, AC148152.3_FGP005, GRMZM2G156861_P01, GRMZM2G109130_P01
GO:0070574	cadmium ion transmembrane transport	BP	0.0329229	1	1	120	7168	GRMZM2G099191_P01
GO:0015691	cadmium ion transport	BP	0.0329229	1	1	120	7168	GRMZM2G099191_P01
GO:0015086	cadmium ion transmembrane transporter activity	MF	0.0329229	1	1	120	7168	GRMZM2G099191_P01
GO:0006522	alanine metabolic process	BP	0.0329229	1	1	120	7168	GRMZM2G088064_P03
GO:0009078	pyruvate family amino acid metabolic process	BP	0.0329229	1	1	120	7168	GRMZM2G088064_P03
GO:0006524	alanine catabolic process	BP	0.0165981	1	0	120	7169	GRMZM2G088064_P03
GO:0042853	L-alanine catabolic process	BP	0.0165981	1	0	120	7169	GRMZM2G088064_P03
GO:0042851	L-alanine metabolic process	BP	0.0165981	1	0	120	7169	GRMZM2G088064_P03
GO:0009080	pyruvate family amino acid catabolic process	BP	0.0165981	1	0	120	7169	GRMZM2G088064_P03
GO:0016847	1-aminocyclopropane-1-carboxylate synthase activity	MF	0.0165981	1	0	120	7169	GRMZM2G088064_P03
GO:0047635	alanine-oxo-acid transaminase activity	MF	0.0165981	1	0	120	7169	GRMZM2G088064_P03
GO:0004021	L-alanine:2-oxoglutarate aminotransferase activity	MF	0.0165981	1	0	120	7169	GRMZM2G088064_P03
GO:0004096	catalase activity	MF	0.0489789	1	2	120	7167	GRMZM2G079348_P02
GO:0009646	response to absence of light	BP	0.0489789	1	2	120	7167	GRMZM2G053669_P01
GO:0070981	L-asparagine biosynthetic process	BP	0.0329229	1	1	120	7168	GRMZM2G053669_P01
GO:0070982	L-asparagine metabolic process	BP	0.0329229	1	1	120	7168	GRMZM2G053669_P01
GO:0042737	drug catabolic process	BP	0.0114917	6	108	115	7061	GRMZM2G051943_P01, GRMZM2G453805_P01, GRMZM2G160541_P02, GRMZM2G036708_P01, GRMZM2G103668_P01, GRMZM2G079348_P02
GO:0006952	defense response	BP	0.00304907	9	172	112	6997	GRMZM2G051943_P01, GRMZM2G112488_P01, GRMZM2G109130_P01, GRMZM2G173809_P01, GRMZM2G028516_P02, GRMZM2G112524_P02, GRMZM2G026151_P01, GRMZM2G156861_P01, GRMZM2G000236_P01
GO:0009407	toxin catabolic process	BP	0.0351518	2	16	119	7153	GRMZM2G044383_P01, GRMZM2G447632_P01
GO:0016973	poly(A)+ mRNA export from nucleus	BP	0.0489789	1	2	120	7167	GRMZM2G042032_P02
GO:0004034	aldose 1-epimerase activity	MF	0.0489789	1	2	120	7167	GRMZM2G041356_P01
GO:0016846	carbon-sulfur lyase activity	MF	0.0161755	2	10	119	7159	GRMZM2G036708_P01, GRMZM2G088064_P03
GO:0019500	cyanide catabolic process	BP	0.0165981	1	0	120	7169	GRMZM2G036708_P01
GO:0019499	cyanide metabolic process	BP	0.0165981	1	0	120	7169	GRMZM2G036708_P01
GO:0051410	detoxification of nitrogen compound	BP	0.0165981	1	0	120	7169	GRMZM2G036708_P01
GO:0050017	L-3-cyanoalanine synthase activity	MF	0.0165981	1	0	120	7169	GRMZM2G036708_P01
GO:0009607	response to biotic stimulus	BP	0.0286428	6	134	115	7035	GRMZM2G028516_P02, GRMZM2G112488_P01, GRMZM2G112524_P02, GRMZM2G156861_P01, GRMZM2G103668_P01, GRMZM2G109130_P01
GO:0043562	cellular response to nitrogen levels	BP	0.0489789	1	2	120	7167	GRMZM2G028516_P02
GO:0006995	cellular response to nitrogen starvation	BP	0.0489789	1	2	120	7167	GRMZM2G028516_P02
GO:0010204	defense response signaling pathway, resistance gene-independent	BP	0.0489789	1	2	120	7167	GRMZM2G028516_P02
GO:0008061	chitin binding	MF	0.00142052	3	11	118	7158	GRMZM2G026151_P01, GRMZM2G051943_P01, GRMZM2G453805_P01
GO:0042803	protein homodimerization activity	MF	0.0300882	3	38	118	7131	GRMZM2G026151_P01, GRMZM2G003762_P03, GRMZM2G053669_P01
GO:0019748	secondary metabolic process	BP	0.0447093	5	112	116	7057	GRMZM2G025832_P01, GRMZM2G160541_P02, GRMZM2G036708_P01, GRMZM2G044383_P01, GRMZM2G447632_P01
GO:0071554	cell wall organization or biogenesis	BP	0.0322726	6	138	115	7031	GRMZM2G009025_P01, GRMZM2G140893_P01, GRMZM2G051943_P01, GRMZM2G353276_P01, GRMZM2G103668_P01, GRMZM2G004699_P01
GO:0000272	polysaccharide catabolic process	BP	0.0497369	3	47	118	7122	GRMZM2G009025_P01, GRMZM2G103668_P01, GRMZM2G051943_P01
GO:0016798	hydrolase activity, acting on glycosyl bonds	MF	0.0365112	7	181	114	6988	GRMZM2G009025_P01, GRMZM2G018716_P01, GRMZM2G051943_P01, GRMZM2G453805_P01, GRMZM2G173809_P01, GRMZM2G103668_P01, GRMZM2G004699_P01
GO:0006529	asparagine biosynthetic process	BP	0.00543356	2	5	119	7164	GRMZM2G003762_P03, GRMZM2G053669_P01
GO:0006528	asparagine metabolic process	BP	0.00543356	2	5	119	7164	GRMZM2G003762_P03, GRMZM2G053669_P01
GO:0004066	asparagine synthase (glutamine-hydrolyzing) activity	MF	0.00543356	2	5	119	7164	GRMZM2G003762_P03, GRMZM2G053669_P01
GO:0016629	12-oxophytodienoate reductase activity	MF	0.0489789	1	2	120	7167	GRMZM2G000236_P01
GO:0005576	extracellular region	CC	7.89142e-05	12	181	109	6988

## Sheet: third leaf hei8834-specific res
GO enrichment analysis of chilling sensitive line hei8834-specific responsive proteins at third leaf stage.
GO.ID	GO.Name	GO.Category	P.Value	Nr.Test	Nr.Reference	Non.Annot.Test	Non.Annot.Reference	SeqTest
GO:0019684	photosynthesis, light reaction	BP	0.0198406	3	118	32	7137	GRMZM5G809292_P02, GRMZM2G436986_P01, GRMZM2G153184_P01
GO:0015979	photosynthesis	BP	0.0171461	4	205	31	7050	GRMZM5G809292_P02, GRMZM2G021617_P01, GRMZM2G436986_P01, GRMZM2G153184_P01
GO:0048564	photosystem I assembly	BP	0.0284727	1	5	34	7250	GRMZM5G809292_P02
GO:0051260	protein homooligomerization	BP	0.0284727	1	5	34	7250	GRMZM2G450498_P01
GO:0051262	protein tetramerization	BP	0.0237825	1	4	34	7251	GRMZM2G450498_P01
GO:0051289	protein homotetramerization	BP	0.0095798	1	1	34	7254	GRMZM2G450498_P01
GO:0018826	methionine gamma-lyase activity	MF	0.0048011	1	0	34	7255	GRMZM2G450498_P01
GO:0045156	electron transporter, transferring electrons within the cyclic electron transport pathway of photosynthesis activity	MF	0.0284727	1	5	34	7250	GRMZM2G436986_P01
GO:0051275	beta-glucan catabolic process	BP	0.0331409	1	6	34	7249	GRMZM2G331566_P02
GO:0030245	cellulose catabolic process	BP	0.0237825	1	4	34	7251	GRMZM2G331566_P02
GO:0008810	cellulase activity	MF	0.0190704	1	3	34	7252	GRMZM2G331566_P02
GO:0036192	3-hydroxyindolin-2-one monooxygenase activity	MF	0.0048011	1	0	34	7255	GRMZM2G172491_P01
GO:0008378	galactosyltransferase activity	MF	0.0331409	1	6	34	7249	GRMZM2G165919_P01
GO:0035250	UDP-galactosyltransferase activity	MF	0.0095798	1	1	34	7254	GRMZM2G165919_P01
GO:0047216	inositol 3-alpha-galactosyltransferase activity	MF	0.0048011	1	0	34	7255	GRMZM2G165919_P01
GO:0016653	oxidoreductase activity, acting on NAD(P)H, heme protein as acceptor	MF	0.0377874	1	7	34	7248	GRMZM2G158039_P02
GO:0004128	cytochrome-b5 reductase activity, acting on NAD(P)H	MF	0.0190704	1	3	34	7252	GRMZM2G158039_P02
GO:0090391	granum assembly	BP	0.0095798	1	1	34	7254	GRMZM2G150791_P01
GO:0031386	protein tag	MF	0.0095798	1	1	34	7254	GRMZM2G132000_P03
GO:0006749	glutathione metabolic process	BP	0.0274163	2	52	33	7203	GRMZM2G126763_P01, GRMZM2G096247_P01
GO:0004364	glutathione transferase activity	MF	0.0211475	2	45	33	7210	GRMZM2G126763_P01, GRMZM2G096247_P01
GO:0042973	glucan endo-1,3-beta-D-glucosidase activity	MF	0.0377874	1	7	34	7248	GRMZM2G125032_P01
GO:0004338	glucan exo-1,3-beta-glucosidase activity	MF	0.0143362	1	2	34	7253	GRMZM2G125032_P01
GO:0071267	L-methionine salvage	BP	0.0470153	1	9	34	7246	GRMZM2G111200_P01
GO:0043102	amino acid salvage	BP	0.0470153	1	9	34	7246	GRMZM2G111200_P01
GO:0019509	L-methionine salvage from methylthioadenosine	BP	0.0424121	1	8	34	7247	GRMZM2G111200_P01
GO:0043874	acireductone synthase activity	MF	0.0143362	1	2	34	7253	GRMZM2G111200_P01
GO:0000463	maturation of LSU-rRNA from tricistronic rRNA transcript (SSU-rRNA, 5.8S rRNA, LSU-rRNA)	BP	0.0377874	1	7	34	7248	GRMZM2G100225_P01
GO:0033218	amide binding	MF	0.0293294	2	54	33	7201	GRMZM2G079908_P01, GRMZM2G344634_P01
GO:1901681	sulfur compound binding	MF	0.00895398	2	28	33	7227	GRMZM2G079908_P01, GRMZM2G344634_P01
GO:1901567	fatty acid derivative binding	MF	0.00363812	2	17	33	7238	GRMZM2G079908_P01, GRMZM2G344634_P01
GO:0000062	fatty-acyl-CoA binding	MF	0.00363812	2	17	33	7238	GRMZM2G079908_P01, GRMZM2G344634_P01
GO:0065009	regulation of molecular function	BP	0.0452527	3	164	32	7091	GRMZM2G075283_P01, GRMZM2G436986_P01, GRMZM2G032315_P01
GO:0050790	regulation of catalytic activity	BP	0.0394131	3	155	32	7100	GRMZM2G075283_P01, GRMZM2G436986_P01, GRMZM2G032315_P01
GO:0031399	regulation of protein modification process	BP	0.033311	2	58	33	7197	GRMZM2G075283_P01, GRMZM2G032315_P01
GO:0051174	regulation of phosphorus metabolic process	BP	0.0312947	2	56	33	7199	GRMZM2G075283_P01, GRMZM2G032315_P01
GO:0019220	regulation of phosphate metabolic process	BP	0.0312947	2	56	33	7199	GRMZM2G075283_P01, GRMZM2G032315_P01
GO:0008289	lipid binding	MF	0.0475868	2	71	33	7184	GRMZM2G075283_P01, AC234171.1_FGP003
GO:0010921	regulation of phosphatase activity	BP	0.0424121	1	8	34	7247	GRMZM2G075283_P01
GO:0043666	regulation of phosphoprotein phosphatase activity	BP	0.0377874	1	7	34	7248	GRMZM2G075283_P01
GO:0080163	regulation of protein serine/threonine phosphatase activity	BP	0.0377874	1	7	34	7248	GRMZM2G075283_P01
GO:0043178	alcohol binding	MF	0.0470153	1	9	34	7246	GRMZM2G075283_P01
GO:0019840	isoprenoid binding	MF	0.0424121	1	8	34	7247	GRMZM2G075283_P01
GO:0010427	abscisic acid binding	MF	0.0424121	1	8	34	7247	GRMZM2G075283_P01
GO:0019208	phosphatase regulator activity	MF	0.0424121	1	8	34	7247	GRMZM2G075283_P01
GO:0019212	phosphatase inhibitor activity	MF	0.0424121	1	8	34	7247	GRMZM2G075283_P01
GO:0019888	protein phosphatase regulator activity	MF	0.0377874	1	7	34	7248	GRMZM2G075283_P01
GO:0004864	protein phosphatase inhibitor activity	MF	0.0377874	1	7	34	7248	GRMZM2G075283_P01
GO:0002181	cytoplasmic translation	BP	0.0322965	2	57	33	7198	GRMZM2G032315_P01, GRMZM2G100225_P01
GO:0001934	positive regulation of protein phosphorylation	BP	0.0377874	1	7	34	7248	GRMZM2G032315_P01
GO:0045860	positive regulation of protein kinase activity	BP	0.0377874	1	7	34	7248	GRMZM2G032315_P01
GO:0032147	activation of protein kinase activity	BP	0.0284727	1	5	34	7250	GRMZM2G032315_P01
GO:0070180	large ribosomal subunit rRNA binding	MF	0.0424121	1	8	34	7247	GRMZM2G032315_P01
GO:0030295	protein kinase activator activity	MF	0.0143362	1	2	34	7253	GRMZM2G032315_P01
GO:0019209	kinase activator activity	MF	0.0143362	1	2	34	7253	GRMZM2G032315_P01
GO:0006458	'de novo' protein folding	BP	0.0331409	1	6	34	7249	GRMZM2G013652_P01
GO:0051084	'de novo' posttranslational protein folding	BP	0.0331409	1	6	34	7249	GRMZM2G013652_P01
GO:0051085	chaperone cofactor-dependent protein refolding	BP	0.0331409	1	6	34	7249	GRMZM2G013652_P01
GO:0048268	clathrin coat assembly	BP	0.0190704	1	3	34	7252	AC234171.1_FGP003
GO:0030276	clathrin binding	MF	0.0470153	1	9	34	7246	AC234171.1_FGP003
GO:0005545	1-phosphatidylinositol binding	MF	0.0190704	1	3	34	7252	AC234171.1_FGP003
GO:0009507	chloroplast	CC	0.0402073	10	1144	25	6111
GO:0009579	thylakoid	CC	8.40862e-05	8	302	27	6953
GO:0044435	plastid part	CC	0.0395428	7	672	28	6583
GO:0044434	chloroplast part	CC	0.0361156	7	659	28	6596
GO:0031984	organelle subcompartment	CC	0.019401	6	447	29	6808
GO:0031976	plastid thylakoid	CC	0.00101123	6	241	29	7014
GO:0009534	chloroplast thylakoid	CC	0.000990075	6	240	29	7015
GO:0044436	thylakoid part	CC	0.000680064	6	223	29	7032
GO:0034357	photosynthetic membrane	CC	0.00303523	5	205	30	7050
GO:0042651	thylakoid membrane	CC	0.00291206	5	203	30	7052
GO:0055035	plastid thylakoid membrane	CC	0.00214931	5	189	30	7066
GO:0009535	chloroplast thylakoid membrane	CC	0.00210114	5	188	30	7067
GO:0022626	cytosolic ribosome	CC	0.038172	3	153	32	7102
GO:0015934	large ribosomal subunit	CC	0.014312	3	104	32	7151
GO:0022625	cytosolic large ribosomal subunit	CC	0.00815798	3	84	32	7171
GO:0009521	photosystem	CC	0.00301588	3	58	32	7197
GO:1990204	oxidoreductase complex	CC	0.048764	2	72	33	7183
GO:0019898	extrinsic component of membrane	CC	0.0155816	2	38	33	7217
GO:0009523	photosystem II	CC	0.0141277	2	36	33	7219
GO:0009654	photosystem II oxygen evolving complex	CC	0.0048705	2	20	33	7235
GO:0009344	nitrite reductase complex [NAD(P)H]	CC	0.0143362	1	2	34	7253
