# Supplementary material for: Comparative Proteomics Combined with Morphophysiological Analysis Revealed Chilling Response Patterns in Two Contrasting Maize Genotypes
Source: Cells. 2022 Apr 13;11(8):1321. doi: 10.3390/cells11081321 (PMC9024610; doi:10.3390/cells11081321)
Supplement: Supplementary file 1 [file cells-11-01321-s001.zip › Table S8.xlsx]

## Sheet: abundance
Supplemental Table S8
The fold change(Abundance) of chilling tolerant line KR701 and chilling sensitive line hei8834 at first leaf and third leaf stage. All experimental processing needs to have data.
Accession Number	first leaf stage		third leaf stage
	KR701-abundance-(+)/(-)	hei8834-abundance-(+)/(-)	KR701-abundance-(+)/(-)	hei8834-abundance-(+)/(-)
GRMZM2G014695_P01	0.458356	0.652447	0.60145	0.66113
GRMZM2G313529_P01	1.03297	1.02859	1.00787	1.04549
GRMZM2G170602_P01	1.22747	1.15228	1.1617	1.02615
GRMZM2G140893_P01	1.08922	1.10183	1.43818	0.983205
GRMZM2G162840_P01	1.11248	0.942279	1.34684	0.891476
GRMZM2G701207_P03	0.979417	0.874706	0.916411	0.865077
GRMZM2G107388_P01	0.853065	0.817964	0.99611	0.971107
GRMZM2G361398_P01	1.00727	1.1474	1.02268	0.944418
GRMZM2G098460_P01	0.788861	0.807483	0.759628	0.753966
GRMZM5G823135_P01	1.03753	1.12261	1.06956	1.07305
GRMZM2G137495_P01	0.970068	0.885711	1.05602	1.0542
GRMZM2G090020_P01	0.983835	1.07081	1.01093	0.997444
GRMZM2G070899_P02	1.04413	1.29092	1.11349	0.962694
GRMZM2G101117_P01	0.662052	0.849467	0.914931	1.02835
GRMZM2G110726_P01	1.28219	1.11761	1.06981	0.917385
GRMZM2G461666_P01	1.0067	1.0377	1.123	0.9263
GRMZM2G107872_P02	1.30511	0.906047	1.20011	0.912328
GRMZM5G822237_P02	1.0576	0.936531	0.991484	0.920398
GRMZM2G023020_P01	1.13346	1.06259	0.939348	1.05474
GRMZM2G301908_P01	1.20983	1.48665	1.13485	1.03858
GRMZM2G097395_P01	0.938759	0.962377	1.06908	0.980397
GRMZM2G131177_P01	1.19294	0.97774	1.11012	1.05938
GRMZM2G136680_P01	1.29906	1.25811	1.17505	0.991915
GRMZM2G363545_P04	1.01208	1.06281	1.04579	1.0412
GRMZM2G428628_P01	1.07592	1.02217	1.15413	1.07429
GRMZM2G014902_P01	0.627143	0.526277	0.838232	0.863515
GRMZM2G006006_P01	1.27012	1.25749	1.18462	0.990914
GRMZM2G005205_P02	1.13127	0.86189	1.01629	1.07043
GRMZM2G152111_P06	0.996152	1.03395	1.053	1.07686
GRMZM2G302074_P01	1.04049	0.967127	0.944869	0.962593
GRMZM2G384730_P01	0.970332	1.00051	1.10645	1.0778
GRMZM2G039520_P01	0.926151	1.1006	1.04677	0.981821
GRMZM2G164676_P02	0.829395	0.916054	0.944944	1.05174
GRMZM2G346263_P03	0.868999	0.889771	0.868681	0.971276
GRMZM2G128641_P01	1.09107	1.12885	1.07027	1.07293
GRMZM2G478621_P01	1.21088	1.05551	0.930462	0.968323
GRMZM2G041561_P01	1.05129	1.01397	0.946874	1.07849
GRMZM5G889052_P01	1.14353	1.09585	1.05276	0.956838
GRMZM2G164074_P01	1.01553	1.17744	0.936587	0.929972
AC233850.1_FGP003	1.02343	1.06874	1.02256	0.836792
GRMZM2G065694_P01	0.937125	0.944945	0.99596	0.957084
GRMZM2G145504_P01	1.16145	1.25153	1.17119	0.890985
GRMZM2G167549_P03	1.42069	1.04681	0.93975	0.846731
GRMZM2G163641_P01	1.42457	1.23862	1.06101	0.968678
GRMZM2G026147_P03	1.29223	1.02925	1.02908	1.00503
GRMZM2G059799_P01	1.26488	1.11161	0.996185	0.897158
GRMZM2G019738_P02	0.972431	1.04529	0.944374	1.04345
GRMZM2G073114_P01	1.06133	1.60704	1.34838	1.11812
GRMZM2G042881_P01	1.21229	1.08733	1.02304	0.894776
GRMZM2G145935_P02	1.01111	1.01485	0.982732	1.02027
GRMZM2G099891_P02	0.987207	0.888578	0.919654	0.988608
GRMZM2G102483_P02	1.21821	1.03537	1.07814	0.884262
GRMZM2G025867_P01	0.950307	1.0119	0.939418	1.06707
GRMZM2G148586_P01	1.15902	0.96981	1.05444	0.967519
GRMZM2G374629_P01	0.991856	0.862357	0.914903	0.868339
GRMZM2G144180_P01	1.11791	0.987884	0.953793	0.934063
GRMZM2G013082_P01	1.73113	1.61605	0.999398	1.15412
GRMZM2G013908_P01	0.954709	1.02855	1.03577	0.984096
GRMZM2G416684_P01	1.02435	1.30817	0.994096	1.0471
GRMZM2G043331_P02	1.1989	1.10328	1.05681	0.848926
GRMZM2G009928_P01	1.09739	1.03689	1.04396	1.02434
GRMZM2G376416_P02	0.995679	0.92933	0.992019	0.968243
GRMZM2G034276_P01	0.995228	0.980946	0.96971	1.0457
GRMZM2G116427_P01	1.36697	1.33785	1.23526	0.959879
GRMZM2G422205_P01	0.938624	0.852925	1.11742	1.05158
GRMZM2G009025_P01	0.775962	0.824883	0.756298	0.918933
GRMZM2G444029_P01	0.883302	0.951461	0.842422	0.963918
GRMZM2G003179_P01	1.09049	1.00836	1.13389	0.960173
GRMZM2G136016_P01	0.896706	1.03797	1.02533	1.0667
GRMZM2G149317_P01	1.27951	1.1393	1.16082	1.06079
GRMZM2G179346_P01	1.00343	1.04893	0.930463	1.07345
GRMZM2G146267_P02	0.933968	0.946848	1.02494	0.949699
GRMZM2G058292_P01	1.11936	1.03212	1.01403	0.970372
GRMZM2G176523_P01	1.02735	0.960835	1.02917	1.04323
GRMZM2G484344_P01	1.19987	1.11955	1.17662	0.975756
GRMZM5G886363_P02	0.921498	1.04718	1.05483	0.936658
GRMZM2G077863_P01	1.03221	1.11983	1.07197	1.02808
GRMZM2G116133_P07	1.0463	1.03288	0.982287	0.995772
GRMZM2G075839_P01	1.18496	1.14234	0.909175	0.793022
GRMZM2G021598_P02	0.982287	0.972096	1.06156	1.09986
GRMZM2G039993_P01	1.1002	0.990446	1.19531	1.04859
GRMZM2G059449_P01	1.30364	1.34176	1.17987	0.915286
GRMZM2G010836_P02	1.20881	1.19873	1.02134	0.942579
GRMZM2G352601_P01	1.09286	1.13097	1.10197	0.965495
GRMZM2G068010_P01	1.0988	1.13898	1.05596	1.03938
GRMZM2G174855_P01	1.09657	1.06964	1.12879	1.01505
GRMZM5G800586_P01	1.0547	1.25767	1.16827	1.01305
GRMZM2G056247_P01	1.21034	1.12605	0.986387	1.0046
GRMZM2G122943_P01	1.10214	1.01973	0.942635	0.961156
GRMZM2G173978_P01	1.13096	1.05421	0.940037	0.996924
GRMZM2G098819_P02	1.20144	1.17926	1.09654	0.877743
GRMZM2G116053_P01	1.17327	1.3344	1.18103	1.08344
GRMZM2G006229_P02	1.26297	1.36403	1.06171	1.13755
AC209705.3_FGP004	1.02039	0.991607	1.07	0.958899
GRMZM2G132504_P04	0.924465	0.952359	0.911697	0.980554
GRMZM2G079499_P01	1.1903	1.05308	0.997201	1.05197
GRMZM2G150014_P01	1.14748	1.05303	0.99788	1.00796
AC203753.4_FGP007	0.938982	1.03974	1.06879	1.09193
GRMZM2G113276_P01	0.994525	1.09609	1.00549	0.964607
GRMZM2G146240_P01	0.929498	1.00382	0.868955	0.91801
GRMZM2G046021_P01	1.03693	1.1234	1.02232	0.978413
GRMZM2G005126_P01	1.05395	1.07178	1.04051	1.14799
GRMZM2G112535_P01	1.19814	1.36764	1.17615	0.910293
GRMZM2G124203_P02	1.12839	1.13508	1.28225	0.939701
GRMZM2G026654_P04	0.902363	0.867262	1.0606	1.08611
GRMZM2G319169_P01	0.913958	0.899044	0.857101	0.909585
GRMZM2G110143_P02	1.07692	1.10803	1.04059	1.04239
GRMZM2G061043_P01	1.05084	0.958947	1.02652	1.06745
GRMZM2G158437_P02	1.11174	1.01811	0.930687	1.00611
GRMZM2G097426_P02	1.02841	1.09002	1.02085	1.04884
GRMZM5G823004_P01	0.994537	1.03062	0.956273	1.06322
GRMZM2G448456_P01	1.08593	1.13455	1.00874	0.991003
AC205703.4_FGP002	0.8668	0.994707	1.1102	0.945202
GRMZM2G111713_P01	1.05768	1.40037	1.09874	0.929127
GRMZM2G123159_P01	1.17258	1.28133	1.03792	1.01715
GRMZM2G399750_P02	1.16066	1.03496	1.32467	1.0787
GRMZM2G178769_P01	1.20336	1.06228	1.15433	1.04927
GRMZM2G415327_P05	1.15096	1.02552	0.936147	1.11248
GRMZM2G165919_P01	0.971349	0.939733	0.899144	0.741317
GRMZM2G071163_P01	0.915495	0.929038	0.981865	0.966037
GRMZM2G093405_P06	1.22596	1.2742	1.11776	0.898712
GRMZM2G170805_P01	1.03188	1.10925	1.03147	0.848785
GRMZM2G053927_P02	0.976927	0.988666	1.01362	0.958085
GRMZM2G006806_P01	1.16031	1.21531	1.01099	1.05442
GRMZM2G059565_P01	1.11529	1.11797	1.05512	1.01053
GRMZM2G044348_P02	1.10232	1.22394	0.978263	1.06251
GRMZM2G142217_P01	1.01343	1.12659	1.01314	0.97353
GRMZM2G126834_P02	1.00557	0.903957	0.862594	0.845628
GRMZM2G149422_P01	1.36347	0.956025	1.08368	1.0145
GRMZM2G318860_P02	1.03969	1.08323	1.07159	1.05653
GRMZM2G050186_P03	1.04078	1.03312	1.00311	1.10223
GRMZM2G024211_P01	1.05804	1.09957	1.02032	1.04743
GRMZM5G834128_P01	0.960509	0.967092	0.982516	1.04735
GRMZM2G098857_P02	1.13988	0.986803	0.923676	0.90682
AC205362.4_FGP002	0.975057	0.955995	0.932403	0.948392
GRMZM2G137352_P01	1.31988	1.1451	1.09878	0.934199
GRMZM6G798998_P02	1.17379	1.15393	1.00271	1.02533
GRMZM2G095211_P01	1.07173	1.09675	1.00988	1.04347
GRMZM2G075562_P01	0.763439	0.898514	0.964573	1.07219
GRMZM2G147811_P01	1.01221	1.00362	0.997626	0.998934
GRMZM5G807734_P01	0.862208	0.984707	0.982752	1.03665
GRMZM2G443495_P05	1.29523	1.43354	1.15862	1.06332
GRMZM2G052434_P01	1.14549	1.13587	1.05012	1.11682
GRMZM2G316030_P01	1.06215	1.02815	0.987411	0.984685
GRMZM5G840699_P01	1.03426	1.09167	1.05522	0.987284
GRMZM2G047456_P04	0.991775	1.07078	1.06964	1.15952
GRMZM2G367638_P01	0.95133	0.922683	0.961002	0.973606
GRMZM2G111511_P02	0.977122	0.983971	1.07736	0.987681
GRMZM2G005562_P03	1.08241	1.11621	1.09101	1.0061
GRMZM2G169825_P01	1.09042	1.18779	0.995635	0.936647
GRMZM2G166994_P01	1.07541	0.996762	0.997637	0.835211
GRMZM2G078024_P01	0.906495	0.995602	1.03047	0.971858
GRMZM2G131482_P02	0.94111	0.941376	0.934919	1.11466
GRMZM2G414813_P02	0.919551	0.972022	0.981444	0.9756
GRMZM2G042398_P01	1.02142	1.10876	0.987282	1.00352
GRMZM2G036720_P01	0.941877	0.923448	0.986664	1.00297
GRMZM2G315401_P01	0.828291	0.851029	0.995613	0.986507
GRMZM2G130959_P02	0.985809	0.98561	0.935546	0.978912
GRMZM2G117963_P01	1.04498	1.05018	0.999866	0.957879
GRMZM2G160842_P02	1.04972	0.978035	0.978665	0.960963
GRMZM2G041818_P01	0.970377	0.939668	0.920494	0.948905
GRMZM2G149060_P01	1.07673	1.20476	1.08462	1.0775
GRMZM2G021706_P01	0.901967	0.941003	0.956952	0.954231
GRMZM2G039889_P05	1.0432	0.937	1.0289	1.00545
GRMZM2G078638_P01	1.07418	1.0284	1.04725	1.03762
GRMZM2G166692_P01	0.777664	0.753094	0.856733	0.884411
GRMZM2G127117_P02	0.920793	0.982935	1.00781	1.13703
GRMZM2G139712_P01	1.03255	1.03904	0.976717	1.01054
GRMZM2G090559_P01	1.06732	1.00291	1.04363	1.02083
GRMZM2G330772_P02	1.27632	1.42851	1.2478	0.875694
GRMZM2G004006_P02	0.997179	0.906053	0.900169	0.901592
GRMZM2G103599_P01	1.18373	1.18579	1.07825	0.986499
GRMZM2G043119_P01	1.11851	1.2108	1.05396	1.01064
GRMZM2G045944_P01	1.00799	0.995798	1.00749	1.01615
GRMZM2G145175_P02	1.34922	1.37197	1.08151	0.833476
GRMZM2G161212_P01	1.12585	0.987373	1.07371	1.05415
GRMZM2G085827_P01	0.838691	0.988596	1.04202	1.01758
GRMZM2G109814_P01	1.05044	0.972106	0.925994	0.933996
GRMZM2G326707_P01	0.886155	0.952418	0.76598	1.03423
GRMZM2G701058_P01	1.15026	1.14536	1.18157	0.994489
GRMZM2G092190_P01	1.04713	1.25534	0.985145	0.993281
GRMZM2G112530_P01	1.23129	1.24519	1.06154	1.02458
GRMZM2G074267_P01	1.26317	1.39018	1.21353	1.17513
GRMZM2G333833_P01	1.09243	1.20223	1.08409	1.11966
GRMZM2G003979_P01	1.0144	0.998323	1.04318	1.09796
GRMZM2G028413_P01	1.05347	1.20221	0.99088	1.02231
GRMZM5G871861_P04	1.00534	1.15985	1.06818	1.0147
GRMZM2G355523_P01	0.965441	0.907116	1.04279	0.996464
GRMZM2G392798_P01	1.13528	1.03501	1.14583	1.04507
GRMZM2G105755_P02	0.848328	0.921107	0.931733	0.932292
GRMZM2G108087_P01	1.28872	1.29475	1.16982	0.937475
GRMZM2G008425_P01	0.891808	0.894616	0.868307	1.02757
GRMZM2G426229_P01	0.975811	0.831873	1.05494	1.11104
GRMZM2G009994_P02	1.05835	1.09623	1.00161	1.06784
GRMZM2G022506_P01	1.12867	0.99788	1.01573	1.01771
GRMZM2G311969_P02	0.959345	1.01128	1.04709	1.01834
GRMZM2G140156_P01	1.02028	1.01694	0.941414	0.981231
GRMZM2G048435_P02	0.965938	0.985809	0.938416	1.06362
GRMZM2G104843_P01	1.1358	1.05528	1.02423	0.995363
GRMZM2G320023_P01	0.969991	0.965365	1.05216	1.04038
GRMZM5G868062_P04	1.4414	1.4736	1.13522	0.882141
GRMZM2G088793_P01	1.04822	1.08898	0.989129	1.14201
GRMZM2G074138_P02	1.04122	1.21775	0.866941	1.00717
GRMZM2G114692_P01	1.09738	1.07327	0.891789	1.10733
GRMZM2G003814_P01	1.04894	0.977077	1.04342	1.00551
GRMZM2G077212_P01	1.08769	1.12199	1.07737	1.03964
GRMZM2G004475_P02	1.10184	1.10749	1.12669	1.07066
GRMZM2G002756_P01	0.863192	0.922903	0.941789	0.904158
GRMZM2G333659_P01	1.05175	1.06018	1.0854	1.05965
GRMZM2G069911_P01	0.639778	0.629596	0.526005	0.682988
GRMZM2G057369_P01	1.07104	1.00121	1.05013	1.03975
GRMZM2G159720_P01	0.913978	1.04572	1.0088	0.984832
GRMZM2G013318_P01	1.03918	1.21386	0.93118	0.991577
GRMZM2G074956_P01	0.937745	0.96377	1.07737	1.03853
GRMZM2G026391_P02	0.966866	0.985233	0.962335	0.924707
GRMZM2G081350_P01	0.946783	0.938893	1.00553	1.01384
GRMZM2G003057_P06	1.00577	1.06361	1.05866	0.950642
GRMZM2G098667_P03	1.08722	1.05508	1.03082	0.981216
GRMZM2G050089_P02	1.07394	1.14352	1.05522	0.951734
GRMZM2G109720_P01	1.01265	1.0281	1.0292	1.02724
GRMZM2G141185_P02	0.957605	1.14784	0.996276	0.971433
GRMZM2G145473_P01	0.949049	0.906423	1.03633	1.17794
GRMZM2G377487_P01	1.1064	1.22747	1.2213	0.925411
GRMZM2G150631_P02	0.945025	1.06474	0.970315	0.986806
GRMZM2G110145_P01	1.21053	1.30151	1.05452	0.973115
GRMZM2G142249_P01	1.01145	1.06659	1.02259	1.17258
GRMZM2G180863_P01	0.921999	1.00926	1.11187	0.97652
GRMZM2G475257_P03	0.920519	1.0111	0.924484	0.899104
GRMZM2G065171_P01	1.12506	1.17503	1.06369	1.02192
GRMZM2G450488_P01	0.970737	1.06878	1.04606	1.0468
GRMZM2G085022_P01	0.95825	1.16842	0.924049	0.929207
GRMZM2G130127_P01	1.0761	1.07073	1.05064	1.03321
GRMZM2G007080_P01	1.10172	1.07958	1.09863	1.0431
GRMZM2G060464_P02	1.25566	1.14278	1.02961	1.0376
GRMZM2G038967_P01	0.943804	0.995229	0.931302	0.949673
GRMZM2G000753_P01	1.01088	1.01614	1.01067	0.994153
GRMZM2G359735_P01	1.10939	1.10629	0.965994	1.12522
GRMZM5G837822_P01	0.878585	1.04049	0.96372	0.959526
AC208327.4_FGP003	1.16162	1.21782	1.08745	1.12738
GRMZM5G860235_P01	1.04092	1.04017	0.964686	0.992609
GRMZM2G102903_P02	1.34761	1.26898	1.09547	0.94976
GRMZM5G858417_P01	0.965843	1.00083	1.01455	1.02695
GRMZM2G087712_P01	0.930648	1.03424	0.923514	0.985243
GRMZM2G176225_P01	1.10551	1.19747	1.05024	0.977171
GRMZM2G019084_P01	0.988743	1.05773	0.873518	1.07853
GRMZM6G923769_P01	1.06276	1.17739	1.10015	1.02123
GRMZM2G036697_P01	0.952997	0.980238	0.906278	0.946254
GRMZM2G330650_P01	1.15921	1.16282	1.02963	0.905498
GRMZM2G075551_P03	0.977766	0.984836	1.06561	1.12911
GRMZM2G118362_P01	1.43869	1.43171	1.31507	1.08778
GRMZM2G072065_P01	1.11355	1.16382	1.13903	1.16351
GRMZM2G060856_P01	0.934397	1.05297	0.905872	1.00615
GRMZM2G110572_P02	0.913289	0.934671	0.906311	1.01145
GRMZM2G005444_P01	0.936313	1.06431	0.950652	1.0584
GRMZM2G132519_P01	1.10849	1.19867	0.903589	1.12552
GRMZM2G137707_P01	1.1493	1.24903	1.02686	1.04135
GRMZM2G180458_P01	0.936695	0.891973	0.917835	0.962345
GRMZM2G456473_P01	0.937504	1.00003	0.993761	0.986536
GRMZM2G703303_P02	1.03333	1.07993	1.00661	1.002
GRMZM2G375904_P01	0.969437	0.966404	0.976412	0.961328
GRMZM2G046186_P01	1.0464	0.943761	1.09435	1.01902
GRMZM2G088919_P01	0.965937	1.18333	1.05531	0.974164
GRMZM2G173416_P02	1.05713	1.03314	1.01016	0.936156
GRMZM2G133943_P01	1.14227	1.13105	0.840624	1.02457
GRMZM2G085438_P01	1.04803	1.08557	1.03863	1.01818
GRMZM2G379021_P02	0.900901	0.928387	0.948113	0.957134
GRMZM6G175135_P02	0.944085	0.891091	0.91832	0.97394
GRMZM2G081221_P01	1.08142	0.998504	0.990973	1.11158
GRMZM2G066636_P01	0.945947	0.968375	0.975857	0.964586
GRMZM2G036169_P01	0.952624	1.05784	1.07415	1.01551
GRMZM2G547542_P01	1.02354	1.02375	1.00379	1.07275
GRMZM2G003992_P01	1.04811	1.10874	0.891599	1.00112
GRMZM2G048883_P01	1.14923	1.17144	1.20393	0.960064
GRMZM2G356423_P01	1.04925	1.04296	1.00768	1.02075
GRMZM2G443881_P01	1.06739	1.24154	1.11775	1.05595
GRMZM2G006790_P02	1.20601	1.24513	1.16384	0.83362
GRMZM2G149843_P02	1.09941	1.05305	1.06429	0.943468
GRMZM2G114098_P01	1.04314	1.05208	1.02029	0.977965
GRMZM2G116840_P04	1.0702	1.02031	1.05746	0.914983
GRMZM2G173563_P01	1.01776	1.13971	0.942951	1.01859
GRMZM2G058289_P01	0.958059	1.16509	1.04912	1.28465
GRMZM2G167463_P01	1.04265	1.04159	1.0146	1.16005
GRMZM2G043127_P01	1.17011	1.45206	1.13167	0.945911
GRMZM2G106056_P02	1.11567	1.02192	1.20324	1.24767
GRMZM2G025480_P01	1.09756	1.25022	1.13408	0.931817
GRMZM2G405581_P02	1.06844	0.980049	1.11801	1.05264
AC203366.4_FGP001	1.00053	0.984896	1.08094	1.01605
GRMZM2G026417_P01	1.00949	1.01193	1.03098	1.04444
AC233888.1_FGP002	1.07962	1.01459	1.06052	1.10576
GRMZM2G371313_P01	0.930086	0.859766	0.988046	0.89097
GRMZM2G057674_P02	0.934813	1.05077	0.610919	1.10057
GRMZM2G068639_P01	0.93509	0.883726	0.927999	1.01878
GRMZM2G014366_P02	1.01941	1.24826	1.01714	1.05924
GRMZM2G099542_P02	1.02616	1.07418	0.959025	1.03853
GRMZM2G053083_P01	1.00462	1.20594	1.10753	1.05297
GRMZM2G172581_P02	0.967425	1.05647	1.03766	0.976072
GRMZM2G036916_P01	1.04506	0.990564	1.05323	1.01452
GRMZM2G374475_P02	0.894281	0.987103	1.01141	1.07712
GRMZM2G107984_P02	0.994141	1.04766	0.951628	1.00697
GRMZM2G019744_P01	1.15886	1.21493	1.02884	0.966021
GRMZM2G030312_P01	1.20862	1.15764	1.13625	1.04933
GRMZM5G868647_P01	1.00462	1.07632	1.05045	1.03138
GRMZM2G116638_P01	1.08286	1.00584	0.987523	1.0556
GRMZM2G542497_P01	0.952994	1.05897	1.06978	1.07908
GRMZM2G320521_P01	1.40437	1.30567	1.19038	1.08569
GRMZM2G025242_P01	1.03299	1.20121	1.12183	1.04704
GRMZM2G177263_P02	1.04514	0.924229	1.02011	1.03779
GRMZM2G004768_P01	1.39844	1.08101	1.9183	0.967852
GRMZM2G090595_P01	0.749765	0.767202	0.759868	0.971674
GRMZM2G150697_P01	1.32808	1.26916	1.03973	1.08226
GRMZM2G360626_P01	1.01024	0.882255	0.896382	1.03105
GRMZM2G017831_P01	1.02251	0.986626	0.855665	1.14334
GRMZM2G553532_P01	0.894069	1.01647	1.08711	1.05803
GRMZM2G479744_P01	1.03174	1.05107	1.06399	1.03698
GRMZM2G176737_P01	0.942732	1.00958	1.04731	1.05242
GRMZM2G332522_P02	1.22898	1.19617	1.04735	0.959095
GRMZM2G050501_P01	1.31647	1.34823	1.1175	1.13459
GRMZM2G055699_P01	0.912632	0.963547	0.972105	1.0462
GRMZM5G884137_P01	0.882802	0.955112	0.980922	0.769854
GRMZM2G147854_P01	1.14346	1.14902	1.09356	1.12199
GRMZM5G868047_P01	1.06473	1.11806	1.01744	0.977505
GRMZM2G097021_P01	1.36329	1.0062	1.13493	1.11719
GRMZM2G326663_P01	0.931496	1.08684	1.04253	1.09015
AC235543.1_FGP003	0.854696	0.857052	0.869181	1.03917
GRMZM2G135722_P01	0.900302	1.0897	0.754394	0.934329
GRMZM2G337819_P01	0.902305	1.07072	0.87514	1.17773
GRMZM2G103079_P01	0.960211	0.913257	0.92059	1.09649
GRMZM2G020523_P01	0.917291	0.913889	0.969333	0.973265
GRMZM2G176647_P01	1.11789	1.25342	1.11978	1.13231
GRMZM2G043154_P01	1.00093	0.994292	0.903104	1.03897
GRMZM2G475059_P01	1.00059	1.10003	0.864946	0.848557
GRMZM2G093101_P01	0.93632	1.01475	1.08603	0.961575
GRMZM2G068294_P01	0.977399	1.06984	1.04001	1.04369
GRMZM2G096303_P01	1.1912	1.08342	1.00763	0.952764
GRMZM2G057557_P01	0.978147	0.976204	1.00198	1.04257
GRMZM2G115504_P01	0.972012	1.13791	0.94227	1.06372
GRMZM2G125032_P01	1.21305	1.32975	0.916774	1.29669
GRMZM2G003068_P01	0.992772	1.00326	1.11062	1.23104
GRMZM2G156296_P01	1.09571	1.00255	0.987885	1.10471
GRMZM2G353276_P01	0.762333	0.897247	0.693114	1.09114
GRMZM2G022645_P01	0.94473	0.867877	0.971605	1.01101
GRMZM2G143457_P01	0.863689	0.957322	1.07832	1.0826
GRMZM2G362848_P01	0.97878	0.977359	0.956291	0.891663
GRMZM2G032856_P01	1.01185	0.92393	0.897705	0.936296
GRMZM2G014395_P01	0.987712	0.950451	0.944943	0.979905
GRMZM2G337242_P01	0.697871	0.894603	0.8298	0.949079
GRMZM2G022782_P01	0.985147	1.17088	1.08592	1.13335
GRMZM2G007385_P01	1.0106	1.12047	0.897815	1.06891
GRMZM2G144362_P06	0.95966	1.03775	1.09009	1.04419
GRMZM2G152179_P01	0.953931	0.921041	1.07215	1.03879
GRMZM2G018716_P01	0.765047	0.918761	0.51799	0.891577
GRMZM2G038374_P01	0.946878	1.0547	0.926881	1.09827
GRMZM2G068158_P01	1.37067	1.17712	1.17501	1.10645
GRMZM2G044908_P01	1.13969	1.03842	1.02692	1.00693
GRMZM5G862325_P01	1.23751	1.07576	0.946088	1.13456
GRMZM2G122431_P01	0.906153	0.841936	0.933394	1.02917
GRMZM2G039385_P04	1.08475	0.969617	0.9776	1.06071
GRMZM2G055802_P01	1.21276	1.07104	1.17328	1.2443
GRMZM6G157558_P01	1.12194	1.12243	1.01482	0.963403
GRMZM2G027198_P01	1.14948	1.04488	1.06478	0.993737
GRMZM2G142063_P01	0.980548	1.03218	1.00548	0.987238
GRMZM2G056335_P01	1.14175	0.92079	1.01189	0.963124
GRMZM2G403007_P01	1.27144	1.46007	1.74111	1.71215
GRMZM5G838433_P01	0.89364	1.0521	1.10872	1.05113
GRMZM2G326116_P01	0.982062	0.9993	1.10946	0.957966
AC233872.1_FGP003	1.06558	1.0324	1.07366	0.962934
GRMZM2G122892_P01	1.0348	1.02802	1.05271	0.962433
GRMZM2G157588_P01	1.08227	0.978351	1.11802	1.05667
GRMZM2G128454_P01	1.02502	0.795356	0.98339	0.666672
GRMZM2G064437_P01	1.4788	1.0933	1.02851	1.13803
GRMZM2G361064_P01	0.725144	0.901648	0.930694	1.00504
GRMZM2G095147_P02	1.15276	1.08895	1.62023	0.858571
GRMZM2G142918_P02	1.02713	1.00886	0.917752	1.04714
GRMZM2G175453_P01	0.915647	0.865793	1.15468	0.815241
GRMZM2G098545_P01	0.866823	1.07443	0.95743	0.783258
GRMZM2G445958_P01	1.26441	1.21743	1.19834	1.08169
GRMZM2G148090_P02	0.741495	0.875518	0.916377	0.829237
GRMZM2G117763_P01	1.1308	1.20072	1.02319	0.919894
GRMZM2G459811_P01	1.06487	0.844962	1.3244	0.964407
GRMZM2G103668_P01	0.549843	0.868487	0.356347	0.845929
GRMZM2G132169_P02	1.10547	1.03058	0.964269	1.22643
GRMZM2G038281_P02	0.747147	0.949663	0.937355	1.04973
GRMZM2G119657_P01	1.12175	0.974386	1.03952	0.955204
GRMZM2G117771_P01	1.20417	1.18471	1.02052	0.878429
GRMZM2G178517_P04	0.906974	1.04051	0.956353	0.992788
GRMZM2G344634_P01	1.27479	1.00085	1.0087	0.74017
GRMZM2G135949_P01	1.01202	1.07142	0.883427	0.937305
GRMZM2G085661_P01	1.62842	1.45831	1.02115	1.03906
GRMZM2G163407_P02	1.02469	1.06147	0.932044	0.89292
GRMZM2G035401_P01	0.845067	0.905347	0.946237	0.885825
GRMZM2G152135_P07	0.999977	1.11939	1.05856	0.893937
GRMZM2G047800_P01	1.1289	0.947897	1.04751	1.02465
GRMZM2G064804_P02	1.21015	1.07827	1.05356	1.16545
GRMZM2G066860_P03	1.44196	1.3026	1.18491	1.07351
GRMZM2G075140_P01	1.97578	1.81763	1.24382	1.07869
GRMZM2G030341_P01	1.1437	1.05502	1.01696	1.01605
GRMZM5G820727_P06	1.08619	1.30514	1.07186	0.925341
GRMZM5G813259_P01	1.00035	1.05967	1.00582	0.9951
GRMZM2G135586_P01	1.02821	0.964155	1.09675	1.12908
GRMZM2G105400_P01	1.0328	1.00353	1.11873	1.01726
GRMZM2G074517_P01	0.949964	1.04631	0.987071	0.977786
GRMZM2G010801_P02	1.30888	1.32315	1.14409	1.03561
GRMZM2G097854_P01	0.948064	1.16599	0.962009	1.02435
GRMZM2G119256_P02	1.02031	1.0664	0.989938	1.01154
GRMZM5G810275_P01	1.15889	0.944775	1.08312	1.08388
GRMZM2G070038_P01	1.06081	1.1131	1.0365	1.07729
GRMZM2G035526_P01	0.971106	1.00008	1.03435	1.06222
GRMZM2G396540_P01	1.40001	1.44342	1.15533	1.04081
GRMZM2G038536_P01	0.97884	1.4184	1.15851	1.09253
GRMZM5G895175_P01	1.03507	1.05944	1.03906	1.0337
GRMZM2G058032_P02	0.923664	0.997179	0.976183	0.987662
GRMZM2G443728_P02	0.975616	0.982834	1.00249	1.03585
GRMZM2G010323_P01	0.999397	1.17897	1.07776	0.97663
GRMZM2G175989_P01	0.721748	0.772004	0.789994	0.905963
GRMZM2G019446_P01	0.943897	0.957641	0.958253	1.01826
GRMZM2G043521_P01	1.28816	1.24394	1.05371	0.962176
GRMZM2G178346_P01	0.891313	0.916146	0.979663	1.12928
GRMZM2G025528_P01	0.87202	0.852148	0.919602	0.954679
GRMZM2G016097_P01	1.30523	1.24183	1.07813	1.04007
GRMZM2G028556_P03	1.13834	1.21185	0.820736	0.959923
AC209898.2_FGP004	0.555428	0.555724	0.719656	0.686201
GRMZM2G165815_P02	1.28263	1.02245	1.0261	0.883703
GRMZM2G030173_P01	1.206	1.10189	1.06479	1.10878
GRMZM2G109967_P02	1.29203	1.27581	1.13318	0.920309
GRMZM2G350319_P02	1.38453	1.63527	1.38092	0.803979
GRMZM2G135691_P01	1.16746	1.06768	1.02371	0.81488
GRMZM2G364373_P01	0.958243	1.0752	1.03472	0.99636
GRMZM2G439311_P02	1.05405	1.07388	0.952066	1.10143
GRMZM2G446895_P01	1.18066	1.20935	1.00151	1.13985
GRMZM2G106810_P01	1.19984	1.18092	1.00927	0.988056
GRMZM5G828302_P03	1.0584	1.27571	0.924795	0.829558
AC208341.4_FGP005	0.965999	0.86741	0.94232	1.05252
GRMZM2G025441_P01	0.953806	1.03511	0.928573	1.04033
GRMZM2G385989_P01	1.20742	1.18199	1.08939	1.06279
GRMZM2G462625_P01	0.907417	1.03445	1.03333	1.10707
GRMZM2G079342_P01	1.14366	1.09646	1.10311	1.00421
GRMZM2G149115_P01	1.22812	1.09611	1.01737	0.887182
GRMZM2G019901_P02	0.957584	0.992139	0.982222	0.977591
GRMZM2G115156_P01	1.2028	1.29454	1.05512	0.960092
GRMZM2G167243_P01	0.949611	1.03474	1.02165	1.06145
GRMZM5G889999_P01	1.00456	1.06404	1.00725	0.959349
GRMZM2G068271_P01	0.778641	0.752686	0.782142	0.870505
GRMZM2G021567_P01	1.30355	1.36093	1.21057	0.904654
GRMZM5G803556_P01	1.11847	1.50969	1.18049	0.997453
GRMZM2G369931_P01	1.14454	1.18327	1.03171	0.981288
GRMZM2G377311_P01	0.932391	0.714858	1.14299	1.07161
GRMZM2G085602_P02	1.04512	1.07341	1.03142	0.870456
GRMZM2G171060_P02	1.23757	1.3725	1.09682	0.837527
GRMZM2G418415_P01	0.925706	0.985413	0.924818	0.907926
GRMZM2G007140_P01	0.957765	0.938991	0.982794	0.957457
GRMZM2G119930_P01	0.875006	0.830568	0.934703	0.931014
GRMZM2G042347_P01	0.94029	1.00798	1.02022	1.0207
AC234171.1_FGP003	1.12107	1.09372	1.02493	0.767775
GRMZM2G009948_P01	1.12105	0.977486	0.968475	0.991111
GRMZM2G053397_P01	1.29267	1.31179	1.17997	1.04512
GRMZM2G143494_P01	0.854342	0.889911	0.74345	1.04672
GRMZM2G052422_P01	1.11027	0.99144	0.945129	1.05854
GRMZM6G768049_P01	1.114	1.03235	0.959065	0.972859
GRMZM2G161809_P01	1.05708	1.04551	0.841728	0.997607
GRMZM2G038217_P01	0.835553	0.975818	0.97195	0.981919
GRMZM2G105855_P01	1.20326	1.13115	1.10979	0.993393
GRMZM2G437859_P02	1.07173	1.26086	0.981263	1.05006
GRMZM2G357595_P01	1.08053	1.13126	1.02451	0.920301
GRMZM2G028902_P01	1.09153	1.17716	1.09496	0.966841
GRMZM2G089461_P01	1.06523	1.00224	0.9375	1.04638
GRMZM2G181542_P01	1.44274	1.42994	1.03832	0.789894
GRMZM2G050596_P01	1.16884	1.15579	1.01403	1.03353
GRMZM2G064600_P01	1.12958	1.16233	1.02196	0.955511
GRMZM5G894932_P01	1.024	1.00621	1.02192	0.985316
GRMZM2G113668_P01	1.01789	0.9721	1.09442	1.00358
GRMZM5G878379_P01	1.07091	1.10965	1.05199	0.948613
GRMZM2G178916_P03	1.08908	1.20565	1.06568	0.991857
GRMZM2G383408_P01	0.936395	0.848151	0.869596	0.851263
GRMZM6G732597_P01	0.893984	0.89562	0.986312	0.915562
GRMZM2G167428_P01	0.889899	0.870292	0.912244	0.938121
GRMZM2G083195_P01	0.955547	1.19013	0.890222	1.00759
GRMZM2G473533_P01	1.02701	1.08285	1.00955	1.04236
GRMZM2G059965_P01	1.38094	1.2632	1.20027	0.856957
GRMZM2G070881_P01	1.11447	1.09362	0.953773	0.969745
GRMZM2G074053_P01	0.953469	1.00426	1.19823	1.05519
GRMZM2G021864_P01	0.984153	1.04086	1.02237	1.00892
GRMZM2G096491_P01	1.13722	0.976959	1.05024	1.03265
GRMZM2G134426_P01	1.0735	1.04759	0.962758	1.11725
GRMZM2G080524_P01	1.19748	1.23935	1.11957	0.999272
GRMZM2G008751_P01	0.972015	1.11496	1.05116	1.01333
GRMZM2G174370_P01	1.2309	1.26181	1.14792	0.978499
GRMZM2G082019_P01	1.08021	0.905035	1.0695	1.02013
GRMZM2G138572_P01	1.24766	1.06368	1.03672	0.769884
GRMZM2G073884_P01	0.787288	0.975763	0.61922	0.920559
GRMZM2G161658_P01	1.08867	1.06125	1.06097	1.01991
GRMZM2G145518_P01	0.915064	0.905304	0.965414	1.02149
GRMZM5G868273_P02	0.999995	0.92313	1.07611	0.950868
GRMZM2G176407_P01	0.99971	1.07789	1.03626	0.989375
GRMZM2G076539_P01	1.03304	1.09034	1.09205	1.17565
GRMZM2G371793_P01	1.0472	1.13353	1.22887	0.922024
GRMZM2G118037_P01	1.122	0.756645	1.17338	0.927809
GRMZM2G019838_P01	1.25486	1.19864	1.17939	0.920482
GRMZM2G139977_P01	0.95815	1.00315	0.937251	0.976783
GRMZM2G096352_P01	1.15497	1.10736	1.01053	0.999616
GRMZM2G404426_P01	0.981716	1.02807	0.863908	1.01151
GRMZM2G146885_P01	1.00718	0.963461	0.922333	1.00947
GRMZM5G824843_P01	0.968107	1.07549	0.975159	1.0112
GRMZM2G153208_P01	0.79023	1.36774	0.607495	1.12234
GRMZM2G151268_P04	1.21298	1.15694	1.09839	0.941424
GRMZM2G029933_P01	1.24951	1.34285	1.12706	1.03756
GRMZM2G138342_P01	0.936312	0.988377	0.932711	0.957506
GRMZM2G032293_P02	0.900115	1.14015	0.954236	0.912162
GRMZM2G099745_P01	1.0531	0.985304	1.12034	0.948662
GRMZM2G113401_P02	1.11638	1.06579	1.11264	1.01649
GRMZM2G023023_P01	1.05271	0.936534	0.893615	0.947047
GRMZM2G174708_P01	0.906036	0.773016	0.95881	1.11303
GRMZM2G097989_P01	1.17197	1.21546	1.12229	1.08548
GRMZM2G171006_P02	1.15209	1.10982	1.05042	1.02293
GRMZM5G883601_P01	1.11494	1.01444	0.880041	1.00104
GRMZM2G114570_P01	1.03107	1.09884	1.0905	1.05349
GRMZM2G071518_P01	1.37673	1.36791	1.0391	1.00965
GRMZM2G043948_P01	1.11255	1.1186	1.12929	1.06494
GRMZM2G484706_P01	0.959394	0.945346	0.920773	0.986001
GRMZM2G017789_P01	1.0958	1.08083	1.0734	1.00441
GRMZM5G833124_P01	0.957811	0.991422	0.978341	1.00923
GRMZM2G026881_P01	1.1105	1.07447	0.911037	1.03016
GRMZM2G179732_P02	1.04702	1.0436	1.02417	1.02423
GRMZM2G034225_P01	1.08351	1.10796	0.991882	0.912832
GRMZM2G173315_P01	0.986749	0.957333	0.918891	0.9131
GRMZM2G392700_P01	1.00317	0.977537	0.998473	1.06059
GRMZM2G424241_P03	1.03043	1.01483	1.07924	0.972921
GRMZM2G054470_P01	0.978263	0.941086	1.00597	1.01696
GRMZM2G452523_P01	1.34883	1.45592	1.05396	1.01198
GRMZM2G125294_P01	1.04628	1.05442	1.07497	1.05993
GRMZM2G085939_P01	0.974658	1.02547	1.05185	0.963706
GRMZM2G024550_P01	1.16598	1.25116	1.01577	1.00226
GRMZM2G175272_P01	1.24737	1.31368	1.11195	1.00085
GRMZM2G158789_P01	1.12034	1.10542	1.0427	1.00207
GRMZM2G006781_P01	1.2166	1.19474	1.0193	1.02859
GRMZM2G131321_P01	1.20937	1.17975	1.06004	0.959974
GRMZM2G125531_P04	1.26522	1.14746	1.04964	1.04779
GRMZM5G837058_P01	1.22274	1.39552	1.11249	1.00947
GRMZM2G156251_P01	1.02211	0.995045	1.1177	0.999158
GRMZM2G026800_P01	0.987386	0.942082	0.942566	0.969916
GRMZM2G136085_P01	0.97211	0.985768	1.07724	0.889786
GRMZM2G165422_P01	1.07758	1.06359	0.879489	1.18845
GRMZM2G071575_P01	1.14109	1.22332	1.10899	1.01856
GRMZM2G439457_P02	1.2243	1.32532	1.10709	0.949651
GRMZM5G804358_P02	0.972833	1.05901	0.975447	0.94981
GRMZM2G121776_P01	1.06609	1.10364	0.962955	1.00421
GRMZM2G126873_P01	0.980054	1.03376	0.914956	0.996203
GRMZM2G177532_P02	0.984414	1.04521	1.06395	0.98981
GRMZM2G099207_P01	1.1329	1.19553	1.15418	0.991776
GRMZM2G017269_P01	1.32857	1.35762	1.11207	0.969258
GRMZM2G006085_P01	1.19169	1.06412	1.05428	0.903775
GRMZM2G030713_P01	1.12855	1.11398	1.05212	1.04901
GRMZM2G087081_P02	0.912632	0.985862	0.963137	0.988691
GRMZM2G009655_P01	1.01294	1.11533	0.968675	1.03662
GRMZM5G869971_P02	0.929007	0.997532	0.972662	1.0062
GRMZM2G074028_P01	1.07722	0.843298	1.13653	1.02894
GRMZM2G092123_P02	1.03106	1.10192	1.13946	1.01557
GRMZM2G077769_P01	1.12838	1.10239	1.14888	0.989281
GRMZM2G098527_P01	0.965475	1.06447	1.01825	0.933556
GRMZM2G346133_P01	0.959366	0.878433	0.940895	1.02201
GRMZM2G063511_P01	1.20324	1.3816	1.06782	1.05734
GRMZM2G040728_P01	1.0485	1.04401	0.920813	0.990811
GRMZM2G051374_P07	1.07276	1.06818	1.15889	1.04038
GRMZM2G097286_P01	0.911627	0.947197	0.976799	1.11152
GRMZM2G115766_P01	1.48919	1.3969	1.18955	0.854737
GRMZM2G035073_P01	0.907551	0.943368	0.859631	0.956914
GRMZM2G017254_P03	0.991769	1.09496	1.06301	1.07833
GRMZM2G052880_P01	1.04812	1.00261	1.03303	0.981792
GRMZM2G132442_P03	1.11173	1.15278	1.04415	0.947398
GRMZM2G059129_P01	0.760126	0.915732	0.788052	0.977633
GRMZM2G123624_P01	1.33204	1.28592	1.17778	0.957431
GRMZM2G129405_P01	1.01922	1.08846	1.06577	1.01578
GRMZM5G850455_P02	1.37396	1.46013	1.03414	0.987733
GRMZM2G146940_P01	0.98781	0.968302	0.979294	0.988674
GRMZM2G002879_P04	1.1306	1.24672	1.04882	1.07477
GRMZM2G115245_P01	1.30846	1.1395	1.18023	0.960012
GRMZM2G106245_P02	1.13248	1.07243	1.03569	1.04169
GRMZM2G440968_P01	1.20351	1.17585	1.0476	0.889312
GRMZM2G099467_P01	0.925948	1.08949	0.591484	0.954111
GRMZM2G064870_P01	1.26579	1.26383	1.03885	0.975301
GRMZM2G122810_P05	1.13103	1.17745	1.0637	1.04906
GRMZM2G067514_P01	1.09829	1.15044	1.04297	1.0274
GRMZM5G883149_P03	1.09462	1.23902	0.929443	1.01601
GRMZM2G065839_P01	1.07173	1.02653	1.11731	1.03478
GRMZM2G339122_P01	0.834672	0.992277	0.978863	1.03962
GRMZM2G073551_P01	0.955948	1.02316	0.980411	0.988168
GRMZM2G058057_P01	1.32203	1.32805	1.13171	0.896396
GRMZM2G175401_P01	0.633814	0.560356	0.905869	0.786606
GRMZM2G058923_P01	1.07141	1.10921	1.10302	1.07458
GRMZM2G083551_P02	1.00042	1.05457	0.984446	1.00629
GRMZM2G414540_P01	1.14982	1.07825	1.00414	1.07397
GRMZM2G163578_P01	0.857308	0.888946	0.910154	0.91593
GRMZM2G337128_P01	0.95603	1.06446	1.0289	1.01887
GRMZM5G806649_P03	1.13381	1.26301	1.0745	1.03241
GRMZM2G322493_P01	1.05761	1.03003	0.982572	0.982722
GRMZM2G331754_P01	1.10355	0.989464	1.12028	0.995064
GRMZM2G176523_P02	1.06802	0.999051	1.01276	1.01884
GRMZM2G079471_P01	1.05035	1.09627	1.03485	0.941144
GRMZM2G093065_P01	0.913163	1.02721	1.05009	1.01897
GRMZM5G823629_P02	1.16263	1.06364	1.14274	1.04027
GRMZM2G121312_P01	1.09467	1.06608	1.00653	1.07125
GRMZM2G115660_P01	0.897135	1.06601	0.626637	0.973761
GRMZM2G406014_P01	1.07752	1.0457	1.11197	1.02574
GRMZM2G007915_P02	1.147	1.12542	0.985679	0.985486
GRMZM2G045818_P01	1.17232	1.23262	1.09229	0.968185
GRMZM5G883764_P02	1.21791	1.06924	1.14287	0.971846
GRMZM2G306104_P01	1.35084	1.29363	1.10212	1.06127
GRMZM2G152278_P01	1.11022	1.15668	0.98803	0.98923
GRMZM2G359581_P01	1.0586	0.886963	1.1312	0.969923
GRMZM2G057140_P01	0.911826	0.946054	0.950801	1.00232
GRMZM2G075513_P01	1.04328	1.06507	0.994712	1.0043
GRMZM2G391627_P01	1.46244	1.45346	1.24144	1.09545
GRMZM2G098031_P01	0.935716	0.973865	0.83084	1.04481
GRMZM2G045404_P01	0.797079	0.91642	0.840795	1.20775
GRMZM2G439049_P01	1.06711	1.07446	1.07913	0.969867
GRMZM2G128080_P02	1.34037	1.70604	1.19748	0.83272
GRMZM2G147046_P01	1.09978	1.17494	1.04874	1.00602
GRMZM2G098957_P02	1.00453	1.13093	1.09149	1.16161
GRMZM2G064426_P01	1.13152	1.07231	1.09499	1.1016
GRMZM2G345840_P01	0.921867	1.00063	1.00013	0.981414
GRMZM2G055217_P01	1.02284	0.912457	1.03504	0.987463
GRMZM2G113017_P03	0.969783	0.932759	0.990775	0.963435
GRMZM5G866861_P02	0.995631	1.09443	1.03716	0.974924
GRMZM2G390221_P01	0.990397	1.00761	0.993094	1.12126
GRMZM2G090217_P03	1.05794	1.04144	1.01053	1.08327
GRMZM2G357112_P01	0.973514	1.08743	0.946869	1.03335
GRMZM2G425377_P01	1.06614	1.10809	0.987997	0.985619
GRMZM2G057743_P02	1.09904	1.1227	1.08515	1.09573
GRMZM2G104377_P03	1.00988	0.999693	1.10911	1.08897
GRMZM2G013461_P01	1.22215	1.34083	1.01518	0.799782
AC212219.3_FGP005	0.953856	0.99646	0.995134	1.02222
GRMZM2G139141_P01	1.1027	1.20085	1.16876	1.00916
GRMZM2G101502_P01	1.10143	1.13105	1.05329	0.932064
GRMZM2G065461_P01	1.00084	1.06708	1.02552	1.07176
GRMZM2G347808_P01	1.09404	1.06705	0.978541	0.957351
GRMZM2G143791_P01	1.22057	1.37592	1.19592	1.06395
GRMZM2G045581_P01	0.876217	0.932112	0.97506	0.954162
GRMZM2G164547_P01	1.1118	1.10271	1.02084	1.02068
GRMZM2G087201_P01	1.11589	1.08656	0.939384	0.989797
GRMZM2G143525_P01	1.18739	1.24159	1.04575	1.03853
GRMZM2G155512_P03	1.16375	1.06262	1.13005	1.05603
GRMZM2G387890_P01	1.04305	1.03245	0.978065	0.985699
GRMZM2G052670_P01	1.08026	1.07747	1.06456	1.01502
GRMZM2G154316_P01	1.02291	0.96111	1.04007	1.06992
GRMZM2G442404_P01	1.02626	1.03832	1.06162	0.849723
GRMZM5G886561_P03	1.05584	1.0148	1.00997	1.05584
GRMZM2G113495_P01	0.947533	0.920861	0.901551	0.925995
GRMZM2G005350_P02	0.968809	0.975699	1.0187	1.02148
GRMZM2G351417_P02	1.13643	1.21463	1.10387	0.88107
GRMZM2G175177_P01	1.01312	1.00538	1.04974	1.00663
GRMZM2G459642_P01	1.06973	1.11892	1.0759	1.00218
GRMZM2G066373_P01	0.950886	0.953268	0.984073	0.918567
GRMZM2G108138_P01	0.971071	0.918747	0.985614	1.00835
GRMZM2G100333_P01	0.946446	0.974803	0.858798	1.04132
GRMZM2G091143_P01	1.07604	1.04105	1.0242	1.05732
GRMZM2G019106_P01	1.09587	0.961331	1.14997	1.27478
GRMZM2G113990_P05	1.13437	0.939271	1.05467	0.938748
GRMZM2G086994_P01	0.90932	0.922337	0.917448	1.10095
GRMZM2G008353_P01	1.14779	0.800487	0.976191	1.03245
GRMZM2G134313_P01	0.956482	1.00662	0.984552	1.03184
GRMZM2G148790_P02	0.912455	0.999071	0.964331	1.05714
GRMZM2G024533_P01	1.07866	0.970388	1.09199	1.14434
GRMZM2G148904_P01	1.11108	1.02896	1.0147	0.982426
GRMZM2G022061_P05	1.09656	0.985014	1.09953	1.18395
GRMZM2G362949_P04	1.12714	1.23075	1.12322	1.05455
GRMZM2G020920_P01	0.878769	0.96771	0.88448	1.02269
GRMZM2G053908_P01	1.0714	1.05303	1.00072	1.10181
GRMZM2G103579_P01	1.21275	1.23952	1.08115	0.973504
GRMZM2G384293_P03	1.13386	1.22164	1.10343	0.974214
GRMZM2G130651_P01	1.11883	1.02371	1.08061	0.977034
GRMZM2G052562_P02	1.0279	1.19494	1.09819	0.99593
GRMZM2G167741_P01	1.01352	1.07718	1.02291	0.999742
GRMZM2G090865_P03	0.6239	0.740584	0.766692	0.836241
GRMZM2G064212_P02	1.04661	1.0448	0.99295	0.943915
GRMZM2G004138_P01	0.986368	0.956405	0.97162	1.00107
GRMZM2G023392_P01	0.990625	1.05505	0.985546	0.977469
GRMZM2G467356_P01	1.09876	1.03027	1.07311	0.910498
GRMZM2G374812_P01	0.875225	0.949823	1.01101	1.04292
GRMZM2G063262_P01	1.22472	1.1444	1.07591	1.01151
GRMZM5G836588_P01	1.03538	1.06165	0.980941	0.997963
GRMZM2G097568_P01	1.16205	1.24238	1.04547	0.965171
GRMZM2G459291_P01	1.15861	1.30829	1.07184	0.923712
GRMZM2G004111_P01	0.971597	1.17074	0.985033	0.987044
GRMZM2G136918_P03	1.08394	1.27857	1.03018	0.986574
GRMZM2G115372_P01	0.946241	0.901064	1.01513	0.995433
GRMZM2G019681_P01	1.08772	0.995013	1.01641	1.0423
GRMZM2G344993_P01	1.006	0.9693	0.998575	0.934531
GRMZM2G038973_P01	0.765608	0.921176	0.884082	0.976177
GRMZM2G147587_P01	0.909852	1.0142	0.953377	0.942704
GRMZM2G170868_P01	1.05309	1.15821	1.01634	0.919502
GRMZM2G169773_P01	0.987473	1.09706	1.0267	1.04626
GRMZM5G871910_P02	1.06263	1.11031	1.07016	0.991067
GRMZM2G031177_P01	0.988419	1.02539	1.01545	1.0478
GRMZM5G801369_P02	1.03812	1.05494	0.959871	0.982547
GRMZM2G033805_P01	0.972891	1.02969	0.867638	1.00889
GRMZM2G092910_P01	0.959768	1.02222	0.876774	1.04651
GRMZM2G455075_P01	1.00357	0.973364	0.942393	0.972422
GRMZM2G092284_P01	1.1217	1.21203	1.09732	1.03381
GRMZM2G099334_P01	0.98403	1.01758	1.03086	1.04729
GRMZM2G042032_P02	1.14108	0.777471	1.46407	0.879863
GRMZM2G055704_P01	0.770942	0.770639	0.854964	0.894143
GRMZM2G120530_P01	1.083	1.07089	1.20292	1.06794
GRMZM2G047018_P01	1.0333	1.01215	0.915127	1.1178
GRMZM2G051952_P02	0.995933	0.910346	0.88952	0.952612
GRMZM2G132944_P01	1.11602	1.07359	1.16647	0.960587
GRMZM2G000261_P01	0.976647	1.02042	0.953953	1.03187
GRMZM2G342039_P01	1.14823	1.07985	1.00653	1.06906
GRMZM2G173309_P01	1.03895	1.02638	1.129	1.10668
GRMZM2G468439_P02	0.997289	0.897484	0.902707	1.03046
GRMZM6G397851_P01	0.712514	0.660442	0.814034	0.911549
GRMZM2G133756_P01	1.12729	1.1742	1.09619	1.04503
GRMZM2G020761_P01	1.19031	0.95872	0.914053	1.02583
GRMZM2G141241_P01	0.922732	0.884138	0.846195	0.948489
GRMZM2G108115_P01	1.07418	1.14872	1.03775	1.04161
GRMZM2G055458_P01	1.01296	1.06012	0.832126	1.04776
GRMZM2G074270_P01	1.21465	1.09763	1.0579	1.02363
GRMZM2G066612_P03	0.974228	1.07544	0.931307	1.00457
GRMZM5G816015_P01	1.15272	1.15656	1.02706	1.02531
GRMZM2G428964_P01	1.2385	1.17516	1.03195	1.0317
GRMZM2G300258_P01	0.989467	1.01942	1.01046	0.991018
GRMZM2G438386_P01	1.39498	1.31326	1.11207	1.09037
GRMZM2G337191_P01	1.13073	0.85858	0.957429	0.962922
GRMZM2G059981_P01	1.03516	1.06014	1.09576	1.06699
GRMZM2G372930_P01	1.03042	1.08754	1.05815	1.02448
GRMZM2G319465_P01	1.00246	0.923496	0.955307	1.0525
AC209257.4_FGP008	1.01297	1.49719	1.06022	0.96717
GRMZM2G159142_P01	0.998848	1.29073	1.25798	0.963445
GRMZM2G019783_P01	0.83353	0.926527	1.02552	1.03212
GRMZM2G054267_P01	0.910428	0.940692	0.975357	1.02333
GRMZM2G413193_P01	1.03147	0.939046	1.03439	1.07512
GRMZM2G092475_P02	0.812686	0.916623	0.991243	0.998435
GRMZM2G178190_P01	1.09909	1.09294	1.10094	0.994754
GRMZM2G074040_P01	0.847807	0.801828	0.866328	0.981715
GRMZM2G078252_P01	1.03633	0.989431	1.04896	1.07698
GRMZM2G087671_P01	1.12908	1.10834	1.03499	1.08934
GRMZM2G028302_P01	1.02914	1.24267	0.940524	0.914617
GRMZM2G358618_P02	1.05704	1.00632	1.09261	0.945271
GRMZM2G090715_P01	1.02704	1.08897	0.993297	1.06755
GRMZM2G318010_P01	1.00123	1.01984	0.948889	0.980342
GRMZM2G032977_P01	1.05238	0.982839	1.05214	0.959355
GRMZM2G046966_P03	0.944702	1.05243	1.03718	1.08426
GRMZM2G096655_P01	1.08344	1.09308	1.08585	1.12
GRMZM2G134846_P01	0.607338	0.707514	0.771786	0.952718
GRMZM2G023833_P01	1.22191	1.25409	1.24847	0.939887
GRMZM2G029001_P01	0.819045	0.900975	0.924003	1.00024
GRMZM2G137329_P01	0.992363	1.26939	1.36781	1.0939
GRMZM2G097747_P01	0.967236	0.945445	0.961249	1.03263
GRMZM2G071987_P01	1.22951	0.874088	0.869798	1.03323
GRMZM2G097843_P01	0.858293	0.913149	0.969724	1.00417
GRMZM6G832911_P01	1.16758	1.14238	1.05816	1.0138
GRMZM2G056116_P01	0.982815	1.01784	0.979129	1.00288
GRMZM2G146644_P01	0.930178	0.895115	0.93144	1.01781
GRMZM2G056645_P01	1.04693	1.07708	0.963855	1.05241
GRMZM2G151285_P02	1.22483	1.14111	1.21144	1.02174
GRMZM2G094589_P01	1.05517	1.04755	1.1245	1.02848
GRMZM2G149201_P01	1.09681	1.1841	0.979973	0.942737
GRMZM2G043174_P01	1.00564	0.981393	1.06166	1.06898
GRMZM2G409430_P02	1.02745	1.0339	1.02235	1.04217
GRMZM2G071714_P01	1.04883	1.02504	0.99644	1.01673
GRMZM2G152781_P01	1.15095	0.998361	1.10778	0.953316
GRMZM2G324297_P02	1.00139	0.894019	1.05592	1.06456
GRMZM2G180979_P01	0.848213	1.00312	0.914809	0.953792
GRMZM2G021015_P01	1.19224	1.07909	1.16047	1.09644
GRMZM2G035202_P01	0.941197	0.987513	1.01574	0.949217
GRMZM2G054621_P01	0.984671	0.976508	1.19945	1.00367
GRMZM2G074107_P02	0.893592	0.820902	0.944565	1.07468
GRMZM2G169929_P01	0.992753	0.947201	1.02347	1.05087
GRMZM2G079127_P01	0.94612	0.970849	1.01759	0.956079
GRMZM2G128981_P01	0.928857	0.986214	1.01235	1.01712
GRMZM2G080129_P01	1.11759	1.16648	1.06914	1.06369
GRMZM2G083344_P02	1.01619	1.14633	1.0155	1.00226
GRMZM2G168588_P01	1.14888	1.15422	1.04355	0.991603
GRMZM2G181453_P01	1.10132	1.0141	1.07682	1.06757
GRMZM2G131815_P01	1.04101	1.19054	0.903796	0.986095
GRMZM2G024730_P01	0.846871	1.01836	0.921017	1.05556
GRMZM2G039650_P01	1.04763	0.949911	1.03626	1.05524
GRMZM2G038588_P01	1.01867	1.05332	1.00926	1.00491
GRMZM2G148194_P05	1.01865	1.11209	1.02683	1.01948
GRMZM2G008095_P01	1.04105	1.06875	1.02648	1.00764
GRMZM2G139250_P01	1.25709	1.24492	1.13006	1.10121
GRMZM2G420910_P01	0.90014	0.893017	0.993509	0.990488
GRMZM2G074241_P01	0.859061	0.972143	0.905951	1.00896
GRMZM2G139600_P01	1.12937	1.12512	1.18672	0.986445
GRMZM2G166507_P01	1.06075	1.24942	1.06412	0.949726
GRMZM2G153722_P01	1.05168	1.25886	1.00206	0.962171
GRMZM2G104258_P01	1.04642	0.91164	1.05692	1.01213
GRMZM2G085301_P01	0.808801	0.852951	0.889215	0.95632
GRMZM2G045716_P01	1.00054	0.912012	1.06918	1.02529
GRMZM2G055807_P02	0.944794	0.939369	0.926443	1.03191
GRMZM5G879240_P01	1.16204	1.11704	1.05964	0.987364
GRMZM2G312944_P01	1.21382	1.07808	1.06499	1.087
GRMZM2G102714_P01	1.04037	1.06407	1.18614	0.954861
GRMZM2G057237_P01	1.1165	1.1711	0.998082	0.934971
GRMZM2G097726_P02	0.930207	0.873395	0.98243	0.982632
GRMZM2G141600_P01	0.991985	0.92035	1.03809	1.07677
GRMZM2G419969_P01	1.20483	1.09111	0.992665	0.993992
GRMZM2G128918_P01	0.959083	0.981278	0.986933	0.991994
GRMZM2G034511_P02	1.15117	1.22306	1.03601	0.93663
GRMZM2G092481_P01	1.11999	1.26478	1.14107	1.03132
GRMZM2G082683_P01	1.1197	1.17522	1.04637	1.02633
GRMZM6G675851_P01	1.11396	1.06393	1.0727	0.999429
GRMZM2G313649_P06	1.18689	1.18098	1.12066	1.05317
GRMZM5G884270_P02	0.853833	1.16843	1.3743	1.12349
GRMZM5G889321_P01	1.00616	1.08357	0.990726	1.03697
GRMZM2G023105_P01	0.845353	0.892087	1.00523	1.09101
GRMZM2G030529_P01	0.874232	0.891369	0.910059	0.970141
GRMZM2G037226_P02	1.0158	0.963277	1.06768	1.0653
GRMZM2G135655_P01	0.951967	0.963589	0.975733	1.06195
GRMZM2G028709_P01	1.04291	1.1068	1.00681	1.01149
GRMZM2G405815_P02	1.01933	1.04677	1.04301	1.05346
GRMZM2G003769_P01	0.971635	1.08512	0.892405	0.981048
GRMZM2G038066_P01	0.950239	1.01313	1.03895	1.08239
GRMZM2G161459_P02	0.902491	0.832918	0.871038	1.06497
GRMZM2G042127_P01	1.01033	0.969015	1.01271	1.05061
GRMZM2G041799_P01	1.1829	1.13674	1.01867	1.13758
GRMZM2G150201_P03	1.11406	1.17051	1.04453	0.969441
GRMZM2G134230_P01	1.28291	1.30199	1.12539	0.944974
GRMZM2G320708_P01	0.965506	1.11093	1.12955	0.944135
GRMZM2G399858_P02	0.99208	1.05598	1.02692	1.07015
GRMZM2G149543_P01	1.09737	0.922139	1.18584	1.1943
GRMZM2G042371_P01	1.02417	1.15475	0.928176	1.01721
GRMZM2G114888_P02	1.26466	1.41643	1.24091	0.973289
GRMZM2G148810_P01	0.88412	1.09039	0.979264	1.03048
GRMZM2G061078_P03	1.26034	1.19273	1.19626	0.933807
GRMZM2G449355_P02	0.935246	0.935135	1.07997	0.950192
AC200210.1_FGP006	0.979772	1.02241	0.965092	1.00468
GRMZM2G107491_P02	0.806434	0.801019	0.834177	0.965909
GRMZM2G312738_P01	0.979357	1.0802	1.07328	1.03634
GRMZM2G333923_P01	1.00411	1.0406	1.0283	1.05021
GRMZM2G447795_P01	1.08609	1.0217	0.926996	0.993738
GRMZM2G123940_P01	1.33561	1.10503	0.904509	1.08353
GRMZM2G158205_P01	1.37017	1.69453	1.05524	1.06029
GRMZM2G066485_P01	0.9833	1.06439	0.967005	0.996214
GRMZM2G060540_P01	0.988709	0.941677	1.0339	1.12809
GRMZM2G065066_P01	0.84914	0.878977	0.870927	0.961682
GRMZM5G800853_P01	1.23092	1.33216	0.996945	1.01053
GRMZM5G899390_P01	1.093	1.13036	1.0139	0.955458
GRMZM2G178801_P01	0.99718	1.10974	1.04533	1.07475
GRMZM2G451357_P01	1.02596	0.971608	1.00616	0.977519
GRMZM2G071582_P02	0.905256	0.912243	0.931762	1.005
GRMZM2G095043_P01	1.1187	1.13519	1.02865	1.01924
GRMZM2G063972_P01	0.801735	0.9998	1.15407	1.0123
GRMZM2G027420_P01	1.13871	1.09839	0.934303	1.01417
GRMZM2G457415_P01	1.07974	0.848588	0.875753	1.04563
GRMZM2G090226_P01	0.866865	0.901304	0.957431	0.997513
GRMZM2G007060_P01	0.957716	0.920792	1.00495	1.08312
GRMZM2G133749_P02	1.09065	1.07132	1.05868	1.06947
GRMZM2G124617_P01	1.07625	0.971496	0.955317	0.975109
GRMZM2G140832_P01	0.999387	1.18626	1.31371	1.00746
GRMZM2G170299_P01	1.05709	1.10035	0.960347	1.08885
GRMZM2G020187_P01	1.12857	1.20717	1.1018	0.995078
GRMZM5G861678_P06	1.01815	0.984094	1.01532	0.979892
GRMZM2G121565_P01	0.910868	0.94326	0.897969	1.0047
GRMZM2G152929_P03	0.970027	1.02061	0.988197	0.984996
GRMZM2G494600_P01	1.04557	1.11895	0.98802	1.0503
GRMZM2G305582_P01	0.93371	0.91501	1.0052	1.04124
GRMZM2G128663_P01	1.07153	1.05686	1.10815	1.06654
AC197699.3_FGP003	1.06817	0.997433	0.96563	1.02596
GRMZM2G111510_P01	1.22596	1.21293	1.15451	1.17263
GRMZM2G178602_P01	1.06955	1.15232	1.03602	1.02191
GRMZM2G028307_P02	0.94159	0.975462	0.948016	1.00298
GRMZM2G401869_P01	0.903035	0.972333	0.974191	1.17079
GRMZM2G097249_P01	0.911153	0.933554	1.13928	1.07359
GRMZM2G124096_P01	1.25861	1.12312	1.07782	1.09108
GRMZM2G040079_P01	1.03414	1.03328	1.0289	0.955767
GRMZM2G057853_P01	1.05201	1.01236	0.988837	1.02622
GRMZM2G377887_P01	1.02726	1.15061	1.05973	1.07289
GRMZM2G149150_P01	1.05071	0.881724	1.08884	1.09115
GRMZM6G474234_P01	1.02945	0.99225	1.0142	0.985534
GRMZM2G166897_P01	1.10252	1.03331	1.03322	1.02399
GRMZM2G036905_P01	1.06109	1.02056	1.18495	0.977099
GRMZM2G180720_P03	1.06275	1.14885	1.12749	1.03633
GRMZM2G162690_P01	1.14454	1.06906	1.06543	1.04918
GRMZM2G106622_P01	0.957528	0.877907	0.97879	1.08049
GRMZM2G028132_P01	1.17153	1.1847	0.908173	1.00895
GRMZM2G005646_P01	1.08089	0.917015	1.01546	1.05056
GRMZM2G157207_P05	1.16726	1.08918	0.972915	0.899509
GRMZM2G135739_P01	0.877164	0.852985	0.741358	0.998247
GRMZM2G043310_P01	1.10638	1.10582	1.05991	1.05954
GRMZM2G116563_P01	1.09036	1.11352	1.04962	0.931825
GRMZM2G409839_P01	0.943473	1.06859	1.10816	1.05311
GRMZM2G097662_P01	1.0036	0.858741	0.91531	1.06567
GRMZM2G147332_P01	0.971496	0.928746	1.04886	1.01876
GRMZM2G134866_P01	0.996918	0.909702	1.04128	0.998446
GRMZM2G148811_P01	1.08267	1.02344	1.05965	1.07937
GRMZM2G073861_P03	0.808595	0.82834	0.927176	0.970891
GRMZM2G083642_P02	1.13589	1.13565	1.08604	1.05826
GRMZM2G118385_P01	0.999145	1.07151	1.01873	1.13067
GRMZM2G484880_P02	0.998505	1.16453	1.04787	1.03428
GRMZM2G081910_P01	0.881588	0.936104	0.976812	0.985099
GRMZM2G062554_P01	0.910106	0.941998	0.9128	1.06835
GRMZM2G096946_P01	1.04968	1.08237	1.02788	1.15091
EF517601.1_FGP010	1.02315	0.955865	1.03692	1.07721
GRMZM2G064390_P01	0.984424	0.940859	1.01583	1.05188
GRMZM2G125977_P01	0.834128	0.804373	1.03994	0.922197
GRMZM2G180430_P02	1.02865	1.09036	0.995776	0.971073
GRMZM2G083788_P01	0.891005	0.897938	0.960884	0.964059
GRMZM2G056145_P01	1.06929	0.967187	1.05804	1.07913
GRMZM2G145775_P01	0.978194	1.08072	1.11793	1.07365
GRMZM5G878153_P01	1.06652	1.03533	1.00386	1.07417
GRMZM2G163157_P01	1.05828	0.870302	1.05846	1.13249
GRMZM2G176977_P02	1.10555	1.0953	1.02149	1.00642
GRMZM2G046658_P02	0.983183	0.995395	1.04568	1.05475
GRMZM2G049424_P01	1.09978	1.1972	1.12024	0.94469
GRMZM2G022229_P01	1.17124	1.0072	1.18033	1.03783
GRMZM2G077809_P02	0.785738	0.847776	0.939001	0.988845
AC210003.2_FGP015	0.9514	1.11296	1.14877	0.915263
GRMZM2G157350_P01	0.863111	0.932688	0.878558	0.96618
GRMZM2G013115_P02	0.928244	0.90666	1.1307	1.06359
GRMZM2G504910_P02	1.10102	1.15897	1.1103	0.925472
GRMZM2G018018_P01	0.875069	1.03645	0.888073	1.07512
GRMZM2G107562_P01	0.781771	0.799858	0.832685	0.966136
GRMZM2G100920_P02	0.961868	1.29627	0.977513	1.07797
GRMZM2G170532_P02	1.04256	0.859129	1.0423	0.87186
GRMZM2G118917_P01	0.952602	1.19873	0.927778	1.07315
GRMZM2G143102_P01	1.05479	1.12957	1.00099	1.04417
GRMZM2G158918_P01	0.887704	1.06716	0.94258	1.01236
GRMZM2G078440_P01	1.10311	1.07951	1.04444	1.07311
GRMZM2G106647_P01	1.11671	1.09468	0.957728	0.982786
GRMZM2G371375_P01	1.29917	1.30742	1.17211	1.15151
GRMZM5G876434_P04	1.01533	1.15146	1.09164	1.07265
GRMZM5G867390_P01	0.932112	0.932076	1.01789	0.995695
GRMZM2G155837_P02	1.02522	1.03631	0.969908	1.05574
GRMZM2G139093_P02	1.07884	0.995528	1.03915	1.04549
GRMZM2G022054_P05	0.997917	0.944903	1.28734	0.973082
GRMZM2G137961_P01	1.28056	1.42269	1.17197	1.07003
GRMZM2G176056_P01	1.03498	1.09424	1.04217	0.965961
GRMZM2G104269_P01	0.905056	0.886553	0.994764	0.971199
GRMZM2G446625_P03	0.897574	0.978905	0.916295	1.06715
GRMZM2G095810_P01	1.14169	1.07731	1.00183	1.15978
GRMZM2G114513_P01	1.14234	0.992492	1.02453	1.01623
GRMZM2G004106_P01	0.967813	0.982649	0.981912	1.03955
GRMZM2G343080_P01	1.20081	1.28401	1.12212	1.01462
GRMZM2G055643_P03	1.06183	1.14264	1.12788	1.07297
GRMZM2G089149_P03	0.922019	0.99522	0.986664	1.03609
GRMZM2G106588_P01	0.936112	1.03617	0.96933	1.1032
GRMZM2G156517_P01	1.00966	1.1481	0.904886	1.01221
GRMZM2G130333_P01	0.980279	0.970102	0.986069	1.00901
AC210013.4_FGP006	0.974573	0.997762	1.03008	1.02222
GRMZM2G085411_P01	0.950403	0.930496	0.89127	1.01294
GRMZM2G068471_P01	1.24029	1.43557	1.04235	0.997156
GRMZM2G058447_P01	0.873413	1.15476	0.953466	1.00212
GRMZM2G062481_P01	1.62325	1.57215	1.10956	0.883483
GRMZM2G023387_P01	0.897454	0.942803	0.989705	1.02882
GRMZM2G037485_P01	0.883915	1.06291	0.602171	1.05556
GRMZM2G390400_P02	1.03252	1.022	0.989595	1.01651
GRMZM2G052336_P02	1.0869	0.867501	1.11944	1.11151
GRMZM2G088469_P01	0.909084	0.793846	0.786578	1.03384
AC203985.4_FGP005	1.2914	1.27979	1.08164	0.945048
GRMZM2G072529_P01	0.885767	1.04543	1.05177	0.942961
GRMZM2G047867_P01	1.00277	1.02723	0.979929	1.08112
GRMZM2G115398_P01	1.15286	1.11865	1.02643	1.13755
GRMZM2G096591_P01	0.990424	0.925222	0.998898	1.07192
GRMZM2G128434_P01	0.94653	0.892602	0.965697	0.977737
GRMZM2G302045_P02	0.987232	0.953399	0.977562	1.04317
GRMZM2G422938_P01	1.08058	1.12417	1.14761	1.05222
GRMZM2G004377_P02	0.860532	0.851511	0.93854	1.05057
GRMZM5G897988_P01	1.29196	1.04661	1.16644	1.33493
GRMZM2G074099_P01	0.856946	1.06137	0.960939	1.015
GRMZM2G028570_P01	1.1692	1.00977	1.19182	1.00849
GRMZM5G855891_P01	1.04909	1.00033	0.971518	1.05366
GRMZM2G137715_P03	1.01974	1.2875	1.05143	0.905215
GRMZM2G170632_P02	1.09135	1.28472	1.06916	1.16087
GRMZM2G088961_P01	1.20538	0.971187	1.06298	1.12586
GRMZM2G057328_P01	1.1573	1.09723	1.04416	0.990351
GRMZM2G152549_P01	1.09349	1.04338	1.00425	1.09542
GRMZM2G074805_P01	1.24075	1.28815	1.12994	0.978958
GRMZM2G128268_P01	0.752148	0.879716	0.81532	0.976427
GRMZM2G130305_P01	0.962106	1.06473	0.910084	0.954904
GRMZM2G141009_P01	0.966332	0.911452	1.05181	0.995639
GRMZM2G027272_P01	0.836464	0.872226	0.873426	1.21669
GRMZM2G071292_P01	1.02262	0.975002	1.03522	1.05079
GRMZM6G132224_P01	1.83901	2.0578	1.14251	0.997799
GRMZM2G433162_P01	0.982657	1.01048	0.967981	1.05015
GRMZM2G368398_P01	0.975116	1.11616	0.981215	1.02278
GRMZM2G126496_P02	0.803979	1.03905	1.00593	1.04671
GRMZM2G158526_P02	1.10389	1.05028	0.940386	1.09637
GRMZM2G018044_P01	1.1032	0.966509	1.03672	1.09655
GRMZM2G350626_P03	0.97302	1.02382	1.0361	0.955616
GRMZM2G005980_P01	1.27213	1.3287	1.1099	0.90757
GRMZM5G805350_P01	0.842089	0.878756	0.861698	1.01412
GRMZM2G123558_P02	0.979747	0.787884	1.02894	0.89165
GRMZM2G574534_P02	0.918988	1.14786	0.960311	1.06222
GRMZM5G889520_P01	1.04642	0.858543	1.03928	0.865033
GRMZM2G063287_P01	1.57557	1.38396	1.477	1.11822
GRMZM2G085675_P01	1.16419	1.03809	1.09584	1.07273
GRMZM2G425211_P01	0.95819	1.02036	0.946598	1.01144
GRMZM2G300348_P02	0.947402	1.03683	1.0014	0.912452
GRMZM2G090576_P01	1.19465	1.20932	0.997707	1.03231
GRMZM2G113761_P02	1.15839	1.0175	1.21232	1.04668
GRMZM2G162764_P01	0.997397	0.942408	1.02983	0.960914
GRMZM2G034975_P01	1.02515	1.01319	1.03663	1.00748
GRMZM2G058227_P01	1.12193	0.956559	0.980267	0.994016
GRMZM2G024293_P01	0.987617	1.10644	1.01258	1.01743
GRMZM2G131912_P01	0.982203	1.0266	0.981687	0.959272
GRMZM2G096412_P01	0.895785	0.963221	1.04453	0.983431
GRMZM5G855347_P02	0.615393	0.644831	0.814287	0.809686
GRMZM2G019090_P01	1.07958	1.11011	1.04695	0.949318
GRMZM2G157384_P01	1.2733	1.17773	1.13993	1.09067
GRMZM2G034417_P02	0.954195	1.02907	0.971905	1.00079
GRMZM2G408834_P01	0.967355	1.02105	1.05886	1.01683
GRMZM6G007923_P01	1.31579	1.15588	1.14197	1.06095
GRMZM2G108153_P01	0.932834	1.13131	0.840127	1.10574
GRMZM5G891783_P02	0.962891	0.960309	1.01275	1.10288
GRMZM2G146463_P02	0.941	1.00882	1.08707	1.02925
GRMZM5G899349_P02	0.970401	1.16064	0.966138	0.800125
GRMZM2G137816_P01	0.968082	1.10514	0.889033	0.741845
GRMZM2G061702_P01	0.894797	0.965485	1.03482	1.01732
GRMZM2G105184_P01	0.857595	0.899474	0.939595	1.05158
GRMZM2G012942_P01	0.945795	1.19994	1.20384	1.06014
GRMZM2G131087_P07	1.17201	0.977688	0.921845	0.923796
GRMZM2G132000_P03	1.02456	1.06323	1.04385	0.770046
GRMZM5G801031_P02	1.15687	1.05365	1.15346	1.04316
GRMZM5G862931_P01	0.935056	0.998888	0.969426	1.02275
GRMZM2G414915_P01	1.15245	1.14229	1.06809	1.04435
GRMZM2G122302_P01	0.935545	0.996063	0.945798	0.934979
GRMZM2G047968_P03	0.863397	0.853005	0.893728	1.03151
GRMZM2G032910_P01	1.21533	1.27092	0.970086	1.07106
GRMZM2G102404_P01	1.06795	1.05135	1.00706	0.999833
GRMZM2G097641_P01	1.0096	0.975157	1.01126	1.04012
GRMZM2G083058_P01	0.98775	0.992666	1.09844	0.950534
GRMZM2G054387_P02	0.906214	0.960181	0.917302	0.873405
GRMZM2G008765_P01	0.871141	0.873216	1.03822	1.03806
GRMZM2G004183_P01	1.20033	1.22205	1.13387	1.04217
GRMZM2G127080_P02	0.96586	1.00834	0.988681	0.973968
GRMZM2G042008_P01	1.30539	1.24399	1.17796	1.09208
GRMZM2G061681_P02	1.03508	1.1228	0.958923	0.972745
GRMZM5G814057_P01	1.06409	1.10592	1.0701	1.05068
AC196156.3_FGP003	1.15601	1.13507	1.06325	0.859426
GRMZM2G137312_P01	1.08382	1.07027	1.04284	0.89511
GRMZM2G056539_P02	1.0279	1.05387	1.07829	1.095
GRMZM2G106552_P01	1.29232	0.86114	0.928099	0.950269
GRMZM2G084547_P01	1.18954	1.16377	0.997339	0.937787
GRMZM2G058595_P01	1.08861	0.955659	0.928997	0.963333
GRMZM2G111501_P01	0.813527	0.917555	0.873042	0.958613
GRMZM2G465169_P02	1.29664	1.25368	1.2401	1.10963
GRMZM2G011513_P01	0.982029	1.09558	1.04043	0.964384
GRMZM2G040090_P01	1.15611	1.12119	1.11906	1.0782
GRMZM2G170137_P03	1.08419	1.11886	0.996628	0.967017
GRMZM2G132593_P03	1.01746	1.03351	0.954543	1.02666
AC199526.5_FGP003	0.920911	1.09433	1.09149	1.06591
GRMZM2G078480_P01	0.987101	0.937133	0.930217	1.00337
GRMZM2G054765_P01	1.11453	1.32856	1.00363	1.08861
GRMZM2G062396_P01	1.42596	1.43056	1.14799	0.992419
GRMZM2G170382_P02	1.03267	1.06142	0.997731	1.04288
GRMZM2G448330_P01	1.04901	0.994854	1.04251	1.0018
GRMZM2G339503_P01	1.05765	1.02291	0.95546	0.990178
GRMZM2G021794_P01	1.46968	1.27184	1.19415	1.11358
GRMZM2G180815_P01	1.1954	0.911603	1.05199	1.17731
GRMZM2G139210_P03	1.16957	1.05601	1.04263	1.01159
GRMZM2G307992_P03	0.806822	0.882638	1.02476	0.972914
GRMZM2G024159_P02	1.3022	1.1772	1.22435	1.05213
GRMZM2G165966_P01	1.27591	0.987761	1.01041	0.986896
GRMZM2G125494_P01	1.1034	1.16837	0.95637	0.964693
GRMZM2G158662_P01	1.07447	1.13374	1.03267	0.970095
GRMZM2G072415_P01	0.96389	1.13366	1.00292	0.980996
GRMZM2G155096_P03	1.13463	0.983664	1.02511	1.05937
GRMZM2G379780_P01	1.115	0.868645	1.0818	1.1618
GRMZM2G113378_P01	0.867854	0.970526	0.700991	1.13203
GRMZM2G524711_P02	1.1767	1.03966	1.18344	0.996911
GRMZM2G384338_P01	1.56787	1.22105	1.25541	1.14367
GRMZM2G135013_P01	0.961955	1.02941	1.0496	0.946834
GRMZM2G048281_P02	1.00715	0.977084	1.06126	1.03383
GRMZM2G047298_P01	1.07621	0.9849	1.1386	0.992345
GRMZM2G024109_P01	1.04153	1.08917	1.03517	0.945782
GRMZM2G000710_P01	1.1355	1.15535	0.976312	0.947002
GRMZM2G101408_P02	1.04431	1.1552	1.05035	0.834737
GRMZM2G090300_P01	1.13666	1.23528	1.11169	1.07128
GRMZM2G073693_P01	0.785221	0.905035	0.877662	0.988459
GRMZM2G025078_P01	1.07312	1.0928	0.981219	0.912217
GRMZM2G004858_P02	0.960239	1.0306	0.882998	1.09111
GRMZM2G703928_P01	1.12033	1.01579	1.17682	0.968721
GRMZM2G019746_P02	1.05674	1.00523	1.08436	0.990757
GRMZM2G144843_P01	1.12539	1.16064	1.03409	0.972516
GRMZM5G872417_P01	1.0857	1.19391	1.04869	0.883674
GRMZM2G021704_P02	1.12794	1.02935	1.03649	0.946557
GRMZM2G178169_P01	0.99526	0.972449	1.12667	1.01042
GRMZM2G138527_P01	1.39015	1.28808	1.1201	0.84237
GRMZM2G094959_P01	1.05714	1.05676	1.02103	1.08357
GRMZM5G855200_P02	1.13646	1.05688	1.00847	0.933115
GRMZM2G094072_P01	1.09736	1.22317	1.03865	1.01437
GRMZM2G070825_P01	1.16253	1.00676	1.24853	1.05544
GRMZM2G096247_P01	1.40937	1.35126	0.998446	0.739254
GRMZM2G060001_P01	1.09966	0.863299	0.949446	1.03202
GRMZM2G024437_P01	1.01382	0.991901	0.956503	1.02749
GRMZM2G420055_P01	1.01249	1.00433	1.05248	1.01656
GRMZM2G058479_P01	1.03127	1.00986	1.06573	0.947457
GRMZM2G003734_P01	1.06526	1.08259	1.02101	0.998551
GRMZM2G446515_P05	0.944331	1.10433	0.997282	0.972672
GRMZM2G017957_P01	1.04882	1.00847	1.06392	1.04051
GRMZM2G107163_P01	0.968721	0.960994	1.05456	1.01652
GRMZM2G373175_P01	0.999019	1.08122	0.982697	1.01423
GRMZM2G053925_P01	0.894492	0.84354	0.94141	0.937202
GRMZM2G044383_P01	1.10573	1.16626	0.753282	0.993843
GRMZM2G106250_P01	0.973348	1.03274	0.916226	0.998769
GRMZM2G000326_P02	1.32133	0.967398	1.0887	0.994508
GRMZM2G166082_P02	0.992484	0.901253	0.985104	0.997104
GRMZM2G017305_P01	1.00811	1.12375	1.02007	1.04033
GRMZM2G159002_P01	1.13478	1.10584	1.08809	1.09641
GRMZM2G097605_P01	1.08561	1.12833	1.13471	1.01591
GRMZM2G174549_P01	1.02976	1.00638	0.993039	1.03571
AC234520.1_FGP005	0.986751	1.0079	1.09189	1.04363
GRMZM2G157046_P01	1.18991	1.24203	1.03587	0.77485
GRMZM2G323912_P02	0.935768	1.06049	0.991977	0.991987
GRMZM2G122199_P01	0.928604	1.01769	1.08138	0.989143
GRMZM2G051984_P02	1.00769	0.972767	0.951098	0.948747
GRMZM2G305159_P02	1.02235	1.0436	0.993221	1.00732
GRMZM2G058407_P01	1.23719	1.17635	1.03153	0.943857
GRMZM2G100260_P02	0.996102	1.30313	1.11012	1.11084
GRMZM2G079436_P01	1.01197	1.0785	0.934343	1.22162
GRMZM2G034622_P02	1.10949	0.991363	1.02475	0.949784
GRMZM2G072080_P01	1.21659	1.39305	1.03938	1.03026
GRMZM2G025470_P01	1.04644	0.946838	1.09972	0.942954
GRMZM2G034985_P01	1.01472	1.04383	1.0426	1.01365
GRMZM2G071745_P02	1.22193	1.33718	1.22186	0.953247
GRMZM2G107757_P02	1.0929	1.05174	1.00615	0.928773
GRMZM2G065908_P02	1.17655	1.00738	1.02555	1.08922
GRMZM2G045366_P01	1.26337	1.12913	1.14839	1.05553
GRMZM2G053319_P01	1.16983	1.28798	1.06941	0.916128
GRMZM2G401050_P03	1.02653	1.13497	1.0942	1.07801
GRMZM2G024976_P01	0.86855	0.822037	0.873587	0.961998
GRMZM2G015090_P02	1.17941	1.17537	1.08355	0.96016
GRMZM2G161611_P01	0.988969	0.991236	0.928769	1.05141
GRMZM2G010953_P02	0.978574	1.12179	1.04932	0.974324
GRMZM2G146553_P01	0.911064	0.891073	0.946192	0.866897
GRMZM2G380432_P01	1.20828	0.847464	1.00324	1.12626
GRMZM2G398288_P01	1.00757	0.960958	0.957193	1.03761
GRMZM2G029101_P01	1.00523	1.10877	0.942671	0.969988
GRMZM2G116902_P01	1.05901	0.867917	1.02603	1.0157
GRMZM2G076985_P01	1.10258	1.16397	1.12208	1.02661
GRMZM2G146475_P01	1.04875	1.34039	1.06599	0.840322
GRMZM2G133029_P01	0.876278	0.888311	0.982967	1.11322
GRMZM2G159678_P02	1.00103	0.995916	1.01413	1.05894
GRMZM2G103721_P01	0.974636	1.01605	1.01482	0.944408
GRMZM2G019876_P01	1.1663	1.02303	0.969418	0.974679
GRMZM2G001551_P02	0.966533	1.09368	0.986513	0.988968
GRMZM2G090018_P02	0.875422	1.0066	0.993246	0.979704
GRMZM2G080542_P01	1.12937	1.16384	1.11915	0.938773
GRMZM2G348956_P01	0.909201	1.01124	1.02788	1.03247
GRMZM2G085246_P02	1.01528	0.984915	1.03739	1.16787
GRMZM2G129860_P01	1.04007	0.982265	1.02924	1.13301
GRMZM2G098815_P03	1.03331	1.12074	1.05983	0.929342
GRMZM2G066602_P01	0.995701	0.940816	1.09315	1.10623
GRMZM2G128016_P01	1.06186	1.03996	1.03414	1.03011
GRMZM2G126170_P02	0.961895	1.02191	1.08593	0.914739
GRMZM5G892787_P01	1.13511	1.08284	1.10693	0.972349
GRMZM2G097674_P01	0.89591	0.956858	1.03409	0.988966
GRMZM2G012964_P01	1.0436	1.10059	0.990266	1.02783
GRMZM2G020574_P07	0.908438	0.983231	0.939544	0.955202
GRMZM2G386229_P01	0.980083	1.0107	1.06532	1.03443
GRMZM2G114172_P01	1.06432	1.10183	1.07247	0.978028
GRMZM2G057186_P01	0.716677	0.780689	0.977048	0.850854
GRMZM2G114706_P01	1.38753	1.47105	1.02348	0.957567
GRMZM2G149946_P03	1.0211	1.15447	1.00371	1.03406
AC205521.3_FGP003	1.25852	1.16809	1.11359	1.01729
GRMZM2G087901_P01	1.24301	1.1322	0.858947	1.07882
GRMZM5G835323_P02	1.16448	1.04092	1.03714	0.935527
GRMZM2G105317_P03	0.977133	0.904582	0.918289	0.968769
GRMZM2G021624_P01	1.00903	1.07642	0.979048	1.12546
GRMZM2G456690_P01	1.11299	1.04318	1.00722	0.984145
GRMZM2G100344_P01	0.98461	1.06548	1.02694	1.03717
GRMZM2G542227_P01	1.1157	0.994881	1.0017	1.06023
GRMZM2G128131_P04	1.03578	1.09815	1.10901	0.970804
GRMZM2G135322_P02	1.0234	1.11504	0.997547	1.01008
GRMZM2G497531_P03	0.850354	0.877685	0.88569	0.890672
GRMZM2G004582_P02	1.11892	0.958673	0.93247	0.94179
GRMZM2G038606_P01	1.16425	0.958324	1.21264	0.927874
GRMZM2G111324_P01	1.15429	1.01283	1.14018	1.00283
GRMZM2G358153_P01	1.01063	1.2258	0.752548	1.01467
GRMZM2G164743_P01	0.952833	0.965769	0.9903	1.01061
GRMZM2G004468_P05	1.0385	0.921166	1.04158	0.982489
GRMZM2G024882_P01	1.02671	1.06814	1.02465	1.07256
GRMZM2G076484_P01	1.06743	1.18801	1.03977	0.981149
GRMZM2G052750_P02	0.95824	1.07095	0.964781	1.01218
GRMZM2G414844_P01	0.867512	0.913537	0.987596	1.06344
GRMZM2G071343_P02	0.977513	1.09147	0.871745	0.920547
AC208201.3_FGP001	1.13776	1.10627	1.13313	1.06748
GRMZM2G384327_P03	0.996245	0.914817	0.929533	1.0276
GRMZM2G008209_P01	0.938395	1.05489	0.940303	1.11905
GRMZM2G074393_P01	1.14378	0.986417	1.28149	0.90383
GRMZM2G074530_P01	1.12689	1.1752	1.1299	0.968859
GRMZM2G068947_P01	0.968533	1.05318	0.956761	0.993565
GRMZM2G132238_P02	0.909748	0.999543	0.852487	1.03416
GRMZM5G803949_P02	0.987669	1.13744	1.01748	1.05033
GRMZM2G381059_P03	1.14408	1.10342	1.10867	0.998807
GRMZM5G861064_P01	0.996885	1.03528	1.02049	1.09556
GRMZM2G062354_P01	1.02679	1.02275	1.00552	1.08264
GRMZM2G093815_P01	1.15227	1.16489	1.02274	0.951664
GRMZM2G384780_P01	0.946166	1.0025	0.953634	0.991595
GRMZM2G031138_P01	0.889886	1.02096	0.796315	1.00006
GRMZM2G426591_P01	0.983118	0.998335	0.967298	1.02659
GRMZM2G105283_P01	1.00743	1.05551	1.01029	1.01978
GRMZM2G351074_P01	0.938502	0.937287	0.961526	1.01262
GRMZM2G047097_P01	1.06593	1.04363	0.985485	1.0311
GRMZM2G311003_P01	1.04326	1.15561	0.997379	0.968418
GRMZM2G010315_P01	1.05093	1.02781	0.977962	0.990097
GRMZM2G002391_P02	0.927043	0.943527	0.964404	1.05555
GRMZM6G101378_P01	0.737646	0.744409	0.814512	0.822483
GRMZM6G191662_P01	1.21432	1.10502	0.993069	0.893972
GRMZM2G042313_P01	0.841119	0.933303	1.05571	1.02499
GRMZM2G065210_P05	1.07386	1.05955	0.975709	0.990402
GRMZM2G005583_P01	1.11241	1.13016	1.07661	1.02886
GRMZM2G050714_P01	1.24467	1.09855	1.16166	0.981493
GRMZM2G439884_P01	1.02707	1.01105	1.09865	1.08377
GRMZM2G061234_P01	1.00446	1.07362	1.05668	0.965462
GRMZM2G077708_P01	1.2496	1.31257	1.13968	1.02186
GRMZM2G088397_P01	1.05525	1.20546	1.05906	0.882205
GRMZM2G005082_P02	1.08143	1.08479	1.14085	1.05696
GRMZM2G048703_P02	1.14523	1.22561	0.968368	0.931626
GRMZM2G044460_P01	0.885839	0.905912	0.968802	1.05967
GRMZM2G361220_P01	1.10748	1.24155	1.10516	1.03257
GRMZM2G100716_P05	0.903077	0.973563	0.95393	0.959384
GRMZM2G010056_P03	1.2304	1.24899	1.09922	1.05801
GRMZM2G100579_P01	1.08817	1.03455	0.93836	0.964865
GRMZM2G061442_P01	1.07452	1.2541	0.956414	0.879587
GRMZM2G118363_P01	0.960461	0.981424	1.00539	0.986455
GRMZM2G158562_P01	1.03378	1.07755	0.957833	1.00402
GRMZM2G142806_P01	1.15828	1.16457	1.01091	0.958179
GRMZM2G014813_P02	1.0299	0.910502	1.00087	1.06711
GRMZM2G013450_P02	1.25598	1.30264	1.04145	0.948969
GRMZM2G144635_P01	1.04338	1.11809	1.06146	0.935704
GRMZM5G893444_P01	1.00389	1.16268	0.938716	0.975995
GRMZM2G066219_P01	1.1316	1.19856	1.12029	1.06235
GRMZM2G136058_P01	1.17311	1.07359	1.02758	1.00557
GRMZM2G077596_P01	1.281	1.27238	1.09456	1.02067
GRMZM2G457534_P01	1.19859	1.11209	1.17579	1.03664
GRMZM2G031501_P05	0.922722	0.671563	0.935753	0.870992
AC209987.4_FGP010	0.77526	0.94316	0.748232	0.952269
AC202974.3_FGP004	1.09763	1.01982	0.989798	0.985128
GRMZM2G304700_P01	0.983764	1.06736	1.0079	0.992556
GRMZM2G174669_P03	1.03415	1.1635	1.07557	0.982178
GRMZM2G302604_P01	1.12208	1.04975	1.03673	1.05729
GRMZM2G458728_P02	0.774669	0.884673	0.746732	0.827356
GRMZM2G385338_P01	1.08527	1.08136	1.11153	0.971757
GRMZM2G094273_P01	0.943712	0.948218	0.990996	0.996271
GRMZM2G060952_P01	1.11245	1.15701	1.08186	0.95667
GRMZM2G304212_P01	0.970907	0.94633	0.880016	1.03693
GRMZM2G093855_P01	0.946989	0.993623	1.1281	1.05174
GRMZM5G829554_P02	1.16873	1.23006	1.04129	1.07595
GRMZM6G220418_P01	1.27237	1.09046	1.01346	1.0501
GRMZM2G090469_P01	0.914858	0.954249	0.963711	0.953565
GRMZM2G157034_P02	0.998632	1.01583	0.980397	1.10958
GRMZM2G071360_P01	1.29153	1.3419	1.23993	1.10124
GRMZM2G017991_P01	1.07257	1.25126	1.02521	1.00719
GRMZM2G175952_P01	1.00714	1.04876	1.01881	1.00248
GRMZM2G046924_P02	0.858298	0.880671	1.02686	1.08974
GRMZM2G010048_P01	1.06897	1.10921	1.17361	1.16079
GRMZM2G469795_P01	1.01213	1.02218	1.06514	0.991986
GRMZM2G156174_P01	1.00789	0.990105	0.959127	1.04288
GRMZM2G063473_P01	1.02491	1.035	1.08336	1.03898
GRMZM2G481163_P01	0.963407	0.989753	0.993274	1.03044
GRMZM2G042173_P01	0.941867	0.932988	0.950838	1.0423
GRMZM2G057026_P01	0.99774	1.01021	1.12189	0.960173
GRMZM2G065076_P02	1.06785	1.11423	1.09716	0.985337
GRMZM2G144367_P01	1.01478	1.16968	0.942007	1.0488
GRMZM2G124239_P01	1.17858	1.34524	1.0873	1.00474
GRMZM2G137724_P01	1.08698	1.14226	0.986796	0.967531
GRMZM2G015067_P01	1.05908	1.12302	1.04775	0.978504
GRMZM2G137891_P02	0.979631	0.943241	1.03095	0.927174
GRMZM2G140342_P01	1.33833	1.25949	1.17212	1.07256
GRMZM2G157332_P01	1.07892	1.17476	1.02577	0.968368
GRMZM2G324705_P01	1.092	1.15361	1.1699	0.991225
GRMZM2G093104_P02	1.01105	1.01596	1.01243	1.05725
GRMZM2G142777_P01	1.07213	1.02315	1.03994	1.08164
GRMZM2G111200_P01	0.916665	0.969413	0.866699	0.727801
GRMZM2G322186_P02	1.02525	1.12737	1.03643	1.00687
GRMZM2G023242_P04	1.27232	1.28654	1.09408	0.899714
GRMZM2G135089_P01	1.08237	1.16379	1.12447	1.07605
GRMZM2G582965_P01	1.07678	0.946817	0.921811	1.00229
GRMZM2G415791_P01	1.00571	0.977234	1.0461	1.03117
GRMZM2G105297_P01	1.11869	0.954075	1.07402	1.03241
GRMZM2G091228_P01	0.994545	0.960422	0.98506	1.03825
GRMZM2G113232_P01	0.922861	1.03908	1.00227	1.02642
GRMZM2G035922_P01	1.08338	1.04615	1.03239	0.992504
GRMZM2G079658_P02	0.991323	0.973728	0.967423	1.06528
GRMZM2G055520_P01	0.99239	0.971616	1.05354	0.981474
GRMZM2G031536_P01	1.26186	1.50766	0.953387	1.04726
GRMZM2G065480_P01	0.987028	1.02749	1.1252	1.0162
GRMZM2G042758_P01	0.903776	1.02796	0.908743	1.01917
GRMZM2G179518_P01	1.04305	1.02093	0.99779	0.983321
GRMZM2G049342_P01	1.10761	1.1315	1.06459	1.00888
GRMZM2G119483_P01	1.17025	1.11993	0.951257	1.06181
GRMZM2G135300_P01	1.04937	1.00027	1.02353	1.04969
GRMZM2G469162_P01	0.928892	0.925152	0.964035	1.08351
GRMZM2G157564_P02	1.30452	1.30141	1.093	1.05518
GRMZM2G012326_P01	1.05905	1.16618	1.13617	0.990204
GRMZM2G040618_P01	1.01286	1.0076	0.984797	0.937464
GRMZM2G143788_P01	1.20163	0.84744	1.09718	0.850142
GRMZM2G127963_P01	1.45358	1.28927	0.975851	1.04228
GRMZM2G126656_P01	1.00924	1.0396	1.00656	0.995186
GRMZM2G129444_P01	1.08983	1.10552	1.04641	0.990567
GRMZM2G026311_P02	1.0452	1.0809	0.979699	0.995739
GRMZM2G067028_P01	0.992761	1.01831	1.05126	0.942302
GRMZM2G416426_P01	1.0242	1.09527	1.02118	1.09206
GRMZM2G171452_P01	1.36877	1.20072	1.06717	0.939507
GRMZM2G087435_P01	0.904625	1.03066	1.00312	1.14427
GRMZM2G060669_P05	1.087	1.136	1.02953	0.984367
GRMZM2G114107_P01	1.07029	0.949087	1.05877	1.01805
GRMZM5G879527_P04	0.864173	0.853809	0.937858	1.14463
GRMZM2G093272_P01	1.37671	1.19043	1.05875	0.958832
GRMZM2G064605_P01	1.077	1.0455	1.18552	1.06064
GRMZM2G050890_P02	0.989254	1.01948	1.03011	1.04258
GRMZM2G178319_P01	1.00926	0.990708	1.08573	1.02316
GRMZM2G049538_P01	1.11922	1.08194	1.14296	1.00654
AC199705.3_FGP008	0.923315	0.93195	0.946311	0.976212
GRMZM2G075336_P02	1.00281	1.00397	0.980731	0.954956
GRMZM2G083374_P01	0.947178	0.987402	0.950622	0.990181
GRMZM2G145666_P01	0.977977	1.04099	0.998287	1.05416
GRMZM2G029400_P01	0.987437	1.07251	1.05386	1.08347
GRMZM2G131026_P01	1.2068	1.32181	1.01666	1.09213
GRMZM2G071768_P02	1.02847	1.0505	0.997962	1.02784
GRMZM2G167836_P02	1.12602	1.12617	0.965023	1.05474
GRMZM2G173636_P02	1.14892	1.11174	1.09889	0.953717
AC190909.3_FGP004	0.940112	1.13153	1.01716	0.971553
GRMZM2G103939_P01	0.980344	1.00779	1.0878	1.16101
GRMZM2G125784_P01	1.14633	1.05433	1.08944	1.00559
GRMZM2G175718_P01	1.0406	0.967192	0.902478	0.956135
GRMZM2G457381_P01	1.15042	1.12941	1.0896	1.0154
GRMZM2G162786_P01	0.828435	0.830271	0.932389	0.830099
GRMZM2G126285_P02	1.14127	1.1806	0.99637	1.02251
GRMZM5G849223_P01	1.16317	1.1608	1.04241	1.03676
GRMZM2G330690_P02	1.00297	1.021	0.990912	1.01391
GRMZM2G035651_P01	1.1603	1.23117	1.19554	1.05789
GRMZM2G049055_P01	1.09709	1.05994	1.02574	1.06239
GRMZM2G071166_P03	0.908549	0.933223	1.01749	0.925472
GRMZM2G409627_P01	1.10775	1.11402	1.04737	1.00008
GRMZM2G172098_P01	1.05797	1.07187	0.995086	1.03214
GRMZM2G043724_P01	1.13078	1.12772	1.05822	0.964186
GRMZM2G043663_P01	1.01664	0.920224	1.012	1.01177
GRMZM2G116670_P02	0.839131	0.91062	1.02913	0.890235
GRMZM2G026523_P01	0.990389	1.03531	1.08436	1.02848
GRMZM2G079908_P01	1.26557	1.04794	0.999126	0.78207
AC217050.4_FGP001	1.02225	1.04667	1.05532	1.01823
GRMZM2G150541_P01	1.06396	1.08716	0.957366	1.01649
GRMZM2G056431_P01	1.10297	1.09166	1.15625	1.00302
GRMZM2G062076_P02	0.977376	0.60309	1.39263	0.750917
GRMZM2G124911_P01	0.964571	1.01206	1.05588	0.987748
GRMZM2G021129_P01	0.989935	1.06395	1.036	1.03345
GRMZM2G473367_P01	1.08179	1.04841	0.994738	1.00998
GRMZM2G439589_P01	0.907557	0.850452	0.88847	1.01963
GRMZM5G807602_P01	0.841346	1.02103	0.931138	1.07665
GRMZM2G174137_P01	1.10426	1.18781	1.04902	1.06771
GRMZM2G091558_P01	1.06236	1.04757	0.915242	0.989405
GRMZM2G120373_P01	0.942593	0.978689	0.99958	1.04122
GRMZM2G123886_P01	0.871474	0.982131	0.97291	1.00133
GRMZM6G514393_P01	0.99121	0.986696	0.933765	1.18647
GRMZM2G091503_P04	0.980935	1.07178	0.998815	0.9998
GRMZM2G412604_P01	1.05202	0.972818	0.777664	0.915934
GRMZM2G078887_P01	1.19719	1.02623	1.00364	1.02992
GRMZM2G371271_P01	0.987843	1.08056	0.884441	0.949913
GRMZM2G070167_P01	0.684117	0.602102	0.764936	0.884175
GRMZM2G069382_P01	0.783037	0.882129	0.779817	0.999159
GRMZM2G416632_P01	1.06519	1.04724	0.941667	0.934963
GRMZM2G084134_P01	0.977005	0.999551	0.999337	1.0134
GRMZM2G012901_P01	0.888638	1.07984	1.03276	1.03209
GRMZM2G047178_P01	1.00977	0.936972	0.933498	1.09166
GRMZM2G074015_P02	1.01471	1.02583	1.03018	1.08807
GRMZM2G342386_P02	1.07368	1.13485	0.970936	0.918974
GRMZM2G088299_P01	1.019	1.06664	1.09789	0.993747
GRMZM2G148115_P01	0.938263	1.04041	0.891745	1.03898
GRMZM2G055141_P01	0.901182	1.01962	1.00904	1.04398
GRMZM2G053210_P01	1.14853	0.939335	1.12844	1.12607
GRMZM2G176662_P01	1.15401	1.23125	1.16294	1.07156
GRMZM2G031846_P01	1.11947	1.08925	1.1369	1.11633
GRMZM2G527891_P01	0.868764	0.969982	0.985629	1.08383
GRMZM2G004087_P01	0.992965	0.948584	1.02267	0.968234
GRMZM2G121123_P01	1.10004	1.05367	1.03645	1.11558
GRMZM2G164378_P01	0.840548	0.813228	0.891005	0.887148
GRMZM2G412150_P01	1.00744	0.992338	0.992912	1.05018
GRMZM5G803318_P03	1.35555	0.847398	1.21871	1.01711
GRMZM2G477694_P01	0.882455	0.900603	0.911035	1.10501
GRMZM2G147726_P01	1.06827	1.32554	1.06847	1.0826
GRMZM2G067789_P01	0.845837	0.942177	0.940888	0.984609
GRMZM2G113453_P01	0.893368	0.975176	0.932679	0.974943
GRMZM2G042807_P01	1.06349	1.01852	1.06034	1.03982
GRMZM2G158197_P01	1.05311	1.02409	0.968641	1.04277
GRMZM2G078656_P01	0.951532	0.960788	0.953886	1.0839
GRMZM2G052416_P01	1.02585	0.905045	1.07129	0.994806
GRMZM2G013283_P01	0.971347	1.09976	1.1029	0.985942
GRMZM2G034043_P01	1.15282	1.15365	1.08728	0.93851
GRMZM5G841914_P01	0.99262	1.05736	1.05669	1.002
GRMZM2G080176_P01	1.11084	1.14991	1.01854	1.00687
GRMZM2G077079_P01	1.25968	1.01633	1.01218	0.962062
GRMZM2G455687_P01	1.02412	0.874313	1.00807	0.989712
GRMZM2G427337_P01	1.05558	1.006	1.10889	0.977314
GRMZM2G101533_P01	0.901786	0.956807	0.98351	1.01016
GRMZM2G412085_P01	0.916955	0.900493	0.989826	1.04885
GRMZM5G832651_P01	0.997528	1.07241	1.05126	0.996118
GRMZM2G019991_P01	1.01011	1.07948	1.08524	1.0949
GRMZM2G088828_P01	1.16051	1.16241	1.01355	1.02258
AC187157.4_FGP002	0.953204	1.05889	0.955632	0.957126
GRMZM2G057075_P01	0.99315	1.08207	0.879234	1.00553
GRMZM2G124974_P02	1.07554	1.10034	0.992427	1.05784
GRMZM2G166701_P01	0.94767	0.931982	0.961512	1.10335
GRMZM2G477694_P03	1.00917	1.03069	1.03154	0.990782
GRMZM2G316191_P01	0.95081	1.07313	1.06239	1.0908
GRMZM2G179633_P01	1.17379	1.17632	0.996708	1.03561
GRMZM2G337616_P01	0.954031	0.96857	0.939449	0.942066
GRMZM5G881296_P01	1.05501	1.05811	1.00853	1.06303
GRMZM2G171987_P01	1.05067	1.11691	0.980077	1.05332
GRMZM2G147623_P02	1.02677	1.00572	1.01047	0.910824
GRMZM2G041028_P01	1.16122	1.04958	1.09486	0.921174
GRMZM2G070305_P01	0.99621	0.961743	0.988568	0.973165
GRMZM2G133652_P01	1.026	1.08314	1.04319	1.01785
GRMZM2G102314_P01	1.00326	1.0413	0.958876	1.08556
GRMZM5G827266_P03	1.17535	1.12944	1.0844	1.10317
GRMZM2G121262_P01	1.23911	1.26781	1.08042	0.950138
GRMZM2G019450_P03	1.09508	1.03362	1.08858	1.05991
GRMZM2G006107_P01	1.04266	1.0382	1.08735	1.03185
GRMZM2G177771_P01	1.0561	1.12966	1.00007	1.09662
GRMZM2G067727_P01	0.94691	0.913208	0.951418	0.993241
GRMZM2G148985_P02	1.09598	0.963514	1.02359	1.05417
GRMZM2G301071_P01	1.01687	0.985106	1.00349	1.06836
AC234159.1_FGP002	0.918446	0.993173	0.913472	1.03883
GRMZM2G012030_P01	1.00977	1.05785	1.08208	0.890961
GRMZM2G314546_P01	1.01752	1.03531	0.999928	1.01837
GRMZM2G126517_P01	1.01995	0.956485	0.972154	1.0424
GRMZM2G169320_P01	1.04827	1.15273	1.03166	1.01332
GRMZM2G405690_P01	1.0081	1.00296	1.05849	1.03003
AC217271.3_FGP002	1.05554	0.939846	1.06288	1.06054
GRMZM6G847892_P02	1.18385	1.25103	1.24528	1.04171
GRMZM2G327635_P01	1.0514	1.13524	1.01536	1.05567
GRMZM2G003853_P01	1.27901	1.21666	1.11266	1.0394
GRMZM2G378604_P01	0.988422	0.936154	1.00193	1.05673
GRMZM2G159221_P01	1.00178	0.994609	0.946095	1.14293
GRMZM2G105364_P01	1.31507	1.06569	1.2924	1.07003
GRMZM2G037280_P01	1.03262	1.01143	1.03928	1.0486
GRMZM5G880508_P01	1.01946	1.00391	0.962233	0.976437
GRMZM2G087137_P02	0.979974	0.964349	1.02837	1.02976
GRMZM2G063431_P01	1.12052	0.497248	0.548956	1.01439
GRMZM2G091302_P03	1.01204	1.00744	0.988392	1.06347
GRMZM2G464000_P02	0.93984	1.01238	1.00395	1.01214
GRMZM2G004959_P01	1.2232	1.18582	1.00998	1.17052
GRMZM2G150256_P01	0.975093	0.905601	0.987159	1.05832
GRMZM2G372475_P01	0.934889	0.991979	1.06479	1.0427
GRMZM2G045421_P01	0.887802	1.038	0.983732	0.998942
GRMZM2G090824_P01	0.926274	0.891675	1.07036	1.00356
GRMZM2G173354_P02	0.986836	1.04006	1.05747	1.00774
GRMZM2G030880_P01	0.856962	0.925319	1.08847	0.88959
GRMZM2G043056_P02	1.00903	0.993422	1.03933	1.09515
GRMZM2G143646_P02	1.12793	1.08512	1.09439	1.13845
GRMZM2G093197_P01	1.01409	1.06196	0.999297	0.975528
GRMZM2G051311_P01	0.957467	1.14183	0.986067	0.962879
GRMZM2G133396_P01	0.94249	1.05674	0.980347	1.07817
GRMZM5G883025_P01	0.990716	1.17874	0.966565	1.03352
GRMZM2G025182_P01	0.954333	1.02125	1.09553	1.07931
GRMZM2G135808_P01	1.0551	0.980623	1.06583	1.03943
GRMZM6G706391_P01	0.783436	1.01769	0.881206	0.965746
GRMZM2G062914_P03	1.17774	1.27944	1.00541	0.99728
GRMZM2G429241_P01	1.04132	1.06718	0.991286	1.06006
GRMZM2G106140_P01	0.877577	1.01764	0.935605	1.05552
GRMZM2G150648_P01	1.01519	0.939751	0.964176	1.0605
AC235546.1_FGP001	1.03501	1.08212	0.980503	1.00732
GRMZM2G128865_P01	1.05869	1.09431	1.01673	1.02537
GRMZM2G140996_P01	1.11404	1.13853	1.06656	0.983155
AC217499.3_FGP003	1.31246	1.02782	1.40142	0.804874
GRMZM2G003897_P01	1.11255	1.28905	0.962528	0.905436
GRMZM2G374084_P01	1.07323	0.963212	1.04408	0.997845
GRMZM2G059299_P01	1.03503	0.981309	0.965828	1.02519
GRMZM2G106412_P01	1.15042	1.18848	1.04522	1.02624
GRMZM2G080503_P01	0.984414	0.982428	0.974624	1.0423
GRMZM2G465833_P01	0.985903	1.02592	0.998897	1.05462
GRMZM2G014170_P01	0.873996	0.790423	0.976663	0.925052
GRMZM2G117989_P02	1.26579	1.07213	0.960219	1.10079
GRMZM2G082823_P01	0.893423	0.79214	0.91797	1.05432
GRMZM2G341253_P01	1.20727	1.01673	1.06818	1.03084
GRMZM2G015861_P02	1.07626	1.16413	1.06735	0.982317
GRMZM2G368799_P01	1.08755	1.00268	0.975988	0.984465
GRMZM2G159849_P01	1.05485	1.05699	0.987283	1.0185
GRMZM2G045688_P05	1.12456	1.05604	1.14144	1.06784
GRMZM2G149211_P01	1.22555	1.04582	1.06303	0.985429
GRMZM2G010136_P01	0.977145	0.901567	0.929646	1.09001
GRMZM2G018689_P01	1.18223	1.0042	1.06058	1.05324
GRMZM2G136178_P01	1.11654	1.11043	0.979533	1.05866
GRMZM2G115176_P01	1.12043	1.26005	1.07522	1.20082
GRMZM2G032711_P01	1.13054	1.15365	1.06353	1.07681
GRMZM2G465226_P01	1.0921	1.01635	0.660256	0.898424
GRMZM2G128012_P01	0.812522	0.909577	0.946096	0.782924
GRMZM2G042245_P01	0.917763	0.917629	0.929188	1.03028
GRMZM2G113794_P01	0.962742	1.09199	0.922111	1.02303
GRMZM2G111907_P01	1.03991	1.04671	0.981398	1.06562
GRMZM2G107116_P03	1.07597	0.950518	1.06494	1.02492
GRMZM2G105438_P01	1.07998	1.03191	0.999031	0.961971
GRMZM2G055527_P01	0.985659	0.950312	1.00028	1.05613
GRMZM2G103884_P01	1.0185	1.02162	0.974718	1.04208
AC152495.1_FGP002	0.843775	0.943609	0.768133	0.968697
GRMZM2G127729_P01	0.912749	1.0553	1.02679	1.05029
GRMZM2G105901_P01	1.12372	1.2253	1.14981	1.12355
GRMZM2G023652_P01	1.31753	1.25028	1.15031	1.14139
GRMZM2G376918_P01	1.18486	1.05113	1.10827	1.08882
GRMZM2G153409_P01	0.997944	0.924436	0.946402	1.04103
GRMZM2G098042_P01	1.10973	1.19797	1.10322	1.04185
GRMZM2G129209_P01	1.17543	1.13363	1.17894	1.09929
GRMZM2G033926_P04	0.901904	0.96912	0.895617	1.02338
GRMZM2G009681_P01	0.872761	0.937588	0.930709	1.00523
GRMZM2G353147_P01	1.04483	1.03537	1.05067	1.07118
GRMZM2G117706_P01	0.940233	1.20453	0.851489	1.09065
GRMZM2G064967_P01	1.01353	0.997698	0.986903	1.02453
GRMZM2G035620_P01	1.13808	1.08287	1.03514	0.976077
GRMZM2G004694_P01	0.995235	0.972955	1.03995	1.08628
GRMZM2G167578_P01	0.989537	1.00745	1.02968	1.02392
GRMZM2G000632_P03	1.03722	1.05677	1.06775	1.03914
GRMZM2G052166_P01	1.05396	1.05006	1.04992	1.06715
GRMZM2G410757_P01	0.877343	0.6877	0.86023	0.878135
GRMZM2G057159_P02	0.832461	1.02345	0.613531	1.02421
GRMZM2G348866_P01	1.01338	0.917415	0.841282	1.04732
GRMZM2G151903_P02	1.07643	0.947453	1.07273	1.03035
GRMZM2G406674_P01	1.02131	1.07292	1.01477	0.998418
AC177850.2_FGP005	1.40135	1.31504	1.18067	1.02708
GRMZM2G114642_P01	1.38984	1.49745	1.14851	0.987161
GRMZM2G014004_P02	1.10764	1.06449	0.982437	1.08522
GRMZM2G022958_P01	0.991393	0.794805	0.876306	0.79557
GRMZM2G049201_P01	1.06507	1.2415	1.00543	1.0393
GRMZM2G320269_P01	0.787458	0.900576	0.889465	1.03254
GRMZM2G074572_P01	1.27637	1.16429	1.052	1.05653
GRMZM2G180422_P01	1.02484	0.96908	0.93379	1.05267
GRMZM2G457789_P01	1.0049	1.01151	0.977036	1.03203
GRMZM2G094017_P01	1.03856	1.0308	0.959037	1.01767
GRMZM5G882351_P01	0.965839	0.867785	1.00353	1.05359
GRMZM2G058105_P01	1.20907	0.952254	1.05084	1.08813
GRMZM2G010754_P01	1.05355	1.16601	1.19913	1.08165
GRMZM2G121840_P01	1.11239	1.0672	0.980501	0.953805
GRMZM2G178875_P01	0.901092	1.0446	0.91142	1.02763
GRMZM2G094655_P01	1.12676	1.07903	0.964261	0.982606
GRMZM2G384528_P01	0.930491	0.879555	0.998696	1.13119
GRMZM2G073571_P03	0.981335	1.02987	1.04665	1.03117
GRMZM2G104125_P01	0.996223	1.15339	0.866006	1.02242
GRMZM2G333448_P01	0.996847	0.952106	0.85372	1.00797
GRMZM2G152889_P01	1.085	1.00043	0.973169	1.03825
GRMZM2G150952_P01	1.00904	0.90595	1.07317	1.01938
GRMZM2G057402_P03	0.902699	0.930811	0.951578	0.984795
GRMZM2G045005_P04	1.06422	1.06387	1.07502	1.11001
GRMZM2G061321_P01	1.05941	1.14423	1.03408	0.985643
GRMZM2G087600_P01	0.979907	0.913724	1.03565	1.06432
GRMZM2G029194_P02	0.930413	0.898195	0.931205	1.07422
AC198518.3_FGP003	1.03485	0.938184	1.05436	1.07513
GRMZM2G154211_P01	1.01779	1.01924	0.88232	0.975179
GRMZM2G048672_P01	1.06502	0.874404	1.00698	0.986407
GRMZM2G040995_P01	1.09903	1.13786	1.03998	1.06715
GRMZM2G050984_P01	0.988543	1.03027	1.02975	1.05956
GRMZM2G005633_P02	1.168	1.20238	1.1502	0.983839
GRMZM2G125266_P01	1.11696	1.11009	1.07015	0.962562
GRMZM2G046070_P03	1.15649	1.01888	1.05544	1.00175
GRMZM2G436328_P01	1.07817	1.08033	1.05576	1.04664
GRMZM2G027437_P01	1.09899	1.00859	1.04512	1.01143
GRMZM2G153920_P01	0.773343	0.934123	0.734285	1.08573
GRMZM2G169333_P07	0.91393	0.992119	0.989768	1.05909
GRMZM2G069203_P01	0.928903	1.07842	1.05697	1.04204
GRMZM2G102560_P02	1.065	1.06847	0.953657	1.1198
GRMZM2G058128_P01	1.01957	0.956303	1.0325	1.0141
AC198353.5_FGP001	0.844746	0.824609	0.752183	0.96923
GRMZM2G150683_P03	0.833574	0.882778	0.852823	0.948378
GRMZM2G060726_P01	1.13057	1.10352	1.10975	0.982827
GRMZM2G007922_P01	1.19842	0.997491	0.99942	1.05739
GRMZM2G114140_P01	1.13297	0.958961	1.13465	1.00023
GRMZM2G170890_P01	1.17337	1.16678	1.03049	0.990462
GRMZM2G062373_P01	1.1761	0.860164	1.07349	0.925157
GRMZM2G045280_P01	1.09042	0.9361	1.02927	1.04618
GRMZM2G039381_P01	1.13177	1.0633	1.25969	1.00635
GRMZM2G137046_P01	1.07671	0.933778	1.15581	1.12025
GRMZM2G168744_P01	1.02357	1.12892	1.20056	1.0637
GRMZM2G154549_P01	1.15359	1.20584	0.972782	0.820279
GRMZM2G156632_P01	1.43165	1.073	1.38546	1.21574
GRMZM2G024389_P02	0.815044	0.95177	0.854967	0.835216
GRMZM2G021299_P01	0.929052	0.903922	1.01529	1.00163
GRMZM2G305007_P01	0.993024	1.01252	0.953999	1.00504
GRMZM2G042592_P01	0.954071	0.988595	0.90498	0.810248
GRMZM2G012229_P01	0.992663	0.905591	0.825614	0.984822
GRMZM2G139689_P01	0.955928	0.919895	1.09772	1.0259
GRMZM2G056270_P01	1.02559	1.10974	1.06586	1.01036
GRMZM2G000749_P01	0.877823	0.987236	0.961888	0.992812
GRMZM2G102183_P02	1.34196	1.04857	1.10859	1.12715
GRMZM2G131165_P01	0.924819	0.961505	0.94442	1.00781
AC233960.1_FGP002	1.03776	1.06103	1.05471	0.946708
GRMZM2G051355_P03	1.11228	1.13492	1.0381	0.980192
GRMZM2G060183_P01	1.06704	1.06019	1.02047	1.05037
GRMZM2G123527_P01	1.09118	1.13403	0.946774	0.975233
GRMZM2G012102_P01	1.23209	1.10734	1.18357	0.970426
GRMZM2G079196_P01	1.27435	1.27129	1.03696	0.795459
GRMZM2G129761_P01	1.43881	1.22025	1.2012	1.02668
GRMZM2G315264_P01	1.08462	1.02221	0.950638	0.981361
GRMZM2G030097_P01	0.876408	0.890191	0.899965	0.937566
GRMZM2G017804_P01	1.01565	0.872981	1.05941	1.06625
GRMZM6G818567_P01	0.901286	1.00643	0.943076	0.949806
GRMZM5G801949_P02	0.705061	0.78815	0.744526	1.02048
GRMZM2G118806_P01	1.03483	1.00172	1.03749	0.963695
GRMZM2G402319_P01	1.00558	1.00883	0.99408	0.98224
GRMZM2G089962_P01	1.0414	1.02047	1.08707	1.0517
GRMZM5G836674_P02	0.940217	1.10383	1.00532	0.992623
GRMZM2G076263_P01	0.963489	0.998971	1.00296	0.865623
GRMZM2G149800_P02	0.990635	1.04237	0.952023	1.03934
AC188023.3_FGP005	1.22277	1.25762	1.03036	0.878077
GRMZM2G358540_P01	0.902431	0.978143	0.997773	1.01334
GRMZM2G158885_P02	1.01118	1.04544	0.921907	1.01009
GRMZM2G010596_P01	1.05039	1.03539	1.06263	1.05855
GRMZM2G027479_P01	1.5258	1.31854	1.67481	1.23146
GRMZM2G408458_P01	0.952582	0.89682	1.17681	0.998419
GRMZM2G341404_P01	1.26713	1.0509	1.09354	0.927835
GRMZM2G382673_P01	1.42371	1.16762	1.06907	0.867187
GRMZM2G178079_P02	1.18778	1.23293	1.00423	0.932981
GRMZM2G329909_P01	0.95498	1.00115	0.990326	1.05653
GRMZM6G676505_P01	0.983714	0.941246	0.962147	0.934653
GRMZM2G109753_P01	1.10439	1.16398	1.05279	0.957357
GRMZM2G032071_P01	0.955366	0.977911	0.974273	1.08026
GRMZM2G117189_P02	0.952106	0.986423	1.03214	0.951774
GRMZM2G060070_P01	0.945871	0.926416	1.12572	1.05762
GRMZM2G094595_P03	1.3009	1.20424	1.04381	0.924162
GRMZM2G179737_P02	0.998677	1.07357	0.930251	0.969587
GRMZM2G314679_P04	1.25942	1.43403	1.06464	0.895465
GRMZM2G015603_P01	1.59516	1.48602	1.11421	1.10024
GRMZM2G111491_P01	0.925837	1.02274	0.89225	0.980763
GRMZM2G147279_P01	0.729435	0.738609	0.765486	0.819328
GRMZM2G132461_P02	1.32976	1.2002	1.12761	0.858499
GRMZM2G464328_P01	1.14871	1.3317	1.07132	0.866881
GRMZM2G017355_P01	1.18663	1.3135	1.1391	1.01359
GRMZM2G031930_P01	0.996847	0.954983	0.883542	1.04378
GRMZM2G438239_P01	1.1854	1.13759	1.09784	1.01694
GRMZM2G003165_P01	1.11556	1.06694	1.05168	1.04602
GRMZM2G097434_P02	1.03893	0.985313	1.0244	0.938277
GRMZM2G086269_P01	1.0673	1.03307	1.0342	0.944152
GRMZM5G847615_P01	1.17408	1.20221	1.01979	0.86621
GRMZM5G861791_P01	1.07026	1.22915	1.07702	1.01899
GRMZM2G424873_P02	0.971411	0.94626	0.9266	1.01634
GRMZM2G013255_P01	0.869703	0.931904	0.946395	1.02695
GRMZM2G041831_P01	1.00585	1.12638	1.0655	0.995131
GRMZM2G113205_P01	1.03454	0.90232	1.12686	0.850574
AC217358.3_FGP010	0.892924	0.9753	0.94958	0.952867
GRMZM2G180172_P02	0.993471	1.08491	0.979588	1.05214
GRMZM2G134182_P01	0.889874	0.95874	0.931932	1.00168
GRMZM2G050730_P01	1.29311	1.11093	0.999851	1.06252
GRMZM2G424595_P01	1.00025	1.12366	1.22224	1.27587
GRMZM2G142111_P01	1.24744	1.08177	1.10026	1.01859
AC208337.2_FGP003	1.27222	1.09845	0.843116	1.11331
GRMZM2G113418_P01	1.04833	1.06214	1.06689	0.993139
GRMZM2G049798_P01	0.925806	0.920797	0.868043	1.07065
GRMZM2G175818_P02	1.09995	1.17744	1.03125	0.980978
GRMZM2G481604_P01	1.21167	1.28464	1.08427	0.916262
GRMZM2G174671_P04	1.09974	1.03601	0.997525	0.948857
GRMZM2G021687_P01	0.962609	0.743384	0.971574	0.82697
GRMZM2G157263_P01	1.06432	1.05605	0.967404	0.997661
GRMZM2G142740_P01	1.13237	1.19395	1.02161	1.07129
GRMZM2G063533_P01	0.799468	0.87836	0.844256	1.01677
GRMZM2G057056_P01	1.00116	0.99427	0.995511	1.04455
GRMZM2G032821_P02	0.989578	1.0569	1.00993	0.965754
GRMZM2G107571_P01	1.19766	1.21633	1.05113	0.975014
GRMZM2G101130_P01	1.01551	0.910957	0.927047	1.05173
GRMZM2G473310_P01	0.981323	0.989212	0.991951	0.922585
GRMZM2G103345_P02	0.88564	0.93585	1.00238	0.905299
AC217358.3_FGP011	1.04542	1.11256	0.983957	1.06215
GRMZM2G063806_P01	1.26598	1.31452	1.14797	1.03846
GRMZM2G066051_P01	1.23323	1.23133	1.10978	0.91477
GRMZM2G066469_P01	0.996499	0.905471	1.01344	1.02436
GRMZM2G097896_P01	0.962558	1.01712	0.935683	1.00632
GRMZM2G073310_P01	0.855906	0.998425	0.906854	0.90154
GRMZM2G387394_P01	1.05733	1.19472	1.18824	1.05151
GRMZM2G137786_P01	1.0058	1.15402	1.0089	0.929137
GRMZM2G165681_P01	1.11089	1.14795	1.02067	0.88304
GRMZM5G853854_P04	1.06861	1.04338	0.929916	1.01814
GRMZM2G102808_P03	1.00508	1.20604	0.993613	0.987629
GRMZM2G177947_P01	1.17461	1.14696	1.0701	1.03867
GRMZM2G416308_P01	1.14344	1.21543	1.1318	0.977254
GRMZM2G080521_P01	1.02439	1.03363	1.03729	1.01081
GRMZM2G034764_P01	0.815345	0.711938	0.916674	1.02452
GRMZM2G108123_P01	1.09138	1.26881	0.833895	1.12238
GRMZM2G133885_P01	0.925431	1.03743	0.944461	1.01623
GRMZM2G173809_P01	1.06787	1.23313	1.33667	1.16493
GRMZM2G173536_P01	1.00091	0.915471	0.835904	1.07085
GRMZM2G474883_P01	1.26015	1.18738	1.00905	0.929176
GRMZM2G140082_P02	0.917786	1.01137	0.902102	0.973386
GRMZM2G163988_P01	0.950685	0.941103	1.19104	0.897077
GRMZM2G067992_P01	1.1049	1.06368	1.06201	0.976717
GRMZM5G855860_P02	0.933212	1.04311	1.02605	1.00457
GRMZM2G134985_P01	0.914435	1.04392	0.985467	0.967874
GRMZM2G105005_P01	1.26867	1.16119	1.08836	0.89476
GRMZM2G152477_P01	0.964774	0.984802	1.0164	1.05634
GRMZM2G045371_P02	1.01505	1.01985	1.03616	1.04422
GRMZM2G157010_P01	0.908574	1.03483	0.975113	1.00881
GRMZM2G060011_P01	1.13179	1.12446	1.11956	0.991287
GRMZM2G054210_P01	1.11551	1.27444	1.08619	1.01869
GRMZM2G480516_P01	1.18189	1.12395	1.04658	0.96659
GRMZM2G459874_P02	1.0635	0.991876	1.0271	1.00262
GRMZM2G428168_P01	1.20545	1.34338	1.10567	0.997781
GRMZM2G157379_P01	0.868858	0.951061	1.02795	1.03578
GRMZM2G103662_P02	0.963599	0.937899	1.00392	1.01256
GRMZM2G128651_P01	1.24984	1.18691	1.1407	1.09719
GRMZM2G172274_P01	1.40495	0.963629	1.51339	1.02187
GRMZM2G116434_P01	0.99043	1.07295	0.994382	1.0456
GRMZM2G031496_P01	0.853549	0.840085	0.915505	1.00233
GRMZM2G001803_P01	0.997578	1.04261	0.956852	0.96416
GRMZM2G033491_P01	1.17708	1.10301	1.13696	1.00983
GRMZM2G312997_P01	1.10315	1.01944	1.16217	0.920003
GRMZM2G095261_P01	0.981987	1.03083	0.895621	1.06461
GRMZM2G117811_P01	0.956889	0.954213	0.92695	1.04273
GRMZM2G023711_P01	0.933755	1.06071	0.961194	0.881859
GRMZM2G029396_P01	1.17663	1.339	1.0322	0.94836
GRMZM2G087850_P04	1.25225	1.14947	1.10871	1.04209
GRMZM2G002754_P01	0.978101	1.03877	0.978524	1.03626
GRMZM2G049416_P01	1.06255	1.09738	1.13177	1.07763
GRMZM2G132021_P03	1.01174	1.17786	1.03886	1.09175
GRMZM2G118265_P01	1.02472	1.15962	1.05268	0.97035
GRMZM2G143627_P02	1.36278	1.21258	1.15532	0.896278
GRMZM2G466281_P03	1.05631	1.05585	1.09554	1.08346
GRMZM2G170516_P01	1.00491	0.971813	0.993228	1.02289
GRMZM2G046900_P01	1.14064	1.18859	1.02231	1.00636
GRMZM2G012174_P01	1.10794	1.05017	1.06498	0.966798
GRMZM2G036206_P01	0.932316	1.02038	1.00878	0.969257
GRMZM2G018586_P01	1.06719	0.886319	0.896836	0.956442
GRMZM2G467907_P01	1.12255	1.1135	1.09447	1.02831
GRMZM2G052373_P01	1.00848	1.16415	1.09552	0.948166
GRMZM2G174048_P01	0.93729	0.891781	0.99313	0.968567
GRMZM2G082198_P01	1.09467	1.03813	1.05009	0.931971
GRMZM2G116846_P01	0.982882	1.06216	1.04116	1.00094
GRMZM2G051174_P01	1.07097	1.00191	1.01538	1.01081
GRMZM2G123896_P04	0.911959	0.46035	1.01651	0.764067
GRMZM2G053977_P01	1.03261	1.00886	0.975339	1.02032
GRMZM2G116858_P02	1.15391	1.27966	1.10517	1.02758
GRMZM2G166718_P02	1.22606	1.23145	1.06999	1.03079
GRMZM2G023110_P01	1.14195	1.07941	1.0455	1.04545
GRMZM2G110198_P04	0.988878	1.00371	0.950154	0.983671
GRMZM2G361652_P02	0.969889	0.951207	0.912135	0.989724
GRMZM2G168299_P02	0.961387	1.03148	1.03178	1.00119
GRMZM2G025870_P01	1.00998	1.07223	0.901584	0.970661
GRMZM2G177026_P01	1.10368	1.1103	1.00404	0.993945
GRMZM2G129431_P01	1.07463	0.980791	0.959233	1.0298
GRMZM2G082642_P06	1.0345	1.00508	0.994902	0.991452
GRMZM2G008864_P01	1.08354	0.898352	1.04435	1.13292
GRMZM2G362368_P01	0.989938	0.948235	0.975054	0.986664
GRMZM2G000623_P02	1.04934	1.06119	0.987661	0.908616
GRMZM2G018579_P01	0.898788	0.798174	0.968994	1.04652
GRMZM2G313101_P01	0.987476	0.990845	1.01674	1.05932
GRMZM2G104658_P07	0.891612	0.9657	1.02416	0.983729
GRMZM2G153393_P01	1.03461	0.935821	1.00296	0.991636
GRMZM2G055467_P01	0.981799	0.946796	0.885995	0.962855
GRMZM2G103771_P01	1.08626	1.08257	1.09076	1.05381
GRMZM2G094581_P01	0.997548	1.02294	1.00407	1.02111
GRMZM2G168337_P01	0.949498	1.07813	0.970107	1.05254
GRMZM2G442057_P01	1.1658	1.30318	1.07705	1.01966
GRMZM2G061910_P01	0.987586	0.938762	0.986188	1.07662
GRMZM2G098674_P01	1.14781	1.14445	1.03561	1.05277
GRMZM2G027886_P01	1.14397	1.05848	0.985313	1.02966
GRMZM2G159475_P01	0.99546	1.04287	0.984267	0.990187
GRMZM2G115615_P01	1.34521	1.42891	1.18305	0.93569
GRMZM2G033680_P01	1.05687	1.23977	1.06187	0.870928
GRMZM2G383088_P01	0.85743	0.902543	0.906139	0.942356
GRMZM2G165290_P01	1.21612	1.29582	1.12448	1.02017
GRMZM2G012224_P01	1.21018	1.23329	1.10504	1.09203
GRMZM2G102580_P01	0.974146	1.16148	0.900966	0.940749
GRMZM2G411668_P01	0.883215	0.929488	1.0486	0.994206
GRMZM2G439950_P02	1.32257	1.22734	1.08733	0.942401
GRMZM2G003794_P03	1.13523	1.132	1.20603	0.911602
GRMZM5G898755_P01	1.8097	2.20084	1.50892	1.59317
GRMZM2G058021_P01	1.02651	1.01043	0.973813	1.03129
GRMZM2G100043_P02	1.17763	1.09188	1.11874	1.00688
GRMZM2G024391_P01	0.742595	0.833568	0.817204	0.905695
GRMZM2G014076_P01	1.28888	1.2525	1.20794	0.99539
GRMZM2G301803_P03	0.96428	0.991594	1.05759	0.95834
GRMZM2G148411_P01	1.04998	1.08954	1.00638	1.0314
GRMZM2G109731_P01	1.16017	1.20217	1.03338	0.912742
GRMZM2G472693_P02	0.783387	0.739321	0.848486	0.988061
GRMZM2G098214_P01	1.11197	1.13008	1.00099	1.03453
GRMZM2G006661_P01	1.14343	1.16651	1.03551	0.961894
GRMZM2G056103_P02	0.995532	1.00071	1.02228	1.00971
GRMZM2G115621_P01	1.09066	1.109	1.05866	0.999588
GRMZM5G830695_P02	0.999031	0.979908	0.995168	1.0593
GRMZM2G019411_P01	0.942753	0.975556	0.900246	1.04887
GRMZM2G115013_P01	0.97572	1.05354	0.999213	1.0174
GRMZM2G104505_P01	1.17672	1.13279	1.02762	1.04933
GRMZM2G149553_P01	1.02458	1.0537	1.05976	1.04247
GRMZM2G017299_P01	0.932414	0.99335	0.992213	1.02448
GRMZM2G102231_P02	1.11895	1.03574	1.05651	0.949765
GRMZM2G405178_P02	1.17783	1.0851	1.05865	1.02863
GRMZM2G019177_P03	1.00216	0.989735	0.965418	0.964908
GRMZM2G078468_P01	1.026	0.968438	0.999177	1.04184
GRMZM5G806387_P01	1.16299	1.22719	1.0924	0.99616
GRMZM2G085254_P01	0.894682	0.921209	1.00826	0.986372
GRMZM2G168096_P01	1.05654	1.08182	1.00934	0.932869
GRMZM2G001363_P01	1.05783	1.12994	1.01842	0.919843
GRMZM2G009253_P01	1.18905	1.23871	1.13877	0.925138
GRMZM2G137139_P01	1.15789	1.16292	1.09089	1.00173
GRMZM2G144501_P01	0.664719	0.958523	1.06784	0.995205
GRMZM2G089021_P01	0.987433	1.01397	1.02549	1.01693
GRMZM2G420743_P01	1.10857	0.925423	1.01267	1.01173
GRMZM2G002921_P01	1.24321	1.20376	1.08702	0.898034
GRMZM2G082633_P01	0.942405	0.965576	0.947085	0.999613
GRMZM2G426242_P01	0.997964	0.885916	1.05786	1.12144
AC194970.5_FGP004	1.01141	1.09408	0.933083	1.02286
GRMZM2G174236_P01	0.998278	1.06101	0.992327	1.08905
GRMZM2G149286_P01	0.967558	1.02227	1.07097	0.976504
GRMZM2G044627_P01	1.24949	1.2363	1.13294	1.09323
GRMZM2G124820_P01	1.09594	1.23174	1.07832	0.929609
GRMZM2G158083_P02	0.909193	1.04295	0.994288	0.995606
GRMZM5G802566_P06	1.19039	1.31064	1.13431	0.928744
GRMZM2G369912_P01	1.12983	1.05494	1.01599	1.00819
GRMZM2G446171_P01	0.997549	0.953871	1.02211	0.954374
GRMZM2G126338_P01	1.00179	1.05186	0.869226	1.06431
GRMZM2G153615_P01	1.01787	1.03951	0.953249	1.09774
GRMZM2G324886_P01	1.32627	1.18193	1.12236	0.99645
GRMZM2G058872_P01	1.13359	1.23323	1.22183	0.902163
GRMZM2G107588_P01	1.1892	1.37437	1.04121	0.915675
GRMZM2G113156_P03	1.01786	1.07421	1.20465	1.04991
GRMZM2G153769_P01	1.04971	1.25869	1.0463	0.875487
GRMZM2G376727_P04	1.18101	1.04809	1.09017	1.11781
GRMZM2G002616_P01	1.11236	1.16608	1.04458	1.02048
GRMZM5G823484_P01	1.12509	1.27609	1.05626	1.00662
GRMZM2G429842_P02	1.08806	0.99499	1.18556	0.999096
GRMZM2G077531_P01	0.87587	0.909985	0.923715	0.98857
GRMZM2G078723_P01	1.11988	1.11861	1.01842	0.993578
GRMZM2G156162_P06	0.935333	0.968058	0.952685	0.93642
GRMZM2G444808_P01	1.06617	0.990444	1.0289	1.07122
GRMZM2G126397_P01	1.13544	1.10261	1.12799	1.10156
GRMZM2G113365_P01	0.960347	0.966497	0.969756	1.07494
GRMZM2G372684_P02	0.993262	1.02819	1.00152	0.98994
GRMZM2G073521_P01	0.812831	0.872277	0.96288	0.997465
GRMZM2G137984_P01	1.15426	1.24749	1.06667	1.03249
GRMZM2G006416_P01	0.979677	1.07988	1.0384	1.03228
GRMZM2G008607_P01	1.00602	0.995366	0.951339	1.04064
GRMZM2G004715_P01	1.00765	1.04575	1.01232	0.98884
GRMZM2G159160_P01	0.867506	0.898455	0.945789	0.976767
GRMZM2G342509_P01	0.943799	1.00532	1.01758	1.03518
GRMZM2G007630_P01	0.948381	0.982507	1.00828	1.10326
GRMZM2G020295_P02	1.1294	1.00486	1.03396	0.930446
GRMZM2G096037_P02	0.849504	0.860371	0.913311	0.983479
GRMZM2G449274_P01	0.999155	0.978156	1.00727	1.05273
GRMZM2G110929_P01	1.01845	0.907592	0.937715	1.04691
GRMZM2G474658_P03	0.986837	1.00074	1.03591	1.0972
GRMZM2G048117_P01	1.10698	1.15635	1.11155	1.03524
GRMZM2G168301_P01	1.08664	1.17285	1.00527	0.970487
GRMZM2G112352_P02	1.01958	1.07768	0.993295	0.959096
GRMZM2G052078_P02	1.24545	1.30035	1.1213	1.10463
GRMZM2G126468_P01	1.06721	1.10642	1.0897	1.02081
GRMZM2G438938_P01	1.00387	1.0487	1.06397	1.07254
GRMZM2G045706_P01	0.918756	0.843246	0.909975	1.03305
GRMZM2G026309_P01	1.17335	1.09637	1.09835	1.00411
GRMZM2G155077_P01	1.03972	1.03896	1.09657	0.948667
GRMZM2G018275_P01	0.908323	0.87639	0.975289	0.980462
GRMZM2G446872_P01	1.09888	1.0803	1.0376	1.03735
GRMZM2G104166_P02	1.08786	1.06905	1.09353	1.01824
GRMZM5G800101_P01	0.80546	0.879852	0.915238	0.952133
GRMZM2G136306_P01	0.956688	1.02087	0.90753	0.732557
GRMZM2G122481_P01	1.08651	1.10168	0.988477	1.02982
GRMZM2G045854_P01	1.02439	0.893068	1.0329	1.00087
GRMZM2G149224_P01	1.20314	1.25441	0.999895	1.01197
GRMZM2G102196_P01	1.12986	1.25994	1.22095	0.879482
GRMZM2G044531_P01	1.17405	1.1235	1.05568	0.919435
GRMZM2G004128_P01	0.961839	0.920365	0.998536	1.06252
GRMZM2G406119_P01	0.939778	0.999812	1.05737	1.06795
GRMZM2G146887_P02	1.12334	1.07479	1.00186	1.06025
GRMZM2G139941_P01	0.994053	1.0079	1.16573	0.964598
GRMZM2G040247_P01	0.999706	1.0376	1.02949	1.06452
GRMZM2G458283_P01	0.940417	1.02222	0.980709	1.04001
GRMZM2G164308_P03	0.944504	0.902253	1.00878	1.07391
GRMZM2G169486_P01	1.11144	0.912486	1.03313	1.10847
GRMZM2G002786_P01	1.28765	1.22869	1.30602	0.904798
GRMZM2G141858_P01	0.841188	0.925086	0.838702	1.03706
GRMZM2G394968_P01	0.955417	1.01629	0.958911	0.918928
GRMZM2G021694_P01	0.9118	0.96165	0.873179	1.03313
GRMZM2G124143_P03	1.14243	1.21734	1.13969	1.09432
GRMZM2G151015_P02	0.988528	1.10706	1.01927	1.05906
GRMZM2G013378_P01	1.04989	1.04282	1.09038	1.05179
GRMZM2G153704_P01	1.02358	1.16324	1.04942	1.03574
GRMZM2G134270_P01	0.984147	1.0325	1.04001	0.990782
GRMZM2G117614_P01	0.889806	0.984271	0.863747	0.983585
GRMZM2G091362_P01	1.15136	1.12391	1.14746	0.994231
GRMZM2G163277_P01	1.13401	1.09088	1.2396	1.02119
GRMZM2G348675_P02	1.04373	1.13029	1.04863	1.02371
GRMZM2G016836_P01	1.32736	1.16292	1.1628	1.03975
GRMZM2G150209_P02	1.12867	1.14638	1.03541	1.00506
GRMZM2G040559_P01	1.08556	1.16835	0.990785	1.02185
GRMZM2G123714_P01	1.33631	1.37185	1.04895	1.02255
GRMZM2G084928_P02	0.993744	1.04992	1.09611	1.13615
GRMZM2G159759_P01	1.12183	1.07038	1.10062	1.0585
GRMZM2G128444_P02	1.04797	1.08037	1.16047	0.922802
GRMZM2G109589_P01	1.0352	1.07139	1.0026	1.05151
GRMZM2G360455_P01	0.926806	1.02417	0.944708	1.07134
GRMZM2G139621_P01	1.10505	1.23431	1.1526	1.09132
GRMZM2G173119_P01	1.02498	0.957261	1.06046	0.995903
GRMZM2G102349_P01	0.907073	1.0714	0.874802	0.83304
GRMZM2G020034_P01	1.12584	1.09572	1.08973	0.99384
GRMZM2G120539_P01	1.017	0.980824	1.0656	1.08857
GRMZM2G087146_P03	1.02862	1.06777	1.03624	0.980227
GRMZM2G032218_P02	0.988583	0.95975	0.986856	0.950012
GRMZM2G114584_P03	1.1301	1.06268	1.03186	1.07346
GRMZM2G041050_P02	0.922359	0.94014	1.00312	1.00888
GRMZM2G077844_P01	0.942529	0.875947	1.00385	0.996652
GRMZM2G140817_P01	1.25263	1.27865	1.11437	1.03507
GRMZM2G090034_P02	1.01124	1.12757	0.965504	0.993412
GRMZM2G115750_P01	1.08161	1.15146	1.00403	0.964541
GRMZM2G005788_P01	1.13656	1.09679	1.19008	1.08715
GRMZM2G042171_P01	0.958487	0.994123	0.975806	1.01247
GRMZM5G858556_P01	0.864929	1.00274	0.960648	1.15763
GRMZM2G000397_P01	1.08852	1.23329	0.953062	0.971766
GRMZM2G133012_P01	0.964009	0.973848	0.937454	1.04119
GRMZM2G168953_P01	1.10072	0.988121	1.09255	0.984621
GRMZM2G090500_P01	1.44001	1.35598	1.14405	1.05191
GRMZM2G051879_P05	0.968515	0.950464	0.940766	1.08059
GRMZM2G180654_P02	1.40355	1.37855	0.99147	0.770489
GRMZM2G398527_P01	1.10598	1.10878	1.03456	1.08772
GRMZM2G455115_P01	1.01257	1.02179	1.04406	1.04963
GRMZM2G129540_P01	1.23499	1.06994	1.07732	1.0255
GRMZM2G076399_P01	1.13394	1.08664	1.0095	0.994338
GRMZM2G549512_P01	0.990844	0.921626	0.92515	1.03852
GRMZM2G058345_P01	0.969222	1.03232	0.994136	1.03534
GRMZM2G066426_P01	0.926429	1.02104	0.988232	1.06534
GRMZM2G130379_P02	0.916699	0.978307	0.95031	0.884857
GRMZM2G133844_P01	0.852175	0.813434	0.908061	0.929797
GRMZM2G009189_P01	1.04089	1.0865	1.09944	1.05206
GRMZM2G003307_P02	0.925433	1.00914	0.982879	1.04802
GRMZM2G438622_P05	1.04665	1.0688	0.990909	1.06637
GRMZM2G091151_P01	1.09788	1.07313	1.11957	0.990413
GRMZM2G351248_P01	1.0742	0.96122	1.04123	1.0856
GRMZM2G067417_P02	1.14389	0.982416	1.11672	0.894077
GRMZM2G158629_P02	1.04218	1.07332	0.98984	0.993928
GRMZM5G898305_P01	1.07932	1.12311	1.05994	0.984916
GRMZM2G014720_P01	1.05362	1.08842	1.00537	0.97973
GRMZM2G028552_P01	1.11364	1.05833	1.02154	1.04349
GRMZM2G061446_P01	1.0725	1.19964	1.16407	0.997624
GRMZM2G035517_P01	1.07342	1.01357	1.0568	1.02055
GRMZM2G004511_P01	1.21668	0.973984	0.987269	1.03696
GRMZM2G176688_P01	1.08861	1.15147	1.07566	0.964227
GRMZM5G884242_P04	1.3019	0.859525	1.299	0.999513
GRMZM2G156818_P01	1.05739	1.05643	1.03774	1.03473
GRMZM2G025281_P02	0.985707	0.937038	1.03433	1.12385
GRMZM2G088162_P01	1.08452	1.07904	1.08362	1.09706
GRMZM2G150262_P01	0.978119	1.01152	1.09181	1.12018
GRMZM2G359102_P01	0.974469	1.03324	0.994281	1.0445
GRMZM6G748721_P01	0.922319	1.02001	0.937117	0.950808
GRMZM2G039419_P01	1.25623	1.39858	1.11961	0.992578
GRMZM2G106531_P01	0.9734	1.02075	0.971045	0.991653
GRMZM2G052908_P01	1.06756	1.04446	0.995742	0.973631
GRMZM2G132130_P01	1.02302	1.06587	1.04531	0.984527
GRMZM2G127297_P01	0.930768	0.878894	0.836516	0.981539
GRMZM5G856966_P01	1.41458	0.996653	1.18633	1.06857
GRMZM5G850904_P01	1.0723	1.29067	1.08872	1.05086
GRMZM2G152438_P01	0.989806	1.00773	0.997413	1.04171
GRMZM2G021406_P01	1.04197	1.06482	0.994969	1.05331
GRMZM2G024267_P01	0.860557	0.899232	0.93122	1.02938
GRMZM2G140339_P01	0.97043	0.98323	1.0187	1.01904
GRMZM2G139193_P01	0.836944	0.870237	0.989094	1.1004
GRMZM2G123540_P01	1.11581	1.17416	1.04787	1.04041
GRMZM2G049155_P01	0.984702	0.895842	0.975965	1.01814
GRMZM2G009346_P01	1.24716	1.16818	1.0352	1.05335
GRMZM2G326677_P01	1.0221	1.03643	1.04568	1.03283
GRMZM2G071304_P01	1.10206	1.04471	1.0293	1.07585
GRMZM2G053839_P01	1.08229	1.17945	1.13412	1.04221
GRMZM2G057983_P01	0.992587	0.935159	1.04682	0.989245
GRMZM2G394450_P01	1.06026	0.949222	1.01039	1.10945
GRMZM2G152975_P01	1.16871	1.10557	1.22059	1.05201
GRMZM2G402092_P01	0.905038	0.879797	0.88013	0.910597
GRMZM2G055992_P01	1.13643	1.04383	1.05172	1.00343
GRMZM2G083309_P01	0.99542	1.01017	0.989527	1.02058
GRMZM2G159404_P01	0.994667	0.962704	0.9932	1.16649
GRMZM2G126552_P01	1.06808	1.02377	1.03231	1.02583
GRMZM2G006468_P03	0.859697	1.05299	1.00738	1.04201
GRMZM2G077662_P02	1.19395	1.25762	1.05266	0.95538
GRMZM2G069816_P01	1.13745	1.18109	1.11154	1.00583
GRMZM2G137077_P01	0.858197	0.855133	0.948769	1.06768
GRMZM2G074781_P01	1.08553	1.08844	1.11612	1.05588
GRMZM2G005256_P02	1.11269	1.20313	0.946511	1.01838
GRMZM2G140737_P01	1.04867	1.08904	0.990096	1.08371
GRMZM2G164018_P01	1.08526	1.17272	1.0386	0.958661
GRMZM2G075744_P01	1.08653	1.03615	1.13837	1.10665
GRMZM2G073934_P01	1.02632	1.05594	0.959587	1.0474
GRMZM2G045135_P01	1.02519	1.06447	0.99051	1.03556
GRMZM2G080041_P01	1.14194	0.930281	1.07661	1.1304
GRMZM2G102681_P01	0.916196	0.901123	0.954439	1.03417
GRMZM2G180471_P01	0.922966	0.876473	0.860905	1.04902
GRMZM2G140970_P01	1.01742	1.02784	1.03498	0.969645
GRMZM2G353024_P01	1.073	1.05335	1.03901	0.935671
GRMZM2G397759_P01	1.32945	1.34233	1.0708	0.891532
GRMZM2G020653_P01	1.00655	1.02005	0.997707	0.987189
EF517601.1_FGP015	0.995516	0.954704	0.9592	1.06329
GRMZM2G472231_P01	1.07413	1.06505	1.02431	0.99614
GRMZM2G054537_P01	1.07818	1.02304	1.11599	0.99299
GRMZM2G151738_P01	0.848433	0.856288	0.955875	1.08107
GRMZM2G007928_P01	1.05111	0.830736	1.2536	0.931091
GRMZM2G127665_P01	1.05279	0.963873	1.02769	1.00745
GRMZM2G062591_P02	0.922547	0.954763	1.04954	1.11753
GRMZM2G146190_P01	1.05683	1.00087	1.07356	1.02661
GRMZM2G169458_P01	1.84303	1.80575	1.2674	1.04395
GRMZM2G172357_P01	1.08061	0.994795	0.982362	0.933649
GRMZM2G002130_P01	1.10206	1.13815	0.997811	1.14057
GRMZM2G146020_P02	1.22601	0.947781	1.02695	1.00092
GRMZM2G121269_P01	1.07107	1.11404	1.00912	1.12809
GRMZM2G054896_P01	0.850417	0.937903	0.955834	1.11523
GRMZM2G160994_P01	1.07749	1.14768	1.07428	1.00687
GRMZM2G362413_P01	1.13616	1.17561	1.09746	1.02476
GRMZM2G017351_P01	1.00577	0.900674	0.904864	0.87788
GRMZM2G102786_P01	0.942841	0.941728	0.916487	1.00174
GRMZM2G059353_P01	1.15585	1.16984	0.996353	1.0401
GRMZM2G013814_P01	1.14084	1.16469	1.1588	1.14177
AC205703.4_FGP010	1.04659	1.02283	0.972828	1.05972
GRMZM2G112640_P01	1.01258	1.08996	1.05158	1.02419
GRMZM2G181568_P01	1.01084	1.08839	0.964469	0.909871
GRMZM6G828652_P01	0.843782	0.903218	0.892107	0.989157
GRMZM2G444034_P01	1.12396	1.20336	1.06944	1.03886
GRMZM2G124047_P02	0.865933	0.923611	0.798607	1.04071
GRMZM2G038512_P02	0.990156	1.00974	1.06088	1.06829
[truncated: 4,635 more rows]

## Sheet: MEbrown
GO enrichment analysis of “MEbrown" module.
GO.ID	GO.Name	GO.Category	P.Value	Nr.Test	Nr.Reference	Non.Annot.Test	Non.Annot.Reference	SeqTest
GO:0050896	response to stimulus	BIOLOGICAL_PROCESS	0.00595222	80	925	317	5309	GRMZM2G058305_P01, GRMZM2G163129_P01, GRMZM2G055992_P01, GRMZM2G041159_P01, AC191009.3_FGP004, GRMZM2G124758_P02, GRMZM2G116133_P07, GRMZM2G018586_P01, GRMZM2G115646_P01, GRMZM2G048067_P01, AC202974.3_FGP004, GRMZM2G051943_P01, GRMZM2G075283_P01, GRMZM2G069651_P01, AC199526.5_FGP002, GRMZM2G120814_P01, GRMZM2G092586_P01, GRMZM2G369912_P01, GRMZM2G060824_P01, GRMZM2G012631_P01, GRMZM2G312839_P01, …
GO:0097367	carbohydrate derivative binding	MOLECULAR_FUNCTION	0.0408041	73	906	324	5328	GRMZM2G058305_P01, GRMZM2G147811_P01, GRMZM2G129155_P01, GRMZM2G124758_P02, GRMZM5G808624_P01, GRMZM2G134176_P01, GRMZM2G444560_P01, GRMZM2G051943_P01, GRMZM2G014136_P01, GRMZM2G099666_P01, GRMZM2G069651_P01, AC199526.5_FGP002, GRMZM2G060824_P01, GRMZM2G012631_P01, GRMZM2G312839_P01, GRMZM2G071871_P02, AC217975.3_FGP001, GRMZM2G132069_P01, GRMZM2G144008_P01, GRMZM2G028139_P01, GRMZM2G053987_P04, …
GO:0006950	response to stress	BIOLOGICAL_PROCESS	0.0180803	49	544	348	5690	GRMZM2G058305_P01, GRMZM2G163129_P01, GRMZM2G041159_P01, AC191009.3_FGP004, GRMZM2G116133_P07, GRMZM2G018586_P01, GRMZM2G051943_P01, GRMZM2G075283_P01, GRMZM2G069651_P01, AC199526.5_FGP002, GRMZM2G120814_P01, GRMZM2G060824_P01, GRMZM2G012631_P01, GRMZM2G312839_P01, GRMZM2G174444_P01, GRMZM2G094712_P01, GRMZM2G053987_P04, GRMZM2G117989_P02, GRMZM5G853854_P04, GRMZM2G023023_P01, GRMZM2G149704_P02, …
GO:0051716	cellular response to stimulus	BIOLOGICAL_PROCESS	0.00877598	45	470	352	5764	GRMZM2G049127_P01, GRMZM2G058305_P01, AC197246.3_FGP001, GRMZM2G158489_P01, AC191009.3_FGP004, GRMZM5G836471_P05, GRMZM2G124758_P02, GRMZM2G116133_P07, GRMZM2G126834_P02, GRMZM2G111510_P01, AC194914.3_FGP002, GRMZM2G049055_P01, GRMZM2G016890_P01, GRMZM2G048067_P01, GRMZM2G075283_P01, GRMZM2G013114_P01, GRMZM2G138861_P04, GRMZM2G120814_P01, GRMZM2G017351_P01, GRMZM2G092586_P01, GRMZM2G369912_P01, …
GO:0016772	transferase activity, transferring phosphorus-containing groups	MOLECULAR_FUNCTION	0.00849744	39	393	358	5841	GRMZM2G074572_P01, GRMZM2G058305_P01, GRMZM2G147811_P01, GRMZM2G133749_P02, GRMZM5G808624_P01, GRMZM2G111510_P01, GRMZM2G023110_P01, GRMZM2G052434_P01, GRMZM2G045970_P01, GRMZM2G060464_P02, GRMZM2G013114_P01, GRMZM2G033930_P01, GRMZM2G138861_P04, GRMZM2G025356_P01, GRMZM2G017351_P01, GRMZM2G051270_P01, GRMZM2G180930_P01, GRMZM2G312839_P01, GRMZM2G026881_P01, GRMZM2G160842_P02, AC217975.3_FGP001, …
GO:0007154	cell communication	BIOLOGICAL_PROCESS	0.00668574	28	253	369	5981	GRMZM2G049127_P01, GRMZM2G058305_P01, AC197246.3_FGP001, GRMZM5G836471_P05, GRMZM2G124758_P02, GRMZM2G126834_P02, AC194914.3_FGP002, GRMZM2G049055_P01, GRMZM2G016890_P01, GRMZM2G048067_P01, GRMZM2G075283_P01, GRMZM2G013114_P01, GRMZM2G138861_P04, GRMZM2G017351_P01, GRMZM2G092586_P01, GRMZM2G369912_P01, GRMZM2G060824_P01, GRMZM2G312839_P01, AC217975.3_FGP001, GRMZM2G144008_P01, GRMZM2G362088_P02, …
GO:0023052	signaling	BIOLOGICAL_PROCESS	0.0102455	26	233	371	6001	GRMZM2G049127_P01, GRMZM2G058305_P01, AC197246.3_FGP001, GRMZM5G836471_P05, GRMZM2G124758_P02, GRMZM2G126834_P02, AC194914.3_FGP002, GRMZM2G049055_P01, GRMZM2G016890_P01, GRMZM2G048067_P01, GRMZM2G075283_P01, GRMZM2G013114_P01, GRMZM2G138861_P04, GRMZM2G017351_P01, GRMZM2G092586_P01, GRMZM2G369912_P01, AC217975.3_FGP001, GRMZM2G144008_P01, GRMZM2G362088_P02, GRMZM2G053987_P04, GRMZM5G853854_P04, …
GO:0007165	signal transduction	BIOLOGICAL_PROCESS	0.0139546	25	228	372	6006	GRMZM2G049127_P01, GRMZM2G058305_P01, AC197246.3_FGP001, GRMZM5G836471_P05, GRMZM2G124758_P02, GRMZM2G126834_P02, AC194914.3_FGP002, GRMZM2G049055_P01, GRMZM2G016890_P01, GRMZM2G048067_P01, GRMZM2G075283_P01, GRMZM2G013114_P01, GRMZM2G138861_P04, GRMZM2G017351_P01, GRMZM2G092586_P01, GRMZM2G369912_P01, AC217975.3_FGP001, GRMZM2G144008_P01, GRMZM2G362088_P02, GRMZM2G053987_P04, GRMZM5G853854_P04, …
GO:0016773	phosphotransferase activity, alcohol group as acceptor	MOLECULAR_FUNCTION	0.0399055	25	256	372	5978	GRMZM2G074572_P01, GRMZM2G058305_P01, GRMZM2G147811_P01, GRMZM2G133749_P02, GRMZM5G808624_P01, GRMZM2G111510_P01, GRMZM2G023110_P01, GRMZM2G052434_P01, GRMZM2G013114_P01, GRMZM2G033930_P01, GRMZM2G138861_P04, GRMZM2G017351_P01, GRMZM2G051270_P01, AC217975.3_FGP001, GRMZM2G132069_P01, AC217401.3_FGP003, GRMZM2G053987_P04, GRMZM2G127050_P01, GRMZM5G884972_P02, GRMZM2G089819_P01, GRMZM2G368799_P01, …
GO:0051704	multi-organism process	BIOLOGICAL_PROCESS	0.00629261	20	160	377	6074	GRMZM2G053987_P04, GRMZM2G117989_P02, GRMZM2G143725_P01, GRMZM2G069722_P01, GRMZM5G853854_P04, GRMZM2G163129_P01, GRMZM2G026147_P03, GRMZM2G041159_P01, GRMZM2G098153_P01, GRMZM2G156861_P02, GRMZM2G023023_P01, GRMZM2G079499_P01, GRMZM2G149704_P02, GRMZM2G138861_P04, GRMZM2G045192_P01, GRMZM2G060824_P01, GRMZM2G087901_P01, GRMZM2G582965_P01, GRMZM2G341729_P01, GRMZM2G387890_P01
GO:0009605	response to external stimulus	BIOLOGICAL_PROCESS	0.0103694	20	164	377	6070	GRMZM2G053987_P04, GRMZM2G117989_P02, GRMZM2G069722_P01, GRMZM5G853854_P04, GRMZM2G414387_P06, GRMZM2G163129_P01, GRMZM2G041159_P01, GRMZM2G156861_P02, GRMZM2G023023_P01, GRMZM2G058595_P01, GRMZM2G079499_P01, GRMZM2G149704_P02, GRMZM2G013114_P01, GRMZM2G138861_P04, GRMZM2G045192_P01, GRMZM2G060824_P01, GRMZM2G582965_P01, GRMZM2G312839_P01, GRMZM2G341729_P01, GRMZM2G387890_P01
GO:0004672	protein kinase activity	MOLECULAR_FUNCTION	0.0297741	19	174	378	6060	GRMZM2G053987_P04, GRMZM2G127050_P01, GRMZM2G074572_P01, GRMZM2G058305_P01, GRMZM2G147811_P01, GRMZM5G884972_P02, GRMZM2G089819_P01, GRMZM2G133749_P02, GRMZM2G023110_P01, GRMZM2G052434_P01, GRMZM2G046729_P01, GRMZM2G013114_P01, GRMZM2G138861_P04, GRMZM2G326472_P03, GRMZM2G017351_P01, AC217975.3_FGP001, GRMZM2G051984_P02, AC217401.3_FGP003, GRMZM2G321239_P01
GO:0006952	defense response	BIOLOGICAL_PROCESS	0.0202709	18	153	379	6081	GRMZM2G053987_P04, GRMZM2G117989_P02, GRMZM2G074572_P01, GRMZM2G069722_P01, GRMZM5G853854_P04, GRMZM2G163129_P01, GRMZM2G119705_P01, GRMZM2G158489_P01, GRMZM2G041159_P01, GRMZM2G156861_P02, GRMZM2G023023_P01, GRMZM2G051943_P01, GRMZM2G075283_P01, GRMZM2G149704_P02, GRMZM2G138861_P04, GRMZM2G045192_P01, GRMZM2G582965_P01, GRMZM2G387890_P01
GO:0035556	intracellular signal transduction	BIOLOGICAL_PROCESS	0.0108691	15	109	382	6125	GRMZM2G362088_P02, GRMZM2G053987_P04, GRMZM2G058305_P01, AC197246.3_FGP001, GRMZM5G836471_P05, GRMZM2G124758_P02, GRMZM2G126834_P02, GRMZM2G049055_P01, GRMZM2G048067_P01, GRMZM2G138861_P04, GRMZM2G017351_P01, GRMZM2G092586_P01, GRMZM2G387890_P01, GRMZM2G144008_P01, GRMZM2G321239_P01
GO:0009607	response to biotic stimulus	BIOLOGICAL_PROCESS	0.0390188	14	119	383	6115	GRMZM2G117989_P02, GRMZM2G069722_P01, GRMZM5G853854_P04, GRMZM2G163129_P01, GRMZM2G041159_P01, GRMZM2G156861_P02, GRMZM2G023023_P01, GRMZM2G075283_P01, GRMZM2G149704_P02, GRMZM2G138861_P04, GRMZM2G045192_P01, GRMZM2G582965_P01, GRMZM2G341729_P01, GRMZM2G387890_P01
GO:0005506	iron ion binding	MOLECULAR_FUNCTION	0.00205405	13	75	384	6159	GRMZM2G302074_P01, GRMZM2G069722_P01, GRMZM2G172826_P01, GRMZM2G414387_P06, GRMZM2G456690_P01, GRMZM2G085661_P01, GRMZM2G040728_P01, GRMZM2G167549_P03, GRMZM2G020761_P01, GRMZM2G013082_P01, GRMZM2G056247_P01, GRMZM2G156861_P02, AC197699.3_FGP003
GO:0098542	defense response to other organism	BIOLOGICAL_PROCESS	0.0369077	12	96	385	6138	GRMZM2G117989_P02, GRMZM2G023023_P01, GRMZM2G069722_P01, GRMZM5G853854_P04, GRMZM2G163129_P01, GRMZM2G149704_P02, GRMZM2G138861_P04, GRMZM2G045192_P01, GRMZM2G582965_P01, GRMZM2G041159_P01, GRMZM2G387890_P01, GRMZM2G156861_P02
GO:0020037	heme binding	MOLECULAR_FUNCTION	0.0346815	12	94	385	6140	GRMZM2G302074_P01, GRMZM2G069722_P01, GRMZM2G172826_P01, GRMZM2G085661_P01, GRMZM2G040728_P01, GRMZM2G054300_P04, GRMZM5G882228_P02, GRMZM2G167549_P03, GRMZM2G020761_P01, GRMZM2G013082_P01, GRMZM2G056247_P01, GRMZM2G137839_P01
GO:0004497	monooxygenase activity	MOLECULAR_FUNCTION	0.0108451	9	53	388	6181	GRMZM2G302074_P01, GRMZM2G069722_P01, GRMZM2G172826_P01, GRMZM2G085661_P01, GRMZM2G040728_P01, GRMZM2G167549_P03, GRMZM2G020761_P01, GRMZM2G013082_P01, GRMZM2G056247_P01
GO:0016779	nucleotidyltransferase activity	MOLECULAR_FUNCTION	0.012006	9	54	388	6180	GRMZM6G798998_P02, GRMZM2G034326_P01, GRMZM2G045970_P01, GRMZM2G032003_P05, GRMZM2G028132_P01, GRMZM2G025356_P01, GRMZM2G051270_P01, GRMZM2G312839_P01, GRMZM2G160842_P02
GO:0016705	oxidoreductase activity, acting on paired donors, with incorporation or reduction of molecular oxygen	MOLECULAR_FUNCTION	0.0358498	9	61	388	6173	GRMZM2G302074_P01, GRMZM2G069722_P01, GRMZM2G172826_P01, GRMZM2G085661_P01, GRMZM2G040728_P01, GRMZM2G167549_P03, GRMZM2G020761_P01, GRMZM2G013082_P01, GRMZM2G056247_P01
GO:2000113	negative regulation of cellular macromolecule biosynthetic process	BIOLOGICAL_PROCESS	0.0146364	7	37	390	6197	GRMZM2G143725_P01, GRMZM2G138800_P01, GRMZM2G119705_P01, GRMZM2G582965_P01, GRMZM2G116133_P07, GRMZM2G168269_P02, GRMZM2G091143_P01
GO:0010558	negative regulation of macromolecule biosynthetic process	BIOLOGICAL_PROCESS	0.0184592	7	39	390	6195	GRMZM2G143725_P01, GRMZM2G138800_P01, GRMZM2G119705_P01, GRMZM2G582965_P01, GRMZM2G116133_P07, GRMZM2G168269_P02, GRMZM2G091143_P01
GO:0080134	regulation of response to stress	BIOLOGICAL_PROCESS	0.0184592	7	39	390	6195	GRMZM2G053987_P04, GRMZM2G074572_P01, GRMZM5G853854_P04, GRMZM2G138861_P04, GRMZM2G158489_P01, GRMZM2G312839_P01, GRMZM2G387890_P01
GO:0031327	negative regulation of cellular biosynthetic process	BIOLOGICAL_PROCESS	0.0281055	7	43	390	6191	GRMZM2G143725_P01, GRMZM2G138800_P01, GRMZM2G119705_P01, GRMZM2G582965_P01, GRMZM2G116133_P07, GRMZM2G168269_P02, GRMZM2G091143_P01
GO:0009890	negative regulation of biosynthetic process	BIOLOGICAL_PROCESS	0.0281055	7	43	390	6191	GRMZM2G143725_P01, GRMZM2G138800_P01, GRMZM2G119705_P01, GRMZM2G582965_P01, GRMZM2G116133_P07, GRMZM2G168269_P02, GRMZM2G091143_P01
GO:0007264	small GTPase mediated signal transduction	BIOLOGICAL_PROCESS	0.0340159	7	45	390	6189	GRMZM2G362088_P02, AC197246.3_FGP001, GRMZM2G092586_P01, GRMZM5G836471_P05, GRMZM2G124758_P02, GRMZM2G144008_P01, GRMZM2G049055_P01
GO:0009060	aerobic respiration	BIOLOGICAL_PROCESS	0.0340159	7	45	390	6189	GRMZM2G010823_P01, GRMZM2G076524_P02, GRMZM2G122943_P01, GRMZM2G146965_P01, GRMZM2G105438_P01, GRMZM2G077415_P01, GRMZM2G094712_P01
GO:0009738	abscisic acid-activated signaling pathway	BIOLOGICAL_PROCESS	0.0142787	6	28	391	6206	GRMZM2G140811_P01, GRMZM2G058305_P01, GRMZM2G075283_P01, GRMZM2G138861_P04, GRMZM2G321239_P01, AC194914.3_FGP002
GO:0071215	cellular response to abscisic acid stimulus	BIOLOGICAL_PROCESS	0.0142787	6	28	391	6206	GRMZM2G140811_P01, GRMZM2G058305_P01, GRMZM2G075283_P01, GRMZM2G138861_P04, GRMZM2G321239_P01, AC194914.3_FGP002
GO:0097306	cellular response to alcohol	BIOLOGICAL_PROCESS	0.0142787	6	28	391	6206	GRMZM2G140811_P01, GRMZM2G058305_P01, GRMZM2G075283_P01, GRMZM2G138861_P04, GRMZM2G321239_P01, AC194914.3_FGP002
GO:0006099	tricarboxylic acid cycle	BIOLOGICAL_PROCESS	0.0301864	6	34	391	6200	GRMZM2G010823_P01, GRMZM2G076524_P02, GRMZM2G146965_P01, GRMZM2G105438_P01, GRMZM2G077415_P01, GRMZM2G094712_P01
GO:0048284	organelle fusion	BIOLOGICAL_PROCESS	0.0336448	6	35	391	6199	GRMZM2G104505_P01, GRMZM2G414540_P01, GRMZM2G473367_P01, GRMZM2G167836_P02, GRMZM5G894156_P01, GRMZM2G384338_P01
GO:0071396	cellular response to lipid	BIOLOGICAL_PROCESS	0.0336448	6	35	391	6199	GRMZM2G140811_P01, GRMZM2G058305_P01, GRMZM2G075283_P01, GRMZM2G138861_P04, GRMZM2G321239_P01, AC194914.3_FGP002
GO:0006101	citrate metabolic process	BIOLOGICAL_PROCESS	0.0373498	6	36	391	6198	GRMZM2G010823_P01, GRMZM2G076524_P02, GRMZM2G146965_P01, GRMZM2G105438_P01, GRMZM2G077415_P01, GRMZM2G094712_P01
GO:0042742	defense response to bacterium	BIOLOGICAL_PROCESS	0.041306	6	37	391	6197	GRMZM2G117989_P02, GRMZM2G023023_P01, GRMZM5G853854_P04, GRMZM2G163129_P01, GRMZM2G149704_P02, GRMZM2G138861_P04
GO:0016042	lipid catabolic process	BIOLOGICAL_PROCESS	0.0499858	6	39	391	6195	GRMZM2G014136_P01, GRMZM2G140811_P01, GRMZM2G099666_P01, GRMZM2G154523_P01, GRMZM2G133943_P01, GRMZM2G094712_P01
GO:0009617	response to bacterium	BIOLOGICAL_PROCESS	0.0499858	6	39	391	6195	GRMZM2G117989_P02, GRMZM2G023023_P01, GRMZM5G853854_P04, GRMZM2G163129_P01, GRMZM2G149704_P02, GRMZM2G138861_P04
GO:0072350	tricarboxylic acid metabolic process	BIOLOGICAL_PROCESS	0.0499858	6	39	391	6195	GRMZM2G010823_P01, GRMZM2G076524_P02, GRMZM2G146965_P01, GRMZM2G105438_P01, GRMZM2G077415_P01, GRMZM2G094712_P01
GO:0009856	pollination	BIOLOGICAL_PROCESS	0.0147283	5	20	392	6214	GRMZM2G087901_P01, GRMZM2G053987_P04, GRMZM2G098153_P01, GRMZM2G079499_P01, GRMZM2G060824_P01
GO:0044706	multi-multicellular organism process	BIOLOGICAL_PROCESS	0.0147283	5	20	392	6214	GRMZM2G087901_P01, GRMZM2G053987_P04, GRMZM2G098153_P01, GRMZM2G079499_P01, GRMZM2G060824_P01
GO:0005351	carbohydrate:proton symporter activity	MOLECULAR_FUNCTION	0.00686801	5	16	392	6218	GRMZM2G064437_P01, GRMZM2G087901_P01, GRMZM2G302604_P01, GRMZM2G060183_P01, GRMZM5G862325_P01
GO:0005402	carbohydrate:cation symporter activity	MOLECULAR_FUNCTION	0.00686801	5	16	392	6218	GRMZM2G064437_P01, GRMZM2G087901_P01, GRMZM2G302604_P01, GRMZM2G060183_P01, GRMZM5G862325_P01
GO:0015295	solute:proton symporter activity	MOLECULAR_FUNCTION	0.00686801	5	16	392	6218	GRMZM2G064437_P01, GRMZM2G087901_P01, GRMZM2G302604_P01, GRMZM2G060183_P01, GRMZM5G862325_P01
GO:0015294	solute:cation symporter activity	MOLECULAR_FUNCTION	0.0102908	5	18	392	6216	GRMZM2G064437_P01, GRMZM2G087901_P01, GRMZM2G302604_P01, GRMZM2G060183_P01, GRMZM5G862325_P01
GO:0015293	symporter activity	MOLECULAR_FUNCTION	0.0147283	5	20	392	6214	GRMZM2G064437_P01, GRMZM2G087901_P01, GRMZM2G302604_P01, GRMZM2G060183_P01, GRMZM5G862325_P01
GO:0016709	oxidoreductase activity, acting on paired donors, with incorporation or reduction of molecular oxygen, NAD(P)H as one donor, and incorporation of one atom of oxygen	MOLECULAR_FUNCTION	0.0270768	5	24	392	6210	GRMZM2G302074_P01, GRMZM2G069722_P01, GRMZM2G172826_P01, GRMZM2G167549_P03, GRMZM2G085661_P01
GO:0010118	stomatal movement	BIOLOGICAL_PROCESS	0.00125288	4	5	393	6229	GRMZM2G140811_P01, GRMZM2G058305_P01, GRMZM2G013114_P01, GRMZM2G138861_P04
GO:1904659	glucose transmembrane transport	BIOLOGICAL_PROCESS	0.023937	4	15	393	6219	GRMZM2G064437_P01, GRMZM2G302604_P01, GRMZM2G060183_P01, GRMZM5G862325_P01
GO:0046323	glucose import	BIOLOGICAL_PROCESS	0.023937	4	15	393	6219	GRMZM2G064437_P01, GRMZM2G302604_P01, GRMZM2G060183_P01, GRMZM5G862325_P01
GO:0008645	hexose transmembrane transport	BIOLOGICAL_PROCESS	0.023937	4	15	393	6219	GRMZM2G064437_P01, GRMZM2G302604_P01, GRMZM2G060183_P01, GRMZM5G862325_P01
GO:0015749	monosaccharide transmembrane transport	BIOLOGICAL_PROCESS	0.0336476	4	17	393	6217	GRMZM2G064437_P01, GRMZM2G302604_P01, GRMZM2G060183_P01, GRMZM5G862325_P01
GO:0031667	response to nutrient levels	BIOLOGICAL_PROCESS	0.0392448	4	18	393	6216	GRMZM2G312839_P01, GRMZM2G414387_P06, GRMZM2G013114_P01, GRMZM2G060824_P01
GO:0048584	positive regulation of response to stimulus	BIOLOGICAL_PROCESS	0.0453404	4	19	393	6215	GRMZM2G053987_P04, GRMZM2G312839_P01, GRMZM2G140811_P01, GRMZM5G853854_P04
GO:0005484	SNAP receptor activity	MOLECULAR_FUNCTION	0.0161531	4	13	393	6221	GRMZM2G104505_P01, GRMZM2G414540_P01, GRMZM2G167836_P02, GRMZM5G894156_P01
GO:0005355	glucose transmembrane transporter activity	MOLECULAR_FUNCTION	0.023937	4	15	393	6219	GRMZM2G064437_P01, GRMZM2G302604_P01, GRMZM2G060183_P01, GRMZM5G862325_P01
GO:0015149	hexose transmembrane transporter activity	MOLECULAR_FUNCTION	0.023937	4	15	393	6219	GRMZM2G064437_P01, GRMZM2G302604_P01, GRMZM2G060183_P01, GRMZM5G862325_P01
GO:0015145	monosaccharide transmembrane transporter activity	MOLECULAR_FUNCTION	0.0336476	4	17	393	6217	GRMZM2G064437_P01, GRMZM2G302604_P01, GRMZM2G060183_P01, GRMZM5G862325_P01
GO:0051119	sugar transmembrane transporter activity	MOLECULAR_FUNCTION	0.0453404	4	19	393	6215	GRMZM2G064437_P01, GRMZM2G302604_P01, GRMZM2G060183_P01, GRMZM5G862325_P01
GO:0006360	transcription by RNA polymerase I	BIOLOGICAL_PROCESS	0.00081432	3	1	394	6233	GRMZM2G034326_P01, GRMZM2G028132_P01, GRMZM2G025356_P01
GO:0000725	recombinational repair	BIOLOGICAL_PROCESS	0.0037182	3	3	394	6231	GRMZM2G120814_P01, AC191009.3_FGP004, GRMZM2G016602_P03
GO:0000724	double-strand break repair via homologous recombination	BIOLOGICAL_PROCESS	0.0037182	3	3	394	6231	GRMZM2G120814_P01, AC191009.3_FGP004, GRMZM2G016602_P03
GO:0010119	regulation of stomatal movement	BIOLOGICAL_PROCESS	0.0037182	3	3	394	6231	GRMZM2G058305_P01, GRMZM2G138861_P04, GRMZM2G140811_P01
GO:0010647	positive regulation of cell communication	BIOLOGICAL_PROCESS	0.00621939	3	4	394	6230	GRMZM2G053987_P04, GRMZM2G312839_P01, GRMZM2G140811_P01
GO:0009846	pollen germination	BIOLOGICAL_PROCESS	0.00621939	3	4	394	6230	GRMZM2G087901_P01, GRMZM2G060824_P01, GRMZM2G098153_P01
GO:0006302	double-strand break repair	BIOLOGICAL_PROCESS	0.00951276	3	5	394	6229	GRMZM2G120814_P01, AC191009.3_FGP004, GRMZM2G016602_P03
GO:0006743	ubiquinone metabolic process	BIOLOGICAL_PROCESS	0.0186367	3	7	394	6227	GRMZM2G041159_P01, GRMZM2G065210_P05, GRMZM2G028552_P01
GO:0006744	ubiquinone biosynthetic process	BIOLOGICAL_PROCESS	0.0186367	3	7	394	6227	GRMZM2G041159_P01, GRMZM2G065210_P05, GRMZM2G028552_P01
GO:0016482	cytosolic transport	BIOLOGICAL_PROCESS	0.0245077	3	8	394	6226	GRMZM2G362088_P02, GRMZM2G068489_P01, GRMZM5G894156_P01
GO:0000160	phosphorelay signal transduction system	BIOLOGICAL_PROCESS	0.0245077	3	8	394	6226	GRMZM2G362088_P02, GRMZM2G126834_P02, GRMZM2G387890_P01
GO:0009267	cellular response to starvation	BIOLOGICAL_PROCESS	0.0388726	3	10	394	6224	GRMZM2G414387_P06, GRMZM2G312839_P01, GRMZM2G060824_P01
GO:0007346	regulation of mitotic cell cycle	BIOLOGICAL_PROCESS	0.0473378	3	11	394	6223	GRMZM5G899300_P01, GRMZM2G149108_P01, GRMZM6G007923_P01
GO:0001054	RNA polymerase I activity	MOLECULAR_FUNCTION	0.00081432	3	1	394	6233	GRMZM2G034326_P01, GRMZM2G028132_P01, GRMZM2G025356_P01
GO:0016783	sulfurtransferase activity	MOLECULAR_FUNCTION	0.0186367	3	7	394	6227	GRMZM2G165966_P01, GRMZM2G160842_P02, GRMZM2G071714_P01
GO:0070566	adenylyltransferase activity	MOLECULAR_FUNCTION	0.0312563	3	9	394	6225	GRMZM2G051270_P01, GRMZM2G312839_P01, GRMZM2G160842_P02
GO:0016782	transferase activity, transferring sulfur-containing groups	MOLECULAR_FUNCTION	0.0473378	3	11	394	6223	GRMZM2G165966_P01, GRMZM2G160842_P02, GRMZM2G071714_P01
GO:0003899	DNA-directed 5-3 RNA polymerase activity	MOLECULAR_FUNCTION	0.0473378	3	11	394	6223	GRMZM2G034326_P01, GRMZM2G028132_P01, GRMZM2G025356_P01
GO:0009736	cytokinin-activated signaling pathway	BIOLOGICAL_PROCESS	0.0456685	2	4	395	6230	GRMZM2G016890_P01, GRMZM2G126834_P02
GO:0009723	response to ethylene	BIOLOGICAL_PROCESS	0.0239113	2	5	236	6388	GRMZM2G107839_P01, GRMZM2G119657_P01
GO:0071368	cellular response to cytokinin stimulus	BIOLOGICAL_PROCESS	0.0456685	2	4	395	6230	GRMZM2G016890_P01, GRMZM2G126834_P02
GO:0045165	cell fate commitment	BIOLOGICAL_PROCESS	0.00357596	2	0	395	6234	GRMZM2G058292_P01, GRMZM2G060824_P01
GO:0043545	molybdopterin cofactor metabolic process	BIOLOGICAL_PROCESS	0.0103017	2	1	395	6233	GRMZM2G165966_P01, GRMZM2G160842_P02
GO:0051189	prosthetic group metabolic process	BIOLOGICAL_PROCESS	0.0103017	2	1	395	6233	GRMZM2G165966_P01, GRMZM2G160842_P02
GO:0006777	Mo-molybdopterin cofactor biosynthetic process	BIOLOGICAL_PROCESS	0.0103017	2	1	395	6233	GRMZM2G165966_P01, GRMZM2G160842_P02
GO:2000104	negative regulation of DNA-dependent DNA replication	BIOLOGICAL_PROCESS	0.0103017	2	1	395	6233	GRMZM2G116133_P07, GRMZM2G143725_P01
GO:0019720	Mo-molybdopterin cofactor metabolic process	BIOLOGICAL_PROCESS	0.0103017	2	1	395	6233	GRMZM2G165966_P01, GRMZM2G160842_P02
GO:0006383	transcription by RNA polymerase III	BIOLOGICAL_PROCESS	0.0103017	2	1	395	6233	GRMZM2G034326_P01, GRMZM2G025356_P01
GO:0008156	negative regulation of DNA replication	BIOLOGICAL_PROCESS	0.0103017	2	1	395	6233	GRMZM2G116133_P07, GRMZM2G143725_P01
GO:0018198	peptidyl-cysteine modification	BIOLOGICAL_PROCESS	0.0103017	2	1	395	6233	GRMZM2G041159_P01, GRMZM2G160842_P02
GO:0046460	neutral lipid biosynthetic process	BIOLOGICAL_PROCESS	0.0197891	2	2	395	6232	GRMZM2G122943_P01, GRMZM2G138861_P04
GO:0046463	acylglycerol biosynthetic process	BIOLOGICAL_PROCESS	0.0197891	2	2	395	6232	GRMZM2G122943_P01, GRMZM2G138861_P04
GO:0019432	triglyceride biosynthetic process	BIOLOGICAL_PROCESS	0.0197891	2	2	395	6232	GRMZM2G122943_P01, GRMZM2G138861_P04
GO:0018065	protein-cofactor linkage	BIOLOGICAL_PROCESS	0.0197891	2	2	395	6232	GRMZM2G041159_P01, GRMZM2G071714_P01
GO:0042330	taxis	BIOLOGICAL_PROCESS	0.031685	2	3	395	6231	GRMZM2G079499_P01, GRMZM2G053987_P04
GO:0010948	negative regulation of cell cycle process	BIOLOGICAL_PROCESS	0.031685	2	3	395	6231	GRMZM2G143725_P01, GRMZM5G899300_P01
GO:0050918	positive chemotaxis	BIOLOGICAL_PROCESS	0.031685	2	3	395	6231	GRMZM2G079499_P01, GRMZM2G053987_P04
GO:0006935	chemotaxis	BIOLOGICAL_PROCESS	0.031685	2	3	395	6231	GRMZM2G079499_P01, GRMZM2G053987_P04
GO:0010183	pollen tube guidance	BIOLOGICAL_PROCESS	0.031685	2	3	395	6231	GRMZM2G079499_P01, GRMZM2G053987_P04
GO:0016036	cellular response to phosphate starvation	BIOLOGICAL_PROCESS	0.0456685	2	4	395	6230	GRMZM2G312839_P01, GRMZM2G060824_P01
GO:0044003	modification by symbiont of host morphology or physiology	BIOLOGICAL_PROCESS	0.0456685	2	4	395	6230	GRMZM5G853854_P04, GRMZM2G582965_P01
GO:0023056	positive regulation of signaling	BIOLOGICAL_PROCESS	0.0456685	2	4	395	6230	GRMZM2G053987_P04, GRMZM2G140811_P01
GO:0051053	negative regulation of DNA metabolic process	BIOLOGICAL_PROCESS	0.0456685	2	4	395	6230	GRMZM2G116133_P07, GRMZM2G143725_P01
GO:0045786	negative regulation of cell cycle	BIOLOGICAL_PROCESS	0.0456685	2	4	395	6230	GRMZM2G143725_P01, GRMZM5G899300_P01
GO:0032412	regulation of ion transmembrane transporter activity	BIOLOGICAL_PROCESS	0.0456685	2	4	395	6230	GRMZM2G058305_P01, GRMZM2G138861_P04
GO:0010359	regulation of anion channel activity	BIOLOGICAL_PROCESS	0.0456685	2	4	395	6230	GRMZM2G058305_P01, GRMZM2G138861_P04
GO:0009967	positive regulation of signal transduction	BIOLOGICAL_PROCESS	0.0456685	2	4	395	6230	GRMZM2G053987_P04, GRMZM2G140811_P01
GO:0071804	cellular potassium ion transport	BIOLOGICAL_PROCESS	0.0456685	2	4	395	6230	GRMZM2G013114_P01, AC233953.1_FGP005
GO:0071805	potassium ion transmembrane transport	BIOLOGICAL_PROCESS	0.0456685	2	4	395	6230	GRMZM2G013114_P01, AC233953.1_FGP005
GO:0022898	regulation of transmembrane transporter activity	BIOLOGICAL_PROCESS	0.0456685	2	4	395	6230	GRMZM2G058305_P01, GRMZM2G138861_P04
GO:0032409	regulation of transporter activity	BIOLOGICAL_PROCESS	0.0456685	2	4	395	6230	GRMZM2G058305_P01, GRMZM2G138861_P04
GO:0008425	2-polyprenyl-6-methoxy-1,4-benzoquinone methyltransferase activity	MOLECULAR_FUNCTION	0.00357596	2	0	395	6234	GRMZM2G065210_P05, GRMZM2G028552_P01
GO:0030580	quinone cofactor methyltransferase activity	MOLECULAR_FUNCTION	0.00357596	2	0	395	6234	GRMZM2G065210_P05, GRMZM2G028552_P01
GO:0001056	RNA polymerase III activity	MOLECULAR_FUNCTION	0.0103017	2	1	395	6233	GRMZM2G034326_P01, GRMZM2G025356_P01
GO:0008169	C-methyltransferase activity	MOLECULAR_FUNCTION	0.0197891	2	2	395	6232	GRMZM2G065210_P05, GRMZM2G028552_P01
GO:0051748	UTP-monosaccharide-1-phosphate uridylyltransferase activity	MOLECULAR_FUNCTION	0.031685	2	3	395	6231	GRMZM2G312839_P01, GRMZM2G032003_P05
GO:0016165	linoleate 13S-lipoxygenase activity	MOLECULAR_FUNCTION	0.0456685	2	4	395	6230	GRMZM2G104843_P01, GRMZM2G156861_P02
GO:0004634	phosphopyruvate hydratase activity	MOLECULAR_FUNCTION	0.0456685	2	4	395	6230	GRMZM2G048371_P03, GRMZM2G131539_P01
GO:0004630	phospholipase D activity	MOLECULAR_FUNCTION	0.0456685	2	4	395	6230	GRMZM2G140811_P01, GRMZM2G133943_P01
GO:0070290	N-acylphosphatidylethanolamine-specific phospholipase D activity	MOLECULAR_FUNCTION	0.0456685	2	4	395	6230	GRMZM2G140811_P01, GRMZM2G133943_P01
GO:0003997	acyl-CoA oxidase activity	MOLECULAR_FUNCTION	0.0456685	2	4	395	6230	GRMZM2G099666_P01, GRMZM2G014136_P01

## Sheet: MEturquoise
GO enrichment analysis of “MEturquoise" module.
GO.ID	GO.Name	GO.Category	P.Value	Nr.Test	Nr.Reference	Non.Annot.Test	Non.Annot.Reference	SeqTest
GO:0009987	cellular process	BIOLOGICAL_PROCESS	0.00176309	1012	2812	648	2159	GRMZM2G084547_P01, GRMZM2G082962_P01, GRMZM2G366077_P01, GRMZM2G054136_P09, GRMZM2G382106_P01, GRMZM2G032315_P01, GRMZM2G145715_P01, GRMZM2G080176_P01, GRMZM2G070252_P01, GRMZM5G872417_P01, GRMZM2G035651_P01, GRMZM2G068455_P01, GRMZM2G363540_P01, GRMZM2G158789_P01, GRMZM2G034575_P01, GRMZM2G114888_P02, GRMZM2G082214_P01, GRMZM5G878379_P01, GRMZM2G010991_P01, GRMZM5G870219_P02, GRMZM2G359070_P01, …
GO:0003824	catalytic activity	MOLECULAR_FUNCTION	0.0333085	832	2642	828	2329	GRMZM2G084547_P01, GRMZM2G158629_P02, GRMZM2G108103_P01, GRMZM2G145715_P01, GRMZM2G394968_P01, GRMZM2G126285_P02, GRMZM2G080176_P01, GRMZM2G060947_P01, GRMZM2G070252_P01, GRMZM5G872417_P01, GRMZM2G035651_P01, GRMZM2G068455_P01, GRMZM2G363540_P01, GRMZM2G158789_P01, GRMZM2G034575_P01, GRMZM2G026309_P01, GRMZM2G142217_P01, GRMZM2G082214_P01, GRMZM2G165919_P01, GRMZM5G870219_P02, GRMZM2G359070_P01, …
GO:0006807	nitrogen compound metabolic process	BIOLOGICAL_PROCESS	0.000923178	706	1884	954	3087	GRMZM2G076399_P01, GRMZM2G084547_P01, GRMZM2G082962_P01, GRMZM2G366077_P01, GRMZM2G056462_P01, GRMZM2G054136_P09, GRMZM2G000753_P01, GRMZM5G826801_P02, GRMZM2G032315_P01, GRMZM2G145715_P01, GRMZM2G466780_P01, GRMZM2G049342_P01, GRMZM2G452026_P01, GRMZM2G083689_P01, GRMZM2G080176_P01, GRMZM2G141707_P01, GRMZM2G156068_P01, GRMZM5G872417_P01, GRMZM2G035651_P01, GRMZM2G363540_P01, GRMZM2G158789_P01, …
GO:1901564	organonitrogen compound metabolic process	BIOLOGICAL_PROCESS	2.04393e-05	586	1474	1074	3497	GRMZM2G084547_P01, GRMZM2G082962_P01, GRMZM2G366077_P01, GRMZM2G056462_P01, GRMZM2G054136_P09, GRMZM2G000753_P01, GRMZM5G826801_P02, GRMZM2G032315_P01, GRMZM2G145715_P01, GRMZM2G049342_P01, GRMZM2G452026_P01, GRMZM2G083689_P01, GRMZM2G156068_P01, GRMZM2G035651_P01, GRMZM2G363540_P01, GRMZM2G093574_P02, GRMZM2G019744_P01, GRMZM2G114888_P02, GRMZM2G445100_P02, GRMZM2G156673_P01, GRMZM2G026309_P01, …
GO:0043170	macromolecule metabolic process	BIOLOGICAL_PROCESS	0.0177006	569	1547	1091	3424	GRMZM2G076399_P01, GRMZM2G084547_P01, GRMZM2G082962_P01, GRMZM2G366077_P01, GRMZM2G056462_P01, GRMZM2G054136_P09, GRMZM5G826801_P02, GRMZM2G032315_P01, GRMZM2G466780_P01, GRMZM2G049342_P01, GRMZM2G452026_P01, GRMZM2G083689_P01, GRMZM2G051677_P01, GRMZM2G080176_P01, GRMZM2G141707_P01, GRMZM2G156068_P01, GRMZM5G872417_P01, GRMZM2G035651_P01, GRMZM2G158789_P01, GRMZM2G093574_P02, GRMZM2G034575_P01, …
GO:0009058	biosynthetic process	BIOLOGICAL_PROCESS	3.12581e-07	511	1209	1149	3762	GRMZM2G366077_P01, GRMZM2G056462_P01, GRMZM2G054136_P09, GRMZM5G826801_P02, GRMZM2G032315_P01, GRMZM2G466780_P01, GRMZM2G049342_P01, GRMZM2G452026_P01, GRMZM2G083689_P01, GRMZM2G051677_P01, GRMZM2G080176_P01, GRMZM2G141707_P01, GRMZM2G156068_P01, GRMZM2G093574_P02, GRMZM2G034575_P01, GRMZM2G019744_P01, GRMZM2G114888_P02, GRMZM2G156673_P01, GRMZM5G862540_P01, GRMZM2G082214_P01, GRMZM2G010991_P01, …
GO:1901576	organic substance biosynthetic process	BIOLOGICAL_PROCESS	3.14292e-07	494	1162	1166	3809	GRMZM2G366077_P01, GRMZM2G056462_P01, GRMZM2G054136_P09, GRMZM5G826801_P02, GRMZM2G032315_P01, GRMZM2G466780_P01, GRMZM2G049342_P01, GRMZM2G452026_P01, GRMZM2G083689_P01, GRMZM2G051677_P01, GRMZM2G080176_P01, GRMZM2G141707_P01, GRMZM2G156068_P01, GRMZM2G093574_P02, GRMZM2G034575_P01, GRMZM2G019744_P01, GRMZM2G114888_P02, GRMZM2G156673_P01, GRMZM5G862540_P01, GRMZM2G082214_P01, GRMZM2G010991_P01, …
GO:0034641	cellular nitrogen compound metabolic process	BIOLOGICAL_PROCESS	9.30557e-08	490	1139	1170	3832	GRMZM2G076399_P01, GRMZM2G366077_P01, GRMZM2G056462_P01, GRMZM2G054136_P09, GRMZM5G826801_P02, GRMZM2G032315_P01, GRMZM2G145715_P01, GRMZM2G466780_P01, GRMZM2G049342_P01, GRMZM2G452026_P01, GRMZM2G083689_P01, GRMZM2G080176_P01, GRMZM2G141707_P01, GRMZM2G156068_P01, GRMZM5G872417_P01, GRMZM2G363540_P01, GRMZM2G158789_P01, GRMZM2G093574_P02, GRMZM2G019744_P01, GRMZM2G114888_P02, GRMZM2G156673_P01, …
GO:0043167	ion binding	MOLECULAR_FUNCTION	0.0339834	475	1561	1185	3410	GRMZM2G056462_P01, GRMZM2G108103_P01, GRMZM2G140342_P01, GRMZM2G106960_P01, GRMZM2G000753_P01, GRMZM2G109121_P02, GRMZM2G130127_P01, GRMZM2G049342_P01, GRMZM2G126285_P02, GRMZM2G051677_P01, GRMZM2G156068_P01, GRMZM2G070252_P01, GRMZM2G038494_P01, GRMZM2G120579_P01, GRMZM5G878379_P01, GRMZM2G165919_P01, GRMZM5G870219_P02, GRMZM2G129783_P01, GRMZM2G068471_P01, GRMZM2G009464_P01, GRMZM2G020295_P02, …
GO:0044249	cellular biosynthetic process	BIOLOGICAL_PROCESS	2.19483e-07	470	1093	1190	3878	GRMZM2G366077_P01, GRMZM2G056462_P01, GRMZM2G054136_P09, GRMZM5G826801_P02, GRMZM2G032315_P01, GRMZM2G466780_P01, GRMZM2G049342_P01, GRMZM2G452026_P01, GRMZM2G083689_P01, GRMZM2G051677_P01, GRMZM2G080176_P01, GRMZM2G141707_P01, GRMZM2G156068_P01, GRMZM2G093574_P02, GRMZM2G034575_P01, GRMZM2G019744_P01, GRMZM2G114888_P02, GRMZM2G156673_P01, GRMZM5G862540_P01, GRMZM2G082214_P01, GRMZM2G010991_P01, …
GO:0044260	cellular macromolecule metabolic process	BIOLOGICAL_PROCESS	0.00140188	470	1210	1190	3761	GRMZM2G084547_P01, GRMZM2G082962_P01, GRMZM2G366077_P01, GRMZM2G056462_P01, GRMZM2G054136_P09, GRMZM5G826801_P02, GRMZM2G032315_P01, GRMZM2G466780_P01, GRMZM2G049342_P01, GRMZM2G452026_P01, GRMZM2G083689_P01, GRMZM2G051677_P01, GRMZM2G080176_P01, GRMZM2G141707_P01, GRMZM2G156068_P01, GRMZM2G035651_P01, GRMZM2G158789_P01, GRMZM2G093574_P02, GRMZM2G034575_P01, GRMZM2G019744_P01, GRMZM2G114888_P02, …
GO:0019538	protein metabolic process	BIOLOGICAL_PROCESS	3.33007e-05	416	1003	1244	3968	GRMZM2G084547_P01, GRMZM2G082962_P01, GRMZM2G366077_P01, GRMZM2G056462_P01, GRMZM2G054136_P09, GRMZM5G826801_P02, GRMZM2G032315_P01, GRMZM2G049342_P01, GRMZM2G452026_P01, GRMZM2G083689_P01, GRMZM2G156068_P01, GRMZM2G035651_P01, GRMZM2G093574_P02, GRMZM2G019744_P01, GRMZM2G114888_P02, GRMZM2G445100_P02, GRMZM2G156673_P01, GRMZM2G026309_P01, GRMZM5G878379_P01, GRMZM2G010991_P01, GRMZM2G166694_P04, …
GO:1901360	organic cyclic compound metabolic process	BIOLOGICAL_PROCESS	0.00342182	378	965	1282	4006	GRMZM2G076399_P01, GRMZM2G078143_P01, GRMZM2G377797_P01, GRMZM5G800853_P01, GRMZM2G054136_P09, GRMZM2G178192_P03, GRMZM2G008273_P01, GRMZM2G466543_P01, GRMZM2G145715_P01, GRMZM2G466780_P01, GRMZM2G052926_P01, GRMZM2G049342_P01, GRMZM2G083689_P01, GRMZM5G807835_P01, GRMZM2G055320_P01, GRMZM2G080176_P01, GRMZM2G141707_P01, GRMZM2G156068_P01, GRMZM5G872417_P01, GRMZM2G307906_P01, GRMZM2G095969_P02, …
GO:0044267	cellular protein metabolic process	BIOLOGICAL_PROCESS	5.32344e-06	374	865	1286	4106	GRMZM2G463464_P02, GRMZM2G084547_P01, GRMZM2G082962_P01, GRMZM2G133249_P01, GRMZM2G377797_P01, GRMZM2G366077_P01, GRMZM2G056462_P01, GRMZM2G054136_P09, GRMZM2G112728_P04, GRMZM5G826801_P02, GRMZM2G018197_P01, GRMZM2G178192_P03, GRMZM2G008273_P01, GRMZM2G032315_P01, GRMZM2G000710_P01, GRMZM2G078933_P01, GRMZM2G049342_P01, GRMZM2G024647_P01, GRMZM2G452026_P01, GRMZM2G083689_P01, GRMZM2G156068_P01, …
GO:0006725	cellular aromatic compound metabolic process	BIOLOGICAL_PROCESS	0.00550027	368	944	1292	4027	GRMZM2G076399_P01, GRMZM2G078143_P01, GRMZM2G377797_P01, GRMZM5G800853_P01, GRMZM2G054136_P09, GRMZM2G178192_P03, GRMZM2G008273_P01, GRMZM2G466543_P01, GRMZM2G145715_P01, GRMZM2G466780_P01, GRMZM2G052926_P01, GRMZM2G049342_P01, GRMZM2G083689_P01, GRMZM5G807835_P01, GRMZM2G055320_P01, GRMZM2G080176_P01, GRMZM2G141707_P01, GRMZM2G156068_P01, GRMZM5G872417_P01, GRMZM2G307906_P01, GRMZM2G095969_P02, …
GO:0044271	cellular nitrogen compound biosynthetic process	BIOLOGICAL_PROCESS	4.42019e-07	336	738	1324	4233	GRMZM2G377797_P01, GRMZM5G800853_P01, GRMZM2G366077_P01, GRMZM2G056462_P01, GRMZM2G054136_P09, GRMZM5G826801_P02, GRMZM2G018197_P01, GRMZM2G178192_P03, GRMZM2G008273_P01, GRMZM2G032315_P01, GRMZM2G466780_P01, GRMZM2G049342_P01, GRMZM2G024647_P01, GRMZM2G452026_P01, GRMZM2G083689_P01, GRMZM5G807835_P01, GRMZM2G080176_P01, GRMZM2G141707_P01, GRMZM2G156068_P01, GRMZM2G015571_P01, GRMZM2G093574_P02, …
GO:1901566	organonitrogen compound biosynthetic process	BIOLOGICAL_PROCESS	9.30333e-09	317	656	1343	4315	GRMZM2G377797_P01, GRMZM2G366077_P01, GRMZM2G056462_P01, GRMZM2G054136_P09, GRMZM5G826801_P02, GRMZM2G018197_P01, GRMZM2G466543_P01, GRMZM2G032315_P01, GRMZM2G024647_P01, GRMZM2G452026_P01, GRMZM2G083689_P01, GRMZM5G807835_P01, GRMZM2G156068_P01, GRMZM2G015571_P01, GRMZM2G149428_P01, GRMZM2G093574_P02, GRMZM2G114888_P02, GRMZM2G156673_P01, GRMZM2G386714_P01, GRMZM5G862540_P01, GRMZM2G082214_P01, …
GO:0006139	nucleobase-containing compound metabolic process	BIOLOGICAL_PROCESS	0.0239527	315	821	1345	4150	GRMZM2G076399_P01, GRMZM2G377797_P01, GRMZM5G800853_P01, GRMZM2G054136_P09, GRMZM2G178192_P03, GRMZM2G008273_P01, GRMZM2G145715_P01, GRMZM2G466780_P01, GRMZM2G052926_P01, GRMZM2G049342_P01, GRMZM2G083689_P01, GRMZM2G080176_P01, GRMZM2G141707_P01, GRMZM2G156068_P01, GRMZM5G872417_P01, GRMZM2G307906_P01, GRMZM2G095969_P02, GRMZM2G127798_P01, GRMZM2G128432_P01, GRMZM2G158789_P01, GRMZM2G093574_P02, …
GO:0010467	gene expression	BIOLOGICAL_PROCESS	8.69818e-05	308	718	1352	4253	GRMZM2G076399_P01, GRMZM2G133249_P01, GRMZM2G377797_P01, GRMZM5G800853_P01, GRMZM2G366077_P01, GRMZM2G056462_P01, GRMZM2G054136_P09, GRMZM5G826801_P02, GRMZM2G018197_P01, GRMZM2G178192_P03, GRMZM2G008273_P01, GRMZM2G032315_P01, GRMZM2G000710_P01, GRMZM2G466780_P01, GRMZM2G052926_P01, GRMZM2G049342_P01, GRMZM2G024647_P01, GRMZM2G452026_P01, GRMZM2G083689_P01, GRMZM2G080176_P01, GRMZM2G141707_P01, …
GO:0009059	macromolecule biosynthetic process	BIOLOGICAL_PROCESS	1.49821e-06	285	615	1375	4356	GRMZM2G377797_P01, GRMZM5G800853_P01, GRMZM2G366077_P01, GRMZM2G056462_P01, GRMZM2G054136_P09, GRMZM5G826801_P02, GRMZM2G018197_P01, GRMZM2G178192_P03, GRMZM2G008273_P01, GRMZM2G032315_P01, GRMZM2G466780_P01, GRMZM2G049342_P01, GRMZM2G024647_P01, GRMZM2G452026_P01, GRMZM2G083689_P01, GRMZM2G051677_P01, GRMZM2G080176_P01, GRMZM2G141707_P01, GRMZM2G015571_P01, GRMZM2G128432_P01, GRMZM2G093574_P02, …
GO:0016787	hydrolase activity	MOLECULAR_FUNCTION	0.00975821	285	997	1375	3974	GRMZM2G157310_P02, GRMZM2G133249_P01, GRMZM2G109121_P02, GRMZM2G414915_P01, GRMZM2G000710_P01, GRMZM2G030072_P02, GRMZM2G086636_P01, GRMZM2G168364_P01, GRMZM2G060947_P01, GRMZM2G156068_P01, GRMZM2G170842_P01, GRMZM2G035651_P01, GRMZM2G095969_P02, GRMZM2G038494_P01, GRMZM2G158789_P01, GRMZM2G034575_P01, GRMZM2G019744_P01, GRMZM2G445100_P02, GRMZM2G026309_P01, GRMZM2G082214_P01, GRMZM2G473906_P05, …
GO:0071840	cellular component organization or biogenesis	BIOLOGICAL_PROCESS	1.0715e-05	284	632	1376	4339	GRMZM2G076399_P01, GRMZM2G377797_P01, GRMZM2G015861_P02, GRMZM2G054136_P09, GRMZM2G157019_P01, GRMZM2G140342_P01, GRMZM2G008273_P01, GRMZM2G000710_P01, GRMZM2G466780_P01, GRMZM2G078933_P01, GRMZM2G049342_P01, GRMZM2G024647_P01, GRMZM2G452026_P01, GRMZM2G083689_P01, GRMZM2G141707_P01, GRMZM2G307906_P01, GRMZM2G035651_P01, GRMZM2G158789_P01, GRMZM2G093574_P02, GRMZM2G034575_P01, GRMZM2G117746_P01, …
GO:0034645	cellular macromolecule biosynthetic process	BIOLOGICAL_PROCESS	2.37405e-06	279	605	1381	4366	GRMZM2G377797_P01, GRMZM5G800853_P01, GRMZM2G366077_P01, GRMZM2G056462_P01, GRMZM2G054136_P09, GRMZM5G826801_P02, GRMZM2G018197_P01, GRMZM2G178192_P03, GRMZM2G008273_P01, GRMZM2G032315_P01, GRMZM2G466780_P01, GRMZM2G049342_P01, GRMZM2G024647_P01, GRMZM2G452026_P01, GRMZM2G083689_P01, GRMZM2G051677_P01, GRMZM2G080176_P01, GRMZM2G141707_P01, GRMZM2G015571_P01, GRMZM2G128432_P01, GRMZM2G093574_P02, …
GO:0016043	cellular component organization	BIOLOGICAL_PROCESS	0.000885687	244	573	1416	4398	GRMZM2G076399_P01, GRMZM2G015861_P02, GRMZM2G157019_P01, GRMZM2G140342_P01, GRMZM2G008273_P01, GRMZM2G000710_P01, GRMZM2G466780_P01, GRMZM2G078933_P01, GRMZM2G049342_P01, GRMZM2G024647_P01, GRMZM2G452026_P01, GRMZM2G083689_P01, GRMZM2G141707_P01, GRMZM2G307906_P01, GRMZM2G035651_P01, GRMZM2G034575_P01, GRMZM2G117746_P01, GRMZM2G156673_P01, GRMZM2G465169_P02, GRMZM2G115750_P01, GRMZM2G107741_P05, …
GO:0043169	cation binding	MOLECULAR_FUNCTION	6.23525e-06	220	894	1440	4077	GRMZM2G157310_P02, GRMZM2G463464_P02, GRMZM2G133249_P01, GRMZM2G056462_P01, GRMZM2G108103_P01, GRMZM2G112728_P04, GRMZM2G140342_P01, GRMZM2G000753_P01, GRMZM2G130127_P01, GRMZM2G124455_P01, GRMZM2G126285_P02, GRMZM5G807835_P01, GRMZM2G156068_P01, GRMZM2G307906_P01, GRMZM2G149428_P01, GRMZM2G165919_P01, GRMZM5G870219_P02, GRMZM2G129783_P01, GRMZM2G068471_P01, GRMZM2G020295_P02, GRMZM2G091563_P01, …
GO:0046872	metal ion binding	MOLECULAR_FUNCTION	1.64762e-05	220	882	1440	4089	GRMZM2G157310_P02, GRMZM2G463464_P02, GRMZM2G133249_P01, GRMZM2G056462_P01, GRMZM2G108103_P01, GRMZM2G112728_P04, GRMZM2G140342_P01, GRMZM2G000753_P01, GRMZM2G130127_P01, GRMZM2G124455_P01, GRMZM2G126285_P02, GRMZM5G807835_P01, GRMZM2G156068_P01, GRMZM2G307906_P01, GRMZM2G149428_P01, GRMZM2G165919_P01, GRMZM5G870219_P02, GRMZM2G129783_P01, GRMZM2G068471_P01, GRMZM2G020295_P02, GRMZM2G091563_P01, …
GO:0043603	cellular amide metabolic process	BIOLOGICAL_PROCESS	1.84707e-12	217	359	1443	4612	GRMZM2G078143_P01, GRMZM2G133249_P01, GRMZM2G377797_P01, GRMZM2G366077_P01, GRMZM2G056462_P01, GRMZM2G054136_P09, GRMZM5G826801_P02, GRMZM2G018197_P01, GRMZM2G032315_P01, GRMZM2G000710_P01, GRMZM2G024647_P01, GRMZM2G452026_P01, GRMZM5G807835_P01, GRMZM2G015571_P01, GRMZM2G363540_P01, GRMZM2G093574_P02, GRMZM2G114888_P02, GRMZM2G156673_P01, GRMZM2G386714_P01, GRMZM2G010991_P01, GRMZM2G028945_P01, …
GO:0006518	peptide metabolic process	BIOLOGICAL_PROCESS	1.54872e-13	202	313	1458	4658	GRMZM2G133249_P01, GRMZM2G377797_P01, GRMZM2G366077_P01, GRMZM2G056462_P01, GRMZM2G054136_P09, GRMZM5G826801_P02, GRMZM2G018197_P01, GRMZM2G032315_P01, GRMZM2G000710_P01, GRMZM2G024647_P01, GRMZM2G452026_P01, GRMZM2G015571_P01, GRMZM2G363540_P01, GRMZM2G093574_P02, GRMZM2G114888_P02, GRMZM2G156673_P01, GRMZM2G386714_P01, GRMZM2G010991_P01, GRMZM2G028945_P01, GRMZM2G178079_P02, GRMZM2G119169_P02, …
GO:0043604	amide biosynthetic process	BIOLOGICAL_PROCESS	5.88843e-09	179	313	1481	4658	GRMZM2G377797_P01, GRMZM5G849223_P01, GRMZM2G176662_P01, GRMZM5G868062_P04, GRMZM2G366077_P01, GRMZM2G102075_P01, GRMZM2G056462_P01, GRMZM2G054136_P09, GRMZM2G038313_P01, GRMZM5G826801_P02, GRMZM2G018197_P01, GRMZM5G877316_P02, GRMZM2G032315_P01, GRMZM6G741620_P02, GRMZM2G135654_P01, GRMZM2G050596_P01, GRMZM2G072315_P01, GRMZM2G024647_P01, GRMZM2G452026_P01, GRMZM2G091383_P01, GRMZM5G807835_P01, …
GO:0055114	oxidation-reduction process	BIOLOGICAL_PROCESS	0.0374604	178	629	1482	4342	GRMZM2G105855_P01, GRMZM2G071021_P01, GRMZM2G108103_P01, GRMZM2G082581_P01, GRMZM2G139680_P01, GRMZM2G000753_P01, GRMZM2G022248_P01, GRMZM2G056081_P01, GRMZM2G062396_P01, GRMZM2G145715_P01, GRMZM2G130230_P03, GRMZM2G029856_P01, GRMZM2G006085_P01, GRMZM2G143202_P01, GRMZM2G394968_P01, GRMZM2G078569_P03, GRMZM2G124455_P01, GRMZM2G126285_P02, GRMZM2G141707_P01, GRMZM2G093197_P01, GRMZM2G128171_P03, …
GO:0043043	peptide biosynthetic process	BIOLOGICAL_PROCESS	4.23887e-10	171	280	1489	4691	GRMZM2G377797_P01, GRMZM5G849223_P01, GRMZM2G176662_P01, GRMZM5G868062_P04, GRMZM2G366077_P01, GRMZM2G102075_P01, GRMZM2G056462_P01, GRMZM2G054136_P09, GRMZM2G038313_P01, GRMZM5G826801_P02, GRMZM2G018197_P01, GRMZM5G877316_P02, GRMZM2G032315_P01, GRMZM6G741620_P02, GRMZM2G135654_P01, GRMZM2G050596_P01, GRMZM2G072315_P01, GRMZM2G024647_P01, GRMZM2G452026_P01, GRMZM2G091383_P01, GRMZM2G177970_P01, …
GO:0006412	translation	BIOLOGICAL_PROCESS	3.57107e-10	170	277	1490	4694	GRMZM2G377797_P01, GRMZM5G849223_P01, GRMZM2G176662_P01, GRMZM5G868062_P04, GRMZM2G366077_P01, GRMZM2G102075_P01, GRMZM2G056462_P01, GRMZM2G054136_P09, GRMZM2G038313_P01, GRMZM5G826801_P02, GRMZM2G018197_P01, GRMZM5G877316_P02, GRMZM2G032315_P01, GRMZM6G741620_P02, GRMZM2G135654_P01, GRMZM2G050596_P01, GRMZM2G072315_P01, GRMZM2G024647_P01, GRMZM2G452026_P01, GRMZM2G091383_P01, GRMZM2G177970_P01, …
GO:0044085	cellular component biogenesis	BIOLOGICAL_PROCESS	6.81584e-09	166	283	1494	4688	GRMZM2G076399_P01, GRMZM2G025078_P01, GRMZM2G377797_P01, GRMZM5G868062_P04, GRMZM2G102075_P01, GRMZM2G054136_P09, GRMZM2G038313_P01, GRMZM2G157019_P01, GRMZM2G140342_P01, GRMZM2G107588_P01, GRMZM2G106164_P01, GRMZM2G087326_P01, GRMZM2G000710_P01, GRMZM2G135654_P01, GRMZM2G049342_P01, GRMZM2G110185_P02, GRMZM2G024647_P01, GRMZM2G171745_P02, GRMZM2G342386_P02, GRMZM2G416751_P01, GRMZM2G091383_P01, …
GO:0016491	oxidoreductase activity	MOLECULAR_FUNCTION	0.017342	160	585	1500	4386	GRMZM2G105855_P01, GRMZM2G071021_P01, GRMZM2G108103_P01, GRMZM2G082581_P01, GRMZM2G139680_P01, GRMZM2G000753_P01, GRMZM2G022248_P01, GRMZM2G056081_P01, GRMZM2G062396_P01, GRMZM2G145715_P01, GRMZM2G130230_P03, GRMZM2G029856_P01, GRMZM2G006085_P01, GRMZM2G143202_P01, GRMZM2G394968_P01, GRMZM2G078569_P03, GRMZM2G124455_P01, GRMZM2G126285_P02, GRMZM2G141707_P01, GRMZM2G093197_P01, GRMZM2G128171_P03, …
GO:0005515	protein binding	MOLECULAR_FUNCTION	0.000455589	149	316	1511	4655	GRMZM2G463464_P02, GRMZM2G129218_P01, GRMZM2G387076_P02, GRMZM2G140545_P01, GRMZM2G058276_P01, GRMZM2G139680_P01, GRMZM2G011456_P02, GRMZM2G107571_P01, GRMZM2G087326_P01, GRMZM2G098460_P01, GRMZM2G330772_P02, GRMZM2G078933_P01, GRMZM2G049342_P01, GRMZM2G168706_P04, GRMZM2G110185_P02, GRMZM2G342386_P02, GRMZM2G138419_P01, GRMZM2G007441_P01, GRMZM5G879235_P01, GRMZM2G022258_P01, GRMZM2G071518_P01, …
GO:0003723	RNA binding	MOLECULAR_FUNCTION	0.0307674	144	350	1516	4621	GRMZM5G849223_P01, GRMZM2G176662_P01, GRMZM5G868062_P04, GRMZM2G102075_P01, GRMZM2G056462_P01, GRMZM2G038313_P01, GRMZM5G877316_P02, GRMZM2G032315_P01, GRMZM2G052926_P01, GRMZM2G135654_P01, GRMZM2G072315_P01, GRMZM2G452026_P01, GRMZM2G083689_P01, GRMZM5G872417_P01, GRMZM2G027728_P01, GRMZM2G114888_P02, GRMZM2G156673_P01, GRMZM2G110233_P01, GRMZM2G028945_P01, GRMZM2G068471_P01, GRMZM2G439201_P02, …
GO:0032502	developmental process	BIOLOGICAL_PROCESS	0.0270146	125	296	1535	4675	GRMZM2G025078_P01, GRMZM2G015861_P02, GRMZM2G038313_P01, GRMZM2G107588_P01, GRMZM2G008273_P01, GRMZM2G052926_P01, GRMZM2G049342_P01, GRMZM2G171745_P02, GRMZM2G342386_P02, GRMZM2G416751_P01, GRMZM2G083689_P01, GRMZM2G177970_P01, GRMZM2G128171_P03, GRMZM2G170842_P01, GRMZM2G071575_P01, GRMZM2G542994_P01, GRMZM2G047855_P01, GRMZM2G158789_P01, GRMZM2G034575_P01, GRMZM2G117746_P01, GRMZM2G032267_P01, …
GO:0048856	anatomical structure development	BIOLOGICAL_PROCESS	0.0205242	121	282	1539	4689	GRMZM2G025078_P01, GRMZM2G015861_P02, GRMZM2G038313_P01, GRMZM2G107588_P01, GRMZM2G008273_P01, GRMZM2G049342_P01, GRMZM2G171745_P02, GRMZM2G342386_P02, GRMZM2G416751_P01, GRMZM2G083689_P01, GRMZM2G177970_P01, GRMZM2G128171_P03, GRMZM2G170842_P01, GRMZM2G071575_P01, GRMZM2G542994_P01, GRMZM2G047855_P01, GRMZM2G158789_P01, GRMZM2G034575_P01, GRMZM2G117746_P01, GRMZM2G032267_P01, GRMZM2G017647_P01, …
GO:0005198	structural molecule activity	MOLECULAR_FUNCTION	1.70106e-09	121	177	1539	4794	GRMZM2G092284_P01, GRMZM2G377797_P01, GRMZM5G849223_P01, GRMZM2G176662_P01, GRMZM2G366077_P01, GRMZM2G102075_P01, GRMZM2G028929_P02, GRMZM2G054136_P09, GRMZM5G826801_P02, GRMZM2G018197_P01, GRMZM2G032315_P01, GRMZM6G741620_P02, GRMZM2G135654_P01, GRMZM2G072315_P01, GRMZM2G024647_P01, GRMZM2G091383_P01, GRMZM2G071518_P01, GRMZM2G027728_P01, GRMZM2G015571_P01, GRMZM2G093574_P02, GRMZM2G114888_P02, …
GO:0033036	macromolecule localization	BIOLOGICAL_PROCESS	0.0156916	118	271	1542	4700	GRMZM2G170044_P01, GRMZM2G361220_P01, GRMZM2G028929_P02, GRMZM2G038313_P01, GRMZM2G159777_P01, GRMZM2G106960_P01, GRMZM2G107588_P01, GRMZM2G107571_P01, GRMZM2G000710_P01, GRMZM2G330772_P02, GRMZM2G078933_P01, GRMZM2G122805_P01, GRMZM2G073498_P01, GRMZM2G086636_P01, GRMZM2G101938_P01, GRMZM2G083689_P01, GRMZM2G138419_P01, GRMZM2G007441_P01, GRMZM2G061912_P01, GRMZM2G022258_P01, GRMZM2G102903_P02, …
GO:0051641	cellular localization	BIOLOGICAL_PROCESS	0.0344223	115	273	1545	4698	GRMZM2G361220_P01, GRMZM2G028929_P02, GRMZM2G038313_P01, GRMZM2G159777_P01, GRMZM2G106960_P01, GRMZM2G107588_P01, GRMZM2G107571_P01, GRMZM2G097568_P01, GRMZM2G000710_P01, GRMZM2G330772_P02, GRMZM2G078933_P01, GRMZM2G022876_P01, GRMZM2G086636_P01, GRMZM2G138419_P01, GRMZM2G007441_P01, GRMZM2G022258_P01, GRMZM2G102903_P02, GRMZM2G139123_P01, GRMZM2G035651_P01, GRMZM2G094388_P01, GRMZM2G125149_P01, …
GO:0022607	cellular component assembly	BIOLOGICAL_PROCESS	9.73476e-05	112	212	1548	4759	GRMZM2G076399_P01, GRMZM2G025078_P01, GRMZM2G102075_P01, GRMZM2G038313_P01, GRMZM2G157019_P01, GRMZM2G140342_P01, GRMZM2G107588_P01, GRMZM2G106164_P01, GRMZM2G000710_P01, GRMZM2G049342_P01, GRMZM2G110185_P02, GRMZM2G024647_P01, GRMZM2G171745_P02, GRMZM2G342386_P02, GRMZM2G416751_P01, GRMZM2G069726_P01, GRMZM2G071518_P01, GRMZM2G139123_P01, GRMZM2G307906_P01, GRMZM5G826714_P01, GRMZM2G156673_P01, …
GO:0032501	multicellular organismal process	BIOLOGICAL_PROCESS	0.0365713	111	263	1549	4708	GRMZM2G025078_P01, GRMZM2G015861_P02, GRMZM2G038313_P01, GRMZM2G178192_P03, GRMZM2G107588_P01, GRMZM2G008273_P01, GRMZM2G049342_P01, GRMZM2G171745_P02, GRMZM2G342386_P02, GRMZM2G416751_P01, GRMZM2G083689_P01, GRMZM2G177970_P01, GRMZM2G128171_P03, GRMZM2G170842_P01, GRMZM2G071575_P01, GRMZM2G542994_P01, GRMZM2G047855_P01, GRMZM2G158789_P01, GRMZM2G117746_P01, GRMZM2G017647_P01, GRMZM2G465169_P02, …
GO:0008104	protein localization	BIOLOGICAL_PROCESS	0.027327	107	248	1553	4723	GRMZM2G361220_P01, GRMZM2G028929_P02, GRMZM2G038313_P01, GRMZM2G159777_P01, GRMZM2G106960_P01, GRMZM2G107588_P01, GRMZM2G107571_P01, GRMZM2G000710_P01, GRMZM2G330772_P02, GRMZM2G078933_P01, GRMZM2G122805_P01, GRMZM2G073498_P01, GRMZM2G086636_P01, GRMZM2G101938_P01, GRMZM2G138419_P01, GRMZM2G007441_P01, GRMZM2G061912_P01, GRMZM2G022258_P01, GRMZM2G102903_P02, GRMZM2G035651_P01, GRMZM2G094388_P01, …
GO:0007275	multicellular organism development	BIOLOGICAL_PROCESS	0.0265061	106	245	1554	4726	GRMZM2G025078_P01, GRMZM2G015861_P02, GRMZM2G038313_P01, GRMZM2G107588_P01, GRMZM2G008273_P01, GRMZM2G049342_P01, GRMZM2G171745_P02, GRMZM2G342386_P02, GRMZM2G416751_P01, GRMZM2G083689_P01, GRMZM2G177970_P01, GRMZM2G128171_P03, GRMZM2G170842_P01, GRMZM2G071575_P01, GRMZM2G542994_P01, GRMZM2G047855_P01, GRMZM2G158789_P01, GRMZM2G117746_P01, GRMZM2G017647_P01, GRMZM2G107741_P05, GRMZM5G893343_P01, …
GO:0055086	nucleobase-containing small molecule metabolic process	BIOLOGICAL_PROCESS	0.0319137	106	248	1554	4723	GRMZM2G178192_P03, GRMZM2G087326_P01, GRMZM2G109731_P01, GRMZM2G145715_P01, GRMZM2G130230_P03, GRMZM2G029856_P01, GRMZM2G396451_P02, GRMZM2G402319_P01, GRMZM2G128171_P03, GRMZM2G156068_P01, GRMZM2G035338_P02, GRMZM2G018728_P01, GRMZM2G127798_P01, GRMZM2G440208_P01, GRMZM2G114888_P02, GRMZM2G321725_P02, GRMZM5G862540_P01, GRMZM2G082214_P01, GRMZM2G107741_P05, GRMZM2G359070_P01, GRMZM2G068471_P01, …
GO:0048037	cofactor binding	MOLECULAR_FUNCTION	0.0323031	106	398	1554	4573	GRMZM2G078143_P01, GRMZM2G082581_P01, GRMZM2G000753_P01, GRMZM2G022248_P01, GRMZM2G062396_P01, GRMZM2G130230_P03, GRMZM2G029856_P01, GRMZM2G143202_P01, GRMZM2G169593_P01, GRMZM2G143008_P01, GRMZM2G036880_P01, GRMZM2G149428_P01, GRMZM5G862540_P01, GRMZM2G005024_P01, GRMZM2G010861_P01, GRMZM5G856734_P01, GRMZM2G146677_P01, GRMZM2G057000_P03, GRMZM2G063949_P01, GRMZM2G168412_P02, GRMZM5G829778_P01, …
GO:0045184	establishment of protein localization	BIOLOGICAL_PROCESS	0.0243733	103	237	1557	4734	GRMZM2G361220_P01, GRMZM2G028929_P02, GRMZM2G038313_P01, GRMZM2G159777_P01, GRMZM2G106960_P01, GRMZM2G107588_P01, GRMZM2G107571_P01, GRMZM2G000710_P01, GRMZM2G330772_P02, GRMZM2G078933_P01, GRMZM2G122805_P01, GRMZM2G073498_P01, GRMZM2G086636_P01, GRMZM2G101938_P01, GRMZM2G138419_P01, GRMZM2G007441_P01, GRMZM2G061912_P01, GRMZM2G022258_P01, GRMZM2G102903_P02, GRMZM2G035651_P01, GRMZM2G094388_P01, …
GO:0042886	amide transport	BIOLOGICAL_PROCESS	0.0291966	103	239	1557	4732	GRMZM2G361220_P01, GRMZM2G028929_P02, GRMZM2G038313_P01, GRMZM2G159777_P01, GRMZM2G106960_P01, GRMZM2G107588_P01, GRMZM2G107571_P01, GRMZM2G000710_P01, GRMZM2G330772_P02, GRMZM2G078933_P01, GRMZM2G122805_P01, GRMZM2G073498_P01, GRMZM2G086636_P01, GRMZM2G101938_P01, GRMZM2G138419_P01, GRMZM2G007441_P01, GRMZM2G061912_P01, GRMZM2G022258_P01, GRMZM2G102903_P02, GRMZM2G035651_P01, GRMZM2G094388_P01, …
GO:0015833	peptide transport	BIOLOGICAL_PROCESS	0.0291966	103	239	1557	4732	GRMZM2G361220_P01, GRMZM2G028929_P02, GRMZM2G038313_P01, GRMZM2G159777_P01, GRMZM2G106960_P01, GRMZM2G107588_P01, GRMZM2G107571_P01, GRMZM2G000710_P01, GRMZM2G330772_P02, GRMZM2G078933_P01, GRMZM2G122805_P01, GRMZM2G073498_P01, GRMZM2G086636_P01, GRMZM2G101938_P01, GRMZM2G138419_P01, GRMZM2G007441_P01, GRMZM2G061912_P01, GRMZM2G022258_P01, GRMZM2G102903_P02, GRMZM2G035651_P01, GRMZM2G094388_P01, …
GO:0043933	protein-containing complex subunit organization	BIOLOGICAL_PROCESS	9.74047e-06	102	175	1558	4796	GRMZM2G076399_P01, GRMZM2G025078_P01, GRMZM2G102075_P01, GRMZM2G038313_P01, GRMZM2G157019_P01, GRMZM2G140342_P01, GRMZM2G107588_P01, GRMZM2G106164_P01, GRMZM2G000710_P01, GRMZM2G049342_P01, GRMZM2G110185_P02, GRMZM2G024647_P01, GRMZM2G171745_P02, GRMZM2G342386_P02, GRMZM2G452026_P01, GRMZM2G071518_P01, GRMZM2G139123_P01, GRMZM2G307906_P01, GRMZM2G156673_P01, GRMZM2G028945_P01, GRMZM2G359070_P01, …
GO:0015031	protein transport	BIOLOGICAL_PROCESS	0.0271189	101	232	1559	4739	GRMZM2G361220_P01, GRMZM2G028929_P02, GRMZM2G038313_P01, GRMZM2G159777_P01, GRMZM2G106960_P01, GRMZM2G107588_P01, GRMZM2G107571_P01, GRMZM2G000710_P01, GRMZM2G330772_P02, GRMZM2G078933_P01, GRMZM2G122805_P01, GRMZM2G073498_P01, GRMZM2G086636_P01, GRMZM2G101938_P01, GRMZM2G138419_P01, GRMZM2G007441_P01, GRMZM2G061912_P01, GRMZM2G022258_P01, GRMZM2G102903_P02, GRMZM2G035651_P01, GRMZM2G094388_P01, …
GO:0003735	structural constituent of ribosome	MOLECULAR_FUNCTION	3.77479e-10	101	131	1559	4840	GRMZM2G092284_P01, GRMZM2G377797_P01, GRMZM5G849223_P01, GRMZM2G176662_P01, GRMZM2G366077_P01, GRMZM2G102075_P01, GRMZM2G054136_P09, GRMZM5G826801_P02, GRMZM2G018197_P01, GRMZM2G032315_P01, GRMZM6G741620_P02, GRMZM2G135654_P01, GRMZM2G072315_P01, GRMZM2G024647_P01, GRMZM2G091383_P01, GRMZM2G027728_P01, GRMZM2G015571_P01, GRMZM2G093574_P02, GRMZM2G114888_P02, GRMZM2G156673_P01, GRMZM2G010991_P01, …
GO:0016817	hydrolase activity, acting on acid anhydrides	MOLECULAR_FUNCTION	0.0327988	101	235	1559	4736	GRMZM2G148200_P01, GRMZM2G109121_P02, GRMZM2G163325_P01, GRMZM2G157564_P02, GRMZM2G110185_P02, GRMZM2G156068_P01, GRMZM2G018728_P01, GRMZM2G038494_P01, AC194970.5_FGP009, GRMZM2G032267_P01, GRMZM2G321725_P02, GRMZM2G082214_P01, GRMZM2G077662_P02, GRMZM2G311961_P01, GRMZM5G893343_P01, GRMZM2G009464_P01, GRMZM2G070899_P01, GRMZM2G150209_P02, GRMZM2G149717_P01, AC199782.5_FGP001, GRMZM2G020295_P02, …
GO:0016462	pyrophosphatase activity	MOLECULAR_FUNCTION	0.0220259	100	228	1560	4743	GRMZM2G148200_P01, GRMZM2G109121_P02, GRMZM2G163325_P01, GRMZM2G157564_P02, GRMZM2G110185_P02, GRMZM2G156068_P01, GRMZM2G038494_P01, AC194970.5_FGP009, GRMZM2G032267_P01, GRMZM2G321725_P02, GRMZM2G082214_P01, GRMZM2G077662_P02, GRMZM2G311961_P01, GRMZM5G893343_P01, GRMZM2G009464_P01, GRMZM2G070899_P01, GRMZM2G150209_P02, GRMZM2G149717_P01, AC199782.5_FGP001, GRMZM2G020295_P02, GRMZM2G115766_P01, …
GO:0016818	hydrolase activity, acting on acid anhydrides, in phosphorus-containing anhydrides	MOLECULAR_FUNCTION	0.0314928	100	231	1560	4740	GRMZM2G148200_P01, GRMZM2G109121_P02, GRMZM2G163325_P01, GRMZM2G157564_P02, GRMZM2G110185_P02, GRMZM2G156068_P01, GRMZM2G038494_P01, AC194970.5_FGP009, GRMZM2G032267_P01, GRMZM2G321725_P02, GRMZM2G082214_P01, GRMZM2G077662_P02, GRMZM2G311961_P01, GRMZM5G893343_P01, GRMZM2G009464_P01, GRMZM2G070899_P01, GRMZM2G150209_P02, GRMZM2G149717_P01, AC199782.5_FGP001, GRMZM2G020295_P02, GRMZM2G115766_P01, …
GO:0065003	protein-containing complex assembly	BIOLOGICAL_PROCESS	4.48229e-06	97	160	1563	4811	GRMZM2G076399_P01, GRMZM2G025078_P01, GRMZM2G102075_P01, GRMZM2G038313_P01, GRMZM2G157019_P01, GRMZM2G140342_P01, GRMZM2G107588_P01, GRMZM2G106164_P01, GRMZM2G000710_P01, GRMZM2G049342_P01, GRMZM2G110185_P02, GRMZM2G024647_P01, GRMZM2G171745_P02, GRMZM2G342386_P02, GRMZM2G071518_P01, GRMZM2G139123_P01, GRMZM2G307906_P01, GRMZM2G156673_P01, GRMZM2G028945_P01, GRMZM2G359070_P01, GRMZM5G809292_P02, …
GO:0034622	cellular protein-containing complex assembly	BIOLOGICAL_PROCESS	1.04263e-06	94	147	1566	4824	GRMZM2G076399_P01, GRMZM2G422651_P01, GRMZM2G102075_P01, GRMZM2G056569_P01, GRMZM2G038313_P01, GRMZM2G157019_P01, GRMZM2G140342_P01, AC204530.4_FGP002, GRMZM2G107588_P01, GRMZM2G106164_P01, GRMZM2G000710_P01, GRMZM2G049342_P01, GRMZM2G038126_P01, GRMZM2G110185_P02, GRMZM2G024647_P01, GRMZM2G143627_P02, GRMZM2G171745_P02, GRMZM2G342386_P02, GRMZM2G356894_P01, GRMZM2G100120_P06, GRMZM2G078985_P01, …
GO:0009628	response to abiotic stimulus	BIOLOGICAL_PROCESS	0.0383677	94	219	1566	4752	GRMZM2G129218_P01, GRMZM2G025387_P01, GRMZM2G462803_P02, GRMZM2G025078_P01, GRMZM2G315375_P01, GRMZM2G038313_P01, GRMZM2G107588_P01, AC155496.2_FGP009, GRMZM2G008273_P01, GRMZM2G162413_P02, GRMZM2G062396_P01, GRMZM2G153184_P01, GRMZM2G145715_P01, GRMZM2G020034_P01, GRMZM2G038519_P01, GRMZM2G014720_P01, GRMZM2G078569_P03, GRMZM2G021567_P01, GRMZM2G171745_P02, GRMZM2G083689_P01, GRMZM2G012600_P01, …
GO:0017111	nucleoside-triphosphatase activity	MOLECULAR_FUNCTION	0.0309873	93	214	1567	4757	GRMZM2G069458_P01, GRMZM2G056569_P01, GRMZM2G315375_P01, GRMZM2G109121_P02, GRMZM2G071790_P05, GRMZM2G071071_P01, GRMZM2G163325_P01, GRMZM2G038126_P01, GRMZM2G157564_P02, GRMZM2G029506_P01, GRMZM2G110185_P02, GRMZM2G077632_P01, GRMZM2G029859_P01, GRMZM2G156068_P01, GRMZM2G171604_P01, GRMZM2G038494_P01, AC194970.5_FGP009, GRMZM2G032267_P01, GRMZM2G321725_P02, GRMZM2G164835_P01, GRMZM2G077662_P02, …
GO:0046907	intracellular transport	BIOLOGICAL_PROCESS	0.0424774	92	214	1568	4757	GRMZM2G012501_P01, GRMZM2G361220_P01, GRMZM2G028929_P02, GRMZM2G084767_P01, GRMZM2G064212_P02, GRMZM2G038313_P01, GRMZM2G159777_P01, GRMZM2G106960_P01, GRMZM2G107588_P01, GRMZM2G107571_P01, GRMZM2G098674_P01, GRMZM2G127756_P01, GRMZM2G097568_P01, GRMZM2G000710_P01, GRMZM2G330772_P02, GRMZM2G078933_P01, GRMZM2G022876_P01, GRMZM2G027741_P02, GRMZM2G086636_P01, GRMZM2G050501_P01, GRMZM2G012600_P01, …
GO:0005975	carbohydrate metabolic process	BIOLOGICAL_PROCESS	4.91551e-07	89	454	1571	4517	GRMZM2G124820_P01, GRMZM2G178602_P01, GRMZM2G162286_P01, GRMZM2G031057_P01, GRMZM2G013811_P01, GRMZM2G064212_P02, GRMZM2G177947_P01, GRMZM2G134256_P01, GRMZM2G006565_P01, GRMZM2G087326_P01, GRMZM2G158662_P01, GRMZM2G066024_P01, GRMZM2G145715_P01, GRMZM2G466780_P01, GRMZM2G130230_P03, GRMZM2G165390_P01, GRMZM2G168364_P01, GRMZM2G051677_P01, GRMZM2G159369_P01, GRMZM2G161245_P02, GRMZM2G128171_P03, …
GO:0034660	ncRNA metabolic process	BIOLOGICAL_PROCESS	4.75029e-06	85	133	1575	4838	GRMZM2G377797_P01, GRMZM5G868062_P04, GRMZM2G012404_P01, GRMZM2G171426_P01, GRMZM2G438239_P01, GRMZM2G054136_P09, GRMZM2G032049_P01, GRMZM5G871297_P01, GRMZM2G135654_P01, GRMZM2G076950_P01, GRMZM2G049342_P01, GRMZM2G077632_P01, GRMZM2G146589_P04, GRMZM2G050501_P01, GRMZM2G083689_P01, GRMZM2G091383_P01, GRMZM5G821551_P03, GRMZM2G178807_P01, GRMZM2G177970_P01, GRMZM2G150648_P03, GRMZM2G035820_P01, …
GO:0046914	transition metal ion binding	MOLECULAR_FUNCTION	9.21071e-06	84	411	1576	4560	GRMZM2G133249_P01, GRMZM2G025078_P01, GRMZM2G069458_P01, GRMZM2G140342_P01, GRMZM2G000753_P01, GRMZM2G062396_P01, GRMZM2G139874_P01, GRMZM2G033098_P01, GRMZM2G130127_P01, GRMZM2G076950_P01, GRMZM2G078500_P01, GRMZM2G143202_P01, GRMZM2G126285_P02, GRMZM2G029859_P01, GRMZM2G000166_P01, GRMZM2G132000_P03, GRMZM2G038487_P03, GRMZM2G076985_P01, GRMZM2G018241_P01, GRMZM2G156068_P01, GRMZM5G899349_P02, …
GO:0022613	ribonucleoprotein complex biogenesis	BIOLOGICAL_PROCESS	2.47621e-09	81	98	1579	4873	GRMZM2G076399_P01, GRMZM2G422651_P01, GRMZM2G377797_P01, GRMZM5G868062_P04, GRMZM2G102075_P01, GRMZM2G171426_P01, GRMZM2G054136_P09, GRMZM2G038313_P01, GRMZM2G135654_P01, GRMZM2G168330_P02, GRMZM2G049342_P01, GRMZM2G024647_P01, GRMZM2G077632_P01, GRMZM2G356894_P01, GRMZM2G050501_P01, GRMZM2G091383_P01, GRMZM2G327564_P01, GRMZM2G100120_P06, GRMZM2G078985_P01, GRMZM2G178807_P01, GRMZM2G150648_P03, …
GO:0010033	response to organic substance	BIOLOGICAL_PROCESS	0.00939087	81	171	1579	4800	GRMZM2G463464_P02, GRMZM2G025387_P01, GRMZM2G103236_P01, GRMZM2G462803_P02, GRMZM2G058276_P01, GRMZM2G056569_P01, GRMZM2G315375_P01, GRMZM2G038313_P01, GRMZM2G107588_P01, AC155496.2_FGP009, GRMZM2G063262_P01, GRMZM2G008273_P01, GRMZM2G162413_P02, GRMZM2G062396_P01, GRMZM2G145715_P01, GRMZM2G033098_P01, GRMZM2G168706_P04, GRMZM2G038126_P01, GRMZM2G110185_P02, GRMZM2G070323_P01, GRMZM2G083689_P01, …
GO:0008610	lipid biosynthetic process	BIOLOGICAL_PROCESS	0.00285639	80	158	1580	4813	GRMZM2G178602_P01, GRMZM2G012404_P01, GRMZM2G112728_P04, GRMZM2G178192_P03, AC204530.4_FGP002, GRMZM2G158662_P01, GRMZM2G033098_P01, GRMZM2G076950_P01, GRMZM2G004131_P01, GRMZM2G049342_P01, GRMZM2G078569_P03, GRMZM2G168898_P01, GRMZM2G170868_P01, GRMZM2G396451_P02, GRMZM2G149224_P01, GRMZM2G098569_P01, GRMZM2G394403_P01, GRMZM2G023652_P01, GRMZM5G899349_P02, GRMZM2G180399_P01, GRMZM2G158024_P02, …
GO:0044265	cellular macromolecule catabolic process	BIOLOGICAL_PROCESS	0.0369382	77	173	1583	4798	GRMZM2G133249_P01, GRMZM2G056569_P01, GRMZM2G038313_P01, GRMZM2G119761_P01, AC155496.2_FGP009, GRMZM2G008273_P01, GRMZM2G078933_P01, GRMZM2G038126_P01, GRMZM2G110185_P02, GRMZM2G017789_P01, GRMZM2G156068_P01, GRMZM5G864266_P01, GRMZM2G171604_P01, GRMZM2G094388_P01, GRMZM2G028346_P01, GRMZM2G016097_P01, GRMZM2G095969_P02, GRMZM2G033626_P02, GRMZM2G061745_P01, GRMZM2G158789_P01, GRMZM2G018508_P01, …
GO:0019693	ribose phosphate metabolic process	BIOLOGICAL_PROCESS	0.0441673	76	173	1584	4798	GRMZM2G100084_P01, GRMZM2G115621_P01, GRMZM2G069458_P01, GRMZM2G177947_P01, GRMZM2G134256_P01, GRMZM2G066024_P01, GRMZM2G109731_P01, GRMZM2G145715_P01, GRMZM2G130230_P03, GRMZM2G135132_P01, GRMZM2G021567_P01, GRMZM2G169462_P01, GRMZM2G396451_P02, GRMZM2G159369_P01, GRMZM2G128171_P03, GRMZM2G156068_P01, GRMZM2G059151_P01, GRMZM2G035338_P02, GRMZM2G018728_P01, GRMZM2G127798_P01, GRMZM2G033626_P02, …
GO:0009791	post-embryonic development	BIOLOGICAL_PROCESS	0.0262837	74	162	1586	4809	GRMZM2G025078_P01, GRMZM2G012404_P01, GRMZM2G015861_P02, GRMZM2G315375_P01, GRMZM2G038313_P01, AC204530.4_FGP002, GRMZM2G107588_P01, AC155496.2_FGP009, GRMZM2G008273_P01, GRMZM2G020034_P01, GRMZM2G036829_P01, GRMZM2G327394_P01, GRMZM2G049342_P01, GRMZM2G014720_P01, GRMZM2G077632_P01, GRMZM2G021567_P01, GRMZM2G171745_P02, GRMZM2G083689_P01, GRMZM2G012600_P01, GRMZM2G341621_P01, GRMZM2G177970_P01, …
GO:0016192	vesicle-mediated transport	BIOLOGICAL_PROCESS	0.00039015	71	124	1589	4847	GRMZM2G012501_P01, GRMZM2G387076_P02, GRMZM2G462803_P02, GRMZM2G162286_P01, GRMZM2G361220_P01, GRMZM2G028929_P02, GRMZM2G008095_P01, GRMZM2G106960_P01, GRMZM2G107757_P02, GRMZM2G127756_P01, GRMZM2G097568_P01, GRMZM2G330772_P02, GRMZM5G846196_P01, GRMZM2G022876_P01, GRMZM2G327394_P01, GRMZM2G103579_P01, GRMZM2G086636_P01, GRMZM2G012600_P01, GRMZM2G107968_P01, GRMZM2G102903_P02, GRMZM2G006474_P01, …
GO:0051603	proteolysis involved in cellular protein catabolic process	BIOLOGICAL_PROCESS	0.0131914	66	136	1594	4835	GRMZM2G133249_P01, GRMZM2G056569_P01, GRMZM2G038313_P01, GRMZM2G119761_P01, AC155496.2_FGP009, GRMZM2G008273_P01, GRMZM2G078933_P01, GRMZM2G038126_P01, GRMZM2G110185_P02, GRMZM2G017789_P01, GRMZM2G156068_P01, GRMZM5G864266_P01, GRMZM2G171604_P01, GRMZM2G094388_P01, GRMZM2G028346_P01, GRMZM2G033626_P02, GRMZM2G061745_P01, GRMZM2G018508_P01, GRMZM2G445100_P02, GRMZM2G108739_P01, GRMZM2G093557_P01, …
GO:0044257	cellular protein catabolic process	BIOLOGICAL_PROCESS	0.0278502	66	142	1594	4829	GRMZM2G133249_P01, GRMZM2G056569_P01, GRMZM2G038313_P01, GRMZM2G119761_P01, AC155496.2_FGP009, GRMZM2G008273_P01, GRMZM2G078933_P01, GRMZM2G038126_P01, GRMZM2G110185_P02, GRMZM2G017789_P01, GRMZM2G156068_P01, GRMZM5G864266_P01, GRMZM2G171604_P01, GRMZM2G094388_P01, GRMZM2G028346_P01, GRMZM2G033626_P02, GRMZM2G061745_P01, GRMZM2G018508_P01, GRMZM2G445100_P02, GRMZM2G108739_P01, GRMZM2G093557_P01, …
GO:0055085	transmembrane transport	BIOLOGICAL_PROCESS	0.00807672	64	273	1596	4698	GRMZM2G177912_P01, GRMZM2G025387_P01, GRMZM2G069458_P01, GRMZM2G148200_P01, GRMZM2G315375_P01, GRMZM2G159777_P01, GRMZM2G022248_P01, GRMZM2G178192_P03, GRMZM2G157564_P02, AC209208.3_FGP002, GRMZM2G029506_P01, GRMZM2G007441_P01, GRMZM2G156068_P01, GRMZM2G035651_P01, GRMZM2G015571_P01, GRMZM2G023194_P01, GRMZM2G149428_P01, GRMZM2G321725_P02, GRMZM2G050089_P02, GRMZM2G017647_P01, GRMZM2G135186_P03, …
GO:0016887	ATPase activity	MOLECULAR_FUNCTION	0.0300596	63	135	1597	4836	GRMZM2G069458_P01, GRMZM2G056569_P01, GRMZM2G315375_P01, GRMZM2G109121_P02, GRMZM2G038126_P01, GRMZM2G157564_P02, GRMZM2G029506_P01, GRMZM2G110185_P02, GRMZM2G156068_P01, GRMZM2G171604_P01, GRMZM2G038494_P01, AC194970.5_FGP009, GRMZM2G032267_P01, GRMZM2G321725_P02, GRMZM2G117763_P01, GRMZM2G059026_P01, GRMZM5G893343_P01, GRMZM2G474658_P01, GRMZM2G009464_P01, GRMZM2G000823_P01, AC199782.5_FGP001, …
GO:0042254	ribosome biogenesis	BIOLOGICAL_PROCESS	1.66918e-08	62	68	1598	4903	GRMZM2G377797_P01, GRMZM5G868062_P04, GRMZM2G102075_P01, GRMZM2G171426_P01, GRMZM2G054136_P09, GRMZM2G135654_P01, GRMZM2G168330_P02, GRMZM2G049342_P01, GRMZM2G024647_P01, GRMZM2G077632_P01, GRMZM2G050501_P01, GRMZM2G091383_P01, GRMZM2G327564_P01, GRMZM2G078985_P01, GRMZM2G178807_P01, GRMZM2G150648_P03, GRMZM2G163081_P01, GRMZM2G030016_P02, GRMZM2G158789_P01, GRMZM2G093574_P02, GRMZM2G074898_P01, …
GO:0140098	catalytic activity, acting on RNA	MOLECULAR_FUNCTION	0.0284523	62	132	1598	4839	GRMZM5G800853_P01, GRMZM2G012404_P01, GRMZM2G438239_P01, GRMZM2G032049_P01, GRMZM2G445057_P03, GRMZM5G871297_P01, GRMZM5G899366_P01, GRMZM2G050596_P01, GRMZM2G144635_P01, GRMZM2G146589_P04, GRMZM5G821551_P03, GRMZM2G080176_P01, GRMZM2G177970_P01, GRMZM2G150648_P03, GRMZM5G879235_P01, GRMZM2G035820_P01, GRMZM2G019597_P02, GRMZM2G383404_P01, GRMZM2G172101_P03, GRMZM2G386714_P01, GRMZM5G874500_P02, …
GO:0019941	modification-dependent protein catabolic process	BIOLOGICAL_PROCESS	2.02721e-05	61	88	1599	4883	GRMZM2G056569_P01, GRMZM2G038313_P01, GRMZM2G119761_P01, AC155496.2_FGP009, GRMZM2G008273_P01, GRMZM2G078933_P01, GRMZM2G038126_P01, GRMZM2G110185_P02, GRMZM2G017789_P01, GRMZM2G156068_P01, GRMZM5G864266_P01, GRMZM2G171604_P01, GRMZM2G094388_P01, GRMZM2G028346_P01, GRMZM2G033626_P02, GRMZM2G061745_P01, GRMZM2G018508_P01, GRMZM2G445100_P02, GRMZM2G108739_P01, GRMZM2G093557_P01, GRMZM2G114220_P02, …
GO:0043632	modification-dependent macromolecule catabolic process	BIOLOGICAL_PROCESS	3.82827e-05	61	91	1599	4880	GRMZM2G056569_P01, GRMZM2G038313_P01, GRMZM2G119761_P01, AC155496.2_FGP009, GRMZM2G008273_P01, GRMZM2G078933_P01, GRMZM2G038126_P01, GRMZM2G110185_P02, GRMZM2G017789_P01, GRMZM2G156068_P01, GRMZM5G864266_P01, GRMZM2G171604_P01, GRMZM2G094388_P01, GRMZM2G028346_P01, GRMZM2G033626_P02, GRMZM2G061745_P01, GRMZM2G018508_P01, GRMZM2G445100_P02, GRMZM2G108739_P01, GRMZM2G093557_P01, GRMZM2G114220_P02, …
GO:0006511	ubiquitin-dependent protein catabolic process	BIOLOGICAL_PROCESS	9.65424e-06	60	84	1600	4887	GRMZM2G056569_P01, GRMZM2G038313_P01, GRMZM2G119761_P01, AC155496.2_FGP009, GRMZM2G008273_P01, GRMZM2G078933_P01, GRMZM2G038126_P01, GRMZM2G110185_P02, GRMZM2G017789_P01, GRMZM2G156068_P01, GRMZM5G864266_P01, GRMZM2G171604_P01, GRMZM2G094388_P01, GRMZM2G028346_P01, GRMZM2G033626_P02, GRMZM2G061745_P01, GRMZM2G018508_P01, GRMZM2G445100_P02, GRMZM2G108739_P01, GRMZM2G093557_P01, GRMZM2G114220_P02, …
GO:0032259	methylation	BIOLOGICAL_PROCESS	0.00727266	55	105	1605	4866	GRMZM2G078143_P01, GRMZM2G011456_P02, GRMZM2G008273_P01, GRMZM2G076950_P01, GRMZM2G140996_P01, GRMZM2G171745_P02, GRMZM2G050501_P01, GRMZM2G083689_P01, GRMZM2G077036_P01, GRMZM2G099729_P01, GRMZM2G150648_P03, GRMZM2G107968_P01, GRMZM5G899349_P02, GRMZM2G019597_P02, GRMZM2G152470_P01, GRMZM2G394528_P02, GRMZM2G349791_P01, GRMZM2G123527_P01, GRMZM2G142217_P01, GRMZM2G049269_P01, GRMZM2G011491_P01, …
GO:0009416	response to light stimulus	BIOLOGICAL_PROCESS	0.00826935	53	101	1607	4870	GRMZM2G129218_P01, GRMZM2G025078_P01, GRMZM2G315375_P01, GRMZM2G038313_P01, GRMZM2G107588_P01, AC155496.2_FGP009, GRMZM2G008273_P01, GRMZM2G162413_P02, GRMZM2G062396_P01, GRMZM2G153184_P01, GRMZM2G020034_P01, GRMZM2G038519_P01, GRMZM2G078569_P03, GRMZM2G021567_P01, GRMZM2G171745_P02, GRMZM2G083689_P01, GRMZM2G012600_P01, GRMZM2G021816_P01, GRMZM2G007441_P01, GRMZM2G157369_P01, GRMZM2G036880_P01, …
GO:0009314	response to radiation	BIOLOGICAL_PROCESS	0.0113749	53	103	1607	4868	GRMZM2G129218_P01, GRMZM2G025078_P01, GRMZM2G315375_P01, GRMZM2G038313_P01, GRMZM2G107588_P01, AC155496.2_FGP009, GRMZM2G008273_P01, GRMZM2G162413_P02, GRMZM2G062396_P01, GRMZM2G153184_P01, GRMZM2G020034_P01, GRMZM2G038519_P01, GRMZM2G078569_P03, GRMZM2G021567_P01, GRMZM2G171745_P02, GRMZM2G083689_P01, GRMZM2G012600_P01, GRMZM2G021816_P01, GRMZM2G007441_P01, GRMZM2G157369_P01, GRMZM2G036880_P01, …
GO:0048518	positive regulation of biological process	BIOLOGICAL_PROCESS	0.0198645	52	105	1608	4866	GRMZM2G129218_P01, GRMZM2G056569_P01, GRMZM2G038313_P01, GRMZM2G382106_P01, GRMZM2G175272_P01, AC204530.4_FGP002, GRMZM2G008273_P01, GRMZM2G162413_P02, GRMZM2G032315_P01, GRMZM2G091419_P01, GRMZM2G078933_P01, GRMZM2G036829_P01, GRMZM2G049342_P01, GRMZM2G038126_P01, GRMZM2G110185_P02, GRMZM2G171745_P02, GRMZM2G342386_P02, GRMZM2G141707_P01, GRMZM2G394403_P01, GRMZM2G171604_P01, GRMZM2G094388_P01, …
GO:0008270	zinc ion binding	MOLECULAR_FUNCTION	6.84634e-05	51	269	1609	4702	GRMZM2G133249_P01, GRMZM2G069458_P01, GRMZM2G140342_P01, GRMZM2G000753_P01, GRMZM2G130127_P01, GRMZM2G076950_P01, GRMZM2G078500_P01, GRMZM2G126285_P02, GRMZM2G029859_P01, GRMZM2G132000_P03, GRMZM2G018241_P01, GRMZM2G156068_P01, GRMZM2G307906_P01, GRMZM2G152470_P01, GRMZM2G321725_P02, GRMZM2G440349_P01, GRMZM2G111579_P01, GRMZM2G129783_P01, GRMZM2G137139_P01, GRMZM2G361074_P01, GRMZM2G060373_P03, …
GO:0001882	nucleoside binding	MOLECULAR_FUNCTION	0.0129626	51	99	1609	4872	GRMZM2G113613_P01, GRMZM2G159777_P01, GRMZM2G106960_P01, GRMZM2G171060_P02, GRMZM2G071790_P05, GRMZM2G071071_P01, GRMZM2G122805_P01, GRMZM2G163325_P01, GRMZM2G077632_P01, GRMZM2G086636_P01, GRMZM2G101938_P01, GRMZM2G029859_P01, GRMZM2G069726_P01, GRMZM2G061912_P01, GRMZM2G020661_P01, GRMZM2G158024_P02, GRMZM2G038494_P01, GRMZM2G077662_P02, GRMZM2G473906_P05, GRMZM2G311961_P01, GRMZM2G314647_P01, …
GO:0032549	ribonucleoside binding	MOLECULAR_FUNCTION	0.0129626	51	99	1609	4872	GRMZM2G113613_P01, GRMZM2G159777_P01, GRMZM2G106960_P01, GRMZM2G171060_P02, GRMZM2G071790_P05, GRMZM2G071071_P01, GRMZM2G122805_P01, GRMZM2G163325_P01, GRMZM2G077632_P01, GRMZM2G086636_P01, GRMZM2G101938_P01, GRMZM2G029859_P01, GRMZM2G069726_P01, GRMZM2G061912_P01, GRMZM2G020661_P01, GRMZM2G158024_P02, GRMZM2G038494_P01, GRMZM2G077662_P02, GRMZM2G473906_P05, GRMZM2G311961_P01, GRMZM2G314647_P01, …
GO:0019001	guanyl nucleotide binding	MOLECULAR_FUNCTION	0.0156625	50	97	1610	4874	GRMZM2G113613_P01, GRMZM2G159777_P01, GRMZM2G106960_P01, GRMZM2G171060_P02, GRMZM2G071790_P05, GRMZM2G071071_P01, GRMZM2G122805_P01, GRMZM2G163325_P01, GRMZM2G077632_P01, GRMZM2G086636_P01, GRMZM2G101938_P01, GRMZM2G029859_P01, GRMZM2G069726_P01, GRMZM2G061912_P01, GRMZM2G020661_P01, GRMZM2G158024_P02, GRMZM2G038494_P01, GRMZM2G077662_P02, GRMZM2G473906_P05, GRMZM2G311961_P01, GRMZM2G314647_P01, …
GO:0001883	purine nucleoside binding	MOLECULAR_FUNCTION	0.0156625	50	97	1610	4874	GRMZM2G113613_P01, GRMZM2G159777_P01, GRMZM2G106960_P01, GRMZM2G171060_P02, GRMZM2G071790_P05, GRMZM2G071071_P01, GRMZM2G122805_P01, GRMZM2G163325_P01, GRMZM2G077632_P01, GRMZM2G086636_P01, GRMZM2G101938_P01, GRMZM2G029859_P01, GRMZM2G069726_P01, GRMZM2G061912_P01, GRMZM2G020661_P01, GRMZM2G158024_P02, GRMZM2G038494_P01, GRMZM2G077662_P02, GRMZM2G473906_P05, GRMZM2G311961_P01, GRMZM2G314647_P01, …
GO:0032561	guanyl ribonucleotide binding	MOLECULAR_FUNCTION	0.0156625	50	97	1610	4874	GRMZM2G113613_P01, GRMZM2G159777_P01, GRMZM2G106960_P01, GRMZM2G171060_P02, GRMZM2G071790_P05, GRMZM2G071071_P01, GRMZM2G122805_P01, GRMZM2G163325_P01, GRMZM2G077632_P01, GRMZM2G086636_P01, GRMZM2G101938_P01, GRMZM2G029859_P01, GRMZM2G069726_P01, GRMZM2G061912_P01, GRMZM2G020661_P01, GRMZM2G158024_P02, GRMZM2G038494_P01, GRMZM2G077662_P02, GRMZM2G473906_P05, GRMZM2G311961_P01, GRMZM2G314647_P01, …
GO:0032550	purine ribonucleoside binding	MOLECULAR_FUNCTION	0.0156625	50	97	1610	4874	GRMZM2G113613_P01, GRMZM2G159777_P01, GRMZM2G106960_P01, GRMZM2G171060_P02, GRMZM2G071790_P05, GRMZM2G071071_P01, GRMZM2G122805_P01, GRMZM2G163325_P01, GRMZM2G077632_P01, GRMZM2G086636_P01, GRMZM2G101938_P01, GRMZM2G029859_P01, GRMZM2G069726_P01, GRMZM2G061912_P01, GRMZM2G020661_P01, GRMZM2G158024_P02, GRMZM2G038494_P01, GRMZM2G077662_P02, GRMZM2G473906_P05, GRMZM2G311961_P01, GRMZM2G314647_P01, …
GO:0005525	GTP binding	MOLECULAR_FUNCTION	0.0156625	50	97	1610	4874	GRMZM2G113613_P01, GRMZM2G159777_P01, GRMZM2G106960_P01, GRMZM2G171060_P02, GRMZM2G071790_P05, GRMZM2G071071_P01, GRMZM2G122805_P01, GRMZM2G163325_P01, GRMZM2G077632_P01, GRMZM2G086636_P01, GRMZM2G101938_P01, GRMZM2G029859_P01, GRMZM2G069726_P01, GRMZM2G061912_P01, GRMZM2G020661_P01, GRMZM2G158024_P02, GRMZM2G038494_P01, GRMZM2G077662_P02, GRMZM2G473906_P05, GRMZM2G311961_P01, GRMZM2G314647_P01, …
GO:0034470	ncRNA processing	BIOLOGICAL_PROCESS	0.000137442	48	69	1612	4902	GRMZM2G377797_P01, GRMZM5G868062_P04, GRMZM2G171426_P01, GRMZM2G018947_P01, GRMZM2G438239_P01, GRMZM2G054136_P09, GRMZM2G069762_P01, GRMZM2G023748_P01, GRMZM2G135654_P01, GRMZM2G049342_P01, GRMZM2G080129_P01, GRMZM2G100225_P01, GRMZM2G077632_P01, GRMZM2G144387_P03, GRMZM2G050501_P01, GRMZM2G083689_P01, GRMZM2G091383_P01, GRMZM2G119933_P01, GRMZM2G178807_P01, GRMZM2G150648_P03, GRMZM2G094074_P02, …
GO:0051246	regulation of protein metabolic process	BIOLOGICAL_PROCESS	0.0318406	47	96	1613	4875	GRMZM2G082962_P01, GRMZM2G422651_P01, GRMZM2G064640_P01, GRMZM2G033493_P01, GRMZM2G056569_P01, GRMZM2G092627_P01, GRMZM2G038313_P01, GRMZM2G336815_P01, GRMZM2G119761_P01, GRMZM2G174170_P02, GRMZM2G032505_P03, GRMZM2G058407_P01, GRMZM2G175272_P01, GRMZM2G032315_P01, GRMZM2G148106_P01, GRMZM2G038126_P01, GRMZM2G110185_P02, GRMZM2G100120_P06, GRMZM2G394403_P01, GRMZM2G107362_P02, GRMZM2G139123_P01, …
GO:0048522	positive regulation of cellular process	BIOLOGICAL_PROCESS	0.0204485	46	89	1614	4882	GRMZM2G032336_P01, GRMZM2G064640_P01, GRMZM2G033493_P01, GRMZM2G056569_P01, GRMZM2G092627_P01, GRMZM2G038313_P01, GRMZM2G032505_P03, GRMZM2G382106_P01, GRMZM2G175272_P01, AC204530.4_FGP002, GRMZM2G096092_P01, GRMZM2G008273_P01, GRMZM2G032315_P01, GRMZM2G168629_P01, GRMZM2G091419_P01, GRMZM2G078933_P01, GRMZM2G148106_P01, GRMZM2G036829_P01, GRMZM2G049342_P01, GRMZM2G038126_P01, GRMZM2G110185_P02, …
GO:0016741	transferase activity, transferring one-carbon groups	MOLECULAR_FUNCTION	0.0204485	46	89	1614	4882	GRMZM2G078143_P01, GRMZM2G114706_P01, GRMZM2G127948_P01, GRMZM2G035042_P01, GRMZM2G011456_P02, GRMZM2G082683_P01, GRMZM2G076950_P01, GRMZM2G112149_P02, GRMZM5G807767_P03, GRMZM2G080380_P01, GRMZM2G140996_P01, GRMZM2G161673_P01, GRMZM2G077036_P01, GRMZM2G099729_P01, GRMZM2G119933_P01, GRMZM2G085924_P01, GRMZM2G150648_P03, GRMZM2G107968_P01, GRMZM2G005886_P01, GRMZM5G899349_P02, GRMZM2G347808_P01, …
GO:0032268	regulation of cellular protein metabolic process	BIOLOGICAL_PROCESS	0.0351893	45	91	1615	4880	GRMZM2G082962_P01, GRMZM2G422651_P01, GRMZM2G064640_P01, GRMZM2G033493_P01, GRMZM2G056569_P01, GRMZM2G092627_P01, GRMZM2G038313_P01, GRMZM2G336815_P01, GRMZM2G174170_P02, GRMZM2G032505_P03, GRMZM2G058407_P01, GRMZM2G175272_P01, GRMZM2G032315_P01, GRMZM2G148106_P01, GRMZM2G038126_P01, GRMZM2G110185_P02, GRMZM2G100120_P06, GRMZM2G394403_P01, GRMZM2G107362_P02, GRMZM2G139123_P01, GRMZM2G171604_P01, …
GO:0006811	ion transport	BIOLOGICAL_PROCESS	0.00467042	44	207	1616	4764	GRMZM2G030167_P01, GRMZM2G177912_P01, GRMZM2G150201_P03, GRMZM2G701207_P01, GRMZM2G025387_P01, GRMZM2G069458_P01, GRMZM2G148200_P01, GRMZM2G356938_P01, GRMZM2G022248_P01, GRMZM2G048907_P01, GRMZM2G178192_P03, GRMZM2G026391_P02, GRMZM2G060870_P02, AC209208.3_FGP002, GRMZM5G825759_P01, GRMZM2G000166_P01, GRMZM2G428096_P01, GRMZM5G879240_P01, AC194341.4_FGP002, GRMZM5G816772_P01, GRMZM2G156068_P01, …
GO:0070887	cellular response to chemical stimulus	BIOLOGICAL_PROCESS	0.0363491	44	186	1616	4785	GRMZM2G463464_P02, GRMZM2G025387_P01, GRMZM2G462803_P02, GRMZM2G424053_P02, GRMZM2G033493_P01, GRMZM2G315375_P01, GRMZM2G038313_P01, GRMZM2G139680_P01, GRMZM2G041765_P01, AC155496.2_FGP009, GRMZM2G063262_P01, GRMZM2G008273_P01, GRMZM2G162413_P02, GRMZM2G168629_P01, GRMZM2G460406_P01, GRMZM2G168706_P04, GRMZM2G112057_P01, GRMZM5G843368_P01, GRMZM2G070323_P01, GRMZM2G124455_P01, GRMZM2G083689_P01, …
GO:0022857	transmembrane transporter activity	MOLECULAR_FUNCTION	0.00288287	43	208	1617	4763	GRMZM2G030167_P01, GRMZM2G177912_P01, GRMZM2G701207_P01, GRMZM2G318794_P01, GRMZM2G069458_P01, GRMZM2G148200_P01, GRMZM2G315375_P01, GRMZM2G356938_P01, GRMZM2G159777_P01, GRMZM2G022248_P01, GRMZM2G048907_P01, GRMZM2G157564_P02, AC209208.3_FGP002, GRMZM2G029506_P01, GRMZM2G079777_P01, GRMZM5G825759_P01, GRMZM2G428096_P01, GRMZM5G879240_P01, AC194341.4_FGP002, GRMZM5G816772_P01, GRMZM2G156068_P01, …
GO:0008168	methyltransferase activity	MOLECULAR_FUNCTION	0.021937	43	83	1617	4888	GRMZM2G078143_P01, GRMZM2G114706_P01, GRMZM2G127948_P01, GRMZM2G035042_P01, GRMZM2G011456_P02, GRMZM2G082683_P01, GRMZM2G076950_P01, GRMZM2G112149_P02, GRMZM5G807767_P03, GRMZM2G140996_P01, GRMZM2G161673_P01, GRMZM2G077036_P01, GRMZM2G099729_P01, GRMZM2G119933_P01, GRMZM2G085924_P01, GRMZM2G150648_P03, GRMZM2G107968_P01, GRMZM2G005886_P01, GRMZM5G899349_P02, GRMZM2G347808_P01, GRMZM2G019597_P02, …
GO:0016765	transferase activity, transferring alkyl or aryl (other than methyl) groups	MOLECULAR_FUNCTION	3.40694e-06	41	44	1619	4927	GRMZM2G133359_P01, GRMZM2G059580_P02, GRMZM2G162486_P01, GRMZM2G112728_P04, GRMZM2G428168_P01, GRMZM2G122871_P01, GRMZM2G005887_P01, GRMZM2G134582_P01, GRMZM2G004131_P01, GRMZM2G097989_P01, GRMZM2G117707_P02, GRMZM2G447632_P01, GRMZM2G308687_P01, GRMZM2G365160_P01, GRMZM2G029559_P02, GRMZM2G096247_P01, GRMZM2G146475_P01, GRMZM2G019090_P01, GRMZM2G098569_P01, GRMZM2G146246_P02, GRMZM2G116273_P01, …
GO:0016072	rRNA metabolic process	BIOLOGICAL_PROCESS	1.14699e-06	40	39	1620	4932	GRMZM2G377797_P01, GRMZM5G868062_P04, GRMZM2G171426_P01, GRMZM2G018947_P01, GRMZM2G054136_P09, GRMZM2G069762_P01, GRMZM2G023748_P01, GRMZM2G135654_P01, GRMZM2G049342_P01, GRMZM2G080129_P01, GRMZM2G100225_P01, GRMZM2G077632_P01, GRMZM2G144387_P03, GRMZM2G050501_P01, GRMZM2G091383_P01, GRMZM2G178807_P01, GRMZM2G150648_P03, GRMZM2G094074_P02, GRMZM2G043279_P01, GRMZM2G143246_P01, GRMZM2G362850_P01, …
GO:0006364	rRNA processing	BIOLOGICAL_PROCESS	2.07317e-06	39	39	1621	4932	GRMZM2G377797_P01, GRMZM5G868062_P04, GRMZM2G171426_P01, GRMZM2G018947_P01, GRMZM2G054136_P09, GRMZM2G069762_P01, GRMZM2G023748_P01, GRMZM2G135654_P01, GRMZM2G049342_P01, GRMZM2G080129_P01, GRMZM2G100225_P01, GRMZM2G077632_P01, GRMZM2G144387_P03, GRMZM2G050501_P01, GRMZM2G091383_P01, GRMZM2G178807_P01, GRMZM2G150648_P03, GRMZM2G094074_P02, GRMZM2G043279_P01, GRMZM2G143246_P01, GRMZM2G362850_P01, …
GO:0006399	tRNA metabolic process	BIOLOGICAL_PROCESS	0.0286113	39	75	1621	4896	GRMZM2G012404_P01, GRMZM2G438239_P01, GRMZM2G017671_P01, GRMZM2G032049_P01, GRMZM5G871297_P01, GRMZM2G117870_P01, GRMZM2G076950_P01, GRMZM2G146589_P04, GRMZM2G094123_P01, GRMZM5G821551_P03, GRMZM2G057491_P01, GRMZM2G119933_P01, GRMZM2G029055_P01, GRMZM2G177970_P01, GRMZM2G150648_P03, GRMZM2G141707_P01, GRMZM2G155899_P01, GRMZM2G158228_P01, GRMZM2G019597_P02, AC233922.1_FGP004, GRMZM2G002687_P01, …
GO:0019748	secondary metabolic process	BIOLOGICAL_PROCESS	0.024498	37	70	1623	4901	GRMZM2G117642_P02, GRMZM2G138074_P01, GRMZM2G054013_P02, GRMZM2G127948_P01, GRMZM2G134256_P01, GRMZM2G428168_P01, GRMZM2G441347_P01, GRMZM2G139874_P01, GRMZM2G004131_P01, GRMZM2G097989_P01, GRMZM2G480516_P01, GRMZM2G160541_P02, GRMZM2G447632_P01, GRMZM2G140915_P01, GRMZM2G308687_P01, GRMZM2G055320_P01, GRMZM2G146475_P01, GRMZM2G140817_P01, GRMZM2G475059_P01, AC196475.3_FGP004, GRMZM2G335618_P01, …
GO:0009893	positive regulation of metabolic process	BIOLOGICAL_PROCESS	0.0450055	37	73	1623	4898	GRMZM2G032336_P01, GRMZM2G064640_P01, GRMZM2G033493_P01, GRMZM2G056569_P01, GRMZM2G092627_P01, GRMZM2G038313_P01, GRMZM2G032505_P03, GRMZM2G382106_P01, GRMZM2G175272_P01, GRMZM2G008273_P01, GRMZM2G032315_P01, GRMZM2G091419_P01, GRMZM2G148106_P01, GRMZM2G036829_P01, GRMZM2G049342_P01, GRMZM2G038126_P01, GRMZM2G110185_P02, GRMZM2G171745_P02, GRMZM2G141707_P01, GRMZM2G394403_P01, GRMZM2G107362_P02, …
GO:0019899	enzyme binding	MOLECULAR_FUNCTION	0.000748002	37	52	1623	4919	GRMZM2G010362_P01, GRMZM2G151905_P03, GRMZM2G462803_P02, GRMZM2G082916_P01, GRMZM2G092627_P01, GRMZM2G084767_P01, GRMZM5G862131_P01, GRMZM2G175272_P01, AC155496.2_FGP009, GRMZM2G107571_P01, GRMZM2G078933_P01, GRMZM2G138419_P01, GRMZM2G376731_P01, GRMZM5G879240_P01, GRMZM2G022258_P01, GRMZM2G047214_P01, GRMZM2G006474_P01, GRMZM2G094388_P01, GRMZM2G066650_P01, GRMZM2G099056_P01, GRMZM2G052435_P03, …
GO:0005509	calcium ion binding	MOLECULAR_FUNCTION	0.0341421	37	72	1623	4899	GRMZM2G463464_P02, GRMZM2G113613_P01, GRMZM2G176840_P01, GRMZM2G150201_P03, GRMZM2G148323_P01, GRMZM2G025387_P01, GRMZM2G145905_P01, GRMZM2G009136_P01, GRMZM2G436986_P01, GRMZM2G430600_P02, GRMZM2G127948_P01, GRMZM2G145972_P02, GRMZM2G035557_P01, GRMZM2G064993_P01, GRMZM2G099207_P01, GRMZM2G061950_P01, GRMZM2G006790_P02, GRMZM2G071071_P01, GRMZM2G168706_P04, GRMZM2G112057_P01, GRMZM2G062425_P01, …
GO:0006575	cellular modified amino acid metabolic process	BIOLOGICAL_PROCESS	6.69687e-05	36	43	1624	4928	GRMZM2G078143_P01, GRMZM2G059580_P02, GRMZM2G162486_P01, GRMZM2G428168_P01, GRMZM2G122871_P01, GRMZM2G134582_P01, GRMZM2G097989_P01, GRMZM2G447632_P01, GRMZM2G308687_P01, GRMZM5G807835_P01, GRMZM2G029559_P02, GRMZM2G096247_P01, GRMZM2G146475_P01, GRMZM2G019090_P01, GRMZM2G146246_P02, GRMZM2G116273_P01, GRMZM2G096269_P01, GRMZM2G043291_P02, GRMZM2G475059_P01, GRMZM2G126763_P01, GRMZM2G135470_P01, …
GO:0031325	positive regulation of cellular metabolic process	BIOLOGICAL_PROCESS	0.0295395	36	68	1624	4903	GRMZM2G032336_P01, GRMZM2G064640_P01, GRMZM2G033493_P01, GRMZM2G056569_P01, GRMZM2G092627_P01, GRMZM2G038313_P01, GRMZM2G032505_P03, GRMZM2G382106_P01, GRMZM2G175272_P01, GRMZM2G008273_P01, GRMZM2G032315_P01, GRMZM2G091419_P01, GRMZM2G148106_P01, GRMZM2G036829_P01, GRMZM2G049342_P01, GRMZM2G038126_P01, GRMZM2G110185_P02, GRMZM2G171745_P02, GRMZM2G141707_P01, GRMZM2G394403_P01, GRMZM2G107362_P02, …
GO:0022618	ribonucleoprotein complex assembly	BIOLOGICAL_PROCESS	0.000233106	35	45	1625	4926	GRMZM2G076399_P01, GRMZM2G422651_P01, GRMZM2G102075_P01, GRMZM2G038313_P01, GRMZM2G086906_P01, GRMZM2G336815_P01, GRMZM2G069762_P01, GRMZM2G024647_P01, GRMZM2G060160_P01, GRMZM2G356894_P01, GRMZM2G100120_P06, GRMZM2G078985_P01, GRMZM2G094074_P02, GRMZM2G107654_P01, GRMZM2G163081_P01, GRMZM2G307906_P01, GRMZM2G073150_P01, GRMZM2G054201_P01, GRMZM2G064133_P01, GRMZM2G070487_P03, GRMZM2G043737_P01, …
GO:0071826	ribonucleoprotein complex subunit organization	BIOLOGICAL_PROCESS	0.000844477	35	49	1625	4922	GRMZM2G076399_P01, GRMZM2G422651_P01, GRMZM2G102075_P01, GRMZM2G038313_P01, GRMZM2G086906_P01, GRMZM2G336815_P01, GRMZM2G069762_P01, GRMZM2G024647_P01, GRMZM2G060160_P01, GRMZM2G356894_P01, GRMZM2G100120_P06, GRMZM2G078985_P01, GRMZM2G094074_P02, GRMZM2G107654_P01, GRMZM2G163081_P01, GRMZM2G307906_P01, GRMZM2G073150_P01, GRMZM2G054201_P01, GRMZM2G064133_P01, GRMZM2G070487_P03, GRMZM2G043737_P01, …
GO:0140101	catalytic activity, acting on a tRNA	MOLECULAR_FUNCTION	0.011654	35	60	1625	4911	GRMZM2G012404_P01, GRMZM2G168301_P01, GRMZM2G177412_P02, GRMZM2G017671_P01, GRMZM2G032049_P01, GRMZM5G871297_P01, GRMZM2G050596_P01, GRMZM2G117870_P01, GRMZM2G144635_P01, GRMZM2G146589_P04, GRMZM2G094123_P01, GRMZM5G821551_P03, GRMZM2G057491_P01, GRMZM2G029055_P01, GRMZM2G177970_P01, GRMZM2G020187_P01, GRMZM2G155899_P01, GRMZM2G158228_P01, GRMZM2G019597_P02, AC233922.1_FGP004, GRMZM2G002687_P01, …
GO:0034220	ion transmembrane transport	BIOLOGICAL_PROCESS	0.0165325	33	155	1627	4816	GRMZM2G030167_P01, GRMZM2G177912_P01, GRMZM2G701207_P01, GRMZM2G025387_P01, GRMZM2G069458_P01, GRMZM2G148200_P01, GRMZM2G356938_P01, GRMZM2G048907_P01, GRMZM2G178192_P03, AC209208.3_FGP002, GRMZM5G825759_P01, GRMZM2G428096_P01, GRMZM5G879240_P01, AC194341.4_FGP002, GRMZM5G816772_P01, GRMZM2G156068_P01, GRMZM2G052088_P01, GRMZM5G816015_P01, GRMZM2G023194_P01, GRMZM2G149428_P01, GRMZM2G008232_P01, …
GO:0051173	positive regulation of nitrogen compound metabolic process	BIOLOGICAL_PROCESS	0.0446099	33	64	1627	4907	GRMZM2G032336_P01, GRMZM2G064640_P01, GRMZM2G033493_P01, GRMZM2G056569_P01, GRMZM2G038313_P01, GRMZM2G032505_P03, GRMZM2G175272_P01, GRMZM2G008273_P01, GRMZM2G032315_P01, GRMZM2G091419_P01, GRMZM2G148106_P01, GRMZM2G036829_P01, GRMZM2G049342_P01, GRMZM2G038126_P01, GRMZM2G110185_P02, GRMZM2G171745_P02, GRMZM2G141707_P01, GRMZM2G394403_P01, GRMZM2G107362_P02, GRMZM2G171604_P01, GRMZM2G000623_P02, …
GO:0007049	cell cycle	BIOLOGICAL_PROCESS	0.0427985	33	63	1627	4908	GRMZM2G082962_P01, GRMZM2G022625_P02, GRMZM2G064212_P02, GRMZM2G096092_P01, AC155496.2_FGP009, GRMZM2G008273_P01, GRMZM2G168629_P01, GRMZM2G078933_P01, GRMZM2G049342_P01, GRMZM2G083689_P01, GRMZM2G029859_P01, GRMZM2G069726_P01, GRMZM2G071518_P01, GRMZM2G094388_P01, GRMZM5G878823_P02, GRMZM2G542994_P01, GRMZM2G029486_P01, GRMZM5G816015_P01, GRMZM2G139038_P01, GRMZM2G117746_P01, GRMZM2G457381_P01, …
GO:0010628	positive regulation of gene expression	BIOLOGICAL_PROCESS	0.0146481	31	52	1629	4919	GRMZM2G032336_P01, GRMZM2G064640_P01, GRMZM2G033493_P01, GRMZM2G056569_P01, GRMZM2G038313_P01, GRMZM2G032505_P03, GRMZM2G008273_P01, GRMZM2G091419_P01, GRMZM2G148106_P01, GRMZM2G049342_P01, GRMZM2G038126_P01, GRMZM2G110185_P02, GRMZM2G171745_P02, GRMZM2G141707_P01, GRMZM2G394403_P01, GRMZM2G107362_P02, GRMZM2G171604_P01, GRMZM2G000623_P02, GRMZM2G158024_P02, GRMZM2G108348_P03, GRMZM2G128665_P01, …
GO:0006749	glutathione metabolic process	BIOLOGICAL_PROCESS	1.50342e-07	30	20	1630	4951	GRMZM2G059580_P02, GRMZM2G162486_P01, GRMZM2G428168_P01, GRMZM2G122871_P01, GRMZM2G134582_P01, GRMZM2G097989_P01, GRMZM2G447632_P01, GRMZM2G308687_P01, GRMZM2G029559_P02, GRMZM2G096247_P01, GRMZM2G146475_P01, GRMZM2G019090_P01, GRMZM2G146246_P02, GRMZM2G116273_P01, GRMZM2G096269_P01, GRMZM2G043291_P02, GRMZM2G475059_P01, GRMZM2G126763_P01, GRMZM2G335618_P01, GRMZM2G330635_P01, GRMZM2G416632_P01, …
GO:0010608	posttranscriptional regulation of gene expression	BIOLOGICAL_PROCESS	0.0217886	30	53	1630	4918	GRMZM2G422651_P01, GRMZM2G064640_P01, GRMZM2G033493_P01, GRMZM2G092627_P01, GRMZM2G038313_P01, GRMZM2G336815_P01, GRMZM2G003853_P01, GRMZM2G058407_P01, GRMZM2G083689_P01, GRMZM2G100120_P06, GRMZM2G444034_P01, GRMZM2G035820_P01, GRMZM5G816015_P01, GRMZM2G064133_P01, GRMZM2G024686_P01, GRMZM2G070487_P03, GRMZM2G028834_P03, GRMZM2G025214_P02, GRMZM2G108348_P03, GRMZM2G128665_P01, GRMZM5G832108_P01, …
GO:0031328	positive regulation of cellular biosynthetic process	BIOLOGICAL_PROCESS	0.0321238	30	55	1630	4916	GRMZM2G032336_P01, GRMZM2G064640_P01, GRMZM2G033493_P01, GRMZM2G056569_P01, GRMZM2G038313_P01, GRMZM2G032505_P03, GRMZM2G008273_P01, GRMZM2G091419_P01, GRMZM2G148106_P01, GRMZM2G036829_P01, GRMZM2G049342_P01, GRMZM2G038126_P01, GRMZM2G110185_P02, GRMZM2G171745_P02, GRMZM2G141707_P01, GRMZM2G394403_P01, GRMZM2G107362_P02, GRMZM2G171604_P01, GRMZM2G000623_P02, GRMZM2G158024_P02, GRMZM2G108348_P03, …
GO:0009891	positive regulation of biosynthetic process	BIOLOGICAL_PROCESS	0.0321238	30	55	1630	4916	GRMZM2G032336_P01, GRMZM2G064640_P01, GRMZM2G033493_P01, GRMZM2G056569_P01, GRMZM2G038313_P01, GRMZM2G032505_P03, GRMZM2G008273_P01, GRMZM2G091419_P01, GRMZM2G148106_P01, GRMZM2G036829_P01, GRMZM2G049342_P01, GRMZM2G038126_P01, GRMZM2G110185_P02, GRMZM2G171745_P02, GRMZM2G141707_P01, GRMZM2G394403_P01, GRMZM2G107362_P02, GRMZM2G171604_P01, GRMZM2G000623_P02, GRMZM2G158024_P02, GRMZM2G108348_P03, …
GO:0016051	carbohydrate biosynthetic process	BIOLOGICAL_PROCESS	0.0284989	29	136	1631	4835	GRMZM2G480620_P01, GRMZM2G117642_P02, GRMZM2G162286_P01, GRMZM2G052610_P01, GRMZM2G031057_P01, GRMZM2G436986_P01, GRMZM2G173341_P03, GRMZM2G087326_P01, GRMZM2G158662_P01, GRMZM2G111642_P01, GRMZM2G445905_P03, GRMZM2G076075_P02, GRMZM2G051677_P01, GRMZM2G159369_P01, GRMZM2G128171_P03, GRMZM2G018241_P01, GRMZM2G027723_P01, GRMZM2G110145_P01, GRMZM2G034575_P01, GRMZM2G077662_P02, GRMZM2G059212_P01, …
GO:0004364	glutathione transferase activity	MOLECULAR_FUNCTION	2.21743e-09	29	13	1631	4958	GRMZM2G059580_P02, GRMZM2G162486_P01, GRMZM2G428168_P01, GRMZM2G122871_P01, GRMZM2G134582_P01, GRMZM2G097989_P01, GRMZM2G447632_P01, GRMZM2G308687_P01, GRMZM2G029559_P02, GRMZM2G096247_P01, GRMZM2G146475_P01, GRMZM2G019090_P01, GRMZM2G146246_P02, GRMZM2G116273_P01, GRMZM2G096269_P01, GRMZM2G043291_P02, GRMZM2G475059_P01, GRMZM2G126763_P01, GRMZM2G335618_P01, GRMZM2G330635_P01, GRMZM2G416632_P01, …
GO:0016705	oxidoreductase activity, acting on paired donors, with incorporation or reduction of molecular oxygen	MOLECULAR_FUNCTION	0.00315835	29	41	1631	4930	GRMZM2G086003_P01, GRMZM2G072653_P01, GRMZM2G138074_P01, GRMZM2G081462_P01, GRMZM2G035042_P01, GRMZM2G168506_P01, GRMZM2G010221_P01, GRMZM2G062396_P01, GRMZM2G139874_P01, GRMZM2G033098_P01, GRMZM2G063756_P01, GRMZM2G143202_P01, GRMZM2G140915_P01, GRMZM2G128971_P01, GRMZM2G038487_P03, GRMZM2G140817_P01, GRMZM5G899349_P02, GRMZM2G056252_P01, GRMZM2G180399_P01, GRMZM2G172491_P01, GRMZM5G849107_P02, …
GO:0048193	Golgi vesicle transport	BIOLOGICAL_PROCESS	0.00820647	28	43	1632	4928	GRMZM2G006781_P01, GRMZM2G150201_P03, GRMZM2G053319_P01, GRMZM2G028929_P02, GRMZM2G178916_P03, GRMZM2G106960_P01, GRMZM2G127756_P01, GRMZM2G097568_P01, GRMZM2G103579_P01, GRMZM2G110822_P01, GRMZM2G086636_P01, GRMZM2G012600_P01, GRMZM2G122666_P01, GRMZM2G102903_P02, GRMZM2G174803_P01, GRMZM2G137984_P01, GRMZM2G149406_P01, GRMZM2G099056_P01, GRMZM2G125149_P01, GRMZM5G837058_P01, GRMZM2G039419_P01, …
GO:0022804	active transmembrane transporter activity	MOLECULAR_FUNCTION	0.0483068	28	127	1632	4844	GRMZM2G030167_P01, GRMZM2G701207_P01, GRMZM2G069458_P01, GRMZM2G148200_P01, GRMZM2G315375_P01, GRMZM2G159777_P01, GRMZM2G022248_P01, GRMZM2G048907_P01, GRMZM2G157564_P02, GRMZM2G029506_P01, GRMZM2G079777_P01, GRMZM2G428096_P01, GRMZM5G879240_P01, GRMZM5G816772_P01, GRMZM2G156068_P01, GRMZM2G060045_P01, GRMZM2G177812_P01, GRMZM2G179732_P02, GRMZM2G008232_P01, GRMZM2G163233_P04, GRMZM2G321725_P02, …
GO:0022402	cell cycle process	BIOLOGICAL_PROCESS	0.018221	27	44	1633	4927	GRMZM2G022625_P02, GRMZM2G096092_P01, AC155496.2_FGP009, GRMZM2G008273_P01, GRMZM2G078933_P01, GRMZM2G049342_P01, GRMZM2G083689_P01, GRMZM2G029859_P01, GRMZM2G069726_P01, GRMZM2G071518_P01, GRMZM2G094388_P01, GRMZM5G878823_P02, GRMZM2G029486_P01, GRMZM5G816015_P01, GRMZM2G117746_P01, GRMZM2G457381_P01, GRMZM2G465169_P02, GRMZM2G060952_P01, GRMZM2G153769_P01, GRMZM2G314647_P01, GRMZM2G139880_P01, …
GO:0016875	ligase activity, forming carbon-oxygen bonds	MOLECULAR_FUNCTION	0.00646801	27	40	1633	4931	GRMZM2G012404_P01, GRMZM2G168301_P01, GRMZM2G017671_P01, GRMZM2G032049_P01, GRMZM5G871297_P01, GRMZM2G117870_P01, GRMZM2G146589_P04, GRMZM2G094123_P01, GRMZM5G821551_P03, GRMZM2G057491_P01, GRMZM2G029055_P01, GRMZM2G177970_P01, GRMZM2G155899_P01, GRMZM2G158228_P01, AC233922.1_FGP004, GRMZM2G002687_P01, GRMZM2G101463_P01, GRMZM2G700926_P01, GRMZM2G383404_P01, GRMZM2G172101_P03, GRMZM2G386714_P01, …
GO:0004812	aminoacyl-tRNA ligase activity	MOLECULAR_FUNCTION	0.00646801	27	40	1633	4931	GRMZM2G012404_P01, GRMZM2G168301_P01, GRMZM2G017671_P01, GRMZM2G032049_P01, GRMZM5G871297_P01, GRMZM2G117870_P01, GRMZM2G146589_P04, GRMZM2G094123_P01, GRMZM5G821551_P03, GRMZM2G057491_P01, GRMZM2G029055_P01, GRMZM2G177970_P01, GRMZM2G155899_P01, GRMZM2G158228_P01, AC233922.1_FGP004, GRMZM2G002687_P01, GRMZM2G101463_P01, GRMZM2G700926_P01, GRMZM2G383404_P01, GRMZM2G172101_P03, GRMZM2G386714_P01, …
GO:0051254	positive regulation of RNA metabolic process	BIOLOGICAL_PROCESS	0.0390681	26	46	1634	4925	GRMZM2G032336_P01, GRMZM2G033493_P01, GRMZM2G056569_P01, GRMZM2G038313_P01, GRMZM2G032505_P03, GRMZM2G008273_P01, GRMZM2G091419_P01, GRMZM2G148106_P01, GRMZM2G049342_P01, GRMZM2G038126_P01, GRMZM2G110185_P02, GRMZM2G171745_P02, GRMZM2G141707_P01, GRMZM2G394403_P01, GRMZM2G107362_P02, GRMZM2G171604_P01, GRMZM2G000623_P02, GRMZM2G158024_P02, GRMZM2G122116_P01, GRMZM2G074037_P01, GRMZM2G136306_P01, …
GO:0006970	response to osmotic stress	BIOLOGICAL_PROCESS	0.0390681	26	46	1634	4925	GRMZM2G117642_P02, GRMZM2G025387_P01, GRMZM2G141931_P01, GRMZM2G060870_P02, GRMZM2G146115_P01, GRMZM2G145715_P01, GRMZM2G014720_P01, GRMZM2G024550_P01, GRMZM2G159369_P01, GRMZM2G128171_P03, GRMZM2G481843_P01, GRMZM2G127798_P01, GRMZM2G060669_P05, GRMZM2G033626_P02, GRMZM2G440208_P01, GRMZM2G163233_P04, GRMZM2G115750_P01, GRMZM2G399073_P02, GRMZM2G426275_P01, GRMZM2G019999_P01, GRMZM2G069758_P01, …
GO:0019843	rRNA binding	MOLECULAR_FUNCTION	0.000995222	26	31	1634	4940	GRMZM5G849223_P01, GRMZM2G064640_P01, GRMZM2G096962_P02, GRMZM2G069762_P01, GRMZM2G032315_P01, GRMZM2G376731_P01, GRMZM2G341621_P01, GRMZM2G078985_P01, GRMZM2G105712_P06, GRMZM2G094074_P02, GRMZM2G163081_P01, GRMZM2G054201_P01, GRMZM2G015024_P01, GRMZM2G156673_P01, GRMZM2G108348_P03, GRMZM5G838396_P01, GRMZM5G832108_P01, GRMZM2G153476_P01, GRMZM2G119471_P01, GRMZM2G142097_P02, GRMZM2G030203_P01, …
GO:0015318	inorganic molecular entity transmembrane transporter activity	MOLECULAR_FUNCTION	0.0147046	26	129	1634	4842	GRMZM2G030167_P01, GRMZM2G177912_P01, GRMZM2G701207_P01, GRMZM2G069458_P01, GRMZM2G356938_P01, GRMZM2G048907_P01, GRMZM2G157564_P02, AC209208.3_FGP002, GRMZM5G825759_P01, GRMZM2G428096_P01, GRMZM5G879240_P01, AC194341.4_FGP002, GRMZM2G156068_P01, GRMZM2G052088_P01, GRMZM2G177812_P01, GRMZM2G008232_P01, GRMZM2G163233_P04, GRMZM2G321725_P02, GRMZM2G064563_P02, GRMZM2G019999_P01, GRMZM2G144372_P01, …
GO:0002181	cytoplasmic translation	BIOLOGICAL_PROCESS	0.00159112	25	31	1635	4940	GRMZM2G422651_P01, GRMZM2G038313_P01, GRMZM2G336815_P01, GRMZM2G032315_P01, GRMZM2G100225_P01, GRMZM2G024647_P01, GRMZM2G327564_P01, GRMZM2G100120_P06, GRMZM2G178807_P01, GRMZM2G105712_P06, GRMZM2G158568_P01, GRMZM2G107654_P01, GRMZM5G868433_P01, GRMZM2G084757_P01, GRMZM2G064133_P01, GRMZM2G070487_P03, GRMZM2G028834_P03, GRMZM2G025214_P02, GRMZM2G010991_P01, GRMZM2G094051_P03, GRMZM2G028945_P01, …
GO:0006418	tRNA aminoacylation for protein translation	BIOLOGICAL_PROCESS	0.0130734	25	39	1635	4932	GRMZM2G012404_P01, GRMZM2G017671_P01, GRMZM2G032049_P01, GRMZM5G871297_P01, GRMZM2G117870_P01, GRMZM2G146589_P04, GRMZM2G094123_P01, GRMZM5G821551_P03, GRMZM2G057491_P01, GRMZM2G029055_P01, GRMZM2G177970_P01, GRMZM2G155899_P01, GRMZM2G158228_P01, AC233922.1_FGP004, GRMZM2G002687_P01, GRMZM2G101463_P01, GRMZM2G700926_P01, GRMZM2G383404_P01, GRMZM2G172101_P03, GRMZM2G386714_P01, GRMZM5G874500_P02, …
GO:0043039	tRNA aminoacylation	BIOLOGICAL_PROCESS	0.0214365	25	41	1635	4930	GRMZM2G012404_P01, GRMZM2G017671_P01, GRMZM2G032049_P01, GRMZM5G871297_P01, GRMZM2G117870_P01, GRMZM2G146589_P04, GRMZM2G094123_P01, GRMZM5G821551_P03, GRMZM2G057491_P01, GRMZM2G029055_P01, GRMZM2G177970_P01, GRMZM2G155899_P01, GRMZM2G158228_P01, AC233922.1_FGP004, GRMZM2G002687_P01, GRMZM2G101463_P01, GRMZM2G700926_P01, GRMZM2G383404_P01, GRMZM2G172101_P03, GRMZM2G386714_P01, GRMZM5G874500_P02, …
GO:0043038	amino acid activation	BIOLOGICAL_PROCESS	0.0214365	25	41	1635	4930	GRMZM2G012404_P01, GRMZM2G017671_P01, GRMZM2G032049_P01, GRMZM5G871297_P01, GRMZM2G117870_P01, GRMZM2G146589_P04, GRMZM2G094123_P01, GRMZM5G821551_P03, GRMZM2G057491_P01, GRMZM2G029055_P01, GRMZM2G177970_P01, GRMZM2G155899_P01, GRMZM2G158228_P01, AC233922.1_FGP004, GRMZM2G002687_P01, GRMZM2G101463_P01, GRMZM2G700926_P01, GRMZM2G383404_P01, GRMZM2G172101_P03, GRMZM2G386714_P01, GRMZM5G874500_P02, …
GO:0008565	protein transporter activity	MOLECULAR_FUNCTION	0.006822	25	36	1635	4935	GRMZM2G010362_P01, GRMZM2G318794_P01, GRMZM2G151905_P03, GRMZM2G361220_P01, GRMZM2G084767_P01, GRMZM2G159777_P01, GRMZM2G098674_P01, GRMZM2G088231_P01, GRMZM2G054210_P01, GRMZM2G012600_P01, GRMZM2G138419_P01, GRMZM2G376731_P01, GRMZM2G091119_P01, GRMZM2G174803_P01, GRMZM2G095124_P01, GRMZM2G066650_P01, GRMZM2G052435_P03, GRMZM2G052435_P02, GRMZM2G064600_P01, GRMZM2G137236_P01, GRMZM2G010743_P01, …
GO:0015075	ion transmembrane transporter activity	MOLECULAR_FUNCTION	0.0168403	25	125	1635	4846	GRMZM2G030167_P01, GRMZM2G177912_P01, GRMZM2G701207_P01, GRMZM2G069458_P01, GRMZM2G356938_P01, GRMZM2G048907_P01, GRMZM2G157564_P02, GRMZM5G825759_P01, GRMZM2G428096_P01, GRMZM5G879240_P01, AC194341.4_FGP002, GRMZM2G156068_P01, GRMZM2G052088_P01, GRMZM2G177812_P01, GRMZM2G008232_P01, GRMZM2G163233_P04, GRMZM2G321725_P02, GRMZM2G064563_P02, GRMZM2G019999_P01, GRMZM2G144372_P01, GRMZM2G025171_P01, …
GO:0042273	ribosomal large subunit biogenesis	BIOLOGICAL_PROCESS	9.00645e-07	23	13	1637	4958	GRMZM5G868433_P01, GRMZM2G054201_P01, GRMZM5G868062_P04, GRMZM2G074898_P01, GRMZM2G023748_P01, GRMZM2G119471_P01, GRMZM2G094051_P03, GRMZM2G135654_P01, GRMZM2G168330_P02, GRMZM2G068471_P01, GRMZM2G080129_P01, GRMZM2G100225_P01, GRMZM2G024647_P01, GRMZM2G144387_P03, GRMZM2G027451_P04, GRMZM2G050501_P01, GRMZM2G327564_P01, GRMZM2G178807_P01, GRMZM2G003384_P01, GRMZM2G005973_P01, GRMZM2G168920_P01, …
GO:0034976	response to endoplasmic reticulum stress	BIOLOGICAL_PROCESS	2.76585e-05	23	18	1637	4953	GRMZM2G129218_P01, GRMZM2G101875_P01, GRMZM2G150201_P03, GRMZM2G014076_P01, GRMZM2G091481_P01, GRMZM2G056569_P01, GRMZM2G341404_P01, GRMZM2G113629_P01, GRMZM2G032505_P03, GRMZM2G389173_P01, GRMZM2G074037_P01, GRMZM2G067476_P01, GRMZM2G033829_P01, GRMZM2G038126_P01, GRMZM2G051262_P01, GRMZM2G110185_P02, GRMZM2G021816_P01, GRMZM2G159369_P01, GRMZM2G104373_P01, GRMZM2G128171_P03, GRMZM2G027282_P01, …
GO:0009651	response to salt stress	BIOLOGICAL_PROCESS	0.0129284	23	34	1637	4937	GRMZM2G481843_P01, GRMZM2G117642_P02, GRMZM2G025387_P01, GRMZM2G127798_P01, GRMZM2G060669_P05, GRMZM2G440208_P01, GRMZM2G163233_P04, GRMZM2G141931_P01, GRMZM2G115750_P01, GRMZM2G399073_P02, GRMZM2G060870_P02, GRMZM2G146115_P01, GRMZM2G145715_P01, GRMZM2G019999_P01, GRMZM2G069758_P01, GRMZM2G014720_P01, GRMZM2G409627_P01, GRMZM2G064695_P04, GRMZM2G024550_P01, GRMZM2G124307_P01, GRMZM2G159369_P01, …
GO:0006417	regulation of translation	BIOLOGICAL_PROCESS	0.0258966	23	38	1637	4933	GRMZM2G422651_P01, GRMZM2G064133_P01, GRMZM2G024686_P01, GRMZM2G064640_P01, GRMZM2G033493_P01, GRMZM2G070487_P03, GRMZM2G092627_P01, GRMZM2G038313_P01, GRMZM2G336815_P01, GRMZM2G028834_P03, GRMZM2G025214_P02, GRMZM2G108348_P03, GRMZM2G128665_P01, GRMZM2G058407_P01, GRMZM5G832108_P01, GRMZM5G835323_P02, GRMZM2G151549_P01, GRMZM2G139341_P01, GRMZM2G100120_P06, GRMZM2G002616_P01, GRMZM2G153181_P01, …
GO:0034248	regulation of cellular amide metabolic process	BIOLOGICAL_PROCESS	0.0258966	23	38	1637	4933	GRMZM2G422651_P01, GRMZM2G064133_P01, GRMZM2G024686_P01, GRMZM2G064640_P01, GRMZM2G033493_P01, GRMZM2G070487_P03, GRMZM2G092627_P01, GRMZM2G038313_P01, GRMZM2G336815_P01, GRMZM2G028834_P03, GRMZM2G025214_P02, GRMZM2G108348_P03, GRMZM2G128665_P01, GRMZM2G058407_P01, GRMZM5G832108_P01, GRMZM5G835323_P02, GRMZM2G151549_P01, GRMZM2G139341_P01, GRMZM2G100120_P06, GRMZM2G002616_P01, GRMZM2G153181_P01, …
GO:0051020	GTPase binding	MOLECULAR_FUNCTION	0.000619582	23	25	1637	4946	GRMZM2G006474_P01, GRMZM2G094388_P01, GRMZM2G066650_P01, GRMZM2G099056_P01, GRMZM2G010362_P01, GRMZM2G151905_P03, GRMZM2G462803_P02, GRMZM2G082916_P01, GRMZM2G052435_P03, GRMZM2G052435_P02, GRMZM2G084767_P01, GRMZM2G335287_P01, GRMZM2G058870_P01, GRMZM2G107571_P01, GRMZM2G078933_P01, GRMZM2G167318_P01, GRMZM2G138419_P01, GRMZM2G376731_P01, GRMZM2G142806_P01, GRMZM2G096470_P01, GRMZM2G022258_P01, …
GO:0033218	amide binding	MOLECULAR_FUNCTION	0.00363756	23	30	1637	4941	GRMZM2G066650_P01, GRMZM2G010362_P01, GRMZM2G084767_P01, GRMZM2G053803_P02, GRMZM5G864319_P01, GRMZM2G098674_P01, GRMZM2G010861_P01, GRMZM2G088231_P01, GRMZM2G181542_P01, GRMZM2G326195_P01, GRMZM2G079908_P01, GRMZM2G138419_P01, GRMZM2G376731_P01, GRMZM2G173636_P02, GRMZM2G121022_P03, GRMZM2G344634_P01, GRMZM5G887631_P01, GRMZM2G002921_P01, GRMZM2G033619_P01, GRMZM2G052389_P01, GRMZM2G091119_P01, …
GO:0007017	microtubule-based process	BIOLOGICAL_PROCESS	0.00112608	22	25	1638	4946	GRMZM2G172932_P03, GRMZM2G115766_P01, GRMZM2G094388_P01, GRMZM5G878823_P02, GRMZM5G816015_P01, GRMZM2G117746_P01, GRMZM2G140342_P01, GRMZM2G164696_P01, GRMZM2G465169_P02, GRMZM2G096092_P01, GRMZM2G071790_P05, GRMZM2G472231_P01, GRMZM2G078933_P01, GRMZM2G158136_P01, GRMZM2G098042_P01, GRMZM2G083689_P01, GRMZM2G119773_P01, GRMZM2G152466_P01, GRMZM2G083243_P01, GRMZM2G071518_P01, GRMZM2G043822_P03, …
GO:0000278	mitotic cell cycle	BIOLOGICAL_PROCESS	0.00509963	22	29	1638	4942	GRMZM2G094388_P01, GRMZM2G542994_P01, GRMZM2G082962_P01, GRMZM2G029486_P01, GRMZM2G022625_P02, GRMZM2G117746_P01, GRMZM2G064212_P02, GRMZM2G096092_P01, AC155496.2_FGP009, GRMZM2G008273_P01, GRMZM2G168629_P01, GRMZM2G153769_P01, GRMZM2G314647_P01, GRMZM2G078933_P01, GRMZM2G049342_P01, GRMZM2G149717_P01, GRMZM2G143213_P02, GRMZM2G129444_P01, GRMZM2G083689_P01, GRMZM2G074466_P01, GRMZM2G069726_P01, …
GO:0007264	small GTPase mediated signal transduction	BIOLOGICAL_PROCESS	0.00593381	22	30	1638	4941	GRMZM2G006474_P01, GRMZM2G029486_P01, GRMZM2G462803_P02, GRMZM2G082916_P01, GRMZM2G335287_P01, GRMZM2G106960_P01, GRMZM2G058870_P01, GRMZM2G061900_P01, GRMZM2G473906_P05, GRMZM2G015361_P05, GRMZM2G171060_P02, GRMZM2G071071_P01, GRMZM2G127648_P01, GRMZM2G122805_P01, GRMZM2G081622_P01, GRMZM2G124732_P01, GRMZM2G167318_P01, GRMZM2G101938_P01, GRMZM2G122666_P01, GRMZM2G037204_P01, GRMZM2G061912_P01, …
GO:0009639	response to red or far red light	BIOLOGICAL_PROCESS	0.0177627	22	33	1638	4938	GRMZM2G033626_P02, GRMZM2G315375_P01, GRMZM2G038313_P01, GRMZM2G397759_P01, GRMZM2G107588_P01, AC155496.2_FGP009, GRMZM2G008273_P01, GRMZM2G162413_P02, GRMZM2G011491_P01, GRMZM2G168629_P01, GRMZM2G107741_P05, GRMZM2G028945_P01, GRMZM2G079196_P01, GRMZM2G021567_P01, GRMZM2G171745_P02, GRMZM2G151549_P01, GRMZM2G083689_P01, GRMZM2G012600_P01, GRMZM2G126435_P01, GRMZM2G178576_P02, GRMZM2G174803_P01, …
GO:0005996	monosaccharide metabolic process	BIOLOGICAL_PROCESS	0.000854138	21	131	1639	4840	GRMZM2G173315_P01, GRMZM2G117642_P02, GRMZM2G178602_P01, GRMZM2G383404_P01, GRMZM2G022266_P01, GRMZM2G155911_P01, GRMZM2G015709_P01, GRMZM2G173341_P03, GRMZM2G006565_P01, GRMZM2G075387_P01, GRMZM2G165919_P01, GRMZM2G007012_P01, GRMZM2G061321_P01, GRMZM2G130230_P03, GRMZM2G165390_P01, GRMZM2G071630_P01, GRMZM2G064695_P04, GRMZM2G076075_P02, GRMZM2G159369_P01, GRMZM2G128171_P03, GRMZM2G043331_P02
GO:0006979	response to oxidative stress	BIOLOGICAL_PROCESS	0.0032616	21	121	1639	4850	GRMZM2G129218_P01, GRMZM2G042592_P01, GRMZM2G424053_P02, GRMZM5G819807_P01, GRMZM2G341404_P01, GRMZM2G377115_P01, GRMZM5G864424_P01, GRMZM2G060561_P02, GRMZM2G173416_P02, GRMZM2G460406_P01, GRMZM5G843368_P01, GRMZM2G124455_P01, GRMZM2G021816_P01, GRMZM2G135893_P01, GRMZM2G004211_P01, GRMZM2G141707_P01, GRMZM2G012479_P01, GRMZM2G156068_P01, GRMZM2G436199_P01, GRMZM2G042080_P01, GRMZM2G120517_P02
GO:0006606	protein import into nucleus	BIOLOGICAL_PROCESS	0.0170656	21	32	1639	4939	GRMZM2G094388_P01, GRMZM2G066650_P01, GRMZM2G010362_P01, GRMZM2G052435_P03, GRMZM2G052435_P02, GRMZM2G084767_P01, GRMZM2G038313_P01, GRMZM2G098674_P01, GRMZM2G088231_P01, GRMZM2G078933_P01, GRMZM2G080129_P01, GRMZM2G052148_P01, GRMZM2G151549_P01, GRMZM2G050501_P01, GRMZM2G138419_P01, GRMZM2G376731_P01, GRMZM5G887631_P01, GRMZM2G033619_P01, GRMZM2G091119_P01, GRMZM2G009845_P02, AC233895.1_FGP001
GO:0051170	import into nucleus	BIOLOGICAL_PROCESS	0.0170656	21	32	1639	4939	GRMZM2G094388_P01, GRMZM2G066650_P01, GRMZM2G010362_P01, GRMZM2G052435_P03, GRMZM2G052435_P02, GRMZM2G084767_P01, GRMZM2G038313_P01, GRMZM2G098674_P01, GRMZM2G088231_P01, GRMZM2G078933_P01, GRMZM2G080129_P01, GRMZM2G052148_P01, GRMZM2G151549_P01, GRMZM2G050501_P01, GRMZM2G138419_P01, GRMZM2G376731_P01, GRMZM5G887631_P01, GRMZM2G033619_P01, GRMZM2G091119_P01, GRMZM2G009845_P02, AC233895.1_FGP001
GO:0034504	protein localization to nucleus	BIOLOGICAL_PROCESS	0.0170656	21	32	1639	4939	GRMZM2G094388_P01, GRMZM2G066650_P01, GRMZM2G010362_P01, GRMZM2G052435_P03, GRMZM2G052435_P02, GRMZM2G084767_P01, GRMZM2G038313_P01, GRMZM2G098674_P01, GRMZM2G088231_P01, GRMZM2G078933_P01, GRMZM2G080129_P01, GRMZM2G052148_P01, GRMZM2G151549_P01, GRMZM2G050501_P01, GRMZM2G138419_P01, GRMZM2G376731_P01, GRMZM5G887631_P01, GRMZM2G033619_P01, GRMZM2G091119_P01, GRMZM2G009845_P02, AC233895.1_FGP001
GO:0016999	antibiotic metabolic process	BIOLOGICAL_PROCESS	0.0183296	21	109	1639	4862	GRMZM2G064023_P02, GRMZM2G049811_P01, GRMZM2G133359_P01, GRMZM2G068455_P01, GRMZM2G082581_P01, GRMZM2G139680_P01, AC204530.4_FGP002, GRMZM2G063851_P01, GRMZM2G063909_P03, GRMZM2G460406_P01, GRMZM2G063909_P01, GRMZM2G112057_P01, GRMZM2G110714_P01, GRMZM2G409627_P01, GRMZM2G025171_P01, GRMZM2G064695_P04, GRMZM2G004211_P01, GRMZM2G161245_P02, GRMZM5G829778_P01, GRMZM2G069542_P01, GRMZM2G120517_P02
GO:0070925	organelle assembly	BIOLOGICAL_PROCESS	0.00435854	20	24	1640	4947	GRMZM2G073150_P01, GRMZM2G054201_P01, GRMZM5G816015_P01, GRMZM2G102075_P01, GRMZM2G043737_P01, GRMZM2G064212_P02, GRMZM2G086906_P01, GRMZM2G074898_P01, GRMZM2G156673_P01, GRMZM2G069762_P01, GRMZM2G096092_P01, GRMZM2G119471_P01, GRMZM2G024647_P01, GRMZM2G045818_P01, GRMZM2G027451_P04, GRMZM2G078985_P01, GRMZM2G003384_P01, GRMZM2G094074_P02, GRMZM2G071518_P01, GRMZM2G163081_P01
GO:1901659	glycosyl compound biosynthetic process	BIOLOGICAL_PROCESS	0.0351495	20	32	1640	4939	GRMZM2G035338_P02, GRMZM2G117642_P02, GRMZM2G100084_P01, GRMZM2G324285_P01, GRMZM2G101900_P02, GRMZM2G111579_P01, GRMZM2G021704_P02, GRMZM2G061988_P01, GRMZM2G135132_P01, GRMZM2G144635_P01, GRMZM2G059121_P01, GRMZM2G080380_P01, GRMZM2G169462_P01, GRMZM2G069772_P01, GRMZM2G137724_P01, GRMZM2G540538_P01, GRMZM2G448456_P01, GRMZM2G178576_P02, GRMZM2G136283_P01, GRMZM2G018786_P03
GO:0006220	pyrimidine nucleotide metabolic process	BIOLOGICAL_PROCESS	0.0382073	20	33	1640	4938	GRMZM2G035338_P02, GRMZM2G149281_P01, GRMZM2G114888_P02, GRMZM2G397759_P01, GRMZM2G044023_P01, GRMZM2G101900_P02, GRMZM2G011491_P01, GRMZM2G107741_P05, GRMZM6G832911_P01, GRMZM2G021704_P02, GRMZM2G139880_P01, GRMZM2G059121_P01, GRMZM2G080380_P01, GRMZM2G021567_P01, GRMZM2G169462_P01, GRMZM2G139462_P06, GRMZM2G119773_P01, GRMZM2G178576_P02, GRMZM2G037104_P01, AC233895.1_FGP001
GO:0006221	pyrimidine nucleotide biosynthetic process	BIOLOGICAL_PROCESS	0.0382073	20	33	1640	4938	GRMZM2G035338_P02, GRMZM2G149281_P01, GRMZM2G114888_P02, GRMZM2G397759_P01, GRMZM2G044023_P01, GRMZM2G101900_P02, GRMZM2G011491_P01, GRMZM2G107741_P05, GRMZM6G832911_P01, GRMZM2G021704_P02, GRMZM2G139880_P01, GRMZM2G059121_P01, GRMZM2G080380_P01, GRMZM2G021567_P01, GRMZM2G169462_P01, GRMZM2G139462_P06, GRMZM2G119773_P01, GRMZM2G178576_P02, GRMZM2G037104_P01, AC233895.1_FGP001
GO:0016798	hydrolase activity, acting on glycosyl bonds	MOLECULAR_FUNCTION	3.05127e-06	20	160	1640	4811	GRMZM2G074300_P02, GRMZM2G150201_P03, GRMZM2G477236_P01, GRMZM2G024686_P01, GRMZM2G034575_P01, GRMZM2G115451_P02, GRMZM2G099352_P03, GRMZM2G064212_P02, GRMZM2G040843_P01, GRMZM2G027640_P01, GRMZM2G004699_P01, GRMZM2G002260_P01, GRMZM2G147849_P01, GRMZM2G147422_P01, GRMZM2G168364_P01, GRMZM2G143791_P01, GRMZM5G858249_P01, GRMZM2G005633_P02, GRMZM2G170842_P01, GRMZM2G123714_P01
GO:0042274	ribosomal small subunit biogenesis	BIOLOGICAL_PROCESS	2.55308e-05	18	11	1642	4960	GRMZM2G073150_P01, GRMZM2G377797_P01, GRMZM5G868062_P04, GRMZM2G102075_P01, GRMZM2G030016_P02, GRMZM2G171426_P01, GRMZM2G093574_P02, GRMZM2G043737_P01, GRMZM2G054136_P09, GRMZM2G086906_P01, GRMZM2G156673_P01, GRMZM2G069762_P01, GRMZM6G832911_P01, GRMZM2G053652_P02, GRMZM2G045818_P01, GRMZM2G091383_P01, GRMZM2G078985_P01, GRMZM2G094074_P02
GO:0051130	positive regulation of cellular component organization	BIOLOGICAL_PROCESS	0.000253659	18	14	1642	4957	GRMZM2G094388_P01, GRMZM2G056569_P01, GRMZM2G139038_P01, GRMZM2G032505_P03, AC204530.4_FGP002, GRMZM2G096092_P01, GRMZM2G168629_P01, GRMZM2G103599_P01, GRMZM2G074037_P01, GRMZM2G078933_P01, GRMZM2G049342_P01, GRMZM2G038126_P01, GRMZM2G110185_P02, GRMZM2G342386_P02, GRMZM2G104373_P01, GRMZM2G027282_P01, GRMZM2G107362_P02, GRMZM2G171604_P01
GO:0032940	secretion by cell	BIOLOGICAL_PROCESS	0.00997174	18	23	1642	4948	GRMZM2G099056_P01, GRMZM2G387076_P02, GRMZM2G070045_P01, GRMZM5G823484_P01, GRMZM2G052670_P01, GRMZM2G059965_P01, GRMZM2G061900_P01, GRMZM2G014872_P02, GRMZM2G141931_P01, GRMZM2G133756_P01, GRMZM2G399073_P02, GRMZM2G074530_P01, GRMZM2G330772_P02, GRMZM5G846196_P01, GRMZM2G003734_P01, GRMZM2G327394_P01, GRMZM2G048117_P01, GRMZM2G144739_P01
GO:0046903	secretion	BIOLOGICAL_PROCESS	0.00997174	18	23	1642	4948	GRMZM2G099056_P01, GRMZM2G387076_P02, GRMZM2G070045_P01, GRMZM5G823484_P01, GRMZM2G052670_P01, GRMZM2G059965_P01, GRMZM2G061900_P01, GRMZM2G014872_P02, GRMZM2G141931_P01, GRMZM2G133756_P01, GRMZM2G399073_P02, GRMZM2G074530_P01, GRMZM2G330772_P02, GRMZM5G846196_P01, GRMZM2G003734_P01, GRMZM2G327394_P01, GRMZM2G048117_P01, GRMZM2G144739_P01
GO:0016050	vesicle organization	BIOLOGICAL_PROCESS	0.0114507	18	24	1642	4947	GRMZM2G387076_P02, GRMZM2G107757_P02, GRMZM5G837058_P01, GRMZM2G330772_P02, GRMZM5G846196_P01, GRMZM5G839592_P03, GRMZM2G012600_P01, GRMZM2G017077_P01, GRMZM2G330650_P01, GRMZM2G115775_P01, GRMZM2G142806_P01, GRMZM2G096470_P01, GRMZM2G108087_P01, GRMZM2G107968_P01, GRMZM2G102903_P02, GRMZM2G369047_P01, GRMZM2G174803_P01, GRMZM2G010836_P02
GO:0017016	Ras GTPase binding	MOLECULAR_FUNCTION	0.0014498	18	18	1642	4953	GRMZM2G094388_P01, GRMZM2G066650_P01, GRMZM2G099056_P01, GRMZM2G010362_P01, GRMZM2G151905_P03, GRMZM2G462803_P02, GRMZM2G052435_P03, GRMZM2G052435_P02, GRMZM2G084767_P01, GRMZM2G107571_P01, GRMZM2G078933_P01, GRMZM2G138419_P01, GRMZM2G376731_P01, GRMZM2G142806_P01, GRMZM2G096470_P01, GRMZM2G022258_P01, GRMZM5G887631_P01, GRMZM2G033619_P01
GO:0031267	small GTPase binding	MOLECULAR_FUNCTION	0.0014498	18	18	1642	4953	GRMZM2G094388_P01, GRMZM2G066650_P01, GRMZM2G099056_P01, GRMZM2G010362_P01, GRMZM2G151905_P03, GRMZM2G462803_P02, GRMZM2G052435_P03, GRMZM2G052435_P02, GRMZM2G084767_P01, GRMZM2G107571_P01, GRMZM2G078933_P01, GRMZM2G138419_P01, GRMZM2G376731_P01, GRMZM2G142806_P01, GRMZM2G096470_P01, GRMZM2G022258_P01, GRMZM5G887631_P01, GRMZM2G033619_P01
GO:0009640	photomorphogenesis	BIOLOGICAL_PROCESS	0.00267859	17	18	1643	4953	GRMZM2G033626_P02, GRMZM2G315375_P01, GRMZM2G038313_P01, GRMZM2G397759_P01, GRMZM2G107588_P01, AC155496.2_FGP009, GRMZM2G008273_P01, GRMZM2G011491_P01, GRMZM2G168629_P01, GRMZM2G107741_P05, GRMZM2G028945_P01, GRMZM2G079196_P01, GRMZM2G021567_P01, GRMZM2G171745_P02, GRMZM2G151549_P01, GRMZM2G083689_P01, AC233895.1_FGP001
GO:0061025	membrane fusion	BIOLOGICAL_PROCESS	0.00267859	17	18	1643	4953	GRMZM2G387076_P02, GRMZM5G837058_P01, GRMZM2G330772_P02, GRMZM5G846196_P01, GRMZM2G145175_P02, GRMZM2G012600_P01, GRMZM2G098496_P02, GRMZM2G330650_P01, GRMZM2G115775_P01, GRMZM2G142806_P01, GRMZM2G096470_P01, GRMZM2G108087_P01, GRMZM2G107968_P01, GRMZM2G102903_P02, GRMZM2G369047_P01, GRMZM2G174803_P01, GRMZM2G010836_P02
GO:0044087	regulation of cellular component biogenesis	BIOLOGICAL_PROCESS	0.00355103	17	19	1643	4952	GRMZM2G056569_P01, GRMZM2G032505_P03, AC204530.4_FGP002, GRMZM2G096092_P01, GRMZM2G168629_P01, GRMZM2G103599_P01, GRMZM2G074037_P01, GRMZM2G068471_P01, GRMZM2G049342_P01, GRMZM2G038126_P01, GRMZM2G110185_P02, GRMZM2G342386_P02, GRMZM2G104373_P01, GRMZM2G369047_P01, GRMZM2G027282_P01, GRMZM2G107362_P02, GRMZM2G171604_P01
GO:0009163	nucleoside biosynthetic process	BIOLOGICAL_PROCESS	0.0078515	17	21	1643	4950	GRMZM2G035338_P02, GRMZM2G100084_P01, GRMZM2G324285_P01, GRMZM2G101900_P02, GRMZM2G021704_P02, GRMZM2G135132_P01, GRMZM2G144635_P01, GRMZM2G059121_P01, GRMZM2G080380_P01, GRMZM2G169462_P01, GRMZM2G069772_P01, GRMZM2G137724_P01, GRMZM2G540538_P01, GRMZM2G448456_P01, GRMZM2G178576_P02, GRMZM2G136283_P01, GRMZM2G018786_P03
GO:0004553	hydrolase activity, hydrolyzing O-glycosyl compounds	MOLECULAR_FUNCTION	4.9231e-06	17	143	1643	4828	GRMZM2G150201_P03, GRMZM2G477236_P01, GRMZM2G034575_P01, GRMZM2G115451_P02, GRMZM2G064212_P02, GRMZM2G040843_P01, GRMZM2G027640_P01, GRMZM2G004699_P01, GRMZM2G002260_P01, GRMZM2G147849_P01, GRMZM2G147422_P01, GRMZM2G168364_P01, GRMZM2G143791_P01, GRMZM5G858249_P01, GRMZM2G005633_P02, GRMZM2G170842_P01, GRMZM2G123714_P01
GO:0042255	ribosome assembly	BIOLOGICAL_PROCESS	0.000981864	16	14	1644	4957	GRMZM2G073150_P01, GRMZM2G054201_P01, GRMZM2G102075_P01, GRMZM2G043737_P01, GRMZM2G086906_P01, GRMZM2G074898_P01, GRMZM2G156673_P01, GRMZM2G069762_P01, GRMZM2G119471_P01, GRMZM2G024647_P01, GRMZM2G045818_P01, GRMZM2G027451_P04, GRMZM2G078985_P01, GRMZM2G003384_P01, GRMZM2G094074_P02, GRMZM2G163081_P01
GO:0043254	regulation of protein complex assembly	BIOLOGICAL_PROCESS	0.00384216	16	17	1644	4954	GRMZM2G056569_P01, GRMZM2G032505_P03, AC204530.4_FGP002, GRMZM2G096092_P01, GRMZM2G168629_P01, GRMZM2G103599_P01, GRMZM2G074037_P01, GRMZM2G049342_P01, GRMZM2G038126_P01, GRMZM2G110185_P02, GRMZM2G342386_P02, GRMZM2G104373_P01, GRMZM2G369047_P01, GRMZM2G027282_P01, GRMZM2G107362_P02, GRMZM2G171604_P01
GO:1903047	mitotic cell cycle process	BIOLOGICAL_PROCESS	0.0049952	16	18	1644	4953	GRMZM2G094388_P01, GRMZM2G029486_P01, GRMZM2G022625_P02, GRMZM2G117746_P01, GRMZM2G096092_P01, GRMZM2G008273_P01, GRMZM2G153769_P01, GRMZM2G314647_P01, GRMZM2G078933_P01, GRMZM2G049342_P01, GRMZM2G149717_P01, GRMZM2G129444_P01, GRMZM2G083689_P01, GRMZM2G074466_P01, GRMZM2G069726_P01, GRMZM2G071518_P01
GO:0042455	ribonucleoside biosynthetic process	BIOLOGICAL_PROCESS	0.020309	16	21	1644	4950	GRMZM2G035338_P02, GRMZM2G100084_P01, GRMZM2G324285_P01, GRMZM2G101900_P02, GRMZM2G021704_P02, GRMZM2G135132_P01, GRMZM2G144635_P01, GRMZM2G059121_P01, GRMZM2G080380_P01, GRMZM2G169462_P01, GRMZM2G069772_P01, GRMZM2G137724_P01, GRMZM2G540538_P01, GRMZM2G448456_P01, GRMZM2G178576_P02, GRMZM2G136283_P01
GO:0009698	phenylpropanoid metabolic process	BIOLOGICAL_PROCESS	0.0259657	16	23	1644	4948	AC196475.3_FGP004, GRMZM2G138074_P01, GRMZM2G054013_P02, GRMZM2G127948_P01, GRMZM2G074604_P01, GRMZM2G163406_P01, GRMZM2G134256_P01, GRMZM2G075333_P01, GRMZM2G122810_P05, GRMZM2G441347_P01, GRMZM2G139874_P01, GRMZM2G480516_P01, GRMZM2G160541_P02, GRMZM2G057000_P03, GRMZM2G055320_P01, GRMZM2G140817_P01
GO:0048284	organelle fusion	BIOLOGICAL_PROCESS	0.046089	16	25	1644	4946	GRMZM2G387076_P02, GRMZM5G837058_P01, GRMZM2G330772_P02, GRMZM5G846196_P01, GRMZM2G045818_P01, GRMZM2G012600_P01, GRMZM2G330650_P01, GRMZM2G115775_P01, GRMZM2G142806_P01, GRMZM2G096470_P01, GRMZM2G108087_P01, GRMZM2G107968_P01, GRMZM2G102903_P02, GRMZM2G369047_P01, GRMZM2G174803_P01, GRMZM2G010836_P02
GO:0044089	positive regulation of cellular component biogenesis	BIOLOGICAL_PROCESS	5.36825e-05	15	8	1645	4963	GRMZM2G056569_P01, GRMZM2G032505_P03, AC204530.4_FGP002, GRMZM2G096092_P01, GRMZM2G168629_P01, GRMZM2G103599_P01, GRMZM2G074037_P01, GRMZM2G049342_P01, GRMZM2G038126_P01, GRMZM2G110185_P02, GRMZM2G342386_P02, GRMZM2G104373_P01, GRMZM2G027282_P01, GRMZM2G107362_P02, GRMZM2G171604_P01
GO:0031334	positive regulation of protein complex assembly	BIOLOGICAL_PROCESS	5.36825e-05	15	8	1645	4963	GRMZM2G056569_P01, GRMZM2G032505_P03, AC204530.4_FGP002, GRMZM2G096092_P01, GRMZM2G168629_P01, GRMZM2G103599_P01, GRMZM2G074037_P01, GRMZM2G049342_P01, GRMZM2G038126_P01, GRMZM2G110185_P02, GRMZM2G342386_P02, GRMZM2G104373_P01, GRMZM2G027282_P01, GRMZM2G107362_P02, GRMZM2G171604_P01
GO:0044282	small molecule catabolic process	BIOLOGICAL_PROCESS	0.00019813	15	115	1645	4856	GRMZM2G049811_P01, GRMZM2G164141_P02, GRMZM2G033626_P02, GRMZM2G074604_P01, GRMZM2G000753_P01, GRMZM2G173341_P03, GRMZM5G864319_P01, GRMZM2G441347_P01, GRMZM2G124353_P01, GRMZM2G160541_P02, GRMZM2G064695_P04, GRMZM2G137724_P01, GRMZM5G828302_P03, GRMZM2G052389_P01, GRMZM2G119249_P02
GO:0009894	regulation of catabolic process	BIOLOGICAL_PROCESS	0.000385374	15	11	1645	4960	GRMZM2G056569_P01, GRMZM2G119761_P01, GRMZM2G032505_P03, GRMZM2G382106_P01, GRMZM2G133756_P01, GRMZM2G074037_P01, GRMZM2G180578_P01, GRMZM2G049342_P01, GRMZM2G038126_P01, GRMZM2G110185_P02, GRMZM2G104373_P01, GRMZM2G018929_P02, GRMZM2G027282_P01, GRMZM2G107362_P02, GRMZM2G171604_P01
GO:0090174	organelle membrane fusion	BIOLOGICAL_PROCESS	0.00463884	15	15	1645	4956	GRMZM2G387076_P02, GRMZM5G837058_P01, GRMZM2G330772_P02, GRMZM5G846196_P01, GRMZM2G012600_P01, GRMZM2G330650_P01, GRMZM2G115775_P01, GRMZM2G142806_P01, GRMZM2G096470_P01, GRMZM2G108087_P01, GRMZM2G107968_P01, GRMZM2G102903_P02, GRMZM2G369047_P01, GRMZM2G174803_P01, GRMZM2G010836_P02
GO:0006906	vesicle fusion	BIOLOGICAL_PROCESS	0.00463884	15	15	1645	4956	GRMZM2G387076_P02, GRMZM5G837058_P01, GRMZM2G330772_P02, GRMZM5G846196_P01, GRMZM2G012600_P01, GRMZM2G330650_P01, GRMZM2G115775_P01, GRMZM2G142806_P01, GRMZM2G096470_P01, GRMZM2G108087_P01, GRMZM2G107968_P01, GRMZM2G102903_P02, GRMZM2G369047_P01, GRMZM2G174803_P01, GRMZM2G010836_P02
GO:0051247	positive regulation of protein metabolic process	BIOLOGICAL_PROCESS	0.0135822	15	18	1645	4953	GRMZM2G064640_P01, GRMZM2G056569_P01, GRMZM2G108348_P03, GRMZM2G128665_P01, GRMZM2G032505_P03, GRMZM2G175272_P01, GRMZM2G032315_P01, GRMZM5G832108_P01, GRMZM2G074037_P01, GRMZM2G038126_P01, GRMZM2G110185_P02, GRMZM2G104373_P01, GRMZM2G027282_P01, GRMZM2G107362_P02, GRMZM2G171604_P01
GO:0006887	exocytosis	BIOLOGICAL_PROCESS	0.0135822	15	18	1645	4953	GRMZM2G099056_P01, GRMZM2G387076_P02, GRMZM2G070045_P01, GRMZM5G823484_P01, GRMZM2G052670_P01, GRMZM2G059965_P01, GRMZM2G061900_P01, GRMZM2G014872_P02, GRMZM2G133756_P01, GRMZM2G074530_P01, GRMZM2G330772_P02, GRMZM5G846196_P01, GRMZM2G003734_P01, GRMZM2G327394_P01, GRMZM2G144739_P01
GO:0032270	positive regulation of cellular protein metabolic process	BIOLOGICAL_PROCESS	0.0135822	15	18	1645	4953	GRMZM2G064640_P01, GRMZM2G056569_P01, GRMZM2G108348_P03, GRMZM2G128665_P01, GRMZM2G032505_P03, GRMZM2G175272_P01, GRMZM2G032315_P01, GRMZM5G832108_P01, GRMZM2G074037_P01, GRMZM2G038126_P01, GRMZM2G110185_P02, GRMZM2G104373_P01, GRMZM2G027282_P01, GRMZM2G107362_P02, GRMZM2G171604_P01
GO:0030243	cellulose metabolic process	BIOLOGICAL_PROCESS	0.0189677	15	20	1645	4951	GRMZM2G480620_P01, GRMZM2G027723_P01, GRMZM2G162286_P01, GRMZM2G110145_P01, GRMZM2G034575_P01, GRMZM2G173341_P03, GRMZM2G087326_P01, GRMZM2G111642_P01, GRMZM2G445905_P03, GRMZM2G147849_P01, GRMZM2G027862_P01, GRMZM2G147422_P01, GRMZM2G023652_P01, GRMZM2G018241_P01, GRMZM2G074546_P01
GO:0009404	toxin metabolic process	BIOLOGICAL_PROCESS	6.72065e-05	14	7	1646	4964	GRMZM2G475059_P01, GRMZM2G335618_P01, GRMZM2G330635_P01, GRMZM2G416632_P01, GRMZM2G363540_P01, GRMZM2G428168_P01, GRMZM2G111579_P01, AC194970.5_FGP001, GRMZM2G178079_P02, GRMZM2G004131_P01, GRMZM2G097989_P01, GRMZM2G447632_P01, GRMZM2G308687_P01, GRMZM2G146475_P01
GO:0008202	steroid metabolic process	BIOLOGICAL_PROCESS	0.00284573	14	13	1646	4958	GRMZM2G481843_P01, GRMZM2G072653_P01, GRMZM2G112530_P01, GRMZM2G003853_P01, GRMZM2G168681_P01, GRMZM2G075701_P01, GRMZM2G122810_P05, GRMZM2G033098_P01, GRMZM2G057000_P03, GRMZM2G126682_P01, GRMZM2G149224_P01, GRMZM2G098569_P01, GRMZM2G023652_P01, GRMZM5G899349_P02
GO:0042737	drug catabolic process	BIOLOGICAL_PROCESS	0.00323347	14	92	1646	4879	GRMZM2G049811_P01, GRMZM2G074604_P01, GRMZM2G131912_P01, GRMZM2G139680_P01, GRMZM2G441347_P01, GRMZM2G005562_P03, GRMZM2G460406_P01, GRMZM2G160541_P02, GRMZM2G168364_P01, GRMZM2G137724_P01, GRMZM2G004211_P01, GRMZM2G005633_P02, GRMZM2G119249_P02, GRMZM2G120517_P02
GO:0006891	intra-Golgi vesicle-mediated transport	BIOLOGICAL_PROCESS	0.00809323	14	15	1646	4956	GRMZM2G149406_P01, GRMZM2G006781_P01, GRMZM2G028929_P02, GRMZM2G178916_P03, GRMZM5G837058_P01, GRMZM2G039419_P01, GRMZM2G103579_P01, GRMZM2G141587_P03, AC199782.5_FGP001, GRMZM2G330650_P01, AC155622.2_FGP001, GRMZM5G825854_P01, GRMZM2G102903_P02, GRMZM2G010836_P02
GO:0009073	aromatic amino acid family biosynthetic process	BIOLOGICAL_PROCESS	0.0496124	14	21	1646	4950	GRMZM2G124365_P01, GRMZM2G171383_P01, GRMZM2G161566_P01, GRMZM2G005024_P01, GRMZM2G466543_P01, GRMZM2G145870_P02, GRMZM2G138382_P01, GRMZM2G028369_P01, GRMZM2G573867_P01, GRMZM2G084942_P02, GRMZM2G117707_P02, GRMZM2G169593_P01, GRMZM2G365160_P01, GRMZM2G119249_P02
GO:0008536	Ran GTPase binding	MOLECULAR_FUNCTION	0.000908414	14	11	1646	4960	GRMZM2G094388_P01, GRMZM2G066650_P01, GRMZM2G010362_P01, GRMZM2G151905_P03, GRMZM2G052435_P03, GRMZM2G052435_P02, GRMZM2G084767_P01, GRMZM2G107571_P01, GRMZM2G078933_P01, GRMZM2G138419_P01, GRMZM2G376731_P01, GRMZM2G022258_P01, GRMZM5G887631_P01, GRMZM2G033619_P01
GO:0000149	SNARE binding	MOLECULAR_FUNCTION	0.000908414	14	11	1646	4960	GRMZM2G387076_P02, GRMZM2G070045_P01, GRMZM5G837058_P01, GRMZM2G330772_P02, GRMZM5G846196_P01, GRMZM2G145175_P02, GRMZM2G098496_P02, GRMZM2G330650_P01, GRMZM2G115775_P01, GRMZM2G108087_P01, GRMZM2G107968_P01, GRMZM2G102903_P02, GRMZM2G137984_P01, GRMZM2G010836_P02
GO:0043021	ribonucleoprotein complex binding	MOLECULAR_FUNCTION	0.0197391	14	17	1646	4954	GRMZM2G027021_P01, GRMZM2G145905_P01, GRMZM2G038494_P01, GRMZM2G070723_P02, GRMZM2G092627_P01, GRMZM2G058407_P01, GRMZM2G146115_P01, GRMZM2G068471_P01, GRMZM2G050501_P01, GRMZM2G139341_P01, GRMZM2G121022_P03, GRMZM2G100120_P06, GRMZM2G160801_P01, GRMZM2G058138_P01
GO:0001731	formation of translation preinitiation complex	BIOLOGICAL_PROCESS	8.26331e-05	13	6	1647	4965	GRMZM2G422651_P01, GRMZM2G064133_P01, GRMZM2G070487_P03, GRMZM2G038313_P01, GRMZM2G336815_P01, GRMZM2G028834_P03, GRMZM2G025214_P02, GRMZM2G028945_P01, GRMZM2G151549_P01, GRMZM2G100120_P06, GRMZM2G153181_P01, GRMZM2G107654_P01, GRMZM2G093050_P01
GO:0031329	regulation of cellular catabolic process	BIOLOGICAL_PROCESS	8.26331e-05	13	6	1647	4965	GRMZM2G056569_P01, GRMZM2G032505_P03, GRMZM2G382106_P01, GRMZM2G133756_P01, GRMZM2G074037_P01, GRMZM2G049342_P01, GRMZM2G038126_P01, GRMZM2G110185_P02, GRMZM2G104373_P01, GRMZM2G018929_P02, GRMZM2G027282_P01, GRMZM2G107362_P02, GRMZM2G171604_P01
GO:0002183	cytoplasmic translational initiation	BIOLOGICAL_PROCESS	8.26331e-05	13	6	1647	4965	GRMZM2G422651_P01, GRMZM2G064133_P01, GRMZM2G070487_P03, GRMZM2G038313_P01, GRMZM2G336815_P01, GRMZM2G028834_P03, GRMZM2G025214_P02, GRMZM2G028945_P01, GRMZM2G151549_P01, GRMZM2G100120_P06, GRMZM2G153181_P01, GRMZM2G107654_P01, GRMZM2G093050_P01
GO:0044769	ATPase activity, coupled to transmembrane movement of ions, rotational mechanism	MOLECULAR_FUNCTION	0.000182041	13	7	1647	4964	GRMZM2G030167_P01, GRMZM2G701207_P01, GRMZM2G069458_P01, GRMZM2G008232_P01, GRMZM2G163233_P04, GRMZM2G321725_P02, GRMZM2G048907_P01, GRMZM2G019999_P01, GRMZM2G025171_P01, GRMZM2G058910_P01, GRMZM5G879240_P01, GRMZM2G070360_P01, GRMZM2G156068_P01
GO:0015988	energy coupled proton transmembrane transport, against electrochemical gradient	BIOLOGICAL_PROCESS	0.000229573	12	6	1648	4965	GRMZM2G030167_P01, GRMZM2G177912_P01, GRMZM2G052088_P01, GRMZM2G701207_P01, GRMZM2G019999_P01, GRMZM2G144372_P01, GRMZM2G008232_P01, GRMZM2G058910_P01, GRMZM2G128995_P01, GRMZM2G163233_P04, GRMZM5G879240_P01, GRMZM2G070360_P01
GO:0000470	maturation of LSU-rRNA	BIOLOGICAL_PROCESS	1.22402e-05	12	3	1648	4968	GRMZM5G868433_P01, GRMZM2G135654_P01, GRMZM2G068471_P01, GRMZM2G100225_P01, GRMZM5G868062_P04, GRMZM2G144387_P03, GRMZM2G050501_P01, GRMZM2G178807_P01, GRMZM2G005973_P01, GRMZM2G043279_P01, GRMZM2G023748_P01, GRMZM2G094051_P03
GO:0099132	ATP hydrolysis coupled cation transmembrane transport	BIOLOGICAL_PROCESS	0.000229573	12	6	1648	4965	GRMZM2G030167_P01, GRMZM2G177912_P01, GRMZM2G052088_P01, GRMZM2G701207_P01, GRMZM2G019999_P01, GRMZM2G144372_P01, GRMZM2G008232_P01, GRMZM2G058910_P01, GRMZM2G128995_P01, GRMZM2G163233_P04, GRMZM5G879240_P01, GRMZM2G070360_P01
GO:0099131	ATP hydrolysis coupled ion transmembrane transport	BIOLOGICAL_PROCESS	0.000229573	12	6	1648	4965	GRMZM2G030167_P01, GRMZM2G177912_P01, GRMZM2G052088_P01, GRMZM2G701207_P01, GRMZM2G019999_P01, GRMZM2G144372_P01, GRMZM2G008232_P01, GRMZM2G058910_P01, GRMZM2G128995_P01, GRMZM2G163233_P04, GRMZM5G879240_P01, GRMZM2G070360_P01
GO:0090662	ATP hydrolysis coupled transmembrane transport	BIOLOGICAL_PROCESS	0.000229573	12	6	1648	4965	GRMZM2G030167_P01, GRMZM2G177912_P01, GRMZM2G052088_P01, GRMZM2G701207_P01, GRMZM2G019999_P01, GRMZM2G144372_P01, GRMZM2G008232_P01, GRMZM2G058910_P01, GRMZM2G128995_P01, GRMZM2G163233_P04, GRMZM5G879240_P01, GRMZM2G070360_P01
GO:0015991	ATP hydrolysis coupled proton transport	BIOLOGICAL_PROCESS	0.000229573	12	6	1648	4965	GRMZM2G030167_P01, GRMZM2G177912_P01, GRMZM2G052088_P01, GRMZM2G701207_P01, GRMZM2G019999_P01, GRMZM2G144372_P01, GRMZM2G008232_P01, GRMZM2G058910_P01, GRMZM2G128995_P01, GRMZM2G163233_P04, GRMZM5G879240_P01, GRMZM2G070360_P01
GO:0072593	reactive oxygen species metabolic process	BIOLOGICAL_PROCESS	0.00215177	12	86	1648	4885	GRMZM5G864424_P01, GRMZM2G133359_P01, GRMZM2G460406_P01, GRMZM2G409627_P01, GRMZM2G124455_P01, GRMZM2G025171_P01, GRMZM2G139680_P01, GRMZM2G004211_P01, GRMZM2G131769_P01, AC204530.4_FGP002, GRMZM2G042080_P01, GRMZM2G120517_P02
GO:0006694	steroid biosynthetic process	BIOLOGICAL_PROCESS	0.00460677	12	10	1648	4961	GRMZM2G481843_P01, GRMZM2G057000_P03, GRMZM2G112530_P01, GRMZM2G126682_P01, GRMZM2G003853_P01, GRMZM2G149224_P01, GRMZM2G168681_P01, GRMZM2G098569_P01, GRMZM2G023652_P01, GRMZM2G075701_P01, GRMZM2G122810_P05, GRMZM5G899349_P02
GO:0016125	sterol metabolic process	BIOLOGICAL_PROCESS	0.00460677	12	10	1648	4961	GRMZM2G033098_P01, GRMZM2G481843_P01, GRMZM2G072653_P01, GRMZM2G057000_P03, GRMZM2G126682_P01, GRMZM2G003853_P01, GRMZM2G168681_P01, GRMZM2G098569_P01, GRMZM2G023652_P01, GRMZM2G075701_P01, GRMZM2G122810_P05, GRMZM5G899349_P02
GO:0097237	cellular response to toxic substance	BIOLOGICAL_PROCESS	0.00949313	12	77	1648	4894	GRMZM5G864424_P01, GRMZM2G460406_P01, GRMZM2G124455_P01, GRMZM2G129761_P01, GRMZM2G139680_P01, GRMZM2G163641_P01, GRMZM2G135893_P01, GRMZM2G004211_P01, GRMZM2G012479_P01, GRMZM5G826194_P02, GRMZM2G042080_P01, GRMZM2G120517_P02
GO:0048278	vesicle docking	BIOLOGICAL_PROCESS	0.0176018	12	13	1648	4958	GRMZM5G823484_P01, GRMZM2G003734_P01, GRMZM2G052670_P01, GRMZM2G327394_P01, GRMZM2G012600_P01, GRMZM2G115775_P01, GRMZM2G061900_P01, GRMZM2G108087_P01, GRMZM2G014872_P02, GRMZM2G144739_P01, GRMZM2G174803_P01, GRMZM2G330772_P02
GO:0022406	membrane docking	BIOLOGICAL_PROCESS	0.0176018	12	13	1648	4958	GRMZM5G823484_P01, GRMZM2G003734_P01, GRMZM2G052670_P01, GRMZM2G327394_P01, GRMZM2G012600_P01, GRMZM2G115775_P01, GRMZM2G061900_P01, GRMZM2G108087_P01, GRMZM2G014872_P02, GRMZM2G144739_P01, GRMZM2G174803_P01, GRMZM2G330772_P02
GO:0140056	organelle localization by membrane tethering	BIOLOGICAL_PROCESS	0.0176018	12	13	1648	4958	GRMZM5G823484_P01, GRMZM2G003734_P01, GRMZM2G052670_P01, GRMZM2G327394_P01, GRMZM2G012600_P01, GRMZM2G115775_P01, GRMZM2G061900_P01, GRMZM2G108087_P01, GRMZM2G014872_P02, GRMZM2G144739_P01, GRMZM2G174803_P01, GRMZM2G330772_P02
GO:1990748	cellular detoxification	BIOLOGICAL_PROCESS	0.0220013	12	72	1648	4899	GRMZM5G864424_P01, GRMZM2G460406_P01, GRMZM2G124455_P01, GRMZM2G129761_P01, GRMZM2G139680_P01, GRMZM2G163641_P01, GRMZM2G135893_P01, GRMZM2G004211_P01, GRMZM2G012479_P01, GRMZM5G826194_P02, GRMZM2G042080_P01, GRMZM2G120517_P02
GO:0098869	cellular oxidant detoxification	BIOLOGICAL_PROCESS	0.0292395	12	71	1648	4900	GRMZM5G864424_P01, GRMZM2G460406_P01, GRMZM2G124455_P01, GRMZM2G129761_P01, GRMZM2G139680_P01, GRMZM2G163641_P01, GRMZM2G135893_P01, GRMZM2G004211_P01, GRMZM2G012479_P01, GRMZM5G826194_P02, GRMZM2G042080_P01, GRMZM2G120517_P02
GO:0016054	organic acid catabolic process	BIOLOGICAL_PROCESS	0.0490228	12	67	1648	4904	GRMZM2G049811_P01, GRMZM2G164141_P02, GRMZM2G124353_P01, GRMZM2G160541_P02, GRMZM2G033626_P02, GRMZM2G074604_P01, GRMZM2G000753_P01, GRMZM5G828302_P03, GRMZM5G864319_P01, GRMZM2G052389_P01, GRMZM2G441347_P01, GRMZM2G119249_P02
GO:0046395	carboxylic acid catabolic process	BIOLOGICAL_PROCESS	0.0490228	12	67	1648	4904	GRMZM2G049811_P01, GRMZM2G164141_P02, GRMZM2G124353_P01, GRMZM2G160541_P02, GRMZM2G033626_P02, GRMZM2G074604_P01, GRMZM2G000753_P01, GRMZM5G828302_P03, GRMZM5G864319_P01, GRMZM2G052389_P01, GRMZM2G441347_P01, GRMZM2G119249_P02
GO:0005048	signal sequence binding	MOLECULAR_FUNCTION	0.00167991	12	9	1648	4962	GRMZM2G066650_P01, GRMZM2G010362_P01, GRMZM2G138419_P01, GRMZM2G376731_P01, GRMZM2G121022_P03, GRMZM2G084767_P01, GRMZM5G887631_P01, GRMZM2G033619_P01, GRMZM2G091119_P01, GRMZM2G098674_P01, GRMZM2G009845_P02, GRMZM2G088231_P01
GO:0030246	carbohydrate binding	MOLECULAR_FUNCTION	0.0126826	12	76	1648	4895	GRMZM2G086003_P01, GRMZM2G001363_P01, GRMZM2G000660_P01, GRMZM2G169184_P01, GRMZM2G034575_P01, GRMZM2G176225_P01, GRMZM2G143791_P01, GRMZM2G168506_P01, GRMZM2G074687_P01, GRMZM2G062396_P01, GRMZM5G858249_P01, GRMZM2G123714_P01
GO:0016209	antioxidant activity	MOLECULAR_FUNCTION	0.0375326	12	68	1648	4903	GRMZM5G864424_P01, GRMZM2G460406_P01, GRMZM2G124455_P01, GRMZM2G129761_P01, GRMZM2G139680_P01, GRMZM2G163641_P01, GRMZM2G135893_P01, GRMZM2G004211_P01, GRMZM2G012479_P01, GRMZM5G826194_P02, GRMZM2G042080_P01, GRMZM2G120517_P02
GO:0030433	ubiquitin-dependent ERAD pathway	BIOLOGICAL_PROCESS	3.95499e-05	11	3	1649	4968	GRMZM2G074037_P01, GRMZM2G150201_P03, GRMZM2G038126_P01, GRMZM2G051262_P01, GRMZM2G110185_P02, GRMZM2G056569_P01, GRMZM2G032505_P03, GRMZM2G104373_P01, GRMZM2G027282_P01, GRMZM2G107362_P02, GRMZM2G171604_P01
GO:0036503	ERAD pathway	BIOLOGICAL_PROCESS	3.95499e-05	11	3	1649	4968	GRMZM2G074037_P01, GRMZM2G150201_P03, GRMZM2G038126_P01, GRMZM2G051262_P01, GRMZM2G110185_P02, GRMZM2G056569_P01, GRMZM2G032505_P03, GRMZM2G104373_P01, GRMZM2G027282_P01, GRMZM2G107362_P02, GRMZM2G171604_P01
GO:0009407	toxin catabolic process	BIOLOGICAL_PROCESS	0.000283801	11	5	1649	4966	GRMZM2G475059_P01, GRMZM2G178079_P02, GRMZM2G335618_P01, GRMZM2G097989_P01, GRMZM2G330635_P01, GRMZM2G416632_P01, GRMZM2G447632_P01, GRMZM2G363540_P01, GRMZM2G308687_P01, GRMZM2G146475_P01, GRMZM2G428168_P01
GO:0006352	DNA-templated transcription, initiation	BIOLOGICAL_PROCESS	0.00228241	11	8	1649	4963	GRMZM2G074037_P01, GRMZM2G038126_P01, GRMZM2G110185_P02, GRMZM2G151549_P01, GRMZM2G056569_P01, GRMZM2G038313_P01, GRMZM2G032505_P03, GRMZM2G104373_P01, GRMZM2G027282_P01, GRMZM2G107362_P02, GRMZM2G171604_P01
GO:0042176	regulation of protein catabolic process	BIOLOGICAL_PROCESS	0.0039346	11	9	1649	4962	GRMZM2G074037_P01, GRMZM2G180578_P01, GRMZM2G038126_P01, GRMZM2G110185_P02, GRMZM2G056569_P01, GRMZM2G119761_P01, GRMZM2G032505_P03, GRMZM2G104373_P01, GRMZM2G027282_P01, GRMZM2G107362_P02, GRMZM2G171604_P01
GO:0045944	positive regulation of transcription by RNA polymerase II	BIOLOGICAL_PROCESS	0.0039346	11	9	1649	4962	GRMZM2G074037_P01, GRMZM2G032336_P01, GRMZM2G000623_P02, GRMZM2G038126_P01, GRMZM2G110185_P02, GRMZM2G056569_P01, GRMZM2G032505_P03, GRMZM2G104373_P01, GRMZM2G027282_P01, GRMZM2G107362_P02, GRMZM2G171604_P01
GO:0006446	regulation of translational initiation	BIOLOGICAL_PROCESS	0.00874583	11	10	1649	4961	GRMZM2G422651_P01, GRMZM2G064133_P01, GRMZM2G151549_P01, GRMZM2G070487_P03, GRMZM2G038313_P01, GRMZM2G336815_P01, GRMZM2G100120_P06, GRMZM2G028834_P03, GRMZM2G025214_P02, GRMZM2G153181_P01, GRMZM2G093050_P01
GO:0010431	seed maturation	BIOLOGICAL_PROCESS	0.0117141	11	11	1649	4960	GRMZM2G066290_P01, GRMZM2G049342_P01, GRMZM2G151549_P01, GRMZM2G129761_P01, GRMZM2G083689_P01, GRMZM2G038313_P01, AC155496.2_FGP009, GRMZM2G008273_P01, GRMZM2G152686_P01, GRMZM2G033526_P01, GRMZM2G168629_P01
GO:0048878	chemical homeostasis	BIOLOGICAL_PROCESS	0.0141854	11	70	1649	4901	AC209208.3_FGP002, GRMZM5G839592_P03, GRMZM2G000166_P01, GRMZM2G058910_P01, GRMZM5G879240_P01, GRMZM2G074687_P01, GRMZM2G026391_P02, GRMZM5G864319_P01, GRMZM2G156068_P01, GRMZM2G052389_P01, GRMZM2G074267_P01
GO:0000226	microtubule cytoskeleton organization	BIOLOGICAL_PROCESS	0.0365821	11	14	1649	4957	GRMZM2G115766_P01, GRMZM2G094388_P01, GRMZM2G078933_P01, GRMZM2G158136_P01, GRMZM5G816015_P01, GRMZM2G083689_P01, GRMZM2G117746_P01, GRMZM2G140342_P01, GRMZM2G465169_P02, GRMZM2G096092_P01, GRMZM2G071518_P01
GO:0046961	proton-transporting ATPase activity, rotational mechanism	MOLECULAR_FUNCTION	0.000114652	11	4	1649	4967	GRMZM2G030167_P01, GRMZM2G701207_P01, GRMZM2G019999_P01, GRMZM2G069458_P01, GRMZM2G008232_P01, GRMZM2G058910_P01, GRMZM2G163233_P04, GRMZM2G321725_P02, GRMZM5G879240_P01, GRMZM2G048907_P01, GRMZM2G070360_P01
GO:0008139	nuclear localization sequence binding	MOLECULAR_FUNCTION	0.000622424	11	6	1649	4965	GRMZM2G066650_P01, GRMZM2G010362_P01, GRMZM2G138419_P01, GRMZM2G376731_P01, GRMZM2G084767_P01, GRMZM5G887631_P01, GRMZM2G033619_P01, GRMZM2G091119_P01, GRMZM2G098674_P01, GRMZM2G009845_P02, GRMZM2G088231_P01
GO:0036442	proton-exporting ATPase activity	MOLECULAR_FUNCTION	0.0117141	11	11	1649	4960	GRMZM2G030167_P01, GRMZM2G701207_P01, GRMZM2G019999_P01, GRMZM2G069458_P01, GRMZM2G008232_P01, GRMZM2G058910_P01, GRMZM2G163233_P04, GRMZM2G321725_P02, GRMZM5G879240_P01, GRMZM2G048907_P01, GRMZM2G070360_P01
GO:0015986	ATP synthesis coupled proton transport	BIOLOGICAL_PROCESS	0.00309701	10	7	1650	4964	GRMZM2G069458_P01, GRMZM5G825759_P01, GRMZM2G025171_P01, GRMZM2G058910_P01, GRMZM2G157018_P01, GRMZM2G321725_P02, GRMZM5G879240_P01, AC194341.4_FGP002, GRMZM2G048907_P01, GRMZM2G156068_P01
GO:0015985	energy coupled proton transport, down electrochemical gradient	BIOLOGICAL_PROCESS	0.00309701	10	7	1650	4964	GRMZM2G069458_P01, GRMZM5G825759_P01, GRMZM2G025171_P01, GRMZM2G058910_P01, GRMZM2G157018_P01, GRMZM2G321725_P02, GRMZM5G879240_P01, AC194341.4_FGP002, GRMZM2G048907_P01, GRMZM2G156068_P01
GO:0031331	positive regulation of cellular catabolic process	BIOLOGICAL_PROCESS	0.00079289	10	5	1650	4966	GRMZM2G074037_P01, GRMZM2G038126_P01, GRMZM2G110185_P02, GRMZM2G056569_P01, GRMZM2G032505_P03, GRMZM2G382106_P01, GRMZM2G104373_P01, GRMZM2G027282_P01, GRMZM2G107362_P02, GRMZM2G171604_P01
GO:0009896	positive regulation of catabolic process	BIOLOGICAL_PROCESS	0.00079289	10	5	1650	4966	GRMZM2G074037_P01, GRMZM2G038126_P01, GRMZM2G110185_P02, GRMZM2G056569_P01, GRMZM2G032505_P03, GRMZM2G382106_P01, GRMZM2G104373_P01, GRMZM2G027282_P01, GRMZM2G107362_P02, GRMZM2G171604_P01
GO:0016126	sterol biosynthetic process	BIOLOGICAL_PROCESS	0.00164137	10	6	1650	4965	GRMZM2G481843_P01, GRMZM2G057000_P03, GRMZM2G126682_P01, GRMZM2G003853_P01, GRMZM2G168681_P01, GRMZM2G098569_P01, GRMZM2G023652_P01, GRMZM2G075701_P01, GRMZM2G122810_P05, GRMZM5G899349_P02
GO:0000910	cytokinesis	BIOLOGICAL_PROCESS	0.0169844	10	10	1650	4961	GRMZM2G314647_P01, GRMZM2G029486_P01, GRMZM2G049342_P01, GRMZM2G149717_P01, GRMZM2G083689_P01, GRMZM2G022625_P02, GRMZM2G074466_P01, GRMZM2G117746_P01, GRMZM2G069726_P01, GRMZM2G465169_P02
GO:0051338	regulation of transferase activity	BIOLOGICAL_PROCESS	0.0441777	10	12	1650	4959	GRMZM2G128613_P01, GRMZM2G082962_P01, GRMZM2G143213_P02, GRMZM2G092627_P01, GRMZM2G139341_P01, GRMZM2G174170_P02, GRMZM2G103250_P01, GRMZM2G175272_P01, GRMZM2G063369_P01, GRMZM2G032315_P01
GO:0043022	ribosome binding	MOLECULAR_FUNCTION	0.0169844	10	10	1650	4961	GRMZM2G027021_P01, GRMZM2G145905_P01, GRMZM2G038494_P01, GRMZM2G070723_P02, GRMZM2G092627_P01, GRMZM2G139341_P01, GRMZM2G100120_P06, GRMZM2G160801_P01, GRMZM2G058138_P01, GRMZM2G146115_P01
GO:0004842	ubiquitin-protein transferase activity	MOLECULAR_FUNCTION	0.0372184	10	60	1650	4911	GRMZM2G000623_P02, GRMZM2G361074_P01, GRMZM2G138103_P01, GRMZM5G862131_P01, GRMZM2G380184_P01, AC155496.2_FGP009, GRMZM5G828302_P03, GRMZM2G030805_P01, GRMZM2G134480_P01, GRMZM2G166694_P04
GO:0019787	ubiquitin-like protein transferase activity	MOLECULAR_FUNCTION	0.0372184	10	60	1650	4911	GRMZM2G000623_P02, GRMZM2G361074_P01, GRMZM2G138103_P01, GRMZM5G862131_P01, GRMZM2G380184_P01, AC155496.2_FGP009, GRMZM5G828302_P03, GRMZM2G030805_P01, GRMZM2G134480_P01, GRMZM2G166694_P04
GO:0009832	plant-type cell wall biogenesis	BIOLOGICAL_PROCESS	0.00747362	9	7	1651	4964	GRMZM2G314647_P01, GRMZM5G826714_P01, GRMZM2G027862_P01, GRMZM2G149717_P01, GRMZM2G142097_P02, GRMZM2G057000_P03, GRMZM2G173341_P03, GRMZM2G087326_P01, GRMZM2G445905_P03
GO:0051123	RNA polymerase II transcriptional preinitiation complex assembly	BIOLOGICAL_PROCESS	3.79914e-06	9	0	1651	4971	GRMZM2G074037_P01, GRMZM2G038126_P01, GRMZM2G110185_P02, GRMZM2G056569_P01, GRMZM2G032505_P03, GRMZM2G104373_P01, GRMZM2G027282_P01, GRMZM2G107362_P02, GRMZM2G171604_P01
GO:0045898	regulation of RNA polymerase II transcriptional preinitiation complex assembly	BIOLOGICAL_PROCESS	3.79914e-06	9	0	1651	4971	GRMZM2G074037_P01, GRMZM2G038126_P01, GRMZM2G110185_P02, GRMZM2G056569_P01, GRMZM2G032505_P03, GRMZM2G104373_P01, GRMZM2G027282_P01, GRMZM2G107362_P02, GRMZM2G171604_P01
GO:0045899	positive regulation of RNA polymerase II transcriptional preinitiation complex assembly	BIOLOGICAL_PROCESS	3.79914e-06	9	0	1651	4971	GRMZM2G074037_P01, GRMZM2G038126_P01, GRMZM2G110185_P02, GRMZM2G056569_P01, GRMZM2G032505_P03, GRMZM2G104373_P01, GRMZM2G027282_P01, GRMZM2G107362_P02, GRMZM2G171604_P01
GO:0070897	DNA-templated transcriptional preinitiation complex assembly	BIOLOGICAL_PROCESS	3.79914e-06	9	0	1651	4971	GRMZM2G074037_P01, GRMZM2G038126_P01, GRMZM2G110185_P02, GRMZM2G056569_P01, GRMZM2G032505_P03, GRMZM2G104373_P01, GRMZM2G027282_P01, GRMZM2G107362_P02, GRMZM2G171604_P01
GO:2000142	regulation of DNA-templated transcription, initiation	BIOLOGICAL_PROCESS	2.94666e-05	9	1	1651	4970	GRMZM2G074037_P01, GRMZM2G038126_P01, GRMZM2G110185_P02, GRMZM2G056569_P01, GRMZM2G032505_P03, GRMZM2G104373_P01, GRMZM2G027282_P01, GRMZM2G107362_P02, GRMZM2G171604_P01
GO:2000144	positive regulation of DNA-templated transcription, initiation	BIOLOGICAL_PROCESS	2.94666e-05	9	1	1651	4970	GRMZM2G074037_P01, GRMZM2G038126_P01, GRMZM2G110185_P02, GRMZM2G056569_P01, GRMZM2G032505_P03, GRMZM2G104373_P01, GRMZM2G027282_P01, GRMZM2G107362_P02, GRMZM2G171604_P01
GO:0060260	regulation of transcription initiation from RNA polymerase II promoter	BIOLOGICAL_PROCESS	2.94666e-05	9	1	1651	4970	GRMZM2G074037_P01, GRMZM2G038126_P01, GRMZM2G110185_P02, GRMZM2G056569_P01, GRMZM2G032505_P03, GRMZM2G104373_P01, GRMZM2G027282_P01, GRMZM2G107362_P02, GRMZM2G171604_P01
GO:0060261	positive regulation of transcription initiation from RNA polymerase II promoter	BIOLOGICAL_PROCESS	2.94666e-05	9	1	1651	4970	GRMZM2G074037_P01, GRMZM2G038126_P01, GRMZM2G110185_P02, GRMZM2G056569_P01, GRMZM2G032505_P03, GRMZM2G104373_P01, GRMZM2G027282_P01, GRMZM2G107362_P02, GRMZM2G171604_P01
GO:1901800	positive regulation of proteasomal protein catabolic process	BIOLOGICAL_PROCESS	0.000987943	9	4	1651	4967	GRMZM2G074037_P01, GRMZM2G038126_P01, GRMZM2G110185_P02, GRMZM2G056569_P01, GRMZM2G032505_P03, GRMZM2G104373_P01, GRMZM2G027282_P01, GRMZM2G107362_P02, GRMZM2G171604_P01
GO:0045732	positive regulation of protein catabolic process	BIOLOGICAL_PROCESS	0.000987943	9	4	1651	4967	GRMZM2G074037_P01, GRMZM2G038126_P01, GRMZM2G110185_P02, GRMZM2G056569_P01, GRMZM2G032505_P03, GRMZM2G104373_P01, GRMZM2G027282_P01, GRMZM2G107362_P02, GRMZM2G171604_P01
GO:1903362	regulation of cellular protein catabolic process	BIOLOGICAL_PROCESS	0.000987943	9	4	1651	4967	GRMZM2G074037_P01, GRMZM2G038126_P01, GRMZM2G110185_P02, GRMZM2G056569_P01, GRMZM2G032505_P03, GRMZM2G104373_P01, GRMZM2G027282_P01, GRMZM2G107362_P02, GRMZM2G171604_P01
GO:1903364	positive regulation of cellular protein catabolic process	BIOLOGICAL_PROCESS	0.000987943	9	4	1651	4967	GRMZM2G074037_P01, GRMZM2G038126_P01, GRMZM2G110185_P02, GRMZM2G056569_P01, GRMZM2G032505_P03, GRMZM2G104373_P01, GRMZM2G027282_P01, GRMZM2G107362_P02, GRMZM2G171604_P01
GO:0061136	regulation of proteasomal protein catabolic process	BIOLOGICAL_PROCESS	0.000987943	9	4	1651	4967	GRMZM2G074037_P01, GRMZM2G038126_P01, GRMZM2G110185_P02, GRMZM2G056569_P01, GRMZM2G032505_P03, GRMZM2G104373_P01, GRMZM2G027282_P01, GRMZM2G107362_P02, GRMZM2G171604_P01
GO:0045862	positive regulation of proteolysis	BIOLOGICAL_PROCESS	0.000987943	9	4	1651	4967	GRMZM2G074037_P01, GRMZM2G038126_P01, GRMZM2G110185_P02, GRMZM2G056569_P01, GRMZM2G032505_P03, GRMZM2G104373_P01, GRMZM2G027282_P01, GRMZM2G107362_P02, GRMZM2G171604_P01
GO:1903052	positive regulation of proteolysis involved in cellular protein catabolic process	BIOLOGICAL_PROCESS	0.000987943	9	4	1651	4967	GRMZM2G074037_P01, GRMZM2G038126_P01, GRMZM2G110185_P02, GRMZM2G056569_P01, GRMZM2G032505_P03, GRMZM2G104373_P01, GRMZM2G027282_P01, GRMZM2G107362_P02, GRMZM2G171604_P01
GO:1903050	regulation of proteolysis involved in cellular protein catabolic process	BIOLOGICAL_PROCESS	0.000987943	9	4	1651	4967	GRMZM2G074037_P01, GRMZM2G038126_P01, GRMZM2G110185_P02, GRMZM2G056569_P01, GRMZM2G032505_P03, GRMZM2G104373_P01, GRMZM2G027282_P01, GRMZM2G107362_P02, GRMZM2G171604_P01
GO:0006607	NLS-bearing protein import into nucleus	BIOLOGICAL_PROCESS	0.00215293	9	5	1651	4966	GRMZM2G066650_P01, GRMZM2G138419_P01, GRMZM2G376731_P01, GRMZM2G084767_P01, GRMZM5G887631_P01, GRMZM2G033619_P01, GRMZM2G091119_P01, GRMZM2G009845_P02, GRMZM2G088231_P01
GO:0030490	maturation of SSU-rRNA	BIOLOGICAL_PROCESS	0.00215293	9	5	1651	4966	GRMZM6G832911_P01, GRMZM2G377797_P01, GRMZM5G868062_P04, GRMZM2G045818_P01, GRMZM2G171426_P01, GRMZM2G093574_P02, GRMZM2G091383_P01, GRMZM2G094074_P02, GRMZM2G069762_P01
GO:0006367	transcription initiation from RNA polymerase II promoter	BIOLOGICAL_PROCESS	0.00419298	9	6	1651	4965	GRMZM2G074037_P01, GRMZM2G038126_P01, GRMZM2G110185_P02, GRMZM2G056569_P01, GRMZM2G032505_P03, GRMZM2G104373_P01, GRMZM2G027282_P01, GRMZM2G107362_P02, GRMZM2G171604_P01
GO:0030001	metal ion transport	BIOLOGICAL_PROCESS	0.00527458	9	69	1651	4902	GRMZM2G481843_P01, GRMZM2G139880_P01, GRMZM2G019999_P01, GRMZM2G000166_P01, GRMZM2G356938_P01, GRMZM2G163233_P04, GRMZM2G060952_P01, GRMZM2G115750_P01, GRMZM2G060870_P02
GO:0000028	ribosomal small subunit assembly	BIOLOGICAL_PROCESS	0.00747362	9	7	1651	4964	GRMZM2G073150_P01, GRMZM2G045818_P01, GRMZM2G102075_P01, GRMZM2G043737_P01, GRMZM2G086906_P01, GRMZM2G156673_P01, GRMZM2G078985_P01, GRMZM2G094074_P02, GRMZM2G069762_P01
GO:0051788	response to misfolded protein	BIOLOGICAL_PROCESS	0.00747362	9	7	1651	4964	GRMZM2G151549_P01, GRMZM2G033626_P02, GRMZM5G839592_P03, GRMZM2G064695_P04, AC199782.5_FGP001, GRMZM2G038313_P01, GRMZM2G157018_P01, GRMZM2G156068_P01, GRMZM2G024310_P01
GO:0019318	hexose metabolic process	BIOLOGICAL_PROCESS	0.0131363	9	63	1651	4908	GRMZM2G130230_P03, GRMZM2G117642_P02, GRMZM2G071630_P01, GRMZM2G064695_P04, GRMZM2G076075_P02, GRMZM2G159369_P01, GRMZM2G173341_P03, GRMZM2G128171_P03, GRMZM2G165919_P01
GO:1902410	mitotic cytokinetic process	BIOLOGICAL_PROCESS	0.024925	9	9	1651	4962	GRMZM2G314647_P01, GRMZM2G029486_P01, GRMZM2G049342_P01, GRMZM2G149717_P01, GRMZM2G083689_P01, GRMZM2G022625_P02, GRMZM2G074466_P01, GRMZM2G117746_P01, GRMZM2G069726_P01
GO:0000281	mitotic cytokinesis	BIOLOGICAL_PROCESS	0.024925	9	9	1651	4962	GRMZM2G314647_P01, GRMZM2G029486_P01, GRMZM2G049342_P01, GRMZM2G149717_P01, GRMZM2G083689_P01, GRMZM2G022625_P02, GRMZM2G074466_P01, GRMZM2G117746_P01, GRMZM2G069726_P01
GO:0032506	cytokinetic process	BIOLOGICAL_PROCESS	0.024925	9	9	1651	4962	GRMZM2G314647_P01, GRMZM2G029486_P01, GRMZM2G049342_P01, GRMZM2G149717_P01, GRMZM2G083689_P01, GRMZM2G022625_P02, GRMZM2G074466_P01, GRMZM2G117746_P01, GRMZM2G069726_P01
GO:0042493	response to drug	BIOLOGICAL_PROCESS	0.0322854	9	58	1651	4913	GRMZM2G060561_P02, GRMZM2G129218_P01, GRMZM2G173416_P02, GRMZM2G025171_P01, GRMZM2G152908_P01, GRMZM2G021816_P01, GRMZM2G168898_P01, GRMZM2G341404_P01, GRMZM2G168588_P01
GO:0061640	cytoskeleton-dependent cytokinesis	BIOLOGICAL_PROCESS	0.0329577	9	10	1651	4961	GRMZM2G314647_P01, GRMZM2G029486_P01, GRMZM2G049342_P01, GRMZM2G149717_P01, GRMZM2G083689_P01, GRMZM2G022625_P02, GRMZM2G074466_P01, GRMZM2G117746_P01, GRMZM2G069726_P01
GO:0036402	proteasome-activating ATPase activity	MOLECULAR_FUNCTION	3.79914e-06	9	0	1651	4971	GRMZM2G074037_P01, GRMZM2G038126_P01, GRMZM2G110185_P02, GRMZM2G056569_P01, GRMZM2G032505_P03, GRMZM2G104373_P01, GRMZM2G027282_P01, GRMZM2G107362_P02, GRMZM2G171604_P01
GO:0017025	TBP-class protein binding	MOLECULAR_FUNCTION	2.94666e-05	9	1	1651	4970	GRMZM2G074037_P01, GRMZM2G038126_P01, GRMZM2G110185_P02, GRMZM2G056569_P01, GRMZM2G032505_P03, GRMZM2G104373_P01, GRMZM2G027282_P01, GRMZM2G107362_P02, GRMZM2G171604_P01
GO:0051536	iron-sulfur cluster binding	MOLECULAR_FUNCTION	0.000254547	9	84	1651	4887	GRMZM2G067992_P01, GRMZM2G023194_P01, GRMZM2G064212_P02, GRMZM2G038487_P03, GRMZM2G139803_P01, GRMZM2G168412_P02, GRMZM2G022248_P01, GRMZM2G131769_P01, GRMZM2G452523_P01
GO:0051540	metal cluster binding	MOLECULAR_FUNCTION	0.000254547	9	84	1651	4887	GRMZM2G067992_P01, GRMZM2G023194_P01, GRMZM2G064212_P02, GRMZM2G038487_P03, GRMZM2G139803_P01, GRMZM2G168412_P02, GRMZM2G022248_P01, GRMZM2G131769_P01, GRMZM2G452523_P01
GO:0008134	transcription factor binding	MOLECULAR_FUNCTION	0.000390938	9	3	1651	4968	GRMZM2G074037_P01, GRMZM2G038126_P01, GRMZM2G110185_P02, GRMZM2G056569_P01, GRMZM2G032505_P03, GRMZM2G104373_P01, GRMZM2G027282_P01, GRMZM2G107362_P02, GRMZM2G171604_P01
GO:0005484	SNAP receptor activity	MOLECULAR_FUNCTION	0.0198056	9	8	1651	4963	GRMZM5G846196_P01, GRMZM2G387076_P02, GRMZM2G330650_P01, GRMZM2G115775_P01, GRMZM2G108087_P01, GRMZM5G837058_P01, GRMZM2G102903_P02, GRMZM2G330772_P02, GRMZM2G010836_P02
GO:0005200	structural constituent of cytoskeleton	MOLECULAR_FUNCTION	0.0198056	9	8	1651	4963	GRMZM2G071790_P05, GRMZM2G172932_P03, GRMZM2G152466_P01, GRMZM2G164696_P01, GRMZM2G096092_P01, GRMZM2G083243_P01, GRMZM2G071518_P01, GRMZM2G043822_P03, AC195340.3_FGP001
GO:0046912	transferase activity, transferring acyl groups, acyl groups converted into alkyl on transfer	MOLECULAR_FUNCTION	0.0329577	9	10	1651	4961	GRMZM2G064023_P02, GRMZM2G063851_P01, GRMZM2G063909_P03, GRMZM2G063909_P01, GRMZM2G034083_P01, AC199782.5_FGP002, GRMZM6G326542_P01, GRMZM2G087207_P01, GRMZM2G107082_P01
GO:0042451	purine nucleoside biosynthetic process	BIOLOGICAL_PROCESS	0.0173314	8	7	1652	4964	GRMZM2G100084_P01, GRMZM2G135132_P01, GRMZM2G324285_P01, GRMZM2G069772_P01, GRMZM2G137724_P01, GRMZM2G540538_P01, GRMZM2G178576_P02, GRMZM2G136283_P01
GO:0046129	purine ribonucleoside biosynthetic process	BIOLOGICAL_PROCESS	0.0173314	8	7	1652	4964	GRMZM2G100084_P01, GRMZM2G135132_P01, GRMZM2G324285_P01, GRMZM2G069772_P01, GRMZM2G137724_P01, GRMZM2G540538_P01, GRMZM2G178576_P02, GRMZM2G136283_P01
GO:0042743	hydrogen peroxide metabolic process	BIOLOGICAL_PROCESS	0.00205043	8	68	1652	4903	GRMZM2G133359_P01, GRMZM2G460406_P01, GRMZM2G409627_P01, GRMZM2G025171_P01, GRMZM2G139680_P01, GRMZM2G004211_P01, AC204530.4_FGP002, GRMZM2G120517_P02
GO:0043248	proteasome assembly	BIOLOGICAL_PROCESS	0.00278294	8	4	1652	4967	GRMZM5G868757_P04, GRMZM2G121452_P01, GRMZM2G086132_P01, GRMZM2G033626_P02, AC199782.5_FGP001, GRMZM2G083076_P03, GRMZM2G095326_P01, GRMZM2G160770_P01
GO:0000462	maturation of SSU-rRNA from tricistronic rRNA transcript (SSU-rRNA, 5.8S rRNA, LSU-rRNA)	BIOLOGICAL_PROCESS	0.00565492	8	5	1652	4966	GRMZM6G832911_P01, GRMZM2G377797_P01, GRMZM2G045818_P01, GRMZM2G171426_P01, GRMZM2G093574_P02, GRMZM2G091383_P01, GRMZM2G094074_P02, GRMZM2G069762_P01
GO:0006890	retrograde vesicle-mediated transport, Golgi to ER	BIOLOGICAL_PROCESS	0.047746	8	9	1652	4962	GRMZM2G149406_P01, GRMZM2G053319_P01, GRMZM2G110822_P01, GRMZM2G141587_P03, GRMZM2G028929_P02, GRMZM2G178916_P03, AC155622.2_FGP001, GRMZM5G825854_P01
GO:0051495	positive regulation of cytoskeleton organization	BIOLOGICAL_PROCESS	0.047746	8	9	1652	4962	GRMZM2G094388_P01, GRMZM2G078933_P01, GRMZM2G049342_P01, GRMZM2G342386_P02, AC204530.4_FGP002, GRMZM2G096092_P01, GRMZM2G168629_P01, GRMZM2G103599_P01
GO:0040008	regulation of growth	BIOLOGICAL_PROCESS	0.047746	8	9	1652	4962	GRMZM6G865522_P01, GRMZM2G049342_P01, GRMZM5G856734_P01, GRMZM2G142097_P02, GRMZM2G057000_P03, GRMZM2G141931_P01, GRMZM2G162413_P02, GRMZM2G399073_P02
GO:0016684	oxidoreductase activity, acting on peroxide as acceptor	MOLECULAR_FUNCTION	0.0271291	8	55	1652	4916	GRMZM2G460406_P01, GRMZM2G129761_P01, GRMZM2G139680_P01, GRMZM2G163641_P01, GRMZM2G135893_P01, GRMZM2G004211_P01, GRMZM2G012479_P01, GRMZM2G120517_P02
GO:0004601	peroxidase activity	MOLECULAR_FUNCTION	0.0271291	8	55	1652	4916	GRMZM2G460406_P01, GRMZM2G129761_P01, GRMZM2G139680_P01, GRMZM2G163641_P01, GRMZM2G135893_P01, GRMZM2G004211_P01, GRMZM2G012479_P01, GRMZM2G120517_P02
GO:0000463	maturation of LSU-rRNA from tricistronic rRNA transcript (SSU-rRNA, 5.8S rRNA, LSU-rRNA)	BIOLOGICAL_PROCESS	6.10349e-05	7	0	1653	4971	GRMZM5G868433_P01, GRMZM2G068471_P01, GRMZM2G100225_P01, GRMZM2G050501_P01, GRMZM2G178807_P01, GRMZM2G043279_P01, GRMZM2G094051_P03
GO:0000027	ribosomal large subunit assembly	BIOLOGICAL_PROCESS	0.00757465	7	4	1653	4967	GRMZM2G054201_P01, GRMZM2G024647_P01, GRMZM2G027451_P04, GRMZM2G074898_P01, GRMZM2G003384_P01, GRMZM2G163081_P01, GRMZM2G119471_P01
GO:0022611	dormancy process	BIOLOGICAL_PROCESS	0.0243492	7	6	1653	4965	GRMZM2G151549_P01, GRMZM2G129761_P01, GRMZM2G083689_P01, GRMZM2G038313_P01, AC155496.2_FGP009, GRMZM2G008273_P01, GRMZM2G168629_P01
GO:0010162	seed dormancy process	BIOLOGICAL_PROCESS	0.0243492	7	6	1653	4965	GRMZM2G151549_P01, GRMZM2G129761_P01, GRMZM2G083689_P01, GRMZM2G038313_P01, AC155496.2_FGP009, GRMZM2G008273_P01, GRMZM2G168629_P01
GO:0019904	protein domain specific binding	MOLECULAR_FUNCTION	0.00757465	7	4	1653	4967	GRMZM2G153823_P01, AC217050.4_FGP006, GRMZM2G078641_P01, GRMZM2G140545_P01, GRMZM2G145213_P01, GRMZM2G408768_P01, GRMZM5G866082_P02
GO:0004659	prenyltransferase activity	MOLECULAR_FUNCTION	0.0142831	7	5	1653	4966	GRMZM2G149317_P01, GRMZM2G004131_P01, GRMZM2G029396_P01, GRMZM2G126161_P01, GRMZM2G168681_P01, GRMZM2G098569_P01, AC194970.5_FGP001
GO:0005544	calcium-dependent phospholipid binding	MOLECULAR_FUNCTION	0.0142831	7	5	1653	4966	GRMZM2G108149_P01, GRMZM2G009136_P01, GRMZM2G132461_P02, GRMZM2G064993_P01, GRMZM2G061950_P01, GRMZM2G132442_P03, GRMZM2G067752_P01
GO:0051187	cofactor catabolic process	BIOLOGICAL_PROCESS	0.00218531	6	59	1654	4912	GRMZM2G139680_P01, GRMZM2G460406_P01, GRMZM2G004211_P01, GRMZM2G377115_P01, GRMZM2G101004_P01, GRMZM2G120517_P02
GO:0006610	ribosomal protein import into nucleus	BIOLOGICAL_PROCESS	0.00423538	6	2	1654	4969	GRMZM2G138419_P01, GRMZM2G376731_P01, GRMZM2G084767_P01, GRMZM2G066650_P01, GRMZM5G887631_P01, GRMZM2G033619_P01
GO:0000060	protein import into nucleus, translocation	BIOLOGICAL_PROCESS	0.00423538	6	2	1654	4969	GRMZM2G138419_P01, GRMZM2G376731_P01, GRMZM2G084767_P01, GRMZM2G066650_P01, GRMZM5G887631_P01, GRMZM2G033619_P01
GO:0006892	post-Golgi vesicle-mediated transport	BIOLOGICAL_PROCESS	0.010018	6	3	1654	4968	GRMZM2G099056_P01, GRMZM2G330650_P01, GRMZM2G102903_P02, GRMZM5G839592_P03, GRMZM2G137984_P01, GRMZM2G010836_P02
GO:0042026	protein refolding	BIOLOGICAL_PROCESS	0.0197791	6	4	1654	4967	AC215201.3_FGP005, GRMZM2G095252_P02, GRMZM2G416120_P01, GRMZM2G015989_P02, GRMZM2G042253_P01, GRMZM2G083716_P02
GO:0046417	chorismate metabolic process	BIOLOGICAL_PROCESS	0.0197791	6	4	1654	4967	GRMZM2G365160_P01, GRMZM2G124365_P01, GRMZM2G028369_P01, GRMZM2G573867_P01, GRMZM2G117707_P02, GRMZM2G161566_P01
GO:0042147	retrograde transport, endosome to Golgi	BIOLOGICAL_PROCESS	0.0197791	6	4	1654	4967	GRMZM2G330650_P01, GRMZM2G022876_P01, GRMZM2G102903_P02, GRMZM2G127756_P01, GRMZM2G137984_P01, GRMZM2G010836_P02
GO:0000059	obsolete protein import into nucleus, docking	BIOLOGICAL_PROCESS	0.0197791	6	4	1654	4967	0
GO:0016482	cytosolic transport	BIOLOGICAL_PROCESS	0.0344245	6	5	1654	4966	GRMZM2G330650_P01, GRMZM2G022876_P01, GRMZM2G102903_P02, GRMZM2G127756_P01, GRMZM2G137984_P01, GRMZM2G010836_P02
GO:0019632	shikimate metabolic process	BIOLOGICAL_PROCESS	0.0344245	6	5	1654	4966	GRMZM2G365160_P01, GRMZM2G573867_P01, GRMZM2G134256_P01, GRMZM2G117707_P02, GRMZM2G161566_P01, GRMZM2G119249_P02
GO:0006766	vitamin metabolic process	BIOLOGICAL_PROCESS	0.0447738	6	42	1654	4929	GRMZM2G099729_P01, GRMZM2G061988_P01, GRMZM2G069758_P01, GRMZM2G156803_P01, GRMZM2G452523_P01, GRMZM2G119249_P02
GO:0009064	glutamine family amino acid metabolic process	BIOLOGICAL_PROCESS	0.0447738	6	42	1654	4929	GRMZM2G050371_P01, GRMZM2G119219_P03, GRMZM2G124353_P01, GRMZM2G171383_P01, GRMZM2G024104_P01, GRMZM2G124059_P01
GO:0009063	cellular amino acid catabolic process	BIOLOGICAL_PROCESS	0.0447738	6	42	1654	4929	GRMZM2G000753_P01, GRMZM2G124353_P01, GRMZM2G160541_P02, GRMZM2G074604_P01, GRMZM2G441347_P01, GRMZM2G119249_P02
GO:0016810	hydrolase activity, acting on carbon-nitrogen (but not peptide) bonds	MOLECULAR_FUNCTION	0.0061762	6	53	1654	4918	GRMZM2G334457_P01, GRMZM2G137724_P01, GRMZM2G021704_P02, GRMZM2G173416_P02, GRMZM2G082214_P01, GRMZM2G156803_P01
GO:0140103	catalytic activity, acting on a glycoprotein	MOLECULAR_FUNCTION	0.010018	6	3	1654	4968	GRMZM2G115451_P02, GRMZM2G040843_P01, GRMZM2G426275_P01, GRMZM2G477236_P01, GRMZM2G027640_P01, GRMZM2G170842_P01
GO:0050660	flavin adenine dinucleotide binding	MOLECULAR_FUNCTION	0.0122292	6	49	1654	4922	GRMZM2G143008_P01, GRMZM2G143883_P06, GRMZM2G060952_P01, GRMZM5G864319_P01, GRMZM2G052389_P01, GRMZM2G057000_P03
GO:0016859	cis-trans isomerase activity	MOLECULAR_FUNCTION	0.032622	6	44	1654	4927	GRMZM2G117746_P01, GRMZM2G336858_P01, GRMZM2G084547_P01, GRMZM2G096585_P04, GRMZM2G138572_P01, GRMZM2G035922_P01
GO:0016759	cellulose synthase activity	MOLECULAR_FUNCTION	0.0344245	6	5	1654	4966	GRMZM2G027723_P01, GRMZM2G110145_P01, GRMZM2G018241_P01, GRMZM2G111642_P01, GRMZM2G445905_P03, GRMZM2G074546_P01
GO:0016760	cellulose synthase (UDP-forming) activity	MOLECULAR_FUNCTION	0.0344245	6	5	1654	4966	GRMZM2G027723_P01, GRMZM2G110145_P01, GRMZM2G018241_P01, GRMZM2G111642_P01, GRMZM2G445905_P03, GRMZM2G074546_P01
GO:0017001	antibiotic catabolic process	BIOLOGICAL_PROCESS	0.00216828	5	54	1655	4917	GRMZM2G049811_P01, GRMZM2G139680_P01, GRMZM2G460406_P01, GRMZM2G004211_P01, GRMZM2G120517_P02
GO:0048280	vesicle fusion with Golgi apparatus	BIOLOGICAL_PROCESS	0.00465028	5	1	1655	4970	GRMZM2G012600_P01, GRMZM2G330650_P01, GRMZM2G102903_P02, GRMZM2G174803_P01, GRMZM2G010836_P02
GO:0006896	Golgi to vacuole transport	BIOLOGICAL_PROCESS	0.00465028	5	1	1655	4970	GRMZM2G330650_P01, GRMZM2G102903_P02, GRMZM5G839592_P03, GRMZM2G137984_P01, GRMZM2G010836_P02
GO:0055082	cellular chemical homeostasis	BIOLOGICAL_PROCESS	0.00905982	5	46	1655	4925	GRMZM2G000166_P01, GRMZM2G058910_P01, GRMZM5G879240_P01, GRMZM2G074687_P01, AC209208.3_FGP002
GO:0032011	ARF protein signal transduction	BIOLOGICAL_PROCESS	0.0129132	5	2	1655	4969	GRMZM2G006474_P01, GRMZM2G335287_P01, GRMZM2G058870_P01, GRMZM2G082916_P01, GRMZM2G167318_P01
GO:0032012	regulation of ARF protein signal transduction	BIOLOGICAL_PROCESS	0.0129132	5	2	1655	4969	GRMZM2G006474_P01, GRMZM2G335287_P01, GRMZM2G058870_P01, GRMZM2G082916_P01, GRMZM2G167318_P01
GO:0051056	regulation of small GTPase mediated signal transduction	BIOLOGICAL_PROCESS	0.0129132	5	2	1655	4969	GRMZM2G006474_P01, GRMZM2G335287_P01, GRMZM2G058870_P01, GRMZM2G082916_P01, GRMZM2G167318_P01
GO:0046578	regulation of Ras protein signal transduction	BIOLOGICAL_PROCESS	0.0129132	5	2	1655	4969	GRMZM2G006474_P01, GRMZM2G335287_P01, GRMZM2G058870_P01, GRMZM2G082916_P01, GRMZM2G167318_P01
GO:0046037	GMP metabolic process	BIOLOGICAL_PROCESS	0.0129132	5	2	1655	4969	GRMZM2G100084_P01, GRMZM6G865522_P01, GRMZM2G136283_P01, GRMZM2G324285_P01, GRMZM2G069772_P01
GO:0007265	Ras protein signal transduction	BIOLOGICAL_PROCESS	0.0129132	5	2	1655	4969	GRMZM2G006474_P01, GRMZM2G335287_P01, GRMZM2G058870_P01, GRMZM2G082916_P01, GRMZM2G167318_P01
GO:0007051	spindle organization	BIOLOGICAL_PROCESS	0.0273763	5	3	1655	4968	GRMZM2G094388_P01, GRMZM2G078933_P01, GRMZM5G816015_P01, GRMZM2G096092_P01, GRMZM2G071518_P01
GO:0016042	lipid catabolic process	BIOLOGICAL_PROCESS	0.0364223	5	40	1655	4931	GRMZM2G164141_P02, GRMZM5G828302_P03, GRMZM5G864319_P01, GRMZM2G052389_P01, GRMZM2G033626_P02
GO:0008238	exopeptidase activity	MOLECULAR_FUNCTION	0.00216828	5	54	1655	4917	GRMZM2G064212_P02, GRMZM2G106165_P02, GRMZM2G075488_P02, GRMZM2G176396_P02, GRMZM2G061127_P01
GO:0005086	ARF guanyl-nucleotide exchange factor activity	MOLECULAR_FUNCTION	0.0129132	5	2	1655	4969	GRMZM2G006474_P01, GRMZM2G335287_P01, GRMZM2G058870_P01, GRMZM2G082916_P01, GRMZM2G167318_P01
GO:0016706	oxidoreductase activity, acting on paired donors, with incorporation or reduction of molecular oxygen, 2-oxoglutarate as one donor, and incorporation of one atom each of oxygen into both donors	MOLECULAR_FUNCTION	0.0129132	5	2	1655	4969	GRMZM2G152801_P01, GRMZM2G168506_P01, GRMZM2G086003_P01, GRMZM6G617209_P01, GRMZM2G062396_P01
GO:0033926	glycopeptide alpha-N-acetylgalactosaminidase activity	MOLECULAR_FUNCTION	0.0129132	5	2	1655	4969	GRMZM2G115451_P02, GRMZM2G040843_P01, GRMZM2G477236_P01, GRMZM2G027640_P01, GRMZM2G170842_P01
GO:0006820	anion transport	BIOLOGICAL_PROCESS	1.68707e-05	4	69	1656	4902	GRMZM2G064563_P02, GRMZM2G150201_P03, GRMZM2G025387_P01, GRMZM2G177812_P01
GO:0042744	hydrogen peroxide catabolic process	BIOLOGICAL_PROCESS	0.000942791	4	52	1656	4919	GRMZM2G139680_P01, GRMZM2G460406_P01, GRMZM2G004211_P01, GRMZM2G120517_P02
GO:0010731	protein glutathionylation	BIOLOGICAL_PROCESS	0.00391686	4	0	1656	4971	GRMZM2G043291_P02, GRMZM2G042639_P04, GRMZM5G826194_P02, GRMZM2G162486_P01
GO:0006438	valyl-tRNA aminoacylation	BIOLOGICAL_PROCESS	0.00391686	4	0	1656	4971	GRMZM2G117870_P01, GRMZM2G134756_P01, GRMZM2G106974_P01, GRMZM5G871297_P01
GO:0017196	N-terminal peptidyl-methionine acetylation	BIOLOGICAL_PROCESS	0.00391686	4	0	1656	4971	GRMZM2G442057_P01, GRMZM6G157558_P01, GRMZM2G047093_P01, GRMZM2G123159_P01
GO:0018206	peptidyl-methionine modification	BIOLOGICAL_PROCESS	0.00391686	4	0	1656	4971	GRMZM2G442057_P01, GRMZM6G157558_P01, GRMZM2G047093_P01, GRMZM2G123159_P01
GO:1901568	fatty acid derivative metabolic process	BIOLOGICAL_PROCESS	0.0156692	4	1	1656	4970	GRMZM2G114642_P01, GRMZM2G481843_P01, GRMZM2G101875_P01, GRMZM2G480516_P01
GO:0009958	positive gravitropism	BIOLOGICAL_PROCESS	0.0156692	4	1	1656	4970	GRMZM2G315375_P01, GRMZM2G462803_P02, GRMZM2G005753_P04, GRMZM5G839592_P03
GO:0007098	centrosome cycle	BIOLOGICAL_PROCESS	0.0377071	4	2	1656	4969	GRMZM2G094388_P01, GRMZM2G078933_P01, GRMZM2G096092_P01, GRMZM2G071518_P01
GO:0006177	GMP biosynthetic process	BIOLOGICAL_PROCESS	0.0377071	4	2	1656	4969	GRMZM2G100084_P01, GRMZM2G136283_P01, GRMZM2G324285_P01, GRMZM2G069772_P01
GO:0045931	positive regulation of mitotic cell cycle	BIOLOGICAL_PROCESS	0.0377071	4	2	1656	4969	GRMZM2G153769_P01, GRMZM2G094388_P01, GRMZM2G078933_P01, GRMZM2G008273_P01
GO:0033587	shikimate biosynthetic process	BIOLOGICAL_PROCESS	0.0377071	4	2	1656	4969	GRMZM2G365160_P01, GRMZM2G573867_P01, GRMZM2G134256_P01, GRMZM2G117707_P02
GO:0031023	microtubule organizing center organization	BIOLOGICAL_PROCESS	0.0377071	4	2	1656	4969	GRMZM2G094388_P01, GRMZM2G078933_P01, GRMZM2G096092_P01, GRMZM2G071518_P01
GO:0036440	citrate synthase activity	MOLECULAR_FUNCTION	0.00391686	4	0	1656	4971	GRMZM2G064023_P02, GRMZM2G063851_P01, GRMZM2G063909_P03, GRMZM2G063909_P01
GO:0004832	valine-tRNA ligase activity	MOLECULAR_FUNCTION	0.00391686	4	0	1656	4971	GRMZM2G117870_P01, GRMZM2G134756_P01, GRMZM2G106974_P01, GRMZM5G871297_P01
GO:0004108	citrate (Si)-synthase activity	MOLECULAR_FUNCTION	0.00391686	4	0	1656	4971	GRMZM2G064023_P02, GRMZM2G063851_P01, GRMZM2G063909_P03, GRMZM2G063909_P01
GO:0030515	snoRNA binding	MOLECULAR_FUNCTION	0.0156692	4	1	1656	4970	GRMZM2G125148_P03, GRMZM2G150648_P03, GRMZM2G110233_P01, GRMZM2G124576_P02
GO:0042803	protein homodimerization activity	MOLECULAR_FUNCTION	0.0384761	4	34	1656	4937	GRMZM2G119219_P03, GRMZM2G030312_P01, GRMZM2G044684_P01, GRMZM2G418294_P01
GO:0010506	regulation of autophagy	BIOLOGICAL_PROCESS	0.0156675	3	0	1657	4971	GRMZM2G382106_P01, GRMZM2G133756_P01, GRMZM2G049342_P01
GO:0045903	positive regulation of translational fidelity	BIOLOGICAL_PROCESS	0.0156675	3	0	1657	4971	GRMZM2G064640_P01, GRMZM2G108348_P03, GRMZM5G832108_P01
GO:0010387	COP9 signalosome assembly	BIOLOGICAL_PROCESS	0.0156675	3	0	1657	4971	GRMZM2G107588_P01, GRMZM2G171745_P02, GRMZM2G062210_P01
GO:0010025	wax biosynthetic process	BIOLOGICAL_PROCESS	0.0156675	3	0	1657	4971	GRMZM2G114642_P01, GRMZM2G481843_P01, GRMZM2G101875_P01
GO:0010166	wax metabolic process	BIOLOGICAL_PROCESS	0.0156675	3	0	1657	4971	GRMZM2G114642_P01, GRMZM2G481843_P01, GRMZM2G101875_P01
GO:0008509	anion transmembrane transporter activity	MOLECULAR_FUNCTION	0.00184763	3	43	1657	4928	GRMZM2G157564_P02, GRMZM2G177812_P01, GRMZM2G064563_P02
GO:0015926	glucosidase activity	MOLECULAR_FUNCTION	0.013193	3	34	1657	4937	GRMZM2G034575_P01, GRMZM2G040843_P01, GRMZM2G170842_P01
GO:0048040	UDP-glucuronate decarboxylase activity	MOLECULAR_FUNCTION	0.0156675	3	0	1657	4971	GRMZM2G165357_P01, GRMZM2G044027_P02, GRMZM2G007195_P02
GO:0016207	4-coumarate-CoA ligase activity	MOLECULAR_FUNCTION	0.0156675	3	0	1657	4971	GRMZM2G055320_P01, GRMZM2G075333_P01, GRMZM2G054013_P02
GO:0042180	cellular ketone metabolic process	BIOLOGICAL_PROCESS	0.00160532	2	39	1658	4932	GRMZM2G099729_P01, GRMZM2G064695_P04
GO:0008219	cell death	BIOLOGICAL_PROCESS	0.00235043	2	36	1658	4935	GRMZM2G025171_P01, GRMZM2G141707_P01
GO:0015711	organic anion transport	BIOLOGICAL_PROCESS	0.00358763	2	35	1658	4936	GRMZM2G177812_P01, GRMZM2G150201_P03
GO:0012501	programmed cell death	BIOLOGICAL_PROCESS	0.0123194	2	29	1658	4942	GRMZM2G025171_P01, GRMZM2G141707_P01
GO:0046942	carboxylic acid transport	BIOLOGICAL_PROCESS	0.0287667	2	27	1658	4944	GRMZM2G177812_P01, GRMZM2G150201_P03
GO:0015849	organic acid transport	BIOLOGICAL_PROCESS	0.0287667	2	27	1658	4944	GRMZM2G177812_P01, GRMZM2G150201_P03
GO:0006875	cellular metal ion homeostasis	BIOLOGICAL_PROCESS	0.0408679	2	24	1658	4947	GRMZM2G000166_P01, GRMZM2G074687_P01
GO:0015291	secondary active transmembrane transporter activity	MOLECULAR_FUNCTION	5.58839e-06	2	61	1658	4910	GRMZM2G022248_P01, GRMZM2G168588_P01
GO:0051539	4 iron, 4 sulfur cluster binding	MOLECULAR_FUNCTION	0.00239371	2	37	1658	4934	GRMZM2G139803_P01, GRMZM2G452523_P01
GO:0016811	hydrolase activity, acting on carbon-nitrogen (but not peptide) bonds, in linear amides	MOLECULAR_FUNCTION	0.0275095	2	26	1658	4945	GRMZM2G334457_P01, GRMZM2G173416_P02
GO:0004180	carboxypeptidase activity	MOLECULAR_FUNCTION	0.0287667	2	27	1658	4944	GRMZM2G064212_P02, GRMZM2G106165_P02
GO:0098656	anion transmembrane transport	BIOLOGICAL_PROCESS	1.17038e-05	1	50	1659	4921	GRMZM2G025387_P01
GO:0008643	carbohydrate transport	BIOLOGICAL_PROCESS	7.80157e-05	1	44	1659	4927	AC209208.3_FGP002
GO:0009991	response to extracellular stimulus	BIOLOGICAL_PROCESS	0.0160456	1	23	1659	4948	GRMZM2G143213_P02
GO:0031667	response to nutrient levels	BIOLOGICAL_PROCESS	0.0245931	1	21	1659	4950	GRMZM2G143213_P02
GO:0046916	cellular transition metal ion homeostasis	BIOLOGICAL_PROCESS	0.0245931	1	21	1659	4950	GRMZM2G000166_P01
GO:0006487	protein N-linked glycosylation	BIOLOGICAL_PROCESS	0.039395	1	20	1659	4951	GRMZM2G137707_P01
GO:0015144	carbohydrate transmembrane transporter activity	MOLECULAR_FUNCTION	0.00044827	1	36	1659	4935	AC209208.3_FGP002
GO:0046873	metal ion transmembrane transporter activity	MOLECULAR_FUNCTION	0.00271855	1	29	1659	4942	GRMZM2G356938_P01
GO:0070008	serine-type exopeptidase activity	MOLECULAR_FUNCTION	0.00696054	1	27	1659	4944	GRMZM2G106165_P02
GO:0008514	organic anion transmembrane transporter activity	MOLECULAR_FUNCTION	0.010237	1	24	1659	4947	GRMZM2G177812_P01
GO:0004185	serine-type carboxypeptidase activity	MOLECULAR_FUNCTION	0.0105303	1	25	1659	4946	GRMZM2G106165_P02
GO:0005342	organic acid transmembrane transporter activity	MOLECULAR_FUNCTION	0.0245931	1	21	1659	4950	GRMZM2G177812_P01
GO:0004871	obsolete signal transducer activity	MOLECULAR_FUNCTION	0.0245931	1	21	1659	4950	0
GO:0046943	carboxylic acid transmembrane transporter activity	MOLECULAR_FUNCTION	0.0245931	1	21	1659	4950	GRMZM2G177812_P01
GO:0015238	drug transmembrane transporter activity	MOLECULAR_FUNCTION	0.0378527	1	19	1659	4952	GRMZM2G168588_P01
GO:0031072	heat shock protein binding	MOLECULAR_FUNCTION	0.039395	1	20	1659	4951	GRMZM2G098460_P01
GO:0019685	photosynthesis, dark reaction	BIOLOGICAL_PROCESS	0.0305344	0	15	1660	4956
GO:0034219	carbohydrate transmembrane transport	BIOLOGICAL_PROCESS	0.000133582	0	32	1660	4939
GO:1903825	organic acid transmembrane transport	BIOLOGICAL_PROCESS	0.00401098	0	21	1660	4950
GO:1905039	carboxylic acid transmembrane transport	BIOLOGICAL_PROCESS	0.00401098	0	21	1660	4950
GO:0015749	monosaccharide transmembrane transport	BIOLOGICAL_PROCESS	0.00401098	0	21	1660	4950
GO:1904659	glucose transmembrane transport	BIOLOGICAL_PROCESS	0.00643847	0	19	1660	4952
GO:0046323	glucose import	BIOLOGICAL_PROCESS	0.00643847	0	19	1660	4952
GO:0008645	hexose transmembrane transport	BIOLOGICAL_PROCESS	0.00643847	0	19	1660	4952
GO:0009312	oligosaccharide biosynthetic process	BIOLOGICAL_PROCESS	0.0173639	0	16	1660	4955
GO:0046351	disaccharide biosynthetic process	BIOLOGICAL_PROCESS	0.0173639	0	16	1660	4955
GO:0006338	chromatin remodeling	BIOLOGICAL_PROCESS	0.0279486	0	14	1660	4957
GO:0019253	reductive pentose-phosphate cycle	BIOLOGICAL_PROCESS	0.0305344	0	15	1660	4956
GO:1901616	organic hydroxy compound catabolic process	BIOLOGICAL_PROCESS	0.0478744	0	13	1660	4958
GO:0006289	nucleotide-excision repair	BIOLOGICAL_PROCESS	0.0456832	0	12	1660	4959
GO:0035690	cellular response to drug	BIOLOGICAL_PROCESS	0.0456832	0	12	1660	4959
GO:0070588	calcium ion transmembrane transport	BIOLOGICAL_PROCESS	0.0456832	0	12	1660	4959
GO:0010114	response to red light	BIOLOGICAL_PROCESS	0.0456832	0	12	1660	4959
GO:0015293	symporter activity	MOLECULAR_FUNCTION	0.0016413	0	25	1660	4946
GO:0015662	ATPase activity, coupled to transmembrane movement of ions, phosphorylative mechanism	MOLECULAR_FUNCTION	0.00244123	0	22	1660	4949
GO:0008422	beta-glucosidase activity	MOLECULAR_FUNCTION	0.00254276	0	23	1660	4948
GO:0051119	sugar transmembrane transporter activity	MOLECULAR_FUNCTION	0.00254276	0	23	1660	4948
GO:0015294	solute:cation symporter activity	MOLECULAR_FUNCTION	0.00254276	0	23	1660	4948
GO:0005351	carbohydrate:proton symporter activity	MOLECULAR_FUNCTION	0.00401098	0	21	1660	4950
GO:0005402	carbohydrate:cation symporter activity	MOLECULAR_FUNCTION	0.00401098	0	21	1660	4950
GO:0015145	monosaccharide transmembrane transporter activity	MOLECULAR_FUNCTION	0.00401098	0	21	1660	4950
GO:0015295	solute:proton symporter activity	MOLECULAR_FUNCTION	0.00401098	0	21	1660	4950
GO:0005355	glucose transmembrane transporter activity	MOLECULAR_FUNCTION	0.00643847	0	19	1660	4952
GO:0015149	hexose transmembrane transporter activity	MOLECULAR_FUNCTION	0.00643847	0	19	1660	4952
GO:0003682	chromatin binding	MOLECULAR_FUNCTION	0.00704725	0	20	1660	4951
GO:0038023	signaling receptor activity	MOLECULAR_FUNCTION	0.0105053	0	17	1660	4954
GO:0004620	phospholipase activity	MOLECULAR_FUNCTION	0.0105053	0	17	1660	4954
GO:0060089	molecular transducer activity	MOLECULAR_FUNCTION	0.0109675	0	18	1660	4953
GO:0015925	galactosidase activity	MOLECULAR_FUNCTION	0.0279486	0	14	1660	4957
GO:0102483	scopolin beta-glucosidase activity	MOLECULAR_FUNCTION	0.0456832	0	12	1660	4959
GO:0008308	voltage-gated anion channel activity	MOLECULAR_FUNCTION	0.0456832	0	12	1660	4959
GO:0005253	anion channel activity	MOLECULAR_FUNCTION	0.0456832	0	12	1660	4959
GO:0008235	metalloexopeptidase activity	MOLECULAR_FUNCTION	0.0456832	0	12	1660	4959
GO:0046556	alpha-L-arabinofuranosidase activity	MOLECULAR_FUNCTION	0.0478744	0	13	1660	4958
GO:0015085	calcium ion transmembrane transporter activity	MOLECULAR_FUNCTION	0.0456832	0	12	1660	4959

## Sheet: MEmagenta
GO enrichment analysis of “MEmagenta" module.
GO.ID	GO.Name	GO.Category	P.Value	Nr.Test	Nr.Reference	Non.Annot.Test	Non.Annot.Reference	SeqTest
GO:0009987	cellular process	BIOLOGICAL_PROCESS	0.0165996	161	3663	154	2653
GO:1901564	organonitrogen compound metabolic process	BIOLOGICAL_PROCESS	0.00114731	72	1988	243	4328	GRMZM2G018403_P01, GRMZM2G036861_P01, GRMZM2G044697_P05, GRMZM2G006107_P01, GRMZM2G033799_P01, GRMZM2G102156_P01, GRMZM2G170400_P01, AC197122.3_FGP003, GRMZM2G156565_P01, GRMZM2G019437_P01, GRMZM2G179521_P01, GRMZM2G049416_P01, GRMZM2G149286_P01, GRMZM2G386229_P01, GRMZM2G014917_P01, GRMZM2G072861_P01, GRMZM2G142383_P02, GRMZM2G103897_P01, GRMZM2G704093_P02, GRMZM2G003109_P01, AC218972.3_FGP001, …
GO:1901576	organic substance biosynthetic process	BIOLOGICAL_PROCESS	0.0385394	63	1593	252	4723	GRMZM2G018403_P01, GRMZM2G036861_P01, GRMZM2G044697_P05, GRMZM5G886363_P02, GRMZM2G083130_P01, GRMZM2G033799_P01, GRMZM2G102156_P01, GRMZM2G170400_P01, AC197122.3_FGP003, GRMZM2G156565_P01, GRMZM2G019437_P01, GRMZM2G049416_P01, GRMZM2G004087_P01, GRMZM2G155662_P01, GRMZM2G125294_P01, GRMZM2G142383_P02, GRMZM5G812289_P01, GRMZM2G003109_P01, GRMZM2G430680_P02, GRMZM2G010406_P01, GRMZM2G085078_P01, …
GO:0050896	response to stimulus	BIOLOGICAL_PROCESS	0.00605643	31	974	284	5342	GRMZM2G127168_P02, GRMZM2G140893_P01, GRMZM2G018403_P01, GRMZM2G036861_P01, GRMZM2G079127_P01, GRMZM2G155662_P01, GRMZM2G105400_P01, GRMZM2G063972_P01, GRMZM2G074158_P01, GRMZM2G103897_P01, GRMZM2G704093_P02, GRMZM2G117189_P02, GRMZM2G177532_P02, GRMZM2G068217_P01, GRMZM2G149847_P02, GRMZM2G085078_P01, GRMZM2G083725_P02, GRMZM2G456086_P01, GRMZM2G422938_P01, GRMZM2G320708_P01, GRMZM2G175177_P01, …
GO:1901566	organonitrogen compound biosynthetic process	BIOLOGICAL_PROCESS	0.00695769	30	943	285	5373	GRMZM2G018403_P01, GRMZM2G036861_P01, GRMZM5G884270_P02, GRMZM2G033799_P01, GRMZM2G102156_P01, GRMZM2G170400_P01, AC197122.3_FGP003, GRMZM2G156565_P01, GRMZM2G019437_P01, GRMZM2G049416_P01, GRMZM2G142383_P02, GRMZM2G478568_P01, GRMZM2G003109_P01, GRMZM2G010406_P01, GRMZM2G085078_P01, GRMZM2G566786_P03, GRMZM2G124911_P01, GRMZM2G409407_P01, GRMZM2G163988_P01, GRMZM5G859388_P01, GRMZM2G074956_P01, …
GO:0071840	cellular component organization or biogenesis	BIOLOGICAL_PROCESS	0.0149491	29	887	286	5429
GO:0016043	cellular component organization	BIOLOGICAL_PROCESS	0.0223208	26	791	289	5525	GRMZM2G140893_P01, GRMZM2G018403_P01, GRMZM2G044697_P05, GRMZM2G104199_P02, GRMZM5G886363_P02, GRMZM2G156565_P01, GRMZM2G081322_P01, GRMZM2G055520_P01, GRMZM2G128663_P01, GRMZM2G044862_P01, AC205703.4_FGP002, GRMZM2G704093_P02, GRMZM2G140577_P01, GRMZM2G566786_P03, GRMZM5G812923_P03, GRMZM2G176707_P01, GRMZM2G010085_P01, GRMZM2G140051_P01, GRMZM2G326677_P01, GRMZM2G479744_P01, GRMZM2G074956_P01, …
GO:0051716	cellular response to stimulus	BIOLOGICAL_PROCESS	0.0229261	14	501	301	5815	GRMZM2G422938_P01, GRMZM2G175177_P01, GRMZM2G155662_P01, GRMZM2G408963_P01, GRMZM2G165694_P01, GRMZM2G055643_P03, GRMZM2G103897_P01, GRMZM2G704093_P02, GRMZM2G117189_P02, GRMZM2G068217_P01, GRMZM2G149847_P02, GRMZM2G116846_P01, GRMZM2G134731_P01, GRMZM2G177937_P01
GO:0006820	anion transport	BIOLOGICAL_PROCESS	0.00219226	10	63	305	6253	GRMZM2G113409_P01, GRMZM2G066413_P02, GRMZM2G053927_P02, GRMZM2G326677_P01, GRMZM2G344163_P01, GRMZM2G103047_P01, GRMZM2G395114_P01, GRMZM2G124911_P01, GRMZM2G028521_P02, GRMZM2G074053_P01
GO:0098656	anion transmembrane transport	BIOLOGICAL_PROCESS	0.000571298	9	42	306	6274	GRMZM2G113409_P01, GRMZM2G066413_P02, GRMZM2G053927_P02, GRMZM2G344163_P01, GRMZM2G103047_P01, GRMZM2G395114_P01, GRMZM2G124911_P01, GRMZM2G028521_P02, GRMZM2G074053_P01
GO:0051172	negative regulation of nitrogen compound metabolic process	BIOLOGICAL_PROCESS	0.0217163	8	65	307	6251	GRMZM2G012160_P01, GRMZM2G011523_P01, GRMZM2G449355_P02, AC197122.3_FGP003, GRMZM2G173809_P01, GRMZM2G007928_P01, GRMZM2G155662_P01, GRMZM2G044862_P01
GO:0017144	drug metabolic process	BIOLOGICAL_PROCESS	0.00293834	7	384	308	5932	GRMZM2G142863_P01, GRMZM2G140893_P01, GRMZM2G478568_P01, GRMZM2G102156_P01, GRMZM2G085078_P01, GRMZM2G116846_P01, GRMZM2G408963_P01
GO:0006753	nucleoside phosphate metabolic process	BIOLOGICAL_PROCESS	0.0495316	7	291	308	6025	GRMZM2G142383_P02, GRMZM2G010406_P01, GRMZM2G179521_P01, GRMZM2G180863_P01, GRMZM5G833747_P02, GRMZM2G074956_P01, GRMZM2G456086_P01
GO:0009117	nucleotide metabolic process	BIOLOGICAL_PROCESS	0.0495316	7	291	308	6025
GO:0004842	ubiquitin-protein transferase activity	MOLECULAR_FUNCTION	0.0473611	7	63	308	6253	GRMZM2G139941_P01, GRMZM2G075104_P01, GRMZM2G704093_P02, GRMZM2G146267_P02, GRMZM2G085600_P02, GRMZM2G166089_P05, GRMZM2G055643_P03
GO:0019787	ubiquitin-like protein transferase activity	MOLECULAR_FUNCTION	0.0473611	7	63	308	6253	GRMZM2G139941_P01, GRMZM2G075104_P01, GRMZM2G704093_P02, GRMZM2G146267_P02, GRMZM2G085600_P02, GRMZM2G166089_P05, GRMZM2G055643_P03
GO:1901137	carbohydrate derivative biosynthetic process	BIOLOGICAL_PROCESS	0.042116	6	273	309	6043	GRMZM2G142383_P02, GRMZM5G833747_P02, GRMZM2G074956_P01, GRMZM5G884270_P02, GRMZM2G165694_P01, GRMZM2G000632_P03
GO:0009628	response to abiotic stimulus	BIOLOGICAL_PROCESS	0.0133575	6	307	309	6009	GRMZM2G127168_P02, GRMZM2G063972_P01, GRMZM2G074158_P01, GRMZM2G320708_P01, GRMZM2G704093_P02, GRMZM2G105400_P01
GO:0043933	protein-containing complex subunit organization	BIOLOGICAL_PROCESS	0.0416159	6	271	309	6045
GO:0004519	endonuclease activity	MOLECULAR_FUNCTION	0.00348159	6	26	309	6290	GRMZM2G162764_P01, GRMZM2G168744_P01, GRMZM2G102714_P01, GRMZM2G158394_P01, GRMZM2G064914_P03, GRMZM2G051374_P07
GO:0008509	anion transmembrane transporter activity	MOLECULAR_FUNCTION	0.0206619	6	40	309	6276	GRMZM2G113409_P01, GRMZM2G344163_P01, GRMZM2G103047_P01, GRMZM2G395114_P01, GRMZM2G066413_P02, GRMZM2G074053_P01
GO:0004518	nuclease activity	MOLECULAR_FUNCTION	0.0384939	6	47	309	6269	GRMZM2G162764_P01, GRMZM2G168744_P01, GRMZM2G102714_P01, GRMZM2G158394_P01, GRMZM2G064914_P03, GRMZM2G051374_P07
GO:0061659	ubiquitin-like protein ligase activity	MOLECULAR_FUNCTION	0.013548	6	36	309	6280
GO:0061630	ubiquitin protein ligase activity	MOLECULAR_FUNCTION	0.013548	6	36	309	6280
GO:0051248	negative regulation of protein metabolic process	BIOLOGICAL_PROCESS	0.010864	5	24	310	6292	AC197122.3_FGP003, GRMZM2G012160_P01, GRMZM2G173809_P01, GRMZM2G007928_P01, GRMZM2G011523_P01
GO:0032269	negative regulation of cellular protein metabolic process	BIOLOGICAL_PROCESS	0.010864	5	24	310	6292	AC197122.3_FGP003, GRMZM2G012160_P01, GRMZM2G173809_P01, GRMZM2G007928_P01, GRMZM2G011523_P01
GO:0048438	floral whorl development	BIOLOGICAL_PROCESS	0.0324915	5	33	310	6283	GRMZM2G156565_P01, GRMZM2G044697_P05, GRMZM2G566786_P03, GRMZM2G010754_P01, GRMZM2G117300_P01
GO:0042180	cellular ketone metabolic process	BIOLOGICAL_PROCESS	0.04327	5	36	310	6280	GRMZM2G059981_P01, GRMZM2G134270_P01, GRMZM5G812923_P03, GRMZM2G173354_P02, GRMZM2G117189_P02
GO:0015711	organic anion transport	BIOLOGICAL_PROCESS	0.0293154	5	32	310	6284
GO:0006091	generation of precursor metabolites and energy	BIOLOGICAL_PROCESS	0.00108688	5	341	310	5975	GRMZM2G142863_P01, GRMZM2G018403_P01, GRMZM2G170870_P01, GRMZM2G074158_P01, GRMZM2G058760_P01
GO:0007154	cell communication	BIOLOGICAL_PROCESS	0.013832	5	276	310	6040	GRMZM2G149847_P02, GRMZM2G704093_P02, GRMZM2G068217_P01, GRMZM2G134731_P01, GRMZM2G055643_P03
GO:0007165	signal transduction	BIOLOGICAL_PROCESS	0.033416	5	248	310	6068	GRMZM2G149847_P02, GRMZM2G704093_P02, GRMZM2G068217_P01, GRMZM2G134731_P01, GRMZM2G055643_P03
GO:0019693	ribose phosphate metabolic process	BIOLOGICAL_PROCESS	0.0331566	5	244	310	6072	GRMZM2G142383_P02, GRMZM2G179521_P01, GRMZM5G833747_P02, GRMZM2G074956_P01, GRMZM2G456086_P01
GO:0023052	signaling	BIOLOGICAL_PROCESS	0.0247722	5	254	310	6062	GRMZM2G149847_P02, GRMZM2G704093_P02, GRMZM2G068217_P01, GRMZM2G134731_P01, GRMZM2G055643_P03
GO:0003993	acid phosphatase activity	MOLECULAR_FUNCTION	0.00156995	5	14	310	6302	GRMZM2G093101_P01, GRMZM2G141277_P01, GRMZM2G371793_P01, GRMZM2G136453_P01, GRMZM2G001508_P01
GO:0010383	cell wall polysaccharide metabolic process	BIOLOGICAL_PROCESS	0.0464973	4	25	311	6291	GRMZM2G044107_P01, GRMZM2G140893_P01, GRMZM2G064605_P01, GRMZM2G075104_P01
GO:0009438	methylglyoxal metabolic process	BIOLOGICAL_PROCESS	0.00577289	4	12	311	6304	GRMZM2G059981_P01, GRMZM5G812923_P03, GRMZM2G173354_P02, GRMZM2G117189_P02
GO:0043484	regulation of RNA splicing	BIOLOGICAL_PROCESS	0.00126398	4	7	311	6309	GRMZM2G334216_P04, GRMZM2G054621_P01, GRMZM2G449355_P02, GRMZM2G178169_P01
GO:0042182	ketone catabolic process	BIOLOGICAL_PROCESS	0.00577289	4	12	311	6304	GRMZM2G059981_P01, GRMZM5G812923_P03, GRMZM2G173354_P02, GRMZM2G117189_P02
GO:0019243	methylglyoxal catabolic process to D-lactate via S-lactoyl-glutathione	BIOLOGICAL_PROCESS	0.00449552	4	11	311	6305	GRMZM2G059981_P01, GRMZM5G812923_P03, GRMZM2G173354_P02, GRMZM2G117189_P02
GO:0015748	organophosphate ester transport	BIOLOGICAL_PROCESS	0.00449552	4	11	311	6305	GRMZM2G326677_P01, GRMZM2G103047_P01, GRMZM2G066413_P02, GRMZM2G124911_P01
GO:0046185	aldehyde catabolic process	BIOLOGICAL_PROCESS	0.00727112	4	13	311	6303	GRMZM2G059981_P01, GRMZM5G812923_P03, GRMZM2G173354_P02, GRMZM2G117189_P02
GO:0051596	methylglyoxal catabolic process	BIOLOGICAL_PROCESS	0.00577289	4	12	311	6304	GRMZM2G059981_P01, GRMZM5G812923_P03, GRMZM2G173354_P02, GRMZM2G117189_P02
GO:0006089	lactate metabolic process	BIOLOGICAL_PROCESS	0.00449552	4	11	311	6305	GRMZM2G059981_P01, GRMZM5G812923_P03, GRMZM2G173354_P02, GRMZM2G117189_P02
GO:0061727	methylglyoxal catabolic process to lactate	BIOLOGICAL_PROCESS	0.00449552	4	11	311	6305	GRMZM2G059981_P01, GRMZM5G812923_P03, GRMZM2G173354_P02, GRMZM2G117189_P02
GO:0016556	mRNA modification	BIOLOGICAL_PROCESS	0.0326812	4	22	311	6294	GRMZM2G373420_P01, GRMZM2G566786_P03, GRMZM2G117531_P04, GRMZM2G054621_P01
GO:0090502	RNA phosphodiester bond hydrolysis, endonucleolytic	BIOLOGICAL_PROCESS	0.0185431	4	18	311	6298	GRMZM2G168744_P01, GRMZM2G158394_P01, GRMZM2G064914_P03, GRMZM2G051374_P07
GO:0006869	lipid transport	BIOLOGICAL_PROCESS	0.0464973	4	25	311	6291
GO:0010876	lipid localization	BIOLOGICAL_PROCESS	0.0464973	4	25	311	6291
GO:0051188	cofactor biosynthetic process	BIOLOGICAL_PROCESS	0.0347765	4	215	311	6101	GRMZM2G134270_P01, GRMZM2G105436_P01, GRMZM2G102156_P01, GRMZM2G095806_P01
GO:1901605	alpha-amino acid metabolic process	BIOLOGICAL_PROCESS	0.0468613	4	205	311	6111	GRMZM2G010406_P01, GRMZM2G085078_P01, GRMZM2G085117_P01, GRMZM2G003109_P01
GO:0004521	endoribonuclease activity	MOLECULAR_FUNCTION	0.00900486	4	14	311	6302	GRMZM2G168744_P01, GRMZM2G158394_P01, GRMZM2G064914_P03, GRMZM2G051374_P07
GO:0003682	chromatin binding	MOLECULAR_FUNCTION	0.0132311	4	16	311	6300	GRMZM2G010085_P01, GRMZM2G126170_P02, GRMZM5G812289_P01, GRMZM2G044862_P01
GO:0004540	ribonuclease activity	MOLECULAR_FUNCTION	0.0326812	4	22	311	6294	GRMZM2G168744_P01, GRMZM2G158394_P01, GRMZM2G064914_P03, GRMZM2G051374_P07
GO:0015297	antiporter activity	MOLECULAR_FUNCTION	0.0286933	4	21	311	6295	GRMZM2G079127_P01, GRMZM2G065154_P01, GRMZM2G103047_P01, GRMZM2G066413_P02
GO:0009260	ribonucleotide biosynthetic process	BIOLOGICAL_PROCESS	0.0356306	3	186	312	6130	GRMZM5G833747_P02, GRMZM2G074956_P01, GRMZM2G142383_P02
GO:0070592	cell wall polysaccharide biosynthetic process	BIOLOGICAL_PROCESS	0.0131795	3	8	312	6308
GO:0044038	cell wall macromolecule biosynthetic process	BIOLOGICAL_PROCESS	0.0212917	3	10	312	6306	GRMZM2G140893_P01, GRMZM2G064605_P01, GRMZM2G075104_P01
GO:0050684	regulation of mRNA processing	BIOLOGICAL_PROCESS	0.00322177	3	4	312	6312	GRMZM2G054621_P01, GRMZM2G449355_P02, GRMZM2G178169_P01
GO:0048024	regulation of mRNA splicing, via spliceosome	BIOLOGICAL_PROCESS	0.00322177	3	4	312	6312	GRMZM2G054621_P01, GRMZM2G449355_P02, GRMZM2G178169_P01
GO:1903311	regulation of mRNA metabolic process	BIOLOGICAL_PROCESS	0.00720151	3	6	312	6310	GRMZM2G054621_P01, GRMZM2G449355_P02, GRMZM2G178169_P01
GO:0006074	(1->3)-beta-D-glucan metabolic process	BIOLOGICAL_PROCESS	0.00720151	3	6	312	6310	GRMZM2G032160_P01, GRMZM2G004087_P01, GRMZM2G430680_P02
GO:0052548	regulation of endopeptidase activity	BIOLOGICAL_PROCESS	0.0261649	3	11	312	6305	GRMZM2G007928_P01, GRMZM2G012160_P01, GRMZM2G011523_P01
GO:0052547	regulation of peptidase activity	BIOLOGICAL_PROCESS	0.0261649	3	11	312	6305	GRMZM2G007928_P01, GRMZM2G012160_P01, GRMZM2G011523_P01
GO:0015698	inorganic anion transport	BIOLOGICAL_PROCESS	0.0440241	3	14	312	6302	GRMZM2G113409_P01, GRMZM2G344163_P01, GRMZM2G395114_P01
GO:0051346	negative regulation of hydrolase activity	BIOLOGICAL_PROCESS	0.0375383	3	13	312	6303	GRMZM2G007928_P01, GRMZM2G012160_P01, GRMZM2G011523_P01
GO:0010466	negative regulation of peptidase activity	BIOLOGICAL_PROCESS	0.0261649	3	11	312	6305	GRMZM2G007928_P01, GRMZM2G012160_P01, GRMZM2G011523_P01
GO:0006338	chromatin remodeling	BIOLOGICAL_PROCESS	0.0261649	3	11	312	6305	GRMZM2G010085_P01, GRMZM2G128663_P01, GRMZM2G044862_P01
GO:0045861	negative regulation of proteolysis	BIOLOGICAL_PROCESS	0.0261649	3	11	312	6305	GRMZM2G007928_P01, GRMZM2G012160_P01, GRMZM2G011523_P01
GO:0010951	negative regulation of endopeptidase activity	BIOLOGICAL_PROCESS	0.0261649	3	11	312	6305
GO:0070589	cellular component macromolecule biosynthetic process	BIOLOGICAL_PROCESS	0.0212917	3	10	312	6306
GO:0045595	regulation of cell differentiation	BIOLOGICAL_PROCESS	0.0212917	3	10	312	6306
GO:0009259	ribonucleotide metabolic process	BIOLOGICAL_PROCESS	0.00692605	3	228	312	6088	GRMZM5G833747_P02, GRMZM2G074956_P01, GRMZM2G142383_P02
GO:0046390	ribose phosphate biosynthetic process	BIOLOGICAL_PROCESS	0.0356306	3	186	312	6130	GRMZM5G833747_P02, GRMZM2G074956_P01, GRMZM2G142383_P02
GO:0072330	monocarboxylic acid biosynthetic process	BIOLOGICAL_PROCESS	0.019036	3	206	312	6110
GO:0004866	endopeptidase inhibitor activity	MOLECULAR_FUNCTION	0.0261649	3	11	312	6305	GRMZM2G007928_P01, GRMZM2G012160_P01, GRMZM2G011523_P01
GO:0030414	peptidase inhibitor activity	MOLECULAR_FUNCTION	0.0261649	3	11	312	6305	GRMZM2G007928_P01, GRMZM2G012160_P01, GRMZM2G011523_P01
GO:0016679	oxidoreductase activity, acting on diphenols and related substances as donors	MOLECULAR_FUNCTION	0.0261649	3	11	312	6305	GRMZM5G851266_P01, AC214350.3_FGP007, GRMZM5G842071_P02
GO:0016799	hydrolase activity, hydrolyzing N-glycosyl compounds	MOLECULAR_FUNCTION	0.0375383	3	13	312	6303	GRMZM2G173809_P01, GRMZM2G386229_P01, GRMZM2G059392_P02
GO:0061134	peptidase regulator activity	MOLECULAR_FUNCTION	0.0261649	3	11	312	6305	GRMZM2G007928_P01, GRMZM2G012160_P01, GRMZM2G011523_P01
GO:0061135	endopeptidase regulator activity	MOLECULAR_FUNCTION	0.0261649	3	11	312	6305	GRMZM2G007928_P01, GRMZM2G012160_P01, GRMZM2G011523_P01
GO:0009199	ribonucleoside triphosphate metabolic process	BIOLOGICAL_PROCESS	0.0494247	2	149	313	6167	GRMZM5G833747_P02, GRMZM2G142383_P02
GO:0089722	phosphoenolpyruvate transmembrane transport	BIOLOGICAL_PROCESS	0.006537	2	1	313	6315	GRMZM2G066413_P02, GRMZM2G103047_P01
GO:0015717	triose phosphate transport	BIOLOGICAL_PROCESS	0.006537	2	1	313	6315	GRMZM2G066413_P02, GRMZM2G103047_P01
GO:0015714	phosphoenolpyruvate transport	BIOLOGICAL_PROCESS	0.006537	2	1	313	6315	GRMZM2G066413_P02, GRMZM2G103047_P01
GO:0035436	triose phosphate transmembrane transport	BIOLOGICAL_PROCESS	0.006537	2	1	313	6315	GRMZM2G066413_P02, GRMZM2G103047_P01
GO:0000381	regulation of alternative mRNA splicing, via spliceosome	BIOLOGICAL_PROCESS	0.0297176	2	4	313	6312	GRMZM2G054621_P01, GRMZM2G178169_P01
GO:0000380	alternative mRNA splicing, via spliceosome	BIOLOGICAL_PROCESS	0.0297176	2	4	313	6312	GRMZM2G054621_P01, GRMZM2G178169_P01
GO:0072348	sulfur compound transport	BIOLOGICAL_PROCESS	0.0126641	2	2	313	6314
GO:0009095	aromatic amino acid family biosynthetic process, prephenate pathway	BIOLOGICAL_PROCESS	0.0297176	2	4	313	6312
GO:0006821	chloride transport	BIOLOGICAL_PROCESS	0.0297176	2	4	313	6312
GO:0015718	monocarboxylic acid transport	BIOLOGICAL_PROCESS	0.0297176	2	4	313	6312
GO:0006075	(1->3)-beta-D-glucan biosynthetic process	BIOLOGICAL_PROCESS	0.0403159	2	5	313	6311
GO:0072521	purine-containing compound metabolic process	BIOLOGICAL_PROCESS	0.00304784	2	216	313	6100	GRMZM5G833747_P02, GRMZM2G386229_P01
GO:0009123	nucleoside monophosphate metabolic process	BIOLOGICAL_PROCESS	0.00871899	2	186	313	6130	GRMZM2G142383_P02, GRMZM2G180863_P01
GO:0048518	positive regulation of biological process	BIOLOGICAL_PROCESS	0.0347149	2	155	313	6161	GRMZM2G018403_P01, GRMZM5G886363_P02
GO:0009416	response to light stimulus	BIOLOGICAL_PROCESS	0.0344803	2	152	313	6164	GRMZM2G704093_P02, GRMZM2G105400_P01
GO:0009314	response to radiation	BIOLOGICAL_PROCESS	0.0345784	2	154	313	6162	GRMZM2G704093_P02, GRMZM2G105400_P01
GO:0009124	nucleoside monophosphate biosynthetic process	BIOLOGICAL_PROCESS	0.0358433	2	159	313	6157
GO:0006090	pyruvate metabolic process	BIOLOGICAL_PROCESS	0.0251372	2	166	313	6150
GO:0009156	ribonucleoside monophosphate biosynthetic process	BIOLOGICAL_PROCESS	0.0351628	2	157	313	6159
GO:0009161	ribonucleoside monophosphate metabolic process	BIOLOGICAL_PROCESS	0.0127428	2	184	313	6132
GO:0016892	endoribonuclease activity, producing 3-phosphomonoesters	MOLECULAR_FUNCTION	0.006537	2	1	313	6315
GO:0016894	endonuclease activity, active with either ribo- or deoxyribonucleic acids and producing 3-phosphomonoesters	MOLECULAR_FUNCTION	0.006537	2	1	313	6315	GRMZM2G064914_P03, GRMZM2G158394_P01
GO:0004645	phosphorylase activity	MOLECULAR_FUNCTION	0.006537	2	1	313	6315	GRMZM2G057186_P01, GRMZM2G074158_P01
GO:0015355	secondary active monocarboxylate transmembrane transporter activity	MOLECULAR_FUNCTION	0.006537	2	1	313	6315	GRMZM2G066413_P02, GRMZM2G103047_P01
GO:0089721	phosphoenolpyruvate transmembrane transporter activity	MOLECULAR_FUNCTION	0.006537	2	1	313	6315	GRMZM2G066413_P02, GRMZM2G103047_P01
GO:0015121	phosphoenolpyruvate:phosphate antiporter activity	MOLECULAR_FUNCTION	0.006537	2	1	313	6315	GRMZM2G066413_P02, GRMZM2G103047_P01
GO:0033897	ribonuclease T2 activity	MOLECULAR_FUNCTION	0.006537	2	1	313	6315	GRMZM2G064914_P03, GRMZM2G158394_P01
GO:0071917	triose-phosphate transmembrane transporter activity	MOLECULAR_FUNCTION	0.006537	2	1	313	6315	GRMZM2G066413_P02, GRMZM2G103047_P01
GO:0015301	anion:anion antiporter activity	MOLECULAR_FUNCTION	0.0403159	2	5	313	6311	GRMZM2G066413_P02, GRMZM2G103047_P01
GO:0016778	diphosphotransferase activity	MOLECULAR_FUNCTION	0.0297176	2	4	313	6312	GRMZM2G180863_P01, GRMZM2G095806_P01
GO:0005247	voltage-gated chloride channel activity	MOLECULAR_FUNCTION	0.0126641	2	2	313	6314	GRMZM2G113409_P01, GRMZM2G344163_P01
GO:0005254	chloride channel activity	MOLECULAR_FUNCTION	0.0126641	2	2	313	6314	GRMZM2G113409_P01, GRMZM2G344163_P01
GO:0015108	chloride transmembrane transporter activity	MOLECULAR_FUNCTION	0.0204477	2	3	313	6313	GRMZM2G113409_P01, GRMZM2G344163_P01
GO:0004556	alpha-amylase activity	MOLECULAR_FUNCTION	0.0126641	2	2	313	6314	GRMZM2G422938_P01, GRMZM2G058310_P01
GO:0008028	monocarboxylic acid transmembrane transporter activity	MOLECULAR_FUNCTION	0.0297176	2	4	313	6312	GRMZM2G066413_P02, GRMZM2G103047_P01
GO:0018024	histone-lysine N-methyltransferase activity	MOLECULAR_FUNCTION	0.0204477	2	3	313	6313
GO:0003843	1,3-beta-D-glucan synthase activity	MOLECULAR_FUNCTION	0.0403159	2	5	313	6311
GO:0009144	purine nucleoside triphosphate metabolic process	BIOLOGICAL_PROCESS	0.0101635	1	146	314	6170	GRMZM5G833747_P02
GO:0009206	purine ribonucleoside triphosphate biosynthetic process	BIOLOGICAL_PROCESS	0.0457891	1	118	314	6198	GRMZM5G833747_P02
GO:0009145	purine nucleoside triphosphate biosynthetic process	BIOLOGICAL_PROCESS	0.0457891	1	118	314	6198
GO:0052546	cell wall pectin metabolic process	BIOLOGICAL_PROCESS	0.0475041	1	0	314	6316	GRMZM2G140893_P01
GO:0052325	cell wall pectin biosynthetic process	BIOLOGICAL_PROCESS	0.0475041	1	0	314	6316	GRMZM2G140893_P01
GO:1905613	regulation of developmental vegetative growth	BIOLOGICAL_PROCESS	0.0475041	1	0	314	6316	GRMZM2G059392_P02
GO:1903866	palisade mesophyll development	BIOLOGICAL_PROCESS	0.0475041	1	0	314	6316	GRMZM2G074956_P01
GO:0019988	charged-tRNA amino acid modification	BIOLOGICAL_PROCESS	0.0475041	1	0	314	6316	GRMZM2G019437_P01
GO:0042447	hormone catabolic process	BIOLOGICAL_PROCESS	0.0475041	1	0	314	6316	GRMZM2G121700_P01
GO:0009852	auxin catabolic process	BIOLOGICAL_PROCESS	0.0475041	1	0	314	6316	GRMZM2G121700_P01
GO:0071763	nuclear membrane organization	BIOLOGICAL_PROCESS	0.0475041	1	0	314	6316	GRMZM2G104199_P02
GO:0030974	thiamine pyrophosphate transmembrane transport	BIOLOGICAL_PROCESS	0.0475041	1	0	314	6316	GRMZM2G124911_P01
GO:0010448	vegetative meristem growth	BIOLOGICAL_PROCESS	0.0475041	1	0	314	6316	GRMZM2G059392_P02
GO:0033119	negative regulation of RNA splicing	BIOLOGICAL_PROCESS	0.0475041	1	0	314	6316	GRMZM2G449355_P02
GO:0045117	azole transport	BIOLOGICAL_PROCESS	0.0475041	1	0	314	6316	GRMZM2G124911_P01
GO:0050686	negative regulation of mRNA processing	BIOLOGICAL_PROCESS	0.0475041	1	0	314	6316	GRMZM2G449355_P02
GO:0048025	negative regulation of mRNA splicing, via spliceosome	BIOLOGICAL_PROCESS	0.0475041	1	0	314	6316	GRMZM2G449355_P02
GO:0000053	argininosuccinate metabolic process	BIOLOGICAL_PROCESS	0.0475041	1	0	314	6316	GRMZM2G010406_P01
GO:0080186	developmental vegetative growth	BIOLOGICAL_PROCESS	0.0475041	1	0	314	6316	GRMZM2G059392_P02
GO:0048832	specification of plant organ number	BIOLOGICAL_PROCESS	0.0475041	1	0	314	6316	GRMZM2G059392_P02
GO:0034247	snoRNA splicing	BIOLOGICAL_PROCESS	0.0475041	1	0	314	6316	GRMZM2G164359_P01
GO:0010289	homogalacturonan biosynthetic process	BIOLOGICAL_PROCESS	0.0475041	1	0	314	6316	GRMZM2G140893_P01
GO:0010394	homogalacturonan metabolic process	BIOLOGICAL_PROCESS	0.0475041	1	0	314	6316	GRMZM2G140893_P01
GO:0010083	regulation of vegetative meristem growth	BIOLOGICAL_PROCESS	0.0475041	1	0	314	6316
GO:0010077	maintenance of inflorescence meristem identity	BIOLOGICAL_PROCESS	0.0475041	1	0	314	6316
GO:0010076	maintenance of floral meristem identity	BIOLOGICAL_PROCESS	0.0475041	1	0	314	6316
GO:0009051	pentose-phosphate shunt, oxidative branch	BIOLOGICAL_PROCESS	0.0475041	1	0	314	6316
GO:0046176	aldonic acid catabolic process	BIOLOGICAL_PROCESS	0.0475041	1	0	314	6316
GO:0046177	D-gluconate catabolic process	BIOLOGICAL_PROCESS	0.0475041	1	0	314	6316
GO:0071951	conversion of methionyl-tRNA to N-formyl-methionyl-tRNA	BIOLOGICAL_PROCESS	0.0475041	1	0	314	6316
GO:0015846	polyamine transport	BIOLOGICAL_PROCESS	0.0475041	1	0	314	6316	GRMZM2G129071_P01
GO:0022613	ribonucleoprotein complex biogenesis	BIOLOGICAL_PROCESS	0.00348784	1	178	314	6138	GRMZM2G165694_P01
GO:0006163	purine nucleotide metabolic process	BIOLOGICAL_PROCESS	0.00105674	1	197	314	6119	GRMZM5G833747_P02
GO:0072522	purine-containing compound biosynthetic process	BIOLOGICAL_PROCESS	0.007014	1	156	314	6160	GRMZM5G833747_P02
GO:0009150	purine ribonucleotide metabolic process	BIOLOGICAL_PROCESS	0.00159401	1	193	314	6123	GRMZM5G833747_P02
GO:0006164	purine nucleotide biosynthetic process	BIOLOGICAL_PROCESS	0.0107382	1	153	314	6163	GRMZM5G833747_P02
GO:0009205	purine ribonucleoside triphosphate metabolic process	BIOLOGICAL_PROCESS	0.0101635	1	146	314	6170	GRMZM5G833747_P02
GO:0009152	purine ribonucleotide biosynthetic process	BIOLOGICAL_PROCESS	0.0104458	1	151	314	6165	GRMZM5G833747_P02
GO:0006631	fatty acid metabolic process	BIOLOGICAL_PROCESS	0.0443779	1	114	314	6202	GRMZM2G339336_P01
GO:0042254	ribosome biogenesis	BIOLOGICAL_PROCESS	0.0212959	1	129	314	6187	GRMZM2G165694_P01
GO:0042301	phosphate ion binding	MOLECULAR_FUNCTION	0.0475041	1	0	314	6316	GRMZM5G831399_P01
GO:0004015	adenosylmethionine-8-amino-7-oxononanoate transaminase activity	MOLECULAR_FUNCTION	0.0475041	1	0	314	6316	GRMZM2G102156_P01
GO:0008418	protein-N-terminal asparagine amidohydrolase activity	MOLECULAR_FUNCTION	0.0475041	1	0	314	6316	GRMZM2G144362_P06
GO:0016040	glutamate synthase (NADH) activity	MOLECULAR_FUNCTION	0.0475041	1	0	314	6316	GRMZM2G085078_P01
GO:0004055	argininosuccinate synthase activity	MOLECULAR_FUNCTION	0.0475041	1	0	314	6316	GRMZM2G010406_P01
GO:0036455	iron-sulfur transferase activity	MOLECULAR_FUNCTION	0.0475041	1	0	314	6316	GRMZM5G868273_P02
GO:0016824	hydrolase activity, acting on acid halide bonds	MOLECULAR_FUNCTION	0.0475041	1	0	314	6316	GRMZM2G117531_P04
GO:0004141	dethiobiotin synthase activity	MOLECULAR_FUNCTION	0.0475041	1	0	314	6316	GRMZM2G102156_P01
GO:0004156	dihydropteroate synthase activity	MOLECULAR_FUNCTION	0.0475041	1	0	314	6316	GRMZM2G095806_P01
GO:0051377	mannose-ethanolamine phosphotransferase activity	MOLECULAR_FUNCTION	0.0475041	1	0	314	6316	GRMZM5G884270_P02
GO:0018786	haloalkane dehalogenase activity	MOLECULAR_FUNCTION	0.0475041	1	0	314	6316	GRMZM2G117531_P04
GO:0043765	T/G mismatch-specific endonuclease activity	MOLECULAR_FUNCTION	0.0475041	1	0	314	6316	GRMZM2G168744_P01
GO:0019120	hydrolase activity, acting on acid halide bonds, in C-halide compounds	MOLECULAR_FUNCTION	0.0475041	1	0	314	6316	GRMZM2G117531_P04
GO:0008484	sulfuric ester hydrolase activity	MOLECULAR_FUNCTION	0.0475041	1	0	314	6316	GRMZM5G884270_P02
GO:0045181	glutamate synthase activity, NAD(P)H as acceptor	MOLECULAR_FUNCTION	0.0475041	1	0	314	6316	GRMZM2G085078_P01
GO:0019808	polyamine binding	MOLECULAR_FUNCTION	0.0475041	1	0	314	6316	GRMZM2G129071_P01
GO:0016712	oxidoreductase activity, acting on paired donors, with incorporation or reduction of molecular oxygen, reduced flavin or flavoprotein as one donor, and incorporation of one atom of oxygen	MOLECULAR_FUNCTION	0.0475041	1	0	314	6316	GRMZM2G134270_P01
GO:0046554	malate dehydrogenase (NADP+) activity	MOLECULAR_FUNCTION	0.0475041	1	0	314	6316	GRMZM2G129513_P01
GO:0004479	methionyl-tRNA formyltransferase activity	MOLECULAR_FUNCTION	0.0475041	1	0	314	6316	GRMZM2G019437_P01
GO:0033854	glutamate-prephenate aminotransferase activity	MOLECULAR_FUNCTION	0.0475041	1	0	314	6316	GRMZM2G033799_P01
GO:0033853	aspartate-prephenate aminotransferase activity	MOLECULAR_FUNCTION	0.0475041	1	0	314	6316	GRMZM2G033799_P01
GO:0000014	single-stranded DNA endodeoxyribonuclease activity	MOLECULAR_FUNCTION	0.0475041	1	0	314	6316	GRMZM2G168744_P01
GO:0090471	9,15,9-tri-cis-zeta-carotene isomerase activity	MOLECULAR_FUNCTION	0.0475041	1	0	314	6316
GO:0046316	gluconokinase activity	MOLECULAR_FUNCTION	0.0475041	1	0	314	6316
GO:0080048	GDP-D-glucose phosphorylase activity	MOLECULAR_FUNCTION	0.0475041	1	0	314	6316
GO:1990381	ubiquitin-specific protease binding	MOLECULAR_FUNCTION	0.0475041	1	0	314	6316
GO:0003848	2-amino-4-hydroxy-6-hydroxymethyldihydropteridine diphosphokinase activity	MOLECULAR_FUNCTION	0.0475041	1	0	314	6316
GO:0003834	beta-carotene 15,15-monooxygenase activity	MOLECULAR_FUNCTION	0.0475041	1	0	314	6316	GRMZM2G011746_P01
GO:0019001	guanyl nucleotide binding	MOLECULAR_FUNCTION	0.0101635	1	146	314	6170	GRMZM2G149847_P02
GO:0001882	nucleoside binding	MOLECULAR_FUNCTION	0.0102566	1	149	314	6167	GRMZM2G149847_P02
GO:0001883	purine nucleoside binding	MOLECULAR_FUNCTION	0.0101635	1	146	314	6170	GRMZM2G149847_P02
GO:0032561	guanyl ribonucleotide binding	MOLECULAR_FUNCTION	0.0101635	1	146	314	6170	GRMZM2G149847_P02
GO:0032550	purine ribonucleoside binding	MOLECULAR_FUNCTION	0.0101635	1	146	314	6170	GRMZM2G149847_P02
GO:0032549	ribonucleoside binding	MOLECULAR_FUNCTION	0.0102566	1	149	314	6167	GRMZM2G149847_P02
GO:0005525	GTP binding	MOLECULAR_FUNCTION	0.0101635	1	146	314	6170	GRMZM2G149847_P02
GO:0008135	translation factor activity, RNA binding	MOLECULAR_FUNCTION	0.0445933	1	115	314	6201	GRMZM2G013908_P01
GO:0009167	purine ribonucleoside monophosphate metabolic process	BIOLOGICAL_PROCESS	0.000584889	0	166	315	6150
GO:0009168	purine ribonucleoside monophosphate biosynthetic process	BIOLOGICAL_PROCESS	0.0019236	0	139	315	6177
GO:0072525	pyridine-containing compound biosynthetic process	BIOLOGICAL_PROCESS	0.00975707	0	106	315	6210
GO:0006633	fatty acid biosynthetic process	BIOLOGICAL_PROCESS	0.0496224	0	71	315	6245
GO:1901292	nucleoside phosphate catabolic process	BIOLOGICAL_PROCESS	0.0225175	0	92	315	6224
GO:0022618	ribonucleoprotein complex assembly	BIOLOGICAL_PROCESS	0.0329613	0	80	315	6236
GO:0046434	organophosphate catabolic process	BIOLOGICAL_PROCESS	0.0146039	0	97	315	6219
GO:0000096	sulfur amino acid metabolic process	BIOLOGICAL_PROCESS	0.0497937	0	73	315	6243
GO:0042866	pyruvate biosynthetic process	BIOLOGICAL_PROCESS	0.0222584	0	91	315	6225
GO:0046031	ADP metabolic process	BIOLOGICAL_PROCESS	0.0222584	0	91	315	6225
GO:0071826	ribonucleoprotein complex subunit organization	BIOLOGICAL_PROCESS	0.0339349	0	84	315	6232
GO:0006970	response to osmotic stress	BIOLOGICAL_PROCESS	0.0496307	0	72	315	6244
GO:0019363	pyridine nucleotide biosynthetic process	BIOLOGICAL_PROCESS	0.0149537	0	100	315	6216
GO:0019359	nicotinamide nucleotide biosynthetic process	BIOLOGICAL_PROCESS	0.0149537	0	100	315	6216
GO:0006096	glycolytic process	BIOLOGICAL_PROCESS	0.0222584	0	91	315	6225
GO:0009166	nucleotide catabolic process	BIOLOGICAL_PROCESS	0.0222584	0	91	315	6225
GO:0009135	purine nucleoside diphosphate metabolic process	BIOLOGICAL_PROCESS	0.0225175	0	92	315	6224
GO:0009179	purine ribonucleoside diphosphate metabolic process	BIOLOGICAL_PROCESS	0.0225175	0	92	315	6224
GO:0009185	ribonucleoside diphosphate metabolic process	BIOLOGICAL_PROCESS	0.0225175	0	92	315	6224
GO:0006754	ATP biosynthetic process	BIOLOGICAL_PROCESS	0.00649166	0	114	315	6202
GO:0046034	ATP metabolic process	BIOLOGICAL_PROCESS	0.00194094	0	140	315	6176
GO:0009127	purine nucleoside monophosphate biosynthetic process	BIOLOGICAL_PROCESS	0.0019236	0	139	315	6177
GO:0009126	purine nucleoside monophosphate metabolic process	BIOLOGICAL_PROCESS	0.000584889	0	166	315	6150
GO:0006757	ATP generation from ADP	BIOLOGICAL_PROCESS	0.0222584	0	91	315	6225
GO:0016651	oxidoreductase activity, acting on NAD(P)H	MOLECULAR_FUNCTION	0.0497937	0	73	315	6243
GO:0015077	monovalent inorganic cation transmembrane transporter activity	MOLECULAR_FUNCTION	0.0497937	0	73	315	6243
GO:0042626	ATPase activity, coupled to transmembrane movement of substances	MOLECULAR_FUNCTION	0.033046	0	81	315	6235

## Sheet: MElightcyan
GO enrichment analysis of "MElightcyan" module.
GO.ID	GO.Name	GO.Category	P.Value	Nr.Test	Nr.Reference	Non.Annot.Test	Non.Annot.Reference	SeqTest
GO:0008152	metabolic process	BIOLOGICAL_PROCESS	0.00255535	723	3217	417	2274	GRMZM2G336908_P01, GRMZM5G878308_P01, GRMZM2G159221_P01, GRMZM2G069708_P01, GRMZM2G001956_P01, GRMZM2G019446_P01, GRMZM2G130062_P01, GRMZM2G010065_P01, GRMZM5G876898_P01, GRMZM2G003565_P03, GRMZM2G090568_P01, GRMZM2G068963_P01, GRMZM5G851815_P02, GRMZM2G163471_P01, GRMZM2G074097_P01, GRMZM2G120300_P01, GRMZM2G128056_P01, GRMZM2G137648_P01, GRMZM5G830695_P02, GRMZM2G379002_P01, GRMZM5G892645_P02, …
GO:0003824	catalytic activity	MOLECULAR_FUNCTION	2.59149e-05	662	2812	478	2679	GRMZM2G336908_P01, GRMZM5G878308_P01, GRMZM2G069708_P01, GRMZM2G001956_P01, GRMZM2G130062_P01, GRMZM5G876898_P01, GRMZM2G003565_P03, GRMZM2G090568_P01, GRMZM2G068963_P01, GRMZM5G851815_P02, GRMZM2G074097_P01, GRMZM2G120300_P01, GRMZM2G128056_P01, GRMZM2G137648_P01, GRMZM5G830695_P02, GRMZM2G379002_P01, GRMZM5G892645_P02, GRMZM2G102243_P01, GRMZM2G011373_P01, GRMZM2G159678_P02, GRMZM2G006377_P01, …
GO:0005488	binding	MOLECULAR_FUNCTION	0.00685588	588	2590	552	2901	GRMZM2G336908_P01, GRMZM5G878308_P01, GRMZM5G841101_P01, GRMZM2G305582_P01, GRMZM2G159221_P01, GRMZM2G359038_P01, GRMZM2G001956_P01, GRMZM2G019446_P01, GRMZM2G010065_P01, GRMZM2G428391_P01, GRMZM2G003565_P03, GRMZM2G090568_P01, GRMZM2G068963_P01, GRMZM2G163471_P01, GRMZM2G074097_P01, GRMZM2G157329_P01, GRMZM2G137648_P01, GRMZM2G076062_P01, GRMZM5G892645_P02, GRMZM2G102243_P01, GRMZM2G011373_P01, …
GO:0043167	ion binding	MOLECULAR_FUNCTION	0.00339791	392	1644	748	3847	GRMZM2G336908_P01, GRMZM5G878308_P01, GRMZM2G305582_P01, GRMZM2G159221_P01, GRMZM2G359038_P01, GRMZM2G428391_P01, GRMZM2G090568_P01, GRMZM2G074097_P01, GRMZM5G892645_P02, GRMZM2G102243_P01, GRMZM2G031496_P01, GRMZM2G005771_P02, GRMZM2G100794_P01, GRMZM5G843748_P02, GRMZM2G320269_P01, GRMZM2G161459_P02, GRMZM2G150912_P01, GRMZM2G072174_P01, GRMZM2G046658_P02, GRMZM2G097775_P01, GRMZM2G018484_P01, …
GO:0097159	organic cyclic compound binding	MOLECULAR_FUNCTION	0.0391112	391	1711	749	3780	GRMZM2G336908_P01, GRMZM5G841101_P01, GRMZM2G305582_P01, GRMZM2G359038_P01, GRMZM2G001956_P01, GRMZM2G019446_P01, GRMZM2G428391_P01, GRMZM2G090568_P01, GRMZM2G068963_P01, GRMZM2G163471_P01, GRMZM2G157329_P01, GRMZM2G076062_P01, GRMZM5G892645_P02, GRMZM2G031496_P01, GRMZM5G813627_P02, GRMZM5G879527_P04, GRMZM2G132607_P01, GRMZM2G168143_P01, GRMZM2G100794_P01, GRMZM5G843748_P02, GRMZM2G138987_P02, …
GO:1901363	heterocyclic compound binding	MOLECULAR_FUNCTION	0.0461066	390	1710	750	3781	GRMZM2G336908_P01, GRMZM5G841101_P01, GRMZM2G305582_P01, GRMZM2G359038_P01, GRMZM2G001956_P01, GRMZM2G019446_P01, GRMZM2G428391_P01, GRMZM2G090568_P01, GRMZM2G068963_P01, GRMZM2G163471_P01, GRMZM2G157329_P01, GRMZM2G076062_P01, GRMZM5G892645_P02, GRMZM2G031496_P01, GRMZM5G813627_P02, GRMZM5G879527_P04, GRMZM2G132607_P01, GRMZM2G168143_P01, GRMZM2G100794_P01, GRMZM5G843748_P02, GRMZM2G138987_P02, …
GO:0016787	hydrolase activity	MOLECULAR_FUNCTION	0.00130103	260	1022	880	4469	GRMZM2G336908_P01, GRMZM2G469162_P01, GRMZM2G032110_P01, GRMZM2G025882_P01, GRMZM2G120300_P01, GRMZM2G128056_P01, GRMZM2G174249_P06, GRMZM5G830695_P02, GRMZM2G379002_P01, GRMZM5G892645_P02, GRMZM2G080044_P01, GRMZM2G163749_P01, GRMZM2G075676_P03, GRMZM2G012758_P01, GRMZM2G031461_P01, GRMZM2G006377_P01, GRMZM2G315931_P01, GRMZM2G004377_P02, AC155377.1_FGP002, GRMZM2G159160_P01, GRMZM2G035503_P01, …
GO:0044260	cellular macromolecule metabolic process	BIOLOGICAL_PROCESS	0.0272242	259	1421	881	4070	GRMZM2G336908_P01, GRMZM2G159221_P01, GRMZM2G001956_P01, GRMZM2G019446_P01, GRMZM2G044247_P01, GRMZM2G054896_P01, GRMZM2G025882_P01, GRMZM2G136522_P01, GRMZM2G068963_P01, GRMZM2G019926_P03, GRMZM2G163471_P01, GRMZM2G128056_P01, GRMZM5G830695_P02, GRMZM2G102243_P01, GRMZM2G075676_P03, GRMZM5G879527_P04, GRMZM2G103896_P01, GRMZM2G031461_P01, GRMZM2G006377_P01, GRMZM2G004377_P02, GRMZM2G178826_P03, …
GO:0009058	biosynthetic process	BIOLOGICAL_PROCESS	0.00297607	256	1464	884	4027	GRMZM2G336908_P01, GRMZM2G159221_P01, GRMZM2G069708_P01, GRMZM2G019446_P01, GRMZM2G130062_P01, GRMZM2G044247_P01, GRMZM2G054896_P01, GRMZM5G876898_P01, GRMZM2G025882_P01, GRMZM2G136522_P01, GRMZM2G163471_P01, GRMZM2G098290_P02, GRMZM2G074097_P01, GRMZM2G120300_P01, GRMZM2G136344_P02, GRMZM2G379002_P01, GRMZM2G009808_P01, GRMZM5G879527_P04, GRMZM2G103896_P01, GRMZM2G328893_P01, GRMZM2G178826_P03, …
GO:1901576	organic substance biosynthetic process	BIOLOGICAL_PROCESS	0.00603333	248	1408	892	4083	GRMZM2G336908_P01, GRMZM2G159221_P01, GRMZM2G069708_P01, GRMZM2G019446_P01, GRMZM2G130062_P01, GRMZM2G044247_P01, GRMZM2G054896_P01, GRMZM5G876898_P01, GRMZM2G025882_P01, GRMZM2G136522_P01, GRMZM2G163471_P01, GRMZM2G098290_P02, GRMZM2G074097_P01, GRMZM2G120300_P01, GRMZM2G136344_P02, GRMZM2G379002_P01, GRMZM2G009808_P01, GRMZM5G879527_P04, GRMZM2G103896_P01, GRMZM2G328893_P01, GRMZM2G178826_P03, …
GO:0043169	cation binding	MOLECULAR_FUNCTION	8.638e-06	244	870	896	4621	GRMZM2G336908_P01, GRMZM5G878308_P01, GRMZM2G305582_P01, GRMZM2G159221_P01, GRMZM2G040247_P01, GRMZM2G702490_P02, GRMZM2G432566_P02, GRMZM2G090568_P01, GRMZM2G019926_P03, GRMZM2G074097_P01, GRMZM2G129208_P01, GRMZM2G102243_P01, GRMZM2G009808_P01, GRMZM2G031496_P01, GRMZM2G139512_P02, GRMZM2G031461_P01, GRMZM2G405459_P01, GRMZM2G315931_P01, GRMZM2G004377_P02, GRMZM2G129208_P03, GRMZM2G005771_P02, …
GO:0034641	cellular nitrogen compound metabolic process	BIOLOGICAL_PROCESS	0.00512864	243	1386	897	4105	GRMZM2G336908_P01, GRMZM5G878308_P01, GRMZM2G159221_P01, GRMZM2G019446_P01, GRMZM2G044247_P01, GRMZM2G054896_P01, GRMZM2G479000_P01, GRMZM2G032110_P01, GRMZM2G025882_P01, GRMZM2G136522_P01, GRMZM2G163471_P01, GRMZM2G098290_P02, GRMZM2G074097_P01, GRMZM2G137648_P01, GRMZM5G892645_P02, GRMZM2G009808_P01, GRMZM5G813627_P02, GRMZM5G879527_P04, GRMZM2G103896_P01, GRMZM2G005771_P02, GRMZM2G176397_P01, …
GO:0046872	metal ion binding	MOLECULAR_FUNCTION	1.76188e-05	240	862	900	4629	GRMZM2G336908_P01, GRMZM5G878308_P01, GRMZM2G305582_P01, GRMZM2G159221_P01, GRMZM2G040247_P01, GRMZM2G702490_P02, GRMZM2G432566_P02, GRMZM2G090568_P01, GRMZM2G019926_P03, GRMZM2G074097_P01, GRMZM2G129208_P01, GRMZM2G102243_P01, GRMZM2G009808_P01, GRMZM2G031496_P01, GRMZM2G139512_P02, GRMZM2G031461_P01, GRMZM2G405459_P01, GRMZM2G315931_P01, GRMZM2G004377_P02, GRMZM2G129208_P03, GRMZM2G005771_P02, …
GO:0044249	cellular biosynthetic process	BIOLOGICAL_PROCESS	0.00645387	233	1330	907	4161	GRMZM2G336908_P01, GRMZM2G159221_P01, GRMZM2G069708_P01, GRMZM2G019446_P01, GRMZM2G130062_P01, GRMZM2G044247_P01, GRMZM2G054896_P01, GRMZM5G876898_P01, GRMZM2G025882_P01, GRMZM2G136522_P01, GRMZM2G163471_P01, GRMZM2G098290_P02, GRMZM2G074097_P01, GRMZM2G136344_P02, GRMZM2G379002_P01, GRMZM2G009808_P01, GRMZM5G879527_P04, GRMZM2G103896_P01, GRMZM2G328893_P01, GRMZM2G178826_P03, GRMZM2G074015_P02, …
GO:0019538	protein metabolic process	BIOLOGICAL_PROCESS	0.0263001	216	1203	924	4288	GRMZM2G336908_P01, GRMZM2G001956_P01, GRMZM2G054896_P01, GRMZM2G025882_P01, GRMZM2G068963_P01, GRMZM2G019926_P03, GRMZM2G163471_P01, GRMZM2G128056_P01, GRMZM5G830695_P02, GRMZM2G379002_P01, GRMZM2G163749_P01, GRMZM2G102243_P01, GRMZM2G075676_P03, GRMZM2G031461_P01, GRMZM2G006377_P01, GRMZM2G004377_P02, AC155377.1_FGP002, GRMZM2G159160_P01, GRMZM2G130085_P03, GRMZM2G137788_P01, GRMZM2G035708_P07, …
GO:0044281	small molecule metabolic process	BIOLOGICAL_PROCESS	0.0305787	210	867	930	4624	GRMZM2G336908_P01, GRMZM5G878308_P01, GRMZM2G069708_P01, GRMZM2G130062_P01, GRMZM2G044247_P01, GRMZM2G702490_P02, GRMZM5G876898_P01, GRMZM2G025882_P01, GRMZM2G003565_P03, GRMZM2G136522_P01, GRMZM2G019926_P03, GRMZM2G098290_P02, GRMZM2G074097_P01, GRMZM2G120300_P01, GRMZM2G137648_P01, GRMZM2G136344_P02, GRMZM2G009808_P01, GRMZM2G328893_P01, GRMZM2G132607_P01, GRMZM2G178826_P03, GRMZM2G130085_P03, …
GO:0006796	phosphate-containing compound metabolic process	BIOLOGICAL_PROCESS	6.74253e-05	190	668	950	4823	GRMZM5G862488_P03, GRMZM5G878308_P01, GRMZM2G306345_P05, GRMZM2G015073_P01, GRMZM2G010065_P01, GRMZM2G306345_P01, GRMZM5G861064_P01, GRMZM2G027043_P01, GRMZM2G025882_P01, GRMZM2G136522_P01, AC234201.1_FGP003, GRMZM2G019926_P03, GRMZM2G098290_P02, GRMZM2G127374_P01, GRMZM2G137648_P01, GRMZM2G379002_P01, GRMZM6G828652_P01, GRMZM2G064302_P01, GRMZM2G009808_P01, GRMZM2G008263_P02, GRMZM2G098078_P02, …
GO:0006793	phosphorus metabolic process	BIOLOGICAL_PROCESS	0.000261294	190	689	950	4802	GRMZM5G862488_P03, GRMZM5G878308_P01, GRMZM2G306345_P05, GRMZM2G015073_P01, GRMZM2G010065_P01, GRMZM2G306345_P01, GRMZM5G861064_P01, GRMZM2G027043_P01, GRMZM2G025882_P01, GRMZM2G136522_P01, AC234201.1_FGP003, GRMZM2G019926_P03, GRMZM2G098290_P02, GRMZM2G127374_P01, GRMZM2G137648_P01, GRMZM2G379002_P01, GRMZM6G828652_P01, GRMZM2G064302_P01, GRMZM2G009808_P01, GRMZM2G008263_P02, GRMZM2G098078_P02, …
GO:0055114	oxidation-reduction process	BIOLOGICAL_PROCESS	1.40356e-05	184	623	956	4868	GRMZM5G878308_P01, GRMZM2G117507_P01, GRMZM5G898880_P01, GRMZM2G087598_P02, GRMZM2G069708_P01, GRMZM2G044247_P01, GRMZM2G088601_P03, GRMZM5G891783_P01, GRMZM2G025882_P01, GRMZM2G136522_P01, GRMZM2G090568_P01, GRMZM5G891783_P02, GRMZM2G148790_P02, GRMZM5G851815_P02, AC234201.1_FGP003, GRMZM2G074097_P01, GRMZM5G874448_P01, GRMZM2G335657_P01, GRMZM2G120300_P01, GRMZM2G151169_P01, GRMZM2G137648_P01, …
GO:0044267	cellular protein metabolic process	BIOLOGICAL_PROCESS	0.0044961	179	1060	961	4431	GRMZM2G336908_P01, GRMZM2G018950_P01, GRMZM2G087598_P02, GRMZM2G306345_P05, GRMZM2G001956_P01, GRMZM2G015073_P01, GRMZM2G054896_P01, GRMZM2G150337_P03, GRMZM2G306345_P01, GRMZM2G165917_P03, GRMZM2G025882_P01, GRMZM2G057535_P01, GRMZM2G068963_P01, AC234201.1_FGP003, GRMZM2G019926_P03, GRMZM2G163471_P01, GRMZM2G127374_P01, GRMZM2G128056_P01, GRMZM5G830695_P02, GRMZM2G102243_P01, GRMZM2G075676_P03, …
GO:0016491	oxidoreductase activity	MOLECULAR_FUNCTION	0.000658748	162	583	978	4908	GRMZM5G878308_P01, GRMZM2G117507_P01, GRMZM5G898880_P01, GRMZM2G069708_P01, GRMZM2G044247_P01, GRMZM2G088601_P03, GRMZM5G891783_P01, GRMZM2G136522_P01, GRMZM2G090568_P01, GRMZM5G891783_P02, GRMZM2G148790_P02, GRMZM5G851815_P02, AC234201.1_FGP003, GRMZM2G074097_P01, GRMZM5G874448_P01, GRMZM2G335657_P01, GRMZM2G120300_P01, GRMZM2G151169_P01, GRMZM2G137648_P01, GRMZM2G463640_P01, GRMZM2G136344_P02, …
GO:0044271	cellular nitrogen compound biosynthetic process	BIOLOGICAL_PROCESS	0.0303754	160	914	980	4577	GRMZM5G862488_P03, GRMZM2G336908_P01, GRMZM2G159221_P01, GRMZM2G019446_P01, GRMZM2G044247_P01, GRMZM2G054896_P01, GRMZM5G861064_P01, GRMZM2G027043_P01, GRMZM2G165917_P03, GRMZM2G025882_P01, GRMZM2G136522_P01, GRMZM2G057535_P01, GRMZM2G163471_P01, GRMZM2G098290_P02, GRMZM2G074097_P01, GRMZM2G064302_P01, GRMZM2G009808_P01, GRMZM2G047867_P01, GRMZM2G064159_P01, GRMZM5G879527_P04, GRMZM5G833389_P02, …
GO:0005975	carbohydrate metabolic process	BIOLOGICAL_PROCESS	4.70914e-10	149	394	991	5097	GRMZM2G164676_P02, GRMZM2G075958_P01, GRMZM2G097207_P01, GRMZM2G158043_P02, GRMZM2G003565_P03, GRMZM2G136522_P01, GRMZM2G098290_P02, GRMZM2G127374_P01, GRMZM2G174249_P06, GRMZM6G828652_P01, GRMZM2G137077_P01, GRMZM2G064302_P01, GRMZM2G123277_P01, GRMZM2G009808_P01, GRMZM2G011373_P01, GRMZM2G138060_P01, GRMZM2G012758_P01, GRMZM2G008263_P02, GRMZM2G412611_P01, GRMZM2G147687_P03, GRMZM5G833389_P02, …
GO:0009056	catabolic process	BIOLOGICAL_PROCESS	9.82497e-05	149	502	991	4989	GRMZM2G018950_P01, GRMZM2G087598_P02, GRMZM2G702490_P02, GRMZM5G876898_P01, GRMZM2G003565_P03, GRMZM2G136522_P01, GRMZM2G090568_P01, AC234201.1_FGP003, GRMZM2G019926_P03, GRMZM2G098290_P02, GRMZM2G127374_P01, GRMZM2G120300_P01, GRMZM2G128056_P01, GRMZM5G830695_P02, GRMZM2G064302_P01, GRMZM2G009808_P01, GRMZM2G075676_P03, GRMZM2G412611_P01, GRMZM2G147687_P03, GRMZM5G833389_P02, GRMZM2G365774_P01, …
GO:0140096	catalytic activity, acting on a protein	MOLECULAR_FUNCTION	0.03856	147	591	993	4900	GRMZM2G018950_P01, GRMZM2G087598_P02, GRMZM2G306345_P05, GRMZM2G001956_P01, GRMZM2G015073_P01, GRMZM2G000719_P01, GRMZM2G150337_P03, GRMZM2G306345_P01, GRMZM2G068963_P01, GRMZM2G019926_P03, GRMZM2G127374_P01, GRMZM2G128056_P01, GRMZM5G830695_P02, GRMZM2G379002_P01, GRMZM2G163749_P01, GRMZM2G102243_P01, GRMZM2G075676_P03, GRMZM2G098078_P02, GRMZM2G031461_P01, GRMZM2G006377_P01, GRMZM2G065757_P01, …
GO:1901566	organonitrogen compound biosynthetic process	BIOLOGICAL_PROCESS	0.0148117	141	832	999	4659	GRMZM5G862488_P03, GRMZM2G336908_P01, GRMZM2G130062_P01, GRMZM2G044247_P01, GRMZM2G054896_P01, GRMZM5G861064_P01, GRMZM2G027043_P01, GRMZM2G165917_P03, GRMZM5G876898_P01, GRMZM2G025882_P01, GRMZM2G136522_P01, GRMZM2G057535_P01, GRMZM2G163471_P01, GRMZM2G098290_P02, GRMZM2G074097_P01, GRMZM2G064302_P01, GRMZM2G009808_P01, GRMZM2G047867_P01, GRMZM2G064159_P01, GRMZM5G833389_P02, GRMZM2G328893_P01, …
GO:0010467	gene expression	BIOLOGICAL_PROCESS	1.37537e-06	124	902	1016	4589	GRMZM2G336908_P01, GRMZM2G159221_P01, GRMZM2G019446_P01, GRMZM2G044247_P01, GRMZM2G054896_P01, GRMZM2G032110_P01, GRMZM2G165917_P03, GRMZM2G455115_P01, GRMZM2G057535_P01, GRMZM2G079658_P02, GRMZM2G163471_P01, GRMZM5G892645_P02, GRMZM2G011373_P01, GRMZM5G813627_P02, GRMZM2G005737_P01, GRMZM5G879527_P04, GRMZM2G103896_P01, GRMZM2G038066_P01, GRMZM2G455085_P01, GRMZM2G137849_P01, GRMZM2G407996_P01, …
GO:1901575	organic substance catabolic process	BIOLOGICAL_PROCESS	0.00300758	124	445	1016	5046	GRMZM2G018950_P01, GRMZM2G087598_P02, GRMZM2G702490_P02, GRMZM5G876898_P01, GRMZM2G003565_P03, AC234201.1_FGP003, GRMZM2G019926_P03, GRMZM2G098290_P02, GRMZM2G127374_P01, GRMZM2G120300_P01, GRMZM2G128056_P01, GRMZM5G830695_P02, GRMZM2G064302_P01, GRMZM2G009808_P01, GRMZM2G075676_P03, GRMZM2G412611_P01, GRMZM2G147687_P03, GRMZM5G833389_P02, GRMZM2G031461_P01, GRMZM2G006377_P01, GRMZM2G065757_P01, …
GO:0044248	cellular catabolic process	BIOLOGICAL_PROCESS	0.00449982	124	450	1016	5041	GRMZM2G018950_P01, GRMZM2G087598_P02, GRMZM2G702490_P02, GRMZM5G876898_P01, GRMZM2G136522_P01, GRMZM2G090568_P01, AC234201.1_FGP003, GRMZM2G019926_P03, GRMZM2G098290_P02, GRMZM2G127374_P01, GRMZM2G120300_P01, GRMZM2G128056_P01, GRMZM2G064302_P01, GRMZM2G009808_P01, GRMZM2G075676_P03, GRMZM2G412611_P01, GRMZM5G833389_P02, GRMZM2G365774_P01, GRMZM2G031461_P01, GRMZM2G006377_P01, GRMZM2G405459_P01, …
GO:0090304	nucleic acid metabolic process	BIOLOGICAL_PROCESS	0.0259114	118	701	1022	4790	GRMZM2G159221_P01, GRMZM2G019446_P01, GRMZM2G044247_P01, GRMZM2G479000_P01, GRMZM2G032110_P01, GRMZM2G455115_P01, GRMZM2G079658_P02, GRMZM2G169333_P07, GRMZM5G892645_P02, GRMZM5G813627_P02, GRMZM2G005737_P01, GRMZM5G879527_P04, GRMZM2G103896_P01, GRMZM2G038066_P01, GRMZM2G005771_P02, GRMZM2G090172_P01, GRMZM2G455085_P01, GRMZM2G008456_P01, GRMZM2G014180_P04, GRMZM2G161459_P02, GRMZM2G081745_P01, …
GO:0016310	phosphorylation	BIOLOGICAL_PROCESS	0.000382431	114	377	1026	5114	GRMZM5G878308_P01, GRMZM2G306345_P05, GRMZM2G015073_P01, GRMZM2G306345_P01, GRMZM2G019926_P03, GRMZM2G098290_P02, GRMZM2G137648_P01, GRMZM6G828652_P01, GRMZM2G064302_P01, GRMZM2G009808_P01, GRMZM2G098078_P02, GRMZM2G412611_P01, GRMZM2G159678_P02, GRMZM5G833389_P02, GRMZM2G151738_P01, GRMZM2G132607_P01, GRMZM2G074015_P02, GRMZM2G411668_P01, GRMZM2G176397_P01, GRMZM2G010349_P02, GRMZM2G137788_P01, …
GO:0048037	cofactor binding	MOLECULAR_FUNCTION	0.00111163	114	390	1026	5101	GRMZM5G878308_P01, GRMZM5G891783_P01, GRMZM2G090568_P01, GRMZM5G891783_P02, GRMZM5G874448_P01, GRMZM2G335657_P01, GRMZM2G151169_P01, GRMZM2G137648_P01, GRMZM2G463640_P01, GRMZM2G136344_P02, GRMZM2G129208_P01, GRMZM2G009808_P01, GRMZM2G031496_P01, GRMZM2G365774_P01, GRMZM2G405459_P01, GRMZM2G328893_P01, GRMZM2G129208_P03, GRMZM5G843748_P02, GRMZM2G176397_P01, GRMZM2G151977_P01, GRMZM2G068639_P01, …
GO:0006091	generation of precursor metabolites and energy	BIOLOGICAL_PROCESS	5.83767e-11	108	238	1032	5253	GRMZM5G878308_P01, GRMZM2G087598_P02, GRMZM2G044247_P01, GRMZM2G479000_P01, GRMZM2G025882_P01, GRMZM2G098290_P02, GRMZM5G874448_P01, GRMZM2G335657_P01, GRMZM2G151169_P01, GRMZM2G137648_P01, GRMZM2G463640_P01, GRMZM2G064302_P01, GRMZM2G009808_P01, GRMZM2G011373_P01, GRMZM2G138060_P01, GRMZM5G833389_P02, GRMZM2G315931_P01, GRMZM2G168143_P01, GRMZM2G130085_P03, GRMZM2G176397_P01, GRMZM2G010349_P02, …
GO:0009059	macromolecule biosynthetic process	BIOLOGICAL_PROCESS	3.02378e-06	107	793	1033	4698	GRMZM2G336908_P01, GRMZM2G159221_P01, GRMZM2G019446_P01, GRMZM2G044247_P01, GRMZM2G054896_P01, GRMZM2G165917_P03, GRMZM2G136522_P01, GRMZM2G057535_P01, GRMZM2G163471_P01, GRMZM2G138060_P01, GRMZM5G879527_P04, GRMZM2G008263_P02, GRMZM2G103896_P01, GRMZM2G038066_P01, GRMZM2G178826_P03, GRMZM2G455085_P01, GRMZM2G130085_P03, GRMZM2G073054_P02, GRMZM2G137849_P01, GRMZM2G407996_P01, GRMZM2G008456_P01, …
GO:1901135	carbohydrate derivative metabolic process	BIOLOGICAL_PROCESS	0.00291663	106	368	1034	5123	GRMZM5G878308_P01, GRMZM5G861064_P01, GRMZM2G025882_P01, GRMZM2G136522_P01, GRMZM2G098290_P02, GRMZM2G137648_P01, GRMZM2G064302_P01, GRMZM2G009808_P01, GRMZM2G138060_P01, GRMZM5G833389_P02, GRMZM2G178960_P01, GRMZM2G130085_P03, GRMZM2G176397_P01, GRMZM5G834128_P01, GRMZM2G083016_P01, GRMZM2G081745_P01, GRMZM2G099630_P01, GRMZM2G023163_P01, GRMZM2G051806_P01, GRMZM2G147450_P01, GRMZM2G111164_P04, …
GO:0034645	cellular macromolecule biosynthetic process	BIOLOGICAL_PROCESS	4.02621e-06	105	779	1035	4712	GRMZM2G336908_P01, GRMZM2G159221_P01, GRMZM2G019446_P01, GRMZM2G044247_P01, GRMZM2G054896_P01, GRMZM2G165917_P03, GRMZM2G136522_P01, GRMZM2G057535_P01, GRMZM2G163471_P01, GRMZM5G879527_P04, GRMZM2G008263_P02, GRMZM2G103896_P01, GRMZM2G038066_P01, GRMZM2G178826_P03, GRMZM2G455085_P01, GRMZM2G130085_P03, GRMZM2G073054_P02, GRMZM2G137849_P01, GRMZM2G407996_P01, GRMZM2G008456_P01, GRMZM2G379758_P01, …
GO:0016070	RNA metabolic process	BIOLOGICAL_PROCESS	0.041881	105	620	1035	4871	GRMZM2G159221_P01, GRMZM2G019446_P01, GRMZM2G044247_P01, GRMZM2G479000_P01, GRMZM2G032110_P01, GRMZM2G455115_P01, GRMZM2G079658_P02, GRMZM5G892645_P02, GRMZM5G813627_P02, GRMZM2G005737_P01, GRMZM5G879527_P04, GRMZM2G103896_P01, GRMZM2G038066_P01, GRMZM2G005771_P02, GRMZM2G455085_P01, GRMZM2G008456_P01, GRMZM2G014180_P04, GRMZM2G161459_P02, GRMZM2G099630_P01, GRMZM5G858556_P01, GRMZM2G072174_P01, …
GO:0017144	drug metabolic process	BIOLOGICAL_PROCESS	1.56577e-06	104	287	1036	5204	GRMZM2G336908_P01, GRMZM5G878308_P01, GRMZM5G861064_P01, GRMZM5G876898_P01, GRMZM2G136522_P01, GRMZM2G090568_P01, GRMZM2G098290_P02, GRMZM2G074097_P01, GRMZM2G151169_P01, GRMZM2G137648_P01, GRMZM2G064302_P01, GRMZM2G009808_P01, GRMZM2G129781_P01, GRMZM2G008263_P02, GRMZM5G833389_P02, GRMZM2G365774_P01, GRMZM2G405459_P01, GRMZM5G843748_P02, GRMZM2G176397_P01, GRMZM5G834128_P01, GRMZM2G320269_P01, …
GO:0051186	cofactor metabolic process	BIOLOGICAL_PROCESS	0.000100516	103	318	1037	5173	GRMZM5G862488_P03, GRMZM2G099045_P01, GRMZM2G069708_P01, GRMZM5G876898_P01, GRMZM2G025882_P01, GRMZM2G136522_P01, GRMZM2G090568_P01, GRMZM2G098290_P02, GRMZM2G064302_P01, GRMZM2G129208_P01, GRMZM2G009808_P01, GRMZM2G031496_P01, GRMZM2G129781_P01, GRMZM5G833389_P02, GRMZM2G365774_P01, GRMZM2G405459_P01, GRMZM2G129208_P03, GRMZM2G178960_P01, GRMZM5G843748_P02, GRMZM2G176397_P01, GRMZM2G458824_P01, …
GO:0042221	response to chemical	BIOLOGICAL_PROCESS	0.0300932	97	367	1043	5124	GRMZM2G359038_P01, GRMZM5G861064_P01, GRMZM2G136522_P01, GRMZM2G090568_P01, AC234201.1_FGP003, GRMZM2G019926_P03, GRMZM2G098290_P02, GRMZM2G041050_P02, GRMZM2G136344_P02, GRMZM2G009808_P01, GRMZM2G064473_P01, GRMZM2G365774_P01, GRMZM2G405459_P01, GRMZM5G843748_P02, GRMZM2G176397_P01, GRMZM2G007907_P01, GRMZM2G320269_P01, GRMZM2G099630_P01, GRMZM5G890665_P02, GRMZM2G046658_P02, GRMZM2G117811_P01, …
GO:0019637	organophosphate metabolic process	BIOLOGICAL_PROCESS	0.00804624	94	334	1046	5157	GRMZM5G862488_P03, GRMZM2G145854_P01, GRMZM5G878308_P01, GRMZM2G368902_P01, GRMZM2G104325_P01, GRMZM5G808402_P01, GRMZM2G009785_P01, GRMZM2G023387_P01, GRMZM2G029573_P01, GRMZM5G861064_P01, GRMZM2G027043_P01, GRMZM2G025882_P01, GRMZM2G136522_P01, GRMZM2G122715_P02, AC234201.1_FGP003, GRMZM2G162529_P01, GRMZM2G098290_P02, GRMZM2G443985_P01, GRMZM2G137648_P01, GRMZM2G379002_P01, GRMZM2G064302_P01, …
GO:0015979	photosynthesis	BIOLOGICAL_PROCESS	6.30257e-13	78	128	1062	5363	GRMZM2G087598_P02, GRMZM2G306345_P05, GRMZM2G044247_P01, GRMZM5G891783_P01, GRMZM2G306345_P01, GRMZM2G479000_P01, GRMZM5G839422_P01, GRMZM2G025882_P01, GRMZM2G094224_P01, GRMZM2G118646_P01, GRMZM2G122715_P02, GRMZM5G891783_P02, GRMZM2G162529_P01, GRMZM2G111216_P01, GRMZM5G874448_P01, GRMZM2G463640_P01, GRMZM2G009808_P01, GRMZM2G011373_P01, GRMZM5G866223_P01, GRMZM2G312910_P02, GRMZM2G315931_P01, …
GO:0090407	organophosphate biosynthetic process	BIOLOGICAL_PROCESS	0.00982791	77	265	1063	5226	GRMZM5G862488_P03, GRMZM2G368902_P01, GRMZM2G104325_P01, GRMZM5G808402_P01, GRMZM2G009785_P01, GRMZM2G023387_P01, GRMZM2G029573_P01, GRMZM5G861064_P01, GRMZM2G027043_P01, GRMZM2G025882_P01, GRMZM2G136522_P01, GRMZM2G122715_P02, GRMZM2G162529_P01, GRMZM2G098290_P02, GRMZM2G443985_P01, GRMZM2G379002_P01, GRMZM2G064302_P01, GRMZM2G339699_P01, GRMZM2G009808_P01, GRMZM2G377761_P01, GRMZM2G082998_P01, …
GO:0055085	transmembrane transport	BIOLOGICAL_PROCESS	0.0213569	74	263	1066	5228	GRMZM2G167463_P01, GRMZM2G104325_P01, GRMZM5G808402_P01, GRMZM2G174107_P01, GRMZM2G083173_P01, GRMZM2G060742_P04, GRMZM5G861064_P01, GRMZM2G092780_P01, GRMZM5G839422_P01, GRMZM2G098290_P02, GRMZM2G096683_P01, GRMZM2G041050_P02, GRMZM2G085301_P01, GRMZM2G104730_P02, GRMZM2G057616_P01, GRMZM2G069095_P01, GRMZM2G032936_P01, GRMZM2G158097_P02, GRMZM2G315931_P01, GRMZM2G181151_P01, GRMZM2G088196_P01, …
GO:0009628	response to abiotic stimulus	BIOLOGICAL_PROCESS	0.0111114	71	242	1069	5249	GRMZM2G040247_P01, GRMZM2G180909_P01, AC211394.4_FGP004, GRMZM2G087598_P02, GRMZM5G856084_P01, GRMZM2G009785_P01, GRMZM2G025882_P01, GRMZM2G003565_P03, GRMZM2G122715_P02, GRMZM2G162529_P01, GRMZM2G111216_P01, GRMZM2G098290_P02, GRMZM2G136344_P02, GRMZM2G044744_P01, GRMZM2G009808_P01, GRMZM2G312910_P02, GRMZM2G008263_P02, GRMZM2G412611_P01, GRMZM2G158097_P02, GRMZM2G065083_P01, GRMZM2G067176_P01, …
GO:0008233	peptidase activity	MOLECULAR_FUNCTION	0.0155832	68	235	1072	5256	GRMZM2G018950_P01, GRMZM2G087598_P02, GRMZM2G000719_P01, GRMZM2G047319_P01, GRMZM2G077233_P03, GRMZM2G077541_P02, GRMZM2G130053_P01, GRMZM2G348873_P01, GRMZM2G118646_P01, GRMZM2G133029_P01, GRMZM2G128056_P01, GRMZM2G379002_P01, GRMZM2G163749_P01, GRMZM2G075676_P03, GRMZM2G159016_P01, GRMZM2G140432_P01, GRMZM2G006377_P01, GRMZM2G065757_P01, GRMZM2G157156_P02, GRMZM2G050186_P03, GRMZM2G108849_P04, …
GO:0003723	RNA binding	MOLECULAR_FUNCTION	0.0256277	67	427	1073	5064	GRMZM2G126120_P01, GRMZM2G123537_P01, GRMZM2G180909_P01, GRMZM2G166713_P01, GRMZM2G025281_P02, GRMZM2G054896_P01, GRMZM2G165917_P03, GRMZM2G103430_P02, GRMZM2G088114_P01, GRMZM2G455115_P01, GRMZM2G030659_P01, GRMZM2G057535_P01, GRMZM2G079658_P02, GRMZM2G163471_P01, GRMZM2G090869_P01, GRMZM2G129804_P01, GRMZM2G076062_P01, GRMZM5G892645_P02, GRMZM2G042173_P01, GRMZM2G009808_P01, GRMZM2G028156_P01, …
GO:0006753	nucleoside phosphate metabolic process	BIOLOGICAL_PROCESS	0.0338418	65	233	1075	5258	GRMZM5G862488_P03, GRMZM2G145854_P01, GRMZM5G878308_P01, GRMZM2G368902_P01, GRMZM2G104325_P01, GRMZM5G808402_P01, GRMZM2G029573_P01, GRMZM5G861064_P01, GRMZM2G027043_P01, GRMZM2G162529_P01, GRMZM2G098290_P02, GRMZM2G443985_P01, GRMZM2G137648_P01, GRMZM2G064302_P01, GRMZM2G339699_P01, GRMZM2G009808_P01, GRMZM5G833389_P02, GRMZM2G079888_P01, GRMZM2G065083_P01, GRMZM2G067176_P01, GRMZM2G142836_P01, …
GO:0009117	nucleotide metabolic process	BIOLOGICAL_PROCESS	0.0338418	65	233	1075	5258	GRMZM5G862488_P03, GRMZM2G145854_P01, GRMZM5G878308_P01, GRMZM2G368902_P01, GRMZM2G104325_P01, GRMZM5G808402_P01, GRMZM2G029573_P01, GRMZM5G861064_P01, GRMZM2G027043_P01, GRMZM2G162529_P01, GRMZM2G098290_P02, GRMZM2G443985_P01, GRMZM2G137648_P01, GRMZM2G064302_P01, GRMZM2G339699_P01, GRMZM2G009808_P01, GRMZM5G833389_P02, GRMZM2G079888_P01, GRMZM2G065083_P01, GRMZM2G067176_P01, GRMZM2G142836_P01, …
GO:0070011	peptidase activity, acting on L-amino acid peptides	MOLECULAR_FUNCTION	0.0035857	64	202	1076	5289	GRMZM2G018950_P01, GRMZM2G087598_P02, GRMZM2G000719_P01, GRMZM2G047319_P01, GRMZM2G077233_P03, GRMZM2G130053_P01, GRMZM2G348873_P01, GRMZM2G118646_P01, GRMZM2G133029_P01, GRMZM2G128056_P01, GRMZM2G379002_P01, GRMZM2G163749_P01, GRMZM2G075676_P03, GRMZM2G159016_P01, GRMZM2G140432_P01, GRMZM2G006377_P01, GRMZM2G065757_P01, GRMZM2G157156_P02, GRMZM2G050186_P03, GRMZM2G108849_P04, AC155377.1_FGP002, …
GO:0022857	transmembrane transporter activity	MOLECULAR_FUNCTION	0.00115074	63	188	1077	5303	GRMZM2G018607_P01, GRMZM2G167463_P01, GRMZM2G359038_P01, GRMZM2G104325_P01, GRMZM5G808402_P01, GRMZM2G174107_P01, GRMZM2G083173_P01, GRMZM5G861064_P01, GRMZM2G092780_P01, GRMZM2G025123_P01, GRMZM2G096683_P01, GRMZM2G041050_P02, GRMZM2G085301_P01, GRMZM2G104730_P02, GRMZM2G057616_P01, GRMZM2G064473_P01, GRMZM2G069095_P01, GRMZM2G032936_P01, GRMZM2G315931_P01, GRMZM2G181151_P01, GRMZM2G088196_P01, …
GO:0005515	protein binding	MOLECULAR_FUNCTION	0.0302195	63	402	1077	5089	GRMZM2G410991_P01, GRMZM2G040247_P01, GRMZM5G856084_P01, GRMZM2G305115_P01, GRMZM2G051879_P05, GRMZM2G077233_P03, GRMZM2G003565_P03, GRMZM2G136522_P01, GRMZM2G039886_P01, GRMZM2G163471_P01, GRMZM2G098397_P01, GRMZM2G155974_P01, GRMZM2G104730_P02, GRMZM2G009808_P01, GRMZM2G342515_P01, GRMZM5G879527_P04, GRMZM2G077531_P01, GRMZM2G451882_P01, GRMZM2G038066_P01, GRMZM2G417658_P01, GRMZM2G050186_P03, …
GO:0016773	phosphotransferase activity, alcohol group as acceptor	MOLECULAR_FUNCTION	0.0292553	62	219	1078	5272	GRMZM2G027115_P03, GRMZM2G306345_P05, GRMZM2G015073_P01, GRMZM2G306345_P01, GRMZM2G346263_P03, GRMZM2G085246_P02, GRMZM2G162529_P01, GRMZM2G019926_P03, GRMZM2G443985_P01, GRMZM6G828652_P01, GRMZM2G157034_P02, GRMZM2G098078_P02, GRMZM2G019267_P01, GRMZM2G007630_P01, GRMZM2G023715_P01, GRMZM2G132607_P01, GRMZM2G074015_P02, GRMZM2G127717_P01, GRMZM2G411668_P01, GRMZM2G068913_P01, GRMZM2G010349_P02, …
GO:0003677	DNA binding	MOLECULAR_FUNCTION	0.0160688	61	206	1079	5285	GRMZM2G018607_P01, GRMZM2G305582_P01, GRMZM2G085254_P01, GRMZM2G375984_P02, GRMZM2G469162_P01, GRMZM2G019446_P01, GRMZM2G051879_P05, GRMZM2G025095_P03, GRMZM2G097843_P01, GRMZM5G861064_P01, GRMZM2G087032_P01, GRMZM2G069009_P01, GRMZM2G169333_P07, GRMZM2G084928_P02, GRMZM5G834758_P03, GRMZM2G060540_P01, AC155434.2_FGP004, GRMZM2G342515_P01, GRMZM5G879527_P04, GRMZM2G001750_P01, GRMZM2G158097_P02, …
GO:0044085	cellular component biogenesis	BIOLOGICAL_PROCESS	0.0274283	60	389	1080	5102	GRMZM2G040247_P01, GRMZM2G099045_P01, GRMZM2G026980_P01, GRMZM2G157379_P01, GRMZM2G044247_P01, GRMZM2G051879_P05, GRMZM2G479000_P01, GRMZM5G839422_P01, GRMZM2G103430_P02, GRMZM2G025882_P01, GRMZM2G094224_P01, GRMZM2G122715_P02, GRMZM2G162529_P01, GRMZM2G111216_P01, GRMZM2G145595_P01, GRMZM2G157034_P02, GRMZM2G129208_P01, GRMZM2G028156_P01, GRMZM2G031496_P01, GRMZM2G412150_P01, GRMZM2G342515_P01, …
GO:0019693	ribose phosphate metabolic process	BIOLOGICAL_PROCESS	0.00775161	59	190	1081	5301	GRMZM2G145854_P01, GRMZM5G878308_P01, GRMZM2G104325_P01, GRMZM5G808402_P01, GRMZM2G029573_P01, GRMZM5G861064_P01, GRMZM2G162529_P01, GRMZM2G098290_P02, GRMZM2G443985_P01, GRMZM2G137648_P01, GRMZM2G064302_P01, GRMZM2G339699_P01, GRMZM2G009808_P01, GRMZM5G833389_P02, GRMZM2G079888_P01, GRMZM2G065083_P01, GRMZM2G067176_P01, GRMZM2G181151_P01, GRMZM2G178960_P01, GRMZM2G127717_P01, GRMZM2G068913_P01, …
GO:0006811	ion transport	BIOLOGICAL_PROCESS	0.0102259	59	192	1081	5299	GRMZM2G359038_P01, GRMZM2G104325_P01, GRMZM5G808402_P01, GRMZM2G174107_P01, GRMZM2G083173_P01, GRMZM2G060742_P04, GRMZM5G861064_P01, GRMZM2G055704_P01, GRMZM2G092780_P01, GRMZM2G094224_P01, GRMZM2G098290_P02, GRMZM2G096683_P01, GRMZM2G041050_P02, GRMZM2G085301_P01, GRMZM2G104730_P02, GRMZM2G057616_P01, GRMZM2G064473_P01, GRMZM2G069095_P01, GRMZM2G158097_P02, GRMZM2G315931_P01, GRMZM2G075502_P01, …
GO:0009259	ribonucleotide metabolic process	BIOLOGICAL_PROCESS	0.00182956	58	173	1082	5318	GRMZM2G145854_P01, GRMZM5G878308_P01, GRMZM2G104325_P01, GRMZM5G808402_P01, GRMZM2G029573_P01, GRMZM5G861064_P01, GRMZM2G162529_P01, GRMZM2G098290_P02, GRMZM2G443985_P01, GRMZM2G137648_P01, GRMZM2G064302_P01, GRMZM2G339699_P01, GRMZM2G009808_P01, GRMZM5G833389_P02, GRMZM2G079888_P01, GRMZM2G065083_P01, GRMZM2G067176_P01, GRMZM2G181151_P01, GRMZM2G127717_P01, GRMZM2G068913_P01, GRMZM2G176397_P01, …
GO:0016798	hydrolase activity, acting on glycosyl bonds	MOLECULAR_FUNCTION	5.90822e-07	58	122	1082	5369	GRMZM2G164676_P02, GRMZM2G026980_P01, GRMZM2G077541_P02, GRMZM2G097207_P01, GRMZM2G158043_P02, GRMZM2G150796_P01, GRMZM5G855776_P01, GRMZM2G009025_P01, GRMZM2G098397_P01, AC234091.1_FGP001, GRMZM2G058739_P01, GRMZM2G174249_P06, GRMZM2G428518_P01, GRMZM2G169333_P07, GRMZM2G137077_P01, GRMZM2G139300_P01, GRMZM2G138060_P01, GRMZM2G012758_P01, GRMZM2G308707_P01, GRMZM2G097277_P01, GRMZM2G147687_P03, …
GO:0072521	purine-containing compound metabolic process	BIOLOGICAL_PROCESS	0.00131487	56	162	1084	5329	GRMZM2G145854_P01, GRMZM5G878308_P01, GRMZM2G368902_P01, GRMZM2G104325_P01, GRMZM5G808402_P01, GRMZM5G861064_P01, GRMZM2G098290_P02, GRMZM2G443985_P01, GRMZM2G137648_P01, GRMZM2G064302_P01, GRMZM2G339699_P01, GRMZM2G009808_P01, GRMZM5G833389_P02, GRMZM2G079888_P01, GRMZM2G065083_P01, GRMZM2G067176_P01, GRMZM2G181151_P01, GRMZM2G127717_P01, GRMZM2G068913_P01, GRMZM2G176397_P01, GRMZM2G039251_P01, …
GO:0043603	cellular amide metabolic process	BIOLOGICAL_PROCESS	3.41114e-08	54	522	1086	4969	GRMZM2G022192_P01, GRMZM2G336908_P01, GRMZM2G166713_P01, GRMZM2G305115_P01, GRMZM2G054896_P01, GRMZM2G029573_P01, GRMZM2G165917_P03, GRMZM2G057535_P01, GRMZM2G111216_P01, GRMZM2G163471_P01, GRMZM2G091560_P01, GRMZM2G155974_P01, GRMZM2G129804_P01, GRMZM2G455085_P01, GRMZM2G145496_P01, GRMZM2G478664_P01, GRMZM2G474534_P02, GRMZM2G389233_P03, GRMZM2G172322_P01, GRMZM2G039251_P01, GRMZM2G137849_P01, …
GO:0004553	hydrolase activity, hydrolyzing O-glycosyl compounds	MOLECULAR_FUNCTION	3.37447e-07	54	106	1086	5385	GRMZM2G164676_P02, GRMZM2G026980_P01, GRMZM2G097207_P01, GRMZM2G158043_P02, GRMZM2G150796_P01, GRMZM5G855776_P01, GRMZM2G009025_P01, GRMZM2G098397_P01, AC234091.1_FGP001, GRMZM2G058739_P01, GRMZM2G174249_P06, GRMZM2G428518_P01, GRMZM2G137077_P01, GRMZM2G139300_P01, GRMZM2G138060_P01, GRMZM2G012758_P01, GRMZM2G308707_P01, GRMZM2G097277_P01, GRMZM2G147687_P03, GRMZM2G058685_P01, GRMZM2G038973_P01, …
GO:0006163	purine nucleotide metabolic process	BIOLOGICAL_PROCESS	0.000546747	53	145	1087	5346	GRMZM2G145854_P01, GRMZM5G878308_P01, GRMZM2G368902_P01, GRMZM2G104325_P01, GRMZM5G808402_P01, GRMZM5G861064_P01, GRMZM2G098290_P02, GRMZM2G443985_P01, GRMZM2G137648_P01, GRMZM2G064302_P01, GRMZM2G339699_P01, GRMZM2G009808_P01, GRMZM5G833389_P02, GRMZM2G079888_P01, GRMZM2G065083_P01, GRMZM2G067176_P01, GRMZM2G181151_P01, GRMZM2G127717_P01, GRMZM2G068913_P01, GRMZM2G176397_P01, GRMZM2G039251_P01, …
GO:0009150	purine ribonucleotide metabolic process	BIOLOGICAL_PROCESS	0.000663205	52	142	1088	5349	GRMZM2G145854_P01, GRMZM5G878308_P01, GRMZM2G104325_P01, GRMZM5G808402_P01, GRMZM5G861064_P01, GRMZM2G098290_P02, GRMZM2G443985_P01, GRMZM2G137648_P01, GRMZM2G064302_P01, GRMZM2G339699_P01, GRMZM2G009808_P01, GRMZM5G833389_P02, GRMZM2G079888_P01, GRMZM2G065083_P01, GRMZM2G067176_P01, GRMZM2G181151_P01, GRMZM2G127717_P01, GRMZM2G068913_P01, GRMZM2G176397_P01, GRMZM2G039251_P01, GRMZM2G121520_P01, …
GO:0044262	cellular carbohydrate metabolic process	BIOLOGICAL_PROCESS	0.0023453	52	151	1088	5340	GRMZM2G105791_P01, GRMZM2G026980_P01, GRMZM2G150796_P01, GRMZM2G136522_P01, GRMZM2G122715_P02, GRMZM2G112176_P01, GRMZM2G009025_P01, GRMZM2G127374_P01, GRMZM2G428518_P01, GRMZM2G044744_P01, GRMZM2G123277_P01, GRMZM2G138060_P01, GRMZM2G377761_P01, GRMZM2G008263_P02, GRMZM2G412611_P01, GRMZM2G007630_P01, GRMZM2G158097_P02, GRMZM2G132607_P01, GRMZM2G178826_P03, GRMZM2G178960_P01, GRMZM2G130085_P03, …
GO:0006468	protein phosphorylation	BIOLOGICAL_PROCESS	0.041069	52	180	1088	5311	GRMZM2G306345_P05, GRMZM2G015073_P01, GRMZM2G306345_P01, GRMZM2G346263_P03, GRMZM2G085246_P02, GRMZM2G162529_P01, GRMZM2G019926_P03, GRMZM2G157034_P02, GRMZM2G103544_P01, GRMZM2G098078_P02, GRMZM2G019267_P01, GRMZM2G001750_P01, GRMZM2G158097_P02, GRMZM2G023715_P01, GRMZM2G067176_P01, GRMZM2G411668_P01, GRMZM2G010349_P02, GRMZM2G137788_P01, GRMZM2G003096_P01, GRMZM2G080503_P01, GRMZM2G170035_P01, …
GO:0051188	cofactor biosynthetic process	BIOLOGICAL_PROCESS	0.017796	51	168	1089	5323	GRMZM5G862488_P03, GRMZM2G069708_P01, GRMZM2G025882_P01, GRMZM2G136522_P01, GRMZM2G111216_P01, GRMZM2G098290_P02, GRMZM2G443985_P01, GRMZM2G155974_P01, GRMZM2G064302_P01, GRMZM2G009808_P01, GRMZM2G377761_P01, GRMZM2G082998_P01, GRMZM2G129781_P01, GRMZM5G833389_P02, GRMZM2G065083_P01, GRMZM2G067176_P01, GRMZM2G142836_P01, GRMZM2G127717_P01, GRMZM2G068913_P01, GRMZM2G176397_P01, GRMZM2G109165_P01, …
GO:1901293	nucleoside phosphate biosynthetic process	BIOLOGICAL_PROCESS	0.0235643	51	171	1089	5320	GRMZM5G862488_P03, GRMZM2G368902_P01, GRMZM2G104325_P01, GRMZM5G808402_P01, GRMZM2G029573_P01, GRMZM5G861064_P01, GRMZM2G027043_P01, GRMZM2G162529_P01, GRMZM2G098290_P02, GRMZM2G443985_P01, GRMZM2G064302_P01, GRMZM2G339699_P01, GRMZM2G009808_P01, GRMZM5G833389_P02, GRMZM2G065083_P01, GRMZM2G142836_P01, GRMZM2G127717_P01, GRMZM2G068913_P01, GRMZM2G176397_P01, GRMZM2G039251_P01, AC234528.1_FGP005, …
GO:0009161	ribonucleoside monophosphate metabolic process	BIOLOGICAL_PROCESS	0.000747179	50	136	1090	5355	GRMZM2G145854_P01, GRMZM5G878308_P01, GRMZM2G104325_P01, GRMZM5G808402_P01, GRMZM2G029573_P01, GRMZM5G861064_P01, GRMZM2G162529_P01, GRMZM2G098290_P02, GRMZM2G443985_P01, GRMZM2G137648_P01, GRMZM2G064302_P01, GRMZM2G339699_P01, GRMZM2G009808_P01, GRMZM5G833389_P02, GRMZM2G079888_P01, GRMZM2G065083_P01, GRMZM2G181151_P01, GRMZM2G127717_P01, GRMZM2G068913_P01, GRMZM2G176397_P01, GRMZM2G121520_P01, …
GO:0009123	nucleoside monophosphate metabolic process	BIOLOGICAL_PROCESS	0.00111074	50	138	1090	5353	GRMZM2G145854_P01, GRMZM5G878308_P01, GRMZM2G104325_P01, GRMZM5G808402_P01, GRMZM2G029573_P01, GRMZM5G861064_P01, GRMZM2G162529_P01, GRMZM2G098290_P02, GRMZM2G443985_P01, GRMZM2G137648_P01, GRMZM2G064302_P01, GRMZM2G339699_P01, GRMZM2G009808_P01, GRMZM5G833389_P02, GRMZM2G079888_P01, GRMZM2G065083_P01, GRMZM2G181151_P01, GRMZM2G127717_P01, GRMZM2G068913_P01, GRMZM2G176397_P01, GRMZM2G121520_P01, …
GO:0009165	nucleotide biosynthetic process	BIOLOGICAL_PROCESS	0.0365109	50	171	1090	5320	GRMZM5G862488_P03, GRMZM2G368902_P01, GRMZM2G104325_P01, GRMZM5G808402_P01, GRMZM2G029573_P01, GRMZM5G861064_P01, GRMZM2G027043_P01, GRMZM2G162529_P01, GRMZM2G098290_P02, GRMZM2G443985_P01, GRMZM2G064302_P01, GRMZM2G339699_P01, GRMZM2G009808_P01, GRMZM5G833389_P02, GRMZM2G065083_P01, GRMZM2G142836_P01, GRMZM2G127717_P01, GRMZM2G068913_P01, GRMZM2G176397_P01, AC234528.1_FGP005, GRMZM2G121520_P01, …
GO:0071705	nitrogen compound transport	BIOLOGICAL_PROCESS	0.0410431	50	325	1090	5166	GRMZM2G167463_P01, GRMZM2G057402_P03, GRMZM2G359038_P01, GRMZM2G040247_P01, GRMZM2G117507_P01, GRMZM2G051879_P05, GRMZM5G839422_P01, GRMZM2G025123_P01, GRMZM2G162529_P01, GRMZM2G041050_P02, GRMZM5G892645_P02, GRMZM2G103544_P01, GRMZM2G082167_P01, GRMZM2G064473_P01, GRMZM2G001750_P01, GRMZM2G067176_P01, GRMZM2G042313_P01, GRMZM5G809546_P01, GRMZM2G080503_P01, GRMZM2G086258_P02, GRMZM2G089507_P01, …
GO:0006090	pyruvate metabolic process	BIOLOGICAL_PROCESS	0.000105216	49	119	1091	5372	GRMZM2G306345_P05, GRMZM2G306345_P01, GRMZM2G025882_P01, GRMZM2G136522_P01, GRMZM2G122715_P02, GRMZM2G098290_P02, GRMZM2G443985_P01, GRMZM2G064302_P01, GRMZM2G009808_P01, GRMZM2G377761_P01, GRMZM2G082998_P01, GRMZM5G833389_P02, GRMZM2G158097_P02, GRMZM2G065083_P01, GRMZM2G059252_P01, GRMZM2G127717_P01, GRMZM2G068913_P01, GRMZM2G089696_P01, GRMZM2G176397_P01, GRMZM2G109165_P01, GRMZM5G845611_P01, …
GO:0034220	ion transmembrane transport	BIOLOGICAL_PROCESS	0.00316667	48	140	1092	5351	GRMZM2G067789_P01, GRMZM2G104325_P01, GRMZM5G808402_P01, GRMZM2G174107_P01, GRMZM2G055025_P01, GRMZM2G021331_P01, GRMZM2G083173_P01, GRMZM2G060742_P04, GRMZM2G443728_P02, GRMZM5G861064_P01, GRMZM2G092780_P01, GRMZM2G081843_P01, GRMZM2G137985_P01, GRMZM2G001457_P02, GRMZM2G098290_P02, GRMZM2G096683_P01, GRMZM2G041050_P02, GRMZM2G085301_P01, GRMZM2G067853_P01, GRMZM2G383088_P01, GRMZM2G352695_P01, …
GO:0051641	cellular localization	BIOLOGICAL_PROCESS	0.008362	48	340	1092	5151	GRMZM2G167463_P01, GRMZM5G861997_P01, GRMZM2G057402_P03, GRMZM2G040247_P01, GRMZM2G018484_P01, GRMZM2G166646_P01, GRMZM2G001918_P01, GRMZM5G823017_P01, GRMZM2G076539_P01, GRMZM2G473463_P01, GRMZM2G051879_P05, GRMZM2G062738_P01, GRMZM2G165655_P01, GRMZM2G107205_P01, GRMZM2G092780_P01, GRMZM5G839422_P01, GRMZM2G488458_P01, GRMZM2G031360_P01, GRMZM2G162529_P01, GRMZM2G001457_P02, GRMZM2G037778_P01, …
GO:0006518	peptide metabolic process	BIOLOGICAL_PROCESS	3.63832e-08	46	469	1094	5022	GRMZM2G022192_P01, GRMZM2G336908_P01, GRMZM2G166713_P01, GRMZM2G305115_P01, GRMZM2G054896_P01, GRMZM2G377600_P01, GRMZM2G165655_P01, GRMZM2G165917_P03, GRMZM2G028313_P03, GRMZM2G057535_P01, GRMZM2G111216_P01, GRMZM2G163471_P01, GRMZM2G091560_P01, GRMZM2G037778_P01, GRMZM2G096424_P01, GRMZM2G155974_P01, GRMZM2G129804_P01, GRMZM2G153162_P01, GRMZM2G106061_P01, GRMZM5G821988_P02, GRMZM2G397247_P03, …
GO:0016999	antibiotic metabolic process	BIOLOGICAL_PROCESS	4.28237e-07	46	84	1094	5407	GRMZM5G828229_P02, GRMZM2G157269_P01, GRMZM2G085967_P03, GRMZM2G150893_P01, GRMZM2G165655_P01, GRMZM6G514393_P01, GRMZM2G126261_P01, GRMZM5G839422_P01, GRMZM5G876898_P01, GRMZM2G415359_P02, GRMZM2G136522_P01, GRMZM2G090568_P01, GRMZM2G162529_P01, GRMZM2G006144_P01, GRMZM2G037778_P01, GRMZM2G144648_P01, GRMZM2G151169_P01, GRMZM2G394500_P01, GRMZM2G064799_P01, GRMZM5G824600_P03, GRMZM2G103544_P01, …
GO:0016052	carbohydrate catabolic process	BIOLOGICAL_PROCESS	0.000149728	46	111	1094	5380	GRMZM2G136803_P02, GRMZM2G167637_P01, GRMZM2G051806_P01, GRMZM2G166646_P01, GRMZM2G051879_P05, GRMZM2G150796_P01, GRMZM2G003565_P03, GRMZM2G025854_P04, GRMZM2G467069_P03, GRMZM5G852968_P03, GRMZM2G085577_P01, GRMZM2G009025_P01, GRMZM2G098290_P02, GRMZM2G025182_P01, AC234091.1_FGP001, GRMZM2G443985_P01, GRMZM2G127374_P01, GRMZM2G004382_P01, GRMZM2G004534_P01, GRMZM2G314094_P01, GRMZM2G033219_P01, …
GO:0009126	purine nucleoside monophosphate metabolic process	BIOLOGICAL_PROCESS	0.000551347	46	120	1094	5371	GRMZM2G145854_P01, GRMZM5G878308_P01, GRMZM2G104325_P01, GRMZM5G808402_P01, GRMZM2G051806_P01, GRMZM2G166646_P01, GRMZM2G021331_P01, GRMZM5G861064_P01, GRMZM2G467069_P03, GRMZM5G852968_P03, GRMZM2G098290_P02, GRMZM2G443985_P01, GRMZM2G004382_P01, GRMZM5G800096_P01, GRMZM2G137648_P01, GRMZM2G004534_P01, GRMZM2G314094_P01, GRMZM2G064799_P01, GRMZM2G064302_P01, GRMZM2G339699_P01, GRMZM2G009808_P01, …
GO:0009167	purine ribonucleoside monophosphate metabolic process	BIOLOGICAL_PROCESS	0.000551347	46	120	1094	5371	GRMZM2G145854_P01, GRMZM5G878308_P01, GRMZM2G104325_P01, GRMZM5G808402_P01, GRMZM2G051806_P01, GRMZM2G166646_P01, GRMZM2G021331_P01, GRMZM5G861064_P01, GRMZM2G467069_P03, GRMZM5G852968_P03, GRMZM2G098290_P02, GRMZM2G443985_P01, GRMZM2G004382_P01, GRMZM5G800096_P01, GRMZM2G137648_P01, GRMZM2G004534_P01, GRMZM2G314094_P01, GRMZM2G064799_P01, GRMZM2G064302_P01, GRMZM2G339699_P01, GRMZM2G009808_P01, …
GO:0009260	ribonucleotide biosynthetic process	BIOLOGICAL_PROCESS	0.0107888	46	143	1094	5348	GRMZM2G104325_P01, GRMZM2G157269_P01, GRMZM5G808402_P01, GRMZM2G051806_P01, GRMZM2G166646_P01, GRMZM2G147450_P01, GRMZM2G021331_P01, GRMZM2G029573_P01, GRMZM5G861064_P01, GRMZM2G467069_P03, GRMZM5G852968_P03, GRMZM2G162529_P01, GRMZM2G098290_P02, GRMZM2G443985_P01, GRMZM2G463280_P02, GRMZM2G004382_P01, GRMZM2G004534_P01, GRMZM2G314094_P01, GRMZM2G064302_P01, GRMZM2G339699_P01, GRMZM2G009808_P01, …
GO:0046390	ribose phosphate biosynthetic process	BIOLOGICAL_PROCESS	0.0107888	46	143	1094	5348	GRMZM2G104325_P01, GRMZM2G157269_P01, GRMZM5G808402_P01, GRMZM2G051806_P01, GRMZM2G166646_P01, GRMZM2G147450_P01, GRMZM2G021331_P01, GRMZM2G029573_P01, GRMZM5G861064_P01, GRMZM2G467069_P03, GRMZM5G852968_P03, GRMZM2G162529_P01, GRMZM2G098290_P02, GRMZM2G443985_P01, GRMZM2G463280_P02, GRMZM2G004382_P01, GRMZM2G004534_P01, GRMZM2G314094_P01, GRMZM2G064302_P01, GRMZM2G339699_P01, GRMZM2G009808_P01, …
GO:0022804	active transmembrane transporter activity	MOLECULAR_FUNCTION	9.171e-05	46	109	1094	5382	GRMZM2G018607_P01, GRMZM2G167463_P01, GRMZM2G067789_P01, GRMZM2G359038_P01, GRMZM2G104325_P01, GRMZM5G808402_P01, GRMZM2G174107_P01, GRMZM2G001918_P01, GRMZM2G021331_P01, GRMZM2G083173_P01, GRMZM2G092780_P01, GRMZM2G025123_P01, GRMZM2G142249_P01, GRMZM2G034302_P01, GRMZM2G096683_P01, GRMZM2G041050_P02, GRMZM2G085301_P01, GRMZM2G067853_P01, GRMZM2G352695_P01, GRMZM2G104730_P02, GRMZM2G002391_P02, …
GO:0033036	macromolecule localization	BIOLOGICAL_PROCESS	0.00180611	45	344	1095	5147	GRMZM2G167463_P01, GRMZM5G861997_P01, GRMZM2G057402_P03, GRMZM2G040247_P01, GRMZM2G117507_P01, GRMZM2G018484_P01, GRMZM2G166646_P01, GRMZM2G001918_P01, GRMZM5G823017_P01, GRMZM2G076539_P01, GRMZM2G473463_P01, GRMZM2G051879_P05, GRMZM2G165655_P01, GRMZM2G107205_P01, GRMZM2G092780_P01, GRMZM5G839422_P01, GRMZM2G025123_P01, GRMZM2G142249_P01, GRMZM5G852968_P03, GRMZM2G031360_P01, GRMZM2G162529_P01, …
GO:0051649	establishment of localization in cell	BIOLOGICAL_PROCESS	0.0396683	45	299	1095	5192	GRMZM2G167463_P01, GRMZM5G861997_P01, GRMZM2G057402_P03, GRMZM2G040247_P01, GRMZM2G018484_P01, GRMZM2G166646_P01, GRMZM2G001918_P01, GRMZM5G823017_P01, GRMZM2G076539_P01, GRMZM2G051879_P05, GRMZM2G062738_P01, GRMZM2G165655_P01, GRMZM2G107205_P01, GRMZM5G839422_P01, GRMZM2G488458_P01, GRMZM2G031360_P01, GRMZM2G162529_P01, GRMZM2G001457_P02, GRMZM2G037778_P01, GRMZM2G044337_P01, GRMZM2G059015_P01, …
GO:0019684	photosynthesis, light reaction	BIOLOGICAL_PROCESS	2.03161e-07	44	75	1096	5416	GRMZM2G328908_P01, GRMZM2G087598_P02, GRMZM2G044247_P01, GRMZM2G165655_P01, GRMZM2G479000_P01, GRMZM5G839422_P01, GRMZM2G025882_P01, GRMZM2G094224_P01, GRMZM2G118646_P01, GRMZM2G488458_P01, GRMZM2G122715_P02, GRMZM2G162529_P01, GRMZM2G111216_P01, GRMZM5G838196_P02, GRMZM5G874448_P01, GRMZM2G126361_P02, GRMZM2G011373_P01, GRMZM5G866223_P01, GRMZM2G002165_P01, GRMZM2G315931_P01, GRMZM2G157156_P02, …
GO:0043604	amide biosynthetic process	BIOLOGICAL_PROCESS	7.81809e-08	44	448	1096	5043	GRMZM2G022192_P01, GRMZM2G336908_P01, GRMZM2G157269_P01, GRMZM2G147450_P01, GRMZM2G166713_P01, GRMZM2G305115_P01, GRMZM2G054896_P01, GRMZM2G377600_P01, GRMZM2G165655_P01, GRMZM2G029573_P01, GRMZM2G165917_P03, GRMZM2G028313_P03, GRMZM2G057535_P01, GRMZM2G111216_P01, GRMZM2G163471_P01, GRMZM2G091560_P01, GRMZM2G037778_P01, GRMZM2G096424_P01, GRMZM2G155974_P01, GRMZM2G129804_P01, GRMZM2G153162_P01, …
GO:0006812	cation transport	BIOLOGICAL_PROCESS	0.0203295	43	136	1097	5355	GRMZM2G067789_P01, GRMZM2G104325_P01, GRMZM5G808402_P01, GRMZM2G021331_P01, GRMZM2G083173_P01, GRMZM2G443728_P02, GRMZM5G861064_P01, GRMZM2G055704_P01, GRMZM2G094224_P01, GRMZM5G852968_P03, GRMZM2G001457_P02, GRMZM2G098290_P02, GRMZM2G096683_P01, GRMZM2G041050_P02, GRMZM2G085301_P01, GRMZM2G067853_P01, GRMZM2G383088_P01, GRMZM2G352695_P01, GRMZM2G104730_P02, GRMZM5G836886_P01, GRMZM5G859195_P01, …
GO:0009605	response to external stimulus	BIOLOGICAL_PROCESS	0.0289454	43	141	1097	5350	GRMZM2G027115_P03, GRMZM2G040247_P01, GRMZM2G044247_P01, GRMZM2G346455_P06, GRMZM2G165655_P01, GRMZM2G003565_P03, GRMZM2G025854_P04, GRMZM2G162529_P01, GRMZM2G001457_P02, GRMZM2G127361_P01, GRMZM2G339563_P01, GRMZM2G153162_P01, GRMZM2G103544_P01, GRMZM2G048435_P02, GRMZM2G032351_P01, GRMZM2G384730_P01, GRMZM5G821988_P02, GRMZM2G033478_P02, GRMZM2G377761_P01, GRMZM2G001750_P01, GRMZM2G171961_P01, …
GO:0009141	nucleoside triphosphate metabolic process	BIOLOGICAL_PROCESS	0.00150744	42	111	1098	5380	GRMZM2G145854_P01, GRMZM5G878308_P01, GRMZM2G104325_P01, GRMZM5G808402_P01, GRMZM2G051806_P01, GRMZM2G166646_P01, GRMZM2G021331_P01, GRMZM5G861064_P01, GRMZM2G467069_P03, GRMZM5G852968_P03, GRMZM2G098290_P02, GRMZM2G443985_P01, GRMZM2G004382_P01, GRMZM5G800096_P01, GRMZM2G137648_P01, GRMZM2G004534_P01, GRMZM2G314094_P01, GRMZM2G064799_P01, GRMZM2G064302_P01, GRMZM2G009808_P01, GRMZM2G080375_P01, …
GO:0009156	ribonucleoside monophosphate biosynthetic process	BIOLOGICAL_PROCESS	0.00280743	42	117	1098	5374	GRMZM2G104325_P01, GRMZM5G808402_P01, GRMZM2G051806_P01, GRMZM2G166646_P01, GRMZM2G147450_P01, GRMZM2G021331_P01, GRMZM2G029573_P01, GRMZM5G861064_P01, GRMZM2G467069_P03, GRMZM5G852968_P03, GRMZM2G162529_P01, GRMZM2G098290_P02, GRMZM2G443985_P01, GRMZM2G463280_P02, GRMZM2G004382_P01, GRMZM2G004534_P01, GRMZM2G314094_P01, GRMZM2G064302_P01, GRMZM2G339699_P01, GRMZM2G009808_P01, GRMZM2G080375_P01, …
GO:0009124	nucleoside monophosphate biosynthetic process	BIOLOGICAL_PROCESS	0.00406977	42	119	1098	5372	GRMZM2G104325_P01, GRMZM5G808402_P01, GRMZM2G051806_P01, GRMZM2G166646_P01, GRMZM2G147450_P01, GRMZM2G021331_P01, GRMZM2G029573_P01, GRMZM5G861064_P01, GRMZM2G467069_P03, GRMZM5G852968_P03, GRMZM2G162529_P01, GRMZM2G098290_P02, GRMZM2G443985_P01, GRMZM2G463280_P02, GRMZM2G004382_P01, GRMZM2G004534_P01, GRMZM2G314094_P01, GRMZM2G064302_P01, GRMZM2G339699_P01, GRMZM2G009808_P01, GRMZM2G080375_P01, …
GO:0008104	protein localization	BIOLOGICAL_PROCESS	0.00477964	42	313	1098	5178	GRMZM2G167463_P01, GRMZM5G861997_P01, GRMZM2G057402_P03, GRMZM2G040247_P01, GRMZM2G117507_P01, GRMZM2G018484_P01, GRMZM2G166646_P01, GRMZM2G001918_P01, GRMZM5G823017_P01, GRMZM2G076539_P01, GRMZM2G473463_P01, GRMZM2G051879_P05, GRMZM2G165655_P01, GRMZM2G107205_P01, GRMZM5G839422_P01, GRMZM2G025123_P01, GRMZM5G852968_P03, GRMZM2G031360_P01, GRMZM2G162529_P01, GRMZM2G059015_P01, GRMZM5G892645_P02, …
GO:0022900	electron transport chain	BIOLOGICAL_PROCESS	7.24495e-07	41	71	1099	5420	GRMZM2G328908_P01, GRMZM2G320307_P02, GRMZM2G145854_P01, GRMZM5G878308_P01, GRMZM2G087598_P02, GRMZM2G044247_P01, GRMZM2G086763_P01, GRMZM2G139193_P01, GRMZM2G025882_P01, GRMZM2G059191_P01, GRMZM2G122715_P02, GRMZM2G162529_P01, GRMZM5G838196_P02, GRMZM2G335657_P01, GRMZM2G126361_P02, GRMZM5G800096_P01, GRMZM2G137648_P01, GRMZM2G463640_P01, GRMZM2G145595_P01, GRMZM2G064799_P01, GRMZM2G011373_P01, …
GO:0009205	purine ribonucleoside triphosphate metabolic process	BIOLOGICAL_PROCESS	0.0012025	41	106	1099	5385	GRMZM2G145854_P01, GRMZM5G878308_P01, GRMZM2G104325_P01, GRMZM5G808402_P01, GRMZM2G051806_P01, GRMZM2G166646_P01, GRMZM2G021331_P01, GRMZM5G861064_P01, GRMZM2G467069_P03, GRMZM5G852968_P03, GRMZM2G098290_P02, GRMZM2G443985_P01, GRMZM2G004382_P01, GRMZM5G800096_P01, GRMZM2G137648_P01, GRMZM2G004534_P01, GRMZM2G314094_P01, GRMZM2G064799_P01, GRMZM2G064302_P01, GRMZM2G009808_P01, GRMZM2G080375_P01, …
GO:0009144	purine nucleoside triphosphate metabolic process	BIOLOGICAL_PROCESS	0.0012025	41	106	1099	5385	GRMZM2G145854_P01, GRMZM5G878308_P01, GRMZM2G104325_P01, GRMZM5G808402_P01, GRMZM2G051806_P01, GRMZM2G166646_P01, GRMZM2G021331_P01, GRMZM5G861064_P01, GRMZM2G467069_P03, GRMZM5G852968_P03, GRMZM2G098290_P02, GRMZM2G443985_P01, GRMZM2G004382_P01, GRMZM5G800096_P01, GRMZM2G137648_P01, GRMZM2G004534_P01, GRMZM2G314094_P01, GRMZM2G064799_P01, GRMZM2G064302_P01, GRMZM2G009808_P01, GRMZM2G080375_P01, …
GO:0016311	dephosphorylation	BIOLOGICAL_PROCESS	0.00198151	41	109	1099	5382	GRMZM2G166035_P01, GRMZM2G018441_P01, AC211394.4_FGP004, GRMZM2G010065_P01, GRMZM2G165655_P01, GRMZM5G829894_P01, GRMZM2G111164_P04, GRMZM2G056572_P03, GRMZM5G839422_P01, GRMZM2G025882_P01, GRMZM2G051697_P01, GRMZM2G488458_P01, GRMZM2G162529_P01, GRMZM2G127374_P01, GRMZM2G045404_P01, GRMZM2G071087_P01, GRMZM2G329909_P01, GRMZM2G322953_P05, GRMZM5G836250_P03, GRMZM2G001750_P01, GRMZM2G011520_P01, …
GO:0009199	ribonucleoside triphosphate metabolic process	BIOLOGICAL_PROCESS	0.0020633	41	110	1099	5381	GRMZM2G145854_P01, GRMZM5G878308_P01, GRMZM2G104325_P01, GRMZM5G808402_P01, GRMZM2G051806_P01, GRMZM2G166646_P01, GRMZM2G021331_P01, GRMZM5G861064_P01, GRMZM2G467069_P03, GRMZM5G852968_P03, GRMZM2G098290_P02, GRMZM2G443985_P01, GRMZM2G004382_P01, GRMZM5G800096_P01, GRMZM2G137648_P01, GRMZM2G004534_P01, GRMZM2G314094_P01, GRMZM2G064799_P01, GRMZM2G064302_P01, GRMZM2G009808_P01, GRMZM2G080375_P01, …
GO:0006164	purine nucleotide biosynthetic process	BIOLOGICAL_PROCESS	0.00327122	41	113	1099	5378	GRMZM2G368902_P01, GRMZM2G104325_P01, GRMZM2G157269_P01, GRMZM5G808402_P01, GRMZM2G051806_P01, GRMZM2G166646_P01, GRMZM2G021331_P01, GRMZM5G861064_P01, GRMZM2G467069_P03, GRMZM5G852968_P03, GRMZM2G098290_P02, GRMZM2G443985_P01, GRMZM2G004382_P01, GRMZM2G004534_P01, GRMZM2G314094_P01, GRMZM2G064302_P01, GRMZM2G339699_P01, GRMZM2G009808_P01, GRMZM2G080375_P01, GRMZM2G047028_P01, GRMZM6G477257_P01, …
GO:0072522	purine-containing compound biosynthetic process	BIOLOGICAL_PROCESS	0.00505406	41	116	1099	5375	GRMZM2G368902_P01, GRMZM2G104325_P01, GRMZM2G157269_P01, GRMZM5G808402_P01, GRMZM2G051806_P01, GRMZM2G166646_P01, GRMZM2G021331_P01, GRMZM5G861064_P01, GRMZM2G467069_P03, GRMZM5G852968_P03, GRMZM2G098290_P02, GRMZM2G443985_P01, GRMZM2G004382_P01, GRMZM2G004534_P01, GRMZM2G314094_P01, GRMZM2G064302_P01, GRMZM2G339699_P01, GRMZM2G009808_P01, GRMZM2G080375_P01, GRMZM2G047028_P01, GRMZM6G477257_P01, …
GO:0042886	amide transport	BIOLOGICAL_PROCESS	0.007955	41	301	1099	5190	GRMZM2G167463_P01, GRMZM5G861997_P01, GRMZM2G057402_P03, GRMZM2G040247_P01, GRMZM2G117507_P01, GRMZM2G018484_P01, GRMZM2G166646_P01, GRMZM2G001918_P01, GRMZM5G823017_P01, GRMZM2G076539_P01, GRMZM2G473463_P01, GRMZM2G051879_P05, GRMZM2G165655_P01, GRMZM2G107205_P01, GRMZM5G839422_P01, GRMZM2G025123_P01, GRMZM2G031360_P01, GRMZM2G162529_P01, GRMZM2G059015_P01, GRMZM5G892645_P02, GRMZM2G103544_P01, …
GO:0015833	peptide transport	BIOLOGICAL_PROCESS	0.007955	41	301	1099	5190	GRMZM2G167463_P01, GRMZM5G861997_P01, GRMZM2G057402_P03, GRMZM2G040247_P01, GRMZM2G117507_P01, GRMZM2G018484_P01, GRMZM2G166646_P01, GRMZM2G001918_P01, GRMZM5G823017_P01, GRMZM2G076539_P01, GRMZM2G473463_P01, GRMZM2G051879_P05, GRMZM2G165655_P01, GRMZM2G107205_P01, GRMZM5G839422_P01, GRMZM2G025123_P01, GRMZM2G031360_P01, GRMZM2G162529_P01, GRMZM2G059015_P01, GRMZM5G892645_P02, GRMZM2G103544_P01, …
GO:0004175	endopeptidase activity	MOLECULAR_FUNCTION	0.0172432	41	128	1099	5363	GRMZM2G087598_P02, GRMZM2G179941_P01, GRMZM2G166646_P01, GRMZM2G156145_P01, GRMZM2G123029_P03, GRMZM2G047319_P01, GRMZM2G077233_P03, GRMZM2G130053_P01, GRMZM2G348873_P01, GRMZM2G015238_P01, GRMZM2G118646_P01, GRMZM2G071582_P02, GRMZM2G133029_P01, GRMZM2G126361_P02, GRMZM2G163749_P01, GRMZM2G097286_P01, GRMZM2G102000_P01, GRMZM2G006377_P01, GRMZM2G065757_P01, GRMZM2G076417_P01, GRMZM2G157156_P02, …
GO:0043043	peptide biosynthetic process	BIOLOGICAL_PROCESS	2.69553e-07	40	411	1100	5080	GRMZM2G022192_P01, GRMZM2G336908_P01, GRMZM2G166713_P01, GRMZM2G305115_P01, GRMZM2G054896_P01, GRMZM2G377600_P01, GRMZM2G165655_P01, GRMZM2G165917_P03, GRMZM2G028313_P03, GRMZM2G057535_P01, GRMZM2G111216_P01, GRMZM2G163471_P01, GRMZM2G091560_P01, GRMZM2G037778_P01, GRMZM2G096424_P01, GRMZM2G155974_P01, GRMZM2G129804_P01, GRMZM2G153162_P01, GRMZM2G106061_P01, GRMZM5G821988_P02, GRMZM2G397247_P03, …
GO:0009152	purine ribonucleotide biosynthetic process	BIOLOGICAL_PROCESS	0.00440593	40	112	1100	5379	GRMZM2G104325_P01, GRMZM2G157269_P01, GRMZM5G808402_P01, GRMZM2G051806_P01, GRMZM2G166646_P01, GRMZM2G021331_P01, GRMZM5G861064_P01, GRMZM2G467069_P03, GRMZM5G852968_P03, GRMZM2G098290_P02, GRMZM2G443985_P01, GRMZM2G004382_P01, GRMZM2G004534_P01, GRMZM2G314094_P01, GRMZM2G064302_P01, GRMZM2G339699_P01, GRMZM2G009808_P01, GRMZM2G080375_P01, GRMZM2G047028_P01, GRMZM6G477257_P01, GRMZM5G833389_P02, …
GO:0045184	establishment of protein localization	BIOLOGICAL_PROCESS	0.00617674	40	300	1100	5191	GRMZM2G167463_P01, GRMZM5G861997_P01, GRMZM2G057402_P03, GRMZM2G040247_P01, GRMZM2G117507_P01, GRMZM2G018484_P01, GRMZM2G166646_P01, GRMZM2G001918_P01, GRMZM5G823017_P01, GRMZM2G076539_P01, GRMZM2G473463_P01, GRMZM2G051879_P05, GRMZM2G165655_P01, GRMZM2G107205_P01, GRMZM5G839422_P01, GRMZM2G025123_P01, GRMZM2G031360_P01, GRMZM2G162529_P01, GRMZM2G059015_P01, GRMZM5G892645_P02, GRMZM2G103544_P01, …
GO:0015031	protein transport	BIOLOGICAL_PROCESS	0.00901181	40	293	1100	5198	GRMZM2G167463_P01, GRMZM5G861997_P01, GRMZM2G057402_P03, GRMZM2G040247_P01, GRMZM2G117507_P01, GRMZM2G018484_P01, GRMZM2G166646_P01, GRMZM2G001918_P01, GRMZM5G823017_P01, GRMZM2G076539_P01, GRMZM2G473463_P01, GRMZM2G051879_P05, GRMZM2G165655_P01, GRMZM2G107205_P01, GRMZM5G839422_P01, GRMZM2G025123_P01, GRMZM2G031360_P01, GRMZM2G162529_P01, GRMZM2G059015_P01, GRMZM5G892645_P02, GRMZM2G103544_P01, …
GO:0006412	translation	BIOLOGICAL_PROCESS	1.69875e-07	39	408	1101	5083	GRMZM2G022192_P01, GRMZM2G336908_P01, GRMZM2G166713_P01, GRMZM2G305115_P01, GRMZM2G054896_P01, GRMZM2G377600_P01, GRMZM2G165655_P01, GRMZM2G165917_P03, GRMZM2G028313_P03, GRMZM2G057535_P01, GRMZM2G111216_P01, GRMZM2G163471_P01, GRMZM2G091560_P01, GRMZM2G037778_P01, GRMZM2G096424_P01, GRMZM2G129804_P01, GRMZM2G153162_P01, GRMZM2G106061_P01, GRMZM5G821988_P02, GRMZM2G397247_P03, GRMZM2G139614_P01, …
GO:0046034	ATP metabolic process	BIOLOGICAL_PROCESS	0.00140499	39	101	1101	5390	GRMZM2G145854_P01, GRMZM5G878308_P01, GRMZM2G104325_P01, GRMZM5G808402_P01, GRMZM2G051806_P01, GRMZM2G166646_P01, GRMZM2G021331_P01, GRMZM5G861064_P01, GRMZM2G467069_P03, GRMZM5G852968_P03, GRMZM2G098290_P02, GRMZM2G443985_P01, GRMZM2G004382_P01, GRMZM5G800096_P01, GRMZM2G137648_P01, GRMZM2G004534_P01, GRMZM2G314094_P01, GRMZM2G064799_P01, GRMZM2G064302_P01, GRMZM2G009808_P01, GRMZM2G080375_P01, …
GO:0016051	carbohydrate biosynthetic process	BIOLOGICAL_PROCESS	0.0358681	39	126	1101	5365	GRMZM2G122231_P01, GRMZM2G136803_P02, GRMZM2G105791_P01, GRMZM2G129451_P02, GRMZM2G025854_P04, GRMZM5G852968_P03, GRMZM2G136522_P01, GRMZM2G122715_P02, GRMZM2G014558_P01, GRMZM2G162529_P01, GRMZM2G004382_P01, GRMZM2G026969_P01, GRMZM2G044744_P01, GRMZM2G123277_P01, GRMZM2G448344_P01, GRMZM2G001696_P01, GRMZM2G337113_P02, GRMZM2G008263_P02, GRMZM6G477257_P01, GRMZM2G118462_P01, GRMZM2G158097_P02, …
GO:0015075	ion transmembrane transporter activity	MOLECULAR_FUNCTION	0.00592779	39	111	1101	5380	GRMZM2G067789_P01, GRMZM2G359038_P01, GRMZM2G104325_P01, GRMZM5G808402_P01, GRMZM2G174107_P01, GRMZM2G055025_P01, GRMZM2G021331_P01, GRMZM2G083173_P01, GRMZM2G443728_P02, GRMZM5G861064_P01, GRMZM2G092780_P01, GRMZM2G137985_P01, GRMZM2G034302_P01, GRMZM2G096683_P01, GRMZM2G041050_P02, GRMZM2G085301_P01, GRMZM2G067853_P01, GRMZM2G383088_P01, GRMZM2G352695_P01, GRMZM2G060977_P02, GRMZM2G104730_P02, …
GO:0015318	inorganic molecular entity transmembrane transporter activity	MOLECULAR_FUNCTION	0.0126887	39	116	1101	5375	GRMZM2G067789_P01, GRMZM2G104325_P01, GRMZM5G808402_P01, GRMZM2G174107_P01, GRMZM2G055025_P01, GRMZM2G021331_P01, GRMZM2G083173_P01, GRMZM2G443728_P02, GRMZM5G861064_P01, GRMZM2G092780_P01, GRMZM2G081843_P01, GRMZM2G137985_P01, GRMZM2G034302_P01, GRMZM2G096683_P01, GRMZM2G041050_P02, GRMZM2G085301_P01, GRMZM2G067853_P01, GRMZM2G383088_P01, GRMZM2G352695_P01, GRMZM2G060977_P02, GRMZM2G104730_P02, …
GO:0009127	purine nucleoside monophosphate biosynthetic process	BIOLOGICAL_PROCESS	0.00286955	38	101	1102	5390	GRMZM2G104325_P01, GRMZM5G808402_P01, GRMZM2G051806_P01, GRMZM2G166646_P01, GRMZM2G021331_P01, GRMZM5G861064_P01, GRMZM2G467069_P03, GRMZM5G852968_P03, GRMZM2G098290_P02, GRMZM2G443985_P01, GRMZM2G004382_P01, GRMZM2G004534_P01, GRMZM2G314094_P01, GRMZM2G064302_P01, GRMZM2G339699_P01, GRMZM2G009808_P01, GRMZM2G080375_P01, GRMZM2G047028_P01, GRMZM6G477257_P01, GRMZM5G833389_P02, GRMZM2G119852_P01, …
GO:0009168	purine ribonucleoside monophosphate biosynthetic process	BIOLOGICAL_PROCESS	0.00286955	38	101	1102	5390	GRMZM2G104325_P01, GRMZM5G808402_P01, GRMZM2G051806_P01, GRMZM2G166646_P01, GRMZM2G021331_P01, GRMZM5G861064_P01, GRMZM2G467069_P03, GRMZM5G852968_P03, GRMZM2G098290_P02, GRMZM2G443985_P01, GRMZM2G004382_P01, GRMZM2G004534_P01, GRMZM2G314094_P01, GRMZM2G064302_P01, GRMZM2G339699_P01, GRMZM2G009808_P01, GRMZM2G080375_P01, GRMZM2G047028_P01, GRMZM6G477257_P01, GRMZM5G833389_P02, GRMZM2G119852_P01, …
GO:0006979	response to oxidative stress	BIOLOGICAL_PROCESS	0.00459943	38	104	1102	5387	GRMZM2G577677_P01, GRMZM2G145854_P01, GRMZM2G085967_P03, GRMZM2G150893_P01, GRMZM2G069708_P01, GRMZM2G009785_P01, GRMZM2G023387_P01, GRMZM6G514393_P01, GRMZM2G126261_P01, GRMZM2G047968_P03, GRMZM2G136522_P01, GRMZM2G090568_P01, GRMZM2G073743_P03, GRMZM2G144648_P01, GRMZM2G394500_P01, GRMZM2G048435_P02, GRMZM2G009808_P01, GRMZM2G047456_P04, GRMZM2G365774_P01, GRMZM2G450233_P01, GRMZM2G002165_P01, …
GO:0009657	plastid organization	BIOLOGICAL_PROCESS	0.00497599	38	106	1102	5385	GRMZM2G087598_P02, GRMZM2G062738_P01, GRMZM2G165655_P01, GRMZM2G171871_P01, GRMZM5G839422_P01, GRMZM5G876898_P01, GRMZM5G852968_P03, GRMZM2G136522_P01, GRMZM2G488458_P01, GRMZM2G162529_P01, GRMZM2G001457_P02, GRMZM2G111216_P01, GRMZM2G037778_P01, GRMZM2G339563_P01, GRMZM2G126361_P02, GRMZM2G077531_P01, GRMZM2G002165_P01, GRMZM2G039841_P01, GRMZM2G017419_P01, GRMZM2G130064_P01, GRMZM2G319109_P01, …
GO:0046907	intracellular transport	BIOLOGICAL_PROCESS	0.0241898	38	268	1102	5223	GRMZM2G167463_P01, GRMZM5G861997_P01, GRMZM2G057402_P03, GRMZM2G040247_P01, GRMZM2G018484_P01, GRMZM2G166646_P01, GRMZM2G001918_P01, GRMZM5G823017_P01, GRMZM2G076539_P01, GRMZM2G051879_P05, GRMZM2G165655_P01, GRMZM2G107205_P01, GRMZM5G839422_P01, GRMZM2G031360_P01, GRMZM2G162529_P01, GRMZM2G044337_P01, GRMZM2G059015_P01, GRMZM5G892645_P02, GRMZM2G424582_P01, GRMZM2G103544_P01, GRMZM2G384730_P01, …
GO:0072593	reactive oxygen species metabolic process	BIOLOGICAL_PROCESS	1.00279e-06	37	61	1103	5430	GRMZM5G828229_P02, GRMZM2G085967_P03, GRMZM2G150893_P01, GRMZM2G165655_P01, GRMZM6G514393_P01, GRMZM2G126261_P01, GRMZM5G839422_P01, GRMZM5G876898_P01, GRMZM2G136522_P01, GRMZM2G090568_P01, GRMZM2G162529_P01, GRMZM2G006144_P01, GRMZM2G037778_P01, GRMZM2G144648_P01, GRMZM2G394500_P01, GRMZM2G103544_P01, GRMZM2G047456_P04, GRMZM2G129781_P01, GRMZM2G001750_P01, GRMZM2G365774_P01, GRMZM2G450233_P01, …
GO:0070727	cellular macromolecule localization	BIOLOGICAL_PROCESS	0.019104	37	266	1103	5225	GRMZM2G167463_P01, GRMZM5G861997_P01, GRMZM2G057402_P03, GRMZM2G040247_P01, GRMZM2G018484_P01, GRMZM2G166646_P01, GRMZM2G001918_P01, GRMZM5G823017_P01, GRMZM2G076539_P01, GRMZM2G473463_P01, GRMZM2G051879_P05, GRMZM2G165655_P01, GRMZM2G107205_P01, GRMZM2G092780_P01, GRMZM5G839422_P01, GRMZM2G031360_P01, GRMZM2G162529_P01, GRMZM2G059015_P01, GRMZM5G892645_P02, GRMZM2G103544_P01, GRMZM2G384730_P01, …
GO:0006720	isoprenoid metabolic process	BIOLOGICAL_PROCESS	0.0019017	36	92	1104	5399	GRMZM2G009785_P01, GRMZM2G165655_P01, GRMZM2G092780_P01, GRMZM5G876898_P01, GRMZM2G025882_P01, GRMZM2G025123_P01, GRMZM5G852968_P03, GRMZM2G136522_P01, GRMZM2G122715_P02, AC234201.1_FGP003, GRMZM2G127361_P01, GRMZM2G006144_P01, GRMZM2G037778_P01, GRMZM2G136344_P02, GRMZM5G859195_P01, GRMZM2G377761_P01, GRMZM2G082998_P01, GRMZM2G027219_P01, GRMZM2G158097_P02, GRMZM2G017419_P01, GRMZM2G095082_P01, …
GO:0034613	cellular protein localization	BIOLOGICAL_PROCESS	0.0148705	36	263	1104	5228	GRMZM2G167463_P01, GRMZM5G861997_P01, GRMZM2G057402_P03, GRMZM2G040247_P01, GRMZM2G018484_P01, GRMZM2G166646_P01, GRMZM2G001918_P01, GRMZM5G823017_P01, GRMZM2G076539_P01, GRMZM2G473463_P01, GRMZM2G051879_P05, GRMZM2G165655_P01, GRMZM2G107205_P01, GRMZM5G839422_P01, GRMZM2G031360_P01, GRMZM2G162529_P01, GRMZM2G059015_P01, GRMZM5G892645_P02, GRMZM2G103544_P01, GRMZM2G384730_P01, GRMZM2G003979_P01, …
GO:0042743	hydrogen peroxide metabolic process	BIOLOGICAL_PROCESS	4.16467e-09	35	41	1105	5450	GRMZM5G828229_P02, GRMZM2G085967_P03, GRMZM2G150893_P01, GRMZM2G165655_P01, GRMZM6G514393_P01, GRMZM2G126261_P01, GRMZM5G839422_P01, GRMZM5G876898_P01, GRMZM2G136522_P01, GRMZM2G090568_P01, GRMZM2G162529_P01, GRMZM2G006144_P01, GRMZM2G037778_P01, GRMZM2G144648_P01, GRMZM2G394500_P01, GRMZM2G103544_P01, GRMZM2G047456_P04, GRMZM2G129781_P01, GRMZM2G001750_P01, GRMZM2G365774_P01, GRMZM2G450233_P01, …
GO:0042737	drug catabolic process	BIOLOGICAL_PROCESS	6.99074e-05	35	71	1105	5420	GRMZM5G828229_P02, GRMZM2G167637_P01, GRMZM2G085967_P03, GRMZM2G150893_P01, GRMZM6G514393_P01, GRMZM2G126261_P01, GRMZM2G047968_P03, GRMZM5G839422_P01, GRMZM5G876898_P01, GRMZM5G852968_P03, GRMZM2G136522_P01, GRMZM2G090568_P01, GRMZM2G127361_P01, GRMZM2G006144_P01, GRMZM2G037778_P01, GRMZM2G025182_P01, GRMZM2G144648_P01, GRMZM2G394500_P01, GRMZM2G104310_P03, GRMZM2G047456_P04, GRMZM2G365774_P01, …
GO:0006396	RNA processing	BIOLOGICAL_PROCESS	0.0191117	34	248	1106	5243	GRMZM2G468132_P01, GRMZM2G051247_P01, GRMZM2G003307_P02, GRMZM2G180909_P01, GRMZM2G119146_P01, GRMZM2G107205_P01, GRMZM2G103430_P02, GRMZM5G831993_P01, GRMZM2G455115_P01, GRMZM2G030659_P01, GRMZM2G082322_P01, GRMZM2G079658_P02, GRMZM2G375172_P01, GRMZM5G892645_P02, GRMZM2G028156_P01, GRMZM2G057646_P02, GRMZM5G813627_P02, GRMZM2G377761_P01, GRMZM2G005737_P01, GRMZM2G075942_P02, GRMZM2G096972_P01, …
GO:0006886	intracellular protein transport	BIOLOGICAL_PROCESS	0.033155	34	239	1106	5252	GRMZM2G167463_P01, GRMZM5G861997_P01, GRMZM2G057402_P03, GRMZM2G040247_P01, GRMZM2G018484_P01, GRMZM2G166646_P01, GRMZM2G001918_P01, GRMZM5G823017_P01, GRMZM2G076539_P01, GRMZM2G051879_P05, GRMZM2G165655_P01, GRMZM2G107205_P01, GRMZM5G839422_P01, GRMZM2G031360_P01, GRMZM2G162529_P01, GRMZM2G059015_P01, GRMZM5G892645_P02, GRMZM2G103544_P01, GRMZM2G384730_P01, GRMZM2G003979_P01, GRMZM2G082167_P01, …
GO:0009142	nucleoside triphosphate biosynthetic process	BIOLOGICAL_PROCESS	0.0077959	33	91	1107	5400	GRMZM2G104325_P01, GRMZM5G808402_P01, GRMZM2G051806_P01, GRMZM2G166646_P01, GRMZM2G021331_P01, GRMZM5G861064_P01, GRMZM2G467069_P03, GRMZM5G852968_P03, GRMZM2G098290_P02, GRMZM2G443985_P01, GRMZM2G004382_P01, GRMZM2G004534_P01, GRMZM2G314094_P01, GRMZM2G064302_P01, GRMZM2G009808_P01, GRMZM2G080375_P01, GRMZM2G047028_P01, GRMZM6G477257_P01, GRMZM5G833389_P02, GRMZM2G065083_P01, GRMZM2G127717_P01, …
GO:0098660	inorganic ion transmembrane transport	BIOLOGICAL_PROCESS	0.0116523	33	93	1107	5398	GRMZM2G067789_P01, GRMZM2G104325_P01, GRMZM5G808402_P01, GRMZM2G021331_P01, GRMZM2G083173_P01, GRMZM2G443728_P02, GRMZM5G861064_P01, GRMZM2G092780_P01, GRMZM2G001457_P02, GRMZM2G098290_P02, GRMZM2G096683_P01, GRMZM2G085301_P01, GRMZM2G067853_P01, GRMZM2G352695_P01, GRMZM2G104730_P02, GRMZM5G836886_P01, GRMZM5G859195_P01, GRMZM2G397247_P03, GRMZM2G069095_P01, GRMZM2G009715_P02, GRMZM2G102786_P01, …
GO:0044282	small molecule catabolic process	BIOLOGICAL_PROCESS	0.0181562	33	97	1107	5394	GRMZM5G861997_P01, GRMZM2G051879_P05, GRMZM2G702490_P02, GRMZM2G077541_P02, GRMZM5G876898_P01, GRMZM2G003565_P03, GRMZM2G025854_P04, GRMZM5G852968_P03, AC234201.1_FGP003, GRMZM2G019926_P03, GRMZM2G127361_P01, GRMZM2G120300_P01, GRMZM2G044337_P01, GRMZM2G033219_P01, GRMZM2G104310_P03, GRMZM2G009808_P01, GRMZM2G374302_P01, GRMZM5G833389_P02, GRMZM2G095082_P01, GRMZM2G085960_P02, GRMZM2G178960_P01, …
GO:0098655	cation transmembrane transport	BIOLOGICAL_PROCESS	0.0265404	33	100	1107	5391	GRMZM2G067789_P01, GRMZM2G104325_P01, GRMZM5G808402_P01, GRMZM2G021331_P01, GRMZM2G083173_P01, GRMZM2G443728_P02, GRMZM5G861064_P01, GRMZM2G001457_P02, GRMZM2G098290_P02, GRMZM2G096683_P01, GRMZM2G041050_P02, GRMZM2G085301_P01, GRMZM2G067853_P01, GRMZM2G352695_P01, GRMZM2G104730_P02, GRMZM5G836886_P01, GRMZM5G859195_P01, GRMZM2G397247_P03, GRMZM2G069095_P01, GRMZM2G009715_P02, GRMZM2G102786_P01, …
GO:0009206	purine ribonucleoside triphosphate biosynthetic process	BIOLOGICAL_PROCESS	0.00679034	32	87	1108	5404	GRMZM2G104325_P01, GRMZM5G808402_P01, GRMZM2G051806_P01, GRMZM2G166646_P01, GRMZM2G021331_P01, GRMZM5G861064_P01, GRMZM2G467069_P03, GRMZM5G852968_P03, GRMZM2G098290_P02, GRMZM2G443985_P01, GRMZM2G004382_P01, GRMZM2G004534_P01, GRMZM2G314094_P01, GRMZM2G064302_P01, GRMZM2G009808_P01, GRMZM2G080375_P01, GRMZM2G047028_P01, GRMZM6G477257_P01, GRMZM5G833389_P02, GRMZM2G065083_P01, GRMZM2G127717_P01, …
GO:0009145	purine nucleoside triphosphate biosynthetic process	BIOLOGICAL_PROCESS	0.00679034	32	87	1108	5404	GRMZM2G104325_P01, GRMZM5G808402_P01, GRMZM2G051806_P01, GRMZM2G166646_P01, GRMZM2G021331_P01, GRMZM5G861064_P01, GRMZM2G467069_P03, GRMZM5G852968_P03, GRMZM2G098290_P02, GRMZM2G443985_P01, GRMZM2G004382_P01, GRMZM2G004534_P01, GRMZM2G314094_P01, GRMZM2G064302_P01, GRMZM2G009808_P01, GRMZM2G080375_P01, GRMZM2G047028_P01, GRMZM6G477257_P01, GRMZM5G833389_P02, GRMZM2G065083_P01, GRMZM2G127717_P01, …
GO:0098662	inorganic cation transmembrane transport	BIOLOGICAL_PROCESS	0.0106378	32	90	1108	5401	GRMZM2G067789_P01, GRMZM2G104325_P01, GRMZM5G808402_P01, GRMZM2G021331_P01, GRMZM2G083173_P01, GRMZM2G443728_P02, GRMZM5G861064_P01, GRMZM2G001457_P02, GRMZM2G098290_P02, GRMZM2G096683_P01, GRMZM2G085301_P01, GRMZM2G067853_P01, GRMZM2G352695_P01, GRMZM2G104730_P02, GRMZM5G836886_P01, GRMZM5G859195_P01, GRMZM2G397247_P03, GRMZM2G069095_P01, GRMZM2G009715_P02, GRMZM2G102786_P01, GRMZM2G158097_P02, …
GO:0009201	ribonucleoside triphosphate biosynthetic process	BIOLOGICAL_PROCESS	0.0150952	32	91	1108	5400	GRMZM2G104325_P01, GRMZM5G808402_P01, GRMZM2G051806_P01, GRMZM2G166646_P01, GRMZM2G021331_P01, GRMZM5G861064_P01, GRMZM2G467069_P03, GRMZM5G852968_P03, GRMZM2G098290_P02, GRMZM2G443985_P01, GRMZM2G004382_P01, GRMZM2G004534_P01, GRMZM2G314094_P01, GRMZM2G064302_P01, GRMZM2G009808_P01, GRMZM2G080375_P01, GRMZM2G047028_P01, GRMZM6G477257_P01, GRMZM5G833389_P02, GRMZM2G065083_P01, GRMZM2G127717_P01, …
GO:0034404	nucleobase-containing small molecule biosynthetic process	BIOLOGICAL_PROCESS	0.0336054	32	98	1108	5393	GRMZM2G051806_P01, GRMZM2G166646_P01, GRMZM2G147450_P01, GRMZM2G029573_P01, GRMZM2G467069_P03, GRMZM5G852968_P03, GRMZM2G162529_P01, GRMZM2G098290_P02, GRMZM2G443985_P01, GRMZM2G463280_P02, GRMZM2G004382_P01, GRMZM2G004534_P01, GRMZM2G314094_P01, GRMZM2G064302_P01, GRMZM2G009808_P01, GRMZM2G080375_P01, GRMZM2G047028_P01, GRMZM6G477257_P01, GRMZM5G833389_P02, GRMZM2G065083_P01, GRMZM2G127717_P01, …
GO:0006754	ATP biosynthetic process	BIOLOGICAL_PROCESS	0.00795751	31	83	1109	5408	GRMZM2G104325_P01, GRMZM5G808402_P01, GRMZM2G051806_P01, GRMZM2G166646_P01, GRMZM2G021331_P01, GRMZM5G861064_P01, GRMZM2G467069_P03, GRMZM5G852968_P03, GRMZM2G098290_P02, GRMZM2G443985_P01, GRMZM2G004382_P01, GRMZM2G004534_P01, GRMZM2G314094_P01, GRMZM2G064302_P01, GRMZM2G009808_P01, GRMZM2G080375_P01, GRMZM2G047028_P01, GRMZM6G477257_P01, GRMZM5G833389_P02, GRMZM2G065083_P01, GRMZM2G127717_P01, …
GO:0008299	isoprenoid biosynthetic process	BIOLOGICAL_PROCESS	0.0144699	31	89	1109	5402	GRMZM2G165655_P01, GRMZM2G092780_P01, GRMZM5G876898_P01, GRMZM2G025882_P01, GRMZM2G025123_P01, GRMZM5G852968_P03, GRMZM2G136522_P01, GRMZM2G122715_P02, GRMZM2G127361_P01, GRMZM2G006144_P01, GRMZM2G037778_P01, GRMZM2G136344_P02, GRMZM5G859195_P01, GRMZM2G377761_P01, GRMZM2G082998_P01, GRMZM2G158097_P02, GRMZM2G017419_P01, GRMZM2G095082_P01, GRMZM2G074015_P02, GRMZM2G059252_P01, GRMZM2G117968_P01, …
GO:0071554	cell wall organization or biogenesis	BIOLOGICAL_PROCESS	0.0207074	31	91	1109	5400	GRMZM2G136803_P02, GRMZM2G167637_P01, GRMZM2G085967_P03, GRMZM2G026980_P01, GRMZM2G361064_P01, GRMZM6G514393_P01, GRMZM2G047968_P03, GRMZM2G092780_P01, GRMZM2G014558_P01, GRMZM2G009025_P01, GRMZM2G057296_P01, GRMZM2G025182_P01, AC234091.1_FGP001, GRMZM2G144648_P01, GRMZM2G394500_P01, GRMZM2G137077_P01, GRMZM2G044744_P01, GRMZM2G146192_P01, GRMZM2G365774_P01, GRMZM2G450233_P01, GRMZM2G111998_P01, …
GO:0051187	cofactor catabolic process	BIOLOGICAL_PROCESS	5.06096e-08	30	35	1110	5456	GRMZM5G828229_P02, GRMZM2G085967_P03, GRMZM2G150893_P01, GRMZM6G514393_P01, GRMZM2G126261_P01, GRMZM5G839422_P01, GRMZM5G876898_P01, GRMZM2G136522_P01, GRMZM2G090568_P01, GRMZM2G006144_P01, GRMZM2G037778_P01, GRMZM2G339563_P01, GRMZM2G144648_P01, GRMZM2G394500_P01, GRMZM2G047456_P04, GRMZM2G365774_P01, GRMZM2G450233_P01, GRMZM2G405459_P01, GRMZM2G133475_P01, GRMZM2G181258_P01, GRMZM2G122853_P01, …
GO:0030246	carbohydrate binding	MOLECULAR_FUNCTION	9.68405e-05	30	58	1110	5433	GRMZM2G136803_P02, GRMZM2G051806_P01, GRMZM2G166646_P01, GRMZM2G075958_P01, GRMZM2G097207_P01, GRMZM5G855776_P01, GRMZM2G467069_P03, GRMZM2G137535_P02, GRMZM2G020898_P01, GRMZM2G428518_P01, GRMZM2G021846_P01, GRMZM2G011373_P01, GRMZM2G127123_P03, GRMZM2G012758_P01, GRMZM2G133012_P01, GRMZM2G038973_P01, GRMZM2G042245_P01, GRMZM2G078566_P01, GRMZM2G047592_P02, GRMZM2G009282_P01, GRMZM2G007249_P01, …
GO:0072525	pyridine-containing compound biosynthetic process	BIOLOGICAL_PROCESS	0.00881211	29	77	1111	5414	GRMZM5G862488_P03, GRMZM2G051806_P01, GRMZM2G166646_P01, GRMZM2G467069_P03, GRMZM5G852968_P03, GRMZM2G098290_P02, GRMZM2G443985_P01, GRMZM2G004382_P01, GRMZM2G004534_P01, GRMZM2G314094_P01, GRMZM2G064302_P01, GRMZM2G009808_P01, GRMZM2G080375_P01, GRMZM2G047028_P01, GRMZM6G477257_P01, GRMZM5G833389_P02, GRMZM2G007651_P01, GRMZM2G065083_P01, GRMZM2G142836_P01, GRMZM2G127717_P01, GRMZM2G089136_P01, …
GO:0016791	phosphatase activity	MOLECULAR_FUNCTION	0.0249288	29	86	1111	5405	GRMZM2G166035_P01, GRMZM2G018441_P01, AC211394.4_FGP004, GRMZM5G829894_P01, GRMZM2G111164_P04, GRMZM2G056572_P03, GRMZM2G025882_P01, GRMZM2G051697_P01, GRMZM2G127374_P01, GRMZM2G045404_P01, GRMZM2G071087_P01, GRMZM2G322953_P05, GRMZM5G836250_P03, GRMZM2G011520_P01, GRMZM2G036007_P02, GRMZM2G004377_P02, GRMZM2G306732_P01, GRMZM2G095287_P01, GRMZM2G057140_P01, GRMZM2G120373_P01, GRMZM2G180471_P01, …
GO:0019363	pyridine nucleotide biosynthetic process	BIOLOGICAL_PROCESS	0.00697263	28	72	1112	5419	GRMZM5G862488_P03, GRMZM2G051806_P01, GRMZM2G166646_P01, GRMZM2G467069_P03, GRMZM5G852968_P03, GRMZM2G098290_P02, GRMZM2G443985_P01, GRMZM2G004382_P01, GRMZM2G004534_P01, GRMZM2G314094_P01, GRMZM2G064302_P01, GRMZM2G009808_P01, GRMZM2G080375_P01, GRMZM2G047028_P01, GRMZM6G477257_P01, GRMZM5G833389_P02, GRMZM2G065083_P01, GRMZM2G142836_P01, GRMZM2G127717_P01, GRMZM2G089136_P01, GRMZM2G068913_P01, …
GO:0019359	nicotinamide nucleotide biosynthetic process	BIOLOGICAL_PROCESS	0.00697263	28	72	1112	5419	GRMZM5G862488_P03, GRMZM2G051806_P01, GRMZM2G166646_P01, GRMZM2G467069_P03, GRMZM5G852968_P03, GRMZM2G098290_P02, GRMZM2G443985_P01, GRMZM2G004382_P01, GRMZM2G004534_P01, GRMZM2G314094_P01, GRMZM2G064302_P01, GRMZM2G009808_P01, GRMZM2G080375_P01, GRMZM2G047028_P01, GRMZM6G477257_P01, GRMZM5G833389_P02, GRMZM2G065083_P01, GRMZM2G142836_P01, GRMZM2G127717_P01, GRMZM2G089136_P01, GRMZM2G068913_P01, …
GO:0015672	monovalent inorganic cation transport	BIOLOGICAL_PROCESS	0.0129183	28	77	1112	5414	GRMZM2G067789_P01, GRMZM2G104325_P01, GRMZM5G808402_P01, GRMZM2G021331_P01, GRMZM2G083173_P01, GRMZM2G443728_P02, GRMZM5G861064_P01, GRMZM2G001457_P02, GRMZM2G098290_P02, GRMZM2G096683_P01, GRMZM2G085301_P01, GRMZM2G383088_P01, GRMZM5G859195_P01, GRMZM2G397247_P03, GRMZM2G069095_P01, GRMZM2G009715_P02, GRMZM2G102786_P01, GRMZM2G158097_P02, GRMZM5G801949_P02, GRMZM2G181151_P01, GRMZM2G058948_P01, …
GO:0009791	post-embryonic development	BIOLOGICAL_PROCESS	0.027738	28	208	1112	5283	GRMZM2G462625_P01, GRMZM2G180909_P01, GRMZM2G119146_P01, GRMZM2G179941_P01, GRMZM2G702490_P02, GRMZM2G346455_P06, GRMZM2G047968_P03, GRMZM5G876898_P01, GRMZM2G455115_P01, GRMZM2G122715_P02, GRMZM2G339563_P01, GRMZM5G805485_P01, GRMZM2G129781_P01, GRMZM2G088162_P01, AC177936.6_FGP008, GRMZM5G805350_P01, GRMZM2G319109_P01, GRMZM2G126190_P01, GRMZM2G364901_P04, GRMZM2G169160_P01, GRMZM2G478664_P01, …
GO:0042744	hydrogen peroxide catabolic process	BIOLOGICAL_PROCESS	7.60983e-08	27	29	1113	5462	GRMZM5G828229_P02, GRMZM2G085967_P03, GRMZM2G150893_P01, GRMZM6G514393_P01, GRMZM2G126261_P01, GRMZM5G839422_P01, GRMZM5G876898_P01, GRMZM2G136522_P01, GRMZM2G090568_P01, GRMZM2G006144_P01, GRMZM2G037778_P01, GRMZM2G144648_P01, GRMZM2G394500_P01, GRMZM2G047456_P04, GRMZM2G365774_P01, GRMZM2G450233_P01, GRMZM2G405459_P01, GRMZM2G133475_P01, GRMZM2G181258_P01, GRMZM2G122853_P01, GRMZM5G843748_P02, …
GO:0017001	antibiotic catabolic process	BIOLOGICAL_PROCESS	2.93788e-07	27	32	1113	5459	GRMZM5G828229_P02, GRMZM2G085967_P03, GRMZM2G150893_P01, GRMZM6G514393_P01, GRMZM2G126261_P01, GRMZM5G839422_P01, GRMZM5G876898_P01, GRMZM2G136522_P01, GRMZM2G090568_P01, GRMZM2G006144_P01, GRMZM2G037778_P01, GRMZM2G144648_P01, GRMZM2G394500_P01, GRMZM2G047456_P04, GRMZM2G365774_P01, GRMZM2G450233_P01, GRMZM2G405459_P01, GRMZM2G133475_P01, GRMZM2G181258_P01, GRMZM2G122853_P01, GRMZM5G843748_P02, …
GO:0006165	nucleoside diphosphate phosphorylation	BIOLOGICAL_PROCESS	0.00629767	27	69	1113	5422	GRMZM2G051806_P01, GRMZM2G166646_P01, GRMZM2G467069_P03, GRMZM5G852968_P03, GRMZM2G098290_P02, GRMZM2G443985_P01, GRMZM2G004382_P01, GRMZM2G004534_P01, GRMZM2G314094_P01, GRMZM2G064302_P01, GRMZM2G009808_P01, GRMZM2G080375_P01, GRMZM2G047028_P01, GRMZM6G477257_P01, GRMZM5G833389_P02, GRMZM2G065083_P01, GRMZM2G127717_P01, GRMZM2G089136_P01, GRMZM2G068913_P01, GRMZM2G013478_P01, GRMZM2G176397_P01, …
GO:0046434	organophosphate catabolic process	BIOLOGICAL_PROCESS	0.00925027	27	70	1113	5421	GRMZM2G051806_P01, GRMZM2G166646_P01, GRMZM2G467069_P03, GRMZM5G852968_P03, GRMZM2G098290_P02, GRMZM2G443985_P01, GRMZM2G004382_P01, GRMZM2G004534_P01, GRMZM2G314094_P01, GRMZM2G064302_P01, GRMZM2G009808_P01, GRMZM2G080375_P01, GRMZM2G047028_P01, GRMZM6G477257_P01, GRMZM5G833389_P02, GRMZM2G065083_P01, GRMZM2G127717_P01, GRMZM2G089136_P01, GRMZM2G068913_P01, GRMZM2G176397_P01, GRMZM2G036708_P01, …
GO:0009132	nucleoside diphosphate metabolic process	BIOLOGICAL_PROCESS	0.00925027	27	70	1113	5421	GRMZM2G051806_P01, GRMZM2G166646_P01, GRMZM2G467069_P03, GRMZM5G852968_P03, GRMZM2G098290_P02, GRMZM2G443985_P01, GRMZM2G004382_P01, GRMZM2G004534_P01, GRMZM2G314094_P01, GRMZM2G064302_P01, GRMZM2G009808_P01, GRMZM2G080375_P01, GRMZM2G047028_P01, GRMZM6G477257_P01, GRMZM5G833389_P02, GRMZM2G065083_P01, GRMZM2G127717_P01, GRMZM2G089136_P01, GRMZM2G068913_P01, GRMZM2G013478_P01, GRMZM2G176397_P01, …
GO:0046939	nucleotide phosphorylation	BIOLOGICAL_PROCESS	0.0272157	27	79	1113	5412	GRMZM2G051806_P01, GRMZM2G166646_P01, GRMZM2G467069_P03, GRMZM5G852968_P03, GRMZM2G098290_P02, GRMZM2G443985_P01, GRMZM2G004382_P01, GRMZM2G004534_P01, GRMZM2G314094_P01, GRMZM2G064302_P01, GRMZM2G009808_P01, GRMZM2G080375_P01, GRMZM2G047028_P01, GRMZM6G477257_P01, GRMZM5G833389_P02, GRMZM2G065083_P01, GRMZM2G127717_P01, GRMZM2G089136_P01, GRMZM2G068913_P01, GRMZM2G013478_P01, GRMZM2G176397_P01, …
GO:0006757	ATP generation from ADP	BIOLOGICAL_PROCESS	0.00715964	26	65	1114	5426	GRMZM2G051806_P01, GRMZM2G166646_P01, GRMZM2G467069_P03, GRMZM5G852968_P03, GRMZM2G098290_P02, GRMZM2G443985_P01, GRMZM2G004382_P01, GRMZM2G004534_P01, GRMZM2G314094_P01, GRMZM2G064302_P01, GRMZM2G009808_P01, GRMZM2G080375_P01, GRMZM2G047028_P01, GRMZM6G477257_P01, GRMZM5G833389_P02, GRMZM2G065083_P01, GRMZM2G127717_P01, GRMZM2G089136_P01, GRMZM2G068913_P01, GRMZM2G176397_P01, GRMZM2G036708_P01, …
GO:0042866	pyruvate biosynthetic process	BIOLOGICAL_PROCESS	0.00715964	26	65	1114	5426	GRMZM2G051806_P01, GRMZM2G166646_P01, GRMZM2G467069_P03, GRMZM5G852968_P03, GRMZM2G098290_P02, GRMZM2G443985_P01, GRMZM2G004382_P01, GRMZM2G004534_P01, GRMZM2G314094_P01, GRMZM2G064302_P01, GRMZM2G009808_P01, GRMZM2G080375_P01, GRMZM2G047028_P01, GRMZM6G477257_P01, GRMZM5G833389_P02, GRMZM2G065083_P01, GRMZM2G127717_P01, GRMZM2G089136_P01, GRMZM2G068913_P01, GRMZM2G176397_P01, GRMZM2G036708_P01, …
GO:0046031	ADP metabolic process	BIOLOGICAL_PROCESS	0.00715964	26	65	1114	5426	GRMZM2G051806_P01, GRMZM2G166646_P01, GRMZM2G467069_P03, GRMZM5G852968_P03, GRMZM2G098290_P02, GRMZM2G443985_P01, GRMZM2G004382_P01, GRMZM2G004534_P01, GRMZM2G314094_P01, GRMZM2G064302_P01, GRMZM2G009808_P01, GRMZM2G080375_P01, GRMZM2G047028_P01, GRMZM6G477257_P01, GRMZM5G833389_P02, GRMZM2G065083_P01, GRMZM2G127717_P01, GRMZM2G089136_P01, GRMZM2G068913_P01, GRMZM2G176397_P01, GRMZM2G036708_P01, …
GO:0006096	glycolytic process	BIOLOGICAL_PROCESS	0.00715964	26	65	1114	5426	GRMZM2G051806_P01, GRMZM2G166646_P01, GRMZM2G467069_P03, GRMZM5G852968_P03, GRMZM2G098290_P02, GRMZM2G443985_P01, GRMZM2G004382_P01, GRMZM2G004534_P01, GRMZM2G314094_P01, GRMZM2G064302_P01, GRMZM2G009808_P01, GRMZM2G080375_P01, GRMZM2G047028_P01, GRMZM6G477257_P01, GRMZM5G833389_P02, GRMZM2G065083_P01, GRMZM2G127717_P01, GRMZM2G089136_P01, GRMZM2G068913_P01, GRMZM2G176397_P01, GRMZM2G036708_P01, …
GO:0009166	nucleotide catabolic process	BIOLOGICAL_PROCESS	0.00715964	26	65	1114	5426	GRMZM2G051806_P01, GRMZM2G166646_P01, GRMZM2G467069_P03, GRMZM5G852968_P03, GRMZM2G098290_P02, GRMZM2G443985_P01, GRMZM2G004382_P01, GRMZM2G004534_P01, GRMZM2G314094_P01, GRMZM2G064302_P01, GRMZM2G009808_P01, GRMZM2G080375_P01, GRMZM2G047028_P01, GRMZM6G477257_P01, GRMZM5G833389_P02, GRMZM2G065083_P01, GRMZM2G127717_P01, GRMZM2G089136_P01, GRMZM2G068913_P01, GRMZM2G176397_P01, GRMZM2G036708_P01, …
GO:1901292	nucleoside phosphate catabolic process	BIOLOGICAL_PROCESS	0.00763714	26	66	1114	5425	GRMZM2G051806_P01, GRMZM2G166646_P01, GRMZM2G467069_P03, GRMZM5G852968_P03, GRMZM2G098290_P02, GRMZM2G443985_P01, GRMZM2G004382_P01, GRMZM2G004534_P01, GRMZM2G314094_P01, GRMZM2G064302_P01, GRMZM2G009808_P01, GRMZM2G080375_P01, GRMZM2G047028_P01, GRMZM6G477257_P01, GRMZM5G833389_P02, GRMZM2G065083_P01, GRMZM2G127717_P01, GRMZM2G089136_P01, GRMZM2G068913_P01, GRMZM2G176397_P01, GRMZM2G036708_P01, …
GO:0009135	purine nucleoside diphosphate metabolic process	BIOLOGICAL_PROCESS	0.00763714	26	66	1114	5425	GRMZM2G051806_P01, GRMZM2G166646_P01, GRMZM2G467069_P03, GRMZM5G852968_P03, GRMZM2G098290_P02, GRMZM2G443985_P01, GRMZM2G004382_P01, GRMZM2G004534_P01, GRMZM2G314094_P01, GRMZM2G064302_P01, GRMZM2G009808_P01, GRMZM2G080375_P01, GRMZM2G047028_P01, GRMZM6G477257_P01, GRMZM5G833389_P02, GRMZM2G065083_P01, GRMZM2G127717_P01, GRMZM2G089136_P01, GRMZM2G068913_P01, GRMZM2G176397_P01, GRMZM2G036708_P01, …
GO:0009179	purine ribonucleoside diphosphate metabolic process	BIOLOGICAL_PROCESS	0.00763714	26	66	1114	5425	GRMZM2G051806_P01, GRMZM2G166646_P01, GRMZM2G467069_P03, GRMZM5G852968_P03, GRMZM2G098290_P02, GRMZM2G443985_P01, GRMZM2G004382_P01, GRMZM2G004534_P01, GRMZM2G314094_P01, GRMZM2G064302_P01, GRMZM2G009808_P01, GRMZM2G080375_P01, GRMZM2G047028_P01, GRMZM6G477257_P01, GRMZM5G833389_P02, GRMZM2G065083_P01, GRMZM2G127717_P01, GRMZM2G089136_P01, GRMZM2G068913_P01, GRMZM2G176397_P01, GRMZM2G036708_P01, …
GO:0009185	ribonucleoside diphosphate metabolic process	BIOLOGICAL_PROCESS	0.00763714	26	66	1114	5425	GRMZM2G051806_P01, GRMZM2G166646_P01, GRMZM2G467069_P03, GRMZM5G852968_P03, GRMZM2G098290_P02, GRMZM2G443985_P01, GRMZM2G004382_P01, GRMZM2G004534_P01, GRMZM2G314094_P01, GRMZM2G064302_P01, GRMZM2G009808_P01, GRMZM2G080375_P01, GRMZM2G047028_P01, GRMZM6G477257_P01, GRMZM5G833389_P02, GRMZM2G065083_P01, GRMZM2G127717_P01, GRMZM2G089136_P01, GRMZM2G068913_P01, GRMZM2G176397_P01, GRMZM2G036708_P01, …
GO:0022890	inorganic cation transmembrane transporter activity	MOLECULAR_FUNCTION	0.0333231	26	76	1114	5415	GRMZM2G067789_P01, GRMZM2G104325_P01, GRMZM5G808402_P01, GRMZM2G021331_P01, GRMZM2G083173_P01, GRMZM2G443728_P02, GRMZM5G861064_P01, GRMZM2G034302_P01, GRMZM2G096683_P01, GRMZM2G041050_P02, GRMZM2G085301_P01, GRMZM2G067853_P01, GRMZM2G352695_P01, GRMZM2G104730_P02, GRMZM5G836886_P01, GRMZM2G009715_P02, GRMZM2G102786_P01, GRMZM2G315931_P01, GRMZM5G801949_P02, GRMZM2G058948_P01, GRMZM2G019404_P01, …
GO:1901657	glycosyl compound metabolic process	BIOLOGICAL_PROCESS	0.0169658	25	67	1115	5424	GRMZM2G147450_P01, GRMZM2G111164_P04, GRMZM2G029573_P01, GRMZM2G025882_P01, GRMZM2G488458_P01, GRMZM2G162529_P01, GRMZM2G463280_P02, GRMZM2G339699_P01, GRMZM2G076946_P02, GRMZM2G108133_P01, GRMZM2G082998_P01, AC217401.3_FGP002, GRMZM2G051949_P01, AC148152.3_FGP008, GRMZM2G067176_P01, GRMZM2G085960_P02, GRMZM2G055699_P01, GRMZM2G130085_P03, GRMZM2G449496_P01, GRMZM2G077015_P01, GRMZM2G013478_P01, …
GO:0008236	serine-type peptidase activity	MOLECULAR_FUNCTION	0.0108581	25	65	1115	5426	GRMZM2G018950_P01, AC198353.5_FGP001, GRMZM2G000719_P01, GRMZM2G047319_P01, GRMZM2G348873_P01, GRMZM2G015238_P01, GRMZM2G118646_P01, GRMZM2G071582_P02, GRMZM2G327595_P01, GRMZM2G128056_P01, GRMZM2G379002_P01, GRMZM2G031572_P01, GRMZM2G163749_P01, GRMZM2G075676_P03, GRMZM2G159016_P01, GRMZM2G140432_P01, GRMZM2G118241_P01, GRMZM2G076417_P01, GRMZM2G157156_P02, GRMZM2G130085_P03, GRMZM2G080499_P01, …
GO:0017171	serine hydrolase activity	MOLECULAR_FUNCTION	0.0108581	25	65	1115	5426	GRMZM2G018950_P01, AC198353.5_FGP001, GRMZM2G000719_P01, GRMZM2G047319_P01, GRMZM2G348873_P01, GRMZM2G015238_P01, GRMZM2G118646_P01, GRMZM2G071582_P02, GRMZM2G327595_P01, GRMZM2G128056_P01, GRMZM2G379002_P01, GRMZM2G031572_P01, GRMZM2G163749_P01, GRMZM2G075676_P03, GRMZM2G159016_P01, GRMZM2G140432_P01, GRMZM2G118241_P01, GRMZM2G076417_P01, GRMZM2G157156_P02, GRMZM2G130085_P03, GRMZM2G080499_P01, …
GO:0006470	protein dephosphorylation	BIOLOGICAL_PROCESS	0.0128662	24	61	1116	5430	GRMZM2G166035_P01, GRMZM2G011520_P01, AC211394.4_FGP004, GRMZM2G004377_P02, GRMZM2G319109_P01, GRMZM2G095082_P01, GRMZM2G165655_P01, GRMZM5G829894_P01, GRMZM2G056572_P03, GRMZM5G839422_P01, GRMZM2G025882_P01, GRMZM2G015967_P01, GRMZM2G488458_P01, GRMZM2G162529_P01, GRMZM2G127374_P01, GRMZM2G120373_P01, GRMZM2G180471_P01, GRMZM2G045404_P01, GRMZM2G003096_P01, GRMZM2G071087_P01, GRMZM2G110063_P02, …
GO:1902600	proton transmembrane transport	BIOLOGICAL_PROCESS	0.0354235	24	68	1116	5423	GRMZM2G069095_P01, GRMZM2G009715_P02, GRMZM2G102786_P01, GRMZM2G067789_P01, GRMZM2G104325_P01, GRMZM2G158097_P02, GRMZM5G808402_P01, GRMZM5G801949_P02, GRMZM2G021331_P01, GRMZM2G083173_P01, GRMZM2G181151_P01, GRMZM5G861064_P01, GRMZM2G058948_P01, GRMZM2G001457_P02, GRMZM2G019404_P01, GRMZM2G098290_P02, GRMZM2G096683_P01, GRMZM2G004694_P01, GRMZM2G085301_P01, GRMZM2G374812_P01, GRMZM2G003096_P01, …
GO:0098869	cellular oxidant detoxification	BIOLOGICAL_PROCESS	0.0179236	23	60	1117	5431	GRMZM2G365774_P01, GRMZM2G450233_P01, GRMZM2G405459_P01, GRMZM2G133475_P01, GRMZM2G085967_P03, GRMZM2G150893_P01, GRMZM2G122853_P01, GRMZM6G514393_P01, GRMZM2G126261_P01, GRMZM2G047968_P03, GRMZM5G843748_P02, GRMZM2G136522_P01, GRMZM2G090568_P01, AC197758.3_FGP004, GRMZM2G172322_P01, GRMZM2G144648_P01, GRMZM2G471357_P01, GRMZM2G394500_P01, GRMZM2G441541_P02, GRMZM2G320269_P01, AC211737.3_FGP012, …
GO:1990748	cellular detoxification	BIOLOGICAL_PROCESS	0.0188658	23	61	1117	5430	GRMZM2G365774_P01, GRMZM2G450233_P01, GRMZM2G405459_P01, GRMZM2G133475_P01, GRMZM2G085967_P03, GRMZM2G150893_P01, GRMZM2G122853_P01, GRMZM6G514393_P01, GRMZM2G126261_P01, GRMZM2G047968_P03, GRMZM5G843748_P02, GRMZM2G136522_P01, GRMZM2G090568_P01, AC197758.3_FGP004, GRMZM2G172322_P01, GRMZM2G144648_P01, GRMZM2G471357_P01, GRMZM2G394500_P01, GRMZM2G441541_P02, GRMZM2G320269_P01, AC211737.3_FGP012, …
GO:0097237	cellular response to toxic substance	BIOLOGICAL_PROCESS	0.0339795	23	66	1117	5425	GRMZM2G365774_P01, GRMZM2G450233_P01, GRMZM2G405459_P01, GRMZM2G133475_P01, GRMZM2G085967_P03, GRMZM2G150893_P01, GRMZM2G122853_P01, GRMZM6G514393_P01, GRMZM2G126261_P01, GRMZM2G047968_P03, GRMZM5G843748_P02, GRMZM2G136522_P01, GRMZM2G090568_P01, AC197758.3_FGP004, GRMZM2G172322_P01, GRMZM2G144648_P01, GRMZM2G471357_P01, GRMZM2G394500_P01, GRMZM2G441541_P02, GRMZM2G320269_P01, AC211737.3_FGP012, …
GO:0015291	secondary active transmembrane transporter activity	MOLECULAR_FUNCTION	0.000271182	23	40	1117	5451	GRMZM2G009715_P02, GRMZM2G067789_P01, GRMZM2G359038_P01, GRMZM2G174107_P01, GRMZM5G801949_P02, GRMZM2G083173_P01, GRMZM2G031177_P01, GRMZM2G088196_P01, GRMZM2G092780_P01, GRMZM2G034302_P01, GRMZM2G058948_P01, GRMZM2G389233_P03, GRMZM2G042313_P01, GRMZM2G096683_P01, GRMZM2G004694_P01, GRMZM2G041050_P02, GRMZM2G085301_P01, GRMZM2G374812_P01, GRMZM2G086258_P02, GRMZM2G002391_P02, GRMZM2G093643_P01, …
GO:0016209	antioxidant activity	MOLECULAR_FUNCTION	0.0103292	23	57	1117	5434	GRMZM2G365774_P01, GRMZM2G450233_P01, GRMZM2G405459_P01, GRMZM2G133475_P01, GRMZM2G085967_P03, GRMZM2G150893_P01, GRMZM2G122853_P01, GRMZM6G514393_P01, GRMZM2G126261_P01, GRMZM2G047968_P03, GRMZM5G843748_P02, GRMZM2G136522_P01, GRMZM2G090568_P01, AC197758.3_FGP004, GRMZM2G172322_P01, GRMZM2G144648_P01, GRMZM2G471357_P01, GRMZM2G394500_P01, GRMZM2G441541_P02, GRMZM2G320269_P01, AC211737.3_FGP012, …
GO:0009668	plastid membrane organization	BIOLOGICAL_PROCESS	0.00324582	22	47	1118	5444	GRMZM2G087598_P02, GRMZM2G319109_P01, GRMZM2G095082_P01, GRMZM2G059252_P01, GRMZM2G165655_P01, GRMZM2G171871_P01, GRMZM5G839422_P01, GRMZM2G130085_P03, GRMZM2G110408_P01, GRMZM2G449496_P01, GRMZM2G136522_P01, GRMZM2G015967_P01, GRMZM2G488458_P01, GRMZM2G089696_P01, GRMZM2G037778_P01, GRMZM2G339563_P01, GRMZM2G101617_P01, GRMZM2G126361_P02, GRMZM2G007907_P01, GRMZM2G003096_P01, GRMZM2G110063_P02, …
GO:0010027	thylakoid membrane organization	BIOLOGICAL_PROCESS	0.00324582	22	47	1118	5444	GRMZM2G087598_P02, GRMZM2G319109_P01, GRMZM2G095082_P01, GRMZM2G059252_P01, GRMZM2G165655_P01, GRMZM2G171871_P01, GRMZM5G839422_P01, GRMZM2G130085_P03, GRMZM2G110408_P01, GRMZM2G449496_P01, GRMZM2G136522_P01, GRMZM2G015967_P01, GRMZM2G488458_P01, GRMZM2G089696_P01, GRMZM2G037778_P01, GRMZM2G339563_P01, GRMZM2G101617_P01, GRMZM2G126361_P02, GRMZM2G007907_P01, GRMZM2G003096_P01, GRMZM2G110063_P02, …
GO:0034660	ncRNA metabolic process	BIOLOGICAL_PROCESS	0.00342144	22	196	1118	5295	GRMZM2G022192_P01, GRMZM5G805350_P01, GRMZM2G319109_P01, GRMZM2G123204_P01, GRMZM2G095082_P01, GRMZM2G166713_P01, GRMZM2G165655_P01, GRMZM2G455085_P01, GRMZM2G107205_P01, GRMZM5G839422_P01, GRMZM2G169160_P01, GRMZM2G449496_P01, GRMZM2G478664_P01, GRMZM2G091560_P01, GRMZM2G037778_P01, GRMZM2G336065_P01, GRMZM2G110063_P02, GRMZM2G161459_P02, GRMZM2G109284_P01, GRMZM2G099630_P01, GRMZM2G377761_P01, …
GO:0030001	metal ion transport	BIOLOGICAL_PROCESS	0.0147525	22	56	1118	5435	GRMZM2G009715_P02, GRMZM2G102786_P01, GRMZM2G315931_P01, GRMZM2G075502_P01, GRMZM2G443728_P02, GRMZM2G055704_P01, GRMZM2G094224_P01, GRMZM5G852968_P03, GRMZM2G058948_P01, GRMZM2G040933_P02, GRMZM2G067853_P01, GRMZM2G383088_P01, GRMZM2G352695_P01, GRMZM2G104730_P02, GRMZM2G086258_P02, GRMZM2G012397_P01, GRMZM2G040878_P01, GRMZM5G836886_P01, GRMZM2G093643_P01, GRMZM2G094742_P03, GRMZM2G140328_P01, …
GO:0071555	cell wall organization	BIOLOGICAL_PROCESS	0.0147525	22	56	1118	5435	GRMZM2G365774_P01, GRMZM2G450233_P01, GRMZM2G136803_P02, GRMZM2G167637_P01, GRMZM2G085967_P03, GRMZM2G026980_P01, GRMZM2G361064_P01, GRMZM2G122853_P01, GRMZM6G514393_P01, GRMZM2G045596_P01, GRMZM2G092780_P01, GRMZM2G014558_P01, GRMZM2G009025_P01, GRMZM2G057296_P01, GRMZM2G025182_P01, GRMZM2G144648_P01, GRMZM2G394500_P01, GRMZM2G137077_P01, GRMZM2G044744_P01, GRMZM2G078890_P01, GRMZM2G320269_P01, …
GO:0045229	external encapsulating structure organization	BIOLOGICAL_PROCESS	0.0281422	22	61	1118	5430	GRMZM2G365774_P01, GRMZM2G450233_P01, GRMZM2G136803_P02, GRMZM2G167637_P01, GRMZM2G085967_P03, GRMZM2G026980_P01, GRMZM2G361064_P01, GRMZM2G122853_P01, GRMZM6G514393_P01, GRMZM2G045596_P01, GRMZM2G092780_P01, GRMZM2G014558_P01, GRMZM2G009025_P01, GRMZM2G057296_P01, GRMZM2G025182_P01, GRMZM2G144648_P01, GRMZM2G394500_P01, GRMZM2G137077_P01, GRMZM2G044744_P01, GRMZM2G078890_P01, GRMZM2G320269_P01, …
GO:0050660	flavin adenine dinucleotide binding	MOLECULAR_FUNCTION	8.00154e-05	22	33	1118	5458	GRMZM2G320307_P02, GRMZM5G828229_P02, GRMZM2G079888_P01, GRMZM2G143357_P01, GRMZM5G891783_P01, GRMZM2G117369_P01, GRMZM2G052630_P03, GRMZM2G004128_P01, GRMZM5G891783_P02, GRMZM2G161306_P01, GRMZM2G135029_P03, GRMZM2G335657_P01, GRMZM2G068639_P01, GRMZM2G172322_P01, GRMZM2G145595_P01, GRMZM2G136344_P02, GRMZM2G064799_P01, GRMZM2G106600_P01, GRMZM2G381051_P03, GRMZM2G050984_P01, GRMZM2G084881_P01, …
GO:0006778	porphyrin-containing compound metabolic process	BIOLOGICAL_PROCESS	0.00255853	21	44	1119	5447	GRMZM2G162672_P02, GRMZM2G009785_P01, GRMZM2G364901_P04, GRMZM2G095082_P01, GRMZM2G165655_P01, GRMZM2G025882_P01, GRMZM2G449496_P01, GRMZM2G136522_P01, GRMZM2G114739_P01, GRMZM2G015967_P01, GRMZM2G122715_P02, GRMZM2G111216_P01, GRMZM2G127361_P01, GRMZM2G339563_P01, GRMZM2G109165_P01, GRMZM2G458824_P01, GRMZM2G116258_P01, GRMZM5G859195_P01, GRMZM2G377761_P01, GRMZM2G039396_P01, GRMZM2G027219_P01
GO:0033013	tetrapyrrole metabolic process	BIOLOGICAL_PROCESS	0.00297732	21	45	1119	5446	GRMZM2G162672_P02, GRMZM2G009785_P01, GRMZM2G364901_P04, GRMZM2G095082_P01, GRMZM2G165655_P01, GRMZM2G025882_P01, GRMZM2G449496_P01, GRMZM2G136522_P01, GRMZM2G114739_P01, GRMZM2G015967_P01, GRMZM2G122715_P02, GRMZM2G111216_P01, GRMZM2G127361_P01, GRMZM2G339563_P01, GRMZM2G109165_P01, GRMZM2G458824_P01, GRMZM2G116258_P01, GRMZM5G859195_P01, GRMZM2G377761_P01, GRMZM2G039396_P01, GRMZM2G027219_P01
GO:0019288	isopentenyl diphosphate biosynthetic process, methylerythritol 4-phosphate pathway	BIOLOGICAL_PROCESS	0.020996	21	55	1119	5436	GRMZM2G158097_P02, GRMZM2G095082_P01, GRMZM2G059252_P01, GRMZM2G117968_P01, GRMZM2G165655_P01, GRMZM2G025882_P01, GRMZM2G172032_P01, GRMZM5G852968_P03, GRMZM2G136522_P01, GRMZM2G015967_P01, GRMZM2G089696_P01, GRMZM2G122715_P02, GRMZM2G013478_P01, GRMZM2G127361_P01, GRMZM2G006144_P01, GRMZM2G037778_P01, GRMZM2G036708_P01, GRMZM2G109165_P01, GRMZM5G859195_P01, GRMZM2G377761_P01, GRMZM2G082998_P01
GO:0046490	isopentenyl diphosphate metabolic process	BIOLOGICAL_PROCESS	0.0365778	21	59	1119	5432	GRMZM2G158097_P02, GRMZM2G095082_P01, GRMZM2G059252_P01, GRMZM2G117968_P01, GRMZM2G165655_P01, GRMZM2G025882_P01, GRMZM2G172032_P01, GRMZM5G852968_P03, GRMZM2G136522_P01, GRMZM2G015967_P01, GRMZM2G089696_P01, GRMZM2G122715_P02, GRMZM2G013478_P01, GRMZM2G127361_P01, GRMZM2G006144_P01, GRMZM2G037778_P01, GRMZM2G036708_P01, GRMZM2G109165_P01, GRMZM5G859195_P01, GRMZM2G377761_P01, GRMZM2G082998_P01
GO:0009240	isopentenyl diphosphate biosynthetic process	BIOLOGICAL_PROCESS	0.0365778	21	59	1119	5432	GRMZM2G158097_P02, GRMZM2G095082_P01, GRMZM2G059252_P01, GRMZM2G117968_P01, GRMZM2G165655_P01, GRMZM2G025882_P01, GRMZM2G172032_P01, GRMZM5G852968_P03, GRMZM2G136522_P01, GRMZM2G015967_P01, GRMZM2G089696_P01, GRMZM2G122715_P02, GRMZM2G013478_P01, GRMZM2G127361_P01, GRMZM2G006144_P01, GRMZM2G037778_P01, GRMZM2G036708_P01, GRMZM2G109165_P01, GRMZM5G859195_P01, GRMZM2G377761_P01, GRMZM2G082998_P01
GO:0008238	exopeptidase activity	MOLECULAR_FUNCTION	0.000689487	21	38	1119	5453	GRMZM2G155580_P02, GRMZM2G118241_P01, GRMZM2G018950_P01, GRMZM2G101438_P02, AC198353.5_FGP001, GRMZM2G169095_P01, GRMZM2G080499_P01, GRMZM2G015238_P01, GRMZM2G327595_P01, GRMZM2G021110_P01, GRMZM2G090010_P02, GRMZM2G389233_P03, GRMZM2G128056_P01, GRMZM2G178958_P01, GRMZM2G123815_P01, GRMZM2G031572_P01, AC211737.3_FGP012, GRMZM5G883741_P02, GRMZM2G025531_P01, GRMZM2G075676_P03, GRMZM2G159016_P01
GO:0016684	oxidoreductase activity, acting on peroxide as acceptor	MOLECULAR_FUNCTION	0.00199114	21	42	1119	5449	GRMZM2G365774_P01, GRMZM2G450233_P01, GRMZM2G405459_P01, GRMZM2G133475_P01, GRMZM2G085967_P03, GRMZM2G150893_P01, GRMZM2G122853_P01, GRMZM6G514393_P01, GRMZM2G126261_P01, GRMZM2G047968_P03, GRMZM5G843748_P02, GRMZM2G090568_P01, AC197758.3_FGP004, GRMZM2G144648_P01, GRMZM2G471357_P01, GRMZM2G394500_P01, GRMZM2G441541_P02, GRMZM2G320269_P01, AC211737.3_FGP012, GRMZM2G047456_P04, GRMZM2G130904_P01
GO:0004601	peroxidase activity	MOLECULAR_FUNCTION	0.00199114	21	42	1119	5449	GRMZM2G365774_P01, GRMZM2G450233_P01, GRMZM2G405459_P01, GRMZM2G133475_P01, GRMZM2G085967_P03, GRMZM2G150893_P01, GRMZM2G122853_P01, GRMZM6G514393_P01, GRMZM2G126261_P01, GRMZM2G047968_P03, GRMZM5G843748_P02, GRMZM2G090568_P01, AC197758.3_FGP004, GRMZM2G144648_P01, GRMZM2G471357_P01, GRMZM2G394500_P01, GRMZM2G441541_P02, GRMZM2G320269_P01, AC211737.3_FGP012, GRMZM2G047456_P04, GRMZM2G130904_P01
GO:0010207	photosystem II assembly	BIOLOGICAL_PROCESS	0.000186837	20	30	1120	5461	GRMZM2G319109_P01, GRMZM2G044247_P01, GRMZM2G095082_P01, GRMZM2G059252_P01, GRMZM2G165655_P01, GRMZM2G479000_P01, GRMZM5G839422_P01, GRMZM2G025882_P01, GRMZM2G094224_P01, GRMZM2G015967_P01, GRMZM2G488458_P01, GRMZM2G122715_P02, GRMZM2G162529_P01, GRMZM2G111216_P01, GRMZM2G087435_P01, GRMZM2G007907_P01, GRMZM2G003096_P01, GRMZM2G110063_P02, GRMZM2G109165_P01, GRMZM2G049547_P03
GO:0016651	oxidoreductase activity, acting on NAD(P)H	MOLECULAR_FUNCTION	0.0277667	20	53	1120	5438	GRMZM2G048324_P01, GRMZM2G145854_P01, GRMZM5G878308_P01, GRMZM2G069708_P01, GRMZM2G136522_P01, GRMZM2G448142_P01, GRMZM2G127361_P01, GRMZM5G874448_P01, GRMZM2G335657_P01, GRMZM2G172322_P01, GRMZM5G800096_P01, GRMZM2G137648_P01, GRMZM2G145595_P01, GRMZM2G444541_P03, GRMZM5G834128_P01, GRMZM2G044744_P01, GRMZM2G441541_P02, GRMZM5G866223_P01, GRMZM2G084881_P01, GRMZM2G061830_P02
GO:0015994	chlorophyll metabolic process	BIOLOGICAL_PROCESS	0.00424556	19	39	1121	5452	GRMZM2G162672_P02, GRMZM2G009785_P01, GRMZM2G095082_P01, GRMZM2G165655_P01, GRMZM2G025882_P01, GRMZM2G449496_P01, GRMZM2G136522_P01, GRMZM2G114739_P01, GRMZM2G015967_P01, GRMZM2G122715_P02, GRMZM2G111216_P01, GRMZM2G127361_P01, GRMZM2G339563_P01, GRMZM2G109165_P01, GRMZM2G458824_P01, GRMZM2G116258_P01, GRMZM2G377761_P01, GRMZM2G039396_P01, GRMZM2G027219_P01
GO:0006721	terpenoid metabolic process	BIOLOGICAL_PROCESS	0.00471376	19	40	1121	5451	GRMZM2G009785_P01, GRMZM2G165655_P01, GRMZM2G088196_P01, GRMZM2G092780_P01, GRMZM5G876898_P01, GRMZM2G025882_P01, GRMZM2G449496_P01, GRMZM2G025123_P01, GRMZM2G136522_P01, GRMZM2G015967_P01, GRMZM2G057243_P01, AC234201.1_FGP003, GRMZM2G127361_P01, GRMZM2G037778_P01, GRMZM2G136344_P02, GRMZM2G108457_P02, GRMZM5G859195_P01, GRMZM2G377761_P01, GRMZM2G027219_P01
GO:0042493	response to drug	BIOLOGICAL_PROCESS	0.0215296	19	48	1121	5443	GRMZM2G359038_P01, GRMZM2G095082_P01, GRMZM2G031177_P01, GRMZM2G165655_P01, GRMZM5G861064_P01, GRMZM2G015967_P01, GRMZM2G090568_P01, GRMZM2G034302_P01, GRMZM2G013478_P01, GRMZM2G162529_P01, GRMZM2G389233_P03, GRMZM2G041050_P02, GRMZM2G010328_P01, GRMZM2G103544_P01, GRMZM2G048435_P02, GRMZM2G086258_P02, GRMZM2G118409_P01, GRMZM5G890665_P02, GRMZM2G064473_P01
GO:0140098	catalytic activity, acting on RNA	MOLECULAR_FUNCTION	0.00486071	19	175	1121	5316	GRMZM2G022192_P01, GRMZM2G468132_P01, GRMZM2G175463_P02, GRMZM5G805350_P01, GRMZM2G166713_P01, GRMZM2G455085_P01, GRMZM2G107205_P01, GRMZM2G032110_P01, GRMZM2G169160_P01, GRMZM2G478664_P01, GRMZM2G030659_P01, GRMZM2G044306_P01, GRMZM2G403636_P01, GRMZM2G091560_P01, GRMZM2G090869_P01, GRMZM5G892645_P02, GRMZM2G161459_P02, GRMZM2G377761_P01, GRMZM2G703415_P01
GO:0005982	starch metabolic process	BIOLOGICAL_PROCESS	0.00648109	18	38	1122	5453	GRMZM2G136803_P02, GRMZM2G158097_P02, GRMZM2G105791_P01, GRMZM2G178826_P03, GRMZM2G163437_P01, GRMZM2G130085_P03, GRMZM2G150796_P01, GRMZM2G129451_P02, GRMZM2G025854_P04, GRMZM2G136522_P01, GRMZM2G089696_P01, GRMZM2G122715_P02, GRMZM2G127374_P01, GRMZM2G391936_P02, GRMZM2G026969_P01, GRMZM2G044744_P01, GRMZM2G008263_P02, GRMZM2G412611_P01
GO:0033365	protein localization to organelle	BIOLOGICAL_PROCESS	0.0438919	18	143	1122	5348	GRMZM2G167463_P01, GRMZM5G861997_P01, GRMZM2G057402_P03, GRMZM2G040247_P01, GRMZM2G018484_P01, GRMZM2G166646_P01, GRMZM2G076539_P01, GRMZM2G473463_P01, GRMZM5G839422_P01, GRMZM2G058498_P01, GRMZM2G163709_P02, GRMZM2G120876_P01, GRMZM2G059015_P01, GRMZM2G110063_P02, GRMZM2G384730_P01, GRMZM2G089507_P01, GRMZM2G005036_P01, GRMZM2G080775_P01
GO:0009767	photosynthetic electron transport chain	BIOLOGICAL_PROCESS	2.09893e-06	17	14	1123	5477	GRMZM2G328908_P01, GRMZM2G315931_P01, GRMZM2G087598_P02, GRMZM2G044247_P01, GRMZM2G095082_P01, GRMZM2G025882_P01, GRMZM2G427369_P01, GRMZM2G110408_P01, GRMZM2G015967_P01, GRMZM2G122715_P02, GRMZM2G162529_P01, GRMZM5G838196_P02, GRMZM2G126361_P02, GRMZM5G808939_P01, GRMZM5G815553_P01, GRMZM2G011373_P01, GRMZM5G856777_P01
GO:0016108	tetraterpenoid metabolic process	BIOLOGICAL_PROCESS	0.000263684	16	22	1124	5469	GRMZM2G009785_P01, GRMZM2G165655_P01, GRMZM2G088196_P01, GRMZM2G092780_P01, GRMZM5G876898_P01, GRMZM2G025882_P01, GRMZM2G449496_P01, GRMZM2G136522_P01, GRMZM2G015967_P01, GRMZM2G057243_P01, GRMZM2G127361_P01, GRMZM2G037778_P01, GRMZM2G136344_P02, GRMZM2G108457_P02, GRMZM2G377761_P01, GRMZM2G027219_P01
GO:0016116	carotenoid metabolic process	BIOLOGICAL_PROCESS	0.000263684	16	22	1124	5469	GRMZM2G009785_P01, GRMZM2G165655_P01, GRMZM2G088196_P01, GRMZM2G092780_P01, GRMZM5G876898_P01, GRMZM2G025882_P01, GRMZM2G449496_P01, GRMZM2G136522_P01, GRMZM2G015967_P01, GRMZM2G057243_P01, GRMZM2G127361_P01, GRMZM2G037778_P01, GRMZM2G136344_P02, GRMZM2G108457_P02, GRMZM2G377761_P01, GRMZM2G027219_P01
GO:0032259	methylation	BIOLOGICAL_PROCESS	0.0142302	16	144	1124	5347	GRMZM2G418752_P01, GRMZM2G147450_P01, GRMZM2G005771_P02, GRMZM2G093666_P01, GRMZM2G029573_P01, GRMZM5G876898_P01, AC215260.3_FGP004, GRMZM2G051697_P01, GRMZM2G131708_P01, GRMZM2G547542_P01, GRMZM2G336065_P01, GRMZM2G104730_P02, GRMZM2G442804_P03, GRMZM2G099630_P01, GRMZM2G054162_P01, GRMZM2G082998_P01
GO:0072594	establishment of protein localization to organelle	BIOLOGICAL_PROCESS	0.04575	16	131	1124	5360	GRMZM2G167463_P01, GRMZM5G861997_P01, GRMZM2G057402_P03, GRMZM2G040247_P01, GRMZM2G018484_P01, GRMZM2G166646_P01, GRMZM2G076539_P01, GRMZM5G839422_P01, GRMZM2G058498_P01, GRMZM2G163709_P02, GRMZM2G120876_P01, GRMZM2G059015_P01, GRMZM2G110063_P02, GRMZM2G384730_P01, GRMZM2G005036_P01, GRMZM2G080775_P01
GO:0005198	structural molecule activity	MOLECULAR_FUNCTION	7.75081e-10	16	282	1124	5209	GRMZM2G003033_P01, GRMZM2G336908_P01, GRMZM2G126190_P01, GRMZM2G305115_P01, GRMZM2G054896_P01, GRMZM2G377600_P01, GRMZM2G145496_P01, GRMZM2G474534_P02, GRMZM2G096424_P01, GRMZM2G137849_P01, GRMZM2G059015_P01, GRMZM2G100976_P01, GRMZM2G109165_P01, GRMZM2G032351_P01, GRMZM5G858556_P01, GRMZM2G170035_P01
GO:0022613	ribonucleoprotein complex biogenesis	BIOLOGICAL_PROCESS	0.000858547	15	164	1125	5327	GRMZM2G003307_P02, GRMZM2G123204_P01, GRMZM2G377600_P01, GRMZM2G101867_P01, GRMZM2G103430_P02, GRMZM5G831993_P01, GRMZM2G336065_P01, GRMZM2G379758_P01, GRMZM2G157034_P02, GRMZM2G028156_P01, GRMZM2G028096_P02, GRMZM2G109284_P01, GRMZM2G377761_P01, GRMZM5G858556_P01, GRMZM2G075942_P02
GO:0019252	starch biosynthetic process	BIOLOGICAL_PROCESS	0.0188657	15	33	1125	5458	GRMZM2G136803_P02, GRMZM2G158097_P02, GRMZM2G105791_P01, GRMZM2G178826_P03, GRMZM2G163437_P01, GRMZM2G130085_P03, GRMZM2G129451_P02, GRMZM2G025854_P04, GRMZM2G136522_P01, GRMZM2G089696_P01, GRMZM2G122715_P02, GRMZM2G391936_P02, GRMZM2G026969_P01, GRMZM2G044744_P01, GRMZM2G008263_P02
GO:0009063	cellular amino acid catabolic process	BIOLOGICAL_PROCESS	0.0188657	15	33	1125	5458	GRMZM2G095082_P01, GRMZM2G702490_P02, GRMZM2G029566_P01, GRMZM5G876898_P01, GRMZM2G052630_P03, GRMZM5G852968_P03, AC234201.1_FGP003, GRMZM2G119482_P01, GRMZM2G019926_P03, GRMZM2G127361_P01, GRMZM2G073059_P01, GRMZM2G104310_P03, GRMZM2G061702_P01, GRMZM2G381051_P03, GRMZM2G374302_P01
GO:0006779	porphyrin-containing compound biosynthetic process	BIOLOGICAL_PROCESS	0.0396439	15	37	1125	5454	GRMZM2G162672_P02, GRMZM2G364901_P04, GRMZM2G095082_P01, GRMZM2G165655_P01, GRMZM2G025882_P01, GRMZM2G449496_P01, GRMZM2G136522_P01, GRMZM2G015967_P01, GRMZM2G111216_P01, GRMZM2G127361_P01, GRMZM2G109165_P01, GRMZM2G116258_P01, GRMZM5G859195_P01, GRMZM2G377761_P01, GRMZM2G039396_P01
GO:0018193	peptidyl-amino acid modification	BIOLOGICAL_PROCESS	0.041419	15	126	1125	5365	GRMZM2G418752_P01, GRMZM2G001956_P01, GRMZM2G023715_P01, GRMZM2G117968_P01, GRMZM2G150337_P03, GRMZM2G015967_P01, GRMZM2G488458_P01, GRMZM2G068963_P01, GRMZM2G007486_P02, GRMZM2G070807_P01, GRMZM2G048277_P02, GRMZM2G035708_P07, GRMZM2G155753_P05, GRMZM2G129781_P01, GRMZM2G132811_P01
[truncated: 344 more rows]
